# Supplementary material for: Misregulation of AUXIN RESPONSE FACTOR 8 Underlies the Developmental Abnormalities Caused by Three Distinct Viral Silencing Suppressors in Arabidopsis
Source: PubMed Central journal article supplement (PMC3093370; doi:10.1371/journal.ppat.1002035), 2011-05-12
Supplement: ppat.1002035.s016.pdf [file ppat.1002035.s016.pdf]

leaves\_1sup\_AG01\_SoLexa\_Mi\_Cell\_2008\_hit\_target\_site.txt

SRNA\_AG01\_SoLexa\_Mi2008\_1\_24183\_hit1

5' UAUAAAAGAAACGCACCAUUGUU  
||||||| ||| ||| |||  
AUUUUUUCUGUGCGAGGU-ACAA 5'

AT1G01340.1 2016 2037  
CaM-regulated potassium ion channel (ACBK1)

SRNA\_AG01\_SoLexa\_Mi2008\_1\_7085\_hit1

5' CAUCUCUCAGACGCUUUUAU  
||||||| |||  
AUAGAGAGUCUGC--AAUA 5'

AT1G01480.2 1399 1415  
1-aminocyclopropane-1-carboxylate synthase (ACC2)

SRNA\_AG01\_SoLexa\_Mi2008\_1\_7085\_hit1

5' CAUCUCUCAGACGCUUUUAU  
||||||| |||  
AUAGAGAGUCUGC--AAUA 5'

AT1G01480.1 1584 1600  
1-aminocyclopropane-1-carboxylate synthase (ACC2)

SRNA\_AG01\_SoLexa\_Mi2008\_1\_14075\_hit1

5' GAGGCAAAGAUGAAAAGGA  
| | | |||||  
CGCC-UUUCUACUUUCCU 5'

AT1G01480.1 191 208  
1-aminocyclopropane-1-carboxylate synthase (ACC2)

SRNA\_AG01\_SoLexa\_Mi2008\_4\_14108\_hit2

5' GAGGUAAGAUGAAAAGGA  
| | | |||||  
CGCC-UUUCUACUUUCCU 5'

AT1G01480.1 191 208  
1-aminocyclopropane-1-carboxylate synthase (ACC2)

SRNA\_AG01\_SoLexa\_Mi2008\_23\_6457\_hit4

5' CAGG-AGAACAUGAUCGUUU  
||| ||||| |||  
AUCCGUCUUGUACUAACAAA 5'

AT1G01480.2 293 312  
1-aminocyclopropane-1-carboxylate synthase (ACC2)

SRNA\_AG01\_SoLexa\_Mi2008\_23\_6457\_hit4

5' CAGG-AGAACAUGAUCGUUU  
||| ||||| |||  
AUCCGUCUUGUACUAACAAA 5'

AT1G01480.1 478 497  
1-aminocyclopropane-1-carboxylate synthase (ACC2)

SRNA\_AG01\_SoLexa\_Mi2008\_1\_12622\_hit1

5' CUUCGAUUGGUGAGAU-UG  
||||||| |||  
GAAGCUAACCCACU-UACAC 5'

AT1G01590.1 1726 1744  
ferric-chelate reductase FRO1

SRNA\_AG01\_SoLexa\_Mi2008\_1\_45244\_hit1

5' UGUGGAAAAGGUGUAUGG-UAG  
||||||| ||| |||  
ACACCUUUCCACAAACCGAUC 5'

AT1G01740.1 409 430  
protein kinase, putative

leaves\_1sup\_AG01\_SoLexa\_Mi\_Cell\_2008\_hit\_target\_site.txt

SRNA\_AG01\_SoLexa\_Mi2008\_1\_30935\_hit6

5' UCGAGUGAACGGUGAGGUCG  
|||||||  
CUCUCACUUGCCACUCCAGU 5'  
AT1G02190.2 1157 1176  
CER1-like protein

SRNA\_AG01\_SoLexa\_Mi2008\_2\_43441\_hit1

5' UGGUGGAGAGCUAUCUGUGU  
||||||| |||||  
ACCACCUCUCG--AGACACU 5'  
AT1G02190.2 510 527  
CER1-like protein

SRNA\_AG01\_SoLexa\_Mi2008\_1\_31046\_hit2

5' UCGAGUGGUGGUGAGAAGUGGU  
||||||| |||||  
AGCUCACCACCACUCUU-ACCA 5'  
AT1G02190.2 548 568  
CER1-like protein

SRNA\_AG01\_SoLexa\_Mi2008\_1\_52312\_hit1

5' UUG-GCAUGCAUCAUAAGGAUA  
||| ||||| |||||  
AACACGUA-GUAGUAUUCUAA 5'  
AT1G02220.1 1116 1136  
hypothetical protein

SRNA\_AG01\_SoLexa\_Mi2008\_1\_3\_hit25

5' AAAA-AAAAAAAAAGAAAGA  
||| ||||| ||||| |  
CUUUUUUUUUUUUCUUUGU 5'  
AT1G02840.2 1068 1087  
ribonucleoprotein SF-2 like protein

SRNA\_AG01\_SoLexa\_Mi2008\_3\_23994\_hit1

5' UAGUGGUGUCA AUGUACAUG  
||||||| |||||  
AUCACCAC-GUUACAUUGUAC 5'  
AT1G02850.5 479 498  
Similar to beta-glucosidases (At1g02850)

SRNA\_AG01\_SoLexa\_Mi2008\_1\_54567\_hit1

5' UUUUUCUGCAUCAAGAA-A-AGA  
||||||| ||||| |||||  
AAAUAGAAGUAGUUCUUGUCUCU 5'  
AT1G03370.1 2844 2866  
unknown protein

SRNA\_AG01\_SoLexa\_Mi2008\_1\_38019\_hit2

5' UGCAGAGGAAAGAUGUUGUG  
||||||| |||||  
ACGUCUCCUUCC-CAACAC 5'  
AT1G03550.1 1106 1124

SRNA\_AG01\_SoLexa\_Mi2008\_7\_14062\_hit1

5' GAGGAGGAGGAGGUGAACA  
||||||| |||||  
CUCCUCCUCCUCCUUC 5'  
AT1G03610.1 352 370  
unknown protein

SRNA\_AG01\_SoLexa\_Mi2008\_1\_29316\_hit1

leaves\_1sup\_AG01\_SoLexa\_Mi\_Cell\_2008\_hit\_target\_site.txt

5' UCCAC-AAGGG-GUUAUGCAAUGAAG  
:||||| ||||| ||||| ||||| ||||| |||||  
GGGUGAUUCCACAAUACGUUACUUC 5'  
AT1G03610.1 466 491  
unknown protein

SRNA\_AG01\_SoLexa\_Mi2008\_58\_10471\_hit1  
5' CUAUCCAUAAGUACCAGGCUCA  
||||| ||||| ||||| ||||| |||||  
GAUAGGUAUCAUAGU-CGAGA 5'  
AT1G03740.2 2574 2593

SRNA\_AG01\_SoLexa\_Mi2008\_1\_41621\_hit1  
5' UGGCUGAGCCAACAAUGGUCC  
||||| ||||| ||||| ||||| ||||| |||||  
ACCGACUCGGUUGUUACCAGG 5'  
AT1G03740.1 2660 2680

SRNA\_AG01\_SoLexa\_Mi2008\_1\_41621\_hit1  
5' UGGCUGAGCCAACAAUGGUCC  
||||| ||||| ||||| ||||| ||||| |||||  
ACCGACUCGGUUGUUACCAGG 5'  
AT1G03740.2 2742 2762

SRNA\_AG01\_SoLexa\_Mi2008\_1\_51111\_hit1  
5' UUGAUGAUGAUGAUGGUUUGA  
||||| ||||| ||||| ||||| ||||| |||||  
UACUACUACUACUACCAAUA 5'  
AT1G03850.2 158 178  
unknown protein

SRNA\_AG01\_SoLexa\_Mi2008\_9\_14254\_hit8  
5' GAUGAUGAUGAUGAUGAUCUU  
||||| ||||| ||||| ||||| ||||| |||||  
CUACUACUACUACUACCA-AA 5'  
AT1G03850.2 161 180  
unknown protein

SRNA\_AG01\_SoLexa\_Mi2008\_9\_14254\_hit8  
5' GAUGAUGAUGAUGAUGAUCUU  
||||| ||||| ||||| ||||| ||||| |||||  
CUACUACUACUACUACUACCA 5'  
AT1G03850.2 162 182  
unknown protein

SRNA\_AG01\_SoLexa\_Mi2008\_6\_14255\_hit369  
5' GAUGAUGAUGAUGAUGAUGAU  
:||||| ||||| ||||| ||||| ||||| |||||  
UUACUACUACUACUACUACCA 5'  
AT1G03850.2 162 185  
unknown protein

SRNA\_AG01\_SoLexa\_Mi2008\_1\_14256\_hit8  
5' GAUGAUGAUGAUGAUGAUGAUG-UU  
||||| ||||| ||||| ||||| ||||| |||||  
AUACUACUACUACUACUACCAA 5'  
AT1G03850.2 162 186  
unknown protein

SRNA\_AG01\_SoLexa\_Mi2008\_7\_3078\_hit1  
5' AUGAUGAUGA-GAAUGAUGAU  
||||| ||||| ||||| ||||| |||||  
UACUACUACUAC-UACUACCA 5'

AT1G03850.2 163 182  
unknown protein

SRNA\_AG01\_SoLexa\_Mi2008\_1\_36323\_hit13  
5' UGAGGAUGAUGAUGAUGAUGA  
||| ||||||||||||||||  
ACUACUACUACUACUACUACC 5'  
AT1G03850.2 163 183  
unknown protein

SRNA\_AG01\_SoLexa\_Mi2008\_1\_3079\_hit472  
5' AUGAUGAUGAUGAUGAUGAUGA  
||||| ||||||||||||||||  
UACUACUACUACUACUACUACC 5'  
AT1G03850.2 163 184  
unknown protein

SRNA\_AG01\_SoLexa\_Mi2008\_1\_45039\_hit3  
5' UGUGAUGAUGAUGAUGAUGAUGA  
:||||| ||||||||||||||||  
UUACUACUACUACUACUACUACC 5'  
AT1G03850.2 163 185  
unknown protein

SRNA\_AG01\_SoLexa\_Mi2008\_1\_56092\_hit3  
5' UUUG-UGAUGAUGAUGAUGAUGA  
||| ||||||||||||||||  
AAACUACUACUACUACUACUACC 5'  
AT1G03850.2 164 186  
unknown protein

SRNA\_AG01\_SoLexa\_Mi2008\_6\_14255\_hit369  
5' GAUGAUGAUGAUGAUGAUGAUGAU  
|||:||||| ||||||||||||||||  
CUAUUACUACUACUACUACUACUA 5'  
AT1G03850.2 165 188  
unknown protein

SRNA\_AG01\_SoLexa\_Mi2008\_1\_14256\_hit8  
5' GAUGAUGAUGAUGAUGAUGAUGUU  
|||:||||| |||||||||||||||| |  
CUAUUACUACUACUACUACUACUA 5'  
AT1G03850.2 165 188  
unknown protein

SRNA\_AG01\_SoLexa\_Mi2008\_7\_3078\_hit1  
5' AUGAUGAUGA-GAAUGAUGAU  
||||| ||| ||| ||| |||  
UACUACUACUACU-ACUACUA 5'  
AT1G03850.2 166 185  
unknown protein

SRNA\_AG01\_SoLexa\_Mi2008\_1\_3079\_hit472  
5' AUGAUGAUGAUGAUGAUGAUGA  
||:||||| ||||||||||||||||  
UAUUACUACUACUACUACUACU 5'  
AT1G03850.2 166 187  
unknown protein

SRNA\_AG01\_SoLexa\_Mi2008\_6\_14255\_hit369  
5' GAUGAUGAUGAUGAUGAUGAUGAU  
|||||:||||| ||||||||||||||||  
GUACUAUUACUACUACUACUACUA 5'

leaves\_1sup\_AG01\_SoLexa\_Mi\_Cell\_2008\_hit\_target\_site.txt

AT1G03850.2 168 191  
unknown protein

SRNA\_AG01\_SoLexa\_Mi2008\_1\_3079\_hit472

5' AUGAUGAUGAUGAUGAUGAUGAUGAUGAUGA  
| | | | | : | | | | | | | | | | | | | | | | | | |  
UACUAUUACUACUACUACUACU 5'  
AT1G03850.2 169 190  
unknown protein

SRNA\_AG01\_SoLexa\_Mi2008\_1\_45039\_hit3

5' UGUGAUGAUGAUGAUGAUGAUGAUGAUGAUGA  
: | | | | | : | | | | | | | | | | | | | | | | | | |  
GUACUAUUACUACUACUACUACU 5'  
AT1G03850.2 169 191  
unknown protein

SRNA\_AG01\_SoLexa\_Mi2008\_4\_14169\_hit1

5' GAUAAUGAUGAUGAAAGAUGA  
| | | | | | | | | | | | | | | | | | | | | | | | |  
CUAUUACUACUACUA-CUACU 5'  
AT1G03850.2 170 189  
unknown protein

SRNA\_AG01\_SoLexa\_Mi2008\_2\_28918\_hit1

5' UCAUCUCAGAACCUACCCGUA  
| | | | | | | | | | | | | | | | | | | | | | | | |  
AGUAGAGUCUUGGAUAGGCAU 5'  
AT1G03850.1 661 681  
unknown protein

SRNA\_AG01\_SoLexa\_Mi2008\_1\_35367\_hit1

5' UGACC-AGAACGCAGAUUGC  
| | | | | | | | | | | | | | | | | | | | | | | | |  
ACUGGGUCUUGCGUCGACGCU 5'  
AT1G03910.1 1181 1201  
hypothetical protein

SRNA\_AG01\_SoLexa\_Mi2008\_1\_7045\_hit20

5' CAUCGCCUGCACCUAUGUUGUU  
| | | | | | | | | | | | | | | | | | | | | | | | |  
AUAGCGGACAUGGAUACAGCAA 5'  
AT1G03910.1 2105 2126  
hypothetical protein

SRNA\_AG01\_SoLexa\_Mi2008\_2\_13419\_hit2

5' GAAGAAGAAGAAGACACUU  
| | | | | | | | | | | | | | | | | | | | | | | | |  
CUUCUUCUUCUUCUGUUCG 5'  
AT1G04310.1 206 224  
putative ethylene receptor ERS2

SRNA\_AG01\_SoLexa\_Mi2008\_1\_13420\_hit2

5' GAAGAAGAAGAAGACUCUU  
| | | | | | | | | | | | | | | | | | | | | | | | |  
CUUCUUCUUCUUC--AGAU 5'  
AT1G04310.1 90 106  
putative ethylene receptor ERS2

SRNA\_AG01\_SoLexa\_Mi2008\_1\_13305\_hit1

5' CUUUUUGGGCUU-CUGAUACUC  
| | | | | | | | | | | | | | | | | | | | | | | | |  
GAAAAACCCGAAUGA-UAUGAG 5'

AT1G05380.1 1094 1114  
unknown protein

SRNA\_AG01\_SoLexa\_Mi2008\_1\_13305\_hit1

5' CUUUUUUGGGCUU-CUGAUACUC  
|||||  
GAAAAACCCGAAUGA-UAUGAG 5'

AT1G05380.2 1115 1135  
unknown protein

SRNA\_AG01\_SoLexa\_Mi2008\_1\_38059\_hit1

5' UGCAGCAAUCACAAAUGGU  
|||||  
ACGUCGUUAGUGUU-ACUU 5'

AT1G05380.1 1944 1961  
unknown protein

SRNA\_AG01\_SoLexa\_Mi2008\_1\_38059\_hit1

5' UGCAGCAAUCACAAAUGGU  
|||||  
ACGUCGUUAGUGUU-ACUU 5'

AT1G05380.2 1965 1982  
unknown protein

SRNA\_AG01\_SoLexa\_Mi2008\_1\_44558\_hit1

5' UGUC-A-UUGAUGGAGAACAAGAU  
|||||  
ACAGGUGAACUACCUCUCGUUCUA 5'

AT1G05380.1 2103 2126  
unknown protein

SRNA\_AG01\_SoLexa\_Mi2008\_1\_44558\_hit1

5' UGUC-A-UUGAUGGAGAACAAGAU  
|||||  
ACAGGUGAACUACCUCUCGUUCUA 5'

AT1G05380.2 2124 2147  
unknown protein

SRNA\_AG01\_SoLexa\_Mi2008\_1\_37628\_hit1

5' UGCAAAAACGGAUAAUCU-AGC  
|||||  
ACGUUUUCGCCUAAUAGAGUCC 5'

AT1G05460.1 1631 1652  
unknown protein

SRNA\_AG01\_SoLexa\_Mi2008\_1\_1123\_hit2

5' AAUGGAGAAGCAGAUCGAAGA  
|||||  
UUACCUCUUCGU-UA-CUUCG 5'

AT1G05460.1 71 89  
unknown protein

SRNA\_AG01\_SoLexa\_Mi2008\_2\_27439\_hit1

5' UCAAUG-CAUGUGGCUGUCAACA  
|||||  
AGUU-CAGUACAUCGACAGUUGU 5'

AT1G05570.1 2658 2679  
putative glucan synthase

SRNA\_AG01\_SoLexa\_Mi2008\_7\_3892\_hit1

5' CAAAACCAGAAGGA-UGAUAAAG  
|||||  
GUUUUGGUCUGCCUAAU-UUUC 5'

AT1G05570.1 5113 5134  
putative glucan synthase

SRNA\_AG01\_SoLexa\_Mi2008\_1\_3891\_hit1

5' CAAAACCAGAAGGA-UGAUAAA  
|||||  
GUUUUGGUCUGCCUAACU-UUU 5'

AT1G05570.1 5114 5134  
putative glucan synthase

SRNA\_AG01\_SoLexa\_Mi2008\_30\_44251\_hit5

5' UGUAGGUACAACAACAUUUGGUC  
|||||  
ACAUACAUGUUGUAAAACCCC 5'

AT1G05670.1 2691 2711  
UDP glycosyltransferase UGT74E1

SRNA\_AG01\_SoLexa\_Mi2008\_1\_54576\_hit1

5' UUUUUGAGCUCUAAAACGACGUC  
||| ||| ||| |||  
AAA-ACGCGA-AUUUUGCUGCAG 5'

AT1G05710.3 136 156  
unknown protein

SRNA\_AG01\_SoLexa\_Mi2008\_1\_34211\_hit3

5' UGAAAGAGAGAUGAGAGCUUU  
|||||  
ACUUUCUCUCUAGUCU-GAAC 5'

AT1G05710.4 149 168  
unknown protein

SRNA\_AG01\_SoLexa\_Mi2008\_1\_34211\_hit3

5' UGAAAGAGAGAUGAGAGCUUU  
|||||  
ACUUUCUCUCUAGUCU-GAAC 5'

AT1G05710.1 260 279  
unknown protein

SRNA\_AG01\_SoLexa\_Mi2008\_1\_34211\_hit3

5' UGAAAGAGAGAUGAGAGCUUU  
|||||  
ACUUUCUCUCUAGUCU-GAAC 5'

AT1G05710.3 521 540  
unknown protein

SRNA\_AG01\_SoLexa\_Mi2008\_2\_41651\_hit1

5' UGGCUUAAACACAACGUAU-GUAG  
|||||  
ACCGAAUUGUGUUUC-UAGCAUC 5'

AT1G05710.4 536 557  
unknown protein

SRNA\_AG01\_SoLexa\_Mi2008\_2\_41651\_hit1

5' UGGCUUAAACACAACGUAU-GUAG  
|||||  
ACCGAAUUGUGUUUC-UAGCAUC 5'

AT1G05710.1 647 668  
unknown protein

SRNA\_AG01\_SoLexa\_Mi2008\_2\_41651\_hit1

5' UGGCUUAAACACAACGUAU-GUAG  
|||||  
ACCGAAUUGUGUUUC-UAGCAUC 5'

AT1G05710.3 908 929  
unknown protein

SRNA\_AG01\_SoLexa\_Mi2008\_2\_41651\_hit1

5' UGGCUUAAACACAACGUUU-GUAG  
| | | | | | | | | | | | | | | | | | | | | | | |  
ACCGAAUUGUGUUUC-UAGCAUC 5'

AT1G05710.2 974 995  
unknown protein

SRNA\_AG01\_SoLexa\_Mi2008\_1\_44921\_hit1

5' UGUGAAUGAUGCUAUUUGUG  
| | | | | | | | | | | | | | | | | | | | | | | |  
UGACUUACAACGAUUAUACAC 5'

AT1G06150.1 2946 2966  
unknown protein

SRNA\_AG01\_SoLexa\_Mi2008\_1\_34211\_hit3

5' UGAAAGAGAGAUGAGA-GCUUU  
| | | | | | | | | | | | | | | | | | | | | | | |  
ACUUUCUCUCUACU-UGUGAAA 5'

AT1G06150.1 42 62  
unknown protein

SRNA\_AG01\_SoLexa\_Mi2008\_3\_39710\_hit4

5' UGGAAGAAAUGUAGUAUU  
: | | | | | | | | | | | | | | | | | | | | | | | |  
GUCUUGUUUAACAUCAUAA 5'

AT1G06840.1 1188 1206  
receptor protein kinase, putative

SRNA\_AG01\_SoLexa\_Mi2008\_1\_25303\_hit1

5' UAUGAGAGAGAAUUGUUGCAA  
| | | | | | | | | | | | | | | | | | | | | | | |  
AUACU-U-UCUUAACAACCGUA 5'

AT1G06840.1 1457 1476  
receptor protein kinase, putative

SRNA\_AG01\_SoLexa\_Mi2008\_1\_28646\_hit2

5' UCAGUAUCGCGUGCGGGCUUC-CA  
| | | | | | | | | | | | | | | | | | | | | | | |  
AGUCAAGCGACGCACGAAGUGU 5'

AT1G07000.1 1454 1476  
unknown protein

SRNA\_AG01\_SoLexa\_Mi2008\_9\_14254\_hit8

5' GAUGAUGAUGAUGAUGAUCUU  
| | | | | | | | | | | | | | | | | | | | | | | |  
AUACUACUACUACUACGAGAC 5'

AT1G07530.1 1084 1104  
transcription factor scarecrow-like 14, putative

SRNA\_AG01\_SoLexa\_Mi2008\_1\_39866\_hit1

5' UGGAAUUGGGCAACAAGAUGAC  
| | | | | | | | | | | | | | | | | | | | | | | |  
ACCU-AAGCCGUUGUUCUACUG 5'

AT1G07530.1 134 154  
transcription factor scarecrow-like 14, putative

SRNA\_AG01\_SoLexa\_Mi2008\_1\_48560\_hit1

5' UUC-AAUGAUAAAGCGGUGU  
| | | | | | | | | | | | | | | | | | | | | | | |  
AAGCUU-CUAUUUCGCCACA 5'

AT1G07530.1 1589 1607  
transcription factor scarecrow-like 14, putative

SRNA\_AG01\_SoLexa\_Mi2008\_1\_45985\_hit1

5' UGUUGAUGUUGUUGUCGUUAG  
|||||  
ACAACUACAACAACAACAACA 5'

AT1G07530.1 403 423  
transcription factor scarecrow-like 14, putative

SRNA\_AG01\_SoLexa\_Mi2008\_1\_52302\_hit3

5' UUGGCAGGGUCAUCCUUGGAG  
|||||  
AACCGUCCCAGUAGGAACCUC 5'

AT1G07930.1 1072 1092  
elongation factor 1-alpha

SRNA\_AG01\_SoLexa\_Mi2008\_1\_27291\_hit3

5' UCAAGGUUGGUGGACCUCUCA  
|||||  
AGUCCAACCACCUUGGAGAGU 5'

AT1G07930.2 730 750  
elongation factor 1-alpha

SRNA\_AG01\_SoLexa\_Mi2008\_1\_52302\_hit3

5' UUGGCAGGGUCAUCCUUGGAG  
|||||  
AACCGUCCCAGUAGGAACCUC 5'

AT1G07940.1 1064 1084  
elongation factor 1-alpha

SRNA\_AG01\_SoLexa\_Mi2008\_1\_52302\_hit3

5' UUGGCAGGGUCAUCCUUGGAG  
|||||  
AACCGUCCCAGUAGGAACCUC 5'

AT1G07940.2 1191 1211  
elongation factor 1-alpha

SRNA\_AG01\_SoLexa\_Mi2008\_1\_351\_hit2

5' AAAGAAGAAAAACAGAUCU  
|||||  
AGUCUUCUUUUUGUCU-GA 5'

AT1G07940.1 1754 1771  
elongation factor 1-alpha

SRNA\_AG01\_SoLexa\_Mi2008\_1\_351\_hit2

5' AAAGAAGAAAAACAGAUCU  
|||||  
AGUCUUCUUUUUGUCU-GA 5'

AT1G07940.2 1881 1898  
elongation factor 1-alpha

SRNA\_AG01\_SoLexa\_Mi2008\_1\_27291\_hit3

5' UCAAGGUUGGUGGACCUCUCA  
|||||  
AGUCCAACCACCUUGGAGAGU 5'

AT1G07940.1 722 742  
elongation factor 1-alpha

SRNA\_AG01\_SoLexa\_Mi2008\_1\_27291\_hit3

5' UCAAGGUUGGUGGACCUCUCA  
|||||  
AGUCCAACCACCUUGGAGAGU 5'

AT1G07940.2 849 869  
 elongation factor 1-alpha

SRNA\_AG01\_SoLexa\_Mi2008\_1\_3\_hit25

5' AA-AAAAAAA-AAAAGAAAGA  
 || ||||| |||||:  
 UUAUUUUUUUCUUUUUCUUUU 5'  
 AT1G08050.1 2250 2270  
 unknown protein

SRNA\_AG01\_SoLexa\_Mi2008\_1\_172\_hit2

5' AAAAGAAGAAGUA-AAGCA  
 ||||| ||||| | ||| |  
 UUUUCUUCUUCU-UCUUCUU 5'  
 AT1G08050.1 2 20  
 unknown protein

SRNA\_AG01\_SoLexa\_Mi2008\_2\_16280\_hit2

5' UAAAAAGAAGAAGUA-AAGCA  
 ||||| ||||| | ||| |  
 AUUUUUUCUUCUUCU-UCUUCUU 5'  
 AT1G08050.1 2 22  
 unknown protein

SRNA\_AG01\_SoLexa\_Mi2008\_1\_2\_hit38

5' AAAAAAAAAAAAAAAC-CAU  
 ||||| ||||| |||  
 UUUUUUUU-UUUUUUGAGUA 5'  
 AT1G08650.1 1145 1163  
 putative calcium-dependent protein kinase (U90439)

SRNA\_AG01\_SoLexa\_Mi2008\_3\_32841\_hit1

5' UCUACUGAGGUUGAGUGGG  
 :|||  
 GGAUGACUCCAACUCACGA 5'  
 AT1G08700.1 1066 1084  
 presenilin like protein

SRNA\_AG01\_SoLexa\_Mi2008\_1\_40235\_hit1

5' UGGA-GACGAAGAUGAUGGC-UU  
 |||| |||||:||||| ||  
 ACCUGCUGCUUCUGCUACCGCAA 5'  
 AT1G08700.1 331 353  
 presenilin like protein

SRNA\_AG01\_SoLexa\_Mi2008\_1\_50433\_hit1

5' UUGACUCACCGUGACGCAUUA  
 :|||  
 GACUGAGUGGCACUGCGUAAU 5'  
 AT1G08940.1 42 62  
 unknown protein

SRNA\_AG01\_SoLexa\_Mi2008\_2\_41914\_hit2

5' UGGGAUCUUGUGAU-GGAU-UGGU  
 ||||| ||||| || | ||||  
 ACCCUAGAACACUAGCCCACACCA 5'  
 AT1G08940.1 93 116  
 unknown protein

SRNA\_AG01\_SoLexa\_Mi2008\_1\_21117\_hit1

5' UAGACUAAGGCUCCGAAUG-GU  
 :|||  
 GUCUGAUUCCGUGGCUUACACA 5'

AT1G09560.1      269      290  
germin-like protein

SRNA\_AG01\_SoLexa\_Mi2008\_1\_351\_hit2

5' AAAGAAGA-AAAACAGAUCU  
||| ||||| ||||| |||||  
UUUCUUCUAUUUU-UCUAGA 5'

AT1G09560.1      771      789  
germin-like protein

SRNA\_AG01\_SoLexa\_Mi2008\_9\_6904\_hit1

5' CAUAGGGCUUUCUGCGAUGCA  
|| ||||| ||||| ||||| : |||||  
GU-UCCCGAAAGACGUUACGU 5'

AT1G09570.2      544      563  
putative phytochrome A

SRNA\_AG01\_SoLexa\_Mi2008\_9\_6904\_hit1

5' CAUAGGGCUUUCUGCGAUGCA  
|| ||||| ||||| ||||| : |||||  
GU-UCCCGAAAGACGUUACGU 5'

AT1G09570.1      635      654  
putative phytochrome A

SRNA\_AG01\_SoLexa\_Mi2008\_2\_6628\_hit1

5' CAGGUGAUGGUGUAAUCAA  
||| ||||| ||||| ||||| : |||||  
GUC-ACUACCACAUUGGUU 5'

AT1G10010.1      383      400  
putative amino acid permease

SRNA\_AG01\_SoLexa\_Mi2008\_3\_54736\_hit4

5' UUUCAGUGAACAGAUUG-AGUG  
: ||||| ||||| ||||| |||||  
GAAGUCACUUUUCUAACAUCAC 5'

AT1G10090.1      2163      2184  
hypothetical protein

SRNA\_AG01\_SoLexa\_Mi2008\_1\_26464\_hit13

5' UAUUUCAGGAAAUCAGA-UGGCA  
| |||| | ||||| ||||| ||||| |||||  
ACAAAGACCUUUAGUCUUACCGU 5'

AT1G10450.1      1510      1532  
unknown protein

SRNA\_AG01\_SoLexa\_Mi2008\_1\_369\_hit5

5' AAAGAAUGCCAAUGAUGAGGU  
||| ||||| ||||| ||||| ||||| :  
UUUCUUACGGUUUCUAC-CCG 5'

AT1G10450.1      1854      1873  
unknown protein

SRNA\_AG01\_SoLexa\_Mi2008\_1\_40683\_hit1

5' UGGAGUCAGACG-AGCAAGUGA  
: ||||| ||||| ||||| ||||| |||||  
GCCUCAGUC-GCCUCGUUCACU 5'

AT1G10450.1      851      871  
unknown protein

SRNA\_AG01\_SoLexa\_Mi2008\_1\_13075\_hit1

5' CUUGUGAUUUCAGAUUUGCUU  
||| ||||| ||||| ||||| |||||  
UAACACUAAAGGCCUAUA-GAA 5'

AT1G10450.1 977 996  
 unknown protein

SRNA\_AG01\_SoLexa\_Mi2008\_16\_2965\_hit6

5' AUGAAG-GCCCAUCACGUG-UUU  
 ||||| |||||  
 CACUUCUCGGGUAGUGCACCAAA 5'

AT1G11000.1 1097 1119  
 membrane protein Mlo4

SRNA\_AG01\_SoLexa\_Mi2008\_2\_35370\_hit1

5' UGACC-AGAUCCCAUCUGUGUA  
 || || |||||  
 AC-GGCUCUAGGGUAGACUCAU 5'

AT1G11000.1 1330 1350  
 membrane protein Mlo4

SRNA\_AG01\_SoLexa\_Mi2008\_2\_47511\_hit2

5' UUAGCAACCGGACAUUGAG  
 |||||  
 AAUCGUUGGACCUGUAAAGG 5'

AT1G12000.1 1296 1315  
 putative pyrophosphate-fructose-6-phosphate 1-phosphotransferase

SRNA\_AG01\_SoLexa\_Mi2008\_1\_50661\_hit2

5' UUGAGGAGUACUC-AGCACCAA  
 |||||  
 AACUCCUCAUGAGGUCGCGGUA 5'

AT1G12000.1 1487 1508  
 putative pyrophosphate-fructose-6-phosphate 1-phosphotransferase

SRNA\_AG01\_SoLexa\_Mi2008\_1\_53320\_hit2

5' UUGUAGAGAAACAUGAGAGAAA  
 ||| | |||||:|||||  
 AAC-U-UCUUUGUGCUCUCUUU 5'

AT1G12000.1 1960 1979  
 putative pyrophosphate-fructose-6-phosphate 1-phosphotransferase

SRNA\_AG01\_SoLexa\_Mi2008\_1\_5136\_hit2

5' CAAUGACAUUGAGUGCAAGUG  
 ||||| |||||  
 GUUACUGUAAGUCACGAUCAC 5'

AT1G12210.1 1054 1074  
 NBS/LRR disease resistance protein

SRNA\_AG01\_SoLexa\_Mi2008\_1\_33147\_hit1

5' UCUC-C-AAUGACAUUAAGUGCU  
 |||| | |||||  
 AGAGUGGUUACUGUAAGUCACGA 5'

AT1G12210.1 1059 1081  
 NBS/LRR disease resistance protein

SRNA\_AG01\_SoLexa\_Mi2008\_1\_28067\_hit1

5' UCAGAAUCUUCAGGAAACAGAG  
 |||:|||||  
 AGUUUUAGAAGUCCUUUAUCUC 5'

AT1G12210.1 1243 1264  
 NBS/LRR disease resistance protein

SRNA\_AG01\_SoLexa\_Mi2008\_17\_20513\_hit1

5' UACUCCGCCCAUACCAUACAUA  
 |||||:|||||  
 AUGAGGUGGGUAUGGUAUGUCU 5'

leaves\_1sup\_AG01\_SoLexa\_Mi\_Cell\_2008\_hit\_target\_site.txt

AT1G12210.1 539 560  
NBS/LRR disease resistance protein

SRNA\_AG01\_SoLexa\_Mi2008\_1\_30136\_hit1

5' UCCUACUCCGCCCAUACCAUAC  
|||||||:|||||||  
CGGAUGAGGUGGGUAUGGUAUG 5'

AT1G12210.1 542 563  
NBS/LRR disease resistance protein

SRNA\_AG01\_SoLexa\_Mi2008\_1\_10997\_hit1

5' CUCGAGAUAGGUUUUGGAC  
||| |||||||||  
GAG-UCUAUCCAAACCUA 5'

AT1G12210.1 85 102  
NBS/LRR disease resistance protein

SRNA\_AG01\_SoLexa\_Mi2008\_55\_5422\_hit1

5' CACCAAG-CCAAGAAGUCGACU  
|||| | |||||||||  
AUGGUGCUGGUUCUUCAGCUGA 5'

AT1G12320.1 417 438  
unknown protein (At1g12320)

SRNA\_AG01\_SoLexa\_Mi2008\_1\_49711\_hit26

5' UUCUCAACAAUG-CAUCAUA  
||||||| ||| ||  
AAGAGUUGUUACAGUA-UAG 5'

AT1G12800.1 794 812  
unknown protein

SRNA\_AG01\_SoLexa\_Mi2008\_1\_6621\_hit1

5' CA-GG-UGAAGAAGUAACGU  
|| || ||||||| |||||  
GUACCUACUUCUUCUCUUGCA 5'

AT1G13340.1 296 316  
unknown protein

SRNA\_AG01\_SoLexa\_Mi2008\_2\_116\_hit3

5' AAAAAGAUAGAGA-GAUAG  
||||||| ||| ||  
UUUUUCUAUUCUCUUCUCUC 5'

AT1G13390.1 15 34  
hypothetical protein

SRNA\_AG01\_SoLexa\_Mi2008\_7\_1811\_hit1

5' AGAAGGGUGAAAGUAAGAGCA  
||||| ||||| |||||  
UCUUC-ACUUUCUUUCUCGU 5'

AT1G13390.2 261 280  
hypothetical protein

SRNA\_AG01\_SoLexa\_Mi2008\_1\_27462\_hit1

5' UCAAUGGAGGCAAUGAAUCGGU  
||||||| |||||||||  
AGUUACCUCCGUUACUUAGCCA 5'

AT1G13640.1 104 125  
unknown protein

SRNA\_AG01\_SoLexa\_Mi2008\_1\_29847\_hit2

5' UCCGAAUGGUGAUUGCGUUUUGC  
||||| ||| ||||||||| ||  
AGGCU-ACCAGUAACGCAAA-CG 5'

AT1G14010.1 181 201  
transmembrane like protein

SRNA\_AG01\_SoLexa\_Mi2008\_3\_4568\_hit12

5' CAAGAAGAAG-AUGAGAACAAUG  
||| | | | | | | | | | | | | | | | | | | | | |  
GUUCUUCUCCU-CUCUUGUUAC 5'

AT1G14330.1 222 243  
unknown protein

SRNA\_AG01\_SoLexa\_Mi2008\_2\_6214\_hit2

5' CAGAUUGGUCUU-UUAUGUGUU  
||| | | | | | | | | | | | | | | | | | | | | |  
GUCUAACCAGAACAAGA-ACAA 5'

AT1G14330.1 775 795  
unknown protein

SRNA\_AG01\_SoLexa\_Mi2008\_1\_43234\_hit1

5' UGGUCUUUGCAGUUGUCAGUU  
||| | | | | | | | | | | | | | | | | | | | | |  
ACCAGAGACGUCAAAAAGUCA 5'

AT1G14380.2 1529 1549  
unknown protein

SRNA\_AG01\_SoLexa\_Mi2008\_1\_43234\_hit1

5' UGGUCUUUGCAGUUGUCAGUU  
||| | | | | | | | | | | | | | | | | | | | | |  
ACCAGAGACGUCAAAAAGUCA 5'

AT1G14380.3 1663 1683  
unknown protein

SRNA\_AG01\_SoLexa\_Mi2008\_1\_43234\_hit1

5' UGGUCUUUGCAGUUGUCAGUU  
||| | | | | | | | | | | | | | | | | | | | | |  
ACCAGAGACGUCAAAAAGUCA 5'

AT1G14380.1 1715 1735  
unknown protein

SRNA\_AG01\_SoLexa\_Mi2008\_2\_37991\_hit1

5' UGCAGAAGGCUAAAAGAAGUU  
: | | | | | | | | | | | | | | | | | | | | | | |  
GCGUCU-CCGAUUCUCUUCAA 5'

AT1G14380.2 1878 1897  
unknown protein

SRNA\_AG01\_SoLexa\_Mi2008\_2\_37991\_hit1

5' UGCAGAAGGCUAAAAGAAGUU  
: | | | | | | | | | | | | | | | | | | | | | | |  
GCGUCU-CCGAUUCUCUUCAA 5'

AT1G14380.3 2012 2031  
unknown protein

SRNA\_AG01\_SoLexa\_Mi2008\_2\_37991\_hit1

5' UGCAGAAGGCUAAAAGAAGUU  
: | | | | | | | | | | | | | | | | | | | | | | |  
GCGUCU-CCGAUUCUCUUCAA 5'

AT1G14380.1 2064 2083  
unknown protein

SRNA\_AG01\_SoLexa\_Mi2008\_3\_5252\_hit2

5' CACAAAACCGCAGCUACAU-UAG  
| | | | | | | | | | | | | | | | | | | | | | |  
GU-UUUUGACGUCGAUGUACAUC 5'

AT1G14480.1 268 289  
hypothetical protein

SRNA\_AG01\_Solexa\_Mi2008\_1\_49033\_hit1

5' UUCCCA-CAAA-CUUGAUCGCU  
||| | |||| |||||  
AAGGCUUGUUUGAACUAGCGA 5'

AT1G14540.1 877 898  
peroxidase, putative

SRNA\_AG01\_Solexa\_Mi2008\_1\_167\_hit1

5' AAAAGA-AAGAGAUGGAGAGAU  
||| | |||||  
CUUUCUGUUCUCUACCUCUCUC 5'

AT1G14710.1 65 86  
unknown protein

SRNA\_AG01\_Solexa\_Mi2008\_1\_10354\_hit2

5' CUAG-UCCCAACUCGGAACCG  
||| | |||||  
GAUCGAGGGUUGAGACUUGGUC 5'

AT1G14850.1 2219 2240  
nucleoporin, putative

SRNA\_AG01\_Solexa\_Mi2008\_1\_8623\_hit1

5' CGAGGUGGCUAUGAGCGGUCG  
||| | |||||  
GCUCCACCGAUACUCGCCAGC 5'

AT1G14920.1 1745 1765  
signal response protein (GAI)

SRNA\_AG01\_Solexa\_Mi2008\_9\_14254\_hit8

5' GAUGAUGAUGAUGAUGAUCUU  
||| | |||||:  
CUACUACUACUACUACUAGAG 5'

AT1G14920.1 195 215  
signal response protein (GAI)

SRNA\_AG01\_Solexa\_Mi2008\_6\_14255\_hit369

5' GAUGAUGAUGAUGAUGAUGAUGAU  
||| | |||||:  
CUACUACUACUACUACUAGAG 5'

AT1G14920.1 195 218  
signal response protein (GAI)

SRNA\_AG01\_Solexa\_Mi2008\_1\_14256\_hit8

5' GAUGAUGAUGAUGAUGAUGAUGUU  
||| | |||||:  
CUACUACUACUACUACUAGAG 5'

AT1G14920.1 195 218  
signal response protein (GAI)

SRNA\_AG01\_Solexa\_Mi2008\_1\_36323\_hit13

5' UGAGGAUGAUGAUGAUGAUGAUGA  
||| | |||||  
ACUACUACUACUACUACUAGA 5'

AT1G14920.1 196 216  
signal response protein (GAI)

SRNA\_AG01\_Solexa\_Mi2008\_1\_3079\_hit472

5' AUGAUGAUGAUGAUGAUGAUGA  
||| | |||||  
UACUACUACUACUACUAGA 5'

leaves\_1sup\_AG01\_SoLexa\_Mi\_Cell\_2008\_hit\_target\_site.txt

AT1G14920.1 196 217  
signal response protein (GAI)

SRNA\_AG01\_SoLexa\_Mi2008\_1\_45039\_hit3

5' UG-UGAUGAUGAUGAUGAUGAUGA  
||| ||||||||||||||||||||  
ACUACUACUACUACUACUACUAGA 5'

AT1G14920.1 197 220  
signal response protein (GAI)

SRNA\_AG01\_SoLexa\_Mi2008\_9\_14254\_hit8

5' GAUGAUGAUGAUGAUGAUCUU  
||| ||||||||||||||||| |  
CUACUACUACUACUACUACUA 5'

AT1G14920.1 198 218  
signal response protein (GAI)

SRNA\_AG01\_SoLexa\_Mi2008\_6\_14255\_hit369

5' GAUGAUGAUGAUGAUGAUGAUGAU  
||| |||||||||||||||||  
GAACUACUACUACUACUACUACUA 5'

AT1G14920.1 198 221  
signal response protein (GAI)

SRNA\_AG01\_SoLexa\_Mi2008\_7\_3078\_hit1

5' AUGAUGAUGA-GAAUGAUGAU  
||| ||||||||| || |||||||||  
UACUACUACUACU-ACUACUA 5'

AT1G14920.1 199 218  
signal response protein (GAI)

SRNA\_AG01\_SoLexa\_Mi2008\_1\_36323\_hit13

5' UGAGGAUGAUGAUGAUGAUGA  
||| |||||||||||||||||  
ACUACUACUACUACUACUACU 5'

AT1G14920.1 199 219  
signal response protein (GAI)

SRNA\_AG01\_SoLexa\_Mi2008\_1\_3079\_hit472

5' AUGAUGAUGAUGAUGAUGAUGA  
||| |||||||||||||||||  
AACUACUACUACUACUACUACU 5'

AT1G14920.1 199 220  
signal response protein (GAI)

SRNA\_AG01\_SoLexa\_Mi2008\_1\_45039\_hit3

5' UGUGAUGAUGAUGAUGAUGAUGA  
: ||| |||||||||||||||||  
GAACUACUACUACUACUACUACU 5'

AT1G14920.1 199 221  
signal response protein (GAI)

SRNA\_AG01\_SoLexa\_Mi2008\_1\_56092\_hit3

5' UUUG-UGAUGAUGAUGAUGAUGA  
||| |||||||||||||||||  
CAACUACUACUACUACUACUACU 5'

AT1G14920.1 200 222  
signal response protein (GAI)

SRNA\_AG01\_SoLexa\_Mi2008\_7\_3078\_hit1

5' AUGAUGAUGA-GAAUGAUGAU  
||| ||||||||| || |||||||||  
UACUACUACUACU-ACUACUA 5'

leaves\_1sup\_AG01\_SoLexa\_Mi\_Cell\_2008\_hit\_target\_site.txt

AT1G14920.1 202 221  
signal response protein (GAI)

SRNA\_AG01\_SoLexa\_Mi2008\_1\_13731\_hit1

5' GACGAAGAAGCCGAAUCGA  
|||||  
CUGCUUCUUCGGCUUAGCU 5'

AT1G14920.1 534 552  
signal response protein (GAI)

SRNA\_AG01\_SoLexa\_Mi2008\_2\_30679\_hit3

5' UCGAGACGGGCAA-GCUGACGA  
||||| || |||||  
AGCUCUGCCC-UUGCACUGCU 5'

AT1G15010.1 349 369  
unknown protein

SRNA\_AG01\_SoLexa\_Mi2008\_4\_14108\_hit2

5' GAGGUAAA-GAUGAAAAGGA  
|:||||| |||||  
AUUCAUUUUCUACUUUUCU 5'

AT1G15125.1 124 143  
putative protein

SRNA\_AG01\_SoLexa\_Mi2008\_4\_4868\_hit1

5' CAAG-GGAGCUUGGAUGAUGA  
|||| || |||||  
GUUCUCC-CGAACCUACUACU 5'

AT1G15125.1 194 213  
putative protein

SRNA\_AG01\_SoLexa\_Mi2008\_4\_4953\_hit1

5' CAAGGUUGAGGUUCCAAAUAG  
||| |||||:|||||  
AUUC-AACUCUAAGGUUUUAUC 5'

AT1G15670.1 1501 1520  
unknown protein

SRNA\_AG01\_SoLexa\_Mi2008\_3\_53982\_hit1

5' UUUAAAGGU-GGAAAGUUGAGAUCC  
||||| | |||||  
AAAUUC-AUCCUUUCAACUCUAAGG 5'

AT1G15670.1 1507 1530  
unknown protein

SRNA\_AG01\_SoLexa\_Mi2008\_8\_54395\_hit3

5' UUUAGGGU-GGAAAGUUGAGAUCC  
||||:| | |||||  
AAAUUC-AUCCUUUCAACUCUAAGG 5'

AT1G15670.1 1507 1530  
unknown protein

SRNA\_AG01\_SoLexa\_Mi2008\_1\_18369\_hit1

5' UAAGGU-GGAAAGUUGAGAUU  
|||| | |||||  
AUUC-AUCCUUUCAACUCUAA 5'

AT1G15670.1 1509 1528  
unknown protein

SRNA\_AG01\_SoLexa\_Mi2008\_4\_25271\_hit1

5' UAUGAAUGAGAUGAUG-GAUGAA  
||||| ||||| || |||  
AUACUUACUCCACUACUCU-CUU 5'

AT1G15670.1 77 98  
unknown protein

SRNA\_AG01\_SoLexa\_Mi2008\_1\_25270\_hit1

5' UAUGAAUGAGAUGAUG-GAUGA  
|||||  
AUACUUACUCCACUACUCU-CU 5'

AT1G15670.1 78 98  
unknown protein

SRNA\_AG01\_SoLexa\_Mi2008\_1\_17808\_hit1

5' UAAGACCGG-AGCAGCGGAAAG  
:|||||  
GUUCUG-CCGUCGUCGCCUUUC 5'

AT1G15930.2 34 54  
unknown protein

SRNA\_AG01\_SoLexa\_Mi2008\_3\_36272\_hit2

5' UGAGGAGACACCGGUGCCA-AAA  
|||||  
ACUCCUCUGUGGCCAC-GUCUUU 5'

AT1G16010.1 1189 1210  
unknown protein

SRNA\_AG01\_SoLexa\_Mi2008\_4\_36271\_hit2

5' UGAGGAGACACCGGUGCCA-AA  
|||||  
ACUCCUCUGUGGCCAC-GUCUU 5'

AT1G16010.1 1190 1210  
unknown protein

SRNA\_AG01\_SoLexa\_Mi2008\_3\_36272\_hit2

5' UGAGGAGACACCGGUGCCA-AAA  
|||||  
ACUCCUCUGUGGCCAC-GUCUUU 5'

AT1G16010.2 1278 1299  
unknown protein

SRNA\_AG01\_SoLexa\_Mi2008\_4\_36271\_hit2

5' UGAGGAGACACCGGUGCCA-AA  
|||||  
ACUCCUCUGUGGCCAC-GUCUU 5'

AT1G16010.2 1279 1299  
unknown protein

SRNA\_AG01\_SoLexa\_Mi2008\_3\_354\_hit1

5' AAAGAAGAAGAUGAUGAGCGU  
|||||  
GUUCUUCUUCUUCUACUC-CA 5'

AT1G17140.2 138 157  
unknown protein

SRNA\_AG01\_SoLexa\_Mi2008\_3\_354\_hit1

5' AAAGAAGAAGAUGAUGAGCGU  
|||||  
GUUCUUCUUCUUCUACUC-CA 5'

AT1G17140.1 176 195  
unknown protein

SRNA\_AG01\_SoLexa\_Mi2008\_3\_768\_hit1

5' AAGAAGAGAGAGA-AUUGAG  
|||||  
UUCUUCUCUCUCUAUCUC 5'

leaves\_1sup\_AG01\_SoLexa\_Mi\_Cell\_2008\_hit\_target\_site.txt

AT1G17140.1 17 36  
unknown protein

SRNA\_AG01\_SoLexa\_Mi2008\_1\_55885\_hit1  
5' UUUGGGUUGGCUGAUUUUCGAGU  
| | | | | | | | | | | | | | | |  
AAACGCAACCGACUAACA-CUCA 5'  
AT1G17140.1 91 112  
unknown protein

SRNA\_AG01\_SoLexa\_Mi2008\_2\_39987\_hit1  
5' UGGACCAUGAGGAUGGAGGCU  
| | | | | | | | | | | | | | | |  
ACCUGGUACCCUCCCUCGGA 5'  
AT1G17420.1 1694 1714  
lipoxygenase

SRNA\_AG01\_SoLexa\_Mi2008\_5\_47646\_hit1  
5' UUAGCUUGGAUUGGUUAGGUUG  
| | | | | | | | | | | | | | | |  
AAU-GAACCUAACCAAUUCAAG 5'  
AT1G17500.1 1032 1052  
P-type ATPase, putative

SRNA\_AG01\_SoLexa\_Mi2008\_5\_39580\_hit1  
5' UGGAAAGAAAGUGAUA-AUUUU  
| | | | | | | | | | | | | | | |  
ACCUUUCUCCACUAGUUUAAACA 5'  
AT1G17500.1 203 225  
P-type ATPase, putative

SRNA\_AG01\_SoLexa\_Mi2008\_1\_29728\_hit1  
5' UC-CCGACACAUGCGAUUUGCA  
| | | | | | | | | | | | | | | |  
AGUGGCAGU-UACGCUAAACGU 5'  
AT1G17500.1 3179 3199  
P-type ATPase, putative

SRNA\_AG01\_SoLexa\_Mi2008\_1\_34544\_hit1  
5' UGAAGACGAAGAUGAUGAUGA-UA  
| | | | | | | | | | | | | | | |  
ACUUCUUCUUCUGCUACUACUUAU 5'  
AT1G17615.1 4 27

SRNA\_AG01\_SoLexa\_Mi2008\_1\_29151\_hit1  
5' UCAUUUGUAUAAGAAAGCUAAUU  
| | | | | | | | | | | | | | | |  
AG-AAACAU-UUCUUUCGAUAC 5'  
AT1G17615.1 90 110

SRNA\_AG01\_SoLexa\_Mi2008\_1\_7085\_hit1  
5' CAUCUCUCAGACGCUUUUAU  
| | | | | | | | | | | | | | | |  
GUAG-GAGUCUGCGAAAGC 5'  
AT1G18160.1 2764 2781  
MAP kinase, putative

SRNA\_AG01\_SoLexa\_Mi2008\_2\_35255\_hit21  
5' UGACAGAGAGGUAUGAGCUUA  
| | | | | | | | | | | | | | | |  
ACU-UCUCUCAUACACGAAU 5'  
AT1G18160.1 2924 2943  
MAP kinase, putative

leaves\_1sup\_AG01\_SoLexa\_Mi\_Cell\_2008\_hit\_target\_site.txt

SRNA\_AG01\_SoLexa\_Mi2008\_10\_30419\_hit1  
 5' UCGAACGCUUCACGGAUCUCUA  
 ||||| || |||||  
 AGCUUUCGAGUGCCUAGAGAC 5'  
 AT1G18210.2 314 335  
 unknown protein

SRNA\_AG01\_SoLexa\_Mi2008\_1\_14930\_hit1  
 5' GGAUUGAAGGGAGCUCUAC  
 ||||| |||||  
 GGUAACUACCCUCGAGAUG 5'  
 AT1G18250.2 130 148  
 putative protein

SRNA\_AG01\_SoLexa\_Mi2008\_1\_14930\_hit1  
 5' GGAUUGAAGGGAGCUCUAC  
 ||||| |||||  
 GGUAACUACCCUCGAGAUG 5'  
 AT1G18250.1 25 43  
 putative protein

SRNA\_AG01\_SoLexa\_Mi2008\_1\_40\_hit1  
 5' AAAAAACACAACACAAAAAU  
 ||||| | |||||:  
 UUUUUU-U-UUGUGUUUUUG 5'  
 AT1G18570.1 1571 1588  
 unknown protein

SRNA\_AG01\_SoLexa\_Mi2008\_1\_40\_hit1  
 5' AAAAAACACAACACAAAAAU  
 ||||| |||||  
 UUUUUUGUGUU-U-UUUUUU 5'  
 AT1G18570.1 264 281  
 unknown protein

SRNA\_AG01\_SoLexa\_Mi2008\_1\_35874\_hit2  
 5' UGAGAGACA-AAAUGAGAAGGU  
 ||||| |||||  
 ACUCUCUGUGUUU-CUCUCCA 5'  
 AT1G18570.1 48 68  
 unknown protein

SRNA\_AG01\_SoLexa\_Mi2008\_4\_42709\_hit1  
 5' UGGGUGAUGAUGAUGAUUGAU  
 |:|||||  
 UCUCACUACUACUACUAACUA 5'  
 AT1G18740.1 0 20  
 unknown protein

SRNA\_AG01\_SoLexa\_Mi2008\_1\_36884\_hit32  
 5' UGAGUUGAUGAGUCAU-UUGGU  
 ||||| |||||  
 ACUCAACUACUCAGUUGAACCA 5'  
 AT1G18740.1 190 211  
 unknown protein

SRNA\_AG01\_SoLexa\_Mi2008\_1\_21856\_hit3  
 5' UAGAUGGGAUCUCUCUGAUG  
 ||||| |||||  
 AUCUACCCUUAGAGAGACUAC 5'  
 AT1G18740.1 1939 1959  
 unknown protein

leaves\_1sup\_AG01\_SoLexa\_Mi\_Cell\_2008\_hit\_target\_site.txt

SRNA\_AG01\_SoLexa\_Mi2008\_3\_37174\_hit2

5' UGAUGACUAAUGUCUAGAUGG  
|||||  
ACUACUGAUUACAGAUCUACC 5'  
AT1G18740.1 1953 1973  
unknown protein

SRNA\_AG01\_SoLexa\_Mi2008\_1\_21856\_hit3

5' UAGAUGGGAAUCUCUCUGAUG  
|||||  
AUCUACCCUUAGAGAGACUAC 5'  
AT1G18740.1 2102 2122  
unknown protein

SRNA\_AG01\_SoLexa\_Mi2008\_3\_37174\_hit2

5' UGAUGACUAAUGUCUAGAUGG  
|||||  
ACUACUGAUUACAGAUCUACC 5'  
AT1G18740.1 2116 2136  
unknown protein

SRNA\_AG01\_SoLexa\_Mi2008\_1\_37815\_hit1

5' UGCAAGUGAUGAUAAAAAGA  
|||||  
ACGUUCACUACUACUUUCU 5'  
AT1G18740.1 2173 2192  
unknown protein

SRNA\_AG01\_SoLexa\_Mi2008\_1\_80\_hit1

5' AAAAAAUAACUCUGAGGCA  
|||||  
UUUUUUAGUUGAGACUCCGU 5'  
AT1G18740.1 2310 2329  
unknown protein

SRNA\_AG01\_SoLexa\_Mi2008\_1\_33\_hit1

5' AAAAAAUAACUCUGAGGCA  
|||||  
UUUUUUUAGUUGAGACUCCGU 5'  
AT1G18740.1 2310 2330  
unknown protein

SRNA\_AG01\_SoLexa\_Mi2008\_1\_13420\_hit2

5' GAAGAAGAAGAAGACUCUU  
|| |||||  
AUU-UUCUUCUUCUGA-AA 5'  
AT1G18740.1 45 61  
unknown protein

SRNA\_AG01\_SoLexa\_Mi2008\_1\_50511\_hit7

5' UUGAGAGACAGGGAAGAUGAUGAU  
||||| || || |||||  
AACUCUCUCACUACUACUACUA 5'  
AT1G18740.1 4 27  
unknown protein

SRNA\_AG01\_SoLexa\_Mi2008\_2\_50515\_hit4

5' UUGAGAGAUAGGGAAGAUGAUGAU  
||||| || || |||||  
AACUCUCUCACUACUACUACUA 5'  
AT1G18740.1 4 27  
unknown protein

leaves\_1sup\_AG01\_SoLexa\_Mi\_Cell\_2008\_hit\_target\_site.txt

SRNA\_AG01\_SoLexa\_Mi2008\_1\_11343\_hit1

5' CUGAAAUUACAAAUAACAAAUU  
|||:| |||  
GACUUUGAUCUUUUUAUGUUUAC 5'  
AT1G18850.1 1397 1418  
unknown protein

SRNA\_AG01\_SoLexa\_Mi2008\_4\_14108\_hit2

5' GAGGUAAGAUGAAAAGGA  
|||  
GUCCAUUCUACUUUCGA 5'  
AT1G18850.1 3 21  
unknown protein

SRNA\_AG01\_SoLexa\_Mi2008\_1\_7584\_hit16

5' CCA-AAUGCAGAAACCCAUCUU  
||| ||| |||  
GGUAAUAGGUCUUUGGGUA-AA 5'  
AT1G18890.1 1474 1494  
calcium-dependent protein kinase (ATCDPK1)

SRNA\_AG01\_SoLexa\_Mi2008\_3\_29603\_hit1

5' UCCAUUUGGGUGACACAUCAUC  
||| ||| :|||  
AGGUAUCUCACUGUGUAGUAG 5'  
AT1G18890.1 750 771  
calcium-dependent protein kinase (ATCDPK1)

SRNA\_AG01\_SoLexa\_Mi2008\_1\_18115\_hit1

5' UAAGGAAGAGAGAUUGGUGAGGU  
: ||| |||  
GUUC-UUCUCUCUACCACUCCC 5'  
AT1G19025.1 234 254  
unknown protein

SRNA\_AG01\_SoLexa\_Mi2008\_4\_3848\_hit1

5' CAAAAAAGAGAGCAGAUUGUG  
|||  
AUUUUUUCUCUCGUCUAACCA 5'  
AT1G19050.1 65 85  
putative protein

SRNA\_AG01\_SoLexa\_Mi2008\_1\_42552\_hit1

5' UGGGGUUGGUUGG-UUGGUUGG  
||| |||  
ACCCAACCAACCAACCAACG 5'  
AT1G19180.1 27 48  
unknown protein

SRNA\_AG01\_SoLexa\_Mi2008\_1\_42552\_hit1

5' UGGGGUUGGUUGG-UUGGUUGG  
||| |||  
ACCCAACCAACCAACCAACG 5'  
AT1G19180.2 7 28  
unknown protein

SRNA\_AG01\_SoLexa\_Mi2008\_1\_34362\_hit1

5' UGAACAGUUGAUGAUAC-AAU  
||| ||| :  
ACUUGUCUACUACUUGAUUG 5'  
AT1G19440.1 397 417  
very-long-chain fatty acid condensing enzyme CUT1 like protein

leaves\_1sup\_AG01\_SoLexa\_Mi\_Cell\_2008\_hit\_target\_site.txt

SRNA\_AG01\_SoLexa\_Mi2008\_4\_1061\_hit1

```
5' AAUGAACAGUUGAUGAUAC
   ||||| |||||
   CGACUUGUCUACUACUAUG 5'
AT1G19440.1    400    418
```

very-long-chain fatty acid condensing enzyme CUT1 like protein

SRNA\_AG01\_SoLexa\_Mi2008\_1\_27730\_hit4

```
5' UCACCCUUCUUCGCCAUGGCC
   ||| ||| |||||
   AGUUGGA-GAAGCGGUACCGG 5'
AT1G19715.1    1359   1378
```

SRNA\_AG01\_SoLexa\_Mi2008\_1\_27730\_hit4

```
5' UCACCCUUCUUCGCCAUGGCC
   ||| ||| |||||
   AGUUGGA-GAAGCGGUACCGG 5'
AT1G19715.2    1390   1409
```

SRNA\_AG01\_SoLexa\_Mi2008\_2\_21996\_hit1

```
5' UAGCAACA-UUGGAUCUUUCUU
   | |||| | |||||
   AGCGUU-UCAACCUAGAAAGAA 5'
AT1G19715.1    696    716
```

SRNA\_AG01\_SoLexa\_Mi2008\_2\_21996\_hit1

```
5' UAGCAACA-UUGGAUCUUUCUU
   | |||| | |||||
   AGCGUU-UCAACCUAGAAAGAA 5'
AT1G19715.2    727    747
```

SRNA\_AG01\_SoLexa\_Mi2008\_3\_2080\_hit1

```
5' AGCGAUGAUGAC-AAUGAUGA
   ||||| || |||||
   ACGCUACUACUGCUU-CUACU 5'
AT1G19770.1    237    256
```

unknown protein

SRNA\_AG01\_SoLexa\_Mi2008\_1\_23826\_hit1

```
5' UAGUGAAGAAGAGCUAUGCAUG
   :||| ||||| ||| ||
   GUCACUUCUUCUCGACACG-AC 5'
AT1G19770.1    582    602
```

unknown protein

SRNA\_AG01\_SoLexa\_Mi2008\_1\_13420\_hit2

```
5' GAAGAAGAAGAAGACUCUU
   ||||| ||||| |||:
   CUUCUUCUUCUUCAGAGGC 5'
AT1G20350.1    529    547
```

unknown protein

SRNA\_AG01\_SoLexa\_Mi2008\_17\_5534\_hit1

```
5' CACCGUGCGCCGUCGACGC
   |||| |||||
   UGGGCA-GCGGCAGCUGCG 5'
AT1G20480.1    58    75
```

unknown protein

SRNA\_AG01\_SoLexa\_Mi2008\_1\_14334\_hit2

```
5' GAUGGUGAGGGACGACGAU-UU
   ||||| || ||| ||
```

leaves\_1sup\_AG01\_SoLexa\_Mi\_Cell\_2008\_hit\_target\_site.txt

CUACCACUCCUUCU-CUACAA 5'  
AT1G20620.4 155 175  
unknown protein

SRNA\_AG01\_SoLexa\_Mi2008\_1\_14334\_hit2  
5' GAUGGUGAGGGACGACGAU-UU  
|||||  
CUACCACUCCUUCU-CUACAA 5'  
AT1G20620.5 157 177  
unknown protein

SRNA\_AG01\_SoLexa\_Mi2008\_7\_6425\_hit1  
5' CAGGAAGGAAACAAUAGAG  
|||||  
AUCCUCCUUUGU-A-CUC 5'  
AT1G20620.5 1681 1697  
unknown protein

SRNA\_AG01\_SoLexa\_Mi2008\_7\_6425\_hit1  
5' CAGGAAGGAAACAAUAGAG  
|||||  
AUCCUCCUUUG-UA-CUC 5'  
AT1G20620.4 1700 1716  
unknown protein

SRNA\_AG01\_SoLexa\_Mi2008\_7\_6425\_hit1  
5' CAGGAAGGAAACAAUAGAG  
|||||  
AUCCUCCUUUG-UA-CUC 5'  
AT1G20620.1 1702 1718  
unknown protein

SRNA\_AG01\_SoLexa\_Mi2008\_7\_6425\_hit1  
5' CAGGAAGGAAACAAUAGAG  
|||||  
AUCCUCCUUUGU-A-CUC 5'  
AT1G20620.2 1801 1817  
unknown protein

SRNA\_AG01\_SoLexa\_Mi2008\_1\_8041\_hit2  
5' CCGGAGACGGAGUG-UGGGC  
|||||  
GGCCUCUGCCUCACAACCUA 5'  
AT1G20823.1 113 132  
ring-H2 finger like protein

SRNA\_AG01\_SoLexa\_Mi2008\_9\_7942\_hit2  
5' CCCGGAGACGGAGUG-UGGG  
|||||  
GGGCCUCUGCCUCACAACCU 5'  
AT1G20823.1 114 133  
ring-H2 finger like protein

SRNA\_AG01\_SoLexa\_Mi2008\_5\_13314\_hit2  
5' GAAAAAUGGAAGAUGGCUU  
|||||  
CUUUUUACCUUCUCC-AA 5'  
AT1G20823.1 17 34  
ring-H2 finger like protein

SRNA\_AG01\_SoLexa\_Mi2008\_1\_43389\_hit1  
5' UGGUGAUGGUUGUUGGUGUC  
|||||

leaves\_1sup\_AG01\_SoLexa\_Mi\_Cell\_2008\_hit\_target\_site.txt

ACCA-UACCAACAACAACCAU 5'  
 AT1G21050.1 241 260  
 unknown protein

SRNA\_AG01\_SoLexa\_Mi2008\_11\_43802\_hit1  
 5' UGGU-UGAUGAUGAAGAUGAGGA  
 ||||| ||| |||||:|||||  
 ACCAGACUCCUACUUCUGCUCCU 5'  
 AT1G21050.1 292 314  
 unknown protein

SRNA\_AG01\_SoLexa\_Mi2008\_1\_36931\_hit2  
 5' UGAUAACCGUAGA-GCCGAUGG  
 ||||| ||| |||||  
 ACUAUUGGC-UCUUCGGCUACC 5'  
 AT1G21270.1 1076 1096  
 putative protein

SRNA\_AG01\_SoLexa\_Mi2008\_2\_35299\_hit10  
 5' UGACAUCAACAUUUAAUGGCC  
 ||||| ||||| |||||  
 ACUGUAGUUGUAAACUACCGG 5'  
 AT1G21270.1 1213 1233  
 putative protein

SRNA\_AG01\_SoLexa\_Mi2008\_3\_11843\_hit2  
 5' CUGCUUCGGGUCCU-UAUG-GG  
 ||||| ||||| |||||  
 AACGAAGCCCAAGGAUUAUACUCC 5'  
 AT1G21450.1 291 313  
 scarecrow-like 1 (SCL1)

SRNA\_AG01\_SoLexa\_Mi2008\_1\_45157\_hit2  
 5' UGUGCCAUGGAUUGUCUCUU  
 ||||| ||||| :  
 ACACGGUAAACUAACACGAGUG 5'  
 AT1G21460.1 284 304

SRNA\_AG01\_SoLexa\_Mi2008\_1\_45156\_hit2  
 5' UGUGCCAUGGAUUGUCUC  
 ||||| |||||  
 ACACGGUAAACUAACACGAG 5'  
 AT1G21460.1 286 304

SRNA\_AG01\_SoLexa\_Mi2008\_1\_36898\_hit1  
 5' UGAGU-UGGAUGAUGAUGAUGA  
 :||| ||||| |||||  
 GCUCAGACCUACUACUACU-CU 5'  
 AT1G21750.2 1041 1061  
 putative disulfide isomerase

SRNA\_AG01\_SoLexa\_Mi2008\_1\_36898\_hit1  
 5' UGAGU-UGGAUGAUGAUGAUGA  
 :||| ||||| |||||  
 GCUCAGACCUACUACUACU-CU 5'  
 AT1G21750.1 1042 1062  
 putative disulfide isomerase

SRNA\_AG01\_SoLexa\_Mi2008\_3\_13421\_hit1  
 5' GAAGAAGAAGAUGAUGUUGAU  
 ||||| ||||| |||||  
 CUUCUUCUUCUUCUACCACUA 5'  
 AT1G21910.1 181 201

TINY like protein

SRNA\_AG01\_SoLexa\_Mi2008\_6\_14255\_hit369

5' GAUGAUGAUGAUGAUGAUGAUGAU  
 |||:| |  
 CUACUACUACUACUUCUGCUUCUA 5'  
 AT1G22850.1 15 38  
 unknown protein

SRNA\_AG01\_SoLexa\_Mi2008\_1\_37225\_hit4

5' UGAUGAUGAUGAUGAUGAAGAAG  
 ||| |  
 UCUACUACUACUACUUCUGCUUC 5'  
 AT1G22850.1 17 39  
 unknown protein

SRNA\_AG01\_SoLexa\_Mi2008\_1\_7931\_hit2

5' CCCGAUGAUGAUGAUG-AGAC  
 || |  
 GGACUACUACUACUUCUG 5'  
 AT1G22850.1 22 42  
 unknown protein

SRNA\_AG01\_SoLexa\_Mi2008\_1\_13759\_hit1

5' GACGAUGAUGAUGAUGACA  
 || |  
 CU-CUACUACUACUACUUC 5'  
 AT1G22850.1 24 41  
 unknown protein

SRNA\_AG01\_SoLexa\_Mi2008\_5\_13760\_hit2

5' GACGAUGAUGAUGAUGAGC  
 || |:  
 CU-CUACUACUACUACUUC 5'  
 AT1G22850.1 24 41  
 unknown protein

SRNA\_AG01\_SoLexa\_Mi2008\_1\_2280\_hit1

5' AGUGGAUGAUGAUGAUGAUG  
 ||| |  
 AAACCU-CUACUACUACUAC 5'  
 AT1G22850.1 27 45  
 unknown protein

SRNA\_AG01\_SoLexa\_Mi2008\_1\_56259\_hit1

5' UUUUAAGGCACUUUCAGGGAUG  
 ||| |  
 AAAAUUCCG--AAAAGUCCCUAG 5'  
 AT1G23280.1 1009 1029  
 mak16-like protein-related

SRNA\_AG01\_SoLexa\_Mi2008\_12\_5493\_hit2

5' CACCCAUUUGAUACAUAGU  
 ||| |  
 GUGGGUAAACUA-GUAUAA 5'  
 AT1G23850.1 1142 1159  
 unknown protein

SRNA\_AG01\_SoLexa\_Mi2008\_1\_55587\_hit1

5' UUUGGAGUGAAAGGU-GAAGAU  
 ||| |  
 AAACCUACUUUCGAGCUUCU 5'  
 AT1G23850.1 317 338

unknown protein

SRNA\_AG01\_SoLexa\_Mi2008\_1\_7688\_hit1

5' CCACCACCACCUCCAGCG-CCAC  
|||||  
GGUGGUGGUGGAGGU-GCUGGAG 5'

AT1G23860.2 298 319  
9G8-like splicing factor / SRZ-21

SRNA\_AG01\_SoLexa\_Mi2008\_1\_7688\_hit1

5' CCACCACCACCUCCAGCG-CCAC  
|||||  
GGUGGUGGUGGAGGU-GCUGGAG 5'

AT1G23860.1 300 321  
9G8-like splicing factor / SRZ-21

SRNA\_AG01\_SoLexa\_Mi2008\_1\_7688\_hit1

5' CCACCACCACCUCCAGCG-CCAC  
|||||  
GGUGGUGGUGGAGGU-GCUGGAG 5'

AT1G23860.3 303 324  
9G8-like splicing factor / SRZ-21

SRNA\_AG01\_SoLexa\_Mi2008\_1\_35588\_hit10

5' UGACGGUUACCAGGCUAUUAC  
||| |||||  
ACUUCCAAUGGUCCG-UAAUA 5'

AT1G24090.1 1162 1181  
unknown protein

SRNA\_AG01\_SoLexa\_Mi2008\_1\_3079\_hit472

5' AUGAUGAUGAUGAUGAUGAUGA  
||||| ||||| |||||  
UACUACUAAUACUACAACUACC 5'

AT1G24575.1 89 110  
unknown protein

SRNA\_AG01\_SoLexa\_Mi2008\_1\_3079\_hit472

5' AUGAUGAUGAUGAUGAUGAUGA  
||||| ||||| |||||  
CACUACUACUAAUACUACAACU 5'

AT1G24575.1 92 113  
unknown protein

SRNA\_AG01\_SoLexa\_Mi2008\_1\_45039\_hit3

5' UGUGAUGAUGAUGAUGAUGAUGA  
||||| ||||| |||||  
CCACUACUACUAAUACUACAACU 5'

AT1G24575.1 92 114  
unknown protein

SRNA\_AG01\_SoLexa\_Mi2008\_2\_36760\_hit1

5' UGA-GUCCAUGUGUCGUUCCGGU  
||| ||||| |||||  
ACUACAGGUACAGAGCAAGGCCA 5'

AT1G25440.1 1130 1152  
unknown protein

SRNA\_AG01\_SoLexa\_Mi2008\_1\_36759\_hit1

5' UGA-GUCCAUGUGUCGUUCCGG  
||| ||||| |||||  
ACUACAGGUACAGAGCAAGGCC 5'

AT1G25440.1 1131 1152

unknown protein

SRNA\_AG01\_SoLexa\_Mi2008\_1\_36838\_hit1

5' UGAGUGGUUGCUAUGCUUUAC  
|||||  
ACUCACCAACGAUACGAAAUG 5'  
AT1G25440.1 374 394

unknown protein

SRNA\_AG01\_SoLexa\_Mi2008\_714\_35241\_hit6

5' UGACAGAAGAGAGUGAG-CACA  
||| |||||  
ACUCUCUUCUCUCACUCCGUUU 5'  
AT1G25500.3 2 23

unknown protein

SRNA\_AG01\_SoLexa\_Mi2008\_2091\_35240\_hit6

5' UGACAGAAGAGAGUGAG-CAC  
||| |||||  
ACUCUCUUCUCUCACUCCGUU 5'  
AT1G25500.3 3 23

unknown protein

SRNA\_AG01\_SoLexa\_Mi2008\_1778\_50260\_hit1

5' UUGACAGAAGAGAGUGAG-CAC  
|||| |||||  
AACUCUCUUCUCUCACUCCGUU 5'  
AT1G25500.3 3 24

unknown protein

SRNA\_AG01\_SoLexa\_Mi2008\_30\_35239\_hit6

5' UGACAGAAGAGAGUGAG-CA  
||| |||||  
ACUCUCUUCUCUCACUCCGU 5'  
AT1G25500.3 4 23

unknown protein

SRNA\_AG01\_SoLexa\_Mi2008\_1\_11426\_hit3

5' CUGACAGAAGAGAGUGAG-CA  
||| |||||  
AACUCUCUUCUCUCACUCCGU 5'  
AT1G25500.3 4 24

unknown protein

SRNA\_AG01\_SoLexa\_Mi2008\_16\_50259\_hit1

5' UUGACAGAAGAGAGUGAG-CA  
|||| |||||  
AACUCUCUUCUCUCACUCCGU 5'  
AT1G25500.3 4 24

unknown protein

SRNA\_AG01\_SoLexa\_Mi2008\_1\_50258\_hit1

5' UUGACAGAAGAGAGUGAGC  
||| |||||  
UACUCUCUUCUCUCACUCC 5'  
AT1G25500.3 5 23

unknown protein

SRNA\_AG01\_SoLexa\_Mi2008\_1\_50864\_hit1

5' UUGAGGUUGCCUCUGUAA-CAA  
||||| |||||  
AACUCCAACAGAGACAUUAGUU 5'  
AT1G26560.1 1589 1610

beta-glucosidase like protein

SRNA\_AG01\_SoLexa\_Mi2008\_1\_32987\_hit1

5' UCUAUCAAAAGGUGGG-U-UGGU  
 | |||||  
 AAAUAGUUUCCACCCUAGACCA 5'  
 AT1G27980.1 1058 1080  
 unknown protein

SRNA\_AG01\_SoLexa\_Mi2008\_1\_50609\_hit1

5' UUGAGCGAGAAACAGAGAGAA  
 :|||  
 GACUCGCUCUUUGUCUCUCUG 5'  
 AT1G27980.1 186 206  
 unknown protein

SRNA\_AG01\_SoLexa\_Mi2008\_1\_40835\_hit1

5' UGGAUCAUCUCCUCGUGCA  
 |||||  
 UACUAGUAGAGGAGAACGU 5'  
 AT1G27990.1 416 434  
 hypothetical protein

SRNA\_AG01\_SoLexa\_Mi2008\_1\_34261\_hit1

5' UGA-A-AGUGGAAGAUAAAUA  
 ||| | |||||  
 ACUCUCACCCUUCUUAUUAU 5'  
 AT1G28110.2 102 122  
 serine carboxypeptidase II (At1g28110)

SRNA\_AG01\_SoLexa\_Mi2008\_2\_34881\_hit1

5' UGAAGUGAAGACGAGA-UAG-GAUGG  
 ||||| ||||| |||||  
 ACUUCACUUCUCCUCUGAUCACUACC 5'  
 AT1G28110.2 10 35  
 serine carboxypeptidase II (At1g28110)

SRNA\_AG01\_SoLexa\_Mi2008\_1\_43831\_hit1

5' UGGUUGUGGCUC-UGGUGGUAA  
 |||| ||||| | |||||  
 ACCACCACCG-GCACCACCAUU 5'  
 AT1G28290.2 158 178  
 proline-rich protein, putative

SRNA\_AG01\_SoLexa\_Mi2008\_1\_35934\_hit2

5' UGAG-AGUGAUGUGGGUGGUGGU  
 |||| || | |||||  
 ACUCCUCCC-ACACCCACCACCA 5'  
 AT1G28290.2 172 193  
 proline-rich protein, putative

SRNA\_AG01\_SoLexa\_Mi2008\_1\_43831\_hit1

5' UGGUUGUGGCUC-UGGUGGUAA  
 |||| ||||| | |||||  
 ACCACCACCG-GCACCACCAUU 5'  
 AT1G28290.1 276 296  
 proline-rich protein, putative

SRNA\_AG01\_SoLexa\_Mi2008\_1\_35934\_hit2

5' UGAG-AGUGAUGUGGGUGGUGGU  
 |||| || | |||||  
 ACUCCUCCC-ACACCCACCACCA 5'  
 AT1G28290.1 290 311

proline-rich protein, putative

SRNA\_AG01\_SoLexa\_Mi2008\_20\_49676\_hit3

```
5' UUCU-A-CCAUCCGAUCAACAAG
   ||| | |||
   AAGACUUGGUAGGCUAGUUGUUA 5'
AT1G28330.3 590 612
dormancy-associated protein
```

SRNA\_AG01\_SoLexa\_Mi2008\_2\_54961\_hit1

```
5' UUUCU-A-CCAUCCGAUCAACAA
   :||| | |||
   GAAGACUUGGUAGGCUAGUUGUU 5'
AT1G28330.3 591 613
dormancy-associated protein
```

SRNA\_AG01\_SoLexa\_Mi2008\_10\_54960\_hit1

```
5' UUUCU-A-CCAUCCGAUCAACA
   :||| | |||
   GAAGACUUGGUAGGCUAGUUGU 5'
AT1G28330.3 592 613
dormancy-associated protein
```

SRNA\_AG01\_SoLexa\_Mi2008\_1\_1776\_hit10

```
5' AGAAAAAAAAAAAAAAAAAAU
   | |||
   UGGUUUUUUUUUUUUUUUA 5'
AT1G28370.1 692 712
putative ethylene responsive element binding factor 4 protein
```

SRNA\_AG01\_SoLexa\_Mi2008\_1\_3\_hit25

```
5' AAAAAAAAAAAGAAAGA
   ||| |||
   UUUUUUUUUUUUU-UUUUA 5'
AT1G28370.1 693 710
putative ethylene responsive element binding factor 4 protein
```

SRNA\_AG01\_SoLexa\_Mi2008\_3\_8177\_hit1

```
5' CCUGA-UAAAGUAAAUCUCCAU
   ||| | ||| |||
   GGACUUUUUCAUAUAGAGGUA 5'
AT1G28370.1 950 972
putative ethylene responsive element binding factor 4 protein
```

SRNA\_AG01\_SoLexa\_Mi2008\_2\_40270\_hit1

```
5' UGGA-GAGCUAGAGUUGAUGGA
   ||| | |||
   ACCUUCUC-AUCUCAACUACCU 5'
AT1G28440.1 373 393
unknown protein
```

SRNA\_AG01\_SoLexa\_Mi2008\_1\_18621\_hit1

```
5' UAAUACUAAACAUUUCAUGG
   ||| | |||
   AUUA-GAUUUCUAUAAGUACC 5'
AT1G29330.1 205 224
ER lumen protein retaining receptor
```

SRNA\_AG01\_SoLexa\_Mi2008\_1\_3\_hit25

```
5' AAAAAAAAAA-AAAGAAAGA
   ||| |||
   UUUUUUUUUUUUU-UUUUCU 5'
AT1G30040.2 891 909
```

unknown protein

SRNA\_AG01\_SoLexa\_Mi2008\_9\_11228\_hit1  
5' CUCUCCUGCAGUAGAUUCGUC  
|||||  
GAGAGGACGUCAUCUAAGCAG 5'  
AT1G30330.2 1023 1043  
putative protein

SRNA\_AG01\_SoLexa\_Mi2008\_1\_39438\_hit1  
5' UGCUGUUGAGAGAUGAUGCUC  
|||||  
ACGACAACUCUCU-CGACGAC 5'  
AT1G30330.2 1555 1574  
putative protein

SRNA\_AG01\_SoLexa\_Mi2008\_9\_11228\_hit1  
5' CUCUCCUGCAGUAGAUUCGUC  
|||||  
GAGAGGACGUCAUCUAAGCAG 5'  
AT1G30330.1 1780 1800  
putative protein

SRNA\_AG01\_SoLexa\_Mi2008\_1\_39236\_hit1  
5' UGCUCCAUAACGGAUUGAGUG  
|||||  
ACGAGGUUAUGCCUAACUCAC 5'  
AT1G30330.2 2015 2035  
putative protein

SRNA\_AG01\_SoLexa\_Mi2008\_1\_39438\_hit1  
5' UGCUGUUGAGAGAUGAUGCUC  
|||||  
ACGACAACUCUCU-CGACGAC 5'  
AT1G30330.1 2312 2331  
putative protein

SRNA\_AG01\_SoLexa\_Mi2008\_4\_2102\_hit1  
5' AGCUGCCAGCAUGAUCUAU  
|||||  
UCGACGGUCGGACUAGAGU 5'  
AT1G30330.2 2518 2536  
putative protein

SRNA\_AG01\_SoLexa\_Mi2008\_13\_873\_hit2  
5' AAGCUGCCAGCAUGAUCUA  
|||||  
UUCGACGGUCGGACUAGAG 5'  
AT1G30330.2 2519 2537  
putative protein

SRNA\_AG01\_SoLexa\_Mi2008\_1\_874\_hit1  
5' AAGCUGCCAGCAUGAUCUG  
|||||  
UUCGACGGUCGGACUAGAG 5'  
AT1G30330.2 2519 2537  
putative protein

SRNA\_AG01\_SoLexa\_Mi2008\_1\_4776\_hit1  
5' CAAGCUGCCAGCCUGAUCUA  
|||||  
GUUCGACGGUCGGACUAGAG 5'  
AT1G30330.2 2519 2538

putative protein

SRNA\_AG01\_SoLexa\_Mi2008\_1519\_13483\_hit2

5' GAAGCUGCCAGCAUGAUCUA  
| | | | | | | | | | | | | | | | | | | |  
GUUCGACGGUCGGACUAGAG 5'  
AT1G30330.2 2519 2538  
putative protein

SRNA\_AG01\_SoLexa\_Mi2008\_3\_13485\_hit1

5' GAAGCUGCCAGCAUGAUCUG  
| | | | | | | | | | | | | | | | | | | |  
GUUCGACGGUCGGACUAGAG 5'  
AT1G30330.2 2519 2538  
putative protein

SRNA\_AG01\_SoLexa\_Mi2008\_54\_13482\_hit3

5' GAAGCUGCCAGCAUGAUCU  
| | | | | | | | | | | | | | | | | | | |  
GUUCGACGGUCGGACUAGA 5'  
AT1G30330.2 2520 2538  
putative protein

SRNA\_AG01\_SoLexa\_Mi2008\_7845\_34690\_hit3

5' UGAAGCUGCCAGCAUGAUCU  
| | | | | | | | | | | | | | | | | | | |  
UGUUCGACGGUCGGACUAGA 5'  
AT1G30330.2 2520 2539  
putative protein

SRNA\_AG01\_SoLexa\_Mi2008\_17\_46569\_hit1

5' UUAAGCUGCCAGCAUGAUCU  
: | | | | | | | | | | | | | | | | | | | |  
UGUUCGACGGUCGGACUAGA 5'  
AT1G30330.2 2520 2539  
putative protein

SRNA\_AG01\_SoLexa\_Mi2008\_6340\_34689\_hit3

5' UGAAGCUGCCAGCAUGAUC  
| | | | | | | | | | | | | | | | | | | |  
UGUUCGACGGUCGGACUAG 5'  
AT1G30330.2 2521 2539  
putative protein

SRNA\_AG01\_SoLexa\_Mi2008\_8\_46568\_hit1

5' UUAAGCUGCCAGCAUGAUC  
: | | | | | | | | | | | | | | | | | | | |  
UGUUCGACGGUCGGACUAG 5'  
AT1G30330.2 2521 2539  
putative protein

SRNA\_AG01\_SoLexa\_Mi2008\_1\_39236\_hit1

5' UGCUCCAAUACGGAUUGAGUG  
| | | | | | | | | | | | | | | | | | | |  
ACGAGGUUAUGCCUAACUCAC 5'  
AT1G30330.1 2772 2792  
putative protein

SRNA\_AG01\_SoLexa\_Mi2008\_2\_15965\_hit1

5' GUGGAUUUAUACAGUUUUUGU  
: | | | | | | | | | | | | | | | | | | | |  
UCCCUAAUAUAUCAAAAACA 5'  
AT1G30330.2 2950 2969

putative protein

SRNA\_AG01\_SoLexa\_Mi2008\_1\_351\_hit2

5' AAAGAAGAAAAACAGAUCU  
   ||| ||||| |||||  
   UUU-UUCUUUGUGUCUAGA 5'  
AT1G30330.1     325     342  
putative protein

SRNA\_AG01\_SoLexa\_Mi2008\_4\_2102\_hit1

5' AGCUGCCAGCAUGAUCUAU  
   ||||||| |||||  
   UCGACGGUCGGACUAGAGU 5'  
AT1G30330.1     3275     3293  
putative protein

SRNA\_AG01\_SoLexa\_Mi2008\_13\_873\_hit2

5' AAGCUGCCAGCAUGAUCUA  
   ||||||| |||||  
   UUCGACGGUCGGACUAGAG 5'  
AT1G30330.1     3276     3294  
putative protein

SRNA\_AG01\_SoLexa\_Mi2008\_1\_874\_hit1

5' AAGCUGCCAGCAUGAUCUG  
   ||||||| |||||  
   UUCGACGGUCGGACUAGAG 5'  
AT1G30330.1     3276     3294  
putative protein

SRNA\_AG01\_SoLexa\_Mi2008\_1\_4776\_hit1

5' CAAGCUGCCAGCCUGAUCUA  
   ||||||| |||||  
   GUUCGACGGUCGGACUAGAG 5'  
AT1G30330.1     3276     3295  
putative protein

SRNA\_AG01\_SoLexa\_Mi2008\_1519\_13483\_hit2

5' GAAGCUGCCAGCAUGAUCUA  
   ||||||| |||||  
   GUUCGACGGUCGGACUAGAG 5'  
AT1G30330.1     3276     3295  
putative protein

SRNA\_AG01\_SoLexa\_Mi2008\_3\_13485\_hit1

5' GAAGCUGCCAGCAUGAUCUG  
   ||||||| |||||  
   GUUCGACGGUCGGACUAGAG 5'  
AT1G30330.1     3276     3295  
putative protein

SRNA\_AG01\_SoLexa\_Mi2008\_54\_13482\_hit3

5' GAAGCUGCCAGCAUGAUCU  
   ||||||| |||||  
   GUUCGACGGUCGGACUAGA 5'  
AT1G30330.1     3277     3295  
putative protein

SRNA\_AG01\_SoLexa\_Mi2008\_7845\_34690\_hit3

5' UGAAGCUGCCAGCAUGAUCU  
   ||||||| |||||  
   UGUUCGACGGUCGGACUAGA 5'  
AT1G30330.1     3277     3296

putative protein

SRNA\_AG01\_SoLexa\_Mi2008\_17\_46569\_hit1

5' UUAAGCUGCCAGCAUGAUCU  
:||||||| |||||  
UGUUCGACGGUCGGACUAGA 5'  
AT1G30330.1 3277 3296  
putative protein

SRNA\_AG01\_SoLexa\_Mi2008\_6340\_34689\_hit3

5' UGAAGCUGCCAGCAUGAUC  
||||||| |||||  
UGUUCGACGGUCGGACUAG 5'  
AT1G30330.1 3278 3296  
putative protein

SRNA\_AG01\_SoLexa\_Mi2008\_8\_46568\_hit1

5' UUAAGCUGCCAGCAUGAUC  
:||||||| |||||  
UGUUCGACGGUCGGACUAG 5'  
AT1G30330.1 3278 3296  
putative protein

SRNA\_AG01\_SoLexa\_Mi2008\_2\_15965\_hit1

5' GUGGAUUUAUACAGUUUUUGU  
: ||||| |||||  
UCCCUAAUAUAUCAAAAACA 5'  
AT1G30330.1 3707 3726  
putative protein

SRNA\_AG01\_SoLexa\_Mi2008\_1\_9282\_hit3

5' CGGUUUUUUCGGGU-UUUUUC  
| ||||| ||||| |||||  
GACAAAAAA-CCCAAAAAAAG 5'  
AT1G30490.1 17 36  
HD-Zip protein

SRNA\_AG01\_SoLexa\_Mi2008\_1\_39355\_hit2

5' UGCUGAUGUG-UGGGCUUUUGG  
||||||| ||||| |||||  
ACGACUACACAACCC-AAAACG 5'  
AT1G30490.1 664 684  
HD-Zip protein

SRNA\_AG01\_SoLexa\_Mi2008\_2\_8957\_hit1

5' CGGACCAGGCUUCAUCCCCC  
||||||| |||||  
GCCUGGUCCGAAGUAGGGUUA 5'  
AT1G30490.1 793 813  
HD-Zip protein

SRNA\_AG01\_SoLexa\_Mi2008\_153\_14822\_hit2

5' GGACCAGGCUUCAUCCCCC  
||||||| |||||  
CCUGGUCCGAAGUAGGGUUA 5'  
AT1G30490.1 794 812  
HD-Zip protein

SRNA\_AG01\_SoLexa\_Mi2008\_219\_8956\_hit2

5' CGGACCAGGCUUCAUCCCCC  
||||||| |||||  
GCCUGGUCCGAAGUAGGGUUA 5'  
AT1G30490.1 794 813

HD-Zip protein

SRNA\_AG01\_SoLexa\_Mi2008\_1063\_31727\_hit2

5' UCGGACCAGGCUUCAUCCCC  
:|||||  
GGCCUGGUCCGAAGUAGGGU 5'  
AT1G30490.1 794 814

HD-Zip protein

SRNA\_AG01\_SoLexa\_Mi2008\_4\_8955\_hit2

5' CGGACCAGGCUUCAUCCCC  
|||||  
GCCUGGUCCGAAGUAGGGU 5'  
AT1G30490.1 795 813

HD-Zip protein

SRNA\_AG01\_SoLexa\_Mi2008\_8\_8960\_hit4

5' CGGACCAGGCUUCAUCCCC  
|||||  
GCCUGGUCCGAAGU-AGGGU 5'  
AT1G30490.1 795 814

HD-Zip protein

SRNA\_AG01\_SoLexa\_Mi2008\_47\_31726\_hit2

5' UCGGACCAGGCUUCAUCCCC  
:|||||  
GGCCUGGUCCGAAGUAGGGU 5'  
AT1G30490.1 795 814

HD-Zip protein

SRNA\_AG01\_SoLexa\_Mi2008\_310\_14823\_hit7

5' GGACCAGGCUUCAUCCCC  
|||||  
CCUGGUCCGAAGU-AGGGU 5'  
AT1G30490.1 796 813

HD-Zip protein

SRNA\_AG01\_SoLexa\_Mi2008\_641\_8959\_hit7

5' CGGACCAGGCUUCAUCCCC  
|||||  
GCCUGGUCCGAAGU-AGGGU 5'  
AT1G30490.1 796 814

HD-Zip protein

SRNA\_AG01\_SoLexa\_Mi2008\_2\_31725\_hit2

5' UCGGACCAGGCUUCAUCCC  
:|||||  
GGCCUGGUCCGAAGUAGGG 5'  
AT1G30490.1 796 814

HD-Zip protein

SRNA\_AG01\_SoLexa\_Mi2008\_4138\_31731\_hit7

5' UCGGACCAGGCUUCAUCCCC  
|||||  
CGCCUGGUCCGAAGU-AGGGU 5'  
AT1G30490.1 796 815

HD-Zip protein

SRNA\_AG01\_SoLexa\_Mi2008\_1\_8958\_hit7

5' CGGACCAGGCUUCAUCCC  
|||||  
GCCUGGUCCGAAGU-AGGG 5'  
AT1G30490.1 797 814

HD-Zip protein

SRNA\_AG01\_SoLexa\_Mi2008\_15\_11085\_hit1

5' CUCGGACCAGGCUUCAUCC  
:|||||  
AGGCCUGGUCCGAAGUAGG 5'  
AT1G30490.1 797 815  
HD-Zip protein

SRNA\_AG01\_SoLexa\_Mi2008\_98\_31730\_hit7

5' UCGGACCAGGCUUCAUCCC  
|||||  
CGCCUGGUCCGAAGU-AGGG 5'  
AT1G30490.1 797 815  
HD-Zip protein

SRNA\_AG01\_SoLexa\_Mi2008\_1\_11087\_hit3

5' CUCGGACCAGGCUUCAUCCC  
|||||  
UCGCCUGGUCCGAAGU-AGGG 5'  
AT1G30490.1 797 816  
HD-Zip protein

SRNA\_AG01\_SoLexa\_Mi2008\_33\_15725\_hit3

5' GUCGGACCAGGCUUCAUCCC  
:|||||  
UCGCCUGGUCCGAAGU-AGGG 5'  
AT1G30490.1 797 816  
HD-Zip protein

SRNA\_AG01\_SoLexa\_Mi2008\_68\_49390\_hit1

5' UUCGGACCAGGCUUCAUCCC  
|||||  
UCGCCUGGUCCGAAGU-AGGG 5'  
AT1G30490.1 797 816  
HD-Zip protein

SRNA\_AG01\_SoLexa\_Mi2008\_6\_31729\_hit7

5' UCGGACCAGGCUUCAUCC  
|||||  
CGCCUGGUCCGAAGU-AGG 5'  
AT1G30490.1 798 815  
HD-Zip protein

SRNA\_AG01\_SoLexa\_Mi2008\_1\_49389\_hit1

5' UUCGGACCAGGCUUCAUCC  
|||||  
UCGCCUGGUCCGAAGU-AGG 5'  
AT1G30490.1 798 816  
HD-Zip protein

SRNA\_AG01\_SoLexa\_Mi2008\_2\_49996\_hit1

5' UUGAACAGAGUGAACAAUUA  
|||||  
AACUUGUCUCAC--GUUUAAA 5'  
AT1G30680.1 1518 1536  
unknown protein

SRNA\_AG01\_SoLexa\_Mi2008\_1\_24435\_hit5

5' UAUAGAGAACCACCAUGAUUG  
|||||  
UUAUCUCUUUGUGGUACUAAG 5'  
AT1G30680.1 2394 2414

unknown protein

SRNA\_AG01\_SoLexa\_Mi2008\_1\_38600\_hit1

5' UGCCGCAACAAAAGGAUGGU  
|||||  
ACGGCGUUGUUUCCU-CCU 5'  
AT1G30680.1 2529 2547  
unknown protein

SRNA\_AG01\_SoLexa\_Mi2008\_1\_26531\_hit1

5' UAUUUUUGCAGAAAACUUUAU  
||||| || |||||  
AUAAAA-CGACUUUUGAAUUA 5'  
AT1G30730.1 1600 1620  
putative reticuline oxidase-like protein

SRNA\_AG01\_SoLexa\_Mi2008\_2\_45154\_hit1

5' UGUGCAUUUGGUGGUUUUC  
||||| |||||  
ACACG-AAACCACCACAAAAG 5'  
AT1G30755.1 1422 1441

SRNA\_AG01\_SoLexa\_Mi2008\_1\_52018\_hit20

5' UUGGACACUGAAGACGA-GUUG  
||||| ||:| |||||  
AACCUGUGACUU-UGUUACAAC 5'  
AT1G31910.1 2171 2191  
hypothetical protein

SRNA\_AG01\_SoLexa\_Mi2008\_9\_19222\_hit1

5' UACAAUGUUCUCAUCAGGUCU  
|||||  
AUGUUACAAGAGUAGUCCAGA 5'  
AT1G32120.1 1116 1136  
hypothetical protein

SRNA\_AG01\_SoLexa\_Mi2008\_1\_4815\_hit1

5' CAAGGACCGAAUGAUGAUGU-GA  
||||| ||||| ||||| ||  
GUUCCUGGCAUACUUCUACAGCU 5'  
AT1G33050.3 1176 1198  
unknown protein

SRNA\_AG01\_SoLexa\_Mi2008\_3\_53631\_hit1

5' UUGUGGGCGUCCUGAAGCUUUC  
|||||  
AACACCCGCAGGACUUCGAAAG 5'  
AT1G33420.1 1306 1327  
unknown protein

SRNA\_AG01\_SoLexa\_Mi2008\_1\_50005\_hit1

5' UUGAACCAGGAUUGCAACGUG  
|||||  
AACUUGGUCCUACGUUGCAC 5'  
AT1G33420.1 1455 1475  
unknown protein

SRNA\_AG01\_SoLexa\_Mi2008\_1\_8165\_hit1

5' CCUCGUGCAAGCCUAGUGUC  
|||||  
GGAGCACGUUCGAAUCACAG 5'  
AT1G33420.1 638 658  
unknown protein

leaves\_1sup\_AG01\_SoLexa\_Mi\_Cell\_2008\_hit\_target\_site.txt

SRNA\_AG01\_SoLexa\_Mi2008\_3\_35894\_hit1

5' UGAGAGCAGAGAAAGAGAGU  
 ||||||| ||||||||||||||  
 ACUCUC-UCUCUUUCUCUCU 5'  
 AT1G33700.2 22 40  
 unknown protein

SRNA\_AG01\_SoLexa\_Mi2008\_37\_6798\_hit10

5' CAUAAAAGAGGGAU-GCAAC  
 ||||||||||||| | |||||  
 GUAUUUUCUCCC-AGCGUUU 5'  
 AT1G33700.1 3016 3034  
 unknown protein

SRNA\_AG01\_SoLexa\_Mi2008\_37\_6798\_hit10

5' CAUAAAAGAGGGAU-GCAAC  
 ||||||||||||| | |||||  
 GUAUUUUCUCCC-AGCGUUU 5'  
 AT1G33700.2 3022 3040  
 unknown protein

SRNA\_AG01\_SoLexa\_Mi2008\_7\_55923\_hit1

5' UUUGGUCUUCAG-AAAGUUUUC  
 ||||||||||||| || |||||  
 AAACCAGAAGUCCUUGCAAAAAC 5'  
 AT1G33700.1 91 112  
 unknown protein

SRNA\_AG01\_SoLexa\_Mi2008\_2\_38645\_hit1

5' UGCCGUAACAUAACAGGUGGGU  
 ||| ||| | |||||||||||||  
 ACG-CAUCG-AUUGUCCACCCA 5'  
 AT1G33700.1 920 939  
 unknown protein

SRNA\_AG01\_SoLexa\_Mi2008\_2\_38645\_hit1

5' UGCCGUAACAUAACAGGUGGGU  
 ||| ||| | |||||||||||||  
 ACG-CAUCG-AUUGUCCACCCA 5'  
 AT1G33700.2 926 945  
 unknown protein

SRNA\_AG01\_SoLexa\_Mi2008\_7\_55923\_hit1

5' UUUGGUCUUCA-GAAAGUUUUC  
 ||||||||||||| ||| |||||  
 AAACCAGAAGUCCUUGCAAAAAC 5'  
 AT1G33700.2 97 118  
 unknown protein

SRNA\_AG01\_SoLexa\_Mi2008\_1\_45719\_hit1

5' UGUGUGUGUGUGUUGGUGUGU  
 ||||||||||||||||| |||||  
 ACACACACACACAA--ACACU 5'  
 AT1G33760.1 13 31  
 TINY-like protein

SRNA\_AG01\_SoLexa\_Mi2008\_1\_2738\_hit1

5' AUAUUCU-CAGAUCCGUUGGCCAU  
 ||||||| | |||||||||||||  
 CAUAGAAGACUAGCAACCGGUA 5'  
 AT1G33960.1 63 85  
 AIG1

leaves\_1sup\_AG01\_SoIexa\_Mi\_Cell\_2008\_hit\_target\_site.txt

SRNA\_AG01\_SoIexa\_Mi2008\_1\_19645\_hit1

```
5' UACAUUUGCUUG-A-GCCCUCUUG
  ||| ||| ||| ||| ||| ||| ||| |||
  AUGUAAACGAACUUACGAGAGAAC 5'
AT1G34370.3    347    370
zinc finger protein, putative
```

SRNA\_AG01\_SoIexa\_Mi2008\_1\_19645\_hit1

```
5' UACAUUUGCUUGA--GCCUCUUG
  ||| ||| ||| ||| ||| ||| ||| |||
  AUGUAAACGAACUUACGAGAGAAC 5'
AT1G34370.1    350    373
zinc finger protein, putative
```

SRNA\_AG01\_SoIexa\_Mi2008\_1\_19645\_hit1

```
5' UACAUUUGCUUG-A-GCCCUCUUG
  ||| ||| ||| ||| ||| ||| ||| |||
  AUGUAAACGAACUUACGAGAGAAC 5'
AT1G34370.2    360    383
zinc finger protein, putative
```

SRNA\_AG01\_SoIexa\_Mi2008\_1\_36323\_hit13

```
5' UGAGGAUGAUGAUGAU-GAUGA
  ||| ||| ||| ||| ||| ||| ||| |||
  ACUACUACUACUACUACU-CU 5'
AT1G34370.3    38    58
zinc finger protein, putative
```

SRNA\_AG01\_SoIexa\_Mi2008\_1\_3079\_hit472

```
5' AUGAUGAUGAUGAUGAU-GAUGA
  ||| ||| ||| ||| ||| ||| ||| |||
  GACUACUACUACUACUACU-CU 5'
AT1G34370.3    38    59
zinc finger protein, putative
```

SRNA\_AG01\_SoIexa\_Mi2008\_1\_45039\_hit3

```
5' UGUGAUGAUGAUGAUGAU-GAUGA
  ||| ||| ||| ||| ||| ||| ||| |||
  ACACUACUACUACUACUACU-CU 5'
AT1G34370.3    38    60
zinc finger protein, putative
```

SRNA\_AG01\_SoIexa\_Mi2008\_1\_36323\_hit13

```
5' UGAG-GAUGAUGAUGAUGAU-GA
  | || ||| ||| ||| ||| ||| ||| |||
  AAUCACUACUACUACUACUACU 5'
AT1G34370.3    40    62
zinc finger protein, putative
```

SRNA\_AG01\_SoIexa\_Mi2008\_1\_56092\_hit3

```
5' UUUGUGAUGAUGAUGAUGAU-GA
  ||| ||| ||| ||| ||| ||| ||| |||
  AAACACUACUACUACUACUACU 5'
AT1G34370.3    40    62
zinc finger protein, putative
```

SRNA\_AG01\_SoIexa\_Mi2008\_1\_36323\_hit13

```
5' UGAGGAUGAUGAUGAU-GAUGA
  ||| ||| ||| ||| ||| ||| ||| |||
  ACUACUACUACUACUACU-CU 5'
AT1G34370.1    41    61
zinc finger protein, putative
```

leaves\_1sup\_AG01\_SoLexa\_Mi\_Cell\_2008\_hit\_target\_site.txt

SRNA\_AG01\_SoLexa\_Mi2008\_1\_3079\_hit472

```
5' AUGAUGAUGAUGAUGAU-GAUGA
   |||
   GACUACUACUACUACUAUCU-CU 5'
AT1G34370.1      41      62
zinc finger protein, putative
```

SRNA\_AG01\_SoLexa\_Mi2008\_1\_45039\_hit3

```
5' UGUGAUGAUGAUGAUGAU-GAUGA
   |||
   ACACUACUACUACUACUAUCU-CU 5'
AT1G34370.1      41      63
zinc finger protein, putative
```

SRNA\_AG01\_SoLexa\_Mi2008\_1\_2280\_hit1

```
5' AGUGGAUGAUGAUGAUGAUG
   ||| |||
   UCAC-UACUACUACUACUAU 5'
AT1G34370.3      42      60
zinc finger protein, putative
```

SRNA\_AG01\_SoLexa\_Mi2008\_1\_36323\_hit13

```
5' UGAG-GAUGAUGAUGAUGAU-GA
   | || |||
   AAUCACUACUACUACUACUAUCU 5'
AT1G34370.1      43      65
zinc finger protein, putative
```

SRNA\_AG01\_SoLexa\_Mi2008\_1\_56092\_hit3

```
5' UUUGUGAUGAUGAUGAUGAU-GA
   |||
   AAACACUACUACUACUACUAUCU 5'
AT1G34370.1      43      65
zinc finger protein, putative
```

SRNA\_AG01\_SoLexa\_Mi2008\_1\_2280\_hit1

```
5' AGUGGAUGAUGAUGAUGAUG
   ||| |||
   UCAC-UACUACUACUACUAU 5'
AT1G34370.1      45      63
zinc finger protein, putative
```

SRNA\_AG01\_SoLexa\_Mi2008\_1\_40229\_hit3

```
5' UGGAGACAAGUGAUGAUGAUGAU
   ||| |||
   UACUCU-UUCACUACUACUACUA 5'
AT1G34370.3      46      67
zinc finger protein, putative
```

SRNA\_AG01\_SoLexa\_Mi2008\_1\_36323\_hit13

```
5' UGAGGAUGAUGAUGAUGAU-GAUGA
   ||| |||
   ACUACUACUACUACUAUCU-CU 5'
AT1G34370.2      47      67
zinc finger protein, putative
```

SRNA\_AG01\_SoLexa\_Mi2008\_1\_3079\_hit472

```
5' AUGAUGAUGAUGAUGAU-GAUGA
   |||
   GACUACUACUACUACUAUCU-CU 5'
AT1G34370.2      47      68
zinc finger protein, putative
```

leaves\_1sup\_AG01\_SoLexa\_Mi\_Cell\_2008\_hit\_target\_site.txt

SRNA\_AG01\_SoLexa\_Mi2008\_1\_45039\_hit3  
5' UGUGAUGAUGAUGAUGAU-GAUGA  
|||||  
ACACUACUACUACUACUACU-CU 5'  
AT1G34370.2 47 69  
zinc finger protein, putative

SRNA\_AG01\_SoLexa\_Mi2008\_1\_40229\_hit3  
5' UGGAGACAAGUGAUGAUGAUGAU  
|||||  
UACUCU-UUCACUACUACUACUA 5'  
AT1G34370.1 49 70  
zinc finger protein, putative

SRNA\_AG01\_SoLexa\_Mi2008\_1\_36323\_hit13  
5' UGAG-GAUGAUGAUGAUGAU-GA  
| |||  
AAUCACUACUACUACUACUACU 5'  
AT1G34370.2 49 71  
zinc finger protein, putative

SRNA\_AG01\_SoLexa\_Mi2008\_1\_56092\_hit3  
5' UUUGAUGAUGAUGAUGAUGAU-GA  
|||||  
AAACACUACUACUACUACUACU 5'  
AT1G34370.2 49 71  
zinc finger protein, putative

SRNA\_AG01\_SoLexa\_Mi2008\_1\_2280\_hit1  
5' AGUGGAUGAUGAUGAUGAUGAUG  
|||||  
UCAC-UACUACUACUACUACU 5'  
AT1G34370.2 51 69  
zinc finger protein, putative

SRNA\_AG01\_SoLexa\_Mi2008\_1\_40229\_hit3  
5' UGGAGACAAGUGAUGAUGAUGAU  
|||||  
UACUCU-UUCACUACUACUACUA 5'  
AT1G34370.2 55 76  
zinc finger protein, putative

SRNA\_AG01\_SoLexa\_Mi2008\_2\_378\_hit1  
5' AAAGAGAAGGGAU-AUUUUU  
|||  
UUU-UCUCCCUAUUAAAAC 5'  
AT1G34750.1 276 294  
protein phosphatase type 2C, putative

SRNA\_AG01\_SoLexa\_Mi2008\_1\_28030\_hit4  
5' UCAGAAGAAGCCAC-GUCAGAUGA  
|||||  
AGUCUUCUUCU-UGGCAGUCUACU 5'  
AT1G35210.1 259 281  
unknown protein

SRNA\_AG01\_SoLexa\_Mi2008\_1\_919\_hit1  
5' AAGGCUAAUGUUGAUCUUC  
|||||  
GUCCG-U-ACAACACUAGAAG 5'  
AT1G35310.1 137 155  
unknown protein

leaves\_1sup\_AG01\_SoLexa\_Mi\_Cell\_2008\_hit\_target\_site.txt

SRNA\_AG01\_SoLexa\_Mi2008\_1\_14083\_hit2

5' GAGGCCAAUGUUGUGAUCUA  
 ||||| | |||||  
 CUCCG-U-ACAACACUAGAA 5'  
 AT1G35310.1 138 155  
 unknown protein

SRNA\_AG01\_SoLexa\_Mi2008\_2\_9476\_hit2

5' CUA AAAA AUGGUGUAAUUU-GA  
 ||||| |||||  
 AAUUUUU-CCACAUUAAAGCU 5'  
 AT1G35580.1 1994 2013  
 invertase, putative

SRNA\_AG01\_SoLexa\_Mi2008\_2\_9476\_hit2

5' CUA AAAA AUGGUGUAAUUU-GA  
 ||||| |||||  
 AAUUUUU-CCACAUUAAAGCU 5'  
 AT1G35580.2 2006 2025  
 invertase, putative

SRNA\_AG01\_SoLexa\_Mi2008\_1\_26497\_hit1

5' UAUUUGUGA-GAGUUCGUGAAA  
 | ||| ||| |||||  
 AGAAA-ACUACUCAAGCACUUU 5'  
 AT1G35710.1 129 149  
 protein kinase, putative

SRNA\_AG01\_SoLexa\_Mi2008\_1\_19304\_hit2

5' UACACGUUCAUCGGAAAUGCU  
 |||||  
 AUGUGCAAGUAGCCUUUACGA 5'  
 AT1G35710.1 3219 3239  
 protein kinase, putative

SRNA\_AG01\_SoLexa\_Mi2008\_2\_5215\_hit1

5' CAAUUAG-UGGAGAAGUUCA  
 |||| | |||||  
 AUUAA-CUACCUCUUCAAGU 5'  
 AT1G35710.1 3368 3386  
 protein kinase, putative

SRNA\_AG01\_SoLexa\_Mi2008\_10\_17146\_hit1

5' UAACAACAACAAC-AAAGGUGAA  
 ||||| |||||  
 AUUGUUGUUGUUGUUUCGACUU 5'  
 AT1G35710.1 3487 3509  
 protein kinase, putative

SRNA\_AG01\_SoLexa\_Mi2008\_1\_18621\_hit1

5' UAAUACUAAACAUUUUCAUGG  
 ||||| |||||  
 AUUAUGAUUGGUUAUAAGUAAA 5'  
 AT1G36060.1 1809 1829  
 putative AP2 domain containing protein RAP2.4 gi|2281633

SRNA\_AG01\_SoLexa\_Mi2008\_1\_6293\_hit1

5' CAGCCAG-CGUGGAAGCACU  
 ||| || |||||  
 AUCG-UCUGCACCUUCGUGA 5'  
 AT1G36060.1 736 754  
 putative AP2 domain containing protein RAP2.4 gi|2281633

leaves\_1sup\_AG01\_SoLexa\_Mi\_Cell\_2008\_hit\_target\_site.txt

SRNA\_AG01\_SoLexa\_Mi2008\_3\_31107\_hit1

5' UCGAGUUUUCGGGUU-UUGAA  
:|:||||||||||||| |||||  
GGUUCAAAAGCCCAACAACUU 5'

AT1G36060.1 929 949

putative AP2 domain containing protein RAP2.4 gi|2281633

SRNA\_AG01\_SoLexa\_Mi2008\_1\_28845\_hit2

5' UCAUCACUAGGAAGCGUUGGA  
|||| |:|||||||||||||  
AGUAAUGGUCCUUCGCAACCU 5'

AT1G37130.1 1592 1612

nitrate reductase (At1g37130)

SRNA\_AG01\_SoLexa\_Mi2008\_12\_19915\_hit2

5' UACCGUCCUAGUCUCAACCAUA  
||| ||||||||||||||| |||  
AUG-CAGGAUCAGAGUUCGUAA 5'

AT1G42990.1 537 557

bZip transcription factor AtbZip60

SRNA\_AG01\_SoLexa\_Mi2008\_1\_43567\_hit2

5' UGGUGGUGGAGCGGUUGA-GAA  
||||||||||||| ||||| |||  
ACCACCACCUUG-CAACUCCUU 5'

AT1G43700.1 305 325

Vire2-interacting protein VIP1 / bZip factor AtbZip51

SRNA\_AG01\_SoLexa\_Mi2008\_2\_35306\_hit1

5' UGACAUCGAUGA-UUGGUUUCG  
|||||| || || |||||||||||  
ACUGUAUCU-CUUAACCAAAGC 5'

AT1G44750.2 336 356

Unknown protein (At1g44750)

SRNA\_AG01\_SoLexa\_Mi2008\_2\_35306\_hit1

5' UGACAUCGAUGA-UUGGUUUCG  
|||||| || || |||||||||||  
ACUGUAUCU-CUUAACCAAAGC 5'

AT1G44750.3 88 108

Unknown protein (At1g44750)

SRNA\_AG01\_SoLexa\_Mi2008\_2\_44202\_hit1

5' UGUAGGACGAAUGCUUUGGUA  
|||||||||||||||||||||  
ACAUCCUGCUUACGAAACCAU 5'

AT1G48410.1 1250 1270

Argonaute protein (AGO1)

SRNA\_AG01\_SoLexa\_Mi2008\_2\_44202\_hit1

5' UGUAGGACGAAUGCUUUGGUA  
|||||||||||||||||||||  
ACAUCCUGCUUACGAAACCAU 5'

AT1G48410.2 1256 1276

Argonaute protein (AGO1)

SRNA\_AG01\_SoLexa\_Mi2008\_13\_6596\_hit1

5' CAGGUAACCUUCAGCAAAGCA  
|||||||||||||||||||||  
GUCCAUUGGAAGUCGUUUCGU 5'

AT1G48410.1 1711 1731

Argonaute protein (AGO1)

leaves\_1sup\_AG01\_SoLexa\_Mi\_Cell\_2008\_hit\_target\_site.txt

SRNA\_AG01\_SoLexa\_Mi2008\_13\_6596\_hit1  
5' CAGGUAACCUUCAGCAAAGCA  
|||||  
GUCCAUUGGAAGUCGUUUCGU 5'  
AT1G48410.2 1717 1737  
Argonaute protein (AGO1)

SRNA\_AG01\_SoLexa\_Mi2008\_16\_26870\_hit1  
5' UCAACAGAAGCCAGAGAAGUA  
|||||  
AGUUGUCUUCGGUCUCUUCAU 5'  
AT1G48410.1 1831 1851  
Argonaute protein (AGO1)

SRNA\_AG01\_SoLexa\_Mi2008\_16\_26870\_hit1  
5' UCAACAGAAGCCAGAGAAGUA  
|||||  
AGUUGUCUUCGGUCUCUUCAU 5'  
AT1G48410.2 1837 1857  
Argonaute protein (AGO1)

SRNA\_AG01\_SoLexa\_Mi2008\_3\_40523\_hit1  
5' UGGAGGAGGCAGUAUACGAGC  
|||||  
ACCUCCUCCGUCAUAUGCUCG 5'  
AT1G48410.1 1853 1873  
Argonaute protein (AGO1)

SRNA\_AG01\_SoLexa\_Mi2008\_3\_40523\_hit1  
5' UGGAGGAGGCAGUAUACGAGC  
|||||  
ACCUCCUCCGUCAUAUGCUCG 5'  
AT1G48410.2 1859 1879  
Argonaute protein (AGO1)

SRNA\_AG01\_SoLexa\_Mi2008\_2\_28543\_hit1  
5' UCAGGGCGAGCACUGACUGGU  
|||||  
AGUCCCGCUCGUGACUGACCA 5'  
AT1G48410.1 2098 2118  
Argonaute protein (AGO1)

SRNA\_AG01\_SoLexa\_Mi2008\_2\_28543\_hit1  
5' UCAGGGCGAGCACUGACUGGU  
|||||  
AGUCCCGCUCGUGACUGACCA 5'  
AT1G48410.2 2104 2124  
Argonaute protein (AGO1)

SRNA\_AG01\_SoLexa\_Mi2008\_2\_36850\_hit22  
5' UGAGUGUGGUCCUCCUCUCC  
||| | |||||  
ACUC-CUCCAGGAGGAGAAGG 5'  
AT1G48410.2 417 436  
Argonaute protein (AGO1)

SRNA\_AG01\_SoLexa\_Mi2008\_1\_55475\_hit2  
5' UUUG-CUC-GCGGUGGUCCAGAC  
||| | |||||  
AAACAGAGACGCCACCAGGUCU 5'  
AT1G48410.2 485 507  
Argonaute protein (AGO1)

leaves\_1sup\_AG01\_SoLexa\_Mi\_Cell\_2008\_hit\_target\_site.txt

SRNA\_AG01\_SoLexa\_Mi2008\_1\_39168\_hit1

5' UGCUAGAAGAAGGUUAGGCU  
|||||  
ACGAUCUUCUCCAUAUCCGA 5'  
AT1G48410.2 669 689  
Argonaute protein (AG01)

SRNA\_AG01\_SoLexa\_Mi2008\_5\_6229\_hit1

5' CAGCAAAGAAAUGGUUAGCC  
|||||  
GUCGUUUCUUUACCAAUCGG 5'  
AT1G48410.2 751 770  
Argonaute protein (AG01)

SRNA\_AG01\_SoLexa\_Mi2008\_1\_28240\_hit1

5' UCAGCAAAGAAAUGGUUAGCC  
|||||  
AGUCGUUUCUUUACCAAUCGG 5'  
AT1G48410.2 751 771  
Argonaute protein (AG01)

SRNA\_AG01\_SoLexa\_Mi2008\_1\_28621\_hit15

5' UC-AGGUUGUCUGGUU-GAGUG  
|| |||||  
AGAUCCAACAGACCAAACUCUC 5'  
AT1G49470.1 293 314  
unknown protein

SRNA\_AG01\_SoLexa\_Mi2008\_1\_18744\_hit1

5' UAAUGAGGUGGAGGAACAUGGA  
|||||  
AUUACUCCACCUCCUUGUACCU 5'  
AT1G49470.1 321 342  
unknown protein

SRNA\_AG01\_SoLexa\_Mi2008\_2\_16084\_hit1

5' GUU-AGAGGAAGAGGUAAAA  
:|| |||||  
UAAGUCUCCUUCUCC-UUUU 5'  
AT1G50380.1 115 133  
oligopeptidase-like protein

SRNA\_AG01\_SoLexa\_Mi2008\_7\_42241\_hit1

5' UGGG-CUUCAUUUCUAUCAGUU  
||| |||||  
UCCCAGAAGUAAAGAGAGUCA 5'  
AT1G50380.1 2144 2165  
oligopeptidase-like protein

SRNA\_AG01\_SoLexa\_Mi2008\_1\_3\_hit25

5' AA-AAAAAA-AAAAAGAAAGA  
|| ||||| |||||:|  
UUGUUUUUUCUUUUUCUUUU 5'  
AT1G50380.1 2435 2455  
oligopeptidase-like protein

SRNA\_AG01\_SoLexa\_Mi2008\_1\_53557\_hit1

5' UUGUGAGUAAUA--GUGUAUGUGA  
||||| |||||  
AACACUCAUUUUCGCACACACA 5'  
AT1G50420.1 -1 22  
scarecrow 3 -like protein

leaves\_1sup\_AG01\_SoLexa\_Mi\_Cell\_2008\_hit\_target\_site.txt

SRNA\_AG01\_SoLexa\_Mi2008\_1\_12127\_hit1

```
5' CUGGUGGUUAUCUUGUGAGUA
  |||||
  GACCACCAAUAGAACACUCAU 5'
AT1G50420.1 13 33
scarecrow 3 -like protein
```

SRNA\_AG01\_SoLexa\_Mi2008\_1\_14022\_hit2

```
5' GAGCUCU-UUC-UUGAUUCUA
  | ||||| ||| |||||
  CCCGAGAGAAGGAACUAAGAU 5'
AT1G50420.1 1613 1633
scarecrow 3 -like protein
```

SRNA\_AG01\_SoLexa\_Mi2008\_4\_44854\_hit1

```
5' UGUCUCCAGGCAUUGAUGAU
  ||||| ||| |||||
  ACAGA-GGUACGUAACUACUC 5'
AT1G51380.1 942 961
putative RNA helicase
```

SRNA\_AG01\_SoLexa\_Mi2008\_10\_6379\_hit1

```
5' CAGCUUAGGACAAUUUGACU
  ||||| ||| |||||
  GUCGAAUCCUG-U-AACUGU 5'
AT1G51890.1 2013 2030
Putative protein kinase
```

SRNA\_AG01\_SoLexa\_Mi2008\_2\_9562\_hit1

```
5' CUAAC-AAACGCUACACCGUCGU
  ||||| ||| |||||:|||||
  GAUUGCUIUU-CGAUGUGGUAGCA 5'
AT1G52030.1 1749 1770
unknown protein
```

SRNA\_AG01\_SoLexa\_Mi2008\_2\_9562\_hit1

```
5' CUAAC-AAACGCUACACCGUCGU
  ||||| ||| |||||:|||||
  GAUUGCUIUU-CGAUGUGGUAGCA 5'
AT1G52030.2 1948 1969
unknown protein
```

SRNA\_AG01\_SoLexa\_Mi2008\_5\_14577\_hit1

```
5' GCC-GAGAGAUUGAAACGUU
  || ||:|||||
  AGGACUUCUACCUUUGCAA 5'
AT1G52030.2 340 359
unknown protein
```

SRNA\_AG01\_SoLexa\_Mi2008\_1\_1209\_hit1

```
5' AAUUGGUGCUGACCACUCGUC
  |||||
  UUAACCACGACUGGUGAGCAG 5'
AT1G52150.3 1127 1147
unknown protein
```

SRNA\_AG01\_SoLexa\_Mi2008\_8\_8960\_hit4

```
5' CGGACCAGGCUUCAUUCUUUU
  |||||
  GCCUGGUCCGAAGUAAGGUCC 5'
AT1G52150.3 1266 1286
unknown protein
```

leaves\_1sup\_AG01\_SoLexa\_Mi\_Cell\_2008\_hit\_target\_site.txt

SRNA\_AG01\_SoLexa\_Mi2008\_310\_14823\_hit7

```
5' GGACCAGGCUUCAUUCCCCC
   |||
   CCUGGUCCGAAGUAAGGUC 5'
AT1G52150.3 1267 1285
unknown protein
```

SRNA\_AG01\_SoLexa\_Mi2008\_641\_8959\_hit7

```
5' CGGACCAGGCUUCAUUCCCCC
   |||
   GCCUGGUCCGAAGUAAGGUC 5'
AT1G52150.3 1267 1286
unknown protein
```

SRNA\_AG01\_SoLexa\_Mi2008\_4138\_31731\_hit7

```
5' UCGGACCAGGCUUCAUUCCCCC
   :|||
   GGCCUGGUCCGAAGUAAGGUC 5'
AT1G52150.3 1267 1287
unknown protein
```

SRNA\_AG01\_SoLexa\_Mi2008\_1\_8958\_hit7

```
5' CGGACCAGGCUUCAUUCCCC
   |||
   GCCUGGUCCGAAGUAAGGU 5'
AT1G52150.3 1268 1286
unknown protein
```

SRNA\_AG01\_SoLexa\_Mi2008\_4\_8955\_hit2

```
5' CGGACCAGGCUUCAU-CCCC
   |||
   GCCUGGUCCGAAGUAAGGUC 5'
AT1G52150.3 1268 1287
unknown protein
```

SRNA\_AG01\_SoLexa\_Mi2008\_98\_31730\_hit7

```
5' UCGGACCAGGCUUCAUUCCCC
   :|||
   GGCCUGGUCCGAAGUAAGGU 5'
AT1G52150.3 1268 1287
unknown protein
```

SRNA\_AG01\_SoLexa\_Mi2008\_1\_11087\_hit3

```
5' CUCGGACCAGGCUUCAUUCCCC
   :|||
   AGGCCUGGUCCGAAGUAAGGU 5'
AT1G52150.3 1268 1288
unknown protein
```

SRNA\_AG01\_SoLexa\_Mi2008\_33\_15725\_hit3

```
5' GUCGGACCAGGCUUCAUUCCCC
   :|||
   AGGCCUGGUCCGAAGUAAGGU 5'
AT1G52150.3 1268 1288
unknown protein
```

SRNA\_AG01\_SoLexa\_Mi2008\_68\_49390\_hit1

```
5' UUCGGACCAGGCUUCAUUCCCC
   |:|||
   AGGCCUGGUCCGAAGUAAGGU 5'
AT1G52150.3 1268 1288
unknown protein
```

leaves\_1sup\_AG01\_SoLexa\_Mi\_Cell\_2008\_hit\_target\_site.txt

SRNA\_AG01\_SoLexa\_Mi2008\_6\_31729\_hit7

5' UCGGACCAGGCUUCAUCC  
:|||||  
GGCCUGGUCCGAAGUAAGG 5'  
AT1G52150.3 1269 1287  
unknown protein

SRNA\_AG01\_SoLexa\_Mi2008\_2\_31725\_hit2

5' UCGGACCAGGCUUCAU-CCC  
|||||  
CGCCUGGUCCGAAGUAAGGU 5'  
AT1G52150.3 1269 1288  
unknown protein

SRNA\_AG01\_SoLexa\_Mi2008\_1\_49389\_hit1

5' UUCGGACCAGGCUUCAUCC  
|:|||||  
AGGCCUGGUCCGAAGUAAGG 5'  
AT1G52150.3 1269 1288  
unknown protein

SRNA\_AG01\_SoLexa\_Mi2008\_15\_11085\_hit1

5' CUCGGACCAGGCUUCAU-CC  
|||||  
UCGCCUGGUCCGAAGUAAGG 5'  
AT1G52150.3 1270 1289  
unknown protein

SRNA\_AG01\_SoLexa\_Mi2008\_1\_28246\_hit1

5' UCAGCAACAUCAACAACAACU  
|||||  
UGUCGUUGUAGUUCUUGUUGU 5'  
AT1G52150.1 3310 3330  
unknown protein

SRNA\_AG01\_SoLexa\_Mi2008\_1\_28246\_hit1

5' UCAGCAACAUCAACAACAACU  
|||||  
UGUCGUUGUAGUUCUUGUUGU 5'  
AT1G52150.2 3313 3333  
unknown protein

SRNA\_AG01\_SoLexa\_Mi2008\_1\_351\_hit2

5' AAAGAA-GAAAAACAGAUCU  
|||||  
CUUCUUUCUUUUUGUCU-GA 5'  
AT1G52150.3 332 350  
unknown protein

SRNA\_AG01\_SoLexa\_Mi2008\_1\_28246\_hit1

5' UCAGCAACAUCAACAACAACU  
|||||  
UGUCGUUGUAGUUCUUGUUGU 5'  
AT1G52150.3 3389 3409  
unknown protein

SRNA\_AG01\_SoLexa\_Mi2008\_1\_34620\_hit1

5' UGAAGAUGAUGAUGAAGUU  
|||||:|||||  
ACUUCUGCUACUACUUCUU 5'  
AT1G52160.1 154 172  
unknown protein

leaves\_1sup\_AG01\_SoLexa\_Mi\_Cell\_2008\_hit\_target\_site.txt

SRNA\_AG01\_SoLexa\_Mi2008\_2\_50720\_hit1  
 5' UUGAGGGAGACAGAGAUAG  
 |||||  
 UACUCCUCUGUCUCU-UUC 5'  
 AT1G52190.1 87 105  
 peptide transporter like protein

SRNA\_AG01\_SoLexa\_Mi2008\_1\_29992\_hit1  
 5' UCCGGCUCCGGUGGAAGAUUGA  
 ||||| ||||| ||| ||  
 AGGCCGCGCCACCU-CUA-CU 5'  
 AT1G52290.1 115 134  
 protein kinase, putative

SRNA\_AG01\_SoLexa\_Mi2008\_1\_21321\_hit1  
 5' UAGAGCGUCGCCGUGUCUG-UG  
 :||| ||||| ||||| ||  
 GUCU-GCAGCGGCACAGACCAC 5'  
 AT1G52290.1 149 169  
 protein kinase, putative

SRNA\_AG01\_SoLexa\_Mi2008\_1\_1813\_hit1  
 5' AGAAGGUCCGUUGAUGGAUGA  
 ||||| |||||  
 UCUUCCAGGCUACUACCUACC 5'  
 AT1G52290.1 183 203  
 protein kinase, putative

SRNA\_AG01\_SoLexa\_Mi2008\_1\_27045\_hit1  
 5' UCAAGAAGGUCCGUUGAUGGAU  
 : ||||| |||||  
 GCUUCUCCAGGCUACUACCUA 5'  
 AT1G52290.1 185 206  
 protein kinase, putative

SRNA\_AG01\_SoLexa\_Mi2008\_2\_27044\_hit1  
 5' UCAAGAAGGUCCGUUGAUGG  
 : ||||| |||||  
 GCUUCUCCAGGCUACUACCUA 5'  
 AT1G52290.1 187 206  
 protein kinase, putative

SRNA\_AG01\_SoLexa\_Mi2008\_1\_39699\_hit1  
 5' UGGAACUGA-UGAUGAUGAUGA  
 ||||| | |||||  
 ACCUUGA-UGACUACUACUACU 5'  
 AT1G52310.1 898 918  
 protein kinase, putative

SRNA\_AG01\_SoLexa\_Mi2008\_1\_34289\_hit2  
 5' UGAAAUCGAUGUUGU-AAGUCC  
 : ||||| || |||||  
 GCUUUAGCUACAUCUUCAGG 5'  
 AT1G52400.2 1567 1588  
 beta-glucosidase, putative

SRNA\_AG01\_SoLexa\_Mi2008\_3\_21212\_hit1  
 5' UAGAGAGAGAAAAAGAUG-GC  
 ||||| ||||| ||  
 AUCUCUCUCUUCUUCUACUCG 5'  
 AT1G52740.1 48 68  
 putative histone H2A

leaves\_1sup\_AG01\_SoLexa\_Mi\_Cell\_2008\_hit\_target\_site.txt

SRNA\_AG01\_SoLexa\_Mi2008\_1\_4317\_hit1

```
5' CAACAAACAGCAUU-ACAGCAAG
   ||||| || | |||||
   GUUGUUUGU-GUUACUGUCGUUC 5'
AT1G52780.1 3207 3228
unknown protein
```

SRNA\_AG01\_SoLexa\_Mi2008\_2\_19339\_hit1

```
5' UACAGAACGACAAGGGAGAG
   ||||| |||||:
   UUGUCUUGCUCUCCUCUU 5'
AT1G52780.1 3285 3304
unknown protein
```

SRNA\_AG01\_SoLexa\_Mi2008\_1\_34058\_hit3

```
5' UGAAAAACUCUCGCGGUUAAUU
   ||||| ||||
   ACUUUUUGAGAGCG--AAUAAC 5'
AT1G53200.1 2004 2023
hypothetical protein; similar to EST gb|AI997566.1
```

SRNA\_AG01\_SoLexa\_Mi2008\_1\_17452\_hit1

```
5' UAACGCCGCAAUGA-GAAGACG
   ||||| || |||
   AUUGC GCGGUACUGCUACUGG 5'
AT1G53710.1 1637 1658
cell division control protein like protein
```

SRNA\_AG01\_SoLexa\_Mi2008\_1\_17452\_hit1

```
5' UAACGCCGCAAUGA-GAAGACG
   ||||| || |||
   AUUGC GCGGUACUGCUACUGG 5'
AT1G53710.2 1642 1663
cell division control protein like protein
```

SRNA\_AG01\_SoLexa\_Mi2008\_20\_3894\_hit2

```
5' CAAAACCCGUUGAUC AAUGAA
   ||||| |:|||||
   GUUUUGG-CGACUAGUUACUG 5'
AT1G53710.2 795 814
cell division control protein like protein
```

SRNA\_AG01\_SoLexa\_Mi2008\_20\_3894\_hit2

```
5' CAAAACCCGUUGAUC AAUGAA
   ||||| |:|||||
   GUUUUGG-CGACUAGUUACUG 5'
AT1G53710.1 870 889
cell division control protein like protein
```

SRNA\_AG01\_SoLexa\_Mi2008\_1\_5984\_hit23

```
5' CAGACAGAAAAUAAAAC-AC
   ||| | ||||| ||
   GUCU-UCUUUUUUUUUGCUG 5'
AT1G53780.1 1410 1428
hypothetical protein
```

SRNA\_AG01\_SoLexa\_Mi2008\_1\_2\_hit38

```
5' AAAAA-AAAAAAAAAACCAU
   ||| | ||||| ||
   UUUUUUUUUUUUUUGAUA 5'
AT1G53780.1 1505 1524
hypothetical protein
```

leaves\_1sup\_AG01\_Solexa\_Mi\_Cell\_2008\_hit\_target\_site.txt

SRNA\_AG01\_Solexa\_Mi2008\_1\_19021\_hit2

5' UACAAAAUACAAAU-UAUGCAUA  
|||  
AUGUUUUUUG-GUAGAUACGUAU 5'  
AT1G53790.2 900 921  
null

SRNA\_AG01\_Solexa\_Mi2008\_3\_39478\_hit1

5' UGCUUC-UCAGAUGUCUUGAA  
|||  
ACGAAGGAGUCGACAGAACUU 5'  
AT1G53910.3 584 604  
unknown protein

SRNA\_AG01\_Solexa\_Mi2008\_3\_39478\_hit1

5' UGCUUC-UCAGAUGUCUUGAA  
|||  
ACGAAGGAGUCGACAGAACUU 5'  
AT1G53910.2 590 610  
unknown protein

SRNA\_AG01\_Solexa\_Mi2008\_10\_12779\_hit2

5' CUUGAGGGUGUAAAUGUUCGA  
|||  
GAACUCCCACAUUUACAAGCU 5'  
AT1G53910.3 99 119  
unknown protein

SRNA\_AG01\_Solexa\_Mi2008\_1\_19666\_hit1

5' UACCAACAGCAGAAUC-CACCAU  
|||:|  
AUGGUUGUCGUUUUAGUGU-GUA 5'  
AT1G54100.2 487 508  
unknown protein

SRNA\_AG01\_Solexa\_Mi2008\_1\_19666\_hit1

5' UACCAACAGCAGAAUC-CACCAU  
|||:|  
AUGGUUGUCGUUUUAGUGU-GUA 5'  
AT1G54100.1 538 559  
unknown protein

SRNA\_AG01\_Solexa\_Mi2008\_7\_353\_hit2

5' AAAGAAGAAGAU-AA-AGCAU  
|||  
UUUCUUCUUCUACUUAUCCUA 5'  
AT1G54115.1 76 96

SRNA\_AG01\_Solexa\_Mi2008\_1\_352\_hit1

5' AAAGAAGAAGAU-AAAAGGA  
|||  
UUUCUUCUUCUACUUAUCCU 5'  
AT1G54115.1 77 96

SRNA\_AG01\_Solexa\_Mi2008\_6\_13422\_hit1

5' GAAGAAGAAGAUGAUUAAGGA  
|||  
AUUCUUCUUCUACUUA-UCCU 5'  
AT1G54115.1 77 96

SRNA\_AG01\_Solexa\_Mi2008\_1\_12560\_hit1

5' CUUCACAAGGUAC-UGAUGGA

leaves\_1sup\_AG01\_SoLexa\_Mi\_Cell\_2008\_hit\_target\_site.txt

```

|||||
UAAGUGUCCAUGUACUACCA 5'
AT1G54320.1      1134      1154
unknown protein

```

```

SRNA_AG01_SoLexa_Mi2008_12_46414_hit1
5' UUAACGCCGUGAUUGUU-UGGU
   ||||| ||||| ||||| ||:|
   AAUUGCUGCACUAACAACACUA 5'
AT1G55020.1      340      361
unknown protein

```

```

SRNA_AG01_SoLexa_Mi2008_1_28726_hit1
5' UCAGUGUGGAAGCUAAGUCUC
   ||| ||||| ||||| |||||
   AGU-ACACCUUCUAUUCAGAA 5'
AT1G55020.1      577      596
unknown protein

```

```

SRNA_AG01_SoLexa_Mi2008_1_46444_hit1
5' UUAACUCUGUGAUUGUUU-GGU
   ||||| ||||| ||| ||:
   AAUUGAGACACUAAGAAAUCCG 5'
AT1G56010.1      1000     1021
NAC1

```

```

SRNA_AG01_SoLexa_Mi2008_1_46444_hit1
5' UUAACUCUGUGAUUGUUU-GGU
   ||||| ||||| ||| ||:
   AAUUGAGACACUAAGAAAUCCG 5'
AT1G56010.2      1025     1046
NAC1

```

```

SRNA_AG01_SoLexa_Mi2008_1_13477_hit1
5' GAAGCAGGGCACGUG--CAUU
   ||||| ||||| ||||
   CUUCGUCCCAUGCACGAGUAA 5'
AT1G56010.1      773      793
NAC1

```

```

SRNA_AG01_SoLexa_Mi2008_2_14844_hit1
5' GGAGAAGCAGGGCACGUG--CAUU
   ||||| ||||| ||||| ||||
   CCUCUUCGUCCCAUGCACGAGUAA 5'
AT1G56010.1      773      796
NAC1

```

```

SRNA_AG01_SoLexa_Mi2008_91_40198_hit1
5' UGGAGAAGCAGGGCACGUG--CAUU
   ||||| ||||| ||||| ||||
   ACCUCUUCGUCCCAUGCACGAGUAA 5'
AT1G56010.1      773      797
NAC1

```

```

SRNA_AG01_SoLexa_Mi2008_2_13910_hit1
5' GAGAAGCAGGGCACGUGCAU
   ||||| ||||| :
   CUCUUCGUCCCAUGCACGAG 5'
AT1G56010.1      775      794
NAC1

```

```

SRNA_AG01_SoLexa_Mi2008_1_14842_hit1
5' GGAGAAGCAGGGCACGUGCAA

```

leaves\_1sup\_AG01\_Solexa\_Mi\_Cell\_2008\_hit\_target\_site.txt

```
|||||  
CCUCUUCGUCCCAUGCACGAG 5'  
AT1G56010.1 775 795  
NAC1
```

```
SRNA_AG01_Solexa_Mi2008_4_14843_hit1  
5' GGAGAAGCAGGGCACGUGCAU  
||||| :  
CCUCUUCGUCCCAUGCACGAG 5'  
AT1G56010.1 775 795  
NAC1
```

```
SRNA_AG01_Solexa_Mi2008_1_14846_hit1  
5' GGAGAAGCAGGGCACGUGCGA  
||||| :  
CCUCUUCGUCCCAUGCACGAG 5'  
AT1G56010.1 775 795  
NAC1
```

```
SRNA_AG01_Solexa_Mi2008_3_40196_hit1  
5' UGGAGAAGCAGGGCACGUGCAA  
||||| :  
ACCUCUUCGUCCCAUGCACGAG 5'  
AT1G56010.1 775 796  
NAC1
```

```
SRNA_AG01_Solexa_Mi2008_284_40197_hit1  
5' UGGAGAAGCAGGGCACGUGCAU  
||||| :  
ACCUCUUCGUCCCAUGCACGAG 5'  
AT1G56010.1 775 796  
NAC1
```

```
SRNA_AG01_Solexa_Mi2008_10440_13909_hit2  
5' GAGAAGCAGGGCACGUGCA  
||||| :  
CUCUUCGUCCCAUGCACGA 5'  
AT1G56010.1 776 794  
NAC1
```

```
SRNA_AG01_Solexa_Mi2008_110_13911_hit1  
5' GAGAAGCAGGGCACGUGCG  
||||| :  
CUCUUCGUCCCAUGCACGA 5'  
AT1G56010.1 776 794  
NAC1
```

```
SRNA_AG01_Solexa_Mi2008_41322_14841_hit2  
5' GGAGAAGCAGGGCACGUGCA  
||||| :  
CCUCUUCGUCCCAUGCACGA 5'  
AT1G56010.1 776 795  
NAC1
```

```
SRNA_AG01_Solexa_Mi2008_422_14845_hit1  
5' GGAGAAGCAGGGCACGUGCG  
||||| :  
CCUCUUCGUCCCAUGCACGA 5'  
AT1G56010.1 776 795  
NAC1
```

```
SRNA_AG01_Solexa_Mi2008_370931_40195_hit2  
5' UGGAGAAGCAGGGCACGUGCA
```

leaves\_1sup\_AG01\_SoLexa\_Mi\_Cell\_2008\_hit\_target\_site.txt

|||||  
ACCUCUUCGUCCCAUGCACGA 5'  
AT1G56010.1 776 796  
NAC1

SRNA\_AG01\_SoLexa\_Mi2008\_7589\_40199\_hit1  
5' UGGAGAAGCAGGGCACGUGCG  
|||||  
ACCUCUUCGUCCCAUGCACGA 5'  
AT1G56010.1 776 796  
NAC1

SRNA\_AG01\_SoLexa\_Mi2008\_2\_40202\_hit1  
5' UGGAGAAGCAGGGUACGUGCU  
|||||  
ACCUCUUCGUCCCAUGCACGA 5'  
AT1G56010.1 776 796  
NAC1

SRNA\_AG01\_SoLexa\_Mi2008\_1214\_3232\_hit1  
5' AUGGAGAAGCAGGGCACGUGCA  
|||||  
AACCUCUUCGUCCCAUGCACGA 5'  
AT1G56010.1 776 797  
NAC1

SRNA\_AG01\_SoLexa\_Mi2008\_24\_3233\_hit1  
5' AUGGAGAAGCAGGGCACGUGCG  
|||||  
AACCUCUUCGUCCCAUGCACGA 5'  
AT1G56010.1 776 797  
NAC1

SRNA\_AG01\_SoLexa\_Mi2008\_9\_52081\_hit1  
5' UUGGAGAAGCAGGGCACGUGCA  
|||||  
AACCUCUUCGUCCCAUGCACGA 5'  
AT1G56010.1 776 797  
NAC1

SRNA\_AG01\_SoLexa\_Mi2008\_23\_14840\_hit3  
5' GGAGAAGCAGGGCACGUGC  
|||||  
CCUCUUCGUCCCAUGCACG 5'  
AT1G56010.1 777 795  
NAC1

SRNA\_AG01\_SoLexa\_Mi2008\_1\_40190\_hit1  
5' UGGAGAAGCAGGGCACGUAA  
|||||  
ACCUCUUCGUCCCAUGCACG 5'  
AT1G56010.1 777 796  
NAC1

SRNA\_AG01\_SoLexa\_Mi2008\_404\_40194\_hit3  
5' UGGAGAAGCAGGGCACGUGC  
|||||  
ACCUCUUCGUCCCAUGCACG 5'  
AT1G56010.1 777 796  
NAC1

SRNA\_AG01\_SoLexa\_Mi2008\_2\_40201\_hit1  
5' UGGAGAAGCAGGGUACGUGC

leaves\_1sup\_AG01\_SoLexa\_Mi\_Cell\_2008\_hit\_target\_site.txt

|||||  
ACCUCUUCGUCCCAUGCACG 5'  
AT1G56010.1 777 796  
NAC1

SRNA\_AG01\_SoLexa\_Mi2008\_9\_40189\_hit2  
5' UGGAGAAGCAGGGCACGUA  
|||||  
ACCUCUUCGUCCCAUGCAC 5'  
AT1G56010.1 778 796  
NAC1

SRNA\_AG01\_SoLexa\_Mi2008\_366\_40193\_hit3  
5' UGGAGAAGCAGGGCACGUG  
|||||  
ACCUCUUCGUCCCAUGCAC 5'  
AT1G56010.1 778 796  
NAC1

SRNA\_AG01\_SoLexa\_Mi2008\_1\_40200\_hit1  
5' UGGAGAAGCAGGGUACGUG  
|||||  
ACCUCUUCGUCCCAUGCAC 5'  
AT1G56010.1 778 796  
NAC1

SRNA\_AG01\_SoLexa\_Mi2008\_2\_3231\_hit2  
5' AUGGAGAAGCAGGGCACGUG  
|||||  
AACCUCUUCGUCCCAUGCAC 5'  
AT1G56010.1 778 797  
NAC1

SRNA\_AG01\_SoLexa\_Mi2008\_1\_13477\_hit1  
5' GAAGCAGGGCACGUG--CAUU  
|||||  
CUUCGUCCCAUGCACGAGUAA 5'  
AT1G56010.2 798 818  
NAC1

SRNA\_AG01\_SoLexa\_Mi2008\_2\_14844\_hit1  
5' GGAGAAGCAGGGCACGUG--CAUU  
|||||  
CCUCUUCGUCCCAUGCACGAGUAA 5'  
AT1G56010.2 798 821  
NAC1

SRNA\_AG01\_SoLexa\_Mi2008\_91\_40198\_hit1  
5' UGGAGAAGCAGGGCACGUG--CAUU  
|||||  
ACCUCUUCGUCCCAUGCACGAGUAA 5'  
AT1G56010.2 798 822  
NAC1

SRNA\_AG01\_SoLexa\_Mi2008\_2\_13910\_hit1  
5' GAGAAGCAGGGCACGUGCAU  
||||| :  
CUCUUCGUCCCAUGCACGAG 5'  
AT1G56010.2 800 819  
NAC1

SRNA\_AG01\_SoLexa\_Mi2008\_1\_14842\_hit1  
5' GGAGAAGCAGGGCACGUGCAA

leaves\_1sup\_AG01\_SoLexa\_Mi\_Cell\_2008\_hit\_target\_site.txt

```
|||||
CCUCUUCGUCCCAUGCACGAG 5'
AT1G56010.2      800      820
NAC1
```

```
SRNA_AG01_SoLexa_Mi2008_4_14843_hit1
5' GGAGAAGCAGGGCACGUGCAU
   |||||
   CCUCUUCGUCCCAUGCACGAG 5'
AT1G56010.2      800      820
NAC1
```

```
SRNA_AG01_SoLexa_Mi2008_1_14846_hit1
5' GGAGAAGCAGGGCACGUGCGA
   |||||
   CCUCUUCGUCCCAUGCACGAG 5'
AT1G56010.2      800      820
NAC1
```

```
SRNA_AG01_SoLexa_Mi2008_3_40196_hit1
5' UGGAGAAGCAGGGCACGUGCAA
   |||||
   ACCUCUUCGUCCCAUGCACGAG 5'
AT1G56010.2      800      821
NAC1
```

```
SRNA_AG01_SoLexa_Mi2008_284_40197_hit1
5' UGGAGAAGCAGGGCACGUGCAU
   |||||
   ACCUCUUCGUCCCAUGCACGAG 5'
AT1G56010.2      800      821
NAC1
```

```
SRNA_AG01_SoLexa_Mi2008_10440_13909_hit2
5' GAGAAGCAGGGCACGUGCA
   |||||
   CUCUUCGUCCCAUGCACGA 5'
AT1G56010.2      801      819
NAC1
```

```
SRNA_AG01_SoLexa_Mi2008_110_13911_hit1
5' GAGAAGCAGGGCACGUGCG
   |||||
   CUCUUCGUCCCAUGCACGA 5'
AT1G56010.2      801      819
NAC1
```

```
SRNA_AG01_SoLexa_Mi2008_41322_14841_hit2
5' GGAGAAGCAGGGCACGUGCA
   |||||
   CCUCUUCGUCCCAUGCACGA 5'
AT1G56010.2      801      820
NAC1
```

```
SRNA_AG01_SoLexa_Mi2008_422_14845_hit1
5' GGAGAAGCAGGGCACGUGCG
   |||||
   CCUCUUCGUCCCAUGCACGA 5'
AT1G56010.2      801      820
NAC1
```

```
SRNA_AG01_SoLexa_Mi2008_370931_40195_hit2
5' UGGAGAAGCAGGGCACGUGCA
```

leaves\_1sup\_AG01\_SoLexa\_Mi\_Cell\_2008\_hit\_target\_site.txt

```
|||||  
|||||  
ACCUCUUCGUCCCAUGCACGA 5'  
AT1G56010.2      801      821  
NAC1
```

```
SRNA_AG01_SoLexa_Mi2008_7589_40199_hit1  
5' UGGAGAAGCAGGGCACGUGCG  
|||||  
|||||  
ACCUCUUCGUCCCAUGCACGA 5'  
AT1G56010.2      801      821  
NAC1
```

```
SRNA_AG01_SoLexa_Mi2008_2_40202_hit1  
5' UGGAGAAGCAGGGUACGUGCU  
|||||  
|||||  
ACCUCUUCGUCCCAUGCACGA 5'  
AT1G56010.2      801      821  
NAC1
```

```
SRNA_AG01_SoLexa_Mi2008_1214_3232_hit1  
5' AUGGAGAAGCAGGGCACGUGCA  
|||||  
|||||  
AACCUCUUCGUCCCAUGCACGA 5'  
AT1G56010.2      801      822  
NAC1
```

```
SRNA_AG01_SoLexa_Mi2008_24_3233_hit1  
5' AUGGAGAAGCAGGGCACGUGCG  
|||||  
|||||  
AACCUCUUCGUCCCAUGCACGA 5'  
AT1G56010.2      801      822  
NAC1
```

```
SRNA_AG01_SoLexa_Mi2008_9_52081_hit1  
5' UUGGAGAAGCAGGGCACGUGCA  
|||||  
|||||  
AACCUCUUCGUCCCAUGCACGA 5'  
AT1G56010.2      801      822  
NAC1
```

```
SRNA_AG01_SoLexa_Mi2008_23_14840_hit3  
5' GGAGAAGCAGGGCACGUGC  
|||||  
|||||  
CCUCUUCGUCCCAUGCACG 5'  
AT1G56010.2      802      820  
NAC1
```

```
SRNA_AG01_SoLexa_Mi2008_1_40190_hit1  
5' UGGAGAAGCAGGGCACGUAA  
|||||  
|||||  
ACCUCUUCGUCCCAUGCACG 5'  
AT1G56010.2      802      821  
NAC1
```

```
SRNA_AG01_SoLexa_Mi2008_404_40194_hit3  
5' UGGAGAAGCAGGGCACGUGC  
|||||  
|||||  
ACCUCUUCGUCCCAUGCACG 5'  
AT1G56010.2      802      821  
NAC1
```

```
SRNA_AG01_SoLexa_Mi2008_2_40201_hit1  
5' UGGAGAAGCAGGGUACGUGC
```

leaves\_1sup\_AG01\_SoLexa\_Mi\_Cell\_2008\_hit\_target\_site.txt

|||||  
ACCUCUUCGUCCCAUGCACG 5'  
AT1G56010.2 802 821  
NAC1

SRNA\_AG01\_SoLexa\_Mi2008\_9\_40189\_hit2  
5' UGGAGAAGCAGGGCACGUA  
|||||  
ACCUCUUCGUCCCAUGCAC 5'  
AT1G56010.2 803 821  
NAC1

SRNA\_AG01\_SoLexa\_Mi2008\_366\_40193\_hit3  
5' UGGAGAAGCAGGGCACGUG  
|||||  
ACCUCUUCGUCCCAUGCAC 5'  
AT1G56010.2 803 821  
NAC1

SRNA\_AG01\_SoLexa\_Mi2008\_1\_40200\_hit1  
5' UGGAGAAGCAGGGUACGUG  
|||||  
ACCUCUUCGUCCCAUGCAC 5'  
AT1G56010.2 803 821  
NAC1

SRNA\_AG01\_SoLexa\_Mi2008\_2\_3231\_hit2  
5' AUGGAGAAGCAGGGCACGUG  
|||||  
AACCUCUUCGUCCCAUGCAC 5'  
AT1G56010.2 803 822  
NAC1

SRNA\_AG01\_SoLexa\_Mi2008\_1\_48023\_hit1  
5' UU-AG-UUCAAGUUGGGUAAA  
|| || |||||  
AACUCUAAGUUCAAACCAUUU 5'  
AT1G56140.1 1224 1244  
receptor-like protein kinase, putative

SRNA\_AG01\_SoLexa\_Mi2008\_1\_5211\_hit1  
5' CAA-UUAAGUUUGAAAUGACU  
||| |||||:|||  
GUUCAAUUCAAAACUUUUGCUGC 5'  
AT1G56140.1 863 884  
receptor-like protein kinase, putative

SRNA\_AG01\_SoLexa\_Mi2008\_1\_30079\_hit1  
5' UCCGUGCCGCAACAACGUUCG  
||||| || |||  
AGGCACGGCGUUGUGGC-AGC 5'  
AT1G56230.1 113 132  
hypothetical protein

SRNA\_AG01\_SoLexa\_Mi2008\_1\_3712\_hit1  
5' AUUGCUAUUUCAGUUGGAUCUU  
||||| |||||  
CAACGAAAAAGUCAACCUAGAA 5'  
AT1G56230.1 1950 1971  
hypothetical protein

SRNA\_AG01\_SoLexa\_Mi2008\_3\_6705\_hit1  
5' CAGUCUCAGGUGAAUCAG-AU

leaves\_1sup\_AG01\_SoLexa\_Mi\_Cell\_2008\_hit\_target\_site.txt

|||||||:||||||| ||  
 GUCAGAGUUCACUUAGUCCUA 5'  
 AT1G56230.1 544 564  
 hypothetical protein

SRNA\_AG01\_SoLexa\_Mi2008\_1\_1445\_hit1  
 5' ACAGUCUCAGGUGAAUCAG-AU  
 |||||:||||||| ||  
 UGUCAGAGUUCACUUAGUCCUA 5'  
 AT1G56230.1 544 565  
 hypothetical protein

SRNA\_AG01\_SoLexa\_Mi2008\_1\_4378\_hit1  
 5' CAACAGUCUCAGGUGAAUCAG  
 |||||:||||||| ||  
 UUUGUCAGAGUUCACUUAGUC 5'  
 AT1G56230.1 546 566  
 hypothetical protein

SRNA\_AG01\_SoLexa\_Mi2008\_1\_49627\_hit1  
 5' UUCGUUCGGAGCCGCACUUUA  
 ||| ||||| ||||| ||  
 AAG-AAGCCUCUGCGUGAAAC 5'  
 AT1G57620.1 246 265  
 unknown protein

SRNA\_AG01\_SoLexa\_Mi2008\_1\_31526\_hit1  
 5' UCGCGGACCACGGGACCAUUUU  
 ||||| ||||| ||||| ||  
 AGCGCCUGGUGCCCUGGUA 5'  
 AT1G57650.1 -3 18  
 null

SRNA\_AG01\_SoLexa\_Mi2008\_1\_40990\_hit1  
 5' UGGAUUAAAGAAGGUGUUGUU  
 ||||| ||||| ||||| ||  
 ACCUAAUUUCUCCACAACAA 5'  
 AT1G58030.1 37 57

SRNA\_AG01\_SoLexa\_Mi2008\_7\_14756\_hit2  
 5' GCUACCUU-AAGAGAGUCA-UAG  
 | ||||| ||||| ||||| ||  
 CCAUGGAAAUUCUCUCAGUUAUC 5'  
 AT1G58340.1 972 994  
 putative protein

SRNA\_AG01\_SoLexa\_Mi2008\_2\_31038\_hit1  
 5' UCGAGUGGUGAUCGUGUGGUUC  
 |||||:||||| ||||| ||  
 AGCUCACUACUAGAACACCAA 5'  
 AT1G59590.1 79 100  
 unknown protein

SRNA\_AG01\_SoLexa\_Mi2008\_4\_31037\_hit1  
 5' UCGAGUGGUGAUCGUGUGGUU  
 |||||:||||| ||||| ||  
 AGCUCACUACUAGAACACCAA 5'  
 AT1G59590.1 80 100  
 unknown protein

SRNA\_AG01\_SoLexa\_Mi2008\_3\_7132\_hit1  
 5' CAUGAGCAGCUUG-AU-AUGGU  
 ||||| || || |

leaves\_1sup\_AG01\_SoLexa\_Mi\_Cell\_2008\_hit\_target\_site.txt

GUACUCGUCGAACUUAGUACGA 5'  
AT1G59820.1 2822 2843  
hypothetical protein

SRNA\_AG01\_SoLexa\_Mi2008\_1\_1474\_hit1  
5' ACAUGAGCAGCUUG-AU-AUGGU  
|||||  
UGUACUCGUCGAACUUAGUACGA 5'  
AT1G59820.1 2822 2844  
hypothetical protein

SRNA\_AG01\_SoLexa\_Mi2008\_1\_35436\_hit1  
5' UGACCGUGGUACCUUAUGUG  
|||||  
ACUGGCACCAUGGACAUACAC 5'  
AT1G59900.1 924 944  
pyruvate dehydrogenase E1 alpha subunit, putative

SRNA\_AG01\_SoLexa\_Mi2008\_1\_3401\_hit1  
5' AUGGUGGUGUCUUCAGC-CUCUU  
|||||  
UACCACCACAG-AGUCGCAAGAA 5'  
AT1G60710.1 1128 1149  
unknown protein

SRNA\_AG01\_SoLexa\_Mi2008\_1\_13420\_hit2  
5' GAAGAAGAAGAAGACUCUU  
|||||  
CUUCUUCUGCUUCUGA-AA 5'  
AT1G61250.1 65 82  
unknown protein

SRNA\_AG01\_SoLexa\_Mi2008\_1\_55863\_hit1  
5' UUUGGGUGGCGAUUUUGUGGUGUA  
:|||  
GAACACACCCCUAAACACCACAU 5'  
AT1G61380.1 671 693  
S-like receptor protein kinase

SRNA\_AG01\_SoLexa\_Mi2008\_2\_40937\_hit1  
5' UG-GAUGGCGAUUUUGUGGUGUA  
|||  
ACAC-ACCCUAAACACCACAU 5'  
AT1G61380.1 672 692  
S-like receptor protein kinase

SRNA\_AG01\_SoLexa\_Mi2008\_1\_34051\_hit1  
5' UGA-AAAAAAAAGAGAGGGAC  
|||  
ACUGUUUUUUUCUCUCCAU 5'  
AT1G61730.1 1323 1343  
unknown protein

SRNA\_AG01\_SoLexa\_Mi2008\_1\_11311\_hit1  
5' CUGA-AAAAAAAAGAGAGGG  
|||  
AACUGUUUUUUUCUCUCCC 5'  
AT1G61730.1 1325 1344  
unknown protein

SRNA\_AG01\_SoLexa\_Mi2008\_1\_35311\_hit3  
5' UGAC-AUGAUGUUGAUGUGCAUA  
|||||

leaves\_1sup\_AG01\_SoLexa\_Mi\_Cell\_2008\_hit\_target\_site.txt

ACUGGUACUACAACUACAC-UAC 5'  
AT1G62360.1 104 125  
homeobox transcription factor shootmeristemless (stm)

SRNA\_AG01\_SoLexa\_Mi2008\_1\_35310\_hit3  
5' UGAC-AUGAUGUUGAUGUGCA  
||||| |||||||||  
ACUGGUACUACAACUACACUA 5'  
AT1G62360.1 105 125  
homeobox transcription factor shootmeristemless (stm)

SRNA\_AG01\_SoLexa\_Mi2008\_1\_2990\_hit3  
5' AUGAC-AUGAUGUUGAUGUGCAU  
||||| ||||||||| ||  
UACUGGUACUACAACUACAC-UA 5'  
AT1G62360.1 105 126  
homeobox transcription factor shootmeristemless (stm)

SRNA\_AG01\_SoLexa\_Mi2008\_2\_13419\_hit2  
5' GAAGAAGAAGAAG-ACACUU  
||||| ||||||||| | |||||  
CUUCUUCUUCUUCGU-UGAA 5'  
AT1G62360.1 239 257  
homeobox transcription factor shootmeristemless (stm)

SRNA\_AG01\_SoLexa\_Mi2008\_1\_3891\_hit1  
5' CAAAACCAGAAGGAUGAUAAA  
||||| ||||||||| |||  
GUUUUGCUCUCCUACU-UUU 5'  
AT1G62570.1 1421 1440  
similar to glutamate synthase

SRNA\_AG01\_SoLexa\_Mi2008\_30\_14853\_hit1  
5' GGAGAGAGCAAAGUUGAGA  
| ||||||||| |||  
CGUCUCUGUUUCAAUUCU 5'  
AT1G63010.1 190 208  
tetracycline resistance efflux protein like protein

SRNA\_AG01\_SoLexa\_Mi2008\_30\_14853\_hit1  
5' GGAGAGAGCAAAGUUGAGA  
| ||||||||| |||  
CGUCUCUGUUUCAAUUCU 5'  
AT1G63010.4 310 328  
tetracycline resistance efflux protein like protein

SRNA\_AG01\_SoLexa\_Mi2008\_30\_14853\_hit1  
5' GGAGAGAGCAAAGUUGAGA  
| ||||||||| |||  
CGUCUCUGUUUCAAUUCU 5'  
AT1G63010.2 409 427  
tetracycline resistance efflux protein like protein

SRNA\_AG01\_SoLexa\_Mi2008\_30\_14853\_hit1  
5' GGAGAGAGCAAAGUUGAGA  
| ||||||||| |||  
CGUCUCUGUUUCAAUUCU 5'  
AT1G63010.3 410 428  
tetracycline resistance efflux protein like protein

SRNA\_AG01\_SoLexa\_Mi2008\_1\_50002\_hit1  
5' UUGAACAUUGUGGUG-UGAGUG  
||||| ||||||||| | |||||

leaves\_1sup\_AG01\_SoLexa\_Mi\_Cell\_2008\_hit\_target\_site.txt

AACUUGUAACACCUCUACUCA 5'  
AT1G63840.1 399 420  
putative RING zinc finger protein

SRNA\_AG01\_SoLexa\_Mi2008\_1\_3384\_hit1  
5' AUGGUGAAGAUGUUUCUAGU  
| | | | | | | | | | | | | | | | | | | | | |  
CACCACUACUACAAAGAUCU 5'  
AT1G63840.1 73 92  
putative RING zinc finger protein

SRNA\_AG01\_SoLexa\_Mi2008\_10\_12740\_hit16  
5' CUUGACACGUGGCACGAUC  
| | | | | | | | | | | | | | | | | | | | | |  
CUCCUGUCACCGUGCUAG 5'  
AT1G64065.1 146 164

SRNA\_AG01\_SoLexa\_Mi2008\_2\_8245\_hit1  
5' CGAA-AAGAAGAAGAUGAUGAG  
| | | | | | | | | | | | | | | | | | | | | |  
GCUUCUUCUUCUUCUUCUACUC 5'  
AT1G64065.1 229 250

SRNA\_AG01\_SoLexa\_Mi2008\_1\_27754\_hit1  
5' UCACCUCAUGAUGAACUUGGA  
| | | | | | | | | | | | | | | | | | | | | |  
CGUGGUG-ACUACUUGAACCU 5'  
AT1G64660.1 798 817  
similar to O-succinylhomoserine sulfhydrylase

SRNA\_AG01\_SoLexa\_Mi2008\_1\_16704\_hit12  
5' UAAAGAGGGUGCUGCAA-AGUU  
| | | | | | | | | | | | | | | | | | | | | |  
AGUUCUCCACGACGAUCUCA 5'  
AT1G64970.1 125 146  
unknown protein

SRNA\_AG01\_SoLexa\_Mi2008\_1\_13420\_hit2  
5' GAAGAAGAAGAAGACUCUU  
| | | | | | | | | | | | | | | | | | | | | |  
CUUCUUCUUCUUC-GA-AA 5'  
AT1G65690.1 14 30  
unknown protein

SRNA\_AG01\_SoLexa\_Mi2008\_2\_13419\_hit2  
5' GAAGAAGAAGAAGACA-CUU  
| | | | | | | | | | | | | | | | | | | | | |  
CUUCUUCUUCUUCU-UCGAA 5'  
AT1G65690.1 15 33  
unknown protein

SRNA\_AG01\_SoLexa\_Mi2008\_3\_13421\_hit1  
5' GAAGAAGAAGAUGAUGUUGAU  
: | | | | | | | | | | | | | | | | | | | | | |  
UUUCUUCUUCUACUACUACUU 5'  
AT1G66090.1 101 121  
unknown protein

SRNA\_AG01\_SoLexa\_Mi2008\_6\_29484\_hit1  
5' UCCAGGACCAAACCACGUUGU  
| | | | | | | | | | | | | | | | | | | | | |  
AGGUCCUGGUAUGGUG-AACU 5'  
AT1G66090.1 1049 1068

leaves\_1sup\_AG01\_SoIexa\_Mi\_Cell\_2008\_hit\_target\_site.txt

unknown protein

SRNA\_AG01\_SoIexa\_Mi2008\_1\_48999\_hit1

5' UUCCAGGACCAAACCACGUUG  
| | | | | | | | | | | | | | | | | | |  
AAGGUCCUGGUAUGGUG-AAC 5'  
AT1G66090.1 1050 1069  
unknown protein

SRNA\_AG01\_SoIexa\_Mi2008\_1\_1763\_hit2

5' ACUUCAGGACCAAACCACGU  
| | | | | | | | | | | | | | | | | | |  
UGAAGGUCCUGGUAUGGUGAA 5'  
AT1G66090.1 1050 1070  
unknown protein

SRNA\_AG01\_SoIexa\_Mi2008\_26\_20692\_hit2

5' UACUUCAGGACCAAACCACGU  
| | | | | | | | | | | | | | | | | | |  
AUGAAGGUCCUGGUAUGGUGAA 5'  
AT1G66090.1 1050 1071  
unknown protein

SRNA\_AG01\_SoIexa\_Mi2008\_12\_20691\_hit2

5' UACUUCAGGACCAAACCACG  
| | | | | | | | | | | | | | | | | | |  
AUGAAGGUCCUGGUAUGGUGA 5'  
AT1G66090.1 1051 1071  
unknown protein

SRNA\_AG01\_SoIexa\_Mi2008\_2\_8245\_hit1

5' CGA-AAAGAAGAAGAUGAUGAG  
| | | | | | | | | | | | | | | | | | |  
ACUAAUUUCUUCUUCUACUACUA 5'  
AT1G66090.1 105 126  
unknown protein

SRNA\_AG01\_SoIexa\_Mi2008\_3\_27133\_hit1

5' UCAAG-CACCAGCUCGAAGAAG  
| | | | | | | | | | | | | | | | | | |  
AGUUCUGUGGUCGAGCUACUUCG 5'  
AT1G66090.1 346 368  
unknown protein

SRNA\_AG01\_SoIexa\_Mi2008\_1\_27132\_hit1

5' UCAAG-CACCAGCUCGAAGAAG  
| | | | | | | | | | | | | | | | | | |  
AGUUCUGUGGUCGAGCUACUUC 5'  
AT1G66090.1 347 368  
unknown protein

SRNA\_AG01\_SoIexa\_Mi2008\_3\_39171\_hit1

5' UGCUAGAGAGUAGGCUU-UGU  
| | | | | | | | | | | | | | | | | | |  
ACGAUCUCUCAUCC-AAUACA 5'  
AT1G66090.1 795 814  
unknown protein

SRNA\_AG01\_SoIexa\_Mi2008\_1\_34620\_hit1

5' UGAAGAUGAUGAUGAAGUU  
| | | | | | | | | | | | | | | | | | |  
UCUUCUACUACUACUUCUU 5'  
AT1G66090.1 98 116

leaves\_1sup\_AG01\_SoLexa\_Mi\_Cell\_2008\_hit\_target\_site.txt

unknown protein

SRNA\_AG01\_SoLexa\_Mi2008\_2\_11307\_hit2

5' CUCUUUGAACCAUUUGAU-CA  
|||  
AAGAAACUUGGUAUUU-UACGU 5'  
AT1G66860.1 618 637  
unknown protein

SRNA\_AG01\_SoLexa\_Mi2008\_1\_46069\_hit17

5' UGUUUUAAGUGUUUCAG--GUUUG  
|||  
ACAAAUUCACAAAUCUGCAAAC 5'  
AT1G66880.1 220 242  
wall-associated kinase like protein

SRNA\_AG01\_SoLexa\_Mi2008\_1\_45181\_hit3

5' UGUGCGGUUGAUUAU-UGUCGUU  
:|||  
GCACGCCAACUAUACACA-CAA 5'  
AT1G66880.1 3360 3380  
wall-associated kinase like protein

SRNA\_AG01\_SoLexa\_Mi2008\_1\_6424\_hit2

5' CAG-GAAGCUCUGGCAAU-GAU  
||| |||:|||  
GUCGCUUCGAGAUCGUUACCUA 5'  
AT1G66880.1 710 731  
wall-associated kinase like protein

SRNA\_AG01\_SoLexa\_Mi2008\_1\_45073\_hit1

5' UGUGAUUGGUGAAUGCAAGGG  
||| |||  
ACAC-AACCACUUACAUUCCC 5'  
AT1G66880.1 851 870  
wall-associated kinase like protein

SRNA\_AG01\_SoLexa\_Mi2008\_1\_2\_hit38

5' AAAAAAAAAA-AAAAACCAU  
||| ||| |  
UUUUUUUUUCUUUUUGUCA 5'  
AT1G66940.3 991 1010  
unknown protein

SRNA\_AG01\_SoLexa\_Mi2008\_1\_341\_hit1

5' AAAGAAACAGAGAGGAAGAU  
||| |||  
UUU-UUUGUCUCUC-UCUU 5'  
AT1G66970.1 2364 2381  
Glycerophosphodiesterase-like (GPD3)

SRNA\_AG01\_SoLexa\_Mi2008\_2\_13419\_hit2

5' GAAGAAGAAGAAGACACUU  
||| :  
CUUCUUCUUCUUCUGUUGC 5'  
AT1G67050.1 712 730  
unknown protein

SRNA\_AG01\_SoLexa\_Mi2008\_3\_330\_hit1

5' AAACUCAGAAGAACAUCU  
||| :  
UUUGAGUCUUCUUG-AACG 5'  
AT1G67310.1 646 663

leaves\_1sup\_AG01\_SoLexa\_Mi\_Cell\_2008\_hit\_target\_site.txt  
Calmodulin-binding transcription activator 4 (CAMTA4)

SRNA\_AG01\_SoLexa\_Mi2008\_1\_11311\_hit1  
5' CUGAA-AAAAAAGAGAGGG  
    |||||  
    UACUUCUUUUUUUCUCUCCA 5'  
AT1G67360.2    1026    1045  
unknown protein

SRNA\_AG01\_SoLexa\_Mi2008\_3\_492\_hit1  
5' AAAGGACCAGGACAGAAUCAA  
    |||||  
    UUUC-UGGUCCUCUCUAGUC 5'  
AT1G67360.1    332    351  
unknown protein

SRNA\_AG01\_SoLexa\_Mi2008\_3\_492\_hit1  
5' AAAGGACCAGGACAGAAUCAA  
    |||||  
    UUUC-UGGUCCUCUCUAGUC 5'  
AT1G67360.2    430    449  
unknown protein

SRNA\_AG01\_SoLexa\_Mi2008\_1\_11311\_hit1  
5' CUGAA-AAAAAAGAGAGGG  
    |||||  
    UACUUCUUUUUUUCUCUCCA 5'  
AT1G67360.1    928    947  
unknown protein

SRNA\_AG01\_SoLexa\_Mi2008\_1\_21468\_hit1  
5' UAGAGGUUAUCAUCGGAGAUGGUC  
    |||||  
    AUCUCGAUAUGUAACCUCUAACAG 5'  
AT1G67580.1    2956    2979  
putative protein kinase

SRNA\_AG01\_SoLexa\_Mi2008\_1\_1919\_hit6  
5' AGAGCUAUACAUUGGAGAUGGU  
    |||||  
    UCUCGAUAUGUAACCUCUAACA 5'  
AT1G67580.1    2957    2978  
putative protein kinase

SRNA\_AG01\_SoLexa\_Mi2008\_1\_21332\_hit1  
5' UAGAGCUAUACAUUGGAGA-UGAUC  
    |||||  
    AUCUCGAUAUGUAACCUCUAAC-AG 5'  
AT1G67580.1    2957    2980  
putative protein kinase

SRNA\_AG01\_SoLexa\_Mi2008\_1\_54254\_hit3  
5' UUUAGAGGUG-GAUUAGAGCUAUA  
    ||||| :  
    AAAUCUC-AUUCUAUAUCUCGAUUA 5'  
AT1G67580.1    2971    2994  
putative protein kinase

SRNA\_AG01\_SoLexa\_Mi2008\_1\_54253\_hit3  
5' UUUAGAGGUG-GAUUAGAGCUA  
    ||||| :  
    AAAUCUC-AUUCUAUAUCUCGAU 5'  
AT1G67580.1    2973    2994

putative protein kinase

SRNA\_AG01\_SoLexa\_Mi2008\_1\_820\_hit13

```
5' AAGAUAAAUAGAAAU-GAAU
   |:||||||||||||| ||||
   UAUUUAUUUAUCUUUAUCUUA 5'
AT1G67580.1 3061 3080
putative protein kinase
```

SRNA\_AG01\_SoLexa\_Mi2008\_8\_8512\_hit2

```
5' CGAGAGGAACCG-UUGAUUC
   ||||||||||| || ||||
   UCUCUCCUUGGCCAA-UAAG 5'
AT1G67800.4 1510 1528
unknown protein
```

SRNA\_AG01\_SoLexa\_Mi2008\_8\_8512\_hit2

```
5' CGAGAGGAACC-GUUGAUUC
   ||||||||||| || ||||
   UCUCUCCUUGGCCAA-UAAG 5'
AT1G67800.2 1585 1603
unknown protein
```

SRNA\_AG01\_SoLexa\_Mi2008\_8\_8512\_hit2

```
5' CGAGAGGAACC-GUUGAUUC
   ||||||||||| || ||||
   UCUCUCCUUGGCCAA-UAAG 5'
AT1G67800.1 1723 1741
unknown protein
```

SRNA\_AG01\_SoLexa\_Mi2008\_2\_21192\_hit1

```
5' UAGAGACAAAA-ACAACACAGA
   ||||||||||| | ||| ||||
   AUCUCUGUUUUGU-UUGGGUCU 5'
AT1G67850.2 173 193
At1g67850/F12A21_2
```

SRNA\_AG01\_SoLexa\_Mi2008\_2\_21192\_hit1

```
5' UAGAGACAAAA-ACAACACAGA
   ||||||||||| | ||| ||||
   AUCUCUGUUUUGU-UUGGGUCU 5'
AT1G67850.1 187 207
At1g67850/F12A21_2
```

SRNA\_AG01\_SoLexa\_Mi2008\_2\_47860\_hit1

```
5' UUAGGU-C-CCAUGAACUCCGCA
   ||||| | |||||||||||||
   AAUCCAAGAGGUACUUGAGGCGU 5'
AT1G68390.1 1184 1206
hypothetical protein
```

SRNA\_AG01\_SoLexa\_Mi2008\_7\_14062\_hit1

```
5' GAGGAGGAGGAGGUGAACA
   ||||||||||| |||
   CUCCUCCUCCUCCUCCUCC 5'
AT1G68390.1 341 359
hypothetical protein
```

SRNA\_AG01\_SoLexa\_Mi2008\_1\_11574\_hit1

```
5' CUG-AUCGGCCGCAUCCAA-GCC
   ||| ||||||||||| ||||| |||
   GACAUAGCCGCGCAGGUUGCGG 5'
AT1G68390.1 879 901
```

leaves\_1sup\_AG01\_SoLexa\_Mi\_Cell\_2008\_hit\_target\_site.txt  
hypothetical protein

SRNA\_AG01\_SoLexa\_Mi2008\_1\_2360\_hit1  
5' AUAACAAGUCCUGUUGGGUC  
| ||||| |||||  
UCUUGUUCAGGAAAACCCAG 5'  
AT1G68550.1 319 338  
putative AP2 domain transcription factor

SRNA\_AG01\_SoLexa\_Mi2008\_1\_2360\_hit1  
5' AUAACAAGUCCUGUUGGGUC  
| ||||| |||||  
UCUUGUUCAGGAAAACCCAG 5'  
AT1G68550.2 329 348  
putative AP2 domain transcription factor

SRNA\_AG01\_SoLexa\_Mi2008\_2\_50219\_hit1  
5' UUGACAACUGCAAUGUGAUCCUUA  
| ||||| |||||  
AACUGUUGACGUUA-AGGAGGAAU 5'  
AT1G68570.1 1821 1843  
peptide transporter like

SRNA\_AG01\_SoLexa\_Mi2008\_1\_559\_hit1  
5' AAAGUCAACAACACAUGGUCU  
||| | |||||  
UUUC-GUU-GUUGUGUACCAGC 5'  
AT1G68570.1 547 566  
peptide transporter like

SRNA\_AG01\_SoLexa\_Mi2008\_1\_20838\_hit1  
5' UAGAACCAUUUUUUUUGAA  
|| || | |||||  
AU-UUGC UUAAUAAUAACUA 5'  
AT1G68620.1 1274 1293  
putative carboxylesterase

SRNA\_AG01\_SoLexa\_Mi2008\_1\_4194\_hit1  
5' CAAAGGUGUG-AUCAGGAUGGU  
| ||||| || | |||||  
GUUUCCA-ACCUAGUCCUACCA 5'  
AT1G68620.1 675 695  
putative carboxylesterase

SRNA\_AG01\_SoLexa\_Mi2008\_1\_18801\_hit1  
5' UAAUGGAGUUG-AUCACAUGA  
| ||||| || | |||||  
AUUACCUCA-CGUAGUGUACU 5'  
AT1G68875.1 301 320

SRNA\_AG01\_SoLexa\_Mi2008\_4\_21672\_hit1  
5' UAGAGUUGGGUAUGAUAGCUU  
: ||||| || | |||  
GUCUCAACCAUAC-AU-GAA 5'  
AT1G69180.1 582 600  
transcription factor CRC

SRNA\_AG01\_SoLexa\_Mi2008\_1\_35840\_hit2  
5' UGAGACAAUGGUUUG-C-AUA  
| ||||| || | |||  
ACUCUGUUACCAAACCGGUAG 5'  
AT1G69530.2 783 803  
expansin-like protein (AtEXPA1)

leaves\_1sup\_AG01\_SoLexa\_Mi\_Cell\_2008\_hit\_target\_site.txt

SRNA\_AG01\_SoLexa\_Mi2008\_1\_35840\_hit2

5' UGAGACAAUGGUUU-G-CAUA  
 |||  
 ACUCUGUUACCAAACCGGUAG 5'  
 AT1G69530.4 868 888  
 expansin-like protein (AtEXPA1)

SRNA\_AG01\_SoLexa\_Mi2008\_2\_53124\_hit14

5' UUGGUGUGUUUCAGG-UGUA-GA  
 |||  
 CACCACACAAAAGUCCUACAUACU 5'  
 AT1G69930.1 668 691  
 glutathione transferase like protein

SRNA\_AG01\_SoLexa\_Mi2008\_1\_56587\_hit16

5' UUUUGGUGUGUUUCAGG-UGUA  
 | |||  
 ACCACCACACAAAAGUCCUACAU 5'  
 AT1G69930.1 671 693  
 glutathione transferase like protein

SRNA\_AG01\_SoLexa\_Mi2008\_2\_13419\_hit2

5' GAAGAAGAAGAAGACAC-UU  
 |||  
 CUUCUUCUUC-UCUGUGCAA 5'  
 AT1G69930.1 990 1008  
 glutathione transferase like protein

SRNA\_AG01\_SoLexa\_Mi2008\_1\_52644\_hit1

5' UUGGGGAUGUUACAGUUUGUUUU  
 ||| ||| ||| ||| |||  
 AACCC-UACAAAGUCAAAA-AAAA 5'  
 AT1G70160.1 91 111  
 unknown protein

SRNA\_AG01\_SoLexa\_Mi2008\_1\_45596\_hit2

5' UGUGUACA-GGCUAAGAUUCUGG  
 ||| | |||  
 CCACAU-UACCGAUUCUAGACC 5'  
 AT1G72070.1 206 226  
 hypothetical protein

SRNA\_AG01\_SoLexa\_Mi2008\_3\_11483\_hit1

5' CUGAGCGGUGGUCCAUUGGUC  
 |||  
 GACUCGCCACCAGGUAACCAG 5'  
 AT1G72370.2 812 832  
 40S ribosomal protein SA (laminin receptor-like protein)

SRNA\_AG01\_SoLexa\_Mi2008\_1\_20232\_hit22

5' UACGGAUAAAGCCAUCAGAGUG  
 ||| ||| ||| |||  
 AUGCCAUUUCGGUAGU-UCAA 5'  
 AT1G72520.1 1523 1542  
 putative lipxygenase

SRNA\_AG01\_SoLexa\_Mi2008\_11\_14524\_hit19

5' GCCAUUUGUUCUUGAGUAG  
 ||| ||| ||| |||  
 CGGUAAAACAAGAA-U-AUG 5'  
 AT1G72520.1 2064 2080  
 putative lipxygenase

leaves\_1sup\_AG01\_SoLexa\_Mi\_Cell\_2008\_hit\_target\_site.txt

SRNA\_AG01\_SoLexa\_Mi2008\_1\_4981\_hit1

```
5' CAAGUA-UUUAAGCCCAUUUA
   ||||| |||||
   GUUCAUUAAAUCGGGUACAC 5'
AT1G72520.1      2150      2170
putative lipoygenase
```

SRNA\_AG01\_SoLexa\_Mi2008\_1\_20416\_hit2

```
5' UACGUUGAUGAUUAGGUCA
   || |||||
   AU-CAACUACUUAACCAUC 5'
AT1G72520.1      63       80
putative lipoygenase
```

SRNA\_AG01\_SoLexa\_Mi2008\_1\_10750\_hit1

```
5' CUC-AGUGCCUUCUUCGUC
   ||| |||||
   GAGAUACGGAAGUAGAC-CAG 5'
AT1G72680.1      849      869
putative cinnamyl-alcohol dehydrogenase
```

SRNA\_AG01\_SoLexa\_Mi2008\_1\_3\_hit25

```
5' AAAAAA-A-AAAAAAGAAAGA
   ||||| | |||||
   UUUUUUGUCUUUUUCUUUCC 5'
AT1G72730.1      1428     1448
Eukaryotic initiation factor 4A like protein
```

SRNA\_AG01\_SoLexa\_Mi2008\_1\_54673\_hit1

```
5' UUUCAAGUG-GUCCAAACAUUCAG
   ||||| ||| ||||| |||||
   AAAGU-CACACAGGUUUCUUAUAGUC 5'
AT1G72830.3      1238     1261
unknown protein
```

SRNA\_AG01\_SoLexa\_Mi2008\_1\_54673\_hit1

```
5' UUUCAAGUG-GUCCAAACAUUCAG
   ||||| ||| ||||| |||||
   AAAGU-CACACAGGUUUCUUAUAGUC 5'
AT1G72830.1      1314     1337
unknown protein
```

SRNA\_AG01\_SoLexa\_Mi2008\_1\_54673\_hit1

```
5' UUUCAAGUG-GUCCAAACAUUCAG
   ||||| ||| ||||| |||||
   AAAGU-CACACAGGUUUCUUAUAGUC 5'
AT1G72830.2      1317     1340
unknown protein
```

SRNA\_AG01\_SoLexa\_Mi2008\_17\_12252\_hit1

```
5' CUGUGGUGGAACAUGAACUC
   || |||||
   GA-ACCACCUUGUACUUGUG 5'
AT1G72830.3      1391     1410
unknown protein
```

SRNA\_AG01\_SoLexa\_Mi2008\_26\_14509\_hit4

```
5' GCCAAGGAUGACUUGCCGG
   |||||
   CGGUUCCUACUGAA-GGGG 5'
AT1G72830.3      1413     1430
unknown protein
```

leaves\_1sup\_AG01\_SoLexa\_Mi\_Cell\_2008\_hit\_target\_site.txt

SRNA\_AG01\_SoLexa\_Mi2008\_4\_2048\_hit4

5' AGCCAAGGAUGACUUGCCGG  
|||||  
UCGGUCCUACUGAA-GGGG 5'  
AT1G72830.3 1413 1431  
unknown protein

SRNA\_AG01\_SoLexa\_Mi2008\_400\_22176\_hit7

5' UAGCCAAGGAUGACUUGCCUG  
|||||  
AUCGGUCCUACUGAA-GGGG 5'  
AT1G72830.3 1413 1432  
unknown protein

SRNA\_AG01\_SoLexa\_Mi2008\_2\_15465\_hit6

5' GUAGCCAAGGAUGACUUGCCUG  
|||||  
CAUCGGUCCUACUGAA-GGGG 5'  
AT1G72830.3 1413 1433  
unknown protein

SRNA\_AG01\_SoLexa\_Mi2008\_78\_6282\_hit3

5' CAGCCAAGGAUGACUUGCCG  
|||||  
UUCGGUCCUACUGAA-GGG 5'  
AT1G72830.3 1414 1432  
unknown protein

SRNA\_AG01\_SoLexa\_Mi2008\_9\_22175\_hit7

5' UAGCCAAGGAUGACUUGCCU  
|||||  
AUCGGUCCUACUGAA-GGG 5'  
AT1G72830.3 1414 1432  
unknown protein

SRNA\_AG01\_SoLexa\_Mi2008\_20\_6281\_hit3

5' CAGCCAAGGAUGACUUGCC  
|||||  
UUCGGUCCUACUGAA-GG 5'  
AT1G72830.3 1415 1432  
unknown protein

SRNA\_AG01\_SoLexa\_Mi2008\_7\_22174\_hit7

5' UAGCCAAGGAUGACUUGCC  
|||||  
AUCGGUCCUACUGAA-GG 5'  
AT1G72830.3 1415 1432  
unknown protein

SRNA\_AG01\_SoLexa\_Mi2008\_1\_28302\_hit1

5' UCAGCCAAGGAUGACUUGCC  
: |||||  
GUUCGGUCCUACUGAA-GG 5'  
AT1G72830.3 1415 1433  
unknown protein

SRNA\_AG01\_SoLexa\_Mi2008\_4\_36086\_hit4

5' UGAGCCAAGGAUGACUUGCC  
: |||||  
GUUCGGUCCUACUGAA-GG 5'  
AT1G72830.3 1415 1433  
unknown protein

leaves\_1sup\_AG01\_SoLexa\_Mi\_Cell\_2008\_hit\_target\_site.txt

SRNA\_AG01\_SoLexa\_Mi2008\_17\_12252\_hit1  
5' CUGUGGUGGGAACAUGAACUC  
|| |||||  
GA-ACCACCCUUGUACUUGUG 5'  
AT1G72830.1 1467 1486  
unknown protein

SRNA\_AG01\_SoLexa\_Mi2008\_17\_12252\_hit1  
5' CUGUGGUGGGAACAUGAACUC  
|| |||||  
GA-ACCACCCUUGUACUUGUG 5'  
AT1G72830.2 1470 1489  
unknown protein

SRNA\_AG01\_SoLexa\_Mi2008\_26\_14509\_hit4  
5' GCCAAGGAUGACUUGCCGG  
|||  
CGGUUCCUACUGAA-GGGG 5'  
AT1G72830.1 1489 1506  
unknown protein

SRNA\_AG01\_SoLexa\_Mi2008\_4\_2048\_hit4  
5' AGCCAAGGAUGACUUGCCGG  
|||  
UCGGUCCUACUGAA-GGGG 5'  
AT1G72830.1 1489 1507  
unknown protein

SRNA\_AG01\_SoLexa\_Mi2008\_400\_22176\_hit7  
5' UAGCCAAGGAUGACUUGCCUG  
|||  
AUCGGUCCUACUGAA-GGGG 5'  
AT1G72830.1 1489 1508  
unknown protein

SRNA\_AG01\_SoLexa\_Mi2008\_2\_15465\_hit6  
5' GUAGCCAAGGAUGACUUGCCUG  
|||  
CAUCGGUCCUACUGAA-GGGG 5'  
AT1G72830.1 1489 1509  
unknown protein

SRNA\_AG01\_SoLexa\_Mi2008\_78\_6282\_hit3  
5' CAGCCAAGGAUGACUUGCCG  
|||  
UUCGGUCCUACUGAA-GGG 5'  
AT1G72830.1 1490 1508  
unknown protein

SRNA\_AG01\_SoLexa\_Mi2008\_9\_22175\_hit7  
5' UAGCCAAGGAUGACUUGCCU  
|||  
AUCGGUCCUACUGAA-GGG 5'  
AT1G72830.1 1490 1508  
unknown protein

SRNA\_AG01\_SoLexa\_Mi2008\_20\_6281\_hit3  
5' CAGCCAAGGAUGACUUGCC  
|||  
UUCGGUCCUACUGAA-GG 5'  
AT1G72830.1 1491 1508  
unknown protein

leaves\_1sup\_AG01\_SoLexa\_Mi\_Cell\_2008\_hit\_target\_site.txt

SRNA\_AG01\_SoLexa\_Mi2008\_7\_22174\_hit7  
 5' UAGCCAAGGAUGACUUGCC  
 |||  
 AUCGGUCCUACUGAA-GG 5'  
 AT1G72830.1 1491 1508  
 unknown protein

SRNA\_AG01\_SoLexa\_Mi2008\_1\_28302\_hit1  
 5' UCAGCCAAGGAUGACUUGCC  
 :|||  
 GUUCGGUCCUACUGAA-GG 5'  
 AT1G72830.1 1491 1509  
 unknown protein

SRNA\_AG01\_SoLexa\_Mi2008\_4\_36086\_hit4  
 5' UGAGCCAAGGAUGACUUGCC  
 ::|||  
 GUUCGGUCCUACUGAA-GG 5'  
 AT1G72830.1 1491 1509  
 unknown protein

SRNA\_AG01\_SoLexa\_Mi2008\_26\_14509\_hit4  
 5' GCCAAGGAUGACUUGCCGG  
 |||  
 CGGUCCUACUGAA-GGGG 5'  
 AT1G72830.2 1492 1509  
 unknown protein

SRNA\_AG01\_SoLexa\_Mi2008\_4\_2048\_hit4  
 5' AGCCAAGGAUGACUUGCCGG  
 |||  
 UCGGUCCUACUGAA-GGGG 5'  
 AT1G72830.2 1492 1510  
 unknown protein

SRNA\_AG01\_SoLexa\_Mi2008\_400\_22176\_hit7  
 5' UAGCCAAGGAUGACUUGCCUG  
 |||  
 AUCGGUCCUACUGAA-GGGG 5'  
 AT1G72830.2 1492 1511  
 unknown protein

SRNA\_AG01\_SoLexa\_Mi2008\_2\_15465\_hit6  
 5' GUAGCCAAGGAUGACUUGCCUG  
 |||  
 CAUCGGUCCUACUGAA-GGGG 5'  
 AT1G72830.2 1492 1512  
 unknown protein

SRNA\_AG01\_SoLexa\_Mi2008\_78\_6282\_hit3  
 5' CAGCCAAGGAUGACUUGCCG  
 |||  
 UUCGGUCCUACUGAA-GGG 5'  
 AT1G72830.2 1493 1511  
 unknown protein

SRNA\_AG01\_SoLexa\_Mi2008\_9\_22175\_hit7  
 5' UAGCCAAGGAUGACUUGCCU  
 |||  
 AUCGGUCCUACUGAA-GGG 5'  
 AT1G72830.2 1493 1511  
 unknown protein

leaves\_1sup\_AG01\_SoLexa\_Mi\_Cell\_2008\_hit\_target\_site.txt

SRNA\_AG01\_SoLexa\_Mi2008\_20\_6281\_hit3  
5' CAGCCAAGGAUGACUUGCC  
|||||||  
UUCGGUCCUACUGAA-GG 5'  
AT1G72830.2 1494 1511  
unknown protein

SRNA\_AG01\_SoLexa\_Mi2008\_7\_22174\_hit7  
5' UAGCCAAGGAUGACUUGCC  
|||||||  
AUCGGUCCUACUGAA-GG 5'  
AT1G72830.2 1494 1511  
unknown protein

SRNA\_AG01\_SoLexa\_Mi2008\_1\_28302\_hit1  
5' UCAGCCAAGGAUGACUUGCC  
: |||||  
GUUCGGUCCUACUGAA-GG 5'  
AT1G72830.2 1494 1512  
unknown protein

SRNA\_AG01\_SoLexa\_Mi2008\_4\_36086\_hit4  
5' UGAGCCAAGGAUGACUUGCC  
::|||  
GUUCGGUCCUACUGAA-GG 5'  
AT1G72830.2 1494 1512  
unknown protein

SRNA\_AG01\_SoLexa\_Mi2008\_5\_24767\_hit1  
5' UAUCAAAAGAAUCAU-UGCACU  
||||| |||||  
AUAGUCUUCUUAGUAUA-GUGA 5'  
AT1G72830.3 1579 1599  
unknown protein

SRNA\_AG01\_SoLexa\_Mi2008\_5\_24767\_hit1  
5' UAUCAAAAGAAUCAU-UGCACU  
||||| |||||  
AUAGUCUUCUUAGUAUA-GUGA 5'  
AT1G72830.1 1655 1675  
unknown protein

SRNA\_AG01\_SoLexa\_Mi2008\_5\_24767\_hit1  
5' UAUCAAAAGAAUCAU-UGCACU  
||||| |||||  
AUAGUCUUCUUAGUAUA-GUGA 5'  
AT1G72830.2 1658 1678  
unknown protein

SRNA\_AG01\_SoLexa\_Mi2008\_1\_2\_hit38  
5' AAAAAAAAAA-AAAAACCAU  
||||||| |||||  
UUUUUUUUUGUUUUU-GUA 5'  
AT1G72940.1 1448 1466  
unknown protein

SRNA\_AG01\_SoLexa\_Mi2008\_1\_1763\_hit2  
5' ACUCCAGGACCAAACCACGU  
||||||| |||||  
UGAAGGGCCUGGUUUGG-GCA 5'  
AT1G72940.1 930 949  
unknown protein

leaves\_1sup\_AG01\_SoLexa\_Mi\_Cell\_2008\_hit\_target\_site.txt

SRNA\_AG01\_SoLexa\_Mi2008\_26\_20692\_hit2

5' UACUCCAGGACCAAACCACGU  
 ||||| |||||  
 CUGAAGGGCCUGGUUUGG-GCA 5'  
 AT1G72940.1 930 950  
 unknown protein

SRNA\_AG01\_SoLexa\_Mi2008\_12\_20691\_hit2

5' UACUCCAGGACCAAACCACG  
 ||||| |||||  
 CUGAAGGGCCUGGUUUGG-GC 5'  
 AT1G72940.1 931 950  
 unknown protein

SRNA\_AG01\_SoLexa\_Mi2008\_1\_38353\_hit4

5' UGCCAAGGAGUCGCAACUCCGA  
 ||||| |||||  
 ACGGU-C-UCAGCGUUCAGGCU 5'  
 AT1G73260.1 631 650  
 putative trypsin inhibitor (At1g73260)

SRNA\_AG01\_SoLexa\_Mi2008\_10\_30419\_hit1

5' UCGAACGCUUCACGGAUCUCUA  
 |||||  
 AGCUUGCGAAGUGCCUAGAGAU 5'  
 AT1G73630.1 274 295  
 calmodulin like protein

SRNA\_AG01\_SoLexa\_Mi2008\_1\_3\_hit25

5' AAA-AAAAAAAAAGAAAGA  
 ||| |||||  
 UUUUUUUUUUUUCUUUGU 5'  
 AT1G73630.1 612 631  
 calmodulin like protein

SRNA\_AG01\_SoLexa\_Mi2008\_1\_3\_hit25

5' AAAAAAA-AAAAAGAAAGA  
 ||||| |||||:|||||  
 UUUUUUUUCUUUUUUUUUCU 5'  
 AT1G73630.1 616 635  
 calmodulin like protein

SRNA\_AG01\_SoLexa\_Mi2008\_1\_3\_hit25

5' AAAAAAAA-AAAAAGAAAGA  
 ||||| ||||| |||:  
 UUUUUUUUCUUUUU-UUUUU 5'  
 AT1G73630.1 618 636  
 calmodulin like protein

SRNA\_AG01\_SoLexa\_Mi2008\_1\_3\_hit25

5' AAAAAAAA-AAAAGAAAGA  
 ||||| ||||| |||:  
 UUUUUUUUUUCUUUU-UUUUU 5'  
 AT1G73630.1 619 637  
 calmodulin like protein

SRNA\_AG01\_SoLexa\_Mi2008\_1\_1776\_hit10

5' AGAAAAAAAAAA-AAAAAAAAU  
 ||||| |||||  
 GCUUUUUUUUUUCUUUUUUUU 5'  
 AT1G73630.1 619 640  
 calmodulin like protein

leaves\_1sup\_AG01\_SoLexa\_Mi\_Cell\_2008\_hit\_target\_site.txt

SRNA\_AG01\_SoLexa\_Mi2008\_1\_3\_hit25

5' AAAAAAAAAA-AAAGAAAGA  
||||| ||| ||:|  
UUUUUUUUUCUUU-UUUUU 5'  
AT1G73630.1 620 638  
calmodulin like protein

SRNA\_AG01\_SoLexa\_Mi2008\_10\_14179\_hit22

5' GAUAGGUGUGUAUGUGAGAAG  
||||| ||| |||  
CUAUCCACAAAUACAC-CUUG 5'  
AT1G74210.1 1263 1282  
glycerophosphodiester phosphodiesterase like protein

SRNA\_AG01\_SoLexa\_Mi2008\_16\_36976\_hit22

5' UGAUAGGUGUGUAUGUGAGAA  
||||| ||| |||  
ACUAUCCACAAAUACAC-CUU 5'  
AT1G74210.1 1264 1283  
glycerophosphodiester phosphodiesterase like protein

SRNA\_AG01\_SoLexa\_Mi2008\_4\_36977\_hit1

5' UGAUAGGUGUGUAUGUGGGAA  
||||| ||| |||  
ACUAUCCACAAAUACA-CCUU 5'  
AT1G74210.1 1264 1283  
glycerophosphodiester phosphodiesterase like protein

SRNA\_AG01\_SoLexa\_Mi2008\_1\_51006\_hit22

5' UUGAUAGGUGUGUAUGUGAGAA  
||||| ||| |||  
CACUAUCCACAAAUACAC-CUU 5'  
AT1G74210.1 1264 1284  
glycerophosphodiester phosphodiesterase like protein

SRNA\_AG01\_SoLexa\_Mi2008\_1\_51005\_hit24

5' UUGAUAGGUGUGUAUGUGAGA  
||||| ||| |||  
CACUAUCCACAAAUACAC-CU 5'  
AT1G74210.1 1265 1284  
glycerophosphodiester phosphodiesterase like protein

SRNA\_AG01\_SoLexa\_Mi2008\_3\_53844\_hit1

5' UUGUUUCGUGGAGAAUA-AAU  
||||| ||| |||  
AACAAAGCAGCUCUUAUGUUA 5'  
AT1G74210.1 357 377  
glycerophosphodiester phosphodiesterase like protein

SRNA\_AG01\_SoLexa\_Mi2008\_1\_36898\_hit1

5' UGAGUUGGAUGAUGAUGAUGA  
|||| | ||| ||| ||| ||| |||  
ACUCA-C-UACUACUACUACU 5'  
AT1G74450.1 100 118  
unknown protein

SRNA\_AG01\_SoLexa\_Mi2008\_1\_3079\_hit472

5' AUGAUGA-UGAUGAUGAUGAUGA  
||| || ||| ||| ||| ||| ||| |||  
GACU-CUCACUACUACUACU 5'  
AT1G74450.1 100 121  
unknown protein

leaves\_1sup\_AG01\_Solexa\_Mi\_Cell\_2008\_hit\_target\_site.txt

SRNA\_AG01\_Solexa\_Mi2008\_1\_36323\_hit13

5' UGAG-GA-UGAUGAUGAUGAUGA  
 ||||| || |||||||||  
 ACUCUCUCACUACUACUACU 5'  
 AT1G74450.1 100 122  
 unknown protein

SRNA\_AG01\_Solexa\_Mi2008\_1\_14208\_hit2

5' GAUCGAUAAACCUCUGCAUC  
 ||||||| ||| |  
 CUAGCUAUUUGGAGA-GUCG 5'  
 AT1G74450.1 376 394  
 unknown protein

SRNA\_AG01\_Solexa\_Mi2008\_3\_8704\_hit1

5' CGAUCGAUAAACCUCUGCAU  
 ||||||| ||| |  
 ACUAGCUAUUUGGAGA-GUC 5'  
 AT1G74450.1 377 395  
 unknown protein

SRNA\_AG01\_Solexa\_Mi2008\_2\_21756\_hit1

5' UAGAUCGAUAAACCUCUGCAU  
 :||||||| ||| |  
 GUCUAGCUAUUUGGAGA-GUC 5'  
 AT1G74450.1 377 396  
 unknown protein

SRNA\_AG01\_Solexa\_Mi2008\_1\_37225\_hit4

5' UGA-UGAUGAUGAUGAUGAAGAAG  
 ||| ||||||||| ||| |  
 ACUCACUACUACUACUACU-UUA 5'  
 AT1G74450.1 96 118  
 unknown protein

SRNA\_AG01\_Solexa\_Mi2008\_1\_2280\_hit1

5' AGUGGAUGAUGAUGAUGAUGAUG  
 ||||| ||||||||| :  
 UCAC-UACUACUACUACUUU 5'  
 AT1G74450.1 98 116  
 unknown protein

SRNA\_AG01\_Solexa\_Mi2008\_2\_52\_hit1

5' AAAAAAGAGAGAUACAGAGAU  
 ||||||||| |||||  
 UUUUUUCUCUCUAU--CUCUA 5'  
 AT1G74470.1 1520 1538  
 geranylgeranyl reductase

SRNA\_AG01\_Solexa\_Mi2008\_1\_1240\_hit2

5' ACAA-AUAUUUAUAUGAUAU  
 ||| || |||||||||  
 AGUUCUA-AAAUAUACUUA 5'  
 AT1G74670.1 524 542  
 GAST1-like protein

SRNA\_AG01\_Solexa\_Mi2008\_1\_22575\_hit1

5' UAGGAAAACAAGAAGAU-GAUGAAG  
 ||||| ||||||| || |||||  
 AUCCUUGUGUUCU-UAACUACUUC 5'  
 AT1G74790.1 154 177  
 Hedgehog-Interacting-Protein-like (HIPL1)



leaves\_1sup\_AG01\_SoLexa\_Mi\_Cell\_2008\_hit\_target\_site.txt

SRNA\_AG01\_SoLexa\_Mi2008\_1\_39825\_hit1  
5' UGGAAUAGAAGAGACCUG-G-UC  
|||  
ACCUUAUCUUCUCUUGACUCGAG 5'  
AT1G75670.2 210 232  
unknown protein

SRNA\_AG01\_SoLexa\_Mi2008\_6\_14366\_hit1  
5' GAUGUUGAGGUUUUAUGAUGA  
||||| |||  
AUACAA-UC-AUAAUACUACU 5'  
AT1G75670.2 816 834  
unknown protein

SRNA\_AG01\_SoLexa\_Mi2008\_6\_13422\_hit1  
5' GAAGAAGAAGAUGAUUAAGGA  
|||||  
CUUCUUCUUCUA--AAUUCU 5'  
AT1G75800.1 80 98  
thaumatin, putative

SRNA\_AG01\_SoLexa\_Mi2008\_1\_27366\_hit1  
5' UCAAUAAGUCACGGCGU-CUCAUC  
||| |||  
AGUUCUUCAGUGCCGCACAAGUAG 5'  
AT1G76130.1 496 519  
alpha-amylase like protein

SRNA\_AG01\_SoLexa\_Mi2008\_3\_779\_hit1  
5' AAGAAUAUAAGUGUAGUUA  
|||||  
UUCUUACAUCACAUCAAG 5'  
AT1G76160.1 439 457  
unknown protein

SRNA\_AG01\_SoLexa\_Mi2008\_1\_44461\_hit2  
5' UGUCAAGAUGGUCCAACAUGA  
||| |||  
ACA-UUCUAACAGGUUGUACU 5'  
AT1G76160.1 872 891  
unknown protein

SRNA\_AG01\_SoLexa\_Mi2008\_1\_49672\_hit1  
5' UUCUACAGCAAAAAAUCUAUUA  
|| |||  
AA-AUGUCGUUUUUUGAUUA 5'  
AT1G76590.1 1135 1155  
unknown protein

SRNA\_AG01\_SoLexa\_Mi2008\_3\_4962\_hit3  
5' CAAGUAAUAACAUUUAAACCU  
|||||  
GUUCAUUAGUGUAAAUUGCC 5'  
AT1G76590.1 773 792  
unknown protein

SRNA\_AG01\_SoLexa\_Mi2008\_21\_8641\_hit2  
5' CGAGUCAGCAUCCAGAACCUA  
||| |||  
GCUAAGUC-UAAGGUCUUGGAC 5'  
AT1G76600.1 202 222  
unknown protein

leaves\_1sup\_AG01\_SoLexa\_Mi\_Cell\_2008\_hit\_target\_site.txt

SRNA\_AG01\_SoLexa\_Mi2008\_1\_37225\_hit4

5' UGAUGAUGAUGAUGAUGAAGAAG  
|||||  
UCUACUACUACUACUUCUUCUUC 5'  
AT1G76600.1 226 248  
unknown protein

SRNA\_AG01\_SoLexa\_Mi2008\_3\_13421\_hit1

5' GAAGAAGAAGAUGAUGUUGAU  
|||||  
AUUCUUCUUCUACUACUACUA 5'  
AT1G76600.1 236 256  
unknown protein

SRNA\_AG01\_SoLexa\_Mi2008\_1\_53872\_hit1

5' UUUAA-AAUGAAGAUGAUGAUGA  
||||| || |||||  
AAAUUCUU-CUUCUACUACUACU 5'  
AT1G76600.1 238 259  
unknown protein

SRNA\_AG01\_SoLexa\_Mi2008\_2\_368\_hit1

5' AAAGAAUGAGAGAAUGA-GAU  
||||| ||| |||  
GUUCUUACUCUCACUACUA 5'  
AT1G77640.1 101 121  
hypothetical protein

SRNA\_AG01\_SoLexa\_Mi2008\_19\_11133\_hit1

5' CUC-GGUGGUGAAGAUGCAG  
|| |||||  
AAGACCACCACUUCUACGUC 5'  
AT1G77640.1 544 563  
hypothetical protein

SRNA\_AG01\_SoLexa\_Mi2008\_1\_351\_hit2

5' AAAGAAGAAAA-ACAGAUCU  
||||| || |||||  
GUUCUUCUUUUGU-UCUAGA 5'  
AT1G77680.1 121 139  
putative 3'-5' exoribonuclease, 3' partial

SRNA\_AG01\_SoLexa\_Mi2008\_9\_5201\_hit2

5' CAAUGUCUUGCUGUAAUGCUG  
||| ||||| |||||  
GUU-CAGAACGAGAUUACGAA 5'  
AT1G77680.1 1491 1510  
putative 3'-5' exoribonuclease, 3' partial

SRNA\_AG01\_SoLexa\_Mi2008\_1\_6621\_hit1

5' CAGGUGAAG-AAGUAACGU  
||||| ||| |||||  
GUCCACUUCUUC-AUUGCC 5'  
AT1G77680.1 631 649  
putative 3'-5' exoribonuclease, 3' partial

SRNA\_AG01\_SoLexa\_Mi2008\_2\_8245\_hit1

5' CGAA-AAGAAGAAGAUGAUGAG  
|||| ||||| |||||:  
GCUUAAUUCUUCUUCUACUU 5'  
AT1G77680.1 82 103  
putative 3'-5' exoribonuclease, 3' partial

leaves\_1sup\_AG01\_SoLexa\_Mi\_Cell\_2008\_hit\_target\_site.txt

SRNA\_AG01\_SoLexa\_Mi2008\_2\_10380\_hit1

5' CUAGUGGACCUUUGAUAUACUA  
|||||  
GAUCACCUGGAAACUAUAGAU 5'  
AT1G77760.1 2356 2376  
nitrate reductase 1 (NR1)

SRNA\_AG01\_SoLexa\_Mi2008\_1\_39739\_hit2

5' UGGAAGAU-GGAGUGAUGCCUC  
||| |||||  
ACCAUCUAUCCUCACUACGGAC 5'  
AT1G77760.1 2465 2486  
nitrate reductase 1 (NR1)

SRNA\_AG01\_SoLexa\_Mi2008\_93\_9914\_hit1

5' CUACCAGCCGUUGA-UCAUGCU  
||| |||||  
GAUAGUCGGCAACUAAGUA-GA 5'  
AT1G77760.1 384 404  
nitrate reductase 1 (NR1)

SRNA\_AG01\_SoLexa\_Mi2008\_3\_13312\_hit1

5' GAAAAAGGUGGAGAGAUAAAG  
|||||  
AUUUUUC-ACCUCUCU-UUC 5'  
AT1G77840.1 260 277  
putative eukaryotic translation initiation factor 5 (EIF-5) sp|P48724; similar to  
ESTs emb|F19992, gb|N96933, emb|Z33699, emb|F19991

SRNA\_AG01\_SoLexa\_Mi2008\_1\_20688\_hit1

5' UACUUCACGGUGGUUGAUGUC  
|||||  
AUGAAGUGCCACCAACUACAG 5'  
AT1G77850.1 119 139  
putative auxin response factor protein (T32E8.16)

SRNA\_AG01\_SoLexa\_Mi2008\_10\_11960\_hit1

5' CUGGCUCCUGUAUGCCAU  
|||||:|||||  
GACCGAGGGACGUACGGUC 5'  
AT1G77850.1 1407 1425  
putative auxin response factor protein (T32E8.16)

SRNA\_AG01\_SoLexa\_Mi2008\_4\_38719\_hit2

5' UGCCUGGCUCCUGUAUGCCAC  
|||||:|||||  
ACGGACCGAGGGACGUACGGUC 5'  
AT1G77850.1 1407 1428  
putative auxin response factor protein (T32E8.16)

SRNA\_AG01\_SoLexa\_Mi2008\_2\_38720\_hit1

5' UGCCUGGCUCCUGUAUGCCAU  
|||||:|||||  
ACGGACCGAGGGACGUACGGUC 5'  
AT1G77850.1 1407 1428  
putative auxin response factor protein (T32E8.16)

SRNA\_AG01\_SoLexa\_Mi2008\_35\_8196\_hit3

5' CCUGGCUCCUGUAUGCCA  
|||||:|||||  
GGACCGAGGGACGUACGGU 5'  
AT1G77850.1 1408 1426

putative auxin response factor protein (T32E8.16)

SRNA\_AG01\_SoLexa\_Mi2008\_141\_14646\_hit3

5' GCCUGGCUCCUGUAUGCCA  
|||||||:|||||||  
CGGACCGAGGGACGUACGGU 5'

AT1G77850.1 1408 1427  
putative auxin response factor protein (T32E8.16)

SRNA\_AG01\_SoLexa\_Mi2008\_12\_38715\_hit1

5' UGCCUGGCUCCUGCAUGCCA  
|||||||:|||||||  
ACGGACCGAGGGACGUACGGU 5'

AT1G77850.1 1408 1428  
putative auxin response factor protein (T32E8.16)

SRNA\_AG01\_SoLexa\_Mi2008\_7192\_38718\_hit3

5' UGCCUGGCUCCUGUAUGCCA  
|||||||:|||||||  
ACGGACCGAGGGACGUACGGU 5'

AT1G77850.1 1408 1428  
putative auxin response factor protein (T32E8.16)

SRNA\_AG01\_SoLexa\_Mi2008\_37\_3172\_hit2

5' AUGCCUGGCUCCUGUAUGCCA  
|||||||:|||||||  
AACGGACCGAGGGACGUACGGU 5'

AT1G77850.1 1408 1429  
putative auxin response factor protein (T32E8.16)

SRNA\_AG01\_SoLexa\_Mi2008\_83\_38717\_hit3

5' UGCCUGGCUCCUGUAUGCC  
|||||||:|||||||  
ACGGACCGAGGGACGUACGG 5'

AT1G77850.1 1409 1428  
putative auxin response factor protein (T32E8.16)

SRNA\_AG01\_SoLexa\_Mi2008\_183\_3171\_hit2

5' AUGCCUGGCUCCUGUAUGCC  
|||||||:|||||||  
AACGGACCGAGGGACGUACGG 5'

AT1G77850.1 1409 1429  
putative auxin response factor protein (T32E8.16)

SRNA\_AG01\_SoLexa\_Mi2008\_1\_25516\_hit2

5' UAU-GCCUGGCUCCUGUAUGCCA  
||| |||||:|||||||  
AUAACGGACCGAGGGACGUACGGU 5'

AT1G77850.1 1409 1432  
putative auxin response factor protein (T32E8.16)

SRNA\_AG01\_SoLexa\_Mi2008\_296\_38716\_hit3

5' UGCCUGGCUCCUGUAUGC  
|||||||:|||||||  
ACGGACCGAGGGACGUACG 5'

AT1G77850.1 1410 1428  
putative auxin response factor protein (T32E8.16)

SRNA\_AG01\_SoLexa\_Mi2008\_5\_3170\_hit2

5' AUGCCUGGCUCCUGUAUGC  
|||||||:|||||||  
AACGGACCGAGGGACGUACG 5'

AT1G77850.1 1410 1429

putative auxin response factor protein (T32E8.16)

SRNA\_AG01\_SoLexa\_Mi2008\_4\_25515\_hit2

5' UAU-GCCUGGCUCCUGUAUGCC  
||| |||||||||||||||:|||||  
AUAACGGACCGAGGGACGUACGG 5'

AT1G77850.1 1410 1432  
putative auxin response factor protein (T32E8.16)

SRNA\_AG01\_SoLexa\_Mi2008\_7\_48235\_hit1

5' UUAU-GCCUGGCUCCUGUAUG  
||| |||||||||||||||:|||  
AAUAACGGACCGAGGGACGUAC 5'

AT1G77850.1 1412 1433  
putative auxin response factor protein (T32E8.16)

SRNA\_AG01\_SoLexa\_Mi2008\_31\_5258\_hit1

5' CA-CAAAGAACCACCAC-UCU  
|| |||||| |||||| |||  
GUCGUUUCUAGGUGGUGAAGA 5'

AT1G77850.1 1859 1879  
putative auxin response factor protein (T32E8.16)

SRNA\_AG01\_SoLexa\_Mi2008\_1\_1991\_hit1

5' AGAUUUUAUUAUUUUUAGU  
||| |||||| ||||||  
UCU-UAAUUAUUAUUUAUCA 5'

AT1G77850.1 1911 1928  
putative auxin response factor protein (T32E8.16)

SRNA\_AG01\_SoLexa\_Mi2008\_1\_3\_hit25

5' AAAAAAAAAA-AAAGAAAGA  
||| |||||| ||||||  
UUUUUUUUUUUCUUUCUUUCA 5'

AT1G77850.1 1989 2008  
putative auxin response factor protein (T32E8.16)

SRNA\_AG01\_SoLexa\_Mi2008\_1\_3\_hit25

5' AAAAAAAAAAAAAAGAAAGA  
| |||||| ||||||  
CUAUUUUUUUUUUCUUUCU 5'

AT1G77850.1 1992 2010  
putative auxin response factor protein (T32E8.16)

SRNA\_AG01\_SoLexa\_Mi2008\_1\_8247\_hit1

5' CGAA-AAGAGGUAGCUACUGUU  
||| |||||| ||||||  
ACUUCUUCUCAUCAUGACAA 5'

AT1G77850.1 27 48  
putative auxin response factor protein (T32E8.16)

SRNA\_AG01\_SoLexa\_Mi2008\_1\_56164\_hit1

5' UUUGUGUGUGUGUAGUGAAUUA  
||| |||||| ||||||  
AAACACACACAUCAUUAU 5'

AT1G78080.1 17 38  
putative AP2 domain containing protein (At1g78080)

SRNA\_AG01\_SoLexa\_Mi2008\_4\_21464\_hit1

5' UAGAGGU-AGAGAUAGAUUA  
||| ||| ||||||  
AUCUC-ACUCUCUAUCUAUC 5'

AT1G78580.1 41 59

leaves\_1sup\_AG01\_SoLexa\_Mi\_Cell\_2008\_hit\_target\_site.txt  
trehalose-6-phosphate synthase

SRNA\_AG01\_SoLexa\_Mi2008\_1\_50384\_hit1  
5' UUGACGGACGAAGUAAGUGGA  
|||||  
AACUGCCUGCUUCAUUCACCU 5'  
AT1G78830.1 1016 1036  
unknown protein (At1g78830)

SRNA\_AG01\_SoLexa\_Mi2008\_1\_22802\_hit1  
5' UAGGAUCGGCAAGUACAUGGU  
|||||  
AUCCUAGCCGUUCAUGUACCA 5'  
AT1G78895.1 750 770  
unknown protein

SRNA\_AG01\_SoLexa\_Mi2008\_1\_16975\_hit2  
5' UAAAUAAAGUAAAUG-UUUUACUA  
||||| || || ||  
AUUUUUUCAUUUACUAAUUA-AU 5'  
AT1G78970.2 2342 2363  
unknown protein

SRNA\_AG01\_SoLexa\_Mi2008\_1\_16975\_hit2  
5' UAAAUAAAGUAAAUG-UUUUACUA  
||||| || || ||  
AUUUUUUCAUUUACUAAUUA-AU 5'  
AT1G78970.1 2507 2528  
unknown protein

SRNA\_AG01\_SoLexa\_Mi2008\_2\_15621\_hit2  
5' GUCAUAUGCUUGUCUCAAAGA  
|||:| |||||  
AAGUGU-CGAACAGAGUUUCU 5'  
AT1G79560.1 2073 2092  
FtsH like cell division protein

SRNA\_AG01\_SoLexa\_Mi2008\_1\_5313\_hit2  
5' CACACGCAAU-AAAGUAGACAAG  
||||| |||| |||||  
GUGUGCGUUAGUUUC-UCUGUUA 5'  
AT1G80160.1 658 679  
unknown protein

SRNA\_AG01\_SoLexa\_Mi2008\_1\_5313\_hit2  
5' CACACGCAAU-AAAGUAGACAAG  
||||| |||| |||||  
GUGUGCGUUAGUUUC-UCUGUUA 5'  
AT1G80160.2 756 777  
unknown protein

SRNA\_AG01\_SoLexa\_Mi2008\_1\_14331\_hit2  
5' GAUGGUGAACUUAU-GCCUGA  
||||| | |||  
CUACCACUUGAUAGC-GACG 5'  
AT1G80170.1 1163 1181  
putative polygalacturonase

SRNA\_AG01\_SoLexa\_Mi2008\_3\_8768\_hit1  
5' CGCAGUUG-CAGAGAUGAUGUC  
||||| | ||||| |  
GCGUCA-CAGUCUCUACUACCG 5'  
AT1G80170.1 916 936

leaves\_1sup\_AG01\_SoLexa\_Mi\_Cell\_2008\_hit\_target\_site.txt  
putative polygalacturonase

SRNA\_AG01\_SoLexa\_Mi2008\_17\_5479\_hit1  
5' CACCAUGGAAAGGCUGAAG  
    ||||| |||||  
    UCGGUACCCUCCGACUUC 5'  
AT1G80300.1    167    185  
adenine nucleotide translocase

SRNA\_AG01\_SoLexa\_Mi2008\_2\_17207\_hit1  
5' UAACACCACCAAGAC-UCCU  
    ||||| |||||  
    CGUGUGGUGGUUCUGUAGGA 5'  
AT1G80300.1    508    527  
adenine nucleotide translocase

SRNA\_AG01\_SoLexa\_Mi2008\_4\_297\_hit1  
5' AAACAUGAUUGGUA-ACAAUA  
    ||||| |||||  
    UUUGUACUAACC-UGUGUUAC 5'  
AT1G80950.1    745    764  
unknown protein

SRNA\_AG01\_SoLexa\_Mi2008\_2\_49752\_hit2  
5' UUCUCUACAAACUUUCCACA  
    ||||| || |||||  
    AAGAGAAGUAUGAAAAGGGUGA 5'  
AT2G01100.3    1184    1205  
unknown protein

SRNA\_AG01\_SoLexa\_Mi2008\_1\_26541\_hit2  
5' UCAAAAACAAAGAGAGUAAUA  
    ||||| |||||:|||||  
    CGUUUUUGUGUCUCUGAUUUAU 5'  
AT2G01100.3    189    210  
unknown protein

SRNA\_AG01\_SoLexa\_Mi2008\_1\_23619\_hit1  
5' UAGUAAUCUACAUGAUGGUUAU  
    :|||| |||||  
    GUCAU-AGAUGUACUACCAUU 5'  
AT2G01100.3    440    459  
unknown protein

SRNA\_AG01\_SoLexa\_Mi2008\_2\_49752\_hit2  
5' UUCUCUACAAACUUUCCACA  
    ||||| || |||||  
    AAGAGAAGUAUGAAAAGGGUGA 5'  
AT2G01100.1    768    789  
unknown protein

SRNA\_AG01\_SoLexa\_Mi2008\_2\_49752\_hit2  
5' UUCUCUACAAACUUUCCACA  
    ||||| || |||||  
    AAGAGAAGUAUGAAAAGGGUGA 5'  
AT2G01100.2    803    824  
unknown protein

SRNA\_AG01\_SoLexa\_Mi2008\_8\_4655\_hit1  
5' CAAGAGUGUUUGAGAGUAU  
    ||||| |||||  
    GUUCUCACAAACCCUCUCA 5'  
AT2G01420.2    453    471

leaves\_1sup\_AG01\_SoLexa\_Mi\_Cell\_2008\_hit\_target\_site.txt  
auxin transporter splice variant b (PIN4)

SRNA\_AG01\_SoLexa\_Mi2008\_1\_2542\_hit2

5' AUAGAUUAACACCCAGGAU  
| | | | | | | | | | | | | | | | | |  
UAUCUAUACUGUGGUC-UA 5'  
AT2G02955.1 1479 1496

SRNA\_AG01\_SoLexa\_Mi2008\_1\_12105\_hit1

5' CUGGUGAUGAUGAUUGU-GGUA  
| | | | | | | | | | | | | | | | | |  
GACCACUACUACUAAGAGCCAC 5'  
AT2G02955.1 1763 1784

SRNA\_AG01\_SoLexa\_Mi2008\_6\_402\_hit22

5' AAAGAGGUCGAG-UAGAAUGA  
| | | | | | | | | | | | | | | | | |  
UUUCUCCAGCUCAAUC-UACG 5'  
AT2G02955.1 2065 2084

SRNA\_AG01\_SoLexa\_Mi2008\_3\_240\_hit2

5' AAAAGUCCAAA-AAAAAUUGUU  
| | | | | | | | | | | | | | | | | |  
UUUUCAG-UUUCUUUUAACAA 5'  
AT2G03120.1 1355 1375  
unknown protein

SRNA\_AG01\_SoLexa\_Mi2008\_1\_7931\_hit2

5' CCCGAUGAUGAUGAUGAG-AC  
| | | | | | | | | | | | | | | | | |  
GAUCUACUACUACUACUCCUG 5'  
AT2G03240.1 128 148  
unknown protein

SRNA\_AG01\_SoLexa\_Mi2008\_1\_25289\_hit1

5' UAUGACGAUGAUGAUGACGGA  
: | | | | | | | | | | | | | | | | | |  
GUACUACUACUACUACU-CCU 5'  
AT2G03240.1 129 148  
unknown protein

SRNA\_AG01\_SoLexa\_Mi2008\_1\_56092\_hit3

5' UUUGUGAUGAUGAUGAUGAUGA  
| | | | | | | | | | | | | | | | | |  
AUUCACUACUACUACUACUACU 5'  
AT2G03240.1 131 152  
unknown protein

SRNA\_AG01\_SoLexa\_Mi2008\_1\_36323\_hit13

5' UGAG-GAUGAUGAUGAUGAUGA  
| | | | | | | | | | | | | | | | | |  
UAUCACUACUACUACUACUACU 5'  
AT2G03240.1 132 153  
unknown protein

SRNA\_AG01\_SoLexa\_Mi2008\_1\_2280\_hit1

5' AGUGGAUGAUGAUGAUGAUG  
| | | | | | | | | | | | | | | | | |  
UCAC-UACUACUACUACUAC 5'  
AT2G03240.1 133 151  
unknown protein

SRNA\_AG01\_SoLexa\_Mi2008\_1\_13537\_hit1

leaves\_1sup\_AG01\_SoLexa\_Mi\_Cell\_2008\_hit\_target\_site.txt

5' GAAGUCCGUAAUGAUUGAU  
||||||| ||||||| |||||  
CUUCAAGCCAAUUACGAACUA 5'  
AT2G03240.1 1609 1629  
unknown protein

SRNA\_AG01\_SoLexa\_Mi2008\_17\_13290\_hit4  
5' CUUUUGUCGGAA-GAUUCAGGA  
||||||| ||| ||||| |||||  
GAAAACAG-CUUACUAACUCCU 5'  
AT2G03510.1 1124 1144  
unknown protein

SRNA\_AG01\_SoLexa\_Mi2008\_2\_34047\_hit4  
5' UCUUUUGUCGGAA-GAUUCAGGA  
||||||| ||| ||||| |||||  
AGAAAACAG-CUUACUAACUCCU 5'  
AT2G03510.1 1124 1145  
unknown protein

SRNA\_AG01\_SoLexa\_Mi2008\_1\_34046\_hit4  
5' UCUUUUGUCGGAA-GAUUCAGG  
||||||| ||| ||||| |||||  
AGAAAACAG-CUUACUAACUCC 5'  
AT2G03510.1 1125 1145  
unknown protein

SRNA\_AG01\_SoLexa\_Mi2008\_61\_11700\_hit1  
5' CUGCAGCAC-UUGGUGAAGUA  
||||||| | |||||||||  
UACGUCG-GUAACCACUUCAU 5'  
AT2G03590.1 1602 1621  
unknown protein

SRNA\_AG01\_SoLexa\_Mi2008\_1\_6827\_hit1  
5' CAUAAGCCCAAUCAUAAUGUG  
||||||| ||||| |||||  
GUAUUCGGGUUCGUAUAACAC 5'  
AT2G03590.1 667 687  
unknown protein

SRNA\_AG01\_SoLexa\_Mi2008\_1\_8179\_hit1  
5' CCUGAUGAUGAUGCUG-CAU  
||||||| ||||| |||||  
AGACUACUACUACUACUGUA 5'  
AT2G03760.1 209 228  
putative steroid sulfotransferase

SRNA\_AG01\_SoLexa\_Mi2008\_1\_55155\_hit1  
5' UUUGA-GAUGAUGAUGACUAU  
| ||| ||||||||| |||||  
ACACUACUACUACUACUG-UA 5'  
AT2G03760.1 209 228  
putative steroid sulfotransferase

SRNA\_AG01\_SoLexa\_Mi2008\_1\_13759\_hit1  
5' GAC-GAUGAUGAUGAUGACA  
|| |||||||||  
AUGACUACUACUACUGU 5'  
AT2G03760.1 210 229  
putative steroid sulfotransferase

SRNA\_AG01\_SoLexa\_Mi2008\_1\_39699\_hit1

leaves\_1sup\_AG01\_SoLexa\_Mi\_Cell\_2008\_hit\_target\_site.txt

5' UGGAACUGAUGAUGAUGAUGAUGA  
|||||  
UCCUUGACUACUACUACUACU 5'  
AT2G03760.1 211 231  
putative steroid sulfotransferase

SRNA\_AG01\_SoLexa\_Mi2008\_1\_49502\_hit1  
5' UUCGGGUUUUCUCGUGCUUUGA  
|||||  
AAGCCCAAAGAGC-CGAAAGA 5'  
AT2G03770.1 624 644  
putative steroid sulfotransferase

SRNA\_AG01\_SoLexa\_Mi2008\_1\_4698\_hit2  
5' CAAGCAAA-GAAUCUAAAAU  
|||||  
UUUCGUUUUCUUAGAUUUUA 5'  
AT2G03770.1 956 975  
putative steroid sulfotransferase

SRNA\_AG01\_SoLexa\_Mi2008\_1\_45719\_hit1  
5' UGUGUGUGUGUGUUGGUGUGU  
|||||  
ACACACACACAC-ACAACACA 5'  
AT2G03890.2 11 30  
unknown protein

SRNA\_AG01\_SoLexa\_Mi2008\_1\_45719\_hit1  
5' UGUGUGUGUGUGUUG-GUGUGU  
|||||  
ACACACACACACAACACA-ACA 5'  
AT2G03890.1 11 31  
unknown protein

SRNA\_AG01\_SoLexa\_Mi2008\_1\_45719\_hit1  
5' UGUGUGUGUGUGUUGGUGUGU  
|||||  
ACACACACACACA-CAACACA 5'  
AT2G03890.1 14 33  
unknown protein

SRNA\_AG01\_SoLexa\_Mi2008\_1\_32589\_hit1  
5' UCGUGUCACUAAGAUGUGUGU  
|||||  
AGCACAGUGAUUCUACACACA 5'  
AT2G03890.2 1876 1896  
unknown protein

SRNA\_AG01\_SoLexa\_Mi2008\_1\_32589\_hit1  
5' UCGUGUCACUAAGAUGUGUGU  
|||||  
AGCACAGUGAUUCUACACACA 5'  
AT2G03890.1 2239 2259  
unknown protein

SRNA\_AG01\_SoLexa\_Mi2008\_1\_19345\_hit2  
5' UACAGAAGAAGGAA-CAAAUUA  
|||||:|  
AUGUCUUCUUCUUUGGUUUU-UU 5'  
AT2G03890.2 520 541  
unknown protein

SRNA\_AG01\_SoLexa\_Mi2008\_1\_19345\_hit2

leaves\_1sup\_AG01\_SoLexa\_Mi\_Cell\_2008\_hit\_target\_site.txt

5' UACAGAAGAAGGAA-CAAAAUAA  
|||||||:| ||||| ||  
AUGUCUUCUUCUUUGGUUUU-UU 5'  
AT2G03890.1 523 544  
unknown protein

SRNA\_AG01\_SoLexa\_Mi2008\_1\_45719\_hit1  
5' UGUGUGUGUGUGUUG-GUGUGU  
||||||| |||||  
ACACACACACACAACA-ACA 5'  
AT2G03890.2 8 28  
unknown protein

SRNA\_AG01\_SoLexa\_Mi2008\_1\_55155\_hit1  
5' UUUGA-GAUGAUGAUGACUUAU  
:|||| |||||:|  
GAACUACUACUACUGAUG 5'  
AT2G05940.1 1242 1262  
putative protein kinase

SRNA\_AG01\_SoLexa\_Mi2008\_9\_14254\_hit8  
5' GAUGAUGAUGAUGAUGAUCUU  
||||||| ||||| ||  
CUACUACUACUACUACU-GAU 5'  
AT2G05940.1 1243 1262  
putative protein kinase

SRNA\_AG01\_SoLexa\_Mi2008\_7\_3078\_hit1  
5' AUGAUGAUGA-GAAUGAUGAU  
||||||| || |||||:  
UACUACUACUACU-ACUACUG 5'  
AT2G05940.1 1245 1264  
putative protein kinase

SRNA\_AG01\_SoLexa\_Mi2008\_1\_7931\_hit2  
5' CCCGAUGAUGAUGAUGA-GAC  
| ||||| ||||| |||||  
GUUCUACUACUACUACUG 5'  
AT2G05940.1 1245 1265  
putative protein kinase

SRNA\_AG01\_SoLexa\_Mi2008\_1\_56092\_hit3  
5' UUUGU-GAUGAUGAUGAUGAUGA  
:|||| ||||| ||||| |||||  
GAACAACUACUACUACUACU 5'  
AT2G05940.1 1246 1268  
putative protein kinase

SRNA\_AG01\_SoLexa\_Mi2008\_2\_56614\_hit1  
5' UUUUGUGAGGUGCUAGUUU  
||||||| |||||  
AAAACACUCCAC-A-CAA 5'  
AT2G13100.1 54 70

SRNA\_AG01\_SoLexa\_Mi2008\_1\_4748\_hit1  
5' CAAGCGAGACUAGGAUGUGUC  
||||||| |||||  
GUUCGCUCUGAU-CU-CACAG 5'  
AT2G13810.1 1124 1142  
putative aspartate aminotransferase

SRNA\_AG01\_SoLexa\_Mi2008\_2\_11107\_hit1  
5' CUCGGCUGG-UUGAUGGAUCAU

leaves\_1sup\_AG01\_SoLexa\_Mi\_Cell\_2008\_hit\_target\_site.txt

||||||| || |||||:  
GAGCCGACCUAA-UACCUAGUG 5'  
AT2G14835.2 249 269  
unknown protein

SRNA\_AG01\_SoLexa\_Mi2008\_1\_22750\_hit3  
5' UAGGAGGAGGU-GCUGGUGGAG  
:||||||| | |||||  
GUCCUCCUC-AUCGACCACCUC 5'  
AT2G14890.2 303 323  
arabinogalactan-protein AGP9

SRNA\_AG01\_SoLexa\_Mi2008\_1\_22750\_hit3  
5' UAGGAGGAGGUGCUGGUGGAG  
||||||| |||||  
CUCCUCCUCAACGACCACCUC 5'  
AT2G14890.2 356 376  
arabinogalactan-protein AGP9

SRNA\_AG01\_SoLexa\_Mi2008\_1\_51908\_hit6  
5' UUGGAAAAGUGACUGCUGAUUUAGU  
|||:||||||| |||||  
AACUUUUUCACUGACAACUAAUUA 5'  
AT2G15050.1 437 461  
putative lipid transfer protein

SRNA\_AG01\_SoLexa\_Mi2008\_2\_34868\_hit1  
5' UGAAGUC-CGGUUCUCGCAUGGU  
||||||| |||||  
ACUUCAGUGCCAAGAGCGUAGGA 5'  
AT2G15490.2 355 377  
putative glucosyltransferase

SRNA\_AG01\_SoLexa\_Mi2008\_1\_48518\_hit2  
5' UUCAAGGACAAGUCACAUGAGC  
|||||:||||||| |||||  
AAGUUCUUGUUCAGUUUACUCA 5'  
AT2G15490.2 398 419  
putative glucosyltransferase

SRNA\_AG01\_SoLexa\_Mi2008\_3\_11240\_hit1  
5' CUCUCUCAUGUUUACAGA  
|| ||||| ||||| ||  
AAG-GAGUACAAUUAUG-CU 5'  
AT2G15490.2 593 609  
putative glucosyltransferase

SRNA\_AG01\_SoLexa\_Mi2008\_1\_21700\_hit1  
5' UAGAUACGCAACAACACUGAG  
||||||| ||||| |||  
AUCUAUGCCUUGUUGUG-CUC 5'  
AT2G15560.1 797 816  
unknown protein

SRNA\_AG01\_SoLexa\_Mi2008\_1\_45020\_hit16  
5' UGUGAU-CAGCAAAGACCAGCUG  
|||| | ||| |||||  
ACACAAUGUC-UUUCUGGUCGAC 5'  
AT2G16640.1 3270 3291  
putative chloroplast outer membrane protein

SRNA\_AG01\_SoLexa\_Mi2008\_31\_7103\_hit13  
5' CAUGAACGUUUGUUGUGUC

leaves\_1sup\_AG01\_SoLexa\_Mi\_Cell\_2008\_hit\_target\_site.txt

|||||  
UUACUUGCAAAAAACACAA 5'  
AT2G16650.1 1822 1840  
hypothetical protein

SRNA\_AG01\_SoLexa\_Mi2008\_1\_3\_hit25  
5' AAAAAAAAAAAAA-AGAAAGA  
| |||||  
AUGUUUUUUUUUAUCUUUCU 5'  
AT2G16720.1 904 923  
DNA-binding protein

SRNA\_AG01\_SoLexa\_Mi2008\_3\_46668\_hit1  
5' UUAAGUGUCUCAGAUCAAGUUUUG  
||| || |||||  
AAUU-ACUGAGUCUAGUCCAAAAC 5'  
AT2G16900.2 1195 1217  
unknown protein

SRNA\_AG01\_SoLexa\_Mi2008\_3\_46668\_hit1  
5' UUAAGUGUCUCAGAUCAAGUUUUG  
||| || |||||  
AAUU-ACUGAGUCUAGUCCAAAAC 5'  
AT2G16900.1 1612 1634  
unknown protein

SRNA\_AG01\_SoLexa\_Mi2008\_3\_46668\_hit1  
5' UUAAGUGUCUCAGAUCAAGUUUUG  
||| || |||||  
AAUU-ACUGAGUCUAGUCCAAAAC 5'  
AT2G16900.3 1654 1676  
unknown protein

SRNA\_AG01\_SoLexa\_Mi2008\_1\_3\_hit25  
5' AAAA-AA-AAAAAAGAAAGA  
| || || |||||  
UGUUUUUUUUUUUCUUUCU 5'  
AT2G16900.3 191 211  
unknown protein

SRNA\_AG01\_SoLexa\_Mi2008\_2\_51\_hit1  
5' AAAAAAGA-AGAGAAACAAAGA  
||| || |||||  
CCUUUUCUCUCUCUUUGUUUCU 5'  
AT2G16900.3 1 22  
unknown protein

SRNA\_AG01\_SoLexa\_Mi2008\_1\_10880\_hit1  
5' CUCCC-GUAUUCUCGAUAAG  
||| | |||||:  
GAGGGGC-UAAGAGCUAUUU 5'  
AT2G17040.1 159 177  
NAM (no apical meristem)-like protein

SRNA\_AG01\_SoLexa\_Mi2008\_1\_2\_hit38  
5' AAAAA-AAAA-AAAAAACCAU  
||| ||| |||||  
UUUUUGUUUUUGUUUUUGGUA 5'  
AT2G17130.2 1319 1339  
NAD+ dependent isocitrate dehydrogenase subunit 2 like, IDH2

SRNA\_AG01\_SoLexa\_Mi2008\_1\_2\_hit38  
5' AAAAA-AAAA-AAAAAACCAU

leaves\_1sup\_AG01\_SoLexa\_Mi\_Cell\_2008\_hit\_target\_site.txt

||||| |||| |  
UUUUUGUUUUUGUUUUUGGUA 5'  
AT2G17130.1 1331 1351  
NAD+ dependent isocitrate dehydrogenase subunit 2 like, IDH2

SRNA\_AG01\_SoLexa\_Mi2008\_1\_34613\_hit1  
5' UGAAGAUGAAGAUGAGUUGU  
|||||: |  
UCUUCUACUUCUUCUCAACG 5'  
AT2G17130.2 13 32  
NAD+ dependent isocitrate dehydrogenase subunit 2 like, IDH2

SRNA\_AG01\_SoLexa\_Mi2008\_1\_13411\_hit2  
5' GAAGAAAACGCGUGUGGUC  
|||||: |  
CUUCUUUUGCGC-CACCGA 5'  
AT2G17420.1 102 119  
putative thioredoxin reductase

SRNA\_AG01\_SoLexa\_Mi2008\_1\_19461\_hit1  
5' UACAGCUGUGUCAUGGUACCU  
|||||  
AUGUCGACACAGUACCAUGGC 5'  
AT2G17500.4 1216 1236  
unknown protein

SRNA\_AG01\_SoLexa\_Mi2008\_1\_19461\_hit1  
5' UACAGCUGUGUCAUGGUACCU  
|||||  
AUGUCGACACAGUACCAUGGC 5'  
AT2G17500.3 1223 1243  
unknown protein

SRNA\_AG01\_SoLexa\_Mi2008\_1\_19461\_hit1  
5' UACAGCUGUGUCAUGGUACCU  
|||||  
AUGUCGACACAGUACCAUGGC 5'  
AT2G17500.1 1278 1298  
unknown protein

SRNA\_AG01\_SoLexa\_Mi2008\_1\_19461\_hit1  
5' UACAGCUGUGUCAUGGUACCU  
|||||  
AUGUCGACACAGUACCAUGGC 5'  
AT2G17500.2 1295 1315  
unknown protein

SRNA\_AG01\_SoLexa\_Mi2008\_9\_14254\_hit8  
5' GAUGAUGAUGAUGAUGAUCUU  
|| |  
CU-CUACUACUACUACUAGUC 5'  
AT2G17520.1 154 173  
endoribonuclease/protein kinase IRE1 (IRE1)

SRNA\_AG01\_SoLexa\_Mi2008\_1\_13759\_hit1  
5' GACGAUGAUGAUGAUGA-CA  
|| |  
CU-CUACUACUACUACUAGU 5'  
AT2G17520.1 155 173  
endoribonuclease/protein kinase IRE1 (IRE1)

SRNA\_AG01\_SoLexa\_Mi2008\_1\_3079\_hit472  
5' AU-GAUGAUGAUGAUGAUGAUGA

leaves\_1sup\_AG01\_Solexa\_Mi\_Cell\_2008\_hit\_target\_site.txt

|| || |||||  
UAUCU-CUACUACUACUAGU 5'  
AT2G17520.1 155 176  
endoribonuclease/protein kinase IRE1 (IRE1)

SRNA\_AG01\_Solexa\_Mi2008\_5\_13760\_hit2  
5' GACGAUGAUGAUGAGC  
|| |||||  
CU-CUACUACUACUAG 5'  
AT2G17520.1 156 173  
endoribonuclease/protein kinase IRE1 (IRE1)

SRNA\_AG01\_Solexa\_Mi2008\_1\_3079\_hit472  
5' AUGAU-GAUGAUGAUGAUGA  
|||| || |||||  
GACUAUCU-CUACUACUACU 5'  
AT2G17520.1 158 179  
endoribonuclease/protein kinase IRE1 (IRE1)

SRNA\_AG01\_Solexa\_Mi2008\_1\_36898\_hit1  
5' UGAGUU-G-GAUGAUGAUGAUGA  
|||| | | |||||  
ACUCUAUCUCUACUACUACU 5'  
AT2G17520.1 158 180  
endoribonuclease/protein kinase IRE1 (IRE1)

SRNA\_AG01\_Solexa\_Mi2008\_1\_50157\_hit1  
5' UUGAAUCA-GAGAGGUGACGGGU  
|| || || |||||  
AA-UUCGUACUCUCCACUGCCCA 5'  
AT2G17520.1 1834 1855  
endoribonuclease/protein kinase IRE1 (IRE1)

SRNA\_AG01\_Solexa\_Mi2008\_1\_29379\_hit1  
5' UCCACGGGCCGGUUCUGUUGC  
||||| | |||||  
CGGUGCC-G-CCAAGACAACG 5'  
AT2G17670.2 164 182  
unknown protein

SRNA\_AG01\_Solexa\_Mi2008\_1\_7550\_hit15  
5' CAUUUUUUGUUU-CUGU-GAUUG  
||||| || | |||||  
GUAAAAAACAAAAGAAAGCUAAC 5'  
AT2G17670.2 50 72  
unknown protein

SRNA\_AG01\_Solexa\_Mi2008\_1\_7006\_hit1  
5' CAUCAUCAUCAC-AGAAG  
||||| || |  
GUAGUAGUAGUAGUGAUCGUA 5'  
AT2G18193.1 644 664  
AAA-type ATPase like protein

SRNA\_AG01\_Solexa\_Mi2008\_8\_4218\_hit28  
5' CAAAG-UGGCUGCAAAAUGUA  
|||| | |||||  
GUUUCUACCGACGUUUUUACUC 5'  
AT2G18900.1 2544 2565  
unknown protein

SRNA\_AG01\_Solexa\_Mi2008\_8\_5939\_hit1  
5' CAGAAGCAGCAGAGAA-AAGAA

leaves\_1sup\_AG01\_SoLexa\_Mi\_Cell\_2008\_hit\_target\_site.txt

||||| ||||||||| |||||  
AUCUUCUUCGUCUCCUUCUUCU 5'  
AT2G20120.1 269 291  
unknown protein

SRNA\_AG01\_SoLexa\_Mi2008\_8\_5939\_hit1  
5' CAGAAGCAGCAGAGGAA-AAGAA  
||||| ||||||||| |||||  
AUCUUCUUCGUCUCCUUCUUCU 5'  
AT2G20130.1 273 295  
unknown protein

SRNA\_AG01\_SoLexa\_Mi2008\_6\_14255\_hit369  
5' GAUGAUGAU-GAUGAUGAUGAUGAU  
||||||||| | |||||||||||||  
CUACUACU AAC-ACUACUACUACU 5'  
AT2G20130.1 34 57  
unknown protein

SRNA\_AG01\_SoLexa\_Mi2008\_1\_36323\_hit13  
5' UGAGGAU-GAUGAUGAUGAUGA  
||| ||| | |||||||||||||  
ACUACU AAC-ACUACUACUACU 5'  
AT2G20130.1 35 55  
unknown protein

SRNA\_AG01\_SoLexa\_Mi2008\_1\_3079\_hit472  
5' AUGAUGAU-GAUGAUGAUGAUGA  
||||||||| | |||||||||||||  
UACUACU AAC-ACUACUACUACU 5'  
AT2G20130.1 35 56  
unknown protein

SRNA\_AG01\_SoLexa\_Mi2008\_1\_34559\_hit1  
5' UGAAGA-GAUUGUGAUGAUGUU  
||| || ||||||||||||| |  
ACUACUACU AACACUACUACU 5'  
AT2G20130.1 37 58  
unknown protein

SRNA\_AG01\_SoLexa\_Mi2008\_6\_14255\_hit369  
5' GAUGAUGAUGA-UGAUGAUGAUGAU  
||||||||||| || |||||||||||||  
CUACUACUACU AAC-ACUACUACU 5'  
AT2G20130.1 37 60  
unknown protein

SRNA\_AG01\_SoLexa\_Mi2008\_1\_14256\_hit8  
5' GAUGAUGAUGAU-GAUGAUGAUGUU  
||||||||||| | ||||||||| |  
CUACUACUACU AAC-ACUACUACU 5'  
AT2G20130.1 37 60  
unknown protein

SRNA\_AG01\_SoLexa\_Mi2008\_1\_36323\_hit13  
5' UGAGGAUGAU-GAUGAUGAUGA  
||| ||||| | |||||||||  
ACUACUACU AAC-ACUACUACU 5'  
AT2G20130.1 38 58  
unknown protein

SRNA\_AG01\_SoLexa\_Mi2008\_1\_3079\_hit472  
5' AUGAUGAUGAU-GAUGAUGAUGA

leaves\_1sup\_AG01\_SoLexa\_Mi\_Cell\_2008\_hit\_target\_site.txt

```
|||||
UACUACUACUAAC-ACUACUACU 5'
AT2G20130.1    38    59
unknown protein
```

```
SRNA_AG01_SoLexa_Mi2008_6_14255_hit369
5' GAUGAUGAUGAUGA-UGAUGAUGAU
:|||||
UUACUACUACUACUAAC-ACUACUA 5'
AT2G20130.1    40    63
unknown protein
```

```
SRNA_AG01_SoLexa_Mi2008_1_36323_hit13
5' UGAGGAUGAUGAU-GAUGAUGA
||| |||||
ACUACUACUACUAAC-ACUACU 5'
AT2G20130.1    41    61
unknown protein
```

```
SRNA_AG01_SoLexa_Mi2008_1_3079_hit472
5' AUGAUGAUGAUGAU-GAUGAUGA
|||||
UACUACUACUACUAAC-ACUACU 5'
AT2G20130.1    41    62
unknown protein
```

```
SRNA_AG01_SoLexa_Mi2008_1_51445_hit1
5' UUGCAUGAUGAUGAUUGAUGU
||| |||||
AAC-UACUACUACUAAC-ACU 5'
AT2G20130.1    44    62
unknown protein
```

```
SRNA_AG01_SoLexa_Mi2008_1_28233_hit3
5' UCAGCAAAACCAAGGUCAUGCU
|||||
AGUCGUUUUGGUUCA-UA-GA 5'
AT2G20720.1   1082   1101
unknown protein
```

```
SRNA_AG01_SoLexa_Mi2008_1_13467_hit1
5' GAAGAUUAAUCCAU-AUU-AU
:|||||
UUUCUAAUUAGGUUUUAAGUA 5'
AT2G20720.1    401   421
unknown protein
```

```
SRNA_AG01_SoLexa_Mi2008_1_56662_hit4
5' UUUUUGAAGGCAAGA-GA-GAGA
|||||
AAAAAGUCCGUUCUACUCU 5'
AT2G21050.1    48    70
AUX1-like amino acid permease
```

```
SRNA_AG01_SoLexa_Mi2008_1_48515_hit1
5' UUCAAGGAACGGAUU-UUGUUA
|||||
AAGUCCUUGGCUAAGAACAAG 5'
AT2G21520.1    144   165
putative phosphatidylinositol/phosphatidylcholine transfer protein
```

```
SRNA_AG01_SoLexa_Mi2008_1_48515_hit1
5' UUCAAGGAACGGAUU-UUGUUA
```

leaves\_1sup\_AG01\_SoLexa\_Mi\_Cell\_2008\_hit\_target\_site.txt

|||||  
AAGUCCUUGGCUAAGAACAAG 5'  
AT2G21520.2 162 183  
putative phosphatidylinositol/phosphatidylcholine transfer protein

SRNA\_AG01\_SoLexa\_Mi2008\_2\_13369\_hit1  
5' GAA-AUUGUAAAGAGGUUCUGA  
||| ||| ||||||||||||  
CUUGUAAGAUUUCUCCAAGACC 5'  
AT2G21580.2 518 539  
40S ribosomal protein S25

SRNA\_AG01\_SoLexa\_Mi2008\_2\_13369\_hit1  
5' GAA-AUUGUAAAGAGGUUCUGA  
||| ||| ||||||||||||  
CUUGUAAGAUUUCUCCAAGACC 5'  
AT2G21580.1 551 572  
40S ribosomal protein S25

SRNA\_AG01\_SoLexa\_Mi2008\_1\_52954\_hit1  
5' UUGGUCCAUGGUGUUUU-GACA  
||| |||||||||||| |||  
AAC-AGGUACCACAAAACUUU 5'  
AT2G21640.1 238 258  
unknown protein

SRNA\_AG01\_SoLexa\_Mi2008\_12\_23988\_hit1  
5' UAGUGGUG-CGUUGUUGAGAUC  
||||||| | ||||||||  
UUCACCACAG-AACAACUCUAG 5'  
AT2G21870.2 50 70  
putative ATP synthase

SRNA\_AG01\_SoLexa\_Mi2008\_1\_7667\_hit9  
5' CCACAAAUCCUUAAGCUCUCC  
||| ||| ||| ||||||||  
GGU-UUU-GGAAUUCGAGAAGG 5'  
AT2G22100.1 618 637  
putative RNA-binding protein

SRNA\_AG01\_SoLexa\_Mi2008\_2\_11061\_hit1  
5' CUCGCCAUUGUUGAUCGGU  
||||| ||||| |||:  
UAGCGGUAACAACU-GCCG 5'  
AT2G22100.1 8 25  
putative RNA-binding protein

SRNA\_AG01\_SoLexa\_Mi2008\_1\_23262\_hit1  
5' UAGGGUCUUGAAACGUUGUGAG  
||||| ||||| ||||||||  
AUCCC-GAACUUCGCAACACUC 5'  
AT2G22330.1 129 149  
putative cytochrome P450

SRNA\_AG01\_SoLexa\_Mi2008\_1\_21384\_hit1  
5' UAGAGGAGGCGCGUUGACGGU  
||||| ||||| ||||||||  
AUCUCCUCCGCGCAACUGCCA 5'  
AT2G22500.1 438 458  
putative mitochondrial dicarboxylate carrier protein

SRNA\_AG01\_SoLexa\_Mi2008\_2\_4570\_hit2  
5' CAAGAAGAGAUUCCAU-AGU

leaves\_1sup\_AG01\_SoLexa\_Mi\_Cell\_2008\_hit\_target\_site.txt

|||||  
GUUCUUCUCUUAGGUAGUCA 5'  
AT2G22840.1 233 252  
unknown protein

SRNA\_AG01\_SoLexa\_Mi2008\_3\_5131\_hit1  
5' CAAUGAAAAAGGGCCUAAU-CUC  
|||||  
GUUACUUUUUCCAGGAAAAUGAG 5'  
AT2G22840.1 471 493  
unknown protein

SRNA\_AG01\_SoLexa\_Mi2008\_9\_5355\_hit1  
5' CACAG-CUUUCUUGAACUUU  
|||||  
GUGUCCGAAAGAACUUGCUA 5'  
AT2G22840.1 780 799  
unknown protein

SRNA\_AG01\_SoLexa\_Mi2008\_138\_7679\_hit1  
5' CCACAG-CUUUCUUGAACUG  
||||| :  
GGUGUCCGAAAGAACUUGCU 5'  
AT2G22840.1 781 800  
unknown protein

SRNA\_AG01\_SoLexa\_Mi2008\_54\_7680\_hit1  
5' CCACAG-CUUUCUUGAACUU  
||||| :  
GGUGUCCGAAAGAACUUGCU 5'  
AT2G22840.1 781 800  
unknown protein

SRNA\_AG01\_SoLexa\_Mi2008\_18\_29330\_hit1  
5' UCCACAG-CUUUCUUGAACUG  
||||| :  
AGGUGUCCGAAAGAACUUGCU 5'  
AT2G22840.1 781 801  
unknown protein

SRNA\_AG01\_SoLexa\_Mi2008\_11\_29331\_hit1  
5' UCCACAG-CUUUCUUGAACUU  
||||| :  
AGGUGUCCGAAAGAACUUGCU 5'  
AT2G22840.1 781 801  
unknown protein

SRNA\_AG01\_SoLexa\_Mi2008\_1449\_48967\_hit1  
5' UCCACAG-CUUUCUUGAACUG  
||||| :  
AAGGUGUCCGAAAGAACUUGCU 5'  
AT2G22840.1 781 802  
unknown protein

SRNA\_AG01\_SoLexa\_Mi2008\_809\_48968\_hit1  
5' UCCACAG-CUUUCUUGAACUU  
||||| :  
AAGGUGUCCGAAAGAACUUGCU 5'  
AT2G22840.1 781 802  
unknown protein

SRNA\_AG01\_SoLexa\_Mi2008\_9\_12589\_hit1  
5' CUCCACAG-CUUUCUUGAACUG

leaves\_1sup\_AG01\_SoLexa\_Mi\_Cell\_2008\_hit\_target\_site.txt

||||| :  
GAAGGUGUCCGAAAGAACUUGC 5'  
AT2G22840.1 781 803  
unknown protein

SRNA\_AG01\_SoLexa\_Mi2008\_8\_48966\_hit2  
5' UUCCACAG-CUUUCUUGAACU  
||||| :  
AAGGUGUCCGAAAGAACUUGC 5'  
AT2G22840.1 782 802  
unknown protein

SRNA\_AG01\_SoLexa\_Mi2008\_5\_12588\_hit1  
5' CUUCCACAG-CUUUCUUGAACU  
||||| :  
GAAGGUGUCCGAAAGAACUUGC 5'  
AT2G22840.1 782 803  
unknown protein

SRNA\_AG01\_SoLexa\_Mi2008\_1\_42987\_hit1  
5' UGGUAUGAUGAUGUGUUACUCA  
||||| :  
ACCAUACUACAACACAA-G-GU 5'  
AT2G22840.1 949 968  
unknown protein

SRNA\_AG01\_SoLexa\_Mi2008\_1\_11584\_hit1  
5' CUGAUGACAUAUUUUUACAU  
:||||| :  
AGCUACUGUAUUU-AAUGUA 5'  
AT2G22860.1 364 382  
unknown protein

SRNA\_AG01\_SoLexa\_Mi2008\_8\_7746\_hit1  
5' CCAGAAGCCUCUAGGAUGUU  
||||| :  
GGUCUUCGGAGAUCCUACAA 5'  
AT2G23520.1 2738 2757  
hypothetical protein

SRNA\_AG01\_SoLexa\_Mi2008\_1\_21596\_hit4  
5' UAGAGUGA-ACAUGAUGAG  
||||| :  
CUCUCA-UCUGUUACUACUC 5'  
AT2G23810.1 942 960  
similar to senescence-associated protein

SRNA\_AG01\_SoLexa\_Mi2008\_2\_44783\_hit3  
5' UGUCGUUGGCUAAGUCCGUUC  
||| ||||| :  
CCAGAAACCGAUUCAGG-AAG 5'  
AT2G24200.2 202 221  
putative leucine aminopeptidase

SRNA\_AG01\_SoLexa\_Mi2008\_2\_44783\_hit3  
5' UGUCGUUGGCUAAGUCCGUUC  
||| ||||| :  
CCAGAAACCGAUUCAGG-AAG 5'  
AT2G24200.1 228 247  
putative leucine aminopeptidase

SRNA\_AG01\_SoLexa\_Mi2008\_6\_14255\_hit369  
5' GAUGAUGAUGAUGAUGAUGAU

```

|||||:|:|:|
CUACUACUACUACUACUACUACUACU 5'
AT2G25110.1 157 180
unknown protein
  
```

```

SRNA_AG01_SoLexa_Mi2008_1_14256_hit8
5' GAUGAUGAUGAUGAUGAUGAUGUU
  |||||:|:|:|
  CUACUACUACUACUACUACUACUACU 5'
AT2G25110.1 157 180
unknown protein
  
```

```

SRNA_AG01_SoLexa_Mi2008_1_3079_hit472
5' AUGAUGAUGAUGAUGAUGAUGAUGA
  |||||:|:|:|
  UACUACUACUACUACUACUACUACU 5'
AT2G25110.1 158 179
unknown protein
  
```

```

SRNA_AG01_SoLexa_Mi2008_9_14254_hit8
5' GAUGAUGAUGAUGAUGAUGAUCUU
  |||||:|:|:|
  CUACUACUACUACUACUACUACU 5'
AT2G25110.1 160 180
unknown protein
  
```

```

SRNA_AG01_SoLexa_Mi2008_1_34544_hit1
5' UGAAGACGAAGAUGAUGAUGAUGA
  ||||| || |||||
  ACUUCUACUACUACUACUACUACU 5'
AT2G25110.1 162 184
unknown protein
  
```

```

SRNA_AG01_SoLexa_Mi2008_1_2280_hit1
5' AG-UGGAUGAUGAUGAUGAUGAUG
  || || |||||:|:|:|
  UCUAC-UACUACUACUACUACU 5'
AT2G25110.1 163 182
unknown protein
  
```

```

SRNA_AG01_SoLexa_Mi2008_6_14255_hit369
5' GAUGAUGAUGAUGAUGAUGAUGAUG
  ||||| |||||
  CUACUUCUACUACUACUACUACU 5'
AT2G25110.1 163 186
unknown protein
  
```

```

SRNA_AG01_SoLexa_Mi2008_1_14256_hit8
5' GAUGAUGAUGAUGAUGAUGAUGUU
  ||||| |||||:|:|:|
  CUACUUCUACUACUACUACUACU 5'
AT2G25110.1 163 186
unknown protein
  
```

```

SRNA_AG01_SoLexa_Mi2008_7_3078_hit1
5' AUGAUGAUGAUGAUGAUGAUGAUG
  ||||| || |||||
  AACUACUACUACU-ACUACU 5'
AT2G25110.1 164 183
unknown protein
  
```

```

SRNA_AG01_SoLexa_Mi2008_1_36323_hit13
5' UGAGGAUGAUGAUGAUGAUGAUGA
  
```

leaves\_1sup\_AG01\_SoLexa\_Mi\_Cell\_2008\_hit\_target\_site.txt

|||:|||||||  
ACUUCUACUACUACUACUACU 5'  
AT2G25110.1 164 184  
unknown protein

SRNA\_AG01\_SoLexa\_Mi2008\_1\_3079\_hit472  
5' AUGAUGAUGAUGAUGAUGAUGA  
|||||  
UACUUCUACUACUACUACU 5'  
AT2G25110.1 164 185  
unknown protein

SRNA\_AG01\_SoLexa\_Mi2008\_1\_36898\_hit1  
5' UGA-GUUGGAUGAUGAUGAUGA  
||| | |||  
ACUUCUAC-UACUACUACUACU 5'  
AT2G25110.1 165 185  
unknown protein

SRNA\_AG01\_SoLexa\_Mi2008\_1\_45039\_hit3  
5' UG-UGAUGAUGAUGAUGAUGAUGA  
|| |||  
ACUACUUCUACUACUACUACU 5'  
AT2G25110.1 165 188  
unknown protein

SRNA\_AG01\_SoLexa\_Mi2008\_6\_14255\_hit369  
5' GAUGAUGAUGAUGAUGAUGAUGAU  
|||||||  
CUACUACUUCUACUACUACUACUA 5'  
AT2G25110.1 166 189  
unknown protein

SRNA\_AG01\_SoLexa\_Mi2008\_1\_14256\_hit8  
5' GAUGAUGAUGAUGAUGAUGAUGUU  
|||||||  
CUACUACUUCUACUACUACUACUA 5'  
AT2G25110.1 166 189  
unknown protein

SRNA\_AG01\_SoLexa\_Mi2008\_1\_3079\_hit472  
5' AUGAUGAUGAUGAUGAUGAUGA  
|||||||  
UACUACUUCUACUACUACUACU 5'  
AT2G25110.1 167 188  
unknown protein

SRNA\_AG01\_SoLexa\_Mi2008\_1\_38238\_hit1  
5' UGCAUGAACAUUGAUGAUGAUGG  
|| |||||  
AC-UACUUCUACUACUACUACU 5'  
AT2G25110.1 168 188  
unknown protein

SRNA\_AG01\_SoLexa\_Mi2008\_3\_14271\_hit18  
5' GAUGCUGAAUAUGAUGAUGA-GA  
|||| |  
CUACUACUUCUACUACUACUACU 5'  
AT2G25110.1 168 190  
unknown protein

SRNA\_AG01\_SoLexa\_Mi2008\_1\_56092\_hit3  
5' UUUG-UGAUGAUGAUGAUGAUGA

leaves\_1sup\_AG01\_SoLexa\_Mi\_Cell\_2008\_hit\_target\_site.txt

:||| ||| |||||  
GAACUACUUCUACUACUACU 5'  
AT2G25110.1 168 190  
unknown protein

SRNA\_AG01\_SoLexa\_Mi2008\_1\_3079\_hit472  
5' AUGAUGAUGAUGAUGAUGAUGA  
|||  
CUCUACUACUUCUACUACU 5'  
AT2G25110.1 170 191  
unknown protein

SRNA\_AG01\_SoLexa\_Mi2008\_1\_41920\_hit17  
5' UGG-GAUGAUGAAGUUGAUGAU  
|||  
ACCUCUACUACUUCUACUACUA 5'  
AT2G25110.1 173 194  
unknown protein

SRNA\_AG01\_SoLexa\_Mi2008\_3\_49087\_hit1  
5' UUCCGAGGUGGUGUGGUCU  
|||  
AAGGCUCCACCACAG-AGA 5'  
AT2G25450.1 1089 1106  
putative dioxygenase

SRNA\_AG01\_SoLexa\_Mi2008\_9\_52832\_hit1  
5' UUGGGUUGGU-UCGGGUUAGAA  
|||  
AACCAAAACAGAGCCCAUAUCUU 5'  
AT2G25450.1 450 472  
putative dioxygenase

SRNA\_AG01\_SoLexa\_Mi2008\_1\_2638\_hit1  
5' AUAGGUUGUGCAGUUUGAGCU  
|||  
UAUCCUAGACGUCAAACUCGA 5'  
AT2G25490.1 1962 1982  
putative glucose regulated repressor protein

SRNA\_AG01\_SoLexa\_Mi2008\_2\_8128\_hit2  
5' CCUAGAACGGUUCGGGGUGUU  
|||  
GGAUCUUGCAAAGCCCC-A-AA 5'  
AT2G25680.1 46 65  
hypothetical protein

SRNA\_AG01\_SoLexa\_Mi2008\_1\_8490\_hit1  
5' CGAGAAGAAUGAUGUCCUCU  
|||  
GCUCUUCUACUAC-GGAAC 5'  
AT2G26430.2 1301 1319  
cyclin like protein

SRNA\_AG01\_SoLexa\_Mi2008\_1\_8490\_hit1  
5' CGAGAAGAAUGAUGUCCUCU  
|||  
GCUCUUCUACUAC-GGAAC 5'  
AT2G26430.1 1308 1326  
cyclin like protein

SRNA\_AG01\_SoLexa\_Mi2008\_1\_8490\_hit1  
5' CGAGAAGAAUGAUGUCCUCU

leaves\_1sup\_AG01\_SoLexa\_Mi\_Cell\_2008\_hit\_target\_site.txt

|||||  
GCUCUUCUUACUAC-GGAAC 5'  
AT2G26430.3 1392 1410  
cyclin like protein

SRNA\_AG01\_SoLexa\_Mi2008\_2\_26713\_hit3  
5' UC-AAAGCCAAAUCAUAUCAC  
|| ||||| |||||  
AGCUUUCGCUUUAGUUUAUAGUA 5'  
AT2G26530.2 431 452  
AR781, similar to yeast pheromone receptor

SRNA\_AG01\_SoLexa\_Mi2008\_1\_10600\_hit3  
5' CUC-AAAGCCAAAUCAUAUCAC  
||| ||||| |||||  
GAGCUUUCGCUUUAGUUUAUAGUA 5'  
AT2G26530.2 431 453  
AR781, similar to yeast pheromone receptor

SRNA\_AG01\_SoLexa\_Mi2008\_3\_26712\_hit3  
5' UC-AAAGCCAAAUCAUAUCA  
|| ||||| |||||  
AGCUUUCGCUUUAGUUUAUAGU 5'  
AT2G26530.2 432 452  
AR781, similar to yeast pheromone receptor

SRNA\_AG01\_SoLexa\_Mi2008\_2\_26713\_hit3  
5' UC-AAAGCCAAAUCAUAUCAC  
|| ||||| |||||  
AGCUUUCGCUUUAGUUUAUAGUA 5'  
AT2G26530.1 449 470  
AR781, similar to yeast pheromone receptor

SRNA\_AG01\_SoLexa\_Mi2008\_1\_10600\_hit3  
5' CUC-AAAGCCAAAUCAUAUCAC  
||| ||||| |||||  
GAGCUUUCGCUUUAGUUUAUAGUA 5'  
AT2G26530.1 449 471  
AR781, similar to yeast pheromone receptor

SRNA\_AG01\_SoLexa\_Mi2008\_3\_26712\_hit3  
5' UC-AAAGCCAAAUCAUAUCA  
|| ||||| |||||  
AGCUUUCGCUUUAGUUUAUAGU 5'  
AT2G26530.1 450 470  
AR781, similar to yeast pheromone receptor

SRNA\_AG01\_SoLexa\_Mi2008\_1\_14490\_hit1  
5' GCAUCAUGAUAGUGUUGUAG  
||||| |||||  
CGUAGUUACUAUC-C-ACAUC 5'  
AT2G26560.1 961 979  
similar to latex allergen from Hevea brasiliensis

SRNA\_AG01\_SoLexa\_Mi2008\_1\_806\_hit1  
5' AAGAGCAUCAUGAUAG-UGUU  
|| ||||| |||||  
UU-UCGUAGUUACUAUCCACAU 5'  
AT2G26560.1 962 982  
similar to latex allergen from Hevea brasiliensis

SRNA\_AG01\_SoLexa\_Mi2008\_1\_34059\_hit1  
5' UGAA-AAAGAGUGUCAUGAUGA

leaves\_1sup\_AG01\_SoLexa\_Mi\_Cell\_2008\_hit\_target\_site.txt

```

||| |||||:|||||||
CCUUGUUUCUUACAGUACUACU 5'
AT2G26650.1      474      495
K+ transporter, AKT1

```

```

SRNA_AG01_SoLexa_Mi2008_1_10002_hit2
5' CUACUUAUAUGAAUUAAGCUUA
  || |||||:|||||
  GA-GAUUAUCUUAGUUCGAAA 5'
AT2G27230.1      2422      2441
unknown protein

```

```

SRNA_AG01_SoLexa_Mi2008_1_10002_hit2
5' CUACUUAUAUGAAUUAAGCUUA
  || |||||:|||||
  GA-GAUUAUCUUAGUUCGAAA 5'
AT2G27230.2      2459      2478
unknown protein

```

```

SRNA_AG01_SoLexa_Mi2008_2_830_hit1
5' AAGAUGGAGAAGAUACGCAA
  ||||| |||
  UUCUACCUCUUCU-UUCGUU 5'
AT2G27230.2      61      79
unknown protein

```

```

SRNA_AG01_SoLexa_Mi2008_2_830_hit1
5' AAGAUGGAGAAGAUACGCAA
  ||||| |||
  UUCUACCUCUUCUUU-CGUU 5'
AT2G27230.1      62      80
unknown protein

```

```

SRNA_AG01_SoLexa_Mi2008_2_16073_hit2
5' GUUA-AAGAAGAUGGAGAAA
  ||| |||||
  AAAUCUUCUUCUACCUCUUC 5'
AT2G27230.2      68      87
unknown protein

```

```

SRNA_AG01_SoLexa_Mi2008_2_16073_hit2
5' GUUA-AAGAAGAUGGAGAAA
  ||| |||||
  AAAUCUUCUUCUACCUCUUC 5'
AT2G27230.1      69      88
unknown protein

```

```

SRNA_AG01_SoLexa_Mi2008_18_5055_hit1
5' CAAGUUGAGCUUCAUGU-U-GAAA
  ||||| |||
  GUUCAACUCGAAGUACAUAACUUC 5'
AT2G27430.1      86      109
unknown protein

```

```

SRNA_AG01_SoLexa_Mi2008_1_22500_hit1
5' UAGCUGAA-GAGGAAGAUGAG
  ||| ||| ||||| |||
  AUC-ACUUUCUCCUUCUACAC 5'
AT2G27840.1      69      88
putative histone deacetylase HD2d

```

```

SRNA_AG01_SoLexa_Mi2008_1_19345_hit2
5' UACAGAAGAAGGAACAAAUA

```

leaves\_1sup\_AG01\_SoLexa\_Mi\_Cell\_2008\_hit\_target\_site.txt

```
|| | ||||| ||||| |||||
AU-U-UUCUUACUUGUUUUUU 5'
AT2G28355.1      16      35
unknown protein
```

```
SRNA_AG01_SoLexa_Mi2008_1_11584_hit1
5' CUGAUGACAUAAA-UUUACAU
   ||||| ||||| ||||| ||
   GACUACUGUAUUUGAAAU-UA 5'
AT2G28510.1      1045     1064
DOF zinc finger like protein
```

```
SRNA_AG01_SoLexa_Mi2008_3_35894_hit1
5' UGAGAGCAGAGAAAGAGAGU
   ||||| ||||| ||||| ||
   ACUCUC-UCUCUUUCUCUCU 5'
AT2G28510.1      24      42
DOF zinc finger like protein
```

```
SRNA_AG01_SoLexa_Mi2008_8_13576_hit1
5' GACAAACUAAUGUUUAUAGU
   ||||| ||||| ||||| ||
   CUGUUUGAUAACAAUUAU-UCA 5'
AT2G28510.1      709     728
DOF zinc finger like protein
```

```
SRNA_AG01_SoLexa_Mi2008_1_28927_hit1
5' UCAUCUGGGGACAA-ACAAGCA
   ||||| ||||| ||||| ||
   AGUAGACCUCUGUUCU-UUCGU 5'
AT2G29120.1      1541     1561
glutamate receptor like protein
```

```
SRNA_AG01_SoLexa_Mi2008_1_7990_hit1
5' CCGAUGGAGAUGGUCUUACAAG
   ||||| ||||| ||||| ||
   GGCUACCUCUACC-GCA-GUUC 5'
AT2G29720.1      332     351
Hydroxylase/Oxygenase (CTF2B)
```

```
SRNA_AG01_SoLexa_Mi2008_1_29892_hit1
5' UCCGAUGGAGAUGGUCUUACAA
   ||||| ||||| ||||| ||
   AGGCUACCUCUACC-GCA-GUU 5'
AT2G29720.1      333     352
Hydroxylase/Oxygenase (CTF2B)
```

```
SRNA_AG01_SoLexa_Mi2008_3_29723_hit1
5' UCCCCUACAAUGUCGAG-UAA
   | ||||| ||||| ||||| ||
   AUGGGAAGGUACAGCUCAAUU 5'
AT2G30140.2      1103     1124
putative glucosyltransferase
```

```
SRNA_AG01_SoLexa_Mi2008_3_29723_hit1
5' UCCCCUACAAUGUCGAGU-AA
   | ||||| ||||| ||||| ||
   AUGGGAAGGUACAGCUCAAUU 5'
AT2G30140.1      1106     1127
putative glucosyltransferase
```

```
SRNA_AG01_SoLexa_Mi2008_6_11244_hit6
5' CUCUGAACCACAACGCUUU
```

leaves\_1sup\_AG01\_SoLexa\_Mi\_Cell\_2008\_hit\_target\_site.txt

|||||  
CAGACUUGGUGUUGAGAAC 5'  
AT2G30250.1 1049 1067  
putative WRKY-type DNA binding protein

SRNA\_AG01\_SoLexa\_Mi2008\_24\_502\_hit1  
5' AAAGGAGGUGGUGGUUGAU  
|||  
GUUC-UCCACCACCAACUC 5'  
AT2G30250.1 255 272  
putative WRKY-type DNA binding protein

SRNA\_AG01\_SoLexa\_Mi2008\_1\_8683\_hit2  
5' CGA-GUU-UCUAUUGGAAGUGGU  
|||  
GCUACAAGAGAUAAACCUUCACCU 5'  
AT2G30440.1 1270 1292  
signal peptidase I like protein

SRNA\_AG01\_SoLexa\_Mi2008\_2\_28674\_hit1  
5' UCAGUGAAAGGAAACUUCUUG  
| ||  
AAUC-CUUUCCUUUGAAGAAC 5'  
AT2G30440.1 27 46  
signal peptidase I like protein

SRNA\_AG01\_SoLexa\_Mi2008\_1\_7006\_hit1  
5' CAUCAUCAUCAUCACAGAAG  
|||||  
GUAGUAGUAGUAGUGU-UUG 5'  
AT2G30440.1 752 770  
signal peptidase I like protein

SRNA\_AG01\_SoLexa\_Mi2008\_1\_55686\_hit1  
5' UUUGGCGGGAAAA-UG-UUUUUGA  
|||||  
AAACCGCCCUUUUAACUAAAGACU 5'  
AT2G30550.1 113 136  
lipase like protein

SRNA\_AG01\_SoLexa\_Mi2008\_1\_55685\_hit1  
5' UUUGGCGGGAAAAACUUCAGUUUCU  
|||||  
AAACCGCCCUUUU-AACU-AAAGA 5'  
AT2G30550.1 115 136  
lipase like protein

SRNA\_AG01\_SoLexa\_Mi2008\_1\_56517\_hit30  
5' UUUUGGCGGGAAAAUAUGAUUUU  
|||||  
AAAACCGCCCUUUUA-ACUAAAG 5'  
AT2G30550.1 116 137  
lipase like protein

SRNA\_AG01\_SoLexa\_Mi2008\_1\_55683\_hit64  
5' UUUGGCGGGAAAAACAUGAUUUU  
|||||  
AAACCGCCCUUUUA-ACUAAA 5'  
AT2G30550.1 117 136  
lipase like protein

SRNA\_AG01\_SoLexa\_Mi2008\_1\_55686\_hit1  
5' UUUGGCGGGAAAA-UG-UUUUUGA

leaves\_1sup\_AG01\_SoLexa\_Mi\_Cell\_2008\_hit\_target\_site.txt

```
|||||:|||||
AAACCGCCUUUUAAACUAAAGACU 5'
AT2G30550.2      124      147
lipase like protein
```

```
SRNA_AG01_SoLexa_Mi2008_1_55685_hit1
5' UUUGGCGGGAAAACUUCAGUUUCU
   |||||:|||||
   AAACCGCCUUUU-AACU-AAAGA 5'
AT2G30550.2      126      147
lipase like protein
```

```
SRNA_AG01_SoLexa_Mi2008_1_56517_hit30
5' UUUUGGCGGGAAAAUAUGAUUUU
   |||||:|||||
   AAAACCGCCUUUU-ACUAAAG 5'
AT2G30550.2      127      148
lipase like protein
```

```
SRNA_AG01_SoLexa_Mi2008_1_55683_hit64
5' UUUGGCGGGAAAACAUGAUUUU
   |||||:|||||
   AAACCGCCUUUU-ACUAAA 5'
AT2G30550.2      128      147
lipase like protein
```

```
SRNA_AG01_SoLexa_Mi2008_5_6024_hit1
5' CAG-AGAAUGAUGAUCCUGU
   ||| |||||:|||||
   GUCCUCUUACUACUAGGAGU 5'
AT2G30550.2      1560     1579
lipase like protein
```

```
SRNA_AG01_SoLexa_Mi2008_1_30970_hit3
5' UCGAG-UGAGAGAGAUGAUGGU
   |||| |||||:|||||
   CGCUCGACUCUCUCUACCACCA 5'
AT2G30550.2      1586     1607
lipase like protein
```

```
SRNA_AG01_SoLexa_Mi2008_1_26191_hit1
5' UAUUAGGCUGCGAGAGAUC
   | |||||:|||||
   AAAAUCCGACGCUCUAUAG 5'
AT2G30990.3      1313     1331
hypothetical protein
```

```
SRNA_AG01_SoLexa_Mi2008_1_26191_hit1
5' UAUUAGGCUGCGAGAGAUC
   | |||||:|||||
   AAAAUCCGACGCUCUAUAG 5'
AT2G30990.2      1403     1421
hypothetical protein
```

```
SRNA_AG01_SoLexa_Mi2008_1_26191_hit1
5' UAUUAGGCUGCGAGAGAUC
   | |||||:|||||
   AAAAUCCGACGCUCUAUAG 5'
AT2G30990.1      1433     1451
hypothetical protein
```

```
SRNA_AG01_SoLexa_Mi2008_2_32368_hit1
5' UCGGUUUGUUUGCAGAAUCACU
```

leaves\_1sup\_AG01\_SoLexa\_Mi\_Cell\_2008\_hit\_target\_site.txt

||| ||| |:|||||||||||  
AGC-AAA-AGACGUCUAGUGA 5'  
AT2G31010.1 1030 1049  
putative protein kinase

SRNA\_AG01\_SoLexa\_Mi2008\_1\_52000\_hit7  
5' UUGGAAUGUGGUGAACUUGA  
||||| | |||||||||||||  
AACCU-A-ACCACUUGAACU 5'  
AT2G31020.1 2259 2276  
putative oxysterol-binding protein

SRNA\_AG01\_SoLexa\_Mi2008\_1\_41488\_hit1  
5' UGGCGGCGCUGGUGG-UGGU  
||||| ||||||||||| |||||  
CCC GCCUCGACCACCAACCA 5'  
AT2G31020.1 427 446  
putative oxysterol-binding protein

SRNA\_AG01\_SoLexa\_Mi2008\_1\_29031\_hit1  
5' UCAUGUCCUAAGUUGUUGGUC  
||||||| |||||||||||||  
AGUACAG-AUUCAACAACCAG 5'  
AT2G31020.1 648 667  
putative oxysterol-binding protein

SRNA\_AG01\_SoLexa\_Mi2008\_2\_21913\_hit1  
5' UAGAUGU-UGAAGUUGUUGGUC  
:||||||| | |||||||||||||  
GUCUACAGA-UUCAACAACCAG 5'  
AT2G31020.1 648 668  
putative oxysterol-binding protein

SRNA\_AG01\_SoLexa\_Mi2008\_1\_43489\_hit1  
5' UGGUGGCGUUGUUGGUCUUGAA  
||||||| ||||||||| |||||||  
ACCACCACAACAACAAGAACUC 5'  
AT2G31070.1 1037 1058  
unknown protein

SRNA\_AG01\_SoLexa\_Mi2008\_1\_51213\_hit1  
5' UUGAUGUUCUGAUGAG-AUCCU  
||||||||||||||||||| || |  
AACUACAAGACUACUCCUACUA 5'  
AT2G31070.1 1215 1236  
unknown protein

SRNA\_AG01\_SoLexa\_Mi2008\_2\_51261\_hit1  
5' UUGAUUGAUGUUCAGAUGAUGAU  
||| ||||||||||| ||||| |||  
AAC-AACUACAAGACUACUCCUA 5'  
AT2G31070.1 1218 1239  
unknown protein

SRNA\_AG01\_SoLexa\_Mi2008\_6\_14255\_hit369  
5' GAUGAUGAUGAUGAUGAUGAUGAU  
||||||||||| ||| |||||||||  
CUACUACUACCACUCCUACUACUA 5'  
AT2G31070.1 1279 1302  
unknown protein

SRNA\_AG01\_SoLexa\_Mi2008\_1\_3079\_hit472  
5' AUGAUGAUGAUGAUGAUGAUGAUGA

leaves\_1sup\_AG01\_SoLexa\_Mi\_Cell\_2008\_hit\_target\_site.txt

||||||| ||| |||||  
UACUACUACCACUCCUACUACU 5'  
AT2G31070.1 1280 1301  
unknown protein

SRNA\_AG01\_SoLexa\_Mi2008\_1\_45039\_hit3  
5' UG-UGAUGAUGAUGAUGAUGAUGA  
|| ||||| ||| |||||  
ACUACUACUACCACUCCUACUACU 5'  
AT2G31070.1 1281 1304  
unknown protein

SRNA\_AG01\_SoLexa\_Mi2008\_6\_14255\_hit369  
5' GAUGAUGAUGAUGAUGAUGAUGAU  
||||||| ||| |||||  
CUACUACUACUACCACUCCUACUA 5'  
AT2G31070.1 1282 1305  
unknown protein

SRNA\_AG01\_SoLexa\_Mi2008\_1\_3079\_hit472  
5' AUGAUGAUGAUGAUGAUGAUGA  
||||||| ||| |||||  
UACUACUACUACCACUCCUACU 5'  
AT2G31070.1 1283 1304  
unknown protein

SRNA\_AG01\_SoLexa\_Mi2008\_1\_36898\_hit1  
5' UGAGU-UGGAUGAUGAUGAUGA  
||| | || |||||  
ACUAAGAC-UACUACUACUACU 5'  
AT2G31070.1 1452 1472  
unknown protein

SRNA\_AG01\_SoLexa\_Mi2008\_2\_411\_hit5  
5' AAAGAU-GAAGAGAGAAAGAGA  
|||| | |||||  
UUUC-AUCUUCUCUCUUUCUCU 5'  
AT2G31090.1 40 60  
unknown protein

SRNA\_AG01\_SoLexa\_Mi2008\_1\_19407\_hit2  
5' UACAGAGUCGCCGAGAUGGU  
|| ||||| |||  
AU-UCUCAGCGCCUCAACCU 5'  
AT2G31190.1 26 45  
unknown protein

SRNA\_AG01\_SoLexa\_Mi2008\_1\_38236\_hit3  
5' UGCAU-CUGUUGUUGGUGUUGC  
||| | |||:|||||  
ACG-ACGACGACAACCACAACG 5'  
AT2G31370.4 1254 1274  
bZIP transcription factor PosF21 / AtbZip59

SRNA\_AG01\_SoLexa\_Mi2008\_1\_38236\_hit3  
5' UGCAU-CUGUUGUUGGUGUUGC  
||| | |||:|||||  
ACG-ACGACGACAACCACAACG 5'  
AT2G31370.3 1299 1319  
bZIP transcription factor PosF21 / AtbZip59

SRNA\_AG01\_SoLexa\_Mi2008\_1\_38236\_hit3  
5' UGCAU-CUGUUGUUGGUGUUGC

leaves\_1sup\_AG01\_SoLexa\_Mi\_Cell\_2008\_hit\_target\_site.txt

||| | |||:|||||||  
ACG-ACGACGACAACCACAACG 5'  
AT2G31370.1 1351 1371  
bZIP transcription factor PosF21 / AtbZip59

SRNA\_AG01\_SoLexa\_Mi2008\_5\_12942\_hit1  
5' CUUGGGACAGAGUGUG-CUUAC  
||||| ||||||||| ||| |  
GAACC-UGUCUCACACAGAAGG 5'  
AT2G31560.2 95 115  
unknown protein

SRNA\_AG01\_SoLexa\_Mi2008\_1\_7415\_hit1  
5' CAUGUUUGGAUACUUGUUCUG  
||||||| ||||||| |||  
GUACAAACCAAUGAAC-AGAA 5'  
AT2G31890.1 2071 2090  
unknown protein

SRNA\_AG01\_SoLexa\_Mi2008\_1\_37142\_hit1  
5' UGAUCUUUAGUCG-GAUUUGUG  
||||||| || | |||||||  
ACUAGAAAACA-CACUAAACAC 5'  
AT2G31980.1 75 95  
putative cysteine proteinase inhibitor B (cystatin B)

SRNA\_AG01\_SoLexa\_Mi2008\_2\_35642\_hit1  
5' UGACUAG-GUUGAUGAUCGU  
||||| | |||||||||  
ACUGA-CGCAACUACUAGCC 5'  
AT2G31990.1 195 213  
hypothetical protein

SRNA\_AG01\_SoLexa\_Mi2008\_2\_14225\_hit1  
5' GAUGAA-AGAAAGGAAAAGA  
|| ||| |||||||||  
CU-CUUCUCUUUCCUUUUA 5'  
AT2G31990.1 94 112  
hypothetical protein

SRNA\_AG01\_SoLexa\_Mi2008\_1\_43600\_hit1  
5' UGGUGGUUGUCAUUGUGGUAA  
||||||| |||||||||  
ACCACCAACAGUAACCAAUU 5'  
AT2G32100.1 158 178  
Unknown protein (At2g32100; F22D22.15)

SRNA\_AG01\_SoLexa\_Mi2008\_5\_15110\_hit2  
5' GGCGUGCCGGAGUGGUUAU  
|||| | ||||||||| |  
CCGC-CGGCCUCACCAACA 5'  
AT2G32100.1 220 237  
Unknown protein (At2g32100; F22D22.15)

SRNA\_AG01\_SoLexa\_Mi2008\_10\_15948\_hit29  
5' GUGGACGUGCCGGAGUGGUUA  
|||| || |||||||||  
CACC-GC-CGGCCUCACCAAC 5'  
AT2G32100.1 221 239  
Unknown protein (At2g32100; F22D22.15)

SRNA\_AG01\_SoLexa\_Mi2008\_1\_36772\_hit1  
5' UGAGUCGGUGAUUGCAUUGGA

leaves\_1sup\_AG01\_SoLexa\_Mi\_Cell\_2008\_hit\_target\_site.txt

|||||  
ACUCAGCCACUAACGUAACCU 5'  
AT2G32100.1 336 356  
Unknown protein (At2g32100; F22D22.15)

SRNA\_AG01\_SoLexa\_Mi2008\_3\_15340\_hit5  
5' GGUUUGCUAAUUCUCGGAA  
|||||  
CCAAACGAUUAA-AGUCUU 5'  
AT2G32250.3 218 235  
Mutator-like transposase

SRNA\_AG01\_SoLexa\_Mi2008\_1\_56441\_hit1  
5' UUUUGAAUGGUAACUGUCAAGU  
|||||  
AAAACUUACCAUUGAU-GUU-CA 5'  
AT2G32250.4 2938 2958  
Mutator-like transposase

SRNA\_AG01\_SoLexa\_Mi2008\_3\_15340\_hit5  
5' GGUUUGCUAAUUCUCGGAA  
|||||  
CCAAACGAUUAA-AGUCUU 5'  
AT2G32250.4 329 346  
Mutator-like transposase

SRNA\_AG01\_SoLexa\_Mi2008\_1\_27099\_hit1  
5' UCAAGAUGCUUGAGGUUGAUG  
|||||  
AGUUCUACGAACUCCAACUAC 5'  
AT2G32680.1 1016 1036  
putative disease resistance protein

SRNA\_AG01\_SoLexa\_Mi2008\_1\_32535\_hit1  
5' UCGUGCGUGAUGAUGCUUUC  
|||||  
AGCACGCACUACUACGAAAGG 5'  
AT2G32680.1 1951 1971  
putative disease resistance protein

SRNA\_AG01\_SoLexa\_Mi2008\_1\_48497\_hit1  
5' UUCAAGAGGCAACUGUUUGGA  
|||||  
CAGUUUCUCCGAUGACAAACCU 5'  
AT2G32680.1 561 582  
putative disease resistance protein

SRNA\_AG01\_SoLexa\_Mi2008\_1\_10941\_hit1  
5' CUCCUUGGUAUUGAUUUGG  
|||||  
GAGGAACCAUAGCU-AACC 5'  
AT2G32920.1 409 427  
putative protein disulfide isomerase

SRNA\_AG01\_SoLexa\_Mi2008\_2\_9291\_hit50  
5' CGUAAGAAUUGUAUCCUUGUU  
|||||  
UCAUU-UUAACAUAGGAA-AA 5'  
AT2G32920.1 8 26  
putative protein disulfide isomerase

SRNA\_AG01\_SoLexa\_Mi2008\_1\_50341\_hit1  
5' UUGACCCAGAAAGGAGAAUG-GU

leaves\_1sup\_AG01\_SoLexa\_Mi\_Cell\_2008\_hit\_target\_site.txt

||||| ||||| ||||| ||  
AACUCGGUCUUUCCU-UUACACA 5'  
AT2G33020.1 1730 1751  
putative leucine-rich repeat disease resistance protein

SRNA\_AG01\_SoLexa\_Mi2008\_1\_48998\_hit1  
5' UUCCAG-GAAGUGAUUAUCGGAA  
||||| ||||| ||||| |||||  
AAGGUCUCUUCACUAAUAGGCUU 5'  
AT2G33020.1 492 514  
putative leucine-rich repeat disease resistance protein

SRNA\_AG01\_SoLexa\_Mi2008\_3\_18454\_hit1  
5' UAAGUAUGAGUGGGAUCUUGG  
||||| ||||| ||||| |||||  
CUUCA-AGUCACCCUAGAACC 5'  
AT2G33060.1 1041 1060  
putative leucine-rich repeat disease resistance protein

SRNA\_AG01\_SoLexa\_Mi2008\_9\_24533\_hit1  
5' UAUAGGGCCAUGGAAUUUGUU  
||||| ||||| ||||| |||||  
AUAUCCCGGUACCUAAAACAA 5'  
AT2G33060.1 1723 1743  
putative leucine-rich repeat disease resistance protein

SRNA\_AG01\_SoLexa\_Mi2008\_1\_23572\_hit2  
5' UAGGUUGCCCAGUUAUUUGUG  
|||:||||| |||||  
AUCUAACGGGUCACUAAACAC 5'  
AT2G33060.1 2258 2278  
putative leucine-rich repeat disease resistance protein

SRNA\_AG01\_SoLexa\_Mi2008\_1\_48998\_hit1  
5' UUCCAG-GAAGUGAUUAUCGGAA  
||||| ||||| ||||| |||||  
AAGGUCUCUUCACUAAUAUCCUU 5'  
AT2G33060.1 706 728  
putative leucine-rich repeat disease resistance protein

SRNA\_AG01\_SoLexa\_Mi2008\_1\_27099\_hit1  
5' UCAAGAUGCUUGAGGUUGAUG  
|| ||||| ||||| |||||  
AGCUCUACGAACUCCAACUAC 5'  
AT2G33060.1 900 920  
putative leucine-rich repeat disease resistance protein

SRNA\_AG01\_SoLexa\_Mi2008\_4\_22426\_hit32  
5' UAGC-GUUAGGGUUUAGGGUUUA  
|||| || ||||| |||||  
AUCGUCA-UCCCAAUCCCAAAA 5'  
AT2G33210.1 12 33  
mitochondrial chaperonin (HSP60)

SRNA\_AG01\_SoLexa\_Mi2008\_1\_23310\_hit418  
5' UAGGGUUUAGGGUUU-AGGGUUU  
||||| ||||| ||||| |||||  
AUCCCAAUCCCAAAU-GCAA 5'  
AT2G33210.1 6 27  
mitochondrial chaperonin (HSP60)

SRNA\_AG01\_SoLexa\_Mi2008\_1\_52615\_hit7  
5' UUGGGCUUGUAGUUGUUGUAC

leaves\_1sup\_AG01\_SoLexa\_Mi\_Cell\_2008\_hit\_target\_site.txt

|||||  
CACCCGAACAUCAACAUCUU 5'  
AT2G33850.1 708 728  
unknown protein

SRNA\_AG01\_SoLexa\_Mi2008\_4\_52616\_hit19  
5' UUGGGCUUGUAGUUGUUGUAG  
|||||  
CACCCGAACAUCAACAUCUU 5'  
AT2G33850.1 708 728  
unknown protein

SRNA\_AG01\_SoLexa\_Mi2008\_1\_39748\_hit1  
5' UGGAAGCAGAUGGUUCGUU  
|||||  
ACCUUGGUCUACCAAGCUA 5'  
AT2G33860.1 1523 1541  
auxin response transcription factor 3 (ETTIN/ARF3)

SRNA\_AG01\_SoLexa\_Mi2008\_7\_33918\_hit1  
5' UCUUGACCUUGUAAGACCCCA  
|||||:|||||  
AGAACUGGAACGUUCUGGGAG 5'  
AT2G33860.1 1672 1692  
auxin response transcription factor 3 (ETTIN/ARF3)

SRNA\_AG01\_SoLexa\_Mi2008\_7\_49853\_hit1  
5' UUCUUGACCUUGUAAGACCCCA  
|||||:|||||  
AAGAACUGGAACGUUCUGGGAG 5'  
AT2G33860.1 1672 1693  
auxin response transcription factor 3 (ETTIN/ARF3)

SRNA\_AG01\_SoLexa\_Mi2008\_7\_12746\_hit1  
5' CUUGACCUUGUAAGACCCC  
|||||:|||||  
GAACUGGAACGUUCUGGGA 5'  
AT2G33860.1 1673 1691  
auxin response transcription factor 3 (ETTIN/ARF3)

SRNA\_AG01\_SoLexa\_Mi2008\_7\_49852\_hit1  
5' UUCUUGACCUUGUAAGACCCC  
|||||:|||||  
AAGAACUGGAACGUUCUGGGA 5'  
AT2G33860.1 1673 1693  
auxin response transcription factor 3 (ETTIN/ARF3)

SRNA\_AG01\_SoLexa\_Mi2008\_4\_55012\_hit1  
5' UUUCUUGACCUUGUAAGACCCC  
|||||:|||||  
AAAGAACUGGAACGUUCUGGGA 5'  
AT2G33860.1 1673 1694  
auxin response transcription factor 3 (ETTIN/ARF3)

SRNA\_AG01\_SoLexa\_Mi2008\_1\_55011\_hit1  
5' UUUCUUGACCUUGUAAGACCCC  
|||||:|||||  
AAAGAACUGGAACGUUCUGGG 5'  
AT2G33860.1 1674 1694  
auxin response transcription factor 3 (ETTIN/ARF3)

SRNA\_AG01\_SoLexa\_Mi2008\_1\_3\_hit25  
5' AAAAAAAAAA--AGAAAGA

leaves\_1sup\_AG01\_SoLexa\_Mi\_Cell\_2008\_hit\_target\_site.txt

```

|||||:|
UUUUUUUUUUUGAUCUUUUU 5'
AT2G33860.1 173 193
auxin response transcription factor 3 (ETTIN/ARF3)

```

```

SRNA_AG01_SoLexa_Mi2008_1_2_hit38
5' AAA-AAAAAAAAAAACCAU
   ||| |||||
   UUUCUUUUUUUUUUUGAUC 5'
AT2G33860.1 178 197
auxin response transcription factor 3 (ETTIN/ARF3)

```

```

SRNA_AG01_SoLexa_Mi2008_7_12746_hit1
5' CUUGACCUUGUAAGACCCC
   |||||:|||||
   GAACUGGAACGUUCUGGAA 5'
AT2G33860.1 1793 1811
auxin response transcription factor 3 (ETTIN/ARF3)

```

```

SRNA_AG01_SoLexa_Mi2008_7_49852_hit1
5' UUCUUGACCUUGUAAGACCCC
   |||||:|||||
   AAGAACUGGAACGUUCUGGAA 5'
AT2G33860.1 1793 1813
auxin response transcription factor 3 (ETTIN/ARF3)

```

```

SRNA_AG01_SoLexa_Mi2008_4_55012_hit1
5' UUUCUUGACCUUGUAAGACCCC
   |||||:|||||
   AAAGAACUGGAACGUUCUGGAA 5'
AT2G33860.1 1793 1814
auxin response transcription factor 3 (ETTIN/ARF3)

```

```

SRNA_AG01_SoLexa_Mi2008_1_55011_hit1
5' UUUCUUGACCUUGUAAGACCCC
   |||||:|||||
   AAAGAACUGGAACGUUCUGGAA 5'
AT2G33860.1 1794 1814
auxin response transcription factor 3 (ETTIN/ARF3)

```

```

SRNA_AG01_SoLexa_Mi2008_1_42435_hit1
5' UGGGGGGAGGAUACGUGUACU
   |||||
   ACCCCCCUCCUAUGCACAUGA 5'
AT2G33860.1 1901 1921
auxin response transcription factor 3 (ETTIN/ARF3)

```

```

SRNA_AG01_SoLexa_Mi2008_2_52_hit1
5' AAAAA-AGAGAGAUACAGAGAU
   ||||| ||||| |||||
   UUUUUCUCUCUCUUUGUCUCUA 5'
AT2G33860.1 345 366
auxin response transcription factor 3 (ETTIN/ARF3)

```

```

SRNA_AG01_SoLexa_Mi2008_4_13855_hit1
5' GACUGAC-GACAAGAAAGAU
   ||||| | |||||
   CUGAC-GUCUGUUCUUUCUA 5'
AT2G34250.1 321 339
putative protein transport protein SEC61 alpha subunit

```

```

SRNA_AG01_SoLexa_Mi2008_4_13855_hit1
5' GACUGAC-GACAAGAAAGAU

```

leaves\_1sup\_AG01\_SoLexa\_Mi\_Cell\_2008\_hit\_target\_site.txt

||||| | |||||  
CUGAC-GUCUGUUCUUUCUA 5'  
AT2G34250.2 364 382  
putative protein transport protein SEC61 alpha subunit

SRNA\_AG01\_SoLexa\_Mi2008\_1\_55343\_hit1  
5' UUUGAUUUUGUGCAAUGGCCGUUU  
||| ||:|||||  
AAAGUAGAACACGJUACCGUCAAA 5'  
AT2G34357.1 2095 2118  
nodulin-like protein

SRNA\_AG01\_SoLexa\_Mi2008\_2\_7736\_hit1  
5' CCAGAAAAGAAGAAACAAU  
|||||  
CAUCUUUCUUCUUUGUUA 5'  
AT2G34357.1 2484 2502  
nodulin-like protein

SRNA\_AG01\_SoLexa\_Mi2008\_1\_18763\_hit1  
5' UAAUGCACAUGCUGGUGUCCC  
||| |||||  
AUUCCGUGUACGACCA-AGGU 5'  
AT2G34357.1 24 43  
nodulin-like protein

SRNA\_AG01\_SoLexa\_Mi2008\_1\_13442\_hit1  
5' GAAGAGAUUUAGGGAAGAUUG  
:||||| |||||  
UUUCUCCAAAUCCCUU-UAAC 5'  
AT2G34500.1 32 51  
putative cytochrome P450

SRNA\_AG01\_SoLexa\_Mi2008\_1\_56384\_hit12  
5' UUUUCCCGCGCAAAGUGCUCGC  
||||| ||| ||  
AAAAGGGCGCGUUU-ACG-GCU 5'  
AT2G34500.1 932 951  
putative cytochrome P450

SRNA\_AG01\_SoLexa\_Mi2008\_6\_37563\_hit1  
5' UGAUUCUCUGUGUAAGCGAAA  
:||| ||||:|||||  
GCUA-GAGACGCAUUCGCUUU 5'  
AT2G34650.1 399 418  
protein kinase PINOID

SRNA\_AG01\_SoLexa\_Mi2008\_1\_13420\_hit2  
5' GAAGAAGAAGAAGACUCUU  
||||| |||  
CUUCUUCUUCUUCU-A-AA 5'  
AT2G34650.1 46 62  
protein kinase PINOID

SRNA\_AG01\_SoLexa\_Mi2008\_11\_26463\_hit1  
5' UAUUU-CAAGCUUCAGAUUCUCU  
||||| || |||||  
AUAAAAGUCCGAAGUCUA-GAGA 5'  
AT2G34650.1 841 862  
protein kinase PINOID

SRNA\_AG01\_SoLexa\_Mi2008\_2\_8957\_hit1  
5' CGGACCAGGCUUCAUCCCCC

leaves\_1sup\_AG01\_Solexa\_Mi\_Cell\_2008\_hit\_target\_site.txt

|||||  
GCCUGGUCCGAAGUAGGGUUA 5'  
AT2G34710.1 868 888  
homeodomain transcription factor (ATHB-14)

SRNA\_AG01\_Solexa\_Mi2008\_153\_14822\_hit2  
5' GGACCAGGCUUCAUCCCC  
|||||  
CCUGGUCCGAAGUAGGGUU 5'  
AT2G34710.1 869 887  
homeodomain transcription factor (ATHB-14)

SRNA\_AG01\_Solexa\_Mi2008\_219\_8956\_hit2  
5' CGGACCAGGCUUCAUCCCC  
|||||  
GCCUGGUCCGAAGUAGGGUU 5'  
AT2G34710.1 869 888  
homeodomain transcription factor (ATHB-14)

SRNA\_AG01\_Solexa\_Mi2008\_1063\_31727\_hit2  
5' UCGGACCAGGCUUCAUCCCC  
:|||||  
GGCCUGGUCCGAAGUAGGGUU 5'  
AT2G34710.1 869 889  
homeodomain transcription factor (ATHB-14)

SRNA\_AG01\_Solexa\_Mi2008\_4\_8955\_hit2  
5' CGGACCAGGCUUCAUCCCC  
|||||  
GCCUGGUCCGAAGUAGGGU 5'  
AT2G34710.1 870 888  
homeodomain transcription factor (ATHB-14)

SRNA\_AG01\_Solexa\_Mi2008\_8\_8960\_hit4  
5' CGGACCAGGCUUCAUCCCC  
|||||  
GCCUGGUCCGAAGU-AGGGUU 5'  
AT2G34710.1 870 889  
homeodomain transcription factor (ATHB-14)

SRNA\_AG01\_Solexa\_Mi2008\_47\_31726\_hit2  
5' UCGGACCAGGCUUCAUCCCC  
:|||||  
GGCCUGGUCCGAAGUAGGGU 5'  
AT2G34710.1 870 889  
homeodomain transcription factor (ATHB-14)

SRNA\_AG01\_Solexa\_Mi2008\_310\_14823\_hit7  
5' GGACCAGGCUUCAUCCCC  
|||||  
CCUGGUCCGAAGU-AGGGU 5'  
AT2G34710.1 871 888  
homeodomain transcription factor (ATHB-14)

SRNA\_AG01\_Solexa\_Mi2008\_641\_8959\_hit7  
5' CGGACCAGGCUUCAUCCCC  
|||||  
GCCUGGUCCGAAGU-AGGGU 5'  
AT2G34710.1 871 889  
homeodomain transcription factor (ATHB-14)

SRNA\_AG01\_Solexa\_Mi2008\_2\_31725\_hit2  
5' UCGGACCAGGCUUCAUCCC

leaves\_1sup\_AG01\_Solexa\_Mi\_Cell\_2008\_hit\_target\_site.txt

:|||||||  
GGCCUGGUCCGAAGUAGGG 5'  
AT2G34710.1 871 889  
homeodomain transcription factor (ATHB-14)

SRNA\_AG01\_Solexa\_Mi2008\_4138\_31731\_hit7  
5' UCGGACCAGGCUUCAUCCCC  
|||||||  
CGCCUGGUCCGAAGU-AGGGU 5'  
AT2G34710.1 871 890  
homeodomain transcription factor (ATHB-14)

SRNA\_AG01\_Solexa\_Mi2008\_1\_8958\_hit7  
5' CGGACCAGGCUUCAUCCCC  
|||||||  
GCCUGGUCCGAAGU-AGGG 5'  
AT2G34710.1 872 889  
homeodomain transcription factor (ATHB-14)

SRNA\_AG01\_Solexa\_Mi2008\_15\_11085\_hit1  
5' CUCGGACCAGGCUUCAUCC  
:|||||||  
AGGCCUGGUCCGAAGUAGG 5'  
AT2G34710.1 872 890  
homeodomain transcription factor (ATHB-14)

SRNA\_AG01\_Solexa\_Mi2008\_98\_31730\_hit7  
5' UCGGACCAGGCUUCAUCCCC  
|||||||  
CGCCUGGUCCGAAGU-AGGG 5'  
AT2G34710.1 872 890  
homeodomain transcription factor (ATHB-14)

SRNA\_AG01\_Solexa\_Mi2008\_1\_11087\_hit3  
5' CUCGGACCAGGCUUCAUCCCC  
|||||||  
UCGCCUGGUCCGAAGU-AGGG 5'  
AT2G34710.1 872 891  
homeodomain transcription factor (ATHB-14)

SRNA\_AG01\_Solexa\_Mi2008\_33\_15725\_hit3  
5' GUCGGACCAGGCUUCAUCCCC  
:|||||||  
UCGCCUGGUCCGAAGU-AGGG 5'  
AT2G34710.1 872 891  
homeodomain transcription factor (ATHB-14)

SRNA\_AG01\_Solexa\_Mi2008\_68\_49390\_hit1  
5' UUCGGACCAGGCUUCAUCCCC  
|||||||  
UCGCCUGGUCCGAAGU-AGGG 5'  
AT2G34710.1 872 891  
homeodomain transcription factor (ATHB-14)

SRNA\_AG01\_Solexa\_Mi2008\_6\_31729\_hit7  
5' UCGGACCAGGCUUCAUCC  
|||||||  
CGCCUGGUCCGAAGU-AGG 5'  
AT2G34710.1 873 890  
homeodomain transcription factor (ATHB-14)

SRNA\_AG01\_Solexa\_Mi2008\_1\_49389\_hit1  
5' UUCGGACCAGGCUUCAUCC

leaves\_1sup\_AG01\_SoLexa\_Mi\_Cell\_2008\_hit\_target\_site.txt

|||||  
UCGCCUGGUCCGAAGU-AGG 5'  
AT2G34710.1 873 891  
homeodomain transcription factor (ATHB-14)

SRNA\_AG01\_SoLexa\_Mi2008\_2\_10634\_hit2  
5' CUCAAGAGAAUCAACAUCUC  
|||||:|||||  
GAGUUCUUUUAGUUGUAGGCC 5'  
AT2G34730.1 105 125  
putative myosin heavy chain

SRNA\_AG01\_SoLexa\_Mi2008\_3\_15619\_hit2  
5' GUCAUAUGCUUGUCUCAA  
|||||  
AAGUAUACGAAGAGAGUUG 5'  
AT2G34730.1 1496 1514  
putative myosin heavy chain

SRNA\_AG01\_SoLexa\_Mi2008\_4\_4686\_hit27  
5' CAAGAUGUGUACAGAAGCAAC  
||| ||| |||||||  
GUUGUAC-CAUGUCUUCGUUU 5'  
AT2G34730.1 282 301  
putative myosin heavy chain

SRNA\_AG01\_SoLexa\_Mi2008\_3\_22089\_hit3  
5' UAGCA-GCAAGGGUAAAUGGU  
||||| ||||||| |||||||  
AUCGUUCGUUCCAGUUUACCC 5'  
AT2G34750.1 1748 1769

SRNA\_AG01\_SoLexa\_Mi2008\_1\_40637\_hit1  
5' UGGAGGUGGAACGAGAG-UGCU  
||||| ||||||| || |||||  
ACCUCCACCUUGCU-UCAACGA 5'  
AT2G34750.1 606 626

SRNA\_AG01\_SoLexa\_Mi2008\_3\_12851\_hit1  
5' CUUGCCAAGUAGAAGAUCUUU  
||||| ||||||| |||||||  
GAACGAUUCUUCGAGAAA 5'  
AT2G34940.1 743 763  
putative vacuolar sorting receptor

SRNA\_AG01\_SoLexa\_Mi2008\_2\_39871\_hit2  
5' UGGAAUUUUCGUGUUGGUUCA  
:||||| |||||||  
UUCUUAAAAACACAACCAAGU 5'  
AT2G35020.1 685 705  
putative UDP-N-acetylglucosamine pyrophosphorylase

SRNA\_AG01\_SoLexa\_Mi2008\_1\_39870\_hit2  
5' UGGAAUUUUCGUGUUGGUUC  
:||||| |||||||  
UUCUUAAAAACACAACCAAG 5'  
AT2G35020.1 686 705  
putative UDP-N-acetylglucosamine pyrophosphorylase

SRNA\_AG01\_SoLexa\_Mi2008\_2\_13419\_hit2  
5' GAAGAAGAAGAAGACACUU  
||||| ||  
CUUCUUCUUCUUCU-UGUC 5'

AT2G35480.1 887 904  
 unknown protein

SRNA\_AG01\_SoLexa\_Mi2008\_4\_21443\_hit1  
 5' UAGAGGGUGAAAU-UCUAAUGAG  
 ||||| |||| | |||||  
 AUCUCCGACUU-AGAGAUUACUC 5'  
 AT2G35930.1 453 474  
 unknown protein

SRNA\_AG01\_SoLexa\_Mi2008\_1\_56003\_hit1  
 5' UUUGGUUCGGUAUUGGAUU-GGUU  
 ||||| ||||| ||||  
 AAACCAAGCCCA-AACCUAUCCAA 5'  
 AT2G36270.1 849 872  
 bZip transcription factor AtbZip39

SRNA\_AG01\_SoLexa\_Mi2008\_1\_10194\_hit1  
 5' CUAGCCACCGUCUGAAGAUC  
 |||| ||||:|||||  
 UAUCG-UGGCGGACUUCUAGG 5'  
 AT2G36300.1 189 208  
 unknown protein

SRNA\_AG01\_SoLexa\_Mi2008\_6\_1263\_hit1  
 5' ACAAGAAGAGAGACGAGUAGU  
 ||||| ||||| ||||  
 UGUUCUUCUCUCUUCUC-UCA 5'  
 AT2G36300.1 882 901  
 unknown protein

SRNA\_AG01\_SoLexa\_Mi2008\_2\_43059\_hit1  
 5' UGGUCAUCUUAGCAUAGUGCU  
 ||||| ||||| |||||  
 ACCAGUAGAAUCGUAUCACGA 5'  
 AT2G36530.1 1008 1028  
 enolase (2-phospho-D-glycerate hydroxylase)

SRNA\_AG01\_SoLexa\_Mi2008\_2\_7736\_hit1  
 5' CCAGA-AAAGAAGAAACAAU  
 |||:| ||||| |||||  
 GGUUUGUUUCUUCUUGUUU 5'  
 AT2G36530.1 1512 1531  
 enolase (2-phospho-D-glycerate hydroxylase)

SRNA\_AG01\_SoLexa\_Mi2008\_1\_13536\_hit1  
 5' GAAGUUCAAGUCCAUAGGUCC  
 ||||| |||||  
 CUUCAAGUUCAGC-AUCCAGA 5'  
 AT2G36530.1 865 884  
 enolase (2-phospho-D-glycerate hydroxylase)

SRNA\_AG01\_SoLexa\_Mi2008\_1\_37996\_hit1  
 5' UGCAGACAAGAGUG-AUACCAGA  
 ||||| ||||| |||||  
 ACGUCUGUUCACACAUUGGUU 5'  
 AT2G36850.1 1481 1503  
 putative glucan synthase

SRNA\_AG01\_SoLexa\_Mi2008\_1\_16322\_hit2  
 5' UAAAACAACCCACG-GU-GCCA  
 ||||| ||||| |||||  
 CUUUUGUUGGGUGCUCUACGGU 5'

leaves\_1sup\_AG01\_SoLexa\_Mi\_Cell\_2008\_hit\_target\_site.txt

AT2G36850.1 4638 4659  
putative glucan synthase

SRNA\_AG01\_SoLexa\_Mi2008\_1\_49540\_hit1

5' UUCGGUGUUGGUUCGACUC  
|||||  
AAGCCACAACCA--CUGAA 5'

AT2G37080.1 1755 1771  
putative myosin heavy chain

SRNA\_AG01\_SoLexa\_Mi2008\_32\_5888\_hit1

5' CAGAAAGGUAGUUCACGAG  
|| ||| |||||  
GU-UUUC-AUCAAGUGCUA 5'

AT2G37080.1 2143 2159  
putative myosin heavy chain

SRNA\_AG01\_SoLexa\_Mi2008\_1\_50617\_hit1

5' UUGAGCUAUGGAUAUCAUCUUC  
|||||  
AACUCGAUACCUAUAGUAGAAG 5'

AT2G37080.1 94 115  
putative myosin heavy chain

SRNA\_AG01\_SoLexa\_Mi2008\_1\_352\_hit1

5' AAAGAAGAAGAUAAAAGGA  
||||| |||||  
UUUCUUCUUCU-UUUUCAU 5'

AT2G37110.1 62 79  
unknown protein

SRNA\_AG01\_SoLexa\_Mi2008\_1\_37677\_hit4

5' UGCAAAGACCAUCAAUUGAUUG  
||||| ||||| |||:  
ACGUUCCUGGUAGUUA-UAAU 5'

AT2G37130.1 1055 1074  
putative peroxidase ATP2a

SRNA\_AG01\_SoLexa\_Mi2008\_1\_37677\_hit4

5' UGCAAAGACCAUCAAUUGAUUG  
||||| ||||| |||:  
ACGUUCCUGGUAGUUA-UAAU 5'

AT2G37130.2 955 974  
putative peroxidase ATP2a

SRNA\_AG01\_SoLexa\_Mi2008\_2\_7000\_hit28

5' CAUCAGGUACUCCAGCGUUCU  
||||| ||||| || |||  
GUAGUCCAGGAAGGU-GC-AGA 5'

AT2G37180.1 80 99  
aquaporin (plasma membrane intrinsic protein 2C)

SRNA\_AG01\_SoLexa\_Mi2008\_2\_411\_hit5

5' AAAGAUGAAGAGAGAAAGAGA  
||||| ||||| || |||  
UUUCUACUUCUCU-UUACUCA 5'

AT2G37400.1 91 110  
unknown protein

SRNA\_AG01\_SoLexa\_Mi2008\_1\_19866\_hit1

5' UACCGAUUGUGUCCCGCAA  
||||| ||||| |||  
CUGGCUAACACAAGGAG-GUU 5'

AT2G37410.2 254 273  
translocase like protein

SRNA\_AG01\_SoLexa\_Mi2008\_1\_19866\_hit1

5' UACCGAUUGUGUCCCUCGCAA  
|||||  
CUGGCUAACACAAGGAG-GUU 5'  
AT2G37410.1 299 318  
translocase like protein

SRNA\_AG01\_SoLexa\_Mi2008\_1\_34620\_hit1

5' UGAAGAUGAUGAUGAAGUU  
||| |||||  
ACUACUACUACUACUUCGA 5'  
AT2G37410.2 698 716  
translocase like protein

SRNA\_AG01\_SoLexa\_Mi2008\_1\_37225\_hit4

5' UGAUGAUGAUGAUGAAGAAG  
|||||  
ACUACUACUACUACUACUUC 5'  
AT2G37410.2 700 722  
translocase like protein

SRNA\_AG01\_SoLexa\_Mi2008\_9\_14254\_hit8

5' GAUGAUGAUGAUGAUGAUCUU  
|||||  
CUACUACUACUACUACUUC 5'  
AT2G37410.2 701 721  
translocase like protein

SRNA\_AG01\_SoLexa\_Mi2008\_6\_14255\_hit369

5' GAUGAUGAUGAUGAUGAUGAU  
|||||  
GUACUACUACUACUACUACUUC 5'  
AT2G37410.2 701 724  
translocase like protein

SRNA\_AG01\_SoLexa\_Mi2008\_1\_14256\_hit8

5' GAUGAUGAUGAUGAUGAUGUU  
|||||  
GUACUACUACUACUACUACUUC 5'  
AT2G37410.2 701 724  
translocase like protein

SRNA\_AG01\_SoLexa\_Mi2008\_7\_3078\_hit1

5' AUGAUGAUGA-GAAUGAUGAU  
|||||  
UACUACUACUACU-ACUACUUC 5'  
AT2G37410.2 702 721  
translocase like protein

SRNA\_AG01\_SoLexa\_Mi2008\_1\_36323\_hit13

5' UGAGGAUGAUGAUGAUGAUGA  
||| |||||  
ACUACUACUACUACUACUUC 5'  
AT2G37410.2 702 722  
translocase like protein

SRNA\_AG01\_SoLexa\_Mi2008\_1\_3079\_hit472

5' AUGAUGAUGAUGAUGAUGAUGA  
|||||  
UACUACUACUACUACUACUUC 5'

AT2G37410.2 702 723  
translocase like protein

SRNA\_AG01\_SoLexa\_Mi2008\_1\_45039\_hit3

5' UGUGAUGAUGAUGAUGAUGAUGA  
::|||||  
GUACUACUACUACUACUACU 5'

AT2G37410.2 702 724  
translocase like protein

SRNA\_AG01\_SoLexa\_Mi2008\_1\_56092\_hit3

5' UUUG-UGAUGAUGAUGAUGAUGA  
||| |||||  
CAACUACUACUACUACUACU 5'

AT2G37410.2 703 725  
translocase like protein

SRNA\_AG01\_SoLexa\_Mi2008\_7\_3078\_hit1

5' AUGAUGAUGA-GAAUGAUGAU  
||||| | |||||  
UACUACUACUAC-UACUACUA 5'

AT2G37410.2 705 724  
translocase like protein

SRNA\_AG01\_SoLexa\_Mi2008\_1\_34620\_hit1

5' UGAAGAUGAUGAUGAAGUU  
||| |||||:  
ACUACUACUACUUCGA 5'

AT2G37410.1 743 761  
translocase like protein

SRNA\_AG01\_SoLexa\_Mi2008\_1\_37225\_hit4

5' UGAUGAUGAUGAUGAUGAAGAAG  
||||| |||||  
ACUACUACUACUACUACUUC 5'

AT2G37410.1 745 767  
translocase like protein

SRNA\_AG01\_SoLexa\_Mi2008\_9\_14254\_hit8

5' GAUGAUGAUGAUGAUGAUCUU  
|||||  
CUACUACUACUACUACUUC 5'

AT2G37410.1 746 766  
translocase like protein

SRNA\_AG01\_SoLexa\_Mi2008\_6\_14255\_hit369

5' GAUGAUGAUGAUGAUGAUGAUGAU  
|||||  
GUACUACUACUACUACUACUU 5'

AT2G37410.1 746 769  
translocase like protein

SRNA\_AG01\_SoLexa\_Mi2008\_1\_14256\_hit8

5' GAUGAUGAUGAUGAUGAUGAUGUU  
|||||  
GUACUACUACUACUACUACUU 5'

AT2G37410.1 746 769  
translocase like protein

SRNA\_AG01\_SoLexa\_Mi2008\_7\_3078\_hit1

5' AUGAUGAUGA-GAAUGAUGAU  
||||| | |||||  
UACUACUACUAC-UACUACUU 5'

AT2G37410.1 747 766  
translocase like protein

SRNA\_AG01\_SoLexa\_Mi2008\_1\_36323\_hit13

5' UGAGGAUGAUGAUGAUGAUGA  
||| ||||||||||||||||  
ACUACUACUACUACUACU 5'  
AT2G37410.1 747 767  
translocase like protein

SRNA\_AG01\_SoLexa\_Mi2008\_1\_3079\_hit472

5' AUGAUGAUGAUGAUGAUGAUGA  
||||||||||||||||||  
UACUACUACUACUACUACU 5'  
AT2G37410.1 747 768  
translocase like protein

SRNA\_AG01\_SoLexa\_Mi2008\_1\_45039\_hit3

5' UGUGAUGAUGAUGAUGAUGAUGA  
::||||||||||||||  
GUACUACUACUACUACUACU 5'  
AT2G37410.1 747 769  
translocase like protein

SRNA\_AG01\_SoLexa\_Mi2008\_1\_56092\_hit3

5' UUUG-UGAUGAUGAUGAUGAUGA  
||| ||||||||||||||||  
CAACUACUACUACUACUACU 5'  
AT2G37410.1 748 770  
translocase like protein

SRNA\_AG01\_SoLexa\_Mi2008\_7\_3078\_hit1

5' AUGAUGAUGA-GAAUGAUGAU  
||||||| || |||||  
UACUACUACUACU-ACUACUA 5'  
AT2G37410.1 750 769  
translocase like protein

SRNA\_AG01\_SoLexa\_Mi2008\_1\_3728\_hit1

5' AUUGGAUGCCAUG-GAAAUAGA  
||||||| || | |||||  
UAACCUACUGU-CUCUUUAUCU 5'  
AT2G37410.2 853 873  
translocase like protein

SRNA\_AG01\_SoLexa\_Mi2008\_1\_3728\_hit1

5' AUUGGAUGCCAUG-GAAAUAGA  
||||||| || | |||||  
UAACCUACUGU-CUCUUUAUCU 5'  
AT2G37410.1 898 918  
translocase like protein

SRNA\_AG01\_SoLexa\_Mi2008\_1\_10933\_hit5

5' CUCCUGAAUCUCCGACAA  
||||| | |||||||||  
GAGGA-U-AGAAGGCUGUU 5'  
AT2G37640.1 527 543  
Expansin (AtEXPA3)

SRNA\_AG01\_SoLexa\_Mi2008\_2\_25192\_hit1

5' UAUCUUUUGCGUCCUAUCUCC  
||||||| | |||||||||  
UUAGAAUAGGGAGGAUAGAAGG 5'

leaves\_1sup\_AG01\_SoLexa\_Mi\_Cell\_2008\_hit\_target\_site.txt

AT2G37640.1 531 552  
Expansin (AtEXPA3)

SRNA\_AG01\_SoLexa\_Mi2008\_1\_1205\_hit1

5' AAUUGAAUGGACCUUUCUC  
| | | | | | | | | | | | | | | | | |  
AGAACUUAACUGGAAAGAG 5'

AT2G37710.1 580 598  
putative receptor-like protein kinase

SRNA\_AG01\_SoLexa\_Mi2008\_2\_50007\_hit1

5' UUGAACCGCACAUUACCGCU  
| | | | | | | | | | | | | | | | | |  
AACU-GGCGUGAACAUUGGCGG 5'

AT2G37800.1 206 225  
hypothetical protein

SRNA\_AG01\_SoLexa\_Mi2008\_1\_14\_hit1

5' AAAA-AAACAGAGAACAAGAAGA  
| | | | | | | | | | | | | | | | | |  
UUUUCUUUGUCUCGUUUUCUUCU 5'

AT2G38120.1 107 129  
unknown protein

SRNA\_AG01\_SoLexa\_Mi2008\_3\_13907\_hit1

5' GAGAAGAGAUAGAAU-AGAAU  
| | | | | | | | | | | | | | | | | |  
CUCUUCUCUUUCUUAGUCUUC 5'

AT2G38120.1 238 258  
unknown protein

SRNA\_AG01\_SoLexa\_Mi2008\_13\_35786\_hit1

5' UGAGAAGAGAUAGAAU-AGAAU  
| | | | | | | | | | | | | | | | | |  
ACUCUUCUCUUUCUUAGUCUUC 5'

AT2G38120.1 238 259  
unknown protein

SRNA\_AG01\_SoLexa\_Mi2008\_13\_13906\_hit2

5' GAGAAGAGAUAGAAU-AGAA  
| | | | | | | | | | | | | | | | | |  
CUCUUCUCUUUCUUAGUCUU 5'

AT2G38120.1 239 258  
unknown protein

SRNA\_AG01\_SoLexa\_Mi2008\_4\_35785\_hit2

5' UGAGAAGAGAUAGAAU-AGAA  
| | | | | | | | | | | | | | | | | |  
ACUCUUCUCUUUCUUAGUCUU 5'

AT2G38120.1 239 259  
unknown protein

SRNA\_AG01\_SoLexa\_Mi2008\_40\_50469\_hit1

5' UU-GAGAAGAGAUAGAAU-AGAA  
| | | | | | | | | | | | | | | | | |  
AAUCUCUUCUCUUUCUUAGUCUU 5'

AT2G38120.1 239 261  
unknown protein

SRNA\_AG01\_SoLexa\_Mi2008\_1\_35784\_hit2

5' UGAGAAGAGAUAGAAU-AGA  
| | | | | | | | | | | | | | | | | |  
ACUCUUCUCUUUCUUAGUCU 5'

AT2G38120.1 240 259  
unknown protein

SRNA\_AG01\_SoLexa\_Mi2008\_1\_34613\_hit1

5' UGAAG-AUGAAGAUGAGUUGU  
||||| ||||| |||||  
ACUCCUACUCCUACUCAACU 5'  
AT2G38180.1 314 334  
unknown protein

SRNA\_AG01\_SoLexa\_Mi2008\_1\_174\_hit2

5' AAAAGAAGAAGAUAAAGCAUUAU  
||||| ||||| ||| |||||  
UUUUUUUUUUUUUUUAGUAUC 5'  
AT2G38290.1 1514 1535  
putative ammonium transporter

SRNA\_AG01\_SoLexa\_Mi2008\_1\_174\_hit2

5' AAAAGAAGAAGAUAAAGCAUUAU  
||||| ||||| ||| |||||  
UUUUUUUUUUUUUUUAGUAUC 5'  
AT2G38290.2 1593 1614  
putative ammonium transporter

SRNA\_AG01\_SoLexa\_Mi2008\_1\_17161\_hit1

5' UAACAAGACCUGGCCACACAUC  
||||| ||||| ||| |||||  
AUUGUUCUGGACCG-UAUG-AG 5'  
AT2G38290.2 194 213  
putative ammonium transporter

SRNA\_AG01\_SoLexa\_Mi2008\_1\_4535\_hit1

5' CAAGAAAAACGAAGAUUUUAU  
||||| ||||| ||| |||||  
AUUCUUUUUUGCUU-UUAAUA 5'  
AT2G38940.1 1802 1821  
phosphate transporter (AtPT2)

SRNA\_AG01\_SoLexa\_Mi2008\_1\_15927\_hit2

5' GUGCUUGAAAUGUCGGGAGG  
||||| ||||| |||:|||  
CACGAACUUUA-AGCUCUCA 5'  
AT2G39530.1 191 210  
unknown protein

SRNA\_AG01\_SoLexa\_Mi2008\_1\_5984\_hit23

5' CAGA-CAGAAAAUAAAACAC  
||| ||||| ||||| |||  
AUCUUGUCUUUUUUUUUGAG 5'  
AT2G39550.1 1303 1322  
putative geranylgeranyl transferase type I beta subunit

SRNA\_AG01\_SoLexa\_Mi2008\_1\_51471\_hit6

5' UUGCCAAGAACA-UCUUCGUUA  
||||| ||||| ||| |||||  
AACGGUUCUUGUAAGUAGCAAU 5'  
AT2G39580.1 2569 2590  
unknown protein

SRNA\_AG01\_SoLexa\_Mi2008\_1\_36795\_hit1

5' UG-AGUGAGAGAUUAAGAUCAU  
||| ||||| ||||| |||  
ACGUCUCUCUAAUUCUA-UA 5'

AT2G39580.1 4024 4044  
unknown protein

SRNA\_AG01\_SoLexa\_Mi2008\_3\_13421\_hit1  
5' GAAGAAGAAGAUGAUGUUGAU  
| | | | | | | | | | | | | | | | | |  
CUUCUUCUUCUACAAC-ACUU 5'  
AT2G39725.1 65 84  
unknown protein

SRNA\_AG01\_SoLexa\_Mi2008\_1\_17143\_hit1  
5' UAACAAAUGAUGUGGCACGUG  
| | | | | | | | | | | | | | | | | |  
AUUGUUUACUUCACCGCGCAC 5'  
AT2G39800.1 117 137  
delta-1-pyrroline 5-carboxylase synthetase (P5C1)

SRNA\_AG01\_SoLexa\_Mi2008\_1\_2355\_hit1  
5' AUAACAAAUGACGUGGCACGUG  
| | | | | | | | | | | | | | | | | |  
GAUUGUUUACUUCACCGCGCAC 5'  
AT2G39800.1 117 138  
delta-1-pyrroline 5-carboxylase synthetase (P5C1)

SRNA\_AG01\_SoLexa\_Mi2008\_1\_3\_hit25  
5' AAAAAAA-AAAA-AAGAAAGA  
| | | | | | | | | | | | | | | | | |  
UUUUUUUCUUUUUGUUCUUUCG 5'  
AT2G39820.1 789 809  
putative translation initiation factor

SRNA\_AG01\_SoLexa\_Mi2008\_9\_4565\_hit2  
5' CAAGAAGAAUUUAAGUACU  
| | | | | | | | | | | | | | | | | |  
GUUCUUCUUUAA-UGAUGA 5'  
AT2G39820.1 862 879  
putative translation initiation factor

SRNA\_AG01\_SoLexa\_Mi2008\_2\_47421\_hit1  
5' UUAGAGUGUUGAAUGUGAA  
| | | | | | | | | | | | | | | | | |  
AAUCUCACAACU-ACUCUU 5'  
AT2G40750.1 213 230  
unknown protein

SRNA\_AG01\_SoLexa\_Mi2008\_1\_45467\_hit2  
5' UGUGGUAGCCACUGUA-GUGA  
| | | | | | | | | | | | | | | | | |  
ACACCAUCGGUUACAUACACU 5'  
AT2G40750.1 722 742  
unknown protein

SRNA\_AG01\_SoLexa\_Mi2008\_4\_48898\_hit1  
5' UUCAUGUGUUGGUGAAGGAAG  
| | | | | | | | | | | | | | | | | |  
AAGUACAUAACCAC-UCCUUU 5'  
AT2G40770.1 3899 3918  
putative SNF2/SWI2 family transcription factor

SRNA\_AG01\_SoLexa\_Mi2008\_4\_14762\_hit1  
5' GCUCAAGUAUAGAA-ACGCU  
: | | | | | | | | | | | | | | | | | |  
UGAGUUUCAUAUCUUCUG-GA 5'

AT2G40770.1 5146 5165  
putative SNF2/SWI2 family transcription factor

SRNA\_AG01\_SoLexa\_Mi2008\_1\_38224\_hit4

5' UGCAUCAUUGGUGGUGUGAG  
||| | |||||  
ACG-A-UAACCACCACACUC 5'

AT2G40940.1 174 191  
ethylene response sensor (ERS)

SRNA\_AG01\_SoLexa\_Mi2008\_1\_4591\_hit1

5' CAAGACAAGGAGUUUACC  
|||:|||||  
GUUCUGUUUCUAAAUGG 5'

AT2G40940.1 753 771  
ethylene response sensor (ERS)

SRNA\_AG01\_SoLexa\_Mi2008\_1\_3647\_hit1

5' AUUGAAC-GAGAUGAUGAUU-GG  
||| | ||||| ||  
UAACUAGGCUCUACUACUAAUC 5'

AT2G40970.1 304 326  
unknown protein

SRNA\_AG01\_SoLexa\_Mi2008\_1\_35931\_hit1

5' UGAGAGUG-AGGAGAUGAUGCGU  
||| | |||:|||||  
ACUCUC-CAUCCUUUACUACGCA 5'

AT2G41190.1 1126 1147  
unknown protein

SRNA\_AG01\_SoLexa\_Mi2008\_1\_20735\_hit4

5' UACUUUUUCG-GGCAUUUUUGUG  
||| ||| ||| |||  
AUGAAAAGCUCC-UAAACACAC 5'

AT2G41190.1 27 48  
unknown protein

SRNA\_AG01\_SoLexa\_Mi2008\_51\_8316\_hit10

5' CGAAGAUGGGUUUCACG-GCGA  
||| |||:||||| |||  
GCU-CUACUAAAAGUGCUCGCU 5'

AT2G41220.1 4201 4222  
ferredoxin-dependent glutamate synthase (GLU2)

SRNA\_AG01\_SoLexa\_Mi2008\_1\_42\_hit14

5' AAAAAACAGAAAACAAUGGAU  
||| | |||||  
UUUUUU-U-UUUUGUUACCUA 5'

AT2G41220.1 5432 5450  
ferredoxin-dependent glutamate synthase (GLU2)

SRNA\_AG01\_SoLexa\_Mi2008\_5\_154\_hit2

5' AAA-A-CAUCAUUUACAAUCGU  
||| | |||||  
UUUCUCGUAGUAAAUGUUAGAA 5'

AT2G41220.1 637 658  
ferredoxin-dependent glutamate synthase (GLU2)

SRNA\_AG01\_SoLexa\_Mi2008\_1\_5010\_hit1

5' CAAGUGC-AUUAAGAACAUCAU  
||| | ||| |||  
GUUCACGAU-AUUCUCGUAGUA 5'

AT2G41220.1 647 667  
 ferredoxin-dependent glutamate synthase (GLU2)

SRNA\_AG01\_SoLexa\_Mi2008\_2\_411\_hit5

5' AA-AGAUGA-AGAGAGAAAGAGA  
 || ||| || |||||  
 UUCUCUCCUAUCUCUCUUUCUCU 5'

AT2G41640.1 295 317  
 unknown protein

SRNA\_AG01\_SoLexa\_Mi2008\_1\_13292\_hit1

5' CUUUUGUGUUG-UACUUGGUU  
 ||||| || |||||  
 GAAAACACAACAAU-AACCAC 5'

AT2G41640.1 559 578  
 unknown protein

SRNA\_AG01\_SoLexa\_Mi2008\_1\_45992\_hit2

5' UGUUGCAAUGUUGUGAAGUUA  
 ||||| ||||:|||||  
 ACAACAUUACGACACUCAAU 5'

AT2G41640.1 785 805  
 unknown protein

SRNA\_AG01\_SoLexa\_Mi2008\_1\_10568\_hit2

5' CUAUUUCAAGUUAAGCA-CUCC  
 || |||| ||||| |||||  
 GA-AAAGGUCAAGUUCGUCGAGG 5'

AT2G41650.1 148 169  
 unknown protein

SRNA\_AG01\_SoLexa\_Mi2008\_3\_53389\_hit2

5' UUGUCAGGUGGGGAGU-UUG  
 ||||| ||||| ||  
 AACAGUCAACCCCUCAUAAA 5'

AT2G42300.2 231 250  
 putative bHLH transcription factor (bHLH048)

SRNA\_AG01\_SoLexa\_Mi2008\_3\_53389\_hit2

5' UUGUCAGGUGGGGAGU-UUG  
 ||||| ||||| ||  
 AACAGUCAACCCCUCAUAAA 5'

AT2G42300.1 232 251  
 putative bHLH transcription factor (bHLH048)

SRNA\_AG01\_SoLexa\_Mi2008\_2\_411\_hit5

5' AAAGAUGAAGAGAGAAAGA-GA  
 ||||| ||||| || |||||  
 UUUCUACUUCUCGC-UUCUGCU 5'

AT2G42360.1 243 263  
 putative RING zinc finger protein

SRNA\_AG01\_SoLexa\_Mi2008\_1\_189\_hit14

5' AAAAGAGGAGAAGA-CAAAGUGU  
 ||||| ||||| |||||  
 GUUUCUCCUCUUCUGUUU-ACA 5'

AT2G42890.1 154 175  
 MEI2-like protein (MEI2)

SRNA\_AG01\_SoLexa\_Mi2008\_3\_21212\_hit1

5' UAGAGAGAGAAAAAGAUGGC  
 :|||||  
 GUCUCUCUCUUUUU-UACCU 5'

AT2G42890.1 25 43  
MEI2-like protein (MEI2)

SRNA\_AG01\_SoLexa\_Mi2008\_1\_189\_hit14

5' AAAAGAGGAGAAGACAAAGU-GU  
||||| ||||||| ||| ||  
UUUUCUACUCUUCUG-UUCAGCA 5'

AT2G43020.1 316 337  
putative amine oxidase

SRNA\_AG01\_SoLexa\_Mi2008\_1\_41735\_hit1

5' UGGGAAGCA-AUCGUGAUGGUUU  
||||| | || |||||||  
ACCCUUC-UCUACCACUACCAA 5'

AT2G43200.1 107 128  
hypothetical protein

SRNA\_AG01\_SoLexa\_Mi2008\_6\_15650\_hit4

5' GUCCCAUUGGA-AGUUUGA  
||||||||| | |||||  
AAGGGUGUAACCUAU-AAACU 5'

AT2G43200.1 1454 1473  
hypothetical protein

SRNA\_AG01\_SoLexa\_Mi2008\_1\_43556\_hit2

5' UGGUGGUGAUGGUUGUAGUAG  
||||||||| ||| |||||||  
ACCACCACCACCAUCAUCAUC 5'

AT2G43200.1 222 242  
hypothetical protein

SRNA\_AG01\_SoLexa\_Mi2008\_11\_14876\_hit4

5' GGAGG-UGGUGGUGGUGGU  
:|||| ||:|||||||||  
UCUCCUACUACCACCACCACCA 5'

AT2G43200.1 231 252  
hypothetical protein

SRNA\_AG01\_SoLexa\_Mi2008\_2\_10859\_hit1

5' CUCCAUCUCUCUC-UCUGCUU  
||||||||| ||| |||  
GAGGUAGAGAGAAGA-GAA 5'

AT2G44180.1 422 441  
methionine aminopeptidase-like protein

SRNA\_AG01\_SoLexa\_Mi2008\_4\_54658\_hit2

5' UUUCAAGAUUCCAGGCUUCAU  
: |||| |||||||  
GUAGUUGUAAGGUCCGAAGUUA 5'

AT2G44180.1 521 542  
methionine aminopeptidase-like protein

SRNA\_AG01\_SoLexa\_Mi2008\_1\_40813\_hit2

5' UGGAUUAUAAGAGCUGGGC-UGU  
||||| ||||||| | |||  
ACCUAAAUUCUCGACC-GAACA 5'

AT2G44240.1 268 288  
unknown protein

SRNA\_AG01\_SoLexa\_Mi2008\_1\_56092\_hit3

5' UUUGUGAUGAUGAUGAUGAUGA  
||| |||||||  
AAAGACUACUACUACUAAG 5'

AT2G44360.1 16 37  
unknown protein

SRNA\_AG01\_SoLexa\_Mi2008\_2\_15682\_hit2

5' GUCCUUUUGAUCAGUGA-UCA  
|:||||||||||||||| || |||  
CGGGAAAACUAGUC-CUCAGU 5'  
AT2G44730.1 1141 1160  
unknown protein

SRNA\_AG01\_SoLexa\_Mi2008\_1\_1776\_hit10

5' AGAAAAAAAAAAAAAAAAA-A-AAU  
||||| ||||||||||||| | |||  
UCUUUCUUUUUUUUUCUGUUA 5'  
AT2G45210.1 109 131  
putative auxin-regulated protein

SRNA\_AG01\_SoLexa\_Mi2008\_24\_21651\_hit2

5' UAGAGUGUGUCUUGGUAACCG  
||||||||||||||||||| |  
AUCUCACACAGAACCAUUCGA 5'  
AT2G45220.1 1030 1050  
pectinesterase like protein

SRNA\_AG01\_SoLexa\_Mi2008\_1\_17412\_hit1

5' UAACCUGAGGGAGGAUGCUAUU  
|||||||||||:||||| |||||  
AUUGGACUCCUCCUAAGAUAA 5'  
AT2G45380.2 468 489  
unknown protein

SRNA\_AG01\_SoLexa\_Mi2008\_1\_1219\_hit2

5' ACAAAAUCUGGUCAUGUGGUU  
||||||||||||||||||| |||  
UGUUUUAGACCAGUACA-CAA 5'  
AT2G45560.2 308 327  
cytochrome P450 like protein

SRNA\_AG01\_SoLexa\_Mi2008\_1\_27216\_hit1

5' UCAAGGGAAGCGUACUU-GUG  
||||||||||||||||||| ||| |||  
AGUCCCUUCGCA-GAACCAC 5'  
AT2G45560.2 366 385  
cytochrome P450 like protein

SRNA\_AG01\_SoLexa\_Mi2008\_1\_1219\_hit2

5' ACAAAAUCUGGUCAUGUGGUU  
||||||||||||||||||| |||  
UGUUUUAGACCAGUACA-CAA 5'  
AT2G45560.1 444 463  
cytochrome P450 like protein

SRNA\_AG01\_SoLexa\_Mi2008\_1\_27216\_hit1

5' UCAAGGGAAGCGUACUU-GUG  
||||||||||||||||||| ||| |||  
AGUCCCUUCGCA-GAACCAC 5'  
AT2G45560.1 502 521  
cytochrome P450 like protein

SRNA\_AG01\_SoLexa\_Mi2008\_6\_733\_hit1

5' AACUGUUCAUUAAGUAGAA  
|| ||||||||||||||||| ||  
UU-ACAAGUAAUUCU-CUA 5'

AT2G46680.2 811 827  
homeodomain transcription factor (ATHB-7)

SRNA\_AG01\_SoLexa\_Mi2008\_6\_733\_hit1

5' AACUGUUCAUUAAGUAGAA  
|| |||||  
UU-ACAAGUAAUUCA-CUA 5'

AT2G46680.1 817 833  
homeodomain transcription factor (ATHB-7)

SRNA\_AG01\_SoLexa\_Mi2008\_1\_13420\_hit2

5' GAAGAAGAAGAAGACUCUU  
:|||||  
UUUCUUCUUCUUC-GA-AA 5'

AT2G46710.1 107 123  
putative rac GTPase activating protein

SRNA\_AG01\_SoLexa\_Mi2008\_1\_4612\_hit91

5' CAAGACUUUUUGGUGGAUUU  
||| ||||:|||||  
AUUC-GAAAGAACCACCUAAA 5'

AT2G46710.1 1446 1465  
putative rac GTPase activating protein

SRNA\_AG01\_SoLexa\_Mi2008\_3\_51264\_hit6

5' UUGAUUGCGCAAGA-GCUUGUUAU  
||||||| || || |||||  
AACUAACGGGU-CUUCGAACAU 5'

AT2G47000.1 2273 2294  
putative ABC transporter

SRNA\_AG01\_SoLexa\_Mi2008\_1\_14208\_hit2

5' GAUCGAUAAA-CCUCUGCAUC  
||||| |||| ||||| |  
CUAGC-AUUUUGGAGACGUUG 5'

AT2G47000.1 3267 3286  
putative ABC transporter

SRNA\_AG01\_SoLexa\_Mi2008\_3\_8704\_hit1

5' CGAUCGAUAAA-CCUCUGCAU  
||||||| |||| |||||  
GCUAGC-AUUUUGGAGACGUU 5'

AT2G47000.1 3268 3287  
putative ABC transporter

SRNA\_AG01\_SoLexa\_Mi2008\_1\_3\_hit25

5' AAAAAAAAAAAAAAGA-AAGA  
||||||| |||||  
UUUUUUUUUUUUUCUAAUAC 5'

AT2G47130.1 903 922  
putative alcohol dehydrogenase

SRNA\_AG01\_SoLexa\_Mi2008\_1\_50059\_hit1

5' UUGAAGA-UGAUGACUCUGUUU  
| ||||| |||||  
ACCUUCUUACUACUGAGACAAA 5'

AT2G47360.1 190 211  
unknown protein

SRNA\_AG01\_SoLexa\_Mi2008\_1\_341\_hit1

5' AAAGAAACAGAGAGGAAGAU  
||||||| |||||:  
GUUCUUUGUCUCU-CUUCUG 5'

AT2G47360.1 210 228  
unknown protein

SRNA\_AG01\_SoLexa\_Mi2008\_1\_13420\_hit2

5' GAAGAAGAAGAAGACUCUU  
|||||  
CUUCUUCUUCUUCU-A-AA 5'

AT2G47450.1 182 198  
CAO chloroplast signal recognition particle chromo protein

SRNA\_AG01\_SoLexa\_Mi2008\_3\_53795\_hit2

5' UUGUUG-CCGUUGGGGAAGAAU  
||||| || ||||| |||||  
AACAAACAGGAAACCC-UUCUUA 5'

AT2G47470.4 743 763  
putative protein disulfide-isomerase

SRNA\_AG01\_SoLexa\_Mi2008\_7\_15838\_hit1

5' GUGAAGAUGAAGAAUAAUGUU  
|| |||||:|||||  
CA-UUCUACUUCUUGUUACAA 5'

AT2G47510.2 1680 1699  
putative fumarase

SRNA\_AG01\_SoLexa\_Mi2008\_7\_15838\_hit1

5' GUGAAGAUGAAGAAUAAUGUU  
|| |||||:|||||  
CA-UUCUACUUCUUGUUACAA 5'

AT2G47510.1 1736 1755  
putative fumarase

SRNA\_AG01\_SoLexa\_Mi2008\_1\_41846\_hit1

5' UGG-GAGCUGAGAGAA-ACGUCG  
||| ||||| ||| ||  
ACCUCUCGACUCUCUUCUGCUGC 5'

AT2G47510.2 40 62  
putative fumarase

SRNA\_AG01\_SoLexa\_Mi2008\_1\_41846\_hit1

5' UGG-GAGCUGAGAGAA-ACGUCG  
||| ||||| ||| ||  
ACCUCUCGACUCUCUUCUGCUGC 5'

AT2G47510.1 84 106  
putative fumarase

SRNA\_AG01\_SoLexa\_Mi2008\_6\_44397\_hit1

5' UGUUUGG-GCCACAUAGGUGGG  
|||| || ||||| |||||  
ACAU-CCUCGGUGUCUCCACCC 5'

AT2G47770.1 489 509  
unknown protein

SRNA\_AG01\_SoLexa\_Mi2008\_8\_2829\_hit1

5' AUCCAUGGUCCUCAGAGAGUC  
|||||:||||| |||  
GAGGUACUAGGAGUCU-UCAG 5'

AT2G47880.1 71 90  
putative glutaredoxin

SRNA\_AG01\_SoLexa\_Mi2008\_1\_21766\_hit2

5' UAGAUCUGAC-AAUCAUUUUGA  
||| ||| || |||||  
AUC-AGAGUGGUUAGUAAAACU 5'

AT2G48160.1 2423 2443

SRNA\_AG01\_SoLexa\_Mi2008\_1\_40978\_hit1

5' UGGAUGUGGAUGAUGGUAUGAG  
 |||||:||||| || |||||  
 ACCUACACCUACU-CC-UACUC 5'  
 AT2G48160.1 3926 3945

SRNA\_AG01\_SoLexa\_Mi2008\_1\_83\_hit1

5' AAAAAAUGCAAAGUA-AUCCUA  
 |||||:||||| || |||||  
 UUUUUUAUGUUUCAUAUA-GAU 5'  
 AT3G01290.1 1069 1089  
 unknown protein

SRNA\_AG01\_SoLexa\_Mi2008\_1\_46644\_hit28

5' UUAAGUACUUUUUCGGGCAUUU  
 |||||:||||| || |||||  
 AAUUCAUGAAAAA-C-CUAAAA 5'  
 AT3G01290.1 133 152  
 unknown protein

SRNA\_AG01\_SoLexa\_Mi2008\_1\_3384\_hit1

5' AUGGUGAAGAUGU-UUC-UAGU  
 |||||:||||| || |||||  
 UACCACUUCUACAGAAGCAUGA 5'  
 AT3G01420.1 291 312  
 feebly like protein

SRNA\_AG01\_SoLexa\_Mi2008\_1\_37225\_hit4

5' UGAUGAUGAUGAUGAUGAAGAAG  
 |||||:||||| |||||:|||||  
 CCUACUGCUACUUCUACUUCUUC 5'  
 AT3G01830.1 614 636  
 unknown protein

SRNA\_AG01\_SoLexa\_Mi2008\_6\_33450\_hit2

5' UCUGAUGGUGUGCAUCCCAAU  
 |||||:||||| |||||:  
 AGACUACCACAC-UCGGGUUG 5'  
 AT3G01970.1 737 756  
 putative WRKY-like transcriptional regulator protein

SRNA\_AG01\_SoLexa\_Mi2008\_1\_3901\_hit3

5' CAAAACGAAGAAGAU-GAUGAG  
 ||||| ||||| |||||  
 GUUUUGCCUCUUCUACUACUA 5'  
 AT3G02230.1 1190 1211  
 reversibly glycosylated polypeptide-1

SRNA\_AG01\_SoLexa\_Mi2008\_1\_14378\_hit1

5' GAUUCUUGUCUUGAUU-UUGUU  
 |||||:||||| || |||||  
 CUAAGAACAGAGC-AACAACA 5'  
 AT3G02650.1 963 983  
 hypothetical protein

SRNA\_AG01\_SoLexa\_Mi2008\_17\_6989\_hit1

5' CAUC-AGAAGAAUCAUAGUCCGC  
 |||| ||| ||||| |||||  
 GUAGAUCU-CUUAGUACAGGCG 5'  
 AT3G02870.2 167 188  
 myo-inositol monophosphatase like protein

leaves\_1sup\_AG01\_SoLexa\_Mi\_Cell\_2008\_hit\_target\_site.txt

SRNA\_AG01\_SoLexa\_Mi2008\_1\_30071\_hit1

5' UCCGUCUGCGGUGGUCGGAUU  
|||||  
AGGCAGACGCCACCAGGCUAA 5'  
AT3G03450.1 1086 1106  
RGA1-like protein

SRNA\_AG01\_SoLexa\_Mi2008\_1\_55233\_hit1

5' UUUGAGUAUUCGGGUCGGUAUU  
||| || |||||  
AAAGUC-UAAGCCCAGCCCA-AA 5'  
AT3G03450.1 1233 1253  
RGA1-like protein

SRNA\_AG01\_SoLexa\_Mi2008\_1\_6039\_hit2

5' CAGAGAGUCUGAUUCAAGAACA  
||||| ||| |||  
GUCUCUCAGACUAUACUUC-UGU 5'  
AT3G03910.1 12 33  
putative glutamate dehydrogenase

SRNA\_AG01\_SoLexa\_Mi2008\_2\_13276\_hit1

5' CUUUUCUCGAGCCUGUGAGUC  
||||| | |||||  
GAAAAGAGCUCGAA-ACUCAG 5'  
AT3G03910.1 132 151  
putative glutamate dehydrogenase

SRNA\_AG01\_SoLexa\_Mi2008\_1\_51028\_hit2

5' UUGAUCAAUGGGUUUUGCA-UG  
||||| ||| |||  
AACUAGUUACCCAAAAGGUCAC 5'  
AT3G03910.1 575 596  
putative glutamate dehydrogenase

SRNA\_AG01\_SoLexa\_Mi2008\_1\_48488\_hit1

5' UUCAACUGCGGUAACAUCAGAU  
:||||| ||| |||  
GAGUUGACGCCAUUGAAGACUA 5'  
AT3G04070.2 932 953  
NAM-like protein (no apical meristem)

SRNA\_AG01\_SoLexa\_Mi2008\_1\_48488\_hit1

5' UUCAACUGCGGUAACAUCAGAU  
:||||| ||| |||  
GAGUUGACGCCAUUGAAGACUA 5'  
AT3G04070.1 980 1001  
NAM-like protein (no apical meristem)

SRNA\_AG01\_SoLexa\_Mi2008\_1\_8652\_hit2

5' CGAGUGAGUUAGGUGAG-GA  
||||| ||||| |||  
ACUCACUCUAUCCACUCACU 5'  
AT3G04120.1 47 66  
glyceraldehyde-3-phosphate dehydrogenase C subunit (GapC)

SRNA\_AG01\_SoLexa\_Mi2008\_1\_47577\_hit5

5' UUAGCCAGUGAUUGUGUGGAC  
:|||| ||||| |||||  
GAUCG-UCACUAACUCACCUG 5'  
AT3G04120.1 671 690  
glyceraldehyde-3-phosphate dehydrogenase C subunit (GapC)



leaves\_1sup\_AG01\_SoLexa\_Mi\_Cell\_2008\_hit\_target\_site.txt

SRNA\_AG01\_SoLexa\_Mi2008\_1\_1014\_hit1

5' AAU-AGCCAAGGAUGACUUGCCUG  
||| |||||:||||| |||||  
UUACUCGGUUUCUACUAAACGGAC 5'  
AT3G05690.1 1183 1206  
putative transcription factor

SRNA\_AG01\_SoLexa\_Mi2008\_1\_13905\_hit1

5' GAGAAGAGAAU-AGGUGGUA  
||||| ||||| ||| |||  
CUCUUCUCUUUACUCC-CCAA 5'  
AT3G06190.2 136 155  
unknown protein

SRNA\_AG01\_SoLexa\_Mi2008\_1\_44627\_hit1

5' UGUCCCUCGACUUCAGACC  
||||| ||| |||||  
ACAGGGAGACGUAAAGUCUGG 5'  
AT3G06455.1 1339 1359

SRNA\_AG01\_SoLexa\_Mi2008\_2\_10859\_hit1

5' CUC-CAUCUCUCUCUGCUU  
||| | |||||  
GAGAG-AGAGAGAGACGAA 5'  
AT3G06455.1 218 237

SRNA\_AG01\_SoLexa\_Mi2008\_1\_1889\_hit1

5' AGAGAGAGAGAUGAAUGUGGU  
||||| ||| |||  
UCUCUCUCUAC-UAC-CCC 5'  
AT3G07565.1 42 60  
unknown protein

SRNA\_AG01\_SoLexa\_Mi2008\_1\_5280\_hit1

5' CACAAGAUUUGUACAUUAC  
||||| ||||| ||| |||  
GUGUUCUUAUAAAC-UGUA-AG 5'  
AT3G07565.1 791 808  
unknown protein

SRNA\_AG01\_SoLexa\_Mi2008\_1\_5280\_hit1

5' CACAAGAUUUGUACAUUAC  
||||| ||||| ||| |||  
GUGUUCUUAUAAAC-UGUA-AG 5'  
AT3G07565.3 796 813  
unknown protein

SRNA\_AG01\_SoLexa\_Mi2008\_1\_5280\_hit1

5' CACAAGAUUUGUACAUUAC  
||||| ||||| ||| |||  
GUGUUCUUAUAAAC-UGUA-AG 5'  
AT3G07565.2 883 900  
unknown protein

SRNA\_AG01\_SoLexa\_Mi2008\_1\_37779\_hit1

5' UGCAAGAGUUUCAGAUAGAU  
||||| |||||  
ACGUUCUCAAAGUGGACAUCUA 5'  
AT3G07660.1 1163 1184  
unknown protein

SRNA\_AG01\_SoLexa\_Mi2008\_1\_36861\_hit1

leaves\_1sup\_AG01\_SoLexa\_Mi\_Cell\_2008\_hit\_target\_site.txt

5' UGAGUUACCAGUGGUGGUGGA  
|||||  
ACUCAUUGGUCACCACCACCU 5'  
AT3G07660.1 1964 1984  
unknown protein

SRNA\_AG01\_SoLexa\_Mi2008\_1\_13510\_hit1  
5' GAA-GGGGAGAAGUAUAACAUA  
||| |||||  
CUUACCCCUUUAUAG-GUAU 5'  
AT3G07660.1 2092 2112  
unknown protein

SRNA\_AG01\_SoLexa\_Mi2008\_1\_53148\_hit10  
5' UUGGUUA-GUAUUGGUGAAUUGUA  
||| ||| ||||| |||||  
AACGAAUUAUAACCACGUAACAU 5'  
AT3G07660.1 2127 2150  
unknown protein

SRNA\_AG01\_SoLexa\_Mi2008\_1\_16916\_hit1  
5' UAAAGU-AC-UGUUGCCCAUGGUC  
||||| || |||||  
AUUUCAGUGCACAACGGGUACCAC 5'  
AT3G07660.1 2500 2523  
unknown protein

SRNA\_AG01\_SoLexa\_Mi2008\_1\_15033\_hit11  
5' GGCCUUG-CCCGGAUGGUAC  
|:||||| |||||  
CUGGAACAGGGCCUACCAUG 5'  
AT3G07660.1 2562 2581  
unknown protein

SRNA\_AG01\_SoLexa\_Mi2008\_30\_5875\_hit1  
5' CAGAAAAGGAUGGACGAAGGA  
||||| ||||| |||  
GUCUUCUCCUACCUGC-UCCC 5'  
AT3G07660.1 852 871  
unknown protein

SRNA\_AG01\_SoLexa\_Mi2008\_1\_3\_hit25  
5' AAA-A-AAAAAAAAAGAAAGA  
||| | |||||  
UUUAUCUUUUUUUUUCUUUCG 5'  
AT3G07810.2 1975 1995  
putative RNA-binding protein

SRNA\_AG01\_SoLexa\_Mi2008\_1\_3\_hit25  
5' AAA-A-AAAAAAAAAGAAAGA  
||| | |||||  
UUUAUCUUUUUUUUUCUUUCG 5'  
AT3G07810.1 2042 2062  
putative RNA-binding protein

SRNA\_AG01\_SoLexa\_Mi2008\_1\_23335\_hit2  
5' UAGGUAAUGAUUGAGGAGGCC  
|||| ||||| |||||  
AUCC-UUACUUACUCCUCCGG 5'  
AT3G08720.1 1655 1674  
putative ribosomal-protein S6 kinase (ATPK19)

SRNA\_AG01\_SoLexa\_Mi2008\_1\_23335\_hit2

leaves\_1sup\_AG01\_SoLexa\_Mi\_Cell\_2008\_hit\_target\_site.txt

5' UAGGUAUUGAUUGAGGAGGCC  
||||| ||||| |||||  
AUCU-UUACUUACUCCUCCGG 5'  
AT3G08720.2 1843 1862  
putative ribosomal-protein S6 kinase (ATPK19)

SRNA\_AG01\_SoLexa\_Mi2008\_1\_23007\_hit1  
5' UAGGGAAA-GUCAGACAACUGCAU  
||||||| |||||:|||  
AUCCUUUACAGUCUGUUGAUGUA 5'  
AT3G09010.1 1635 1658  
putative receptor ser/thr protein kinase

SRNA\_AG01\_SoLexa\_Mi2008\_1\_10886\_hit7  
5' CUC-CCUUGAUUACACGGUGAC  
||| ||||| |||||  
GAGCGGAACUACAGUGCCACUU 5'  
AT3G09010.1 838 859  
putative receptor ser/thr protein kinase

SRNA\_AG01\_SoLexa\_Mi2008\_2\_14955\_hit1  
5' GGCAGC-AGCUGAAGCAAGAGCA  
||||| | ||||| |||  
CCGUCGAU-GACUUCGUUGUCGU 5'  
AT3G09200.2 826 847  
putative 60S acidic ribosomal protein P0

SRNA\_AG01\_SoLexa\_Mi2008\_2\_14955\_hit1  
5' GGCAGC-AGCUGAAGCAAGAGCA  
||||| | ||||| |||  
CCGUCGAU-GACUUCGUUGUCGU 5'  
AT3G09200.1 925 946  
putative 60S acidic ribosomal protein P0

SRNA\_AG01\_SoLexa\_Mi2008\_6\_1651\_hit1  
5' ACGGUCAGGAACAAAAGCA  
| ||||| |||||  
UACCAGUCCUCGUUUUCGU 5'  
AT3G09260.1 82 100  
thioglucosidase 3D precursor

SRNA\_AG01\_SoLexa\_Mi2008\_7\_14062\_hit1  
5' GAGGAGGAGGAGGU-GA-ACA  
||||||| || |||  
CUCCUCCUCCUCCACCUAUGA 5'  
AT3G09520.1 56 76  
hypothetical protein

SRNA\_AG01\_SoLexa\_Mi2008\_1\_18666\_hit1  
5' UAAUCAGAGAGAGAAAGAGGAU  
||| |||||  
CUUACUCUCUCUUCUCCUC 5'  
AT3G09780.1 32 53  
putative protein kinase

SRNA\_AG01\_SoLexa\_Mi2008\_3\_40895\_hit1  
5' UGGAUGA-UGAGAGAGAGAU  
|||| | |||||  
ACCU-CUUACUCUCUCUU 5'  
AT3G09780.1 40 58  
putative protein kinase

SRNA\_AG01\_SoLexa\_Mi2008\_3\_13907\_hit1

leaves\_1sup\_AG01\_SoLexa\_Mi\_Cell\_2008\_hit\_target\_site.txt

5' GAGAAGAGAUAGA-AUAGAAU  
| | | | | | | | | | | | | | | | |  
AUCUUCUCUAUCUCUAUCUAA 5'  
AT3G09860.1 443 463  
unknown protein

SRNA\_AG01\_SoLexa\_Mi2008\_13\_13906\_hit2  
5' GAGAAGAGAUAGA-AUAGAA  
| | | | | | | | | | | | | | | | |  
AUCUUCUCUAUCUCUAUCUA 5'  
AT3G09860.1 444 463  
unknown protein

SRNA\_AG01\_SoLexa\_Mi2008\_1\_35784\_hit2  
5' UGAGAAGAGAUAGA-AUAGA  
| | | | | | | | | | | | | | | | |  
CAUCUUCUCUAUCUCUAUCU 5'  
AT3G09860.1 445 464  
unknown protein

SRNA\_AG01\_SoLexa\_Mi2008\_1\_2\_hit38  
5' AAAAAAAAAAAAAAAAAACCAU  
| | | | | | | | | | | | | | | | |  
UUUUUUUUUUUUUUUGUUA 5'  
AT3G10300.4 1119 1137  
unknown protein

SRNA\_AG01\_SoLexa\_Mi2008\_1\_2\_hit38  
5' AAAAAAAAAAAAAAAAAACCAU  
| | | | | | | | | | | | | | | | |  
UUUUUUUUUUUUUUUGUUA 5'  
AT3G10300.3 1126 1144  
unknown protein

SRNA\_AG01\_SoLexa\_Mi2008\_1\_2\_hit38  
5' AAAAAAAAAAAAAAAAAACCAU  
| | | | | | | | | | | | | | | | |  
UUUUUUUUUUUUUUUGUUA 5'  
AT3G10300.2 1339 1357  
unknown protein

SRNA\_AG01\_SoLexa\_Mi2008\_17\_7551\_hit1  
5' CCAAAAAGGAAAGACGCU-GAU  
| | | | | | | | | | | | | | | | |  
GGUUUUUCCUUCUG-GAUCUU 5'  
AT3G10300.1 799 820  
unknown protein

SRNA\_AG01\_SoLexa\_Mi2008\_1\_11370\_hit1  
5' CUGAAGCCGAGUGAUG-UGAC  
| | | | | | | | | | | | | | | | |  
UACUUCUGCUCACUACCACUG 5'  
AT3G10500.1 42 62  
unknown protein

SRNA\_AG01\_SoLexa\_Mi2008\_7\_44312\_hit1  
5' UGUAGUGAUGAUUGUGUCUAG  
| | | | | | | | | | | | | | | | |  
CCAUCA-U-CUACACAGAUC 5'  
AT3G10720.2 1696 1714  
pectinesterase like protein

SRNA\_AG01\_SoLexa\_Mi2008\_1\_10249\_hit2

leaves\_1sup\_AG01\_SoLexa\_Mi\_Cell\_2008\_hit\_target\_site.txt

5' CUA-GGCAAAGCUUAGAGGUC  
||| |||||  
GAUGCCGUUUCGAAUC-CCAU 5'  
AT3G10720.2 295 314  
pectinesterase like protein

SRNA\_AG01\_SoLexa\_Mi2008\_7\_44312\_hit1  
5' UGUAGUGAUGAUUGUGUCUAG  
||| | |||||  
CCAUCA-U-CUAACACAGAUC 5'  
AT3G10720.1 895 913  
pectinesterase like protein

SRNA\_AG01\_SoLexa\_Mi2008\_1\_3\_hit25  
5' AAAA-AA-AAAAAAGAAAGA  
||| | |||||  
UUUUCUUGUUUUUUUCUUUCU 5'  
AT3G10930.1 406 426  
unknown protein

SRNA\_AG01\_SoLexa\_Mi2008\_1\_3188\_hit1  
5' AU-GCUCUAAGUCUUGAUCGU  
|| | |||||:|  
UAUC-AGAUUCAGAACUAGUA 5'  
AT3G10930.1 544 563  
unknown protein

SRNA\_AG01\_SoLexa\_Mi2008\_1\_43410\_hit1  
5' UGGUGCACAGAUUUGACGUCGC  
||| | |||||  
ACCACGUGUCUAAACUGCAGCG 5'  
AT3G10985.1 168 189  
unknown protein

SRNA\_AG01\_SoLexa\_Mi2008\_7\_353\_hit2  
5' AAAGAAGAAGAUAAAGC-AU  
||| | |||||  
GUUCUUCUUCUACUUCGCUA 5'  
AT3G10985.1 17 36  
unknown protein

SRNA\_AG01\_SoLexa\_Mi2008\_1\_173\_hit2  
5' AA-AAGAAGAAGAUAAAGC-AU  
|| | |||||  
UUCUUCUUCUUCUACUUCGCUA 5'  
AT3G10985.1 17 38  
unknown protein

SRNA\_AG01\_SoLexa\_Mi2008\_1\_172\_hit2  
5' AA-AAGAAGAAGAUAAAGCA  
|| | |||||  
UUCUUCUUCUUCUACUUCGCG 5'  
AT3G10985.1 19 38  
unknown protein

SRNA\_AG01\_SoLexa\_Mi2008\_1\_22224\_hit1  
5' UAGCCCCAGAAGCCCACACCG  
||| | |||||  
AUCGGGUCUUCGGGUGUGGC 5'  
AT3G10985.1 707 727  
unknown protein

SRNA\_AG01\_SoLexa\_Mi2008\_1\_2\_hit38

5' AAAAAAAAAAAAAAAAAACCAU  
|||||  
UUUUUUUUUUUUUUUUGAUC 5'  
AT3G10985.1 747 765  
unknown protein

SRNA\_AG01\_SoLexa\_Mi2008\_1\_26697\_hit1  
5' UCAAA-GAGGGAAAUUGGAUGAG  
|||||  
UGUUUACUCCCUUAACCUUCUC 5'  
AT3G11340.1 170 192  
hypothetical protein

SRNA\_AG01\_SoLexa\_Mi2008\_3\_37720\_hit1  
5' UGCAACACACUUGG-AUACGAGG  
|||||  
ACGUUGUGUGAACCUUA-ACUCC 5'  
AT3G11340.1 263 284  
hypothetical protein

SRNA\_AG01\_SoLexa\_Mi2008\_38\_14830\_hit2  
5' GGACUGAAGGGAGCUCCCU  
|||  
CCUUACUCCCUUGAGGUC 5'  
AT3G11440.1 1153 1171  
transcription factor like protein (MYB65)

SRNA\_AG01\_SoLexa\_Mi2008\_19\_40112\_hit2  
5' UGGACUGAAGGGAGCUCCCU  
|||||  
ACCUUACUCCCUUGAGGUC 5'  
AT3G11440.1 1153 1172  
transcription factor like protein (MYB65)

SRNA\_AG01\_SoLexa\_Mi2008\_705\_52065\_hit2  
5' UUGGACUGAAGGGAGCUCCCU  
|||||  
AACCUUACUCCCUUGAGGUC 5'  
AT3G11440.1 1153 1173  
transcription factor like protein (MYB65)

SRNA\_AG01\_SoLexa\_Mi2008\_16\_52069\_hit1  
5' UUGGACUGAAGGGAGCUCCCU  
|||||  
AACCUUACUCCCUUGAGGUC 5'  
AT3G11440.1 1153 1173  
transcription factor like protein (MYB65)

SRNA\_AG01\_SoLexa\_Mi2008\_7\_3717\_hit1  
5' AUUGGACUGAAGGGAGCUCCCU  
|||||  
UAACCUUACUCCCUUGAGGUC 5'  
AT3G11440.1 1153 1174  
transcription factor like protein (MYB65)

SRNA\_AG01\_SoLexa\_Mi2008\_3349\_41018\_hit1  
5' UGGAUUGAAGGGAGCUCUA  
|||||  
ACCUUACUCCCUUGAGGU 5'  
AT3G11440.1 1154 1172  
transcription factor like protein (MYB65)

SRNA\_AG01\_SoLexa\_Mi2008\_1621\_41020\_hit1

leaves\_1sup\_AG01\_SoLexa\_Mi\_Cell\_2008\_hit\_target\_site.txt

5' UGGAUUGAAGGGAGCUCUU  
||||| |||||||||:  
ACCUUACUUCCCUCGAGGU 5'  
AT3G11440.1 1154 1172  
transcription factor like protein (MYB65)

SRNA\_AG01\_SoLexa\_Mi2008\_24\_52064\_hit2  
5' UUGGACUGAAGGGAGCUCUU  
||||| |||||||||:  
AACCUUACUUCCCUCGAGGU 5'  
AT3G11440.1 1154 1173  
transcription factor like protein (MYB65)

SRNA\_AG01\_SoLexa\_Mi2008\_7\_52068\_hit1  
5' UUGGACUGAAGGGAGCUCUU  
||||| |||||||||:  
AACCUUACUUCCCUCGAGGU 5'  
AT3G11440.1 1154 1173  
transcription factor like protein (MYB65)

SRNA\_AG01\_SoLexa\_Mi2008\_1\_52243\_hit1  
5' UUGGAUUGAAGGGAGCUCUU  
||||| |||||||||:  
AACCUUACUUCCCUCGAGGU 5'  
AT3G11440.1 1154 1173  
transcription factor like protein (MYB65)

SRNA\_AG01\_SoLexa\_Mi2008\_3416\_52245\_hit1  
5' UUGGAUUGAAGGGAGCUCUA  
||||| |||||||||:|  
AACCUUACUUCCCUCGAGGU 5'  
AT3G11440.1 1154 1173  
transcription factor like protein (MYB65)

SRNA\_AG01\_SoLexa\_Mi2008\_870\_52246\_hit1  
5' UUGGAUUGAAGGGAGCUCUU  
||||| |||||||||:  
AACCUUACUUCCCUCGAGGU 5'  
AT3G11440.1 1154 1173  
transcription factor like protein (MYB65)

SRNA\_AG01\_SoLexa\_Mi2008\_1\_3716\_hit1  
5' AUUGGACUGAAGGGAGCUCUU  
||||| |||||||||:  
UAACCUUACUUCCCUCGAGGU 5'  
AT3G11440.1 1154 1174  
transcription factor like protein (MYB65)

SRNA\_AG01\_SoLexa\_Mi2008\_21\_12906\_hit1  
5' CUUGGACUGAAGGGAGCUCUU  
||||| |||||||||:  
UAACCUUACUUCCCUCGAGGU 5'  
AT3G11440.1 1154 1174  
transcription factor like protein (MYB65)

SRNA\_AG01\_SoLexa\_Mi2008\_61\_55550\_hit1  
5' UUUGGACUGAAGGGAGCUCUU  
||||| |||||||||:  
UAACCUUACUUCCCUCGAGGU 5'  
AT3G11440.1 1154 1174  
transcription factor like protein (MYB65)

SRNA\_AG01\_SoLexa\_Mi2008\_14\_55632\_hit1

leaves\_1sup\_AG01\_SoLexa\_Mi\_Cell\_2008\_hit\_target\_site.txt

5' UUUGGAUUGAAGGGAGCUCCU  
||||| |||||||||  
UAACCUUACUCCUCGAGGU 5'  
AT3G11440.1 1154 1174  
transcription factor like protein (MYB65)

SRNA\_AG01\_SoLexa\_Mi2008\_15\_52063\_hit3  
5' UUGGACUGAAGGGAGCUCC  
||||| |||||||||  
AACCUUACUCCUCGAGG 5'  
AT3G11440.1 1155 1173  
transcription factor like protein (MYB65)

SRNA\_AG01\_SoLexa\_Mi2008\_52\_52244\_hit2  
5' UUGGAUUGAAGGGAGCUCU  
||||| |||||||||:  
AACCUUACUCCUCGAGG 5'  
AT3G11440.1 1155 1173  
transcription factor like protein (MYB65)

SRNA\_AG01\_SoLexa\_Mi2008\_9\_55631\_hit1  
5' UUUGGAUUGAAGGGAGCUCC  
||||| |||||||||  
UAACCUUACUCCUCGAGG 5'  
AT3G11440.1 1155 1174  
transcription factor like protein (MYB65)

SRNA\_AG01\_SoLexa\_Mi2008\_1201\_55633\_hit2  
5' UUUGGAUUGAAGGGAGCUCU  
||||| |||||||||:  
UAACCUUACUCCUCGAGG 5'  
AT3G11440.1 1155 1174  
transcription factor like protein (MYB65)

SRNA\_AG01\_SoLexa\_Mi2008\_136\_14386\_hit1  
5' GAUUGGACUGAAGGGAGCUCC  
||||| |||||||||  
AUAACCUUACUCCUCGAGG 5'  
AT3G11440.1 1155 1175  
transcription factor like protein (MYB65)

SRNA\_AG01\_SoLexa\_Mi2008\_3\_55549\_hit1  
5' UUUGGACUGAAGGGAGCUC  
||||| |||||||||  
UAACCUUACUCCUCGAG 5'  
AT3G11440.1 1156 1174  
transcription factor like protein (MYB65)

SRNA\_AG01\_SoLexa\_Mi2008\_907\_55630\_hit3  
5' UUUGGAUUGAAGGGAGCUC  
||||| |||||||||  
UAACCUUACUCCUCGAG 5'  
AT3G11440.1 1156 1174  
transcription factor like protein (MYB65)

SRNA\_AG01\_SoLexa\_Mi2008\_4\_13220\_hit2  
5' CUUUGGAUUGAAGGGAGCUC  
||||| |||||||||  
AUAACCUUACUCCUCGAG 5'  
AT3G11440.1 1156 1175  
transcription factor like protein (MYB65)

SRNA\_AG01\_SoLexa\_Mi2008\_1\_14385\_hit1

leaves\_1sup\_AG01\_SoLexa\_Mi\_Cell\_2008\_hit\_target\_site.txt

5' GAUUGGACUGAAGGGAGCUC  
||||| |||||||||  
AUAACCUUACUCCUCGAG 5'  
AT3G11440.1 1156 1175  
transcription factor like protein (MYB65)

SRNA\_AG01\_SoLexa\_Mi2008\_5\_13219\_hit2  
5' CUUUGGAUUGAAGGGAGCUC  
||||| |||||||||  
AUAACCUUACUCCUCGA 5'  
AT3G11440.1 1157 1175  
transcription factor like protein (MYB65)

SRNA\_AG01\_SoLexa\_Mi2008\_1\_34009\_hit1  
5' UCUUUC-AGGUUGUUGAAAGU  
||||| | ||||||||| |  
AGAAACGCUCCAACAACUUUGA 5'  
AT3G11540.2 1789 1810  
spindly (gibberellin signal transduction protein)

SRNA\_AG01\_SoLexa\_Mi2008\_1\_34009\_hit1  
5' UCUUUC-AGGUUGUUGAAAGU  
||||| | ||||||||| |  
AGAAACGCUCCAACAACUUUGA 5'  
AT3G11540.1 2610 2631  
spindly (gibberellin signal transduction protein)

SRNA\_AG01\_SoLexa\_Mi2008\_2\_13419\_hit2  
5' GAAGAAGAAGAAGACACUU  
||||||| ||| |||  
CUUCUUCUCCUCU-UGAA 5'  
AT3G11720.1 1287 1304  
unknown protein

SRNA\_AG01\_SoLexa\_Mi2008\_2\_13419\_hit2  
5' GAAGAAGAAGAAGACACUU  
||||||| ||| |||  
CUUCUUCUCCUCU-UGAA 5'  
AT3G11720.2 1336 1353  
unknown protein

SRNA\_AG01\_SoLexa\_Mi2008\_1\_1510\_hit1  
5' ACCACCACCAG-CGCCGC  
||||||| || | |||||  
UGGUGGUGGCGG-CGGCGCGG 5'  
AT3G11820.2 1104 1124  
syntaxin like protein

SRNA\_AG01\_SoLexa\_Mi2008\_2\_5441\_hit1  
5' CACCACCACCAG-CGCCGC  
||||||| || | |||||  
GUGGUGGUGGCGG-CGGCGCGG 5'  
AT3G11820.2 1105 1125  
syntaxin like protein

SRNA\_AG01\_SoLexa\_Mi2008\_1\_1510\_hit1  
5' ACCACCACCAG-CGCCGC  
||||||| || | |||||  
UGGUGGUGGUGG-CGGCGCGG 5'  
AT3G11820.2 1107 1127  
syntaxin like protein

SRNA\_AG01\_SoLexa\_Mi2008\_2\_5441\_hit1

leaves\_1sup\_AG01\_SoLexa\_Mi\_Cell\_2008\_hit\_target\_site.txt

5' CACCACCACCACCAG-CGCCGC  
|||||  
GUGGUGGUGGUGG-CGGCGGCG 5'  
AT3G11820.2 1108 1128  
syntaxin like protein

SRNA\_AG01\_SoLexa\_Mi2008\_1\_1510\_hit1  
5' ACCACCACCACCAGCGCCGC  
|||||  
GGGUGGUGGUGGUGGCGGCGG 5'  
AT3G11820.2 1109 1129  
syntaxin like protein

SRNA\_AG01\_SoLexa\_Mi2008\_2\_5441\_hit1  
5' CACCACCACCACCAGCGCCGC  
| |||||  
GGGGUGGUGGUGGUGGCGGCGG 5'  
AT3G11820.2 1110 1130  
syntaxin like protein

SRNA\_AG01\_SoLexa\_Mi2008\_1\_36082\_hit1  
5' UGAGCAUUUGGUGGUGUACCC  
: ||| |||||  
GCUCCUAAACCACCACA-GGG 5'  
AT3G11820.2 1161 1180  
syntaxin like protein

SRNA\_AG01\_SoLexa\_Mi2008\_1\_36083\_hit1  
5' UGAGCAUUUGGUGGUGUACCC  
: ||| |||||  
GCUCCUAAACCACCAC-AGGG 5'  
AT3G11820.2 1161 1180  
syntaxin like protein

SRNA\_AG01\_SoLexa\_Mi2008\_3\_40409\_hit2  
5' UGGAGCAUUUGGUGGUGUACCC  
||||| |||||  
ACCUCCUAAACCACCACA-GGG 5'  
AT3G11820.2 1161 1181  
syntaxin like protein

SRNA\_AG01\_SoLexa\_Mi2008\_1\_1510\_hit1  
5' ACCACCACCACCAG-CGCCGC  
||||| || |||||  
UGGUGGUGGCGG-CGGCGGCGG 5'  
AT3G11820.1 1188 1208  
syntaxin like protein

SRNA\_AG01\_SoLexa\_Mi2008\_2\_5441\_hit1  
5' CACCACCACCACCAG-CGCCGC  
||||| || |||||  
GUGGUGGUGGCGG-CGGCGGCGG 5'  
AT3G11820.1 1189 1209  
syntaxin like protein

SRNA\_AG01\_SoLexa\_Mi2008\_1\_1510\_hit1  
5' ACCACCACCACCAGC-GCCGCC  
||||| || |||||  
UGGUGGUGGUGG-CGGCGGCGG 5'  
AT3G11820.1 1191 1211  
syntaxin like protein

SRNA\_AG01\_SoLexa\_Mi2008\_2\_5441\_hit1

leaves\_1sup\_AG01\_SoLexa\_Mi\_Cell\_2008\_hit\_target\_site.txt

5' CACCACCACCACCAG-CGCCGC  
|||||  
GUGGUGGUGGUGG-CGGCGGCG 5'  
AT3G11820.1 1192 1212  
syntaxin like protein

SRNA\_AG01\_SoLexa\_Mi2008\_1\_1510\_hit1  
5' ACCACCACCACCAGCGCCGCC  
|||||  
GGGUGGUGGUGGUGGCGGCGG 5'  
AT3G11820.1 1193 1213  
syntaxin like protein

SRNA\_AG01\_SoLexa\_Mi2008\_2\_5441\_hit1  
5' CACCACCACCACCAGCGCCGC  
| |||||  
GGGGUGGUGGUGGUGGCGGCGG 5'  
AT3G11820.1 1194 1214  
syntaxin like protein

SRNA\_AG01\_SoLexa\_Mi2008\_1\_36082\_hit1  
5' UGAGCAUUUGGUGGUGUACCC  
: ||| |||||  
GCUCCUAAACCACCACA-GGG 5'  
AT3G11820.1 1245 1264  
syntaxin like protein

SRNA\_AG01\_SoLexa\_Mi2008\_1\_36083\_hit1  
5' UGAGCAUUUGGUGGUGUACCC  
: ||| |||||  
GCUCCUAAACCACCAC-AGGG 5'  
AT3G11820.1 1245 1264  
syntaxin like protein

SRNA\_AG01\_SoLexa\_Mi2008\_3\_40409\_hit2  
5' UGGAGCAUUUGGUGGUGUACCC  
||||| |||||  
ACCUCCUAAACCACCACA-GGG 5'  
AT3G11820.1 1245 1265  
syntaxin like protein

SRNA\_AG01\_SoLexa\_Mi2008\_3\_24107\_hit2  
5' UAGUUGAACCUUGGGAUGGGUC  
|||| |||| |||||  
AUCA-CUUGUAACCCUA-CCAG 5'  
AT3G11910.1 297 316  
ubiquitin carboxyl-terminal hydrolase like protein

SRNA\_AG01\_SoLexa\_Mi2008\_2\_15140\_hit2  
5' GGGAAAAGUUUGUAGAGAA  
: |||||: |||||  
UACUUUUCAAACGUCUCUU 5'  
AT3G11910.1 3705 3723  
ubiquitin carboxyl-terminal hydrolase like protein

SRNA\_AG01\_SoLexa\_Mi2008\_3\_7100\_hit6  
5' CAU-GAAAUUGAUGUUGCGC  
||| ||| |||||  
GUAACUU-AACUACAACGCA 5'  
AT3G11910.1 532 550  
ubiquitin carboxyl-terminal hydrolase like protein

SRNA\_AG01\_SoLexa\_Mi2008\_1\_2096\_hit5

leaves\_1sup\_AG01\_SoIexa\_Mi\_Cell\_2008\_hit\_target\_site.txt

5' AGCUCCCAAAGUUGAUGUC  
|||||  
UCGAGGGUUUCAACU-CAG 5'  
AT3G11964.1 3114 3131  
rRNA biogenesis protein, putative, 3' partial

SRNA\_AG01\_SoIexa\_Mi2008\_1\_9696\_hit1  
5' CUAAGUACAAGGGCCACCCGA  
|||||  
GAUUCAUGUUCCCGGUGGGCU 5'  
AT3G12120.2 699 719  
unknown protein

SRNA\_AG01\_SoIexa\_Mi2008\_1\_9696\_hit1  
5' CUAAGUACAAGGGCCACCCGA  
|||||  
GAUUCAUGUUCCCGGUGGGCU 5'  
AT3G12120.1 738 758  
unknown protein

SRNA\_AG01\_SoIexa\_Mi2008\_1\_48962\_hit1  
5' UUCCACAAAGAUUGAUGUUGU-AG  
|||||: |||||  
AAGGUGUUUCUGUCUACAACACUC 5'  
AT3G12145.1 1098 1121

SRNA\_AG01\_SoIexa\_Mi2008\_1\_48961\_hit1  
5' UUCCACAAAGAUUGAUGUUGUA  
|||||: |||||  
AAGGUGUUUCUGUCUACAACAC 5'  
AT3G12145.1 1099 1120

SRNA\_AG01\_SoIexa\_Mi2008\_3\_22957\_hit1  
5' UAGGCGGGCCUUAUCUAGUUAUUAU  
|||||: | ||||| |||||  
AUCCGCCUG-AAUAGAUCACAAUA 5'  
AT3G12145.1 1310 1332

SRNA\_AG01\_SoIexa\_Mi2008\_2\_33035\_hit1  
5' UCUAUUUAGGCGGGCCUUAUC  
||||| || |||||  
AGAUAAAUCCG-CCUGAAUAG 5'  
AT3G12145.1 1319 1338

SRNA\_AG01\_SoIexa\_Mi2008\_14\_4987\_hit1  
5' CAAGUCGAGCAGCAAUCAG  
| ||||| |||||  
GCUCAGCUCGACGUUUAGUC 5'  
AT3G12570.1 511 530  
unknown protein

SRNA\_AG01\_SoIexa\_Mi2008\_14\_4987\_hit1  
5' CAAGUCGAGCAGCAAUCAG  
| ||||| |||||  
GCUCAGCUCGACGUUUAGUC 5'  
AT3G12570.3 618 637  
unknown protein

SRNA\_AG01\_SoIexa\_Mi2008\_14\_4987\_hit1  
5' CAAGUCGAGCAGCAAUCAG  
| ||||| |||||  
GCUCAGCUCGACGUUUAGUC 5'  
AT3G12570.4 627 646

unknown protein

SRNA\_AG01\_SoLexa\_Mi2008\_14\_4987\_hit1

```
5' CAAGUCGAGCAGCAAUCAG
   | | | | | | | | | | | | | | | | | |
   GCUCAGCUCGACGUUUAGUC 5'
AT3G12570.2    790    809
unknown protein
```

SRNA\_AG01\_SoLexa\_Mi2008\_4\_48532\_hit1

```
5' UUCAAGGUGAUCAAA-GGAAGA
   | | | | | | | | | | | | | | | |
   AAGUCCACUAGUUUCCUUU 5'
AT3G12610.1    1066    1087
unknown protein
```

SRNA\_AG01\_SoLexa\_Mi2008\_1\_26591\_hit1

```
5' UCAAAAAGCAGAA-ACAGAUGGA
   | | | | | | | | | | | | | |
   AGUUUUCGUCUUCU-UCUCCU 5'
AT3G12720.1    909    929
myb like transcription factor
```

SRNA\_AG01\_SoLexa\_Mi2008\_1\_826\_hit13

```
5' AAGAUCUCAGAUGAUGAUUUAU
   | | | | | | | | | | | | | | :
   UUCUAGAGUCUACAACUAAAG 5'
AT3G13080.4    1520    1540
ABC transporter, putative
```

SRNA\_AG01\_SoLexa\_Mi2008\_4\_5870\_hit3

```
5' CAGAAAACAGAAGUAAUACAG
   | | | | | | | | | | | | | | | |
   GUCUUUUGUUUUGAUUUAUUGUC 5'
AT3G13080.4    1654    1675
ABC transporter, putative
```

SRNA\_AG01\_SoLexa\_Mi2008\_9\_51530\_hit4

```
5' UUGC-CAUCAUCAUAAACAGGAG
   | | | | | | | | | | | | | | | |
   AACGUGUAGGAGUCUUUGUCCUC 5'
AT3G13080.4    2939    2961
ABC transporter, putative
```

SRNA\_AG01\_SoLexa\_Mi2008\_2\_568\_hit154

```
5' AAAGUGAUGACAA-AUGAUG
   | | | | | | | | | | | | | | | |
   UUUCACUACUGUUGUA-UAG 5'
AT3G13080.2    3550    3568
ABC transporter, putative
```

SRNA\_AG01\_SoLexa\_Mi2008\_2\_568\_hit154

```
5' AAAGUGAUGACAA-AUGAUG
   | | | | | | | | | | | | | | | |
   UUUCACUACUGUUGUA-UAG 5'
AT3G13080.4    3665    3683
ABC transporter, putative
```

SRNA\_AG01\_SoLexa\_Mi2008\_1\_50661\_hit2

```
5' UUGAGGAGUACUCAG-CACCAA
   | | | | | | | | | | | | | | | |
   AACUCCACAUGAGUCGGU-GUU 5'
AT3G13080.2    4442    4462
```

ABC transporter, putative

SRNA\_AG01\_SoLexa\_Mi2008\_1\_50661\_hit2

5' UUGAGGAGUACUCAG-CACCAA  
| | | | | | | | | | | | | | | | | | | | | |  
AACUCCACAUGAGUCGGU-GUU 5'  
AT3G13080.1 4517 4537

ABC transporter, putative

SRNA\_AG01\_SoLexa\_Mi2008\_1\_50661\_hit2

5' UUGAGGAGUACUCAGC-ACCAA  
| | | | | | | | | | | | | | | | | | | | | |  
AACUCCACAUGAGUCGGU-GUU 5'  
AT3G13080.4 4816 4836

ABC transporter, putative

SRNA\_AG01\_SoLexa\_Mi2008\_1\_20871\_hit4

5' UAGAAGAAAACCGCAGCG-GAC  
| | | | | | | | | | | | | | | | | | | | | |  
AUCUUCUUUUGCCGUCGUCUU 5'  
AT3G13175.1 296 317

unknown protein

SRNA\_AG01\_SoLexa\_Mi2008\_1\_20872\_hit2

5' UAGAAGAAAACCGCAGCG-GAU  
| | | | | | | | | | | | | | | | | | | | | |  
AUCUUCUUUUGCCGUCGUCUU 5'  
AT3G13175.1 296 317

unknown protein

SRNA\_AG01\_SoLexa\_Mi2008\_19\_875\_hit12

5' AAGCUGCUUCGGAUGGGAU  
| | | | | | | | | | | | | | | | | | | | | |  
UUCGACGAAGCCU--CCUA 5'  
AT3G13230.1 15 31

unknown protein

SRNA\_AG01\_SoLexa\_Mi2008\_43\_20590\_hit1

5' UACUGAUGUCAGGAGAGUGUC  
| | | | | | | | | | | | | | | | | | | | | |  
AUGACUACAG-CC-CUCACAG 5'  
AT3G13230.1 371 389

unknown protein

SRNA\_AG01\_SoLexa\_Mi2008\_1\_12910\_hit1

5' CUUGGAGAAGCCAGUAAAUAU  
| | | | | | | | | | | | | | | | | | | | | |  
CAACGUCUUCGGUCAUUUAUA 5'  
AT3G13940.1 894 914

unknown protein

SRNA\_AG01\_SoLexa\_Mi2008\_40\_6132\_hit1

5' CAGAU-AUGAAAGACCGUGAU  
| | | | | | | | | | | | | | | | | | | | | |  
GUCUACUACUUUCUGGCAUUA 5'  
AT3G15010.2 1210 1230

RNA-binding protein

SRNA\_AG01\_SoLexa\_Mi2008\_1\_36946\_hit4

5' UGAUAAG-GUGACAAAGCAUGGU  
| | | | | | | | | | | | | | | | | | | | | |  
ACUUAU-CUCUCUGUUUCGUACCA 5'  
AT3G15010.2 1698 1719

RNA-binding protein

SRNA\_AG01\_SoLexa\_Mi2008\_1\_2266\_hit1

5' AGUCUCAAGAAAUUAAUG  
 ||| |||||: UCA-AGUUCUUUUAUUGG 5'  
 AT3G15010.2 2180 2197  
 RNA-binding protein

SRNA\_AG01\_SoLexa\_Mi2008\_1\_11639\_hit1

5' CUGAUUACA-AAAGUAUGAU  
 ||||| ||| ||||| GACUAAUGUGUUU-AUACUU 5'  
 AT3G15356.1 993 1011

SRNA\_AG01\_SoLexa\_Mi2008\_1\_19217\_hit6

5' UA-CAAUGGUGAAGUGAGGU  
 || ||||| ||||| AUCGUUACCACUACACUCCC 5'  
 AT3G15380.1 1381 1400  
 unknown protein

SRNA\_AG01\_SoLexa\_Mi2008\_1\_24301\_hit71

5' UAUAAUA-CAAUGGUGAAGUGAG  
 |||| || ||||| ||||| AUAAU-AUCGUUACCACUACACUC 5'  
 AT3G15380.1 1383 1404  
 unknown protein

SRNA\_AG01\_SoLexa\_Mi2008\_1\_3901\_hit3

5' CAAAACG-AA-GAAGAUGAUGAG  
 |||| | || ||||| GUUUCCGUUACUUCUACUACUC 5'  
 AT3G15380.1 200 222  
 unknown protein

SRNA\_AG01\_SoLexa\_Mi2008\_1\_4253\_hit1

5' CA-AAUGACGUGGUGCGUGCUG  
 || || || ||||| GUCUU-CUCCACCACGCACGAC 5'  
 AT3G15380.1 2120 2140  
 unknown protein

SRNA\_AG01\_SoLexa\_Mi2008\_1\_50944\_hit1

5' UUGAGUUGAUGAUUAGCAAAG  
 ||||| ||||| AACUCAACAACUAAUCGUUUC 5'  
 AT3G15430.1 755 775  
 unknown protein

SRNA\_AG01\_SoLexa\_Mi2008\_4\_46099\_hit5

5' UGUUUGAGUUGAUGAUUAGCA  
 : ||||| ||||| GGAAACUCAACAACUAAUCGU 5'  
 AT3G15430.1 758 778  
 unknown protein

SRNA\_AG01\_SoLexa\_Mi2008\_1\_50944\_hit1

5' UUGAGUUGAUGAUUAGCAAAG  
 ||||| ||||| AACUCAACAACUAAUCGUUUC 5'  
 AT3G15430.2 883 903  
 unknown protein

leaves\_1sup\_AG01\_SoLexa\_Mi\_Cell\_2008\_hit\_target\_site.txt

SRNA\_AG01\_SoLexa\_Mi2008\_4\_46099\_hit5

5' UGUUUUGAGUUUGAUGAUUAGCA  
: ||||| |||||  
GGAAACUCAACAACUAAUCGU 5'  
AT3G15430.2 886 906  
unknown protein

SRNA\_AG01\_SoLexa\_Mi2008\_2\_14225\_hit1

5' GAUG-AAAGAAAGGAAAAGA  
||| |||||:|||||  
CUACAUUUCUUUCUUUUUCU 5'  
AT3G15520.1 1477 1496  
cyclophilin like protein (AtCYP37)

SRNA\_AG01\_SoLexa\_Mi2008\_1\_7534\_hit1

5' CAUUUGUUUAGUGUUUGUGAU  
|||||  
GUAACAAAUCACAAACACUA 5'  
AT3G15570.1 1681 1701  
non-phototropic hypocotyl protein, putative

SRNA\_AG01\_SoLexa\_Mi2008\_1\_7006\_hit1

5' CAUCAUCAUCAUCACAGAAG  
||||| |||  
GUAGUAGUAGUAGU-UCUGG 5'  
AT3G15970.1 231 249  
unknown protein

SRNA\_AG01\_SoLexa\_Mi2008\_3\_14780\_hit1

5' GCUGAGUUGAAGGUGAAGGA  
||| ||||| |||  
CGACGCAACUCCAC-UCCU 5'  
AT3G16050.1 156 174  
putative ethylene-inducible protein

SRNA\_AG01\_SoLexa\_Mi2008\_1\_22925\_hit5

5' UAGGCCGUAUCUUGUCUCUCC  
||| || || |||||  
AUC-GG-AGAAGAACAGAGAGG 5'  
AT3G16150.1 119 138  
L-asparaginase like protein

SRNA\_AG01\_SoLexa\_Mi2008\_2\_3790\_hit1

5' AUUGUUUCACGGUGUUUAUG  
||| ||||| |||  
UAA-AAAGUGCCACCAA-UAG 5'  
AT3G16150.1 350 368  
L-asparaginase like protein

SRNA\_AG01\_SoLexa\_Mi2008\_1\_34561\_hit2

5' UGAAGAGCA--GAUGGAGCAUUU  
||||| || |||||  
ACUUCUGGUGUCUACCUCGUAAA 5'  
AT3G16290.1 1500 1522  
putative FtsH-like metalloprotease

SRNA\_AG01\_SoLexa\_Mi2008\_1\_34805\_hit1

5' UGAAGGUAAUAGAUG-GAUCAA  
||||| ||| |  
ACUCCAUAUCUACACUACUA 5'  
AT3G16450.3 299 320  
putative lectin

leaves\_1sup\_AG01\_SoLexa\_Mi\_Cell\_2008\_hit\_target\_site.txt

SRNA\_AG01\_SoLexa\_Mi2008\_1\_34805\_hit1  
5' UGAAGGUAAUAGAUG-GAUCAA  
|||  
ACUUCCAUUAUCUACACUACUA 5'  
AT3G16450.1 378 399  
putative lectin

SRNA\_AG01\_SoLexa\_Mi2008\_1\_34805\_hit1  
5' UGAAGGUAAUAGAUG-GAUCAA  
|||  
ACUUCCAUUAUCUACACUACUA 5'  
AT3G16450.2 387 408  
putative lectin

SRNA\_AG01\_SoLexa\_Mi2008\_1\_54445\_hit1  
5' UUUAGGUGC-UUCAACUGCGGUA  
|||  
CAAUCCACGGAAGUUGACGCCAC 5'  
AT3G16450.3 709 731  
putative lectin

SRNA\_AG01\_SoLexa\_Mi2008\_1\_54445\_hit1  
5' UUUAGGUGC-UUCAACUGCGGUA  
|||  
CAAUCCACGGAAGUUGACGCCAC 5'  
AT3G16450.1 788 810  
putative lectin

SRNA\_AG01\_SoLexa\_Mi2008\_1\_54445\_hit1  
5' UUUAGGUGC-UUCAACUGCGGUA  
|||  
CAAUCCACGGAAGUUGACGCCAC 5'  
AT3G16450.2 797 819  
putative lectin

SRNA\_AG01\_SoLexa\_Mi2008\_1\_7584\_hit16  
5' CCA-AAUGCAGAAACCCAUCUU  
|||  
UGUGUUACGUCUUUGGGU-GAA 5'  
AT3G16470.1 1557 1577  
putative lectin

SRNA\_AG01\_SoLexa\_Mi2008\_1\_7584\_hit16  
5' CCA-AAUGCAGAAACCCAUCUU  
|||  
UGUGUUACGUCUUUGGGU-GAA 5'  
AT3G16470.2 1562 1582  
putative lectin

SRNA\_AG01\_SoLexa\_Mi2008\_1\_10010\_hit16  
5' CUACUCAACUCCGAUGUG  
|||  
GAUGAGUUGUAGGCU-CAC 5'  
AT3G16720.1 922 939  
putative RING zinc finger protein

SRNA\_AG01\_SoLexa\_Mi2008\_1\_17728\_hit1  
5' UAAGAAAUGUGGUAGG-AGUUGUA  
|||  
AUUCUUUACACCA-CCAUCAUCAU 5'  
AT3G17390.1 130 152  
s-adenosylmethionine synthetase like protein

leaves\_1sup\_AG01\_SoLexa\_Mi\_Cell\_2008\_hit\_target\_site.txt

SRNA\_AG01\_SoLexa\_Mi2008\_1\_3030\_hit2  
5' AUGAGGA-GGAAGAUGGUUUG  
    ||||| | |||||  
    UACUC-UACCUUCUACCAAAA 5'  
AT3G17390.1    890    909  
s-adenosylmethionine synthetase like protein

SRNA\_AG01\_SoLexa\_Mi2008\_7\_42823\_hit1  
5' UGGGUUGAGGUGGAAGAUGGU  
    |||||||:|||||||  
    ACCCAACUCUACCUUCUACCA 5'  
AT3G17390.1    892    912  
s-adenosylmethionine synthetase like protein

SRNA\_AG01\_SoLexa\_Mi2008\_1\_15600\_hit1  
5' GUCAGAAAAUUAGAUUUU  
    ||||||| |||||  
    CAGUCUUUUA--UAUAAA 5'  
AT3G17800.2    59    75  
unknown protein

SRNA\_AG01\_SoLexa\_Mi2008\_2\_16482\_hit2  
5' UAAACAAAGUGA-UAAACCCC  
    ||||||| |||||  
    AUUUGUUUCACUGAUUUGGCC 5'  
AT3G18080.1    1641    1661  
beta-glucosidase like protein

SRNA\_AG01\_SoLexa\_Mi2008\_1\_21386\_hit1  
5' UAGAG-GAGUUCAAGUUACCAA  
    | ||| ||||| ||||| ||  
    AGCUCUCUCAAGUUCAAUG-UU 5'  
AT3G18080.1    1678    1698  
beta-glucosidase like protein

SRNA\_AG01\_SoLexa\_Mi2008\_2\_36326\_hit1  
5' UGAGGAUGAUGGAUUUAGAUC  
    ||||||| ||||| | ||  
    ACUCCUACUACCUAAA-C-AG 5'  
AT3G18130.1    171    189  
protein kinase C-receptor/G-protein, putative

SRNA\_AG01\_SoLexa\_Mi2008\_1\_242\_hit3  
5' AAA-AGUGAAGAGAUAGAUCGA  
    ||| ||||| |||||:  
    UUUAUCACUUCUCUAUCUAGUC 5'  
AT3G18190.1    1023    1044  
chaperonin subunit, putative

SRNA\_AG01\_SoLexa\_Mi2008\_5\_23592\_hit1  
5' UAGGUUUGGAUGUCUCU-UUCA  
    ||||||| ||| ||| |  
    AUCCAAACCUACAAAGACAACU 5'  
AT3G18290.1    3008    3029  
zinc finger protein, putative

SRNA\_AG01\_SoLexa\_Mi2008\_1\_44333\_hit1  
5' UGUAGUCCGUUGUC-UUCACA  
    ||||||| ||| | |||||  
    ACAUCAAGGAAAC-GCAAGUGU 5'  
AT3G18290.1    3956    3976  
zinc finger protein, putative

leaves\_1sup\_AG01\_SoLexa\_Mi\_Cell\_2008\_hit\_target\_site.txt

SRNA\_AG01\_SoLexa\_Mi2008\_2\_13419\_hit2

5' GAAGAAGAAGAAGACACUU  
|  
CUUCUUCUUCUUCUGUGUC 5'  
AT3G18290.1 395 413  
zinc finger protein, putative

SRNA\_AG01\_SoLexa\_Mi2008\_2\_51\_hit1

5' AAAAAAG-AAGAGAAACAAAGA  
|  
UUUUUUCCUU-UCUUUUUUUCU 5'  
AT3G18290.1 4111 4131  
zinc finger protein, putative

SRNA\_AG01\_SoLexa\_Mi2008\_2\_53729\_hit1

5' UUGUUAACUAAAAACACUUC  
|  
AACAAUUGAUAA-AUGUGAGA 5'  
AT3G18290.1 4372 4391  
zinc finger protein, putative

SRNA\_AG01\_SoLexa\_Mi2008\_5\_479\_hit1

5' AAAGGAAGAAGAUUGG-AGUU  
|  
GUUC-UUCUUCUAUACCCUCA 5'  
AT3G19100.1 131 151  
CDPK-related kinase

SRNA\_AG01\_SoLexa\_Mi2008\_4\_10938\_hit2

5' CUCCUUCU-GCAGUUGUAUGUU  
|  
UUGGAAGAACGUCAACAUACAA 5'  
AT3G19100.1 2046 2067  
CDPK-related kinase

SRNA\_AG01\_SoLexa\_Mi2008\_20\_28243\_hit2

5' UCAGCAAAG-GAUGGUGAGGGAC  
|  
AGUGGUUCCUCUACCACUCCUG 5'  
AT3G19160.1 334 356  
tRNA isopentenyl transferase, putative

SRNA\_AG01\_SoLexa\_Mi2008\_1\_32180\_hit1

5' UCGGGUUAAGUGGUAUGUGGU  
|  
AGCCCAAUUCACCAUACACCA 5'  
AT3G20810.3 50 70  
unknown protein

SRNA\_AG01\_SoLexa\_Mi2008\_1\_32180\_hit1

5' UCGGGUUAAGUGGUAUGUGGU  
|  
AGCCCAAUUCACCAUACACCA 5'  
AT3G20810.2 82 102  
unknown protein

SRNA\_AG01\_SoLexa\_Mi2008\_10\_13861\_hit1

5' GACUGAGGAUUGGACCGAA  
:  
UGGACUCCUAACCUAGCUU 5'  
AT3G21630.1 237 255  
receptor like protein kinase

leaves\_1sup\_AG01\_SoLexa\_Mi\_Cell\_2008\_hit\_target\_site.txt

SRNA\_AG01\_SoLexa\_Mi2008\_1\_26584\_hit1

5' UCAAAAAGAAGAAA-GAUGAGAAGAU  
|||||  
AGUUUUUCUUCUUUACU-CUCCUCUA 5'  
AT3G21670.1 30 53  
nitrate transporter

SRNA\_AG01\_SoLexa\_Mi2008\_5\_29024\_hit1

5' UCAUGGUUUCAAGAAUGCU  
|||||  
UGUACCAAAGUUCUUA-GA 5'  
AT3G22104.1 1157 1174  
hypothetical protein, 3' partial

SRNA\_AG01\_SoLexa\_Mi2008\_14\_49272\_hit2

5' UUCGAUGGAGAUGG-ACAAGUU  
|||||  
AAGCUACCUCUACCUUGUUCUU 5'  
AT3G22104.1 1331 1352  
hypothetical protein, 3' partial

SRNA\_AG01\_SoLexa\_Mi2008\_1\_54841\_hit3

5' UUUCC-UUUCAAGACACGCCAC  
|||||  
AAAGGGAAA-UUUCUGUGCUGUG 5'  
AT3G22350.1 605 626  
hypothetical protein

SRNA\_AG01\_SoLexa\_Mi2008\_1\_33308\_hit1

5' UCUCUCUGUUGUGAAGUCAAA  
|||||:|:|  
AGAGAGACAACAUUUUAGUUU 5'  
AT3G22350.1 669 689  
hypothetical protein

SRNA\_AG01\_SoLexa\_Mi2008\_1\_43578\_hit1

5' UGGUGGUGGUGAUGAUG-UGUC  
|||||  
ACCACCACAACUACUACCACAC 5'  
AT3G22440.1 1650 1671  
unknown protein

SRNA\_AG01\_SoLexa\_Mi2008\_1\_49525\_hit4

5' UUCGGUGGUGUUGAUUGAUC  
|||  
AA-CCACCACAACUA-CUAC 5'  
AT3G22440.1 1655 1672  
unknown protein

SRNA\_AG01\_SoLexa\_Mi2008\_1\_1171\_hit3

5' AAUGGUGCUGAUGGU-GAAGUU  
|||||  
UUACAACGACUACCACUU-AA 5'  
AT3G22440.1 1671 1691  
unknown protein

SRNA\_AG01\_SoLexa\_Mi2008\_19\_34341\_hit1

5' UGAACACCAGGA-UAGUAGCAC  
|||||  
ACUUGUGGUC-UCAUCAUCGUC 5'  
AT3G22440.1 1773 1793  
unknown protein

leaves\_1sup\_AG01\_SoLexa\_Mi\_Cell\_2008\_hit\_target\_site.txt

SRNA\_AG01\_SoLexa\_Mi2008\_7\_11649\_hit2  
5' CUGAUUGAUGAUGAUGGAUCU  
    ||||| |||||  
    AACUA-CUACUACUACCUAGU 5'  
AT3G22530.1     399     418  
unknown protein

SRNA\_AG01\_SoLexa\_Mi2008\_4\_42709\_hit1  
5' UGGGUGAUGAUGAUGAUUGAU  
    ||||| |||||  
    CCCCAAUACUACUACUA-CUA 5'  
AT3G22530.1     405     424  
unknown protein

SRNA\_AG01\_SoLexa\_Mi2008\_1\_4324\_hit2  
5' CAACA-AAUGCAACAGUACGA  
    ||||| || |||||  
    GUUGUGUU-CGUUGUCAUUGUU 5'  
AT3G22530.1     729     749  
unknown protein

SRNA\_AG01\_SoLexa\_Mi2008\_9\_5443\_hit29  
5' CACCACCAUCACCAUCACUCG  
    |||||||:||||||| ||:  
    GUGGUGGUGGUGGUAGU-AGU 5'  
AT3G22530.1     796     815  
unknown protein

SRNA\_AG01\_SoLexa\_Mi2008\_4\_12827\_hit3  
5' CUUGAUUGAUUGGAUU-AAU  
    |||||||:|||| |||  
    UAACUAACUAACUUAAGUUA 5'  
AT3G22845.1     120     139  
unknown protein

SRNA\_AG01\_SoLexa\_Mi2008\_1\_4733\_hit1  
5' CAAGCCCAUCAUUGAUAGUUA  
    ||||||| || |||||  
    GUUCGGGUAGUAAAC-AUGAAGU 5'  
AT3G22890.1     758     778  
ATP sulfurylase like protein

SRNA\_AG01\_SoLexa\_Mi2008\_2\_28866\_hit1  
5' UCAUCAUCGCCGUCGGUUGGA  
    |||||||  
    AGUAGUAGCGGCAGCCAACCU 5'  
AT3G22970.2     1577     1597  
unknown protein

SRNA\_AG01\_SoLexa\_Mi2008\_2\_28866\_hit1  
5' UCAUCAUCGCCGUCGGUUGGA  
    |||||||  
    AGUAGUAGCGGCAGCCAACCU 5'  
AT3G22970.1     1579     1599  
unknown protein

SRNA\_AG01\_SoLexa\_Mi2008\_1\_11311\_hit1  
5' CUGAAAAAAA-AAGAGAGGG  
    ||||||| |||||  
    AACUUUUUUUGUUCUCUCCA 5'  
AT3G22970.2     1792     1811  
unknown protein

leaves\_1sup\_AG01\_SoLexa\_Mi\_Cell\_2008\_hit\_target\_site.txt

SRNA\_AG01\_SoLexa\_Mi2008\_1\_11311\_hit1  
5' CUGAAAAAAA-AAGAGAGGG  
|||||  
AACUUUUUUUGUUCUCUCCA 5'  
AT3G22970.1 1794 1813  
unknown protein

SRNA\_AG01\_SoLexa\_Mi2008\_1\_39984\_hit1  
5' UGGACCAUAGAAUGCAUUUGAU  
|||||  
ACCUGGUAUCUUACGUAAACUA 5'  
AT3G23120.1 1508 1529  
disease resistance protein, putative

SRNA\_AG01\_SoLexa\_Mi2008\_1\_51216\_hit1  
5' UUGAUGUUGGACAGAAACGAG  
|||||  
AACUACAACCUUCUUUGCUC 5'  
AT3G23120.1 2039 2059  
disease resistance protein, putative

SRNA\_AG01\_SoLexa\_Mi2008\_1\_16206\_hit2  
5' GUUGUUGCAG-UUAAAAAGC  
|||||  
GAACAACGUCAAAUUUUUCU 5'  
AT3G23120.1 315 334  
disease resistance protein, putative

SRNA\_AG01\_SoLexa\_Mi2008\_1\_18581\_hit2  
5' UAAGUUGUUGCAG-UUAAAAAG  
|||||  
AUUCUACAACGUCAAAUUUUUC 5'  
AT3G23120.1 316 337  
disease resistance protein, putative

SRNA\_AG01\_SoLexa\_Mi2008\_2\_54009\_hit2  
5' UUUUAGUUGUUGCAG-UUAAAA  
|:|||||  
AGAUUCUACAACGUCAAAUUUU 5'  
AT3G23120.1 318 339  
disease resistance protein, putative

SRNA\_AG01\_SoLexa\_Mi2008\_1\_13417\_hit1  
5' GAAGAAUAGAUGGUAUAGU  
|||||  
CUUCUUUAUCUACCAUUAUCA 5'  
AT3G23120.1 36 56  
disease resistance protein, putative

SRNA\_AG01\_SoLexa\_Mi2008\_1\_32978\_hit1  
5' UCUAGUUGUUUAGGUUACCU  
|||||  
AGAUCAACCAAUCCAAUGGC 5'  
AT3G23120.1 461 481  
disease resistance protein, putative

SRNA\_AG01\_SoLexa\_Mi2008\_3\_4691\_hit4  
5' CAAGAUGUUUUUCUUGUGG-GA  
|||  
GUU-UACAAAAAGAACACCACU 5'  
AT3G23250.2 229 249  
myb-related transcription factor like protein

leaves\_1sup\_AG01\_SoLexa\_Mi\_Cell\_2008\_hit\_target\_site.txt

SRNA\_AG01\_SoLexa\_Mi2008\_3\_4691\_hit4  
5' CAAGAUGUUUUUCUUGUGG-GA  
||| ||||||||||||||||| ||  
GUU-UACAAAAAGAACACCACU 5'  
AT3G23250.1 230 250  
myb-related transcription factor like protein

SRNA\_AG01\_SoLexa\_Mi2008\_2\_56220\_hit2  
5' UUUGUUU-CGGGUCAUAACG  
||||||| ||| |||||||||  
AAACAAAUGCC-AGUAAUUGC 5'  
AT3G23390.1 179 197  
putative ribosomal protein

SRNA\_AG01\_SoLexa\_Mi2008\_1\_3905\_hit2  
5' CA-AAACGGAGAGAU-GGGUUCA  
|| ||||||||||||||| |||||||  
GUCUUUGCCUCUCUAGCCCAAGU 5'  
AT3G23640.1 105 127  
alpha glucosidase like protein

SRNA\_AG01\_SoLexa\_Mi2008\_1\_3905\_hit2  
5' CA-AAACGGAGAGAU-GGGUUCA  
|| ||||||||||||||| |||||||  
GUCUUUGCCUCUCUAGCCCAAGU 5'  
AT3G23640.2 108 130  
alpha glucosidase like protein

SRNA\_AG01\_SoLexa\_Mi2008\_1\_17728\_hit1  
5' UAAGAAAUGUGGUAGGAGUUG-UA  
||| ||||||||||||||||||||| ||  
AUU-UUUACACCAUCCUCAACCAU 5'  
AT3G23640.1 1742 1764  
alpha glucosidase like protein

SRNA\_AG01\_SoLexa\_Mi2008\_1\_17728\_hit1  
5' UAAGAAAUGUGGUAGGAGUUG-UA  
||| ||||||||||||||||||||| ||  
AUU-UUUACACCAUCCUCAACCAU 5'  
AT3G23640.2 1765 1787  
alpha glucosidase like protein

SRNA\_AG01\_SoLexa\_Mi2008\_1\_3119\_hit1  
5' AUGCAAAAGAGU-AA-GAUGGAU  
||||||||||| || | |||||  
UACGUUUUCUCACUUUCAACCUA 5'  
AT3G23640.1 2862 2884  
alpha glucosidase like protein

SRNA\_AG01\_SoLexa\_Mi2008\_12\_3118\_hit1  
5' AUGCAAAAGAGU-AA-GAUGGA  
||||||||||| || | |||||  
UACGUUUUCUCACUUUCAACCU 5'  
AT3G23640.1 2863 2884  
alpha glucosidase like protein

SRNA\_AG01\_SoLexa\_Mi2008\_1\_3117\_hit1  
5' AUGCAAAAGAGU-A-AGAUGG  
||||||||||| | || |||  
UACGUUUUCUCACUUUCAACC 5'  
AT3G23640.1 2864 2884  
alpha glucosidase like protein

leaves\_1sup\_AG01\_SoLexa\_Mi\_Cell\_2008\_hit\_target\_site.txt

SRNA\_AG01\_SoLexa\_Mi2008\_1\_3119\_hit1

5' AUGCAAAAGAGU--AAGAUGGAU  
|||||  
UACGUUUUCUCACUUUCAACCUA 5'  
AT3G23640.2 2885 2907  
alpha glucosidase like protein

SRNA\_AG01\_SoLexa\_Mi2008\_12\_3118\_hit1

5' AUGCAAAAGAGU--AAGAUGGA  
|||||  
UACGUUUUCUCACUUUCAACCU 5'  
AT3G23640.2 2886 2907  
alpha glucosidase like protein

SRNA\_AG01\_SoLexa\_Mi2008\_1\_3117\_hit1

5' AUGCAAAAGAGU--AAGAUGG  
|||||  
UACGUUUUCUCACUUUCAACC 5'  
AT3G23640.2 2887 2907  
alpha glucosidase like protein

SRNA\_AG01\_SoLexa\_Mi2008\_1\_1743\_hit1

5' ACUGGUUAUAAAGAAGGAUGGUU  
|||||  
UGACCAUAUUGCUU-C-ACCAA 5'  
AT3G23640.1 559 578  
alpha glucosidase like protein

SRNA\_AG01\_SoLexa\_Mi2008\_1\_1743\_hit1

5' ACUGGUUAUAAAGAAGGAUGGUU  
|||||  
UGACCAUAUUGCUU-C-ACCAA 5'  
AT3G23640.2 582 601  
alpha glucosidase like protein

SRNA\_AG01\_SoLexa\_Mi2008\_1\_5045\_hit1

5' CAAGUUAAG-UGGAUGAUUGGU  
|||||  
GUUCAAUUCUACC-ACUAACCA 5'  
AT3G23990.1 1857 1877  
mitochondrial chaperonin hsp60

SRNA\_AG01\_SoLexa\_Mi2008\_1\_15541\_hit2

5' GUAGUUGUGAUACAUGGAA-GAC  
|||||  
CAUCAACACUACGUACCUUUCUU 5'  
AT3G25190.1 728 750  
unknown protein

SRNA\_AG01\_SoLexa\_Mi2008\_2\_16\_hit1

5' AAAAAAGAGAGGGACGAA  
| |||||:|||||  
UCUUUUUCUCUCUGCUU 5'  
AT3G25620.1 24 42  
membrane transporter, putative

SRNA\_AG01\_SoLexa\_Mi2008\_1\_6037\_hit2

5' CAGAGAGCUUUGGUGUGAUU-UU  
|||||  
GUCUCUCUAAACCACAC-AACAA 5'  
AT3G25620.1 3 24  
membrane transporter, putative

leaves\_1sup\_AG01\_SoLexa\_Mi\_Cell\_2008\_hit\_target\_site.txt

SRNA\_AG01\_SoLexa\_Mi2008\_10\_6651\_hit1

5' CAGGUUAGUUAGAUCAGUGAU  
|||||  
GUCCAAUCAAUCUAGUCACUA 5'  
AT3G26500.1 1046 1066  
unknown protein

SRNA\_AG01\_SoLexa\_Mi2008\_1\_41910\_hit1

5' UGGGAUCUCAAGCGGGUUUUGGU  
|||||  
ACCCUAGAGUUCGCCAAAACCA 5'  
AT3G26500.1 1152 1174  
unknown protein

SRNA\_AG01\_SoLexa\_Mi2008\_2\_17160\_hit1

5' UAACAACUUCAGCUCCUUGAGU  
|||||  
AUUGUUGAAGUCGAGGAACUCA 5'  
AT3G26500.1 1190 1211  
unknown protein

SRNA\_AG01\_SoLexa\_Mi2008\_2\_33514\_hit1

5' UCUGCCAUGAUUACCCCAUC  
|||||  
AGACGGUACUUAUAGUGGGUAG 5'  
AT3G26500.1 1230 1251  
unknown protein

SRNA\_AG01\_SoLexa\_Mi2008\_1\_823\_hit1

5' AAGAUAAUUUAGCAGAAGUC  
|||||  
UUCUAAUAAAUCGUCUUCAG 5'  
AT3G26500.1 1434 1453  
unknown protein

SRNA\_AG01\_SoLexa\_Mi2008\_1\_6741\_hit1

5' CAGUGUUUUUGUGAUUCAUA  
|| |||||  
GU-ACCAAAAACACUAA-UAA 5'  
AT3G26500.1 5 23  
unknown protein

SRNA\_AG01\_SoLexa\_Mi2008\_1\_10652\_hit1

5' CUCAAGUGUCGUUAG-CUCA  
||||| ||||| |||  
GAGUCAAAGCAAUCAGAGG 5'  
AT3G26500.1 976 995  
unknown protein

SRNA\_AG01\_SoLexa\_Mi2008\_1\_45425\_hit9

5' UGUGGGUA-UGGAAUUCGGAAC  
||||| | ||||| |||||  
ACACCCAUCA-CUUAACCCUUG 5'  
AT3G27060.1 295 315  
ribonucleotide reductase small subunit, putative

SRNA\_AG01\_SoLexa\_Mi2008\_2\_28149\_hit1

5' UCAGAGUA-GUUAUGAUUGAUA  
||| || | |||||  
AGU-UCCUCAAUACUAAUAU 5'  
AT3G27380.2 1298 1318  
succinate dehydrogenase iron-protein subunit, putative

leaves\_1sup\_AG01\_SoLexa\_Mi\_Cell\_2008\_hit\_target\_site.txt

SRNA\_AG01\_SoLexa\_Mi2008\_2\_28149\_hit1

5' UCAGAGUA-GUUAUGAUUGAUA  
||| || | |||||  
AGU-UCCUCAAUACUAACUAU 5'

AT3G27380.1 1299 1319

succinate dehydrogenase iron-protein subunit, putative

SRNA\_AG01\_SoLexa\_Mi2008\_1\_28630\_hit1

5' UCAGUACUUGCAGUGAU-GUUAC  
||||| || ||||  
AGUCAUGAACGUCAAUAUGAAUG 5'

AT3G27380.2 1336 1358

succinate dehydrogenase iron-protein subunit, putative

SRNA\_AG01\_SoLexa\_Mi2008\_1\_28630\_hit1

5' UCAGUACUUGCAGUGAU-GUUAC  
||||| || ||||  
AGUCAUGAACGUCAAUAUGAAUG 5'

AT3G27380.1 1337 1359

succinate dehydrogenase iron-protein subunit, putative

SRNA\_AG01\_SoLexa\_Mi2008\_1\_34187\_hit1

5' UGAAACUAUCGUGUCUGAUUGGUA  
||| ||| ||||| |||||  
ACUCUGACAGCACAACUAACCAU 5'

AT3G27380.1 2097 2120

succinate dehydrogenase iron-protein subunit, putative

SRNA\_AG01\_SoLexa\_Mi2008\_1\_34187\_hit1

5' UGAAACUAUCGUGUCUGAUUGGUA  
||| ||| ||||| |||||  
ACUCUGACAGCACAACUAACCAU 5'

AT3G27380.2 2198 2221

succinate dehydrogenase iron-protein subunit, putative

SRNA\_AG01\_SoLexa\_Mi2008\_3\_39684\_hit1

5' UGGAACGGAAGCUUGCGGAUC  
||||| |||||:|||||  
ACCUUCCUUCGAAUGCCUAG 5'

AT3G27380.1 2349 2369

succinate dehydrogenase iron-protein subunit, putative

SRNA\_AG01\_SoLexa\_Mi2008\_3\_39684\_hit1

5' UGGAACGGAAGCUUGCGGAUC  
||||| |||||:|||||  
ACCUUCCUUCGAAUGCCUAG 5'

AT3G27380.2 2450 2470

succinate dehydrogenase iron-protein subunit, putative

SRNA\_AG01\_SoLexa\_Mi2008\_2\_4570\_hit2

5' CAAGAAGAGAUUCCAUAGU  
|||||  
UUUCUUCUCUAAGGUUAUAC 5'

AT3G28150.1 466 484

unknown protein (At3g28150)

SRNA\_AG01\_SoLexa\_Mi2008\_1\_7324\_hit1

5' CAUGGUGUAGAUUUUGAUGAA  
||||| |||||  
CUACCACUUCUAAAACUACUU 5'

AT3G28210.1 600 620

zinc finger protein (PMZ), putative

leaves\_1sup\_AG01\_SoLexa\_Mi\_Cell\_2008\_hit\_target\_site.txt

SRNA\_AG01\_SoLexa\_Mi2008\_1\_42\_hit14

5' AAAAAACAGAAAACAA-UGGAU  
|||||  
UUUUUUUGUCUUGUGUUAACCAA 5'  
AT3G28220.1 1161 1182  
unknown protein

SRNA\_AG01\_SoLexa\_Mi2008\_1\_16297\_hit1

5' UAAAAAGUGGAGCAGAUGGUU  
|||||  
UUUUUUUACCUCUUCUACCAA 5'  
AT3G28320.1 1232 1252  
At14a-like protein

SRNA\_AG01\_SoLexa\_Mi2008\_1\_41650\_hit1

5' UGGCUGUCCAAAGUUCUUGUAA  
|||||: |||||  
ACCGACAGGUUUCGCGAACAAUC 5'  
AT3G28360.1 3232 3253  
P-glycoprotein like protein

SRNA\_AG01\_SoLexa\_Mi2008\_4\_13945\_hit10

5' GAGAGCAACAUG-UUUACCAG  
||||| | |||||  
CUCUCGUUGU-CUAAAUGGUC 5'  
AT3G28415.1 1094 1113  
putative protein

SRNA\_AG01\_SoLexa\_Mi2008\_1\_5286\_hit1

5' CACAAGGAAGAGUAUGUCCU  
|||||  
UUGUCCUUCUCACACAAGGU 5'  
AT3G28415.1 3584 3604  
putative protein

SRNA\_AG01\_SoLexa\_Mi2008\_1\_22037\_hit1

5' UAGC-A-CAAGGAAGAGUAUGUUC  
||| | ||||| |||||  
AUCGAUUGUCCUUCUCACACAAG 5'  
AT3G28415.1 3587 3610  
putative protein

SRNA\_AG01\_SoLexa\_Mi2008\_2\_4327\_hit3

5' CAA-CAACAGCAGCCACCACCU  
||| ||||| |||||  
GUUAGUUGUAGUCGGUGGUGGU 5'  
AT3G28490.1 203 224  
prolyl 4-hydroxylase, putative

SRNA\_AG01\_SoLexa\_Mi2008\_1\_49142\_hit1

5' UUCCUCAGGAAGAUAAUGGU  
||||| || |||  
AAGGAGUCCUUCU-UU-CCA 5'  
AT3G28490.1 328 345  
prolyl 4-hydroxylase, putative

SRNA\_AG01\_SoLexa\_Mi2008\_1\_7688\_hit1

5' CCACCACCACCUCCAGCGCCAC  
||||| |||  
GGUGGUGGUGGAGGUCG-G-UG 5'  
AT3G28500.1 330 349  
acidic ribosomal protein P2b (rpp2b), putative  
Page 160

leaves\_1sup\_AG01\_SoLexa\_Mi\_Cell\_2008\_hit\_target\_site.txt

SRNA\_AG01\_SoLexa\_Mi2008\_4\_13685\_hit6

5' GACCAUAUGGACAAUGGGC  
 :||| |||||  
 UUGGAAUACCGUUACCCU 5'  
 AT3G28740.1 1491 1509  
 cytochrome P450 like protein

SRNA\_AG01\_SoLexa\_Mi2008\_3\_768\_hit1

5' AAGAAGAGAGAGAAUUGAG  
 |||| |  
 UUCU-CUCUCUCUUA-UC 5'  
 AT3G28740.1 38 54  
 cytochrome P450 like protein

SRNA\_AG01\_SoLexa\_Mi2008\_8\_4655\_hit1

5' CAAGAGUGUUUGAGAGAU  
 ||||| | || |||||  
 GUUCUCA-AA-CUCUCUAU 5'  
 AT3G28740.1 72 88  
 cytochrome P450 like protein

SRNA\_AG01\_SoLexa\_Mi2008\_1\_13420\_hit2

5' GAAGAAGAAGAAGACUCU  
 ||||| | || |||||  
 CUUCUUCUUCUUCU-A-AA 5'  
 AT3G29000.1 22 38  
 unknown protein

SRNA\_AG01\_SoLexa\_Mi2008\_3\_23318\_hit2

5' UAG-GUAAAAACAUCUGGUCUA  
 ||| ||||| |||||  
 AUCACAUUUU-GUAGACCAGAG 5'  
 AT3G44300.1 961 981  
 nitrilase 2

SRNA\_AG01\_SoLexa\_Mi2008\_3\_23318\_hit2

5' UAG-GUAAAAACAUCUGGUCUA  
 ||| ||||| |||||  
 AUCACAUUUU-GUAGACCAGAG 5'  
 AT3G44310.2 861 881  
 nitrilase 1

SRNA\_AG01\_SoLexa\_Mi2008\_3\_23318\_hit2

5' UAG-GUAAAAACAUCUGGUCUA  
 ||| ||||| |||||  
 AUCACAUUUU-GUAGACCAGAG 5'  
 AT3G44310.3 979 999  
 nitrilase 1

SRNA\_AG01\_SoLexa\_Mi2008\_2\_19350\_hit1

5' UACAGAAGGGAGUGUCACUAG  
 ||||| : ||||| |  
 AUGUCUCCUUCACAGUG-UC 5'  
 AT3G45040.1 278 297  
 unknown protein

SRNA\_AG01\_SoLexa\_Mi2008\_2\_51\_hit1

5' AAAAA-AGAAGAGAAACAAAGA  
 ||||| ||||| |||||  
 UUUUUAUCUUCACUUUGUUUCU 5'  
 AT3G45040.1 947 968  
 unknown protein

leaves\_1sup\_AG01\_SoLexa\_Mi\_Cell\_2008\_hit\_target\_site.txt

SRNA\_AG01\_SoLexa\_Mi2008\_4\_3519\_hit1

5' AUUACUCAGUUUAUACAUAGGG  
|||||  
UAAUGAGUCAAAUUGUAUCC 5'  
AT3G45160.1 519 539  
unknown protein

SRNA\_AG01\_SoLexa\_Mi2008\_3\_13856\_hit1

5' GACUG-ACGACCAAUUGAU  
|||||  
AUGACCUGCUGUUUAACAA 5'  
AT3G45300.1 1090 1109  
isovaleryl-CoA-dehydrogenase precursor (IVD)

SRNA\_AG01\_SoLexa\_Mi2008\_3\_17155\_hit6

5' UAACAACC-UAGGAACUGAUGAG  
||||| | |||:|||||  
AUUGUUUGUAUCUUUGACUACUC 5'  
AT3G45410.1 1941 1963  
receptor-like protein kinase

SRNA\_AG01\_SoLexa\_Mi2008\_5\_16910\_hit1

5' UAAAGUAAGAUGGGAGAGCAGU  
|||||  
UUUUCAUUCUACCGUCUCGUCU 5'  
AT3G45410.1 501 522  
receptor-like protein kinase

SRNA\_AG01\_SoLexa\_Mi2008\_4\_34638\_hit1

5' UGAAGAUUCACUGUUGA--AAGA  
||||| | ||||| |||||  
ACUUCUAAGGGACAACUACUUCU 5'  
AT3G45410.1 715 737  
receptor-like protein kinase

SRNA\_AG01\_SoLexa\_Mi2008\_1\_36072\_hit2

5' UGAGCAUGGUG-UGAUGAUGAUC  
|||| | :|||| | |||||  
ACUC-UGCCACCACUACUACUAG 5'  
AT3G45860.1 758 779  
protein kinase - like

SRNA\_AG01\_SoLexa\_Mi2008\_1\_28151\_hit1

5' UCAGAGUCCAGAUCCCAUCAU  
|| | :|||||  
AG-CUUAGGUCUAGGGUAGUU 5'  
AT3G46620.1 524 543  
unknown protein

SRNA\_AG01\_SoLexa\_Mi2008\_6\_35094\_hit47

5' UGAAUGUGUUUUGGGU-GAA  
||||| | ||| ||  
ACUUACACAAAA-CCAUCUA 5'  
AT3G47340.2 1518 1536  
glutamine-dependent asparagine synthetase

SRNA\_AG01\_SoLexa\_Mi2008\_6\_35094\_hit47

5' UGAAUGUGUUUUGGGU-GAA  
||||| | ||| ||  
ACUUACACAAAAC-CAUCUA 5'  
AT3G47340.1 1519 1537  
glutamine-dependent asparagine synthetase

leaves\_1sup\_AG01\_SoIexa\_Mi\_Cell\_2008\_hit\_target\_site.txt

SRNA\_AG01\_SoIexa\_Mi2008\_6\_35094\_hit47

5' UGAAUGUGUUUUGGGU-GAA  
 |||||  
 ACUUACACAAAA-CCAUCUA 5'  
 AT3G47340.3 1601 1619  
 glutamine-dependent asparagine synthetase

SRNA\_AG01\_SoIexa\_Mi2008\_22\_5333\_hit1

5' CA-CA-GAGAUUGAGAACGAA  
 || ||  
 GUAGUACUCUAACUCUUACUU 5'  
 AT3G47480.1 100 120  
 putative calcium-binding protein

SRNA\_AG01\_SoIexa\_Mi2008\_1\_12752\_hit1

5' CUUGACUUGAGGUGAAGAGAA  
 ||| |  
 GAA-U-AACUCCACUUCUCUU 5'  
 AT3G47480.1 185 203  
 putative calcium-binding protein

SRNA\_AG01\_SoIexa\_Mi2008\_3\_13421\_hit1

5' GAAGAAGAAGAUGAUGUUGAU  
 |||||  
 CUUCUUCUUCUAC-ACA-CUA 5'  
 AT3G47510.1 145 163  
 putative protein

SRNA\_AG01\_SoIexa\_Mi2008\_1\_17742\_hit1

5' UAAGAACCUUGAUGAUGUUGA  
 |||  
 AUU-UUGGAACUACAACAACA 5'  
 AT3G47510.1 35 54  
 putative protein

SRNA\_AG01\_SoIexa\_Mi2008\_1\_17741\_hit1

5' UAAGAACCUUGAUGAUGUUG  
 |||  
 AUU-UUGGAACUACAACAAC 5'  
 AT3G47510.1 36 54  
 putative protein

SRNA\_AG01\_SoIexa\_Mi2008\_3\_18344\_hit1

5' UAAG-GUCGAGGGUGUUGAAU  
 ||||  
 AUUCUCAGCGCCCAACUUA 5'  
 AT3G47540.1 177 197  
 endochitinase-like protein

SRNA\_AG01\_SoIexa\_Mi2008\_2\_13419\_hit2

5' GAAGAAGAAGAAGACA-CUU  
 |||||  
 CUUCUUCUUCUUCU-UCGAU 5'  
 AT3G48390.1 120 138  
 unknown protein

SRNA\_AG01\_SoIexa\_Mi2008\_2\_36913\_hit3

5' UGAGUUU-AUCAGGUGAAUCA  
 ||| |||  
 ACU-AAACUAGUCCACUUUGUU 5'  
 AT3G48390.1 584 604  
 unknown protein

leaves\_1sup\_AG01\_SoLexa\_Mi\_Cell\_2008\_hit\_target\_site.txt

SRNA\_AG01\_SoLexa\_Mi2008\_1\_28025\_hit79

5' UCAGAACUCCGCAGUUAAGCG  
 ||| :  
 AGUCUUGAGGCGUCCAUUCAU 5'  
 AT3G48390.1 98 118  
 unknown protein

SRNA\_AG01\_SoLexa\_Mi2008\_1\_37529\_hit1

5' UGAUUAUGAAACUGUUGAUGUU  
 ||| :  
 ACUAAUACUUUAC-A-UACAA 5'  
 AT3G48720.1 1503 1522  
 unknown protein

SRNA\_AG01\_SoLexa\_Mi2008\_2\_3789\_hit1

5' AUUGUUUACUCUGUAUUCUGU  
 ||| :  
 CAACCAA-GAGACAUAGACA 5'  
 AT3G48870.1 272 291  
 AtClpC

SRNA\_AG01\_SoLexa\_Mi2008\_4\_10817\_hit1

5' CUCCAAGAAAUCAGAUGCC  
 ||| :  
 GAGGUUCUUGAGUCU-CGG 5'  
 AT3G49320.1 674 691  
 unknown protein

SRNA\_AG01\_SoLexa\_Mi2008\_1\_43922\_hit1

5' UGUAAAGUGAAGAUGAAGGA  
 ||| :  
 CCAUUUCACUUCUUCUCCG 5'  
 AT3G49530.1 6 25  
 NAC2-like protein

SRNA\_AG01\_SoLexa\_Mi2008\_11\_8992\_hit1

5' CGGAGGUC-CUGAAUCGUUGUU  
 ||| :  
 GCCUCUAGUG-CUUAGCAACAA 5'  
 AT3G49590.2 135 155  
 unknown protein

SRNA\_AG01\_SoLexa\_Mi2008\_9\_14254\_hit8

5' GAUGAUGAUGAUGAUGAUCUU  
 ||| :  
 CUACUGCUACUACUAGUU 5'  
 AT3G49590.2 18 38  
 unknown protein

SRNA\_AG01\_SoLexa\_Mi2008\_11\_8992\_hit1

5' CGGAGGUC-CUGAAUCGUUGUU  
 ||| :  
 GCCUCUAGUG-CUUAGCAACAA 5'  
 AT3G49590.1 219 239  
 unknown protein

SRNA\_AG01\_SoLexa\_Mi2008\_1\_7006\_hit1

5' CAUCAUCAUCACAGAAG  
 ||| :  
 GUAGUAGUAGUAG-GU-UUA 5'  
 AT3G49590.2 541 558  
 unknown protein

leaves\_1sup\_AG01\_SoLexa\_Mi\_Cell\_2008\_hit\_target\_site.txt

SRNA\_AG01\_SoLexa\_Mi2008\_1\_7006\_hit1

5' CAUCAUCAUCACAGAAG  
 |||  
 GUAGUAGUAGUAG-GU-UUA 5'  
 AT3G49590.1 625 642  
 unknown protein

SRNA\_AG01\_SoLexa\_Mi2008\_1\_16738\_hit1

5' UAAAGAUUGUAGCAUCAAGUUG  
 |||  
 AUUUCUAACAUCGUAGUUCUGC 5'  
 AT3G50470.1 206 227  
 RPW8- like protein 3 (HR3)

SRNA\_AG01\_SoLexa\_Mi2008\_1\_21351\_hit8

5' UAGAGGAAAUGAGUGUGUUUUAUCC  
 |||:|||  
 AUCUUCUUUACUCACACAAUAAGG 5'  
 AT3G50480.1 1006 1029  
 RPW8- like protein 4 (HR4)

SRNA\_AG01\_SoLexa\_Mi2008\_1\_21350\_hit1

5' UAGAGGAAAUGAGUGUGAUU  
 |||:|||  
 AUCUUCUUUACUCACACAAUA 5'  
 AT3G50480.1 1009 1029  
 RPW8- like protein 4 (HR4)

SRNA\_AG01\_SoLexa\_Mi2008\_1\_2507\_hit3

5' AUAGAAGAAAUGAGUGUGUUU  
 |||  
 AUCUUCUUUACUCACACAAU 5'  
 AT3G50480.1 1010 1030  
 RPW8- like protein 4 (HR4)

SRNA\_AG01\_SoLexa\_Mi2008\_1\_37358\_hit1

5' UGAUGGGCCUUUAAUUGGGCAUUC  
 |||:|||  
 ACUACCCGGAAUUAUACCCGUAGG 5'  
 AT3G50480.1 905 928  
 RPW8- like protein 4 (HR4)

SRNA\_AG01\_SoLexa\_Mi2008\_1\_37374\_hit5

5' UGAUGGGUCUUUAAUUGGGCAUCC  
 |||:|||  
 ACUACCCGGAAUUAUACCCGUAGG 5'  
 AT3G50480.1 905 928  
 RPW8- like protein 4 (HR4)

SRNA\_AG01\_SoLexa\_Mi2008\_1\_42681\_hit5

5' UGGGUCUUUAAUUGGGCAU  
 |||:|||  
 ACCCGGAAUUAUACCCGUA 5'  
 AT3G50480.1 907 925  
 RPW8- like protein 4 (HR4)

SRNA\_AG01\_SoLexa\_Mi2008\_1\_37373\_hit5

5' UGAUGGGUCUUUAAUUGGGCAU  
 |||:|||  
 ACUACCCGGAAUUAUACCCGUA 5'  
 AT3G50480.1 907 928  
 RPW8- like protein 4 (HR4)

leaves\_1sup\_AG01\_SoLexa\_Mi\_Cell\_2008\_hit\_target\_site.txt

SRNA\_AG01\_SoLexa\_Mi2008\_1\_37356\_hit1

```
5' UGAUGGGCCUCAUAAUGGGCA
   |||
   ACUACCCGGAAUAAUACCCGU 5'
AT3G50480.1 908 928
RPW8- like protein 4 (HR4)
```

SRNA\_AG01\_SoLexa\_Mi2008\_5\_37357\_hit26

```
5' UGAUGGGCCUUUAAUAAUGGGCA
   |||
   ACUACCCGGAAUAAUACCCGU 5'
AT3G50480.1 908 928
RPW8- like protein 4 (HR4)
```

SRNA\_AG01\_SoLexa\_Mi2008\_1\_12412\_hit2

```
5' CUUAGAUAAUGGGCCUUUAAUAA
   |||
   GAAUCUACUACCCGGAAUAAU 5'
AT3G50480.1 914 934
RPW8- like protein 4 (HR4)
```

SRNA\_AG01\_SoLexa\_Mi2008\_1\_42239\_hit4

```
5' UGGGCUUAGAUGAUGGGUCUUU
   |||
   ACCCGAAUCUACUACCCGGAAUA 5'
AT3G50480.1 916 938
RPW8- like protein 4 (HR4)
```

SRNA\_AG01\_SoLexa\_Mi2008\_2\_42236\_hit1

```
5' UGGGCUUAGAUGAUGGACCUU
   |||
   ACCCGAAUCUACUACCCGGAA 5'
AT3G50480.1 918 938
RPW8- like protein 4 (HR4)
```

SRNA\_AG01\_SoLexa\_Mi2008\_2\_42238\_hit4

```
5' UGGGCUUAGAUGAUGGGUCUU
   |||
   ACCCGAAUCUACUACCCGGAA 5'
AT3G50480.1 918 938
RPW8- like protein 4 (HR4)
```

SRNA\_AG01\_SoLexa\_Mi2008\_2\_42237\_hit4

```
5' UGGGCUUAGAUGAUGGGUCU
   |||
   ACCCGAAUCUACUACCCGGA 5'
AT3G50480.1 919 938
RPW8- like protein 4 (HR4)
```

SRNA\_AG01\_SoLexa\_Mi2008\_1\_14303\_hit4

```
5' GAUGGGCUUAGAUGAUGGGUCU
   |||
   CUACCCGAAUCUACUACCCGGA 5'
AT3G50480.1 919 940
RPW8- like protein 4 (HR4)
```

SRNA\_AG01\_SoLexa\_Mi2008\_4\_37363\_hit4

```
5' UGAUGGGCCUUAGAUGAUGGGU
   |||
   ACUACCCGAAUCUACUACCCG 5'
AT3G50480.1 921 941
RPW8- like protein 4 (HR4)
```

leaves\_1sup\_AG01\_SoLexa\_Mi\_Cell\_2008\_hit\_target\_site.txt

SRNA\_AG01\_SoLexa\_Mi2008\_1\_37364\_hit1

5' UGAUGGGCUUAGAUGAUUGGC  
|||||  
ACUACCCGAAUCUACU-ACCC 5'  
AT3G50480.1 923 942  
RPW8- like protein 4 (HR4)

SRNA\_AG01\_SoLexa\_Mi2008\_3\_14257\_hit30

5' GAUGAUGGGCUUAGAUGAU  
|||||  
CUACUACCCGAAUCUACUA 5'  
AT3G50480.1 925 943  
RPW8- like protein 4 (HR4)

SRNA\_AG01\_SoLexa\_Mi2008\_1\_21813\_hit1

5' UAGAUGAUGGACUUCGAUGAU  
|||||  
AUCUACUACCCGAAUCUACUA 5'  
AT3G50480.1 925 945  
RPW8- like protein 4 (HR4)

SRNA\_AG01\_SoLexa\_Mi2008\_6\_21815\_hit1

5' UAGAUGAUGGGCUUAAAUGAU  
|||||  
AUCUACUACCCGAAUCUACUA 5'  
AT3G50480.1 925 945  
RPW8- like protein 4 (HR4)

SRNA\_AG01\_SoLexa\_Mi2008\_5\_21816\_hit30

5' UAGAUGAUGGGCUUAGAUGAU  
|||||  
AUCUACUACCCGAAUCUACUA 5'  
AT3G50480.1 925 945  
RPW8- like protein 4 (HR4)

SRNA\_AG01\_SoLexa\_Mi2008\_1\_21817\_hit1

5' UAGAUGAUGGGUUUAGAUGAU  
|||||:|||||  
AUCUACUACCCGAAUCUACUA 5'  
AT3G50480.1 925 945  
RPW8- like protein 4 (HR4)

SRNA\_AG01\_SoLexa\_Mi2008\_1\_10162\_hit2

5' CUAGAUGAUGGACUAGAUGA  
|||||  
GAUCUACUACCCGAAUCUACU 5'  
AT3G50480.1 926 946  
RPW8- like protein 4 (HR4)

SRNA\_AG01\_SoLexa\_Mi2008\_6\_10164\_hit27

5' CUAGAUGAUGGGCUUAGAUGA  
|||||  
GAUCUACUACCCGAAUCUACU 5'  
AT3G50480.1 926 946  
RPW8- like protein 4 (HR4)

SRNA\_AG01\_SoLexa\_Mi2008\_1\_32880\_hit27

5' UCUAGAUGAUGGGCUUAGAUGA  
|||||  
AGAUCUACUACCCGAAUCUACU 5'  
AT3G50480.1 926 947  
RPW8- like protein 4 (HR4)

leaves\_1sup\_AG01\_SoLexa\_Mi\_Cell\_2008\_hit\_target\_site.txt

SRNA\_AG01\_SoLexa\_Mi2008\_7\_10163\_hit27

5' CUAGAUGAUGGGCUUAGAUG  
|||||  
GAUCUACUACCCGAAUCUAC 5'  
AT3G50480.1 927 946  
RPW8- like protein 4 (HR4)

SRNA\_AG01\_SoLexa\_Mi2008\_2\_32879\_hit27

5' UCUAGAUGAUGGGCUUAGAUG  
|||||  
AGAUCUACUACCCGAAUCUAC 5'  
AT3G50480.1 927 947  
RPW8- like protein 4 (HR4)

SRNA\_AG01\_SoLexa\_Mi2008\_1\_20757\_hit22

5' UAGAAACAUCUAGAUGAUGGGCUU  
|||||  
AUCUUUGUAGAUCUACUACCCGAA 5'  
AT3G50480.1 932 955  
RPW8- like protein 4 (HR4)

SRNA\_AG01\_SoLexa\_Mi2008\_1\_19030\_hit3

5' UACAAACAUCUAGAUGAUGGGCU  
|| |||||  
AUCUUUGUAGAUCUACUACCCGA 5'  
AT3G50480.1 933 955  
RPW8- like protein 4 (HR4)

SRNA\_AG01\_SoLexa\_Mi2008\_5\_10081\_hit25

5' CUAGAAACAUCUAGAUGAUGG  
|||||  
GAUCUUUGUAGAUCUACUACC 5'  
AT3G50480.1 936 956  
RPW8- like protein 4 (HR4)

SRNA\_AG01\_SoLexa\_Mi2008\_4\_14880\_hit24

5' GGAGUACAAGGAAAGGGUA  
|||||  
CCUCAUGUCCUUUCCCAU 5'  
AT3G50480.1 962 980  
RPW8- like protein 4 (HR4)

SRNA\_AG01\_SoLexa\_Mi2008\_1\_23502\_hit2

5' UAGGUGUACAAGGAAAGGGUA  
|||| |||||  
AUCCUCAUGUCCUUUCCCAU 5'  
AT3G50480.1 962 982  
RPW8- like protein 4 (HR4)

SRNA\_AG01\_SoLexa\_Mi2008\_5\_24584\_hit2

5' UAUAGGUGUACAAGGAAAGGGU  
||||| |||||  
AUAUCCUCAUGUCCUUUCCCA 5'  
AT3G50480.1 963 984  
RPW8- like protein 4 (HR4)

SRNA\_AG01\_SoLexa\_Mi2008\_1\_22768\_hit2

5' UAGGAGUACAAGGAAAAGGGU  
||||| |||||  
AUCCUCAUGUCCUU-UCCCA 5'  
AT3G50480.1 964 983  
RPW8- like protein 4 (HR4)

leaves\_1sup\_AG01\_SoLexa\_Mi\_Cell\_2008\_hit\_target\_site.txt

SRNA\_AG01\_SoLexa\_Mi2008\_1\_2590\_hit4

5' AUAGGAGUACAAGGAAAAGG  
|||||  
UAUCCUCAUGUCCUU-UCC 5'  
AT3G50480.1 966 984  
RPW8- like protein 4 (HR4)

SRNA\_AG01\_SoLexa\_Mi2008\_1\_54542\_hit29

5' UUUUAUAGGAGUACAAGGAA  
|||||  
AAAUUAUCCUCAUGUCCUU 5'  
AT3G50480.1 968 988  
RPW8- like protein 4 (HR4)

SRNA\_AG01\_SoLexa\_Mi2008\_1\_21149\_hit1

5' UAG-AGAAAAAGGUAGGCAUGGG  
||| |||||  
AUCGUCUUUUC-AUCCGUACCG 5'  
AT3G50910.1 276 297  
unknown protein

SRNA\_AG01\_SoLexa\_Mi2008\_1\_13420\_hit2

5' GAAGAAGAAGAAGAC-UCUU  
|||||:| |||  
CUUCUUCUUCUUUUGGAGAA 5'  
AT3G50910.1 98 117  
unknown protein

SRNA\_AG01\_SoLexa\_Mi2008\_1\_35975\_hit2

5' UGAGAUGAGUGACCAUGGCUGU  
||||| || |||||:  
ACUCUACUAACCGGUACCGACG 5'  
AT3G50930.1 1239 1260  
BCS1 protein-like protein

SRNA\_AG01\_SoLexa\_Mi2008\_1\_24431\_hit2

5' UAUA-GACAUGUGGAUGAUGCAC  
||| |||||  
AUAUGCUGUACACCUAC-ACGUA 5'  
AT3G50930.1 1585 1606  
BCS1 protein-like protein

SRNA\_AG01\_SoLexa\_Mi2008\_6\_24430\_hit2

5' UAUA-GACAUGUGGAUGAUGCA  
||| |||||  
AUAUGCUGUACACCUAC-ACGU 5'  
AT3G50930.1 1586 1606  
BCS1 protein-like protein

SRNA\_AG01\_SoLexa\_Mi2008\_1\_24432\_hit1

5' UAUA-GACAUGUGGAUGAUGC  
||| ||||| |||:  
AUAUGCUGUACACCUAC-ACGU 5'  
AT3G50930.1 1586 1606  
BCS1 protein-like protein

SRNA\_AG01\_SoLexa\_Mi2008\_23\_6153\_hit2

5' CAGAUCUUGGUGG-UAG-UAGC  
||||| ||| |||  
GUCUAGAACCACCGAUCUAUCC 5'  
AT3G50930.1 671 692  
BCS1 protein-like protein

leaves\_1sup\_AG01\_SoLexa\_Mi\_Cell\_2008\_hit\_target\_site.txt

SRNA\_AG01\_SoLexa\_Mi2008\_2\_34202\_hit2

5' UGAA-ACUUUAAUUUAAUUAGU  
 ||||| ||||| |||||  
 ACUUAUGAAAAUAAAUAAUCC 5'  
 AT3G51590.1 431 452  
 lipid transfer protein-like protein

SRNA\_AG01\_SoLexa\_Mi2008\_1\_46987\_hit1

5' UUACCAUCAGACCUCAUACCUU  
 ||| ||||| |||||  
 AAUAGUUAGU--GGAGUAUGGAA 5'  
 AT3G52430.1 1452 1472  
 putative protein

SRNA\_AG01\_SoLexa\_Mi2008\_14\_5560\_hit17

5' CACCUGCUCAUCAACAACU  
 ||| | |||||  
 GUG-A-GAGUAGUUGUUGG 5'  
 AT3G52430.1 1788 1804  
 putative protein

SRNA\_AG01\_SoLexa\_Mi2008\_1\_52646\_hit1

5' UUGG-GGAUUGUUGUGGUUGUU  
 :||| ||||| |||||  
 GACCUCCUAACAACAACAACA 5'  
 AT3G52800.1 377 398  
 zinc finger like protein

SRNA\_AG01\_SoLexa\_Mi2008\_1\_49739\_hit1

5' UUCUCGACGUUGAUG-UGGCAAG  
 ||||| ||||| |||||  
 AAGAGCUGCAACUACGAGCGUUC 5'  
 AT3G52930.1 317 339  
 fructose biphosphate aldolase - like protein

SRNA\_AG01\_SoLexa\_Mi2008\_3\_13421\_hit1

5' GAAGAAGAAGAUGAUG-UUGAU  
 ||||| ||||| |||||  
 CUUCUUCUUCUACU-CGAACUC 5'  
 AT3G53810.1 61 81  
 serine/threonine-specific kinase like protein

SRNA\_AG01\_SoLexa\_Mi2008\_1\_22094\_hit1

5' UAGCAGCCUGACCAUACCAG  
 ||||| ||||| |||||  
 AUCGUCGGACUGGUAAUGGUC 5'  
 AT3G54150.1 197 217  
 embryonic abundant protein -like

SRNA\_AG01\_SoLexa\_Mi2008\_5\_427\_hit1

5' AAAGAUGUUGUC-GCUA-UGU  
 ||||| ||||| |||||  
 UUUCUACAACAGACGUUUA 5'  
 AT3G54640.1 1167 1187  
 tryptophan synthase alpha chain

SRNA\_AG01\_SoLexa\_Mi2008\_1\_53131\_hit2

5' UUGGUGUUGGU-GGUGUAAUGA  
 ||||| ||||| |||||  
 AACCACA-CCAACCACAUCACU 5'  
 AT3G54640.1 816 836  
 tryptophan synthase alpha chain

leaves\_1sup\_AG01\_SoLexa\_Mi\_Cell\_2008\_hit\_target\_site.txt

SRNA\_AG01\_SoLexa\_Mi2008\_1\_3\_hit25

5' AAAAAAA-AAAAAAGAAAGA  
 ||||| ||||| |||||  
 UUUUUUUUUUUUUUU-UUUUU 5'  
 AT3G54810.2 1506 1524  
 unknown protein

SRNA\_AG01\_SoLexa\_Mi2008\_1\_3\_hit25

5' AAAAAAAA-AAAAGAAAGA  
 ||||| ||| ||:|  
 UUUUUUUUUUUUU-UUUUU 5'  
 AT3G54810.2 1508 1526  
 unknown protein

SRNA\_AG01\_SoLexa\_Mi2008\_1\_3\_hit25

5' AAAAAAAAA-AAAGAAAGA  
 ||||| ||| ||:|  
 UUUUUUUUUUUUU-UUUUU 5'  
 AT3G54810.2 1509 1527  
 unknown protein

SRNA\_AG01\_SoLexa\_Mi2008\_1\_1776\_hit10

5' AGAAAAAAAAAAAA-AAAAAAAU  
 ||||| |||||  
 ACUUUUUUUUUUUUUUUUUU 5'  
 AT3G54810.2 1509 1530  
 unknown protein

SRNA\_AG01\_SoLexa\_Mi2008\_1\_3\_hit25

5' AAAAAAAAA-AGAAAGA  
 ||||| || ||:|  
 UUUUUUUUUUUUU-UUUUU 5'  
 AT3G54810.2 1510 1528  
 unknown protein

SRNA\_AG01\_SoLexa\_Mi2008\_1\_3\_hit25

5' AAAAAAA-AAAAAAGAAAGA  
 ||||| ||||| |||||  
 UUUUUUUUUUUUU-UUUUU 5'  
 AT3G54810.1 1587 1605  
 unknown protein

SRNA\_AG01\_SoLexa\_Mi2008\_1\_3\_hit25

5' AAAAAAAA-AAAAGAAAGA  
 ||||| ||| ||:|  
 UUUUUUUUUUUUU-UUUUU 5'  
 AT3G54810.1 1589 1607  
 unknown protein

SRNA\_AG01\_SoLexa\_Mi2008\_1\_3\_hit25

5' AAAAAAAAA-AAAGAAAGA  
 ||||| ||| ||:|  
 UUUUUUUUUUUUU-UUUUU 5'  
 AT3G54810.1 1590 1608  
 unknown protein

SRNA\_AG01\_SoLexa\_Mi2008\_1\_1776\_hit10

5' AGAAAAAAAAAAAA-AAAAAAAU  
 ||||| |||||  
 ACUUUUUUUUUUUUUUUUUU 5'  
 AT3G54810.1 1590 1611  
 unknown protein

leaves\_1sup\_AG01\_SoLexa\_Mi\_Cell\_2008\_hit\_target\_site.txt

SRNA\_AG01\_SoLexa\_Mi2008\_1\_3\_hit25

5' AAAAAAAAAA-AAGAAAGA  
 |||:|  
 UUUUUUUUUUCUU-UUUUU 5'  
 AT3G54810.1 1591 1609  
 unknown protein

SRNA\_AG01\_SoLexa\_Mi2008\_1\_34602\_hit1

5' UGAAGAGUGAUUGAUUGGAA  
 |||  
 ACUUCUCACUAACUAACCCUU 5'  
 AT3G54810.2 20 40  
 unknown protein

SRNA\_AG01\_SoLexa\_Mi2008\_1\_17855\_hit2

5' UAAGAGCUCAGGUGAAGAAU  
 |||  
 UAUCUCGAGUCCACUACUUA 5'  
 AT3G54810.2 398 417  
 unknown protein

SRNA\_AG01\_SoLexa\_Mi2008\_1\_17855\_hit2

5' UAAGAGCUCAGGUGAAGAAU  
 |||  
 UAUCUCGAGUCCACUACUUA 5'  
 AT3G54810.1 479 498  
 unknown protein

SRNA\_AG01\_SoLexa\_Mi2008\_3\_768\_hit1

5' AAGAAGAGAGAGAAUUGAG  
 |||  
 UUCUUCUCUCUC-UAACGA 5'  
 AT3G54810.2 82 99  
 unknown protein

SRNA\_AG01\_SoLexa\_Mi2008\_1\_50638\_hit1

5' UUGAGGACAAAAGAG-GGAAA  
 |||  
 AACUCCUUUUUCUCUCCUUU 5'  
 AT3G55050.1 1582 1602  
 protein phosphatase 2C - like protein

SRNA\_AG01\_SoLexa\_Mi2008\_1\_50638\_hit1

5' UUGAGGACAAAAGAG-GGAAA  
 |||  
 AACUCCUUUUUCUCUCCUUU 5'  
 AT3G55050.2 1699 1719  
 protein phosphatase 2C - like protein

SRNA\_AG01\_SoLexa\_Mi2008\_1\_51840\_hit3

5' UUGCUGAAGAUGGUGUUGAUGC  
 |||  
 AACAAUUAACCAACUACC 5'  
 AT3G55560.1 281 302  
 unknown protein

SRNA\_AG01\_SoLexa\_Mi2008\_1\_19482\_hit1

5' UACAGGGAAAGCAGU-CAUGCU  
 |||  
 AUGUCCUUUCGUCACGU-CGA 5'  
 AT3G55605.1 562 582  
 unknown protein

leaves\_1sup\_AG01\_SoLexa\_Mi\_Cell\_2008\_hit\_target\_site.txt

SRNA\_AG01\_SoLexa\_Mi2008\_1\_394\_hit4

5' AAAGAGGAAGAUAG-GACGCAU  
 |||  
 UUCUCCUUCUAUCUCU-CGUU 5'  
 AT3G55840.1 1587 1607  
 nematode resistance protein-like protein

SRNA\_AG01\_SoLexa\_Mi2008\_1\_4082\_hit2

5' CAAAGAGGAAGAUAG-GACGCA  
 |||  
 GUUUCUCCUUCUAUCUCU-CGU 5'  
 AT3G55840.1 1588 1608  
 nematode resistance protein-like protein

SRNA\_AG01\_SoLexa\_Mi2008\_1\_393\_hit4

5' AAAGAGGAAGAUAG-GACGC  
 |||  
 UUCUCCUUCUAUCUCU-CG 5'  
 AT3G55840.1 1589 1607  
 nematode resistance protein-like protein

SRNA\_AG01\_SoLexa\_Mi2008\_1\_5113\_hit1

5' CAAUCCGAGAGAUUCGA-UGUCC  
 |||  
 GUUAGGCUCUCUAAGCUGACACC 5'  
 AT3G55980.1 1623 1645  
 unknown protein

SRNA\_AG01\_SoLexa\_Mi2008\_1\_42480\_hit1

5' UGGG-GGUUGAUGAUCCGAUGG  
 |||  
 CCCCUCCAACUACUAGG-UACC 5'  
 AT3G56200.1 118 138  
 unknown protein

SRNA\_AG01\_SoLexa\_Mi2008\_1\_54251\_hit1

5' UUUAGAGGUGACCAUUAGAGUA  
 |||  
 AAUUCUCCACU-GU-UUCUCAU 5'  
 AT3G56260.1 118 137  
 unknown protein

SRNA\_AG01\_SoLexa\_Mi2008\_1\_2092\_hit5

5' AGCUC-AAGAAAUGCG-CCUCC  
 |||  
 UCGAGGUUCUUUACGCAGGAGU 5'  
 AT3G56400.1 429 451  
 putative DNA-binding protein

SRNA\_AG01\_SoLexa\_Mi2008\_3\_12720\_hit1

5' CUUGAAACAGGAGAUAGAGUUU  
 |||  
 GAACUUUGGCCUCUA-C-CAAA 5'  
 AT3G56710.1 109 128  
 SigA binding protein

SRNA\_AG01\_SoLexa\_Mi2008\_6\_28221\_hit36

5' UCAGAUGUUUACAUGUGUCA  
 |||  
 AGUCUACAAAUAUACACACA 5'  
 AT3G56710.1 16 35  
 SigA binding protein

leaves\_1sup\_AG01\_Solexa\_Mi\_Cell\_2008\_hit\_target\_site.txt

SRNA\_AG01\_Solexa\_Mi2008\_5\_1114\_hit1  
5' AAUG-GAACUAGUGGACAAACAA  
    ||||| ||||||||| |||||  
    UUACUCUUGAUCACCUAUUUUGUG 5'  
AT3G56970.1      840      862  
putative bHLH transcription factor (bHLH038)

SRNA\_AG01\_Solexa\_Mi2008\_1\_22326\_hit1  
5' UAGCGAGGAAAUUGUUGGU  
    ||||| ||||||||| |||||  
    AUCGCUCCUUUAACAACCA 5'  
AT3G57120.1      530      548  
unknown protein

SRNA\_AG01\_Solexa\_Mi2008\_6\_11244\_hit6  
5' CUCUGAACCACAACG-CUUU  
    ||||| ||||||| |||:  
    GAGACUUUGUGUUGCUGAAG 5'  
AT3G57120.1      606      625  
unknown protein

SRNA\_AG01\_Solexa\_Mi2008\_1\_48516\_hit1  
5' UUCAAGGAAGAUUGGACCAGU  
    ||||| ||||||| |||:  
    AAGUCCUUCUAACC-GGUUA 5'  
AT3G57170.1      1048      1067  
unknown protein

SRNA\_AG01\_Solexa\_Mi2008\_2\_13688\_hit1  
5' GACCAUUUGUGAGAAGAGA  
    ||||| ||||||||| |||||  
    CUGGUAAACACUCUUCUCU 5'  
AT3G57230.2      585      603  
MADS-box transcription factor (AGL16)

SRNA\_AG01\_Solexa\_Mi2008\_596\_13689\_hit1  
5' GACCAUUUGUGAGAAGGGA  
    ||||| ||||||||| |||:  
    CUGGUAAACACUCUUCUCU 5'  
AT3G57230.2      585      603  
MADS-box transcription factor (AGL16)

SRNA\_AG01\_Solexa\_Mi2008\_72\_1853\_hit1  
5' AGACCAUUUGUGAGAAGGGA  
    ||||| ||||||||| |||:  
    UCUGGUAAACACUCUUCUCU 5'  
AT3G57230.2      585      604  
MADS-box transcription factor (AGL16)

SRNA\_AG01\_Solexa\_Mi2008\_3321\_21060\_hit1  
5' UAGACCAUUUGUGAGAAGGGA  
    ||||| ||||||||| |||:  
    AUCUGGUAAACACUCUUCUCU 5'  
AT3G57230.2      585      605  
MADS-box transcription factor (AGL16)

SRNA\_AG01\_Solexa\_Mi2008\_2\_10113\_hit1  
5' CUAGACCAUUUGUGAGAAGGGA  
    ||||| ||||||||| |||:  
    GAUCUGGUAAACACUCUUCUCU 5'  
AT3G57230.2      585      606  
MADS-box transcription factor (AGL16)

leaves\_1sup\_AG01\_SoLexa\_Mi\_Cell\_2008\_hit\_target\_site.txt

SRNA\_AG01\_SoLexa\_Mi2008\_32\_21059\_hit1  
5' UAGACCAUUUGUGAGAAGGG  
|||||||:|  
AUCUGGUAACACUCUUCUC 5'  
AT3G57230.2 586 605  
MADS-box transcription factor (AGL16)

SRNA\_AG01\_SoLexa\_Mi2008\_37\_21058\_hit1  
5' UAGACCAUUUGUGAGAAGG  
|||||||:  
AUCUGGUAACACUCUUCU 5'  
AT3G57230.2 587 605  
MADS-box transcription factor (AGL16)

SRNA\_AG01\_SoLexa\_Mi2008\_2\_13688\_hit1  
5' GACCAUUUGUGAGAAGAGA  
|||||||  
CUGGUAACACUCUUCUCU 5'  
AT3G57230.1 588 606  
MADS-box transcription factor (AGL16)

SRNA\_AG01\_SoLexa\_Mi2008\_596\_13689\_hit1  
5' GACCAUUUGUGAGAAGGGA  
|||||||:|  
CUGGUAACACUCUUCUCU 5'  
AT3G57230.1 588 606  
MADS-box transcription factor (AGL16)

SRNA\_AG01\_SoLexa\_Mi2008\_72\_1853\_hit1  
5' AGACCAUUUGUGAGAAGGGA  
|||||||:|  
UCUGGUAACACUCUUCUCU 5'  
AT3G57230.1 588 607  
MADS-box transcription factor (AGL16)

SRNA\_AG01\_SoLexa\_Mi2008\_3321\_21060\_hit1  
5' UAGACCAUUUGUGAGAAGGGA  
|||||||:|  
AUCUGGUAACACUCUUCUCU 5'  
AT3G57230.1 588 608  
MADS-box transcription factor (AGL16)

SRNA\_AG01\_SoLexa\_Mi2008\_2\_10113\_hit1  
5' CUAGACCAUUUGUGAGAAGGGA  
|||||||:|  
GAUCUGGUAACACUCUUCUCU 5'  
AT3G57230.1 588 609  
MADS-box transcription factor (AGL16)

SRNA\_AG01\_SoLexa\_Mi2008\_32\_21059\_hit1  
5' UAGACCAUUUGUGAGAAGGG  
|||||||:|  
AUCUGGUAACACUCUUCUC 5'  
AT3G57230.1 589 608  
MADS-box transcription factor (AGL16)

SRNA\_AG01\_SoLexa\_Mi2008\_37\_21058\_hit1  
5' UAGACCAUUUGUGAGAAGG  
|||||||:  
AUCUGGUAACACUCUUCU 5'  
AT3G57230.1 590 608  
MADS-box transcription factor (AGL16)

leaves\_1sup\_AG01\_SoLexa\_Mi\_Cell\_2008\_hit\_target\_site.txt

SRNA\_AG01\_SoLexa\_Mi2008\_15\_2751\_hit1

5' AUCAAAAUCUG-UGGUGAGGCU  
||||| || || |||||  
UAGUUGUA-ACCACCACUCCGA 5'  
AT3G57260.1 58 78  
beta-1,3-glucanase 2 (BG2)

SRNA\_AG01\_SoLexa\_Mi2008\_1\_40423\_hit1

5' UGGAGCCUGCACUGGUACU  
|| ||||| ||||| ||  
CCC-CGGACGUGACCA-GA 5'  
AT3G57410.1 1596 1612  
villin 3

SRNA\_AG01\_SoLexa\_Mi2008\_5\_349\_hit1

5' AAAGAACAAUGGCAGCGAGU  
||||| ||||| |||||  
GUUCUUGUUACCGU--CUCA 5'  
AT3G57550.2 575 592  
guanylate kinase (GK-2)

SRNA\_AG01\_SoLexa\_Mi2008\_2\_40296\_hit2

5' UG-GAGAGUUCAUCAGAGA-UU  
|| ||||| ||||| ||  
ACUCUCUCAAGUAGUCUCUCAA 5'  
AT3G58270.2 281 302  
unknown protein

SRNA\_AG01\_SoLexa\_Mi2008\_2\_40296\_hit2

5' UG-GAGAGUUCAUCAGAGA-UU  
|| ||||| ||||| ||  
ACUCUCUCAAGUAGUCUCUCAA 5'  
AT3G58270.1 307 328  
unknown protein

SRNA\_AG01\_SoLexa\_Mi2008\_1\_5432\_hit1

5' CACCAAUGCUUUCUCUAUCUU  
||| || ||||| |||||  
GUG-UU-CGAAAGAGAUAGAC 5'  
AT3G58660.1 605 623  
putative protein

SRNA\_AG01\_SoLexa\_Mi2008\_1\_14019\_hit1

5' GAGCUCCUUGAAGUCAAUG  
||| ||||| ||||| ||  
CUCAAGGAACUUCAAGUCC 5'  
AT3G58780.2 697 716  
shatterproof 1 (SHP1)/ agamous -like 1 (AGL1)

SRNA\_AG01\_SoLexa\_Mi2008\_271\_14020\_hit1

5' GAGCUCCUUGAAGUCAAUGG  
||| ||||| ||||| ||  
CUCAAGGAACUUCAAGUU-CC 5'  
AT3G58780.2 698 717  
shatterproof 1 (SHP1)/ agamous -like 1 (AGL1)

SRNA\_AG01\_SoLexa\_Mi2008\_1\_14019\_hit1

5' GAGCUCCUUGAAGUCAAUG  
||| ||||| ||||| ||  
CUCAAGGAACUUCAAGUCC 5'  
AT3G58780.1 718 737  
shatterproof 1 (SHP1)/ agamous -like 1 (AGL1)

leaves\_1sup\_AG01\_SoLexa\_Mi\_Cell\_2008\_hit\_target\_site.txt

SRNA\_AG01\_SoLexa\_Mi2008\_271\_14020\_hit1  
5' GAGCUCCUUGAAGUUCAAUGG  
||| |||||||||||||||| ||  
CUCAAGGAACUUCAAGUU-CC 5'  
AT3G58780.1 719 738  
shatterproof 1 (SHP1)/ agamous -like 1 (AGL1)

SRNA\_AG01\_SoLexa\_Mi2008\_1\_1059\_hit1  
5' AAUGAAAGUAGAGAGA-GCU  
||| |||||||||||||||| ||  
UUAUUUCAUCUCUCUUCGC 5'  
AT3G59320.2 120 139  
anthocyanin-related membrane protein 2 (Anm2)

SRNA\_AG01\_SoLexa\_Mi2008\_2\_15803\_hit1  
5' GUCUGAGAAAAUUACCCAU  
||| ||||||||||||:| ||||  
CAGACUCUUUUGAU-GGUA 5'  
AT3G59320.1 433 450  
anthocyanin-related membrane protein 2 (Anm2)

SRNA\_AG01\_SoLexa\_Mi2008\_2\_15803\_hit1  
5' GUCUGAGAAAAUUACCCAU  
||| ||||||||||||:| ||||  
CAGACUCUUUUGAU-GGUA 5'  
AT3G59320.2 591 608  
anthocyanin-related membrane protein 2 (Anm2)

SRNA\_AG01\_SoLexa\_Mi2008\_1\_1059\_hit1  
5' AAUGAAAGUAGAGAG-AGCU  
||| |||||||||||||||| |||  
UUAUUUCAUCUCUCUUCGC 5'  
AT3G59320.1 74 93  
anthocyanin-related membrane protein 2 (Anm2)

SRNA\_AG01\_SoLexa\_Mi2008\_2\_17207\_hit1  
5' UAACACCACCAAGACUCCU  
:|||| ||||||||||||||||  
GUUGUUGUGGUUCUGAGGU 5'  
AT3G59520.1 450 468  
unknown protein

SRNA\_AG01\_SoLexa\_Mi2008\_1\_11291\_hit2  
5' CUCUUAUCCAAGGGUUAUUUC  
||| |||||||||||||||| |||  
AAGAAUAGGUUCCCAACAAAC 5'  
AT3G59530.2 1067 1087  
unknown protein

SRNA\_AG01\_SoLexa\_Mi2008\_1\_11291\_hit2  
5' CUCUUAUCCAAGGGUUAUUUC  
||| |||||||||||||||| |||  
AAGAAUAGGUUCCCAACAAAC 5'  
AT3G59530.1 1131 1151  
unknown protein

SRNA\_AG01\_SoLexa\_Mi2008\_1\_19370\_hit1  
5' UACAGAGAGAUGAUGUU-GUUC  
||| |||||||||||||||| ||| ||||  
AUGUCUCUCUACUA-AAUCAAG 5'  
AT3G59530.2 1320 1340  
unknown protein

leaves\_1sup\_AG01\_SoLexa\_Mi\_Cell\_2008\_hit\_target\_site.txt

SRNA\_AG01\_SoLexa\_Mi2008\_1\_19370\_hit1

5' UACAGAGAGAUGAUGUU-GUUC  
| | | | | | | | | | | | | | | | | |  
AUGUCUCUCUACUA-AAUCAAG 5'  
AT3G59530.1 1384 1404  
unknown protein

SRNA\_AG01\_SoLexa\_Mi2008\_4\_7308\_hit1

5' CAUGGU-CCACCGAAAAUGU  
| | | | | | | | | | | | | | | | | |  
GUACAAUGGUGGCUUUUACA 5'  
AT3G59530.2 437 456  
unknown protein

SRNA\_AG01\_SoLexa\_Mi2008\_4\_7308\_hit1

5' CAUGGU-CCACCGAAAAUGU  
| | | | | | | | | | | | | | | | | |  
GUACAAUGGUGGCUUUUACA 5'  
AT3G59530.1 501 520  
unknown protein

SRNA\_AG01\_SoLexa\_Mi2008\_1\_812\_hit1

5' AAGAGGAGGA-AGCAUUGUUCUU  
| | | | | | | | | | | | | | | | | |  
UUCUCCUCCUUUC-UAACCAGAA 5'  
AT3G59530.2 873 894  
unknown protein

SRNA\_AG01\_SoLexa\_Mi2008\_1\_812\_hit1

5' AAGAGGAGGA-AGCAUUGUUCUU  
| | | | | | | | | | | | | | | | | |  
UUCUCCUCCUUUC-UAACCAGAA 5'  
AT3G59530.1 937 958  
unknown protein

SRNA\_AG01\_SoLexa\_Mi2008\_10\_35767\_hit2

5' UGAGAAAGAUGAGAUCA  
| | | | | | | | | | | | | | | | | |  
ACUCUUUCUACUCUACUGU 5'  
AT3G59700.1 216 234  
serine/threonine-specific kinase lecRK1 precursor,lectin receptor-like

SRNA\_AG01\_SoLexa\_Mi2008\_1\_23362\_hit3

5' UAGGUUAUA-ACUAUGUUGGUUGUU  
| | | | | | | | | | | | | | | | | |  
AUCCAUUUGUGAAACAACCAACAA 5'  
AT3G60070.1 1408 1431  
unknown protein

SRNA\_AG01\_SoLexa\_Mi2008\_1\_18400\_hit1

5' UAAGGUUCGUUGAUUGUUGUC  
| | | | | | | | | | | | | | | | | |  
AUUCCAAGCAACUAACAACAG 5'  
AT3G60140.1 647 667  
beta-glucosidase

SRNA\_AG01\_SoLexa\_Mi2008\_1\_24287\_hit1

5' UAUAAGGUUCGUUGAUUGUUGUC  
| | | | | | | | | | | | | | | | | |  
AUUCCAAGCAACUAACAACAG 5'  
AT3G60140.1 647 669  
beta-glucosidase

leaves\_1sup\_AG01\_SoLexa\_Mi\_Cell\_2008\_hit\_target\_site.txt

SRNA\_AG01\_SoLexa\_Mi2008\_7\_13212\_hit6  
 5' CUUUGCCAUCUUUUUGAGAG  
 ||| ||||| ||| |||  
 AAAACGGUAGA-AAAC-CUC 5'  
 AT3G60420.2 686 703  
 unknown protein

SRNA\_AG01\_SoLexa\_Mi2008\_1\_50433\_hit1  
 5' UU-GACUCACCGUGACGCAUUA  
 || || ||||| ||||| |||  
 AAGCU-AGUGGCACUGCGUACU 5'  
 AT3G60450.1 75 95  
 unknown protein

SRNA\_AG01\_SoLexa\_Mi2008\_2\_35370\_hit1  
 5' UGAC-CAGAUCCCAUCUGUGUA  
 | || || ||||| ||||| |||  
 AAUGAGU-UAGGGUAGACACAU 5'  
 AT3G60680.1 628 648  
 unknown protein

SRNA\_AG01\_SoLexa\_Mi2008\_1\_7416\_hit27  
 5' CAUG-UUUGGGAUGCAUUUGGA  
 ||| ||||| ||||| |||||  
 UUACGAAACC-UACGUAAACCU 5'  
 AT3G60680.1 99 119  
 unknown protein

SRNA\_AG01\_SoLexa\_Mi2008\_2\_12536\_hit1  
 5' CUUAUUGAUUCGAUGUG-UUU  
 ||||| ||||| || |||  
 UAAUAACUAAGCUA-ACUAAA 5'  
 AT3G61170.1 666 685  
 putative protein

SRNA\_AG01\_SoLexa\_Mi2008\_2\_32161\_hit1  
 5' UCGGGUCGGGUACGAUGUGUA  
 ||||| ||||| ||||| |||||  
 AGCCCAGCCCAUGCUACACAU 5'  
 AT3G61460.1 224 244  
 RING finger protein

SRNA\_AG01\_SoLexa\_Mi2008\_60\_9189\_hit1  
 5' CGGGUAAUUCGGGUCGAGUA  
 ||||| ||||| |||  
 GCCCAUAAGCCCAGCCCAU 5'  
 AT3G61460.1 233 251  
 RING finger protein

SRNA\_AG01\_SoLexa\_Mi2008\_1\_54911\_hit1  
 5' UUUCGGGUAUUCGGGUCGGGUA  
 ||||| ||||| ||||| |||||  
 AAAGCCCAUAAGCCCAGCCCAU 5'  
 AT3G61460.1 233 254  
 RING finger protein

SRNA\_AG01\_SoLexa\_Mi2008\_16\_36152\_hit1  
 5' UGAGCGGGUUUCGGGUAUUCG  
 ||||| ||||| ||||| |||||  
 ACUCGCCCAAAGCCCAUAAGC 5'  
 AT3G61460.1 242 262  
 RING finger protein

leaves\_1sup\_AG01\_SoLexa\_Mi\_Cell\_2008\_hit\_target\_site.txt

SRNA\_AG01\_SoLexa\_Mi2008\_3\_8682\_hit1

5' CGAGU-UUCUACAGAGUGGACA  
|| || |||||:|||||  
GC-CACAAGAUGUUUACCCUGU 5'  
AT3G61460.1 468 488  
RING finger protein

SRNA\_AG01\_SoLexa\_Mi2008\_1\_30383\_hit1

5' UCGAAAGGGCCAAACCUGUGA  
||||| ||||| |||  
AGCUUCCAGGUUUGGA-ACU 5'  
AT3G61630.1 1243 1262  
unknown protein

SRNA\_AG01\_SoLexa\_Mi2008\_2\_38647\_hit1

5' UGCCGUAGACGUUGUUGUUG  
|||| |||||  
CAGGCA-CUGCAACAACAAC 5'  
AT3G61630.1 241 259  
unknown protein

SRNA\_AG01\_SoLexa\_Mi2008\_99\_5812\_hit1

5' CACUGG-UCGACGGAUCUCUA  
|| || |||||  
UUG-CCGAGCUGCCUAGAGAU 5'  
AT3G61630.1 454 473  
unknown protein

SRNA\_AG01\_SoLexa\_Mi2008\_4\_15860\_hit3

5' GUGAGAGCUUUAGGU--UUUGA  
|||| ||||| |||||  
CACUCGCGAAAUCCAGGAAACU 5'  
AT3G61630.1 546 567  
unknown protein

SRNA\_AG01\_SoLexa\_Mi2008\_28\_14484\_hit1

5' GCAGUGGUGCGGUUACUCAG  
||||| |||| |||||:  
CGUCACCACCGC-AAU-AGUU 5'  
AT3G62130.1 386 404  
unknown protein

SRNA\_AG01\_SoLexa\_Mi2008\_1\_16782\_hit1

5' UAAAGCU-CCAGGACCGGAUGGU  
||||| |||| |||||  
CUUUCGAAGGUC-UGGCCUACCA 5'  
AT3G62260.2 405 426  
unknown protein

SRNA\_AG01\_SoLexa\_Mi2008\_1\_16782\_hit1

5' UAAAGCU-CCAGGACCGGAUGGU  
||||| |||| |||||  
CUUUCGAAGGUC-UGGCCUACCA 5'  
AT3G62260.1 416 437  
unknown protein

SRNA\_AG01\_SoLexa\_Mi2008\_4\_11360\_hit1

5' CUGAA-CUCCGAGUCCGAUUGAU  
|||| | ||||| ||||| |:  
GACUUAGAGGCUCAGGCUAAGUG 5'  
AT3G62370.1 116 138  
unknown protein (At3g62370)

leaves\_1sup\_AG01\_SoLexa\_Mi\_Cell\_2008\_hit\_target\_site.txt

SRNA\_AG01\_SoLexa\_Mi2008\_2\_8781\_hit1

5' CGCCAACACUACAACCACGAG  
||||| | ||||||||||||||||  
ACGGU-GCGAUGUUGGUGCUC 5'  
AT3G62370.1 40 59  
unknown protein (At3g62370)

SRNA\_AG01\_SoLexa\_Mi2008\_3\_27777\_hit1

5' UCAC-GAAGACGGAUGAUGGCA  
||||| || ||||||||||||||||  
AGUGACU-CUGCCUACUACCGA 5'  
AT3G62700.1 1025 1045  
ABC transporter-like protein

SRNA\_AG01\_SoLexa\_Mi2008\_1\_29196\_hit2

5' UCCAAAGGGAUCGCAUUGUUU  
|||||||||||||||||||:|  
AGGUUCCCUAGCGUAACAGA 5'  
AT3G62980.1 1710 1730  
transport inhibitor response 1 (TIR1)

SRNA\_AG01\_SoLexa\_Mi2008\_1\_29193\_hit2

5' UCCAAAGGGAUCGCAUUGAU  
|||||||||||||||||||:  
AGGUUCCCUAGCGUAACAG 5'  
AT3G62980.1 1711 1730  
transport inhibitor response 1 (TIR1)

SRNA\_AG01\_SoLexa\_Mi2008\_14\_29195\_hit2

5' UCCAAAGGGAUCGCAUUGAUCC  
||||||||||||||||||| ||  
AGGUUCCCUAGCGUAAC-AGA 5'  
AT3G62980.1 1711 1731  
transport inhibitor response 1 (TIR1)

SRNA\_AG01\_SoLexa\_Mi2008\_23\_29194\_hit2

5' UCCAAAGGGAUCGCAUUGAUC  
||||||||||||||||||| ||  
AGGUUCCCUAGCGUAAC-AG 5'  
AT3G62980.1 1712 1731  
transport inhibitor response 1 (TIR1)

SRNA\_AG01\_SoLexa\_Mi2008\_2\_36207\_hit1

5' UGAGCUUGAUGGUUAUAUGAA  
||||||||||||||||||||||  
ACUCGAACUACCAUAUACUU 5'  
AT3G62980.1 2092 2112  
transport inhibitor response 1 (TIR1)

SRNA\_AG01\_SoLexa\_Mi2008\_1\_39228\_hit1

5' UGCUCAUGAGCUUGAUGGUUA  
||||||||||||||||||||||  
ACGAGUACUCGAACUACCAAU 5'  
AT3G62980.1 2098 2118  
transport inhibitor response 1 (TIR1)

SRNA\_AG01\_SoLexa\_Mi2008\_7\_33390\_hit1

5' UCUGAGACGAGGCGUGGGUGG  
||||||||||||||||||| |  
AGACUCUGCUCGCACCCCGC 5'  
AT3G63090.1 543 563  
unknown protein

leaves\_1sup\_AG01\_SoLexa\_Mi\_Cell\_2008\_hit\_target\_site.txt

SRNA\_AG01\_SoLexa\_Mi2008\_1\_34710\_hit1

5' UGAAGGAACAUGGUACA-GAAG  
 |||  
 ACUCCUUGUACC-UCUACUUC 5'  
 AT4G00300.1 59 79  
 null

SRNA\_AG01\_SoLexa\_Mi2008\_6\_37023\_hit2

5' UGAUCAAGAAGACGA-G-UGGCC  
 |||  
 ACUAGUUCUUCUGCUGCUACCGA 5'  
 AT4G00300.1 81 103  
 null

SRNA\_AG01\_SoLexa\_Mi2008\_1\_46662\_hit2

5' UUAAGUGGAAAUGUGGUAUGA  
 |||  
 CAUUCACCUUUACACC-U-CU 5'  
 AT4G00335.2 887 905  
 RING-H2 finger protein RHB1a

SRNA\_AG01\_SoLexa\_Mi2008\_1\_46662\_hit2

5' UUAAGUGGAAAUGUGGUAUGA  
 |||  
 CAUUCACCUUUACACC-U-CU 5'  
 AT4G00335.1 917 935  
 RING-H2 finger protein RHB1a

SRNA\_AG01\_SoLexa\_Mi2008\_1\_46662\_hit2

5' UUAAGUGGAAAUGUGGUAUGA  
 |||  
 CAUUCACCUUUACACC-U-CU 5'  
 AT4G00335.3 919 937  
 RING-H2 finger protein RHB1a

SRNA\_AG01\_SoLexa\_Mi2008\_1\_13417\_hit1

5' GAAGAAAUAGA-UGGUAUAGU  
 |||  
 CUUCUUUUAU-UGACCCUUAUCA 5'  
 AT4G00755.2 1241 1261  
 putative F-box protein

SRNA\_AG01\_SoLexa\_Mi2008\_3\_768\_hit1

5' AAGA-AGAGAGAGAAUUGAG  
 |||  
 UUCUGU-UCUCUCUUAACUA 5'  
 AT4G00755.2 132 150  
 putative F-box protein

SRNA\_AG01\_SoLexa\_Mi2008\_1\_13417\_hit1

5' GAAGAAAUAGA-UGGUAUAGU  
 |||  
 CUUCUUUUAU-UGACCCUUAUCA 5'  
 AT4G00755.1 1377 1397  
 putative F-box protein

SRNA\_AG01\_SoLexa\_Mi2008\_3\_768\_hit1

5' AAGA-AGAGAGAGAAUUGAG  
 |||  
 UUCUGU-UCUCUCUUAACUA 5'  
 AT4G00755.1 268 286  
 putative F-box protein

leaves\_1sup\_AG01\_SoLexa\_Mi\_Cell\_2008\_hit\_target\_site.txt

SRNA\_AG01\_SoLexa\_Mi2008\_2\_52709\_hit1

5' UUGGGGUGCUCUAUGAUCUAC  
|||  
AACCCACGAGUACUAGUAUG 5'  
AT4G00940.1 714 734  
putative protein

SRNA\_AG01\_SoLexa\_Mi2008\_1\_3079\_hit472

5' AUGAUGAUGAUGA-UGAUGAUGA  
||| |  
UACUACUACUA-UGACUACUACC 5'  
AT4G00940.1 91 112  
putative protein

SRNA\_AG01\_SoLexa\_Mi2008\_6\_14255\_hit369

5' GAUGAUGAUGAUGAUGA-UGAUGAU  
||| |  
CUAGUACUACUACUA-UGACUACUA 5'  
AT4G00940.1 93 116  
putative protein

SRNA\_AG01\_SoLexa\_Mi2008\_1\_3079\_hit472

5' AUGAUGAUGAUGAUGAUGA-UGA  
||| |  
UACUAGUACUACUACUA-UGACU 5'  
AT4G00940.1 97 118  
putative protein

SRNA\_AG01\_SoLexa\_Mi2008\_1\_44627\_hit1

5' UGUCCCUCCGCACUUCAGACC  
|||  
ACAGGGAGGCGUGAAGUCUGG 5'  
AT4G01000.1 1265 1285  
putative protein

SRNA\_AG01\_SoLexa\_Mi2008\_1\_23079\_hit1

5' UAGGGCAAAAUGGUGGACU-UG  
: ||| |  
GUCCCGUUUUACCACCU-AUAC 5'  
AT4G01120.1 378 398  
G-box binding bZip transcription factor GBF2 / AtbZip54

SRNA\_AG01\_SoLexa\_Mi2008\_19\_34341\_hit1

5' UGAACACCAGGAUAGUAGCAC  
||| |  
ACUUGUGGUCCUA-C-UCGUA 5'  
AT4G01120.1 411 429  
G-box binding bZip transcription factor GBF2 / AtbZip54

SRNA\_AG01\_SoLexa\_Mi2008\_9\_14254\_hit8

5' GAUGAUGAUGAUGAUGAUCUU  
||| |  
CUA-UACUACUACUACUAGGU 5'  
AT4G01360.1 719 738  
unknown protein

SRNA\_AG01\_SoLexa\_Mi2008\_1\_36323\_hit13

5' UGAGGAUGAUGAUGAUGAUGA  
: ||| |  
GCUC-UA-UACUACUACUACU 5'  
AT4G01360.1 723 741  
unknown protein

leaves\_1sup\_AG01\_SoLexa\_Mi\_Cell\_2008\_hit\_target\_site.txt

SRNA\_AG01\_SoLexa\_Mi2008\_1\_44646\_hit1

5' UGUCCUAAACGAAGCGGUGGU  
|||||  
ACAGGAUUUGCUUCGCCACCA 5'

AT4G01410.1 538 558  
putative hypersensitive response protein

SRNA\_AG01\_SoLexa\_Mi2008\_31\_7103\_hit13

5' CAUGAACGUUUGUUGUGUC  
|||||  
GUACUUGCAAUCAACACCG 5'

AT4G01430.1 300 318  
unknown protein

SRNA\_AG01\_SoLexa\_Mi2008\_1\_30942\_hit3

5' UCGAGUGAAGUGGUCUGGUCG  
|||  
AGC-CACUUCACCAGAACAGA 5'

AT4G01840.1 381 400  
potassium channel like protein

SRNA\_AG01\_SoLexa\_Mi2008\_1\_3079\_hit472

5' AUGAUGAUGAUGAUGAUGAUGA  
|||||  
UACUACUACCACAACUACG 5'

AT4G01840.1 795 816  
potassium channel like protein

SRNA\_AG01\_SoLexa\_Mi2008\_6\_14255\_hit369

5' GAUGAUGAUGAUGAUGAUGAUGA  
|||||  
AUACUACUACUACCACAACUACUA 5'

AT4G01840.1 797 820  
potassium channel like protein

SRNA\_AG01\_SoLexa\_Mi2008\_1\_3079\_hit472

5' AUGAUGAUGAUGAUGAUGAUGA  
|||||  
UACUACUACUACCACAACUACU 5'

AT4G01840.1 798 819  
potassium channel like protein

SRNA\_AG01\_SoLexa\_Mi2008\_1\_27297\_hit1

5' UCAA-GUAGCUUAUGUUUGGAG  
||||  
AGUUGCAUCGAACACAAACCUC 5'

AT4G04490.1 107 128  
putative receptor-like protein kinase

SRNA\_AG01\_SoLexa\_Mi2008\_1\_13589\_hit1

5' GACAAGAGUAAGAC-UCUAU  
|||||  
GUGUUCUCAUUCUGAAG-UA 5'

AT4G04490.1 1148 1166  
putative receptor-like protein kinase

SRNA\_AG01\_SoLexa\_Mi2008\_1\_51110\_hit1

5' UUGAUGAUGAUCACAGUUGUGU  
|||||  
AACUACUACUAGUC-CAAC-CA 5'

AT4G04830.1 1 20  
Unknown protein

leaves\_1sup\_AG01\_SoLexa\_Mi\_Cell\_2008\_hit\_target\_site.txt

SRNA\_AG01\_SoLexa\_Mi2008\_1\_32728\_hit1

5' UCUAAGGGAAAAUGUAUGAGC  
: ||||| |||||  
GUAUCCUUU-ACAUACUCG 5'  
AT4G04920.1 3700 3719  
unknown protein

SRNA\_AG01\_SoLexa\_Mi2008\_1\_20752\_hit15

5' UAGAAAUGCACUGC-UA-GAUC  
||| ||||| || |||  
AUCUUUACGUGACGUUACUAG 5'  
AT4G07410.1 1543 1565  
unknown protein

SRNA\_AG01\_SoLexa\_Mi2008\_1\_20752\_hit15

5' UAGAAAUGCACUGC-UA-GAUC  
||| ||||| || |||  
AUCUUUACGUGACGUUACUAG 5'  
AT4G07410.2 1685 1707  
unknown protein

SRNA\_AG01\_SoLexa\_Mi2008\_1\_49909\_hit1

5' UUGAAACGAACCAAG-GCUGCCU  
||| |||| | |||||  
AACUUUACUUGG-UCACGACGGA 5'  
AT4G07410.1 1940 1961  
unknown protein

SRNA\_AG01\_SoLexa\_Mi2008\_1\_49909\_hit1

5' UUGAAACGAACCAAG-GCUGCCU  
||| |||| | |||||  
AACUUUACUUGGU-CACGACGGA 5'  
AT4G07410.2 2082 2103  
unknown protein

SRNA\_AG01\_SoLexa\_Mi2008\_3\_4568\_hit12

5' CAAGAAGAAGAUGAGAACA-AUG  
||||||| |||| | |||  
GUUCUUCUUCUCUU-UCUAC 5'  
AT4G08330.1 244 265  
unknown protein

SRNA\_AG01\_SoLexa\_Mi2008\_1\_21813\_hit1

5' UAGAUGAUGGACUUCGAUGAU  
|| ||||| |||||: |||||  
CUC-ACUACCUGAAGUUACUA 5'  
AT4G08350.1 1262 1281  
putative protein

SRNA\_AG01\_SoLexa\_Mi2008\_1\_2916\_hit1

5' AUCGUGGACUCAUAG-C-UGU  
||||||| |||| | |||  
UAGCACCUGAGUAUCCGCACA 5'  
AT4G08350.1 2539 2559  
putative protein

SRNA\_AG01\_SoLexa\_Mi2008\_44\_10639\_hit2

5' CUC-AAGAUGGCAGCAU-AGU  
|| ||||| |||| | |||  
UAGCUUCUACCGUCGUAGUCA 5'  
AT4G08390.2 1048 1068  
stromal ascorbate peroxidase

leaves\_1sup\_AG01\_SoLexa\_Mi\_Cell\_2008\_hit\_target\_site.txt

SRNA\_AG01\_SoLexa\_Mi2008\_5\_5124\_hit2

5' CAAUCU-C-AAGAUGGCAGCAU  
 ||||| | |||||  
 GUUAGAAGCUUCUACCGUCGUA 5'  
 AT4G08390.2 1052 1073  
 stromal ascorbate peroxidase

SRNA\_AG01\_SoLexa\_Mi2008\_5\_19199\_hit2

5' UACAAUCU-C-AAGAUGGCAGCAU  
 | ||||| | |||||  
 AAGUUAGAAGCUUCUACCGUCGUA 5'  
 AT4G08390.2 1052 1075  
 stromal ascorbate peroxidase

SRNA\_AG01\_SoLexa\_Mi2008\_1\_19198\_hit2

5' UACAAUCU-C-AAGAUGGCAGCA  
 | ||||| | |||||  
 AAGUUAGAAGCUUCUACCGUCGU 5'  
 AT4G08390.2 1053 1075  
 stromal ascorbate peroxidase

SRNA\_AG01\_SoLexa\_Mi2008\_44\_10639\_hit2

5' CUC-AAGAUGGCAGCAU-AGU  
 || ||||| |||||  
 UAGCUUCUACCGUCGUAGUCA 5'  
 AT4G08390.1 1058 1078  
 stromal ascorbate peroxidase

SRNA\_AG01\_SoLexa\_Mi2008\_5\_5124\_hit2

5' CAAUCU-C-AAGAUGGCAGCAU  
 ||||| | |||||  
 GUUAGAAGCUUCUACCGUCGUA 5'  
 AT4G08390.1 1062 1083  
 stromal ascorbate peroxidase

SRNA\_AG01\_SoLexa\_Mi2008\_5\_19199\_hit2

5' UACAAUCU-C-AAGAUGGCAGCAU  
 | ||||| | |||||  
 AAGUUAGAAGCUUCUACCGUCGUA 5'  
 AT4G08390.1 1062 1085  
 stromal ascorbate peroxidase

SRNA\_AG01\_SoLexa\_Mi2008\_1\_19198\_hit2

5' UACAAUCU-C-AAGAUGGCAGCA  
 | ||||| | |||||  
 AAGUUAGAAGCUUCUACCGUCGU 5'  
 AT4G08390.1 1063 1085  
 stromal ascorbate peroxidase

SRNA\_AG01\_SoLexa\_Mi2008\_1\_50784\_hit1

5' UUGAGGUAAAUGAUGUCCCCCAU  
 ||||| ||||| |||||  
 AACUC-AUUUAAUACACGGGGGUA 5'  
 AT4G08390.3 1066 1088  
 stromal ascorbate peroxidase

SRNA\_AG01\_SoLexa\_Mi2008\_1\_50784\_hit1

5' UUGAGGUAAAUGAUGUCCCCCAU  
 ||||| ||||| |||||  
 AACUC-AUUUAAUACACGGGGGUA 5'  
 AT4G08390.2 1203 1225  
 stromal ascorbate peroxidase

leaves\_1sup\_AG01\_SoLexa\_Mi\_Cell\_2008\_hit\_target\_site.txt

SRNA\_AG01\_SoLexa\_Mi2008\_1\_50784\_hit1

```
5' UUGAGGUAAAUGAUGUUCSCCAU
    ||||| ||||| |||| | |||||
    AACUC-AUUUAAUACACGGGGGUA 5'
AT4G08390.1 1213 1235
stromal ascorbate peroxidase
```

SRNA\_AG01\_SoLexa\_Mi2008\_3\_10123\_hit2

```
5' CUAGAGACGAGAGAU-U-ACU
    ||||| ||||| |||| | ||
    GAUCUCUGCUCUCUAGACUGC 5'
AT4G08390.3 130 150
stromal ascorbate peroxidase
```

SRNA\_AG01\_SoLexa\_Mi2008\_3\_10123\_hit2

```
5' CUAGAGACGAGAGAU-U-ACU
    ||||| ||||| |||| | ||
    GAUCUCUGCUCUCUAGACUGC 5'
AT4G08390.2 264 284
stromal ascorbate peroxidase
```

SRNA\_AG01\_SoLexa\_Mi2008\_3\_10123\_hit2

```
5' CUAGAGACGAGAGAU-U-ACU
    ||||| ||||| |||| | ||
    GAUCUCUGCUCUCUAGACUGC 5'
AT4G08390.1 274 294
stromal ascorbate peroxidase
```

SRNA\_AG01\_SoLexa\_Mi2008\_44\_10639\_hit2

```
5' CUC-AAGAUGGCAGCAU-AGU
    || ||||| ||||| ||||
    UAGCUUCUACCGUCGUAGUCA 5'
AT4G08390.3 911 931
stromal ascorbate peroxidase
```

SRNA\_AG01\_SoLexa\_Mi2008\_5\_5124\_hit2

```
5' CAAUCU-C-AAGAUGGCAGCAU
    ||||| | ||||| |||||
    GUUAGAAGCUUCUACCGUCGUA 5'
AT4G08390.3 915 936
stromal ascorbate peroxidase
```

SRNA\_AG01\_SoLexa\_Mi2008\_5\_19199\_hit2

```
5' UACAAUCU-C-AAGAUGGCAGCAU
    | ||||| | ||||| |||||
    AAGUUAGAAGCUUCUACCGUCGUA 5'
AT4G08390.3 915 938
stromal ascorbate peroxidase
```

SRNA\_AG01\_SoLexa\_Mi2008\_1\_19198\_hit2

```
5' UACAAUCU-C-AAGAUGGCAGCA
    | ||||| | ||||| |||||
    AAGUUAGAAGCUUCUACCGUCGU 5'
AT4G08390.3 916 938
stromal ascorbate peroxidase
```

SRNA\_AG01\_SoLexa\_Mi2008\_2\_411\_hit5

```
5' AAAGAUGA-AGAGAGAAAGAGA
    |||| | ||||| |||||
    GUUCU-CUCUCUCUCUUCUCU 5'
AT4G08500.1 39 59
MEKK1/MAP kinase kinase
```

leaves\_1sup\_AG01\_SoLexa\_Mi\_Cell\_2008\_hit\_target\_site.txt

SRNA\_AG01\_SoLexa\_Mi2008\_1\_41654\_hit1

```
5' UGGCUUA-GCUACUGGUGGUU
   ||||| | |||||:
   ACCGAAUUC-AUGACCACCAG 5'
AT4G08500.1 913 932
MEKK1/MAP kinase kinase kinase
```

SRNA\_AG01\_SoLexa\_Mi2008\_1\_51111\_hit1

```
5' UUGAUGAUGAUGAUGGUUUGA
   ||||| |||||
   CUCUACUACUACUACCAAACA 5'
AT4G09730.1 1687 1707
putative protein
```

SRNA\_AG01\_SoLexa\_Mi2008\_1\_40485\_hit1

```
5' UGGAGGA-AUGAUGAUGAUGUG
   ||||| |||||
   ACCUCCUCUACUACUACUACCA 5'
AT4G09730.1 1692 1713
putative protein
```

SRNA\_AG01\_SoLexa\_Mi2008\_1\_36323\_hit13

```
5' UGAGGAUGAUGAUGAUGAUGA
   :||| |||||
   GCUCCU-CUACUACUACUACC 5'
AT4G09730.1 1693 1712
putative protein
```

SRNA\_AG01\_SoLexa\_Mi2008\_1\_38921\_hit1

```
5' UGC-GGACGAUGAUGAUGAUGAU
   ||| ||| || |||||
   ACGUCCUCCU-CUACUACUACUA 5'
AT4G09730.1 1695 1716
putative protein
```

SRNA\_AG01\_SoLexa\_Mi2008\_1\_36323\_hit13

```
5' UG-AGGAUGAUGAUGAUGAUGA
   || ||| || |||||
   ACGUCCUCCU-CUACUACUACU 5'
AT4G09730.1 1696 1716
putative protein
```

SRNA\_AG01\_SoLexa\_Mi2008\_1\_15319\_hit1

```
5' GGUGGAAGCUGUGGUU-GUGGA
   ||||| ||| ||| |||
   CCACCUUAGAC-CCAAACACCU 5'
AT4G09730.1 179 199
putative protein
```

SRNA\_AG01\_SoLexa\_Mi2008\_1\_3030\_hit2

```
5' AUGAGGAGGAAGAUGGUU-UG
   ||||| ||| ||| |||
   GACUCCUCCUUCUCCCAACAC 5'
AT4G09730.1 34 54
putative protein
```

SRNA\_AG01\_SoLexa\_Mi2008\_13\_5218\_hit2

```
5' CAAU-UCAGUAGGGACCUCAAG
   ||| |||||: |||||
   GUUAGAGUCAUCCUUGGAGUUA 5'
AT4G09730.1 478 499
putative protein
```

leaves\_1sup\_AG01\_SoLexa\_Mi\_Cell\_2008\_hit\_target\_site.txt

SRNA\_AG01\_SoLexa\_Mi2008\_1\_11311\_hit1  
5' CUGA-A-AAAAAAGAGAGGG  
    |||| | |||  
    GACUCUGUUUUUUUCUCUCCG 5'  
AT4G10970.3     20     40  
putative protein

SRNA\_AG01\_SoLexa\_Mi2008\_1\_11311\_hit1  
5' CUGA-A-AAAAAAGAGAGGG  
    |||| | |||  
    GACUCUGUUUUUUUCUCUCCG 5'  
AT4G10970.4     38     58  
putative protein

SRNA\_AG01\_SoLexa\_Mi2008\_1\_3358\_hit1  
5' AUGGUA-GUUGAUGGUAGUUGU  
    ||||| |||  
    UACCAUUAACUACAAUCAACC 5'  
AT4G11170.1     2083    2104  
RPP1-wsa-like disease resistance protein

SRNA\_AG01\_SoLexa\_Mi2008\_1\_173\_hit2  
5' AAAAGAAGAAGAUAA-AGCAU  
    |||||:| |||  
    UUUUCUUCUUCUGUUAUCGU 5'  
AT4G11890.1     1159    1179  
protein kinase - like protein

SRNA\_AG01\_SoLexa\_Mi2008\_1\_172\_hit2  
5' AAAAGAAGAAGAUAA-AGCA  
    |||||:| |||  
    UUUUCUUCUUCUGUUAUCGU 5'  
AT4G11890.1     1160    1179  
protein kinase - like protein

SRNA\_AG01\_SoLexa\_Mi2008\_2\_16280\_hit2  
5' UAAAAAGAAGAAGAUAA-AGCA  
    |||||:| |||  
    CUUUUUCUUCUUCUGUUAUCGU 5'  
AT4G11890.1     1160    1181  
protein kinase - like protein

SRNA\_AG01\_SoLexa\_Mi2008\_1\_173\_hit2  
5' AAAAGAAGAAGAUAA-AGCAU  
    |||||:| |||  
    UUUUCUUCUUCUGUUAUCGU 5'  
AT4G11890.3     1170    1190  
protein kinase - like protein

SRNA\_AG01\_SoLexa\_Mi2008\_1\_172\_hit2  
5' AAAAGAAGAAGAUAA-AGCA  
    |||||:| |||  
    UUUUCUUCUUCUGUUAUCGU 5'  
AT4G11890.3     1171    1190  
protein kinase - like protein

SRNA\_AG01\_SoLexa\_Mi2008\_2\_16280\_hit2  
5' UAAAAAGAAGAAGAUAA-AGCA  
    |||||:| |||  
    CUUUUUCUUCUUCUGUUAUCGU 5'  
AT4G11890.3     1171    1192  
protein kinase - like protein

leaves\_1sup\_AG01\_SoLexa\_Mi\_Cell\_2008\_hit\_target\_site.txt

SRNA\_AG01\_SoLexa\_Mi2008\_1\_173\_hit2

5' AAAAGAAGAAGAUAA-AGCAU  
|||||:||||  
UUUUCUUCUUCUGUUAUCGUU 5'  
AT4G11890.4 1190 1210  
protein kinase - like protein

SRNA\_AG01\_SoLexa\_Mi2008\_1\_172\_hit2

5' AAAAGAAGAAGAUAA-AGCA  
|||||:||||  
UUUUCUUCUUCUGUUAUCGU 5'  
AT4G11890.4 1191 1210  
protein kinase - like protein

SRNA\_AG01\_SoLexa\_Mi2008\_2\_16280\_hit2

5' UAAAAAGAAGAAGAUAA-AGCA  
|||||:||||  
CUUUUUCUUCUUCUGUUAUCGU 5'  
AT4G11890.4 1191 1212  
protein kinase - like protein

SRNA\_AG01\_SoLexa\_Mi2008\_1\_173\_hit2

5' AAAAGAAGAAGAUAA-AGCAU  
|||||:||||  
UUUUCUUCUUCUGUUAUCGUU 5'  
AT4G11890.2 1545 1565  
protein kinase - like protein

SRNA\_AG01\_SoLexa\_Mi2008\_1\_172\_hit2

5' AAAAGAAGAAGAUAA-AGCA  
|||||:||||  
UUUUCUUCUUCUGUUAUCGU 5'  
AT4G11890.2 1546 1565  
protein kinase - like protein

SRNA\_AG01\_SoLexa\_Mi2008\_2\_16280\_hit2

5' UAAAAAGAAGAAGAUAA-AGCA  
|||||:||||  
CUUUUUCUUCUUCUGUUAUCGU 5'  
AT4G11890.2 1546 1567  
protein kinase - like protein

SRNA\_AG01\_SoLexa\_Mi2008\_1\_29903\_hit2

5' UCCGCAAAACCAAGGUCCUGC  
|| ||||| |||||  
CGG-GUUUUUGUCCAGGACG 5'  
AT4G12120.1 1478 1497  
unknown protein

SRNA\_AG01\_SoLexa\_Mi2008\_1\_1044\_hit2

5' AAUCCUGAUGAUG-CUGCAU  
||||| || |||  
UUAGGACUACUACUGAGGUA 5'  
AT4G12560.2 1555 1574  
putative protein

SRNA\_AG01\_SoLexa\_Mi2008\_2\_1701\_hit3

5' ACUCAAGAGAUGAU-AUAAA  
||||| |||||  
AUAGUUCUCUACUAAUUUU 5'  
AT4G12560.2 653 672  
putative protein

leaves\_1sup\_AG01\_SoLexa\_Mi\_Cell\_2008\_hit\_target\_site.txt

SRNA\_AG01\_SoLexa\_Mi2008\_1\_14470\_hit10

5' GCAGC-CCGACGUAUCAGA  
|||:| |||  
CGUUGCGGCUGCAUUAGUCU 5'  
AT4G12570.1 329 348  
polyubiquitin-like protein

SRNA\_AG01\_SoLexa\_Mi2008\_1\_37137\_hit1

5' UGAUCUGGUGAAGUGUUCGG  
||| |||  
ACUAGACCACUUCA-AAGAA 5'  
AT4G12730.1 365 383  
fasciclin-like arabinogalactan protein FLA2

SRNA\_AG01\_SoLexa\_Mi2008\_1\_29609\_hit1

5' UCCCAAAACAAUUAUUGU-AGUA  
| ||| |||  
AUGGUUUUGUUAUAA-AUUCAU 5'  
AT4G13510.1 1604 1624  
ammonium transport protein (AMT1)

SRNA\_AG01\_SoLexa\_Mi2008\_9\_5443\_hit29

5' CACCACCAUCACCAUCACUCG  
||| |||  
GUGGUGGUAGUGGU-G-GAGG 5'  
AT4G13850.4 431 449  
glycine-rich RNA-binding protein AtGRP2 - like

SRNA\_AG01\_SoLexa\_Mi2008\_9\_5443\_hit29

5' CACCACCAUCACCAUCACUCG  
||| |||  
GUGGUGGUAGUGGU-G-GAGG 5'  
AT4G13850.3 476 494  
glycine-rich RNA-binding protein AtGRP2 - like

SRNA\_AG01\_SoLexa\_Mi2008\_9\_5443\_hit29

5' CACCACCAUCACCAUCACUCG  
||| |||  
GUGGUGGUAGUGGU-G-GAGG 5'  
AT4G13850.2 503 521  
glycine-rich RNA-binding protein AtGRP2 - like

SRNA\_AG01\_SoLexa\_Mi2008\_9\_5443\_hit29

5' CACCACCAUCACCAUCACUCG  
||| |||  
GUGGUGGUAGUGGU-G-GAGG 5'  
AT4G13850.1 517 535  
glycine-rich RNA-binding protein AtGRP2 - like

SRNA\_AG01\_SoLexa\_Mi2008\_16\_13755\_hit1

5' GACGAUAAGCAUUGGCAUU  
: ||| : |||  
UUGCUAUUCGUAACUGUAA 5'  
AT4G14365.1 281 299  
C3HC4-type zinc finger ankyrin repeat protein - like

SRNA\_AG01\_SoLexa\_Mi2008\_1\_51487\_hit1

5' UUGCCACAUGUAG-GGAUGUC  
||| |||  
UACGGUGUACAUCGCC-ACAG 5'  
AT4G14400.2 424 443  
unknown protein

leaves\_1sup\_AG01\_SoLexa\_Mi\_Cell\_2008\_hit\_target\_site.txt

SRNA\_AG01\_SoLexa\_Mi2008\_1\_51487\_hit1

```
5' UUGCCACAUGUAG-GGAUGUC
  |||
  UACGGUGUACAUCGCC-ACAG 5'
AT4G14400.3 488 507
unknown protein
```

SRNA\_AG01\_SoLexa\_Mi2008\_1\_51487\_hit1

```
5' UUGCCACAUGUAG-GGAUGUC
  |||
  UACGGUGUACAUCGCC-ACAG 5'
AT4G14400.1 507 526
unknown protein
```

SRNA\_AG01\_SoLexa\_Mi2008\_4\_50857\_hit1

```
5' UUGAGGUGUUGAUUAAAGUG-UU
  |||
  AACUCCACAACUAGUUUGACGAA 5'
AT4G14746.1 202 224
putative protein
```

SRNA\_AG01\_SoLexa\_Mi2008\_3\_10294\_hit3

```
5' CUAGGGUUUCAUGAU-UGUA
  |||
  GAUCCCAAAGUUAGUAGACAG 5'
AT4G14900.1 268 288
hydroxyproline-rich glycoprotein homolog (z97337.18)
```

SRNA\_AG01\_SoLexa\_Mi2008\_1\_5287\_hit5

```
5' CACAAGGACAAGAAUUGG
  |||
  UUGUUCCCGUUCUUUAACG 5'
AT4G14905.1 1319 1337
```

SRNA\_AG01\_SoLexa\_Mi2008\_1\_5287\_hit5

```
5' CACAAGGACAAGAAUUGG
  |||
  UUGUUCCCGUUCUUUAACG 5'
AT4G14905.2 1555 1573
```

SRNA\_AG01\_SoLexa\_Mi2008\_12\_20785\_hit2

```
5' UAGAAAGGGCAAUACACGUG
  |||
  AUCUUCCCGUU-U-UGUACAC 5'
AT4G16370.1 2273 2292
isp4 like protein
```

SRNA\_AG01\_SoLexa\_Mi2008\_1\_13420\_hit2

```
5' GAAGAAGAAGAAGACUCU
  |||
  CUUCUUCUUCUCUGAGCC 5'
AT4G16745.1 406 424
```

SRNA\_AG01\_SoLexa\_Mi2008\_2\_16\_hit1

```
5' AAAAAAAGAGAGGGACGAA
  |||
  UUUUUUUGUCUCCU-CUU 5'
AT4G16760.1 78 95
unknown protein
```

SRNA\_AG01\_SoLexa\_Mi2008\_1\_2\_hit38

```
5' AAAAAAAAAAAAAACCAU
```

leaves\_1sup\_AG01\_SoLexa\_Mi\_Cell\_2008\_hit\_target\_site.txt

|||||  
UUUUUUUUUUUUUUUGUCU 5'  
AT4G16760.1 84 102  
unknown protein

SRNA\_AG01\_SoLexa\_Mi2008\_1\_1776\_hit10  
5' AGAAAAAAAAAAAAAAAAAAU  
|||||:  
CCUUUUUUUUUUUUUUUUUG 5'  
AT4G16760.1 87 107  
unknown protein

SRNA\_AG01\_SoLexa\_Mi2008\_1\_3\_hit25  
5' AAAAAAAAAAAAAAGAAAGA  
||||| |||:  
UUUUUUUUUUUUU-UUUUG 5'  
AT4G16760.1 88 105  
unknown protein

SRNA\_AG01\_SoLexa\_Mi2008\_1\_3\_hit25  
5' AAAAAAAAAAAAAAGAAAGA  
||||| |||:  
UUUUUUUUUUUUU-UUUUU 5'  
AT4G16760.1 89 106  
unknown protein

SRNA\_AG01\_SoLexa\_Mi2008\_1\_48909\_hit1  
5' UUCAUUGAAUAGCACAUGUGA  
||||| |||  
AAGUAAAUUAUCGUGUAAACU 5'  
AT4G17660.1 714 734  
NAK like protein kinase

SRNA\_AG01\_SoLexa\_Mi2008\_2\_5924\_hit1  
5' CAGAACGGUGUGGUC-CCUCUGU  
||||| || |||||  
GUCUUGCCACAC-AGAGGAGACA 5'  
AT4G17670.1 351 372  
unknown protein

SRNA\_AG01\_SoLexa\_Mi2008\_2\_20775\_hit1  
5' UAGAAAGAGU-UUUAGGUGAAGA  
||||| | |||||:|||||  
AUCUUUCU-AGAAUCUACUUCU 5'  
AT4G17670.1 634 655  
unknown protein

SRNA\_AG01\_SoLexa\_Mi2008\_2\_34699\_hit1  
5' UGAAGCUG-CUUCUGGUGGUUC  
||||| || | |||||:|||  
ACUUCGACGGAA-ACCACUAAG 5'  
AT4G17720.1 940 960  
unknown protein

SRNA\_AG01\_SoLexa\_Mi2008\_1\_36919\_hit1  
5' UGAGUUU-GAUGCACGUUCGGA  
||||| || | |||||  
ACUCAAACUAAGUGCAAGCCG 5'  
AT4G17720.1 973 994  
unknown protein

SRNA\_AG01\_SoLexa\_Mi2008\_2\_50953\_hit1  
5' UUGAGUUU-GAUGCACGUUCGG

leaves\_1sup\_AG01\_SoLexa\_Mi\_Cell\_2008\_hit\_target\_site.txt

:||||||| ||| |||||||||  
GACUCAAAACUAAGUGCAAGCC 5'  
AT4G17720.1 974 995  
unknown protein

SRNA\_AG01\_SoLexa\_Mi2008\_5\_24931\_hit2  
5' UAUC-AUUGUGAAGCAGAAUUC  
||||| ||||||||| ||||||||| :|  
AUAGCUAACACUUCGUCUUUGG 5'  
AT4G18270.1 593 614  
translocase I

SRNA\_AG01\_SoLexa\_Mi2008\_6\_649\_hit8  
5' AA-CAGACGCUCUAUCCACU  
|| ||||||| |||||||||  
UUCGUCUGCCAGAUAGGUGC 5'  
AT4G19190.1 1354 1373

SRNA\_AG01\_SoLexa\_Mi2008\_1\_56030\_hit2  
5' UUUGUAGAGAAACAUGAGAGA  
||||| ||||||| |||||||||  
AAAC-UCUCUUUCUACUCUCU 5'  
AT4G20830.2 101 120  
reticuline oxidase -like protein

SRNA\_AG01\_SoLexa\_Mi2008\_1\_56030\_hit2  
5' UUUGUAGAGAAACAUGAGAGA  
||||| ||||||| |||||||||  
AAAC-UCUCUUUCUACUCUCU 5'  
AT4G20830.1 108 127  
reticuline oxidase -like protein

SRNA\_AG01\_SoLexa\_Mi2008\_4\_6008\_hit1  
5' CAGACUGAGAUUCGUCGUUGGU  
||||| ||| |||||||||  
GUCUG-CUCAAGCAGCAACCA 5'  
AT4G21540.2 16 36

SRNA\_AG01\_SoLexa\_Mi2008\_4\_6008\_hit1  
5' CAGACUGAGAUUCGUCGUUGGU  
||||| ||| |||||||||  
GUCUG-CUCAAGCAGCAACCA 5'  
AT4G21540.1 2334 2354

SRNA\_AG01\_SoLexa\_Mi2008\_4\_6008\_hit1  
5' CAGACUGAGAUUCGUCGUUGGU  
||||| ||| |||||||||  
GUCUG-CUCAAGCAGCAACCA 5'  
AT4G21540.4 23 43

SRNA\_AG01\_SoLexa\_Mi2008\_1\_35652\_hit7  
5' UGACU-C-AACAUGACCGGCGU  
||||| | |||||||||  
ACUGAUGGUUGUACUGGCCGCU 5'  
AT4G21910.3 301 322  
unknown protein

SRNA\_AG01\_SoLexa\_Mi2008\_1\_35652\_hit7  
5' UGACU-C-AACAUGACCGGCGU  
||||| | |||||||||  
ACUGAUGGUUGUACUGGCCGCU 5'  
AT4G21910.1 362 383  
unknown protein

leaves\_1sup\_AG01\_SoLexa\_Mi\_Cell\_2008\_hit\_target\_site.txt

SRNA\_AG01\_SoLexa\_Mi2008\_1\_38809\_hit1

5' UGCGAGCUGAUGGUCCACAAG  
|||||  
ACGCUCGACUACCAGGUGUUC 5'  
AT4G21960.1 957 977  
peroxidase prxr1

SRNA\_AG01\_SoLexa\_Mi2008\_105\_14948\_hit3

5' GGCAUAACAGGUCUGUGA  
|||||  
ACGUUAUUGUCCAGA-ACA 5'  
AT4G22380.1 364 381  
Ribosomal protein L7Ae - like (fragment)

SRNA\_AG01\_SoLexa\_Mi2008\_3\_2154\_hit3

5' AGGCAAUAACAGGUCUGUG  
|||||  
AACGUUAUUGUCCAGA-AC 5'  
AT4G22380.1 365 382  
Ribosomal protein L7Ae - like (fragment)

SRNA\_AG01\_SoLexa\_Mi2008\_1\_14875\_hit1

5' GGAGGUGGAGGCGGUGG-UGGU  
: |||||  
UGUCCACCUCGCCACCAACCA 5'  
AT4G22470.1 207 228  
extensin - like protein

SRNA\_AG01\_SoLexa\_Mi2008\_2\_43577\_hit1

5' UGGUGGUGGUGACG-UUGGUGGU  
|||||  
ACCACCACCACU-CUAACAACCA 5'  
AT4G22470.1 778 799  
extensin - like protein

SRNA\_AG01\_SoLexa\_Mi2008\_1\_43578\_hit1

5' UGGUGGUGGUGAUGAUGUGUC  
|||||  
ACCACCACCACU-CUA-ACAA 5'  
AT4G22470.1 781 799  
extensin - like protein

SRNA\_AG01\_SoLexa\_Mi2008\_4\_10367\_hit4

5' CUAGUGAGGAAUGAGAAAAGG  
|||||  
GAUCACUCCUUACUCUUUUC 5'  
AT4G23150.1 32 52  
serine/threonine kinase - like protein

SRNA\_AG01\_SoLexa\_Mi2008\_2\_29105\_hit1

5' UCAUUGAGUACUGACCAUGCA  
|||||  
AGUACCUCAUAACUGGUACGU 5'  
AT4G23190.1 1696 1716  
serine/threonine kinase - like protein

SRNA\_AG01\_SoLexa\_Mi2008\_9\_14254\_hit8

5' GAUGAUGAUGAUGAUGAUCUU  
|||||  
CUACUACUACUCCUACU-GAU 5'  
AT4G23210.2 926 945  
serine/threonine kinase - like protein

leaves\_1sup\_AG01\_SoLexa\_Mi\_Cell\_2008\_hit\_target\_site.txt

SRNA\_AG01\_SoLexa\_Mi2008\_1\_36323\_hit13  
5' UGAGGAUGAUGAUGAUGAUGA  
   ||| ||||||||||| |||||  
   CCUC-UACUACUACUCCUACU 5'  
AT4G23210.2      929      948  
serine/threonine kinase - like protein

SRNA\_AG01\_SoLexa\_Mi2008\_1\_7931\_hit2  
5' CCCGAUGAUGAUGAUGAGAC  
   ||||| |||||||||||  
   GGGCU-CUACUACUACUCCU 5'  
AT4G23210.2      932      950  
serine/threonine kinase - like protein

SRNA\_AG01\_SoLexa\_Mi2008\_9\_14254\_hit8  
5' GAUGAUGAUGAUGAUGAUCUU  
   ||||||||| ||||| ||  
   CUACUACUACUCCUACU-GAU 5'  
AT4G23210.3      987      1006  
serine/threonine kinase - like protein

SRNA\_AG01\_SoLexa\_Mi2008\_1\_36323\_hit13  
5' UGAGGAUGAUGAUGAUGAUGA  
   ||| ||||||||||| |||||  
   CCUC-UACUACUACUCCUACU 5'  
AT4G23210.3      990      1009  
serine/threonine kinase - like protein

SRNA\_AG01\_SoLexa\_Mi2008\_1\_7931\_hit2  
5' CCCGAUGAUGAUGAUGAGAC  
   ||||| |||||||||||  
   GGGCU-CUACUACUACUCCU 5'  
AT4G23210.3      993      1011  
serine/threonine kinase - like protein

SRNA\_AG01\_SoLexa\_Mi2008\_1\_1652\_hit1  
5' ACGGUGCGUGAAUUGUAUU  
   ||||||||| |||||||  
   UGCCACGCACUUAACAUAA 5'  
AT4G23470.3      1161      1179  
putative protein

SRNA\_AG01\_SoLexa\_Mi2008\_2\_24561\_hit1  
5' UAUAGGGUGCGUGAAU-GUAAU  
   |||| | ||||||||||| ||| |  
   AUAUGCCACGCACUUAACAUAA 5'  
AT4G23470.3      1162      1183  
putative protein

SRNA\_AG01\_SoLexa\_Mi2008\_1\_1652\_hit1  
5' ACGGUGCGUGAAUUGUAUU  
   ||||||||| |||||||  
   UGCCACGCACUUAACAUAA 5'  
AT4G23470.1      1227      1245  
putative protein

SRNA\_AG01\_SoLexa\_Mi2008\_2\_24561\_hit1  
5' UAUAGGGUGCGUGAAU-UGUAUU  
   |||| | ||||||||||| ||| |  
   AUAUGCCACGCACUUAACAUAA 5'  
AT4G23470.1      1228      1249  
putative protein

leaves\_1sup\_AG01\_SoLexa\_Mi\_Cell\_2008\_hit\_target\_site.txt

SRNA\_AG01\_SoLexa\_Mi2008\_1\_1652\_hit1

5' ACGGUGCGUGAAUUGUAUU  
|||||  
UGCCACGCACUUAACAUAA 5'  
AT4G23470.2 1575 1593  
putative protein

SRNA\_AG01\_SoLexa\_Mi2008\_2\_24561\_hit1

5' UAUAGGGUGCGUGAA-UGUAAU  
|||||  
AUAUGCCACGCACUUAACAUAA 5'  
AT4G23470.2 1576 1597  
putative protein

SRNA\_AG01\_SoLexa\_Mi2008\_2\_7736\_hit1

5' CCAGAA-AAGAAGAAACAAU  
|||||  
UGUCUUCUUCUUCUUGUUC 5'  
AT4G23470.2 660 679  
putative protein

SRNA\_AG01\_SoLexa\_Mi2008\_2\_20292\_hit1

5' UACGGGU-AUGCCUCGGGGUGCU  
|||||  
AUGCCAAAUACGGAGCCCUACGA 5'  
AT4G23700.1 1582 1604  
putative Na<sup>+</sup>/H<sup>+</sup>-exchanging protein

SRNA\_AG01\_SoLexa\_Mi2008\_1\_31650\_hit1

5' UCGCUUAUGAGA-UUGUGGAUC  
|||||  
AGCGAAUUCUCUAAAC-CCUAG 5'  
AT4G23700.1 500 520  
putative Na<sup>+</sup>/H<sup>+</sup>-exchanging protein

SRNA\_AG01\_SoLexa\_Mi2008\_7\_3078\_hit1

5' AUGAUGAUGAGAAUGAUGAU  
||  
UA-UACUACUCUUACU-CUC 5'  
AT4G23810.1 13 30  
unknown protein

SRNA\_AG01\_SoLexa\_Mi2008\_2\_56577\_hit1

5' UUUUGG-UCGGUGUGUAUGU  
|||||  
AAAACCCAGCCACUCAUACU 5'  
AT4G24190.2 2303 2322  
HSP90-like protein

SRNA\_AG01\_SoLexa\_Mi2008\_2\_56577\_hit1

5' UUUUGG-UCGGUGUGUAUGU  
|||||  
AAAACCCAGCCACUCAUACU 5'  
AT4G24190.1 2307 2326  
HSP90-like protein

SRNA\_AG01\_SoLexa\_Mi2008\_9\_24682\_hit1

5' UAU AUGCAAAGAGUAAGAUG  
|||||  
AUUAACGUUUUCUUA-UCUAA 5'  
AT4G24230.6 1156 1175  
unknown protein

leaves\_1sup\_AG01\_SoLexa\_Mi\_Cell\_2008\_hit\_target\_site.txt

SRNA\_AG01\_SoLexa\_Mi2008\_9\_24682\_hit1

5' UAUAUGCAAAAGAGUAAGAUG  
 |||  
 AUAUACGUUUUCUUAU-CUAA 5'  
 AT4G24230.3 1166 1185  
 unknown protein

SRNA\_AG01\_SoLexa\_Mi2008\_9\_24682\_hit1

5' UAUAUGCAAAAGAGUAAGAUG  
 |||  
 AUAUACGUUUUCUUAU-CUAA 5'  
 AT4G24230.4 1170 1189  
 unknown protein

SRNA\_AG01\_SoLexa\_Mi2008\_9\_24682\_hit1

5' UAUAUGCAAAAGAGUAAGAUG  
 |||  
 AUAUACGUUUUCUUA-UCUAA 5'  
 AT4G24230.1 1217 1236  
 unknown protein

SRNA\_AG01\_SoLexa\_Mi2008\_9\_24682\_hit1

5' UAUAUGCAAAAGAGUAAGAUG  
 |||  
 AUAUACGUUUUCUUA-UCUAA 5'  
 AT4G24230.2 1261 1280  
 unknown protein

SRNA\_AG01\_SoLexa\_Mi2008\_2\_12201\_hit1

5' CUGUCCUCGAAAUAAGAUCU  
 |||  
 GACAGGAGCUUGA-UUCUAGU 5'  
 AT4G24230.6 377 396  
 unknown protein

SRNA\_AG01\_SoLexa\_Mi2008\_2\_12201\_hit1

5' CUGUCCUCGAAAUAAGAUCU  
 |||  
 GACAGGAGCUUGA-UUCUAGU 5'  
 AT4G24230.4 390 409  
 unknown protein

SRNA\_AG01\_SoLexa\_Mi2008\_2\_12201\_hit1

5' CUGUCCUCGAAAUAAGAUCU  
 |||  
 GACAGGAGCUUGA-UUCUAGU 5'  
 AT4G24230.5 391 410  
 unknown protein

SRNA\_AG01\_SoLexa\_Mi2008\_2\_12201\_hit1

5' CUGUCCUCGAAAUAAGAUCU  
 |||  
 GACAGGAGCUUGA-UUCUAGU 5'  
 AT4G24230.3 393 412  
 unknown protein

SRNA\_AG01\_SoLexa\_Mi2008\_2\_12201\_hit1

5' CUGUCCUCGAAAUAAGAUCU  
 |||  
 GACAGGAGCUUGA-UUCUAGU 5'  
 AT4G24230.1 444 463  
 unknown protein

leaves\_1sup\_AG01\_SoLexa\_Mi\_Cell\_2008\_hit\_target\_site.txt

SRNA\_AG01\_SoLexa\_Mi2008\_2\_12201\_hit1

5' CUGUCCUCGAAAUAAAGAUCU  
| | | | | | | | | | | | | | | | | | | | | | | | | | | | | | | | | | | | | | | |  
GACAGGAGCUUGA-UUCUAGU 5'  
AT4G24230.2 469 488  
unknown protein

SRNA\_AG01\_SoLexa\_Mi2008\_1\_16810\_hit10

5' UAAAG-GAGAACAUGACGGUGG  
| | | | | | | | | | | | | | | | | | | | | | | | | | | | | | | | | | | | | | | |  
AGUUCGCUCUUGUACUACCACC 5'  
AT4G24330.1 153 174  
unknown protein

SRNA\_AG01\_SoLexa\_Mi2008\_1\_36276\_hit1

5' UG-AGGAGAGAGUGAUUUUCUGU  
| | | | | | | | | | | | | | | | | | | | | | | | | | | | | | | | | | | | | | | |  
ACGUCCUCUCUGACUAAAAGACU 5'  
AT4G24390.1 2235 2257  
transport inhibitor response-like protein

SRNA\_AG01\_SoLexa\_Mi2008\_13\_14047\_hit1

5' GAGGAAGACGAGGAGGAAGAGGA  
| | | | | | | | | | | | | | | | | | | | | | | | | | | | | | | | | | | | | | | |  
CUCCUUCUUCUCCUCCUCCUCCU 5'  
AT4G24390.2 223 245  
transport inhibitor response-like protein

SRNA\_AG01\_SoLexa\_Mi2008\_1\_7006\_hit1

5' CAUCAUCAUCAUCACAGAAG  
| | | | | | | | | | | | | | | | | | | | | | | | | | | | | | | | | | | | | | | |  
CGAGU-GUAGUAGUGUCUUC 5'  
AT4G24690.1 2174 2192  
unknown protein

SRNA\_AG01\_SoLexa\_Mi2008\_6\_22289\_hit1

5' UAGC-CUGUACGAUGAUGUUGU  
| | | | | : | | | | | | | | | | | | | | | | | | | | | | | | | | | | | | | | | |  
AUCGUGGC-UGCUACUACAACA 5'  
AT4G24920.1 256 276  
PROTEIN TRANSPORT PROTEIN SEC61 GAMMA SUBUNIT -like

SRNA\_AG01\_SoLexa\_Mi2008\_1\_50495\_hit1

5' UUGAGACCCGACGCGAUGGC  
| | | | | | | | | | | | | | | | | | | | | | | | | | | | | | | | | | | | | | | |  
AACUCUGGGCUG-GCUACGA 5'  
AT4G25000.1 760 778  
alpha-amylase like protein

SRNA\_AG01\_SoLexa\_Mi2008\_2\_28261\_hit2

5' UCAGC-ACGGUUACUCGUUGGA  
| | | | | | | | | | | | | | | | | | | | | | | | | | | | | | | | | | | | | | | |  
AGUCGAU-CCAAUGAGGAACCU 5'  
AT4G25340.1 43 63  
unknown protein

SRNA\_AG01\_SoLexa\_Mi2008\_3\_19661\_hit1

5' UACCAAAGGAUCUGCCACUCGC  
: | | | | | | | | | | | | | | | | | | | | | | | | | | | | | | | | | | | | | | | |  
GUGGUUUCGUAGACGGUUAGCG 5'  
AT4G25710.1 1027 1048  
putative protein

leaves\_1sup\_AG01\_SoLexa\_Mi\_Cell\_2008\_hit\_target\_site.txt

SRNA\_AG01\_SoLexa\_Mi2008\_2\_5430\_hit1

5' CACCAAUAGAUCAUAAAAU  
 |||||:|||||||  
 UCGGUUUAUUUAGUUAUUUA 5'  
 AT4G25710.1 1250 1268  
 putative protein

SRNA\_AG01\_SoLexa\_Mi2008\_2\_48800\_hit1

5' UUCAGUACAGGUUUCUUGUA  
 ||| |||||  
 AAG-CAUUGUCCAAAGUAACCA 5'  
 AT4G25730.1 2084 2104  
 unknown protein

SRNA\_AG01\_SoLexa\_Mi2008\_1\_9509\_hit1

5' CUAACGAUGAGGAUGAUGAA  
 ||||| |||||  
 AAUUCCUACUCCUACUACUU 5'  
 AT4G25900.1 1116 1136  
 possible apospory-associated like protein

SRNA\_AG01\_SoLexa\_Mi2008\_1\_33495\_hit1

5' UCUGCAGAAAUGGUGGGAGAC  
 |||||  
 AGACGUCUUUACCACCCUCUG 5'  
 AT4G26400.2 64 84  
 unknown protein

SRNA\_AG01\_SoLexa\_Mi2008\_1\_33495\_hit1

5' UCUGCAGAAAUGGUGGGAGAC  
 |||||  
 AGACGUCUUUACCACCCUCUG 5'  
 AT4G26400.1 87 107  
 unknown protein

SRNA\_AG01\_SoLexa\_Mi2008\_1\_3\_hit25

5' AAAAAAAAAAAAAAGAAAGA  
 ||||| |||||  
 UUUUUUUUUUUUUUUUUUAG 5'  
 AT4G27020.1 1723 1740  
 unknown protein

SRNA\_AG01\_SoLexa\_Mi2008\_19\_10930\_hit1

5' CUCCUCGCCAUAGUU-UUCGCCUUU  
 ||||| ||||| ||| |||||  
 GAGGAGCAGUAUCAACAAG-GGAAA 5'  
 AT4G27430.2 1747 1770  
 COP1-interacting protein 7 (CIP7)

SRNA\_AG01\_SoLexa\_Mi2008\_1\_3966\_hit1

5' CAAAAUCAAAGAUUCUUA  
 ||||| |||||  
 UUUUUUAUGUUUCUAAGAAUG 5'  
 AT4G27430.1 3567 3587  
 COP1-interacting protein 7 (CIP7)

SRNA\_AG01\_SoLexa\_Mi2008\_1\_50088\_hit1

5' UUGAAGGAUCAUCAGUGUGAAA  
 ||||| ||||| |||  
 AACUCCUAGUA-UCACUCUUG 5'  
 AT4G27710.1 1520 1540  
 cytochrome P450 - like protein

leaves\_1sup\_AG01\_SoLexa\_Mi\_Cell\_2008\_hit\_target\_site.txt

SRNA\_AG01\_SoLexa\_Mi2008\_7\_8338\_hit9

5' CGAAGG-UGCAUAGUGAGAA  
 ||||| | |||||||||  
 UCUUCCUA-GUAUCACUCUU 5'  
 AT4G27710.1 1521 1539  
 cytochrome P450 - like protein

SRNA\_AG01\_SoLexa\_Mi2008\_1\_1573\_hit9

5' ACGAAGG-UGCAUAGUGAGAA  
 | ||||| | |||||||||  
 UUCUCCUA-GUAUCACUCUU 5'  
 AT4G27710.1 1521 1540  
 cytochrome P450 - like protein

SRNA\_AG01\_SoLexa\_Mi2008\_1\_50087\_hit1

5' UUGAAGGAUCAUCAGUGUGAA  
 ||||||||| |||| |||  
 AACUCCUAGUA-UCACUCUU 5'  
 AT4G27710.1 1521 1540  
 cytochrome P450 - like protein

SRNA\_AG01\_SoLexa\_Mi2008\_1\_10208\_hit1

5' CUAGC-GAGAAAACUCUUUC  
 | || |||||||||  
 GCGCGUCUCUUUUGAGAAAG 5'  
 AT4G27940.1 458 477  
 unknown protein

SRNA\_AG01\_SoLexa\_Mi2008\_8\_15580\_hit6

5' GUCAAAGUGAGAU-AUGGUUUU  
 ||||||||| | |||||||  
 CAGUUUCACUC-ACGACCAAAA 5'  
 AT4G28250.2 476 496  
 putative Expansin (AtEXPB3) /allergen protein

SRNA\_AG01\_SoLexa\_Mi2008\_1\_43726\_hit3

5' UGGUUAAGGAGAUAGACUUGA  
 ||||| || |||||||||  
 ACCAAAUC-UCUAUCUGAACC 5'  
 AT4G28490.1 86 105  
 receptor-like protein kinase 5 precursor (RLK5)

SRNA\_AG01\_SoLexa\_Mi2008\_1\_5817\_hit1

5' CACUGGUUGGUUGGAUAGU  
 ||||||||| ||||:|  
 GUGACCAACCAAACUAUUA 5'  
 AT4G28940.1 321 339  
 putative protein

SRNA\_AG01\_SoLexa\_Mi2008\_1\_49711\_hit26

5' UUCUCAACAAUG-C-AUCAUA  
 ||||||||| | ||| ||  
 AAGAGUUGUUACAGUUAGAAU 5'  
 AT4G29520.1 373 393  
 unknown protein

SRNA\_AG01\_SoLexa\_Mi2008\_16\_13022\_hit1

5' CUUGGUGGUUAGUGGGCUAA  
 |||||||||:||| |||||  
 GAACCACCGAGUCA-CCGAUU 5'  
 AT4G29900.1 2680 2699

leaves\_1sup\_AG01\_SoLexa\_Mi\_Cell\_2008\_hit\_target\_site.txt

SRNA\_AG01\_SoLexa\_Mi2008\_3\_5873\_hit1

5' CAGAAAAGAGGUAACGAG  
| | | | | | | | | | | | | | | | | | :  
CUCUUUUCUCCAUUUGCAU 5'  
AT4G29900.1 3272 3290

SRNA\_AG01\_SoLexa\_Mi2008\_8\_52273\_hit1

5' UUGGCAAGUUAGAGGAUGUG-UC  
| | | | | | | | | | | | | | | | | | | |  
AACCGUUCAAGCUCCUAGACGAG 5'  
AT4G30190.1 1415 1437  
H<sup>+</sup>-transporting ATPase type 2, plasma membrane

SRNA\_AG01\_SoLexa\_Mi2008\_12\_41443\_hit21

5' UGGCGAUUUCAGCUCUUCU  
| : | | | | | : | | | | | | | | | | | | | |  
AUCGCUAGAGUCGAGAAGA 5'  
AT4G30190.1 2869 2887  
H<sup>+</sup>-transporting ATPase type 2, plasma membrane

SRNA\_AG01\_SoLexa\_Mi2008\_2\_13419\_hit2

5' GAAGAAGAAGAAGACACUU  
| | | | | | | | | | | | | | | | | | | |  
CUUCUUCUUCUUCUGUUUU 5'  
AT4G30190.1 3021 3039  
H<sup>+</sup>-transporting ATPase type 2, plasma membrane

SRNA\_AG01\_SoLexa\_Mi2008\_7\_353\_hit2

5' AAAGAAGAAGAUAAAGCAU  
| | | | | | | | | | | | | | | | | | | |  
UUUCUUCUUCUAAUUC-UA 5'  
AT4G30190.1 3256 3273  
H<sup>+</sup>-transporting ATPase type 2, plasma membrane

SRNA\_AG01\_SoLexa\_Mi2008\_1\_173\_hit2

5' AAAAGAAGAAGAUAAAGCAU  
| | | | | | | | | | | | | | | | | | | |  
UUUUCUUCUUCUAAUUC-UA 5'  
AT4G30190.1 3256 3274  
H<sup>+</sup>-transporting ATPase type 2, plasma membrane

SRNA\_AG01\_SoLexa\_Mi2008\_1\_16281\_hit2

5' UAAAAAGAAGAAGAUAAAGCAU  
: | | | | | | | | | | | | | | | | | | | |  
GUUUUUCUUCUUCUAAUUC-UA 5'  
AT4G30190.1 3256 3276  
H<sup>+</sup>-transporting ATPase type 2, plasma membrane

SRNA\_AG01\_SoLexa\_Mi2008\_3\_53531\_hit4

5' UUGUGAAUCA-GGUGUUUUAAU  
| : | | | | | | | | | | | | | | | | | | | |  
AGCACUUCGUUCCACAAAUA 5'  
AT4G30210.2 1447 1468  
NADPH-ferrihemoprotein reductase (ATR2)

SRNA\_AG01\_SoLexa\_Mi2008\_1\_45260\_hit2

5' UGUGGACC-AAAAUAGAUGGUA  
| | | | | | | | | | | | | | | | | | | |  
ACACAUGGCUUUU-UCUACCAU 5'  
AT4G30210.2 451 471  
NADPH-ferrihemoprotein reductase (ATR2)

SRNA\_AG01\_SoLexa\_Mi2008\_1\_13420\_hit2

leaves\_1sup\_AG01\_SoLexa\_Mi\_Cell\_2008\_hit\_target\_site.txt

5' GAAG-AAGAAGAAGA-CUCUU  
||||| ||||||||| |||||:  
CUUCCUUCUUCUUCUAGAGAG 5'  
AT4G30210.2 61 81  
NADPH-ferrihemoprotein reductase (ATR2)

SRNA\_AG01\_SoLexa\_Mi2008\_3\_11393\_hit1  
5' CUGA-A-GUGUGCUGUUGUUGCU  
||||| | ||||||| |||||||||  
GACUCUGCACACAACAACAACGA 5'  
AT4G30250.1 253 275  
putative protein

SRNA\_AG01\_SoLexa\_Mi2008\_3\_1034\_hit1  
5' AAUCAAGGCAAGAAUCUUC  
||||||| |||||||  
UUAGUCCAUUCUUAGAUC 5'  
AT4G30250.1 477 495  
putative protein

SRNA\_AG01\_SoLexa\_Mi2008\_3\_12806\_hit1  
5' CUUGAUUUC-CAGAUGUAUUAU  
||||||| |||||||||  
UAACUUAUAGAGUCUACAUUAA 5'  
AT4G30290.1 7 28  
xyloglucan endo-1,4-beta-D-glucanase-like protein

SRNA\_AG01\_SoLexa\_Mi2008\_1\_53875\_hit1  
5' UUUAAACAGGUAAAGAAAAACAG  
||||| ||||||||| ||||| ||  
AAAUUAGUCCAUUU-UUUUU-UC 5'  
AT4G30350.1 113 133  
unknown protein

SRNA\_AG01\_SoLexa\_Mi2008\_2\_116\_hit3  
5' AAA-AAGAUUAGAGAGAUAG  
|| ||||||||| ||||  
GUUCUUCUUAUUCUCUC-AUC 5'  
AT4G30350.1 416 434  
unknown protein

SRNA\_AG01\_SoLexa\_Mi2008\_2\_13419\_hit2  
5' GAAGAAGAAGAAGAC-ACUU  
||||||||||| ||||  
CUUCUUCUUCUUCUGCUGCU 5'  
AT4G30350.1 571 590  
unknown protein

SRNA\_AG01\_SoLexa\_Mi2008\_1\_1549\_hit1  
5' ACCGGAGAAGAAGAAGUAGAC  
||||||||||| ||||  
CUGCCUCUUCUUCUUCUUCUG 5'  
AT4G30350.1 575 595  
unknown protein

SRNA\_AG01\_SoLexa\_Mi2008\_3\_13542\_hit2  
5' GAAGUUUUGAAGAUUUGCAGA  
||||| ||||||||| ||||  
CUUCUAAACUUCUAAACCUCU 5'  
AT4G30430.1 25 45  
senescence-associated protein homolog

SRNA\_AG01\_SoLexa\_Mi2008\_2\_43655\_hit2

leaves\_1sup\_AG01\_SoLexa\_Mi\_Cell\_2008\_hit\_target\_site.txt

5' UGGUGUGAAUUGCAGAAUCCCG  
|||||  
ACCA-ACUUAACGUCUUUGGGA 5'  
AT4G30800.1 63 83

SRNA\_AG01\_SoLexa\_Mi2008\_10\_43654\_hit2  
5' UGGUGUGAAUUGCAGAAUCCCG  
|||||  
ACCA-ACUUAACGUCUUUGGGA 5'  
AT4G30800.1 64 83

SRNA\_AG01\_SoLexa\_Mi2008\_1\_47319\_hit2  
5' UUAGACAAAAAAAAAAGUAUUG  
|||||  
AAUCU-UUUUUUUUCUAUAU 5'  
AT4G31240.1 86 105  
predicted protein

SRNA\_AG01\_SoLexa\_Mi2008\_1\_21944\_hit1  
5' UAGAUUGGGAGGAUAAGCU  
|||  
AUC-AACCCUCCUAUUCUA 5'  
AT4G31420.2 75 92  
unknown protein with zinc finger

SRNA\_AG01\_SoLexa\_Mi2008\_1\_21944\_hit1  
5' UAGAUUGGGAGGAUAAGCU  
|||  
AUC-AACCCUCCUAUUCUA 5'  
AT4G31420.1 78 95  
unknown protein with zinc finger

SRNA\_AG01\_SoLexa\_Mi2008\_3\_20883\_hit1  
5' UAGAAGAAUGGUGAUGUACGUG  
|||||  
AUCUUCUUACCCUAC-UG-AC 5'  
AT4G31500.1 1124 1143  
cytochrome P450 monooxygenase (CYP83B1)

SRNA\_AG01\_SoLexa\_Mi2008\_1\_32802\_hit1  
5' UCUACCAGCAGAAACGUCCUA  
|||||  
AGAUGGUCGUCUUUGCAGGAU 5'  
AT4G31500.1 1554 1574  
cytochrome P450 monooxygenase (CYP83B1)

SRNA\_AG01\_SoLexa\_Mi2008\_1\_27836\_hit1  
5' UCA-CGGUGUCUGAUUGAUCG  
|||  
AGUUGCCACGGACUAACUAGU 5'  
AT4G31500.1 522 542  
cytochrome P450 monooxygenase (CYP83B1)

SRNA\_AG01\_SoLexa\_Mi2008\_9\_14254\_hit8  
5' GAUGAUGAUGAUGAUGAUCUU  
|||||  
CUACUACUACUACUACUAGAA 5'  
AT4G31800.2 474 494

SRNA\_AG01\_SoLexa\_Mi2008\_1\_36323\_hit13  
5' UGAGGAUGAUGAUGAUGAUGA  
|||  
ACUACUACUACUACUACUAGA 5'

AT4G31800.2 475 495  
SRNA\_AG01\_SoLexa\_Mi2008\_1\_3079\_hit472  
5' AUGAUGAUGAUGAUGAUGAUGA  
|||  
GACUACUACUACUACUACUAGA 5'  
AT4G31800.2 475 496

SRNA\_AG01\_SoLexa\_Mi2008\_1\_45039\_hit3  
5' UG-UGAUGAUGAUGAUGAUGAUGA  
|||  
ACGACUACUACUACUACUACUAGA 5'  
AT4G31800.2 476 499

SRNA\_AG01\_SoLexa\_Mi2008\_9\_14254\_hit8  
5' GAUGAUGAUGAUGAUGAUCUU  
|||  
CUACUACUACUACUACUAGAA 5'  
AT4G31800.1 477 497

SRNA\_AG01\_SoLexa\_Mi2008\_1\_38921\_hit1  
5' UGCGGACGAUGAUGAUGAUGAU  
||| |||  
ACGACUACUACUACUACUACUA 5'  
AT4G31800.2 477 498

SRNA\_AG01\_SoLexa\_Mi2008\_7\_3078\_hit1  
5' AUGAUGAUGA-GAAUGAUGAU  
||| |||  
CACUACUACUACU-ACUACUA 5'  
AT4G31800.2 478 497

SRNA\_AG01\_SoLexa\_Mi2008\_1\_36323\_hit13  
5' UGAGGAUGAUGAUGAUGAUGA  
||| |||  
ACUACUACUACUACUACUAGA 5'  
AT4G31800.1 478 498

SRNA\_AG01\_SoLexa\_Mi2008\_1\_3079\_hit472  
5' AUGAUGAUGAUGAUGAUGAUGA  
|||  
GACUACUACUACUACUACUAGA 5'  
AT4G31800.1 478 499

SRNA\_AG01\_SoLexa\_Mi2008\_3\_39351\_hit1  
5' UGCUGAUGAUGCUGAUG-UGAC  
||| |||  
ACGACUACUACUACUACUACUA 5'  
AT4G31800.2 478 499

SRNA\_AG01\_SoLexa\_Mi2008\_1\_56092\_hit3  
5' UUUG-UGAUGAUGAUGAUGAUGA  
: ||| |||  
GAACGACUACUACUACUACU 5'  
AT4G31800.2 479 501

SRNA\_AG01\_SoLexa\_Mi2008\_1\_45039\_hit3  
5' UGU-GAUGAUGAUGAUGAUGAUGA  
||| |||  
ACAACGACUACUACUACUACU 5'  
AT4G31800.2 479 502

SRNA\_AG01\_SoLexa\_Mi2008\_1\_38921\_hit1

leaves\_1sup\_AG01\_SoLexa\_Mi\_Cell\_2008\_hit\_target\_site.txt

5' UGCGGACGAUGAUGAUGAUGAU  
||| || |||||  
ACGACUACUACUACUACUACUA 5'  
AT4G31800.1 480 501

SRNA\_AG01\_SoLexa\_Mi2008\_6\_14255\_hit369  
5' GAUGAUGAUGAUGAUGAUGAUGAU  
||| || |||||  
GUACAACGACUACUACUACUACUA 5'  
AT4G31800.2 480 503

SRNA\_AG01\_SoLexa\_Mi2008\_7\_3078\_hit1  
5' AUGAUGAUGA-GAAUGAUGAU  
||| || |||||  
CACUACUACUACU-ACUACUA 5'  
AT4G31800.1 481 500

SRNA\_AG01\_SoLexa\_Mi2008\_2\_31619\_hit1  
5' UCGCUGAUGAUGAUUGAUGAU  
||| || |||||  
UUCGACUACUACUA-CUACUA 5'  
AT4G31800.2 481 500

SRNA\_AG01\_SoLexa\_Mi2008\_1\_3079\_hit472  
5' AUGAUGAUGAUGAUGAUGAUGAUGA  
||| || |||||  
UACAACGACUACUACUACUACU 5'  
AT4G31800.2 481 502

SRNA\_AG01\_SoLexa\_Mi2008\_3\_39351\_hit1  
5' UGCUGAUGAUGCUGAUG-UGAC  
||| || |||||  
ACGACUACUACUACUACUACUA 5'  
AT4G31800.1 481 502

SRNA\_AG01\_SoLexa\_Mi2008\_1\_56092\_hit3  
5' UUUG-UGAUGAUGAUGAUGAUGAUGA  
: ||| |||||  
GAACGACUACUACUACUACUACU 5'  
AT4G31800.1 482 504

SRNA\_AG01\_SoLexa\_Mi2008\_1\_45039\_hit3  
5' UGU-GAUGAUGAUGAUGAUGAUGAUGA  
||| | |||||  
ACAACGACUACUACUACUACUACU 5'  
AT4G31800.1 482 505

SRNA\_AG01\_SoLexa\_Mi2008\_6\_14255\_hit369  
5' GAUGAUGAUGAUGAUGAUGAUGAUGAU  
||| || |||||  
GUACAACGACUACUACUACUACUA 5'  
AT4G31800.1 483 506

SRNA\_AG01\_SoLexa\_Mi2008\_2\_31619\_hit1  
5' UCGCUGAUGAUGAUUGAUGAU  
||| || |||||  
UUCGACUACUACU-ACUACUA 5'  
AT4G31800.1 484 503

SRNA\_AG01\_SoLexa\_Mi2008\_1\_3079\_hit472  
5' AUGAUGAUGAUGAUGAUGAUGAUGA  
||| || |||||  
UACAACGACUACUACUACUACU 5'

AT4G31800.1 484 505

SRNA\_AG01\_SoLexa\_Mi2008\_1\_35777\_hit6

5' UGAGAACAAUGAAGAAGUCGCU  
 ||||| |||||:|  
 UCUCUUUUUACUUCUUCAGCGG 5'

AT4G32285.2 117 138  
 unknown protein

SRNA\_AG01\_SoLexa\_Mi2008\_1\_28035\_hit2

5' UCAGAAGAGAAAGACUACCCU  
 ||||| ||||| || |||  
 AGUCUUCUCUUUC-GAAGGGU 5'

AT4G32285.1 1566 1585  
 unknown protein

SRNA\_AG01\_SoLexa\_Mi2008\_15\_11643\_hit2

5' CUG-AUUCUGCCAAGCCCGU  
 ||| ||||| ||||| :|  
 GACCUAAGACGGUUCGGCUA 5'

AT4G32285.1 1598 1617  
 unknown protein

SRNA\_AG01\_SoLexa\_Mi2008\_1\_28035\_hit2

5' UCAGAAGAGAAAGACUACCCU  
 ||||| ||||| || |||  
 AGUCUUCUCUUUC-GAAGGGU 5'

AT4G32285.2 1668 1687  
 unknown protein

SRNA\_AG01\_SoLexa\_Mi2008\_15\_11643\_hit2

5' CUG-AUUCUGCCAAGCCCGU  
 ||| ||||| ||||| :|  
 GACCUAAGACGGUUCGGCUA 5'

AT4G32285.2 1700 1719  
 unknown protein

SRNA\_AG01\_SoLexa\_Mi2008\_2\_8711\_hit62

5' CGAUG-ACAAGCUUCAGAGCCUU  
 ||||| ||||| | |||||  
 GCUACCUGUUCGUUUUCUCGGAA 5'

AT4G32285.1 480 502  
 unknown protein

SRNA\_AG01\_SoLexa\_Mi2008\_2\_8711\_hit62

5' CGAUG-ACAAGCUUCAGAGCCUU  
 ||||| ||||| | |||||  
 GCUACCUGUUCGUUUUCUCGGAA 5'

AT4G32285.2 582 604  
 unknown protein

SRNA\_AG01\_SoLexa\_Mi2008\_1\_2\_hit38

5' AAA-AAAAAAAAAAAAACCAU  
 ||| ||||| ||||| |||  
 UUUUUUUUUUUUUUUUCGUA 5'

AT4G32850.6 2921 2940  
 poly(A) polymerase like protein

SRNA\_AG01\_SoLexa\_Mi2008\_1\_2\_hit38

5' AAA-AAAAAAAAAAAAACCAU  
 ||| ||||| ||||| |||  
 UUUUUUUUUUUUUUUUCGUA 5'

AT4G32850.5 2934 2953

poly(A) polymerase like protein

SRNA\_AG01\_SoLexa\_Mi2008\_1\_2\_hit38

5' AAA-AAAAAAAAAAAAACCAU  
||| |||||  
UUUAUUUUUUUUUUUCGUA 5'

AT4G32850.7 3124 3143

poly(A) polymerase like protein

SRNA\_AG01\_SoLexa\_Mi2008\_1\_2\_hit38

5' AAA-AAAAAAAAAAAAACCAU  
||| |||||  
UUUAUUUUUUUUUUUCGUA 5'

AT4G32850.4 3430 3449

poly(A) polymerase like protein

SRNA\_AG01\_SoLexa\_Mi2008\_3\_35894\_hit1

5' UGAGA-GCAGAGAAAGAGAGU  
||||| | |||||  
ACUCUUC-UCUCUUUCUCUCU 5'

AT4G32850.9 66 85

poly(A) polymerase like protein

SRNA\_AG01\_SoLexa\_Mi2008\_2\_411\_hit5

5' AAAGAUGAAGAGAGAAAGAGA  
||| |||||  
AGUCU-CUUCUCUCUUUCUCU 5'

AT4G32850.9 68 87

poly(A) polymerase like protein

SRNA\_AG01\_SoLexa\_Mi2008\_3\_35894\_hit1

5' UGAGA-GCAGAGAAAGAGAGU  
||||| | |||||  
ACUCUUC-UCUCUUUCUCUCU 5'

AT4G32850.8 74 93

poly(A) polymerase like protein

SRNA\_AG01\_SoLexa\_Mi2008\_2\_411\_hit5

5' AAAGAUGAAGAGAGAAAGAGA  
||| |||||  
AGUCU-CUUCUCUCUUUCUCU 5'

AT4G32850.8 76 95

poly(A) polymerase like protein

SRNA\_AG01\_SoLexa\_Mi2008\_1\_21387\_hit3

5' UAGAGGAUACAA-ACGGGAUGU  
||||| || ||| ||  
AUCUCCUAUGUUGUGGCCU-CA 5'

AT4G32910.1 172 192

SRNA\_AG01\_SoLexa\_Mi2008\_3\_13421\_hit1

5' GAAGAAGAAGAUGAUG-UUGAU  
|||||: ||| || ||  
CUUCUUCUUCUAUUACGAA-UA 5'

AT4G32980.1 564 584

homeobox gene ATH1

SRNA\_AG01\_SoLexa\_Mi2008\_1\_17946\_hit13

5' UAAGAUUUCAGACAACACAAU  
|||||: |||||  
CUUCUAAAGUCUGUUGUGUUG 5'

AT4G32980.1 635 655

homeobox gene ATH1

leaves\_1sup\_AG01\_SoLexa\_Mi\_Cell\_2008\_hit\_target\_site.txt

SRNA\_AG01\_SoLexa\_Mi2008\_1\_25259\_hit4  
5' UAU-GAAGUGCAAGUUGAUGGA  
||| ||||||||||||||||| |||  
AUAUCUUCACGUUCAAC-ACCG 5'  
AT4G33050.4 808 828  
unknown protein

SRNA\_AG01\_SoLexa\_Mi2008\_1\_25259\_hit4  
5' UAU-GAAGUGCAAGUUGAUGGA  
||| ||||||||||||||||| |||  
AUAUCUUCACGUUCAAC-ACCG 5'  
AT4G33050.2 922 942  
unknown protein

SRNA\_AG01\_SoLexa\_Mi2008\_7\_35034\_hit1  
5' UGAAUGCAGUUUCAGGAAU-AUC  
||| |||||||||||||||||:| || |||  
ACUUACGUCAAAGUUC-UACUAG 5'  
AT4G33210.1 1912 1933  
unknown protein

SRNA\_AG01\_SoLexa\_Mi2008\_1\_22977\_hit1  
5' UAGGCUCCAAUGAUGAUGAUC  
:||||||||||||||||| | ||  
GUCCGAGGUUACUACU-C-AG 5'  
AT4G33210.1 2335 2353  
unknown protein

SRNA\_AG01\_SoLexa\_Mi2008\_4\_4778\_hit3  
5' CAAGCUGGAGAUUGUGAUU  
||||| |||||||||||||||||:  
GUUCG-CCUCUAACACUAUG 5'  
AT4G33300.2 1099 1117  
putative protein

SRNA\_AG01\_SoLexa\_Mi2008\_1\_27163\_hit3  
5' UCAAGCUGGAGAUUGUGAUA  
||||| |||||||||||||||||  
AGUUCG-CCUCUAACACUAU 5'  
AT4G33300.2 1100 1118  
putative protein

SRNA\_AG01\_SoLexa\_Mi2008\_1\_55692\_hit1  
5' UUUGCGGUGG-GGCUGGUGGU  
|:||||||||| || |||||||  
AGACCGCCACCACC-ACCACCA 5'  
AT4G33300.2 113 133  
putative protein

SRNA\_AG01\_SoLexa\_Mi2008\_3\_13895\_hit1  
5' GAGAAACCACCGAUGGA-GAUGGU  
||||||||| ||||||| || |||  
CUCUUUGGUGUCUACCUACUCCA 5'  
AT4G34140.1 629 652  
hypothetical protein

SRNA\_AG01\_SoLexa\_Mi2008\_2\_13419\_hit2  
5' GAAGAAGAAGAAGACACUU  
|||||||||||||||||  
CUUCUUCUUCUUCUGUCC 5'  
AT4G34160.1 385 403  
cyclin delta-3

leaves\_1sup\_AG01\_SoLexa\_Mi\_Cell\_2008\_hit\_target\_site.txt

SRNA\_AG01\_SoLexa\_Mi2008\_1\_46328\_hit1  
5' UUAAAUGGUGAUGAUCACGAUAACUU  
| | | | | | | | | | | | | | | | | | | | | |  
AAUUUACAACUAGUUGC-AU-GAA 5'  
AT4G34610.2 1156 1177  
Homeodomain - like protein

SRNA\_AG01\_SoLexa\_Mi2008\_1\_16210\_hit1  
5' GU-UUAAAUGGUGAUGAUCACGAUA  
| | | | | | | | | | | | | | | | | | | | | |  
CAGAAUUUACAACUAGUUGC-AU 5'  
AT4G34610.2 1159 1180  
Homeodomain - like protein

SRNA\_AG01\_SoLexa\_Mi2008\_1\_46328\_hit1  
5' UUAAAUGGUGAUGAUCACGAUAACUU  
| | | | | | | | | | | | | | | | | | | | | |  
AAUUUACAACUAGUUGC-A-UGAA 5'  
AT4G34610.1 1213 1234  
Homeodomain - like protein

SRNA\_AG01\_SoLexa\_Mi2008\_1\_16210\_hit1  
5' GU-UUAAAUGGUGAUGAUCACGAUA  
| | | | | | | | | | | | | | | | | | | | | |  
CAGAAUUUACAACUAGUUGC-AU 5'  
AT4G34610.1 1216 1237  
Homeodomain - like protein

SRNA\_AG01\_SoLexa\_Mi2008\_1\_44135\_hit7  
5' UGUAGAGGCUGAGAAAUUGUA  
| | | | | | | | | | | | | | | | | | | | | |  
ACA-CUCCGACUCUGUAACAA 5'  
AT4G34610.2 376 395  
Homeodomain - like protein

SRNA\_AG01\_SoLexa\_Mi2008\_1\_44135\_hit7  
5' UGUAGAGGCUGAGAAAUUGUA  
| | | | | | | | | | | | | | | | | | | | | |  
ACA-CUCCGACUCUGUAACAA 5'  
AT4G34610.1 433 452  
Homeodomain - like protein

SRNA\_AG01\_SoLexa\_Mi2008\_2\_46553\_hit2  
5' UUAAGCCAUGCAUGUG-UAA  
| | | | | | | | | | | | | | | | | | | | | |  
AAUUCGGUACGUUACUUA 5'  
AT4G34860.1 58 77  
invertase - like protein

SRNA\_AG01\_SoLexa\_Mi2008\_1\_46017\_hit2  
5' UGUUGGGACCAGAGUUAGCCA  
| | | | | | | | | | | | | | | | | | | | | |  
ACAAUCCUGGUCUCAAUCGGU 5'  
AT4G34870.1 443 463  
cyclophilin (AtCYP18-4)

SRNA\_AG01\_SoLexa\_Mi2008\_1\_27051\_hit1  
5' UCAAGAAU-ACAGAAGAAGGA  
| | | | | | | | | | | | | | | | | | | | | |  
AGUUCUUACU-UCUUCUCCU 5'  
AT4G34950.1 28 47  
unknown protein

leaves\_1sup\_AG01\_SoLexa\_Mi\_Cell\_2008\_hit\_target\_site.txt

SRNA\_AG01\_SoLexa\_Mi2008\_1\_34612\_hit1

5' UGAAGAUGAAGAUGAA-AUGUUAU  
| | | | | | | | | | | | | | | | | | | | | | :  
ACUUCUACUUCUUCUUCUACAUG 5'  
AT4G34950.1 70 92  
unknown protein

SRNA\_AG01\_SoLexa\_Mi2008\_2\_13457\_hit1

5' GAAGAUGAAGAUGAAG-UGGUA  
| | | | | | | | | | | | | | | | | | | | | | :  
CUUCUACUUCUUCUUCUA-CAU 5'  
AT4G34950.1 71 91  
unknown protein

SRNA\_AG01\_SoLexa\_Mi2008\_1\_38854\_hit6

5' UGCGAUUGAUG-AAGCUUCUGU  
| | | | | | | | | | | | | | | | | | | | | | : | | | |  
ACGCUAACU-CUUUCGAGGACA 5'  
AT4G34950.1 774 794  
unknown protein

SRNA\_AG01\_SoLexa\_Mi2008\_1\_7010\_hit1

5' CAUCAUGAACUUUGC-A-GGCU  
| | | | | | | | | | | | | | | | | | | | | | :  
GUAGUACUUGAAACGAUGCCUA 5'  
AT4G34950.1 855 876  
unknown protein

SRNA\_AG01\_SoLexa\_Mi2008\_1\_34418\_hit4

5' UGAA-CCUCAGGCGACCAAG  
| | | | | | | | | | | | | | | | | | | | | | :  
ACUUCGGAGGCCGUGGUUC 5'  
AT4G34970.1 352 371  
actin depolymerizing factor - like protein

SRNA\_AG01\_SoLexa\_Mi2008\_29\_22294\_hit1

5' UAGCCUUAUGCACACUCUGUU  
| | | | | | | | | | | | | | | | | | | | | | :  
AUCGGAAUACGUG-GCGACAU 5'  
AT4G35260.1 680 699  
NAD+ dependent isocitrate dehydrogenase subunit 1

SRNA\_AG01\_SoLexa\_Mi2008\_6\_4720\_hit1

5' CAAGCAUCACAGGAGUAAUA  
| | | | | | | | | | | | | | | | | | | | | | :  
GUUCGUAGUGUCCUCAUUAU 5'  
AT4G35630.1 1006 1025  
phosphoserine aminotransferase

SRNA\_AG01\_SoLexa\_Mi2008\_2\_1458\_hit7

5' ACAUAAGUGAUUAUGAUGCGGU  
| | | | | | | | | | | | | | | | | | | | | | : | | | |  
UGUUAUCAUUAUACUACUCCA 5'  
AT4G36020.1 1212 1232  
glycine-rich protein

SRNA\_AG01\_SoLexa\_Mi2008\_3\_330\_hit1

5' AAA-CU-CAGAAGAACAUUCU  
| | | | | | | | | | | | | | | | | | | | | | :  
UUUCGAUGUCUUCUUGUAAGG 5'  
AT4G36020.1 933 953  
glycine-rich protein

leaves\_1sup\_AG01\_SoLexa\_Mi\_Cell\_2008\_hit\_target\_site.txt

SRNA\_AG01\_SoLexa\_Mi2008\_1\_44974\_hit2

5' UGUGAGCGAUAACAAUGGCGU  
|||||  
ACACUCGCUAUUGUUACCGCA 5'  
AT4G36130.1 445 465  
putative ribosomal protein L8

SRNA\_AG01\_SoLexa\_Mi2008\_2\_4548\_hit7

5' CAAGA-AAUUUUAAAAGGGUUU  
|||||  
AUUCUCUUAAAAUUUCCCAA 5'  
AT4G36380.1 8 29  
cytochrome P450 (ROTUNDIFOLIA3)

SRNA\_AG01\_SoLexa\_Mi2008\_1\_4625\_hit1

5' CAAGAGA-UUUUAAAAGGGUUU  
|||||  
AUUCUCUUAAAAUUUCCCAA 5'  
AT4G36380.1 8 29  
cytochrome P450 (ROTUNDIFOLIA3)

SRNA\_AG01\_SoLexa\_Mi2008\_3\_4543\_hit1

5' CAAGAAAGAAUUUGCAUCU  
|||||  
GUUCUUUCUU-AACGUAAA 5'  
AT4G36880.1 763 780  
cysteine proteinase

SRNA\_AG01\_SoLexa\_Mi2008\_1\_41920\_hit17

5' UGGGAUGAUGAAGUUGAUGAU  
:|||||  
CUCCUACUACUUCUACUACUA 5'  
AT4G36930.1 146 166  
putative bHLH transcription factor (AtbHLH024) / SPATULA (SPT)

SRNA\_AG01\_SoLexa\_Mi2008\_1\_36323\_hit13

5' UGAGGAUGAUGAUGAUGAUGA  
|||||  
CCUCCUACUACUUCUACUACU 5'  
AT4G36930.1 147 167  
putative bHLH transcription factor (AtbHLH024) / SPATULA (SPT)

SRNA\_AG01\_SoLexa\_Mi2008\_3\_40895\_hit1

5' UGGAUGAUGAGAGA-GAGAU  
|||||:|  
ACCUACUACUCUUUGCUCUG 5'  
AT4G36930.1 321 340  
putative bHLH transcription factor (AtbHLH024) / SPATULA (SPT)

SRNA\_AG01\_SoLexa\_Mi2008\_3\_4568\_hit12

5' CAAGAAGAAGAUAGAGAA-CAAUG  
|||||  
GUUCUUCUUCUACU-UUAGUUAA 5'  
AT4G36930.1 99 120  
putative bHLH transcription factor (AtbHLH024) / SPATULA (SPT)

SRNA\_AG01\_SoLexa\_Mi2008\_1\_36137\_hit2

5' UGAGCGAGACCAACUUUCACG  
:|||||  
GCUCGCUCUGGUCGAAA-UGC 5'  
AT4G37120.1 102 121  
step II splicing factor like protein

leaves\_1sup\_AG01\_SoLexa\_Mi\_Cell\_2008\_hit\_target\_site.txt

SRNA\_AG01\_SoLexa\_Mi2008\_2\_56594\_hit1  
5' UUUUUGG-UUCGGGUCCAUC  
||||||| ||||| |  
AAAACCCAAGCCAAGUUAA 5'  
AT4G37120.1 239 258  
step II splicing factor like protein

SRNA\_AG01\_SoLexa\_Mi2008\_7\_25146\_hit3  
5' UAUCUAUUCGGGUUCGGGUUC  
||||||| || ||||| |||||  
AUAGAAAAACCCAAGCCAAG 5'  
AT4G37120.1 242 262  
step II splicing factor like protein

SRNA\_AG01\_SoLexa\_Mi2008\_23\_6630\_hit1  
5' CAGGUG-GAAGACAAGAUCGA  
| ||||| ||||| |||||  
GGCCACUCUUCUGUUCUAGCC 5'  
AT4G37390.1 348 368  
auxin-responsive GH3 homolog (CF4)

SRNA\_AG01\_SoLexa\_Mi2008\_6\_14255\_hit369  
5' GAUGAUGAUGAUGAUGAUGAU  
||||||| ||||| || |||||  
CUACUACUACAACUACAAC-ACUA 5'  
AT4G37590.1 1042 1064  
unknown protein

SRNA\_AG01\_SoLexa\_Mi2008\_1\_25400\_hit1  
5' UAUGAUGAUGAAGUUGAUGUU  
| ||||| ||||| |||||  
AAACUACUACUACAACUACAA 5'  
AT4G37590.1 1046 1066  
unknown protein

SRNA\_AG01\_SoLexa\_Mi2008\_9\_14254\_hit8  
5' GAUGAUGAUGAUGAUGA-UCUU  
||||||| ||||| |||||  
CUACUACUACUACUACUAGAC 5'  
AT4G37590.1 1078 1099  
unknown protein

SRNA\_AG01\_SoLexa\_Mi2008\_7\_11649\_hit2  
5' CUGAUUGAUGAUGAUGGAUCU  
||||| ||||| |||||:||||  
AACUA-CUACUACUACUUGA 5'  
AT4G37590.1 1079 1098  
unknown protein

SRNA\_AG01\_SoLexa\_Mi2008\_1\_51445\_hit1  
5' UUGCAUGAUGAUGAUGUUGAUGU  
|| ||||| ||||| |||||  
AA-GUACUACUACUA-CUACU 5'  
AT4G37590.1 1083 1101  
unknown protein

SRNA\_AG01\_SoLexa\_Mi2008\_2\_4250\_hit1  
5' CAAAUGAAGCAGGACCACCAG  
||||||| ||||| |||||  
GUUUACUUCGUCCUGGUGGUC 5'  
AT4G37590.1 1126 1146  
unknown protein

leaves\_1sup\_AG01\_SoLexa\_Mi\_Cell\_2008\_hit\_target\_site.txt

SRNA\_AG01\_SoLexa\_Mi2008\_1\_351\_hit2

5' AAAGAAGAAAAACAGAUCU  
|||||  
UUUCUUCUUUUU-UCU-GA 5'  
AT4G37590.1 819 835  
unknown protein

SRNA\_AG01\_SoLexa\_Mi2008\_4\_4395\_hit1

5' CAACAUGUUUGAGGUGGAACAA  
||||| ||| |||||||  
GUUGUCAA-CUCCACCUUGUC 5'  
AT4G37750.1 426 446  
ovule development protein aintegumenta (ANT)

SRNA\_AG01\_SoLexa\_Mi2008\_7\_32730\_hit2

5' UCUAAG-GGCAUCACAGACCUGU  
||| || ||||||| |||  
AGACUCACCGUAGUGUCUGUACA 5'  
AT4G37750.1 513 535  
ovule development protein aintegumenta (ANT)

SRNA\_AG01\_SoLexa\_Mi2008\_1\_7065\_hit2

5' CAUCUAAG-GGCAUCACAGAC  
||||| || |||||||  
GUAGACUCACCGUAGUGUCUG 5'  
AT4G37750.1 517 537  
ovule development protein aintegumenta (ANT)

SRNA\_AG01\_SoLexa\_Mi2008\_19\_1471\_hit2

5' ACAUCUAAG-GGCAUCACAGAC  
||||| || |||||||  
AGUAGACUCACCGUAGUGUCUG 5'  
AT4G37750.1 517 538  
ovule development protein aintegumenta (ANT)

SRNA\_AG01\_SoLexa\_Mi2008\_12\_19173\_hit1

5' UACAAGGUGUUGU-GAAGUCUA  
||||| ||| :|||||  
AUGUCCACAACAGUUUCAGAA 5'  
AT4G37910.1 902 923  
heat shock protein 70 like protein

SRNA\_AG01\_SoLexa\_Mi2008\_1\_20804\_hit2

5' UAGAAAUGCACCGAAUACUU  
:||||| ||| |||  
GUCUUUACGUGGCUUGAU-AA 5'  
AT4G38200.1 3393 3412  
guanine nucleotide-exchange protein -like

SRNA\_AG01\_SoLexa\_Mi2008\_1\_45228\_hit1

5' UGUGCUGGAGCAAUUUC-AUG  
||| ||||||| ||| :  
ACA-GACCUCGUUAAAGGUUAU 5'  
AT4G38240.2 749 768  
glycosyltransferase like protein

SRNA\_AG01\_SoLexa\_Mi2008\_1\_172\_hit2

5' AA-AAGAAGAAGAUAAAGCA  
|| |||||||  
UUCUUCUUCUUAUUCAA 5'  
AT4G38420.1 32 51  
pectinesterase like protein

leaves\_1sup\_AG01\_SoLexa\_Mi\_Cell\_2008\_hit\_target\_site.txt

SRNA\_AG01\_SoLexa\_Mi2008\_3\_10033\_hit2

5' CUACUGAUGCC-CGCGUCGC  
| | | | | | | | | | | | | | | | | |  
GAUGACUA-GGUGCGCAGCG 5'  
AT4G38440.1 4120 4138  
unknown protein

SRNA\_AG01\_SoLexa\_Mi2008\_1\_36855\_hit2

5' UGAGUGUUGUGGUCAAUUGGG  
| | | | | | | | | | | | | | | | | |  
UGUCACAACACCAGUGUACCC 5'  
AT4G38540.1 692 712  
monooxygenase 2 (MO2)

SRNA\_AG01\_SoLexa\_Mi2008\_1\_20879\_hit2

5' UAGAAGAAGGAGAUGCGAUGAC  
| | | | | | | | | | | | | | | | | |  
AUCUUCUUCUUCUA--CUACUG 5'  
AT4G38840.1 152 171  
auxin-induced protein - like

SRNA\_AG01\_SoLexa\_Mi2008\_1\_2\_hit38

5' AAAAAAAAAAAAAAAAAACCAU  
| | | | | | | | | | | | | | | | | |  
AUCUUUUUUUUUUUUGGUA 5'  
AT4G38860.1 622 640  
putative auxin-induced protein

SRNA\_AG01\_SoLexa\_Mi2008\_1\_12944\_hit4

5' CUUGGGAGAGAGUA--GUACUAG  
| | | | | | | | | | | | | | | | | |  
GAACCCUCUCUCAUCCCAUUAUC 5'  
AT4G38940.1 278 300  
unknown protein

SRNA\_AG01\_SoLexa\_Mi2008\_1\_12954\_hit4

5' CUUGGGCGAGAGUA--GUAUAG  
| | | | | | | | | | | | | | | | | |  
GAACCCUCUCUCAUCCCAUUAUC 5'  
AT4G38940.1 278 300  
unknown protein

SRNA\_AG01\_SoLexa\_Mi2008\_2\_53577\_hit1

5' UUGUGCAUACGAAGAAUGGAU  
| | | | | | | | | | | | | | | | | |  
CACACGUAGGCUUCUU-CCUA 5'  
AT4G38940.1 353 372  
unknown protein

SRNA\_AG01\_SoLexa\_Mi2008\_3\_17219\_hit1

5' UAACAGAAUCCAGAUGAGAG  
: | | | | | | | | | | | | | | | | | |  
GUUGUCUUAAGGUGUACUCUG 5'  
AT4G39390.2 521 541  
unknown protein

SRNA\_AG01\_SoLexa\_Mi2008\_3\_17219\_hit1

5' UAACAGAAUCCAGAUGAGAG  
: | | | | | | | | | | | | | | | | | |  
GUUGUCUUAAGGUGUACUCUG 5'  
AT4G39390.1 599 619  
unknown protein

leaves\_1sup\_AG01\_SoLexa\_Mi\_Cell\_2008\_hit\_target\_site.txt

SRNA\_AG01\_SoLexa\_Mi2008\_1\_50104\_hit2

5' UUGA-AGGUCGCGAUUCUCCC  
||||| ||||||||| |||||  
AACUAUCCAGCGCUACGAAGGU 5'  
AT4G39670.1 617 638  
unknown protein

SRNA\_AG01\_SoLexa\_Mi2008\_4\_3653\_hit2

5' AUUGA-AGGUCGCGAUUCUCCC  
||||| ||||||||| |||||  
UAACUAUCCAGCGCUACGAAGG 5'  
AT4G39670.1 618 639  
unknown protein

SRNA\_AG01\_SoLexa\_Mi2008\_12\_12075\_hit1

5' CUGG-UCGAGGAAUCCUGGA  
||| || |||||||||  
UACCUAG-UCCUUAGGACCU 5'  
AT4G39980.1 725 743  
2-dehydro-3-deoxyphosphoheptonate aldolase

SRNA\_AG01\_SoLexa\_Mi2008\_1\_38872\_hit1

5' UGCGCCACCACGUUCCUGUGU  
||||| ||||||||| |||||  
ACGCGGUGGUGCAAGGACACA 5'  
AT5G01210.1 1162 1182  
anthranilate N-benzoyltransferase - like protein

SRNA\_AG01\_SoLexa\_Mi2008\_1\_34189\_hit1

5' UGAAA-CUCCAAGUACUGUCA  
||||| ||||||||| |||||  
ACUUUUGAGGGUUCAUGACACG 5'  
AT5G01540.1 524 545  
receptor like protein kinase

SRNA\_AG01\_SoLexa\_Mi2008\_1\_52782\_hit1

5' UUGGGUGAAGUAGUCGUCAUU  
||| ||||| |||||||||:  
AACC-ACUUCUUCAGCAGUAG 5'  
AT5G01930.1 551 570  
(1-4)-beta-mannan endohydrolase-like protein

SRNA\_AG01\_SoLexa\_Mi2008\_14\_41633\_hit1

5' UGGCUGCGGCAGUGGUCUUCG  
|||||:||||| ||| |||  
ACCGACGUCGUCACC-CGA-GC 5'  
AT5G02490.1 616 635  
dnaK-type molecular chaperone hsc70.1 - like

SRNA\_AG01\_SoLexa\_Mi2008\_10\_5525\_hit1

5' CACCGGACGAUCUUCU-CGA  
||| ||||||||| |||  
AUGGACUGCUAGAAGAUGCU 5'  
AT5G02780.2 107 126  
putative protein

SRNA\_AG01\_SoLexa\_Mi2008\_1\_13977\_hit25

5' GAGAU-AGCCAUGGAAAGGAU  
||||| ||||||||| |||||  
CUCUAUCUCGGUACCUCCUA 5'  
AT5G02780.2 73 94  
putative protein

leaves\_1sup\_AG01\_SoLexa\_Mi\_Cell\_2008\_hit\_target\_site.txt

sRNA\_AG01\_SoLexa\_Mi2008\_1\_14784\_hit24

5' GCUGGAGCAGUCAUAGAUGUC  
 |||||  
 AGACCUCGUCAGUA-CUGCAG 5'  
 AT5G02870.2 138 157  
 60S ribosomal protein - like

sRNA\_AG01\_SoLexa\_Mi2008\_1\_5053\_hit1

5' CAAGUUCUUGAAAUCA-GAAGUA  
 |||||  
 GUUCAAGAACUUU-GUAUUUCAU 5'  
 AT5G02960.1 619 640  
 unknown protein

sRNA\_AG01\_SoLexa\_Mi2008\_3\_35894\_hit1

5' UGAGAGCAGAGAAAGAGAGU  
 |||||  
 CCUCUC-UCUCUUUCUCUCC 5'  
 AT5G03290.1 7 25  
 putative isocitrate dehydrogenase (NAD+) like protein

sRNA\_AG01\_SoLexa\_Mi2008\_2\_6093\_hit1

5' CAGAGGUUGAGGUUGACGUGC  
 |||||  
 UUCUCCAACUCCAACUGC-CG 5'  
 AT5G03350.1 85 104  
 protein kinase - like

sRNA\_AG01\_SoLexa\_Mi2008\_9\_14254\_hit8

5' GAUGAUGAUGAUGAUGAUC-UU  
 |||||  
 CUACUACUACUACUACUAGUA 5'  
 AT5G03545.1 292 313  
 unknown protein

sRNA\_AG01\_SoLexa\_Mi2008\_6\_14255\_hit369

5' GAUGAUGAUGAUGAUGAUGAUGAU  
 |||||  
 CUACUACUACUACUACUAGUA 5'  
 AT5G03545.1 292 315  
 unknown protein

sRNA\_AG01\_SoLexa\_Mi2008\_1\_14256\_hit8

5' GAUGAUGAUGAUGAUGAUGAUGUU  
 |||||  
 CUACUACUACUACUACUAGUA 5'  
 AT5G03545.1 292 315  
 unknown protein

sRNA\_AG01\_SoLexa\_Mi2008\_1\_36323\_hit13

5' UGAGGAUGAUGAUGAUGAUGAUGA  
 |||  
 ACUACUACUACUACUACUAGU 5'  
 AT5G03545.1 293 313  
 unknown protein

sRNA\_AG01\_SoLexa\_Mi2008\_1\_3079\_hit472

5' AUGAUGAUGAUGAUGAUGAUGAUGA  
 |||||  
 UACUACUACUACUACUACUAGU 5'  
 AT5G03545.1 293 314  
 unknown protein

leaves\_1sup\_AG01\_SoLexa\_Mi\_Cell\_2008\_hit\_target\_site.txt

SRNA\_AG01\_SoLexa\_Mi2008\_1\_45039\_hit3

5' UG-UGAUGAUGAUGAUGAUGAUGA  
||| ||||||||||||||||||||| |  
ACUACUACUACUACUACUACUAGU 5'  
AT5G03545.1 294 317  
unknown protein

SRNA\_AG01\_SoLexa\_Mi2008\_9\_14254\_hit8

5' GAUGAUGAUGAUGAUGAUCUU  
||||||||||||||||||| |  
CUACUACUACUACUACUACUA 5'  
AT5G03545.1 295 315  
unknown protein

SRNA\_AG01\_SoLexa\_Mi2008\_6\_14255\_hit369

5' GAUGAUGAUGAUGAUGAUGAUGAU  
:||||||||||||||||||| |  
UUACUACUACUACUACUACUA 5'  
AT5G03545.1 295 318  
unknown protein

SRNA\_AG01\_SoLexa\_Mi2008\_1\_14256\_hit8

5' GAUGAUGAUGAUGAUGAUGAUGUU  
:||||||||||||||||||| |  
UUACUACUACUACUACUACUA 5'  
AT5G03545.1 295 318  
unknown protein

SRNA\_AG01\_SoLexa\_Mi2008\_7\_3078\_hit1

5' AUGAUGAUGA-GAAUGAUGAU  
||||||||||| | |||||||||  
UACUACUACUAC-UACUACUA 5'  
AT5G03545.1 296 315  
unknown protein

SRNA\_AG01\_SoLexa\_Mi2008\_1\_36323\_hit13

5' UGAGGAUGAUGAUGAUGAUGA  
||| ||||||||||||||||||||| |  
ACUACUACUACUACUACUACU 5'  
AT5G03545.1 296 316  
unknown protein

SRNA\_AG01\_SoLexa\_Mi2008\_1\_3079\_hit472

5' AUGAUGAUGAUGAUGAUGAUGA  
||||||||||||||||||| |  
UACUACUACUACUACUACU 5'  
AT5G03545.1 296 317  
unknown protein

SRNA\_AG01\_SoLexa\_Mi2008\_1\_45039\_hit3

5' UGUGAUGAUGAUGAUGAUGAUGA  
:||||||||||||||||||| |  
UUACUACUACUACUACUACU 5'  
AT5G03545.1 296 318  
unknown protein

SRNA\_AG01\_SoLexa\_Mi2008\_1\_56092\_hit3

5' UUUG-UGAUGAUGAUGAUGAUGA  
||| ||||||||||||||||||||| |  
AAACUACUACUACUACUACU 5'  
AT5G03545.1 297 319  
unknown protein

leaves\_1sup\_AG01\_SoLexa\_Mi\_Cell\_2008\_hit\_target\_site.txt

SRNA\_AG01\_SoLexa\_Mi2008\_6\_14255\_hit369

5' GAUGAUGAUGAUGAUGAUGAUGAU  
|||:||||||||||||||||||  
CUAUUACUACUACUACUACUACUA 5'  
AT5G03545.1 298 321  
unknown protein

SRNA\_AG01\_SoLexa\_Mi2008\_1\_14256\_hit8

5' GAUGAUGAUGAUGAUGAUGAUGUU  
|||:||||||||||||||||||  
CUAUUACUACUACUACUACUACUA 5'  
AT5G03545.1 298 321  
unknown protein

SRNA\_AG01\_SoLexa\_Mi2008\_7\_3078\_hit1

5' AUGAUGAUGA-GAAUGAUGAU  
||||||| || |||||  
UACUACUACUACU-ACUACUA 5'  
AT5G03545.1 299 318  
unknown protein

SRNA\_AG01\_SoLexa\_Mi2008\_1\_3079\_hit472

5' AUGAUGAUGAUGAUGAUGAUGA  
|||:||||||||||||||||||  
ACCUAUUACUACUACUACUACU 5'  
AT5G03545.1 302 323  
unknown protein

SRNA\_AG01\_SoLexa\_Mi2008\_4\_14169\_hit1

5' GAUAAUGAUGAUGAAAGAUGA  
||||||| |||||  
CUAUUACUACUACUA-CUACU 5'  
AT5G03545.1 303 322  
unknown protein

SRNA\_AG01\_SoLexa\_Mi2008\_1\_39699\_hit1

5' UGGA-ACUGAUGAUGAUGAUGA  
||| | ||||||||||||||||  
ACCUAUUACUACUACUACUACU 5'  
AT5G03545.1 303 324  
unknown protein

SRNA\_AG01\_SoLexa\_Mi2008\_1\_45039\_hit3

5' UGUGAUGAUGAUGAUGAUGAUGA  
|| |||:||||||||||||||||||  
AC-CUAUUACUACUACUACUACU 5'  
AT5G03545.1 303 324  
unknown protein

SRNA\_AG01\_SoLexa\_Mi2008\_1\_2280\_hit1

5' AGUGGAUGAUGAUGAUGAUG  
| |||||:||||||||||||||  
UAACCUAUUACUACUACUAC 5'  
AT5G03545.1 306 325  
unknown protein

SRNA\_AG01\_SoLexa\_Mi2008\_1\_56092\_hit3

5' UUUGAUGAUGAUGAUGAUGAUGA  
||| |||:||||||||||||||  
AAAC-CUAUUACUACUACUACU 5'  
AT5G03545.1 306 326  
unknown protein

leaves\_1sup\_AG01\_SoLexa\_Mi\_Cell\_2008\_hit\_target\_site.txt

SRNA\_AG01\_SoLexa\_Mi2008\_1\_7077\_hit1

```
5' CAUCUCAGACCGAAUUGUC-CU
   ||| ||| ||| ||| ||| ||| |||
   GUAGAGUCUUGCUUAAAC-GUGA 5'
AT5G04240.1 2605 2625
zinc finger protein - like
```

SRNA\_AG01\_SoLexa\_Mi2008\_3\_28073\_hit1

```
5' UCAGAAUUCAGUCUGUUGGU
   :|| ||| ||| ||| ||| ||| |||
   GGU-UUAAGUCACAGACAUGCA 5'
AT5G04240.1 60 80
zinc finger protein - like
```

SRNA\_AG01\_SoLexa\_Mi2008\_2\_38066\_hit1

```
5' UGCAGCAGGUCUCGGUGUCGA
   |||| ||:||||| ||| |||
   ACGU-GUUCAGAGCCACAGCU 5'
AT5G04530.1 218 237
fatty acid elongase - like protein
```

SRNA\_AG01\_SoLexa\_Mi2008\_1\_7082\_hit4

```
5' CAUCUCCAGGA-ACCUCUUGAU
   | ||| ||| ||| ||| |||
   GGAGAGGUCCUAUG-AGAACUA 5'
AT5G05320.1 800 820
monooxygenase
```

SRNA\_AG01\_SoLexa\_Mi2008\_1\_646\_hit1

```
5' AACAGAAAAAAAACA-UGAU
   ||||:||||| ||| |||
   UUGUUUUUUUUUUGUAACUU 5'
AT5G05340.1 1138 1157
peroxidase
```

SRNA\_AG01\_SoLexa\_Mi2008\_13\_14779\_hit6

```
5' GCUGAGAAUCGAAAU-AGUU
   || ||| ||| ||| ||| |||
   AGA-UCUUAGCUUUUUAUCA 5'
AT5G05340.1 70 88
peroxidase
```

SRNA\_AG01\_SoLexa\_Mi2008\_6\_11866\_hit1

```
5' CUGGAACAG-AUUCUCGAAGGUC
   ||| ||| ||| ||| ||| |||
   GACCUUGUCGUU-AGCUUCCAG 5'
AT5G05520.1 1061 1082
Unknown protein (MOP10.6)
```

SRNA\_AG01\_SoLexa\_Mi2008\_5\_4006\_hit2

```
5' CAAACCCUUCGAGCAUCUGUU
   ||| ||| ||| ||| ||| |||
   GUUUGGGAACGUCGUUGA-AA 5'
AT5G05640.1 803 822
putative protein
```

SRNA\_AG01\_SoLexa\_Mi2008\_1\_48514\_hit1

```
5' UUCAAGCUUCAGAUUCUUCUU
   ||| ||| ||| ||| ||| |||
   AAGUUCGAAGUCUA-G-GAAGAA 5'
AT5G05740.1 139 159
putative protein
```

leaves\_1sup\_AG01\_SoLexa\_Mi\_Cell\_2008\_hit\_target\_site.txt

SRNA\_AG01\_SoLexa\_Mi2008\_1\_48514\_hit1

5' UUCAAGCUUCAGAUUGCUCUUCUU  
 ||| |  
 AAGUUCGAAGUCUA-G-GAAGAA 5'  
 AT5G05740.2 294 314  
 putative protein

SRNA\_AG01\_SoLexa\_Mi2008\_1\_28782\_hit1

5' UCAUAAACAGGUGAAUGUCGGU  
 ||| |  
 AGUAAUUGUCCACUUACAGCCA 5'  
 AT5G06100.2 1070 1090  
 transcription factor MYB33 - like protein

SRNA\_AG01\_SoLexa\_Mi2008\_1\_28782\_hit1

5' UCAUAAACAGGUGAAUGUCGGU  
 ||| |  
 AGUAAUUGUCCACUUACAGCCA 5'  
 AT5G06100.3 1158 1178  
 transcription factor MYB33 - like protein

SRNA\_AG01\_SoLexa\_Mi2008\_38\_14830\_hit2

5' GGACUGAAGGGAGCUCCCU  
 ||| |  
 CCUUACUUCCCUCGAGGUC 5'  
 AT5G06100.2 1159 1177  
 transcription factor MYB33 - like protein

SRNA\_AG01\_SoLexa\_Mi2008\_19\_40112\_hit2

5' UGGACUGAAGGGAGCUCCCU  
 ||| |  
 ACCUUACUUCCCUCGAGGUC 5'  
 AT5G06100.2 1159 1178  
 transcription factor MYB33 - like protein

SRNA\_AG01\_SoLexa\_Mi2008\_705\_52065\_hit2

5' UUGGACUGAAGGGAGCUCCCU  
 ||| |  
 AACCUUACUUCCCUCGAGGUC 5'  
 AT5G06100.2 1159 1179  
 transcription factor MYB33 - like protein

SRNA\_AG01\_SoLexa\_Mi2008\_16\_52069\_hit1

5' UUGGACUGAAGGGAGCUCCCU  
 ||| |  
 AACCUUACUUCCCUCGAGGUC 5'  
 AT5G06100.2 1159 1179  
 transcription factor MYB33 - like protein

SRNA\_AG01\_SoLexa\_Mi2008\_7\_3717\_hit1

5' AUUGGACUGAAGGGAGCUCCCU  
 ||| |  
 UAACCUUACUUCCCUCGAGGUC 5'  
 AT5G06100.2 1159 1180  
 transcription factor MYB33 - like protein

SRNA\_AG01\_SoLexa\_Mi2008\_3349\_41018\_hit1

5' UGGAUUGAAGGGAGCUCUA  
 ||| |  
 ACCUUACUUCCCUCGAGGU 5'  
 AT5G06100.2 1160 1178  
 transcription factor MYB33 - like protein

leaves\_1sup\_AG01\_SoLexa\_Mi\_Cell\_2008\_hit\_target\_site.txt

SRNA\_AG01\_SoLexa\_Mi2008\_1621\_41020\_hit1

5' UGGAUUGAAGGGAGCUCUU  
| | | | | :  
ACCUUACUUCCUCGAGGU 5'  
AT5G06100.2 1160 1178  
transcription factor MYB33 - like protein

SRNA\_AG01\_SoLexa\_Mi2008\_24\_52064\_hit2

5' UUGGACUGAAGGGAGCUCCC  
| | | | | :  
AACCUUACUUCCUCGAGGU 5'  
AT5G06100.2 1160 1179  
transcription factor MYB33 - like protein

SRNA\_AG01\_SoLexa\_Mi2008\_7\_52068\_hit1

5' UUGGACUGAAGGGAGCUCUU  
| | | | | :  
AACCUUACUUCCUCGAGGU 5'  
AT5G06100.2 1160 1179  
transcription factor MYB33 - like protein

SRNA\_AG01\_SoLexa\_Mi2008\_1\_52243\_hit1

5' UUGGAUUGAAGGGAGCUCUU  
| | | | | :  
AACCUUACUUCCUCGAGGU 5'  
AT5G06100.2 1160 1179  
transcription factor MYB33 - like protein

SRNA\_AG01\_SoLexa\_Mi2008\_3416\_52245\_hit1

5' UUGGAUUGAAGGGAGCUCUA  
| | | | | :|  
AACCUUACUUCCUCGAGGU 5'  
AT5G06100.2 1160 1179  
transcription factor MYB33 - like protein

SRNA\_AG01\_SoLexa\_Mi2008\_870\_52246\_hit1

5' UUGGAUUGAAGGGAGCUCUU  
| | | | | :  
AACCUUACUUCCUCGAGGU 5'  
AT5G06100.2 1160 1179  
transcription factor MYB33 - like protein

SRNA\_AG01\_SoLexa\_Mi2008\_1\_3716\_hit1

5' AUUGGACUGAAGGGAGCUCCC  
| | | | | :  
UAACCUUACUUCCUCGAGGU 5'  
AT5G06100.2 1160 1180  
transcription factor MYB33 - like protein

SRNA\_AG01\_SoLexa\_Mi2008\_21\_12906\_hit1

5' CUUGGACUGAAGGGAGCUCCC  
| | | | | :  
UAACCUUACUUCCUCGAGGU 5'  
AT5G06100.2 1160 1180  
transcription factor MYB33 - like protein

SRNA\_AG01\_SoLexa\_Mi2008\_61\_55550\_hit1

5' UUUGGACUGAAGGGAGCUCUU  
| | | | | :  
UAACCUUACUUCCUCGAGGU 5'  
AT5G06100.2 1160 1180  
transcription factor MYB33 - like protein

leaves\_1sup\_AG01\_SoLexa\_Mi\_Cell\_2008\_hit\_target\_site.txt

SRNA\_AG01\_SoLexa\_Mi2008\_14\_55632\_hit1

5' UUUGGAUUGAAGGGAGCUCCU  
||||| |||||||||  
UAACCUUACUUCCCUCGAGGU 5'  
AT5G06100.2 1160 1180  
transcription factor MYB33 - like protein

SRNA\_AG01\_SoLexa\_Mi2008\_15\_52063\_hit3

5' UUUGACUGAAGGGAGCUCC  
||||| |||||||||  
AACCUUACUUCCCUCGAGG 5'  
AT5G06100.2 1161 1179  
transcription factor MYB33 - like protein

SRNA\_AG01\_SoLexa\_Mi2008\_52\_52244\_hit2

5' UUGGAUUGAAGGGAGCUCU  
||||| |||||||||:  
AACCUUACUUCCCUCGAGG 5'  
AT5G06100.2 1161 1179  
transcription factor MYB33 - like protein

SRNA\_AG01\_SoLexa\_Mi2008\_9\_55631\_hit1

5' UUUGGAUUGAAGGGAGCUCC  
||||| |||||||||  
UAACCUUACUUCCCUCGAGG 5'  
AT5G06100.2 1161 1180  
transcription factor MYB33 - like protein

SRNA\_AG01\_SoLexa\_Mi2008\_1201\_55633\_hit2

5' UUUGGAUUGAAGGGAGCUCU  
||||| |||||||||:  
UAACCUUACUUCCCUCGAGG 5'  
AT5G06100.2 1161 1180  
transcription factor MYB33 - like protein

SRNA\_AG01\_SoLexa\_Mi2008\_136\_14386\_hit1

5' GAUUGGACUGAAGGGAGCUCC  
||||| |||||||||  
AUAACCUUACUUCCCUCGAGG 5'  
AT5G06100.2 1161 1181  
transcription factor MYB33 - like protein

SRNA\_AG01\_SoLexa\_Mi2008\_3\_55549\_hit1

5' UUUGGACUGAAGGGAGCUC  
||||| |||||||||  
UAACCUUACUUCCCUCGAG 5'  
AT5G06100.2 1162 1180  
transcription factor MYB33 - like protein

SRNA\_AG01\_SoLexa\_Mi2008\_907\_55630\_hit3

5' UUUGGAUUGAAGGGAGCUC  
||||| |||||||||  
UAACCUUACUUCCCUCGAG 5'  
AT5G06100.2 1162 1180  
transcription factor MYB33 - like protein

SRNA\_AG01\_SoLexa\_Mi2008\_4\_13220\_hit2

5' CUUUGGAUUGAAGGGAGCUC  
||||| |||||||||  
AUAACCUUACUUCCCUCGAG 5'  
AT5G06100.2 1162 1181  
transcription factor MYB33 - like protein

leaves\_1sup\_AG01\_SoLexa\_Mi\_Cell\_2008\_hit\_target\_site.txt

SRNA\_AG01\_SoLexa\_Mi2008\_1\_14385\_hit1

5' GAUUGGACUGAAGGGAGCUC  
||||| |||||||||  
AUAACCUUACUCCUCGAG 5'  
AT5G06100.2 1162 1181  
transcription factor MYB33 - like protein

SRNA\_AG01\_SoLexa\_Mi2008\_5\_13219\_hit2

5' CUUUGGAUUGAAGGGAGCU  
||||| |||||||||  
AUAACCUUACUCCUCGA 5'  
AT5G06100.2 1163 1181  
transcription factor MYB33 - like protein

SRNA\_AG01\_SoLexa\_Mi2008\_38\_14830\_hit2

5' GGACUGAAGGGAGCUCCU  
||| |||||||||  
CCUUACUCCUCGAGGUC 5'  
AT5G06100.3 1247 1265  
transcription factor MYB33 - like protein

SRNA\_AG01\_SoLexa\_Mi2008\_19\_40112\_hit2

5' UGGACUGAAGGGAGCUCCU  
||||| |||||||||  
ACCUUACUCCUCGAGGUC 5'  
AT5G06100.3 1247 1266  
transcription factor MYB33 - like protein

SRNA\_AG01\_SoLexa\_Mi2008\_705\_52065\_hit2

5' UUGGACUGAAGGGAGCUCCU  
||||| |||||||||  
AACCUUACUCCUCGAGGUC 5'  
AT5G06100.3 1247 1267  
transcription factor MYB33 - like protein

SRNA\_AG01\_SoLexa\_Mi2008\_16\_52069\_hit1

5' UUGGACUGAAGGGAGCUCCU  
||||| |||||||||  
AACCUUACUCCUCGAGGUC 5'  
AT5G06100.3 1247 1267  
transcription factor MYB33 - like protein

SRNA\_AG01\_SoLexa\_Mi2008\_7\_3717\_hit1

5' AUUGGACUGAAGGGAGCUCCU  
||||| |||||||||  
UAACCUUACUCCUCGAGGUC 5'  
AT5G06100.3 1247 1268  
transcription factor MYB33 - like protein

SRNA\_AG01\_SoLexa\_Mi2008\_3349\_41018\_hit1

5' UGGAUUGAAGGGAGCUCUA  
||||| |||||||||:  
ACCUUACUCCUCGAGGU 5'  
AT5G06100.3 1248 1266  
transcription factor MYB33 - like protein

SRNA\_AG01\_SoLexa\_Mi2008\_1621\_41020\_hit1

5' UGGAUUGAAGGGAGCUCU  
||||| |||||||||:  
ACCUUACUCCUCGAGGU 5'  
AT5G06100.3 1248 1266  
transcription factor MYB33 - like protein

leaves\_1sup\_AG01\_Solexa\_Mi\_Cell\_2008\_hit\_target\_site.txt

SRNA\_AG01\_Solexa\_Mi2008\_24\_52064\_hit2

```
5' UUGGACUGAAGGGAGCUCCC
   ||||| |||
   AACCUUACUUCCUCGAGGU 5'
AT5G06100.3   1248   1267
transcription factor MYB33 - like protein
```

SRNA\_AG01\_Solexa\_Mi2008\_7\_52068\_hit1

```
5' UUGGACUGAAGGGAGCUCCU
   ||||| |||
   AACCUUACUUCCUCGAGGU 5'
AT5G06100.3   1248   1267
transcription factor MYB33 - like protein
```

SRNA\_AG01\_Solexa\_Mi2008\_1\_52243\_hit1

```
5' UUGGAUUGAAGGGAGCUCCU
   ||||| |||
   AACCUUACUUCCUCGAGGU 5'
AT5G06100.3   1248   1267
transcription factor MYB33 - like protein
```

SRNA\_AG01\_Solexa\_Mi2008\_3416\_52245\_hit1

```
5' UUGGAUUGAAGGGAGCUCUA
   ||||| |||:|
   AACCUUACUUCCUCGAGGU 5'
AT5G06100.3   1248   1267
transcription factor MYB33 - like protein
```

SRNA\_AG01\_Solexa\_Mi2008\_870\_52246\_hit1

```
5' UUGGAUUGAAGGGAGCUCUU
   ||||| |||:
   AACCUUACUUCCUCGAGGU 5'
AT5G06100.3   1248   1267
transcription factor MYB33 - like protein
```

SRNA\_AG01\_Solexa\_Mi2008\_1\_3716\_hit1

```
5' AUUGGACUGAAGGGAGCUCCC
   ||||| |||
   UAACCUUACUUCCUCGAGGU 5'
AT5G06100.3   1248   1268
transcription factor MYB33 - like protein
```

SRNA\_AG01\_Solexa\_Mi2008\_21\_12906\_hit1

```
5' CUUGGACUGAAGGGAGCUCCC
   ||||| |||
   UAACCUUACUUCCUCGAGGU 5'
AT5G06100.3   1248   1268
transcription factor MYB33 - like protein
```

SRNA\_AG01\_Solexa\_Mi2008\_61\_55550\_hit1

```
5' UUUGGACUGAAGGGAGCUCCU
   ||||| |||
   UAACCUUACUUCCUCGAGGU 5'
AT5G06100.3   1248   1268
transcription factor MYB33 - like protein
```

SRNA\_AG01\_Solexa\_Mi2008\_14\_55632\_hit1

```
5' UUUGGAUUGAAGGGAGCUCCU
   ||||| |||
   UAACCUUACUUCCUCGAGGU 5'
AT5G06100.3   1248   1268
transcription factor MYB33 - like protein
```

leaves\_1sup\_AG01\_SoLexa\_Mi\_Cell\_2008\_hit\_target\_site.txt

SRNA\_AG01\_SoLexa\_Mi2008\_15\_52063\_hit3

5' UUGGACUGAAGGGAGCUCC

||||| |||||||||

AACCUUACUUCCUCGAGG 5'

AT5G06100.3 1249 1267

transcription factor MYB33 - like protein

SRNA\_AG01\_SoLexa\_Mi2008\_52\_52244\_hit2

5' UUGGAUUGAAGGGAGCUCU

||||| |||||||||:

AACCUUACUUCCUCGAGG 5'

AT5G06100.3 1249 1267

transcription factor MYB33 - like protein

SRNA\_AG01\_SoLexa\_Mi2008\_9\_55631\_hit1

5' UUUGGAUUGAAGGGAGCUCC

||||| |||||||||

UAACCUUACUUCCUCGAGG 5'

AT5G06100.3 1249 1268

transcription factor MYB33 - like protein

SRNA\_AG01\_SoLexa\_Mi2008\_1201\_55633\_hit2

5' UUUGGAUUGAAGGGAGCUCU

||||| |||||||||:

UAACCUUACUUCCUCGAGG 5'

AT5G06100.3 1249 1268

transcription factor MYB33 - like protein

SRNA\_AG01\_SoLexa\_Mi2008\_136\_14386\_hit1

5' GAUUGGACUGAAGGGAGCUCC

||||| |||||||||

AUAACCUUACUUCCUCGAGG 5'

AT5G06100.3 1249 1269

transcription factor MYB33 - like protein

SRNA\_AG01\_SoLexa\_Mi2008\_3\_55549\_hit1

5' UUUGGACUGAAGGGAGCUC

||||| |||||||||

UAACCUUACUUCCUCGAG 5'

AT5G06100.3 1250 1268

transcription factor MYB33 - like protein

SRNA\_AG01\_SoLexa\_Mi2008\_907\_55630\_hit3

5' UUUGGAUUGAAGGGAGCUC

||||| |||||||||

UAACCUUACUUCCUCGAG 5'

AT5G06100.3 1250 1268

transcription factor MYB33 - like protein

SRNA\_AG01\_SoLexa\_Mi2008\_4\_13220\_hit2

5' CUUUGGAUUGAAGGGAGCUC

||||| |||||||||

AUAACCUUACUUCCUCGAG 5'

AT5G06100.3 1250 1269

transcription factor MYB33 - like protein

SRNA\_AG01\_SoLexa\_Mi2008\_1\_14385\_hit1

5' GAUUGGACUGAAGGGAGCUC

||||| |||||||||

AUAACCUUACUUCCUCGAG 5'

AT5G06100.3 1250 1269

transcription factor MYB33 - like protein

leaves\_1sup\_AG01\_SoLexa\_Mi\_Cell\_2008\_hit\_target\_site.txt

SRNA\_AG01\_SoLexa\_Mi2008\_5\_13219\_hit2

5' CUUUGGAUUGAAGGGAGCU  
| | | | | | | | | | | | | | | | | | | | | | | |  
AUAACCUUACUCCUCGA 5'  
AT5G06100.3 1251 1269  
transcription factor MYB33 - like protein

SRNA\_AG01\_SoLexa\_Mi2008\_1\_2\_hit38

5' AAAAAAAAAA-AAAAACCAU  
| | | | | | | | | | | | | | | | | | | | | | | |  
UUUUUUUUUUUUGUUUAGGUC 5'  
AT5G06100.2 137 156  
transcription factor MYB33 - like protein

SRNA\_AG01\_SoLexa\_Mi2008\_1\_2\_hit38

5' AAAAAAAAAA-AAAAACCAU  
| | | | | | | | | | | | | | | | | | | | | | | |  
UUUUUUUUUUUUGUUUAGGUC 5'  
AT5G06100.3 144 163  
transcription factor MYB33 - like protein

SRNA\_AG01\_SoLexa\_Mi2008\_1\_4084\_hit1

5' CAAAGAGGAGAGCA--CAAUGGAA  
| | | | | | | | | | | | | | | | | | | | | | | |  
AUUUCUCCUCUCGUAGGUUACCUU 5'  
AT5G06530.1 1300 1323  
ABC transporter like protein

SRNA\_AG01\_SoLexa\_Mi2008\_1\_4084\_hit1

5' CAAAGAGGAGAGCA--CAAUGGAA  
| | | | | | | | | | | | | | | | | | | | | | | |  
AUUUCUCCUCUCGUAGGUUACCUU 5'  
AT5G06530.3 1404 1427  
ABC transporter like protein

SRNA\_AG01\_SoLexa\_Mi2008\_1\_11845\_hit13

5' CUG-CUUCUUGGCCUCUGUGAU  
| | | | | | | | | | | | | | | | | | | | | | | |  
GACCGAAGAACAGGAGAC-CUA 5'  
AT5G07340.1 767 787  
calnexin homolog

SRNA\_AG01\_SoLexa\_Mi2008\_1\_3\_hit25

5' AAAAAAAAAAAAAAGAAAGA  
| | | | | | | | | | | | | | | | | | | | | | | |  
UUUUUUUUUUUUU-UUUAG 5'  
AT5G07440.3 137 154  
glutamate dehydrogenase 2 (GDH2)

SRNA\_AG01\_SoLexa\_Mi2008\_1\_1776\_hit10

5' AGAA-AAAAAAAAAAAAAAAAAU  
| | | | | | | | | | | | | | | | | | | | | | | |  
GCUUGUUUUUUUUUUUUUUUA 5'  
AT5G07440.3 138 159  
glutamate dehydrogenase 2 (GDH2)

SRNA\_AG01\_SoLexa\_Mi2008\_1\_3\_hit25

5' AAAAAAAAAAAAAAGAAAGA  
| | | | | | | | | | | | | | | | | | | | | | | |  
UUUUUUUUUUUUU-UUUAG 5'  
AT5G07440.1 162 179  
glutamate dehydrogenase 2 (GDH2)

leaves\_1sup\_AG01\_SoLexa\_Mi\_Cell\_2008\_hit\_target\_site.txt

SRNA\_AG01\_SoLexa\_Mi2008\_1\_1776\_hit10

5' AGAA-AAAAAAAAAAAAAAAAAAU  
||| ||||||||||||||||||||  
GCUUGUUUUUUUUUUUUUUUA 5'

AT5G07440.1 163 184  
glutamate dehydrogenase 2 (GDH2)

SRNA\_AG01\_SoLexa\_Mi2008\_5\_5595\_hit1

5' CACGAGAACGGGACU-ACAAAU  
||| |||||||||||||||| | ||||  
GUGCUCUUGCCCUGACU-UUUA 5'

AT5G07550.3 179 199  
glycine-rich protein PUTG1

SRNA\_AG01\_SoLexa\_Mi2008\_5\_5595\_hit1

5' CACGAGAACGGGACU-ACAAAU  
||| |||||||||||||||| | ||||  
GUGCUCUUGCCCUGACU-UUUA 5'

AT5G07550.1 186 206  
glycine-rich protein PUTG1

SRNA\_AG01\_SoLexa\_Mi2008\_2\_46801\_hit10

5' UUA-CAAAUAACCAUGGAC  
||| ||||| ||||||||  
AAUAGUUUUAGUGGUACCUA 5'

AT5G08139.1 209 228  
unknown protein

SRNA\_AG01\_SoLexa\_Mi2008\_29\_7893\_hit1

5' CCCAAUCAACUUCACACCAG  
||| |||||||| |||||||| |||  
GGGUUAGUUUAAGUAGUCGUC 5'

AT5G08139.1 647 667  
unknown protein

SRNA\_AG01\_SoLexa\_Mi2008\_19\_12362\_hit1

5' CUUACCCAAUCAACUUCAC  
||| |||||||| ||||||||  
GAA-GGGUUAGUUUAAGUAGUC 5'

AT5G08139.1 651 671  
unknown protein

SRNA\_AG01\_SoLexa\_Mi2008\_1\_34074\_hit1

5' UGAAAACGGGAAUGGAGCGAAGAA  
||| ||||:|||||||:|||||  
ACUUCUGCCUUUACCUCGUUUCUU 5'

AT5G08300.1 80 103  
succinyl-CoA-ligase alpha subunit

SRNA\_AG01\_SoLexa\_Mi2008\_1\_20620\_hit1

5' UACUGGGCAUGUGAAAUGGGU  
||| |||:|||||| |||||||  
AUGACCUGUACACUGUACCCA 5'

AT5G09220.1 635 655  
amino acid transport protein AAP2

SRNA\_AG01\_SoLexa\_Mi2008\_1\_28727\_hit1

5' UCAG-UGUGGUGUUGGUGCGAU  
||| |||| | |||||||||  
AGUCGACACAAGAACCACAGCUA 5'

AT5G09590.1 1917 1939  
heat shock protein 70 (Hsc70-5)

leaves\_1sup\_AG01\_SoLexa\_Mi\_Cell\_2008\_hit\_target\_site.txt

SRNA\_AG01\_SoLexa\_Mi2008\_1\_23048\_hit1

5' UAGG-GAGUAGCCACUGGAUGC  
    ||||| |||||||||:|||||  
    AUCCUCUCAUCGGUGGCCUACC 5'  
AT5G10170.1    1458    1479  
myo-inositol-1-phosphate synthase -like protein

SRNA\_AG01\_SoLexa\_Mi2008\_339\_11394\_hit3

5' CUGAAGUGUUUGGGGAACUC  
    ||||| |||||||||:|||||  
    AACUUCACAAACCCUCUUGAA 5'  
AT5G10180.1    124    144  
sulfate transporter

SRNA\_AG01\_SoLexa\_Mi2008\_1\_22796\_hit1

5' UAGGAUUAUUGAUUAUGUGU  
    ||||| ||||||||| ||||:|  
    AUCCUAUAACUA-AUCAUA 5'  
AT5G10180.1    1712    1729  
sulfate transporter

SRNA\_AG01\_SoLexa\_Mi2008\_1\_4581\_hit2

5' CAAGA-AUACUACAGCCAU-GGUC  
    ||||| |||||||||:|||||  
    GUUCUCUAUGAUGUCGGUGGCCAG 5'  
AT5G10180.1    590    613  
sulfate transporter

SRNA\_AG01\_SoLexa\_Mi2008\_6\_50680\_hit1

5' UUGAGGCAAAGAACAUCCGAA  
    ||||| |||||||||  
    CACUCC-UUUCUUGUAGGCUC 5'  
AT5G10180.1    931    950  
sulfate transporter

SRNA\_AG01\_SoLexa\_Mi2008\_1\_53946\_hit2

5' UUUAAACUGCAACAACUAAA  
    ||||| |||||||||  
    AAAU-GACGUUGUUGAAUAA 5'  
AT5G10210.1    736    754  
putative protein

SRNA\_AG01\_SoLexa\_Mi2008\_2\_43551\_hit1

5' UGGUGGUGACGUUGGUGGUGU  
    ||||| || |||||||||  
    UCCACCACUACCACCACCACCA 5'  
AT5G10550.1    1289    1310  
bromodomain protein - like

SRNA\_AG01\_SoLexa\_Mi2008\_2\_42329\_hit1

5' UGGGGAGGUGGUGAUGCG-GGU  
    ||||| ||||||||| |||||  
    ACCCUCCACCACUAC-CACCA 5'  
AT5G10550.1    1296    1316  
bromodomain protein - like

SRNA\_AG01\_SoLexa\_Mi2008\_1\_20849\_hit1

5' UAGAACCU-CGGUCGAGAAUG-GU  
    ||| ||||| ||||||||| ||  
    AUCGUGGAAGCCAGCUCUUACUCA 5'  
AT5G10760.1    1046    1069  
nucleoid DNA-binding protein cnd41 - like protein

leaves\_1sup\_AG01\_SoLexa\_Mi\_Cell\_2008\_hit\_target\_site.txt

SRNA\_AG01\_SoLexa\_Mi2008\_1\_4400\_hit1

5' CAACAUUUAGCGUCGUCUGC  
 |||||:|||||||  
 GUUGUAGAUCGCAGCAGACG 5'  
 AT5G10760.1 1367 1386  
 nucleoid DNA-binding protein cnd41 - like protein

SRNA\_AG01\_SoLexa\_Mi2008\_1\_13420\_hit2

5' GAAGAAGAAGAA-GACUCUU  
 ||||| |||||  
 CUUCUUCUUCUCCUGAGCC 5'  
 AT5G11390.1 7 26  
 unknown protein

SRNA\_AG01\_SoLexa\_Mi2008\_2\_40093\_hit1

5' UGGACUAACUACAUGCAAGGG  
 ||||| || |||||  
 ACCUGAUUGAUG-AC-UUCCG 5'  
 AT5G12930.1 1236 1254  
 unknown protein

SRNA\_AG01\_SoLexa\_Mi2008\_1\_44719\_hit2

5' UGUCGAUGGACUUGCUACUGAA  
 ||||| ||||| :|||  
 UCAGCUACCUGAUUGAUGACUU 5'  
 AT5G12930.1 1238 1259  
 unknown protein

SRNA\_AG01\_SoLexa\_Mi2008\_1\_3917\_hit1

5' CAAAAGAAGCAA-AAGUUUGUU  
 ||||| || || |||||  
 GUUUUCUUC-UUCUUAAAACAA 5'  
 AT5G13080.1 50 70  
 WRKY-like protein

SRNA\_AG01\_SoLexa\_Mi2008\_2\_22589\_hit1

5' UAGGAAAUAGUGAUUGAUGCAU  
 :||| ||||| ||||| |||  
 GUCCUUUACCACUAACUA-GUA 5'  
 AT5G13170.1 145 165  
 senescence-associated protein (SAG29)

SRNA\_AG01\_SoLexa\_Mi2008\_1\_17162\_hit1

5' UAACA-AGAGGAAGAAGAACGAU  
 |||| | ||||| ||||| ||  
 AUUGUCUCUCCUUCUUCUU-CUU 5'  
 AT5G13180.1 24 45  
 NAM-like protein

SRNA\_AG01\_SoLexa\_Mi2008\_1\_14\_hit1

5' AAAAAACAGAGAACAAGAAGA  
 ||||| |||||  
 CUUUUUUGUCUCUCCUUCUUCU 5'  
 AT5G13180.1 27 48  
 NAM-like protein

SRNA\_AG01\_SoLexa\_Mi2008\_1\_341\_hit1

5' AAAGAAACAGAGAGGAAGAU  
 ||| ||||| |||||  
 UUU-UUUGUCUCUCCUUCUU 5'  
 AT5G13180.1 30 48  
 NAM-like protein

leaves\_1sup\_AG01\_SoLexa\_Mi\_Cell\_2008\_hit\_target\_site.txt

SRNA\_AG01\_SoLexa\_Mi2008\_3\_10681\_hit1

5' CUCACGAUUUGAUUCCUCU  
|: |||||  
GGUUGC UAAACUAAAGGAGA 5'  
AT5G13180.1 383 402  
NAM-like protein

SRNA\_AG01\_SoLexa\_Mi2008\_12\_14067\_hit2

5' GAGG-A-UCCAUUGGAGGGCA  
|||| | |||||:|||||  
CUCCGUUAGGUAACUCCCGU 5'  
AT5G13190.1 462 482  
unknown protein

SRNA\_AG01\_SoLexa\_Mi2008\_1\_1732\_hit1

5' ACUGAGCAGCUUGAGGUGU-GA  
|||| | ||||| ||  
UGAC-CUUCGAACUCCACAACU 5'  
AT5G13400.1 1374 1394  
peptide transporter - like protein

SRNA\_AG01\_SoLexa\_Mi2008\_1\_13917\_hit1

5' GAGAAUAACGAGAAG-GAAG  
||||| |||  
AUCUUAUUGCUCUUCUCUUG 5'  
AT5G13400.1 2035 2054  
peptide transporter - like protein

SRNA\_AG01\_SoLexa\_Mi2008\_1\_22897\_hit1

5' UAGGCAUGUCUGAGGAUUGGU  
|||| ||| |||||  
AUCC-UACAUACUCCUAACCA 5'  
AT5G13400.1 2 21  
peptide transporter - like protein

SRNA\_AG01\_SoLexa\_Mi2008\_1\_52886\_hit1

5' UUGGUACUGAAG-UCGGCAAUAG  
||||| |||| | |||||  
AACCAUCACUUCUA-CCGUUAUC 5'  
AT5G13400.1 557 578  
peptide transporter - like protein

SRNA\_AG01\_SoLexa\_Mi2008\_1\_448\_hit2

5' AAAGCAUUUGCCAAGGAUGUU  
||||| ||| ||  
UUUCGUAAACGGUU-CUA-AA 5'  
AT5G13400.1 691 709  
peptide transporter - like protein

SRNA\_AG01\_SoLexa\_Mi2008\_5\_479\_hit1

5' AA-AGGAAGAAGAUUGGAGUU  
|| ||||| |||||:  
UUCUCCUUCUUCUAAACCUCAG 5'  
AT5G13420.1 149 170  
transaldolase - like protein

SRNA\_AG01\_SoLexa\_Mi2008\_1\_16815\_hit1

5' UAAAGGAGGAAGCAACCACUG  
||||:||||| |||  
CUUUCUCCUUCGUUG-UGAC 5'  
AT5G13420.1 892 911  
transaldolase - like protein

leaves\_1sup\_AG01\_SoLexa\_Mi\_Cell\_2008\_hit\_target\_site.txt

SRNA\_AG01\_SoLexa\_Mi2008\_1\_8580\_hit1

5' CGAGGAUU-GGUGGUACUUAGGU  
|| ||||| |||||||||||||:  
GC-CCUAAACCACCAUGAAUCCG 5'  
AT5G13490.2 1198 1219  
adenosine nucleotide translocator

SRNA\_AG01\_SoLexa\_Mi2008\_1\_8580\_hit1

5' CGAGGAUU-GGUGGUACUUAGGU  
|| ||||| |||||||||||||:  
GC-CCUAAACCACCAUGAAUCCG 5'  
AT5G13490.1 1262 1283  
adenosine nucleotide translocator

SRNA\_AG01\_SoLexa\_Mi2008\_21\_23402\_hit1

5' UAGGUCGAGCUUCAUUGGA  
||| |||||||||||||  
CUCCUGCUCGAAGUAACCU 5'  
AT5G13550.1 197 215  
sulfate transporter

SRNA\_AG01\_SoLexa\_Mi2008\_1\_21106\_hit1

5' UAGAC-GUAAAUUGGUGGCAU  
||||| ||||||||||||| |  
AUCUGGCAUUUAACCACCUUC 5'  
AT5G13550.1 426 446  
sulfate transporter

SRNA\_AG01\_SoLexa\_Mi2008\_5\_4303\_hit1

5' CAAAUUGGUG-CUUGCUCACAA  
||||||| | |||||||||||||  
GUUUAAACAAUAGAACGAGUUGUU 5'  
AT5G13680.1 2267 2289  
putative protein

SRNA\_AG01\_SoLexa\_Mi2008\_1\_6827\_hit1

5' CAUAAGCCCAAUCAUAAUGUG  
|| |||||||||||||||| ||  
GU-UUCGGGUUAGUAAU-CAG 5'  
AT5G13680.1 429 447  
putative protein

SRNA\_AG01\_SoLexa\_Mi2008\_1\_22432\_hit10

5' UAGCUAAAAAACCACCAUCGAG  
:||||||||||||||| |||  
GUCGAUUUUUUGGUGGUU-CUC 5'  
AT5G13740.1 817 837  
transporter-like protein

SRNA\_AG01\_SoLexa\_Mi2008\_1\_40339\_hit1

5' UGGAGAUGGAAGAUGAG-CC  
|||||||||||||| |||| ||  
ACCUCUACCUUCCACUCUGG 5'  
AT5G13930.1 876 895  
chalcone synthase (naringenin-chalcone synthase) (testa 4 protein) (sp|P13114)

SRNA\_AG01\_SoLexa\_Mi2008\_12\_10453\_hit13

5' CUAUAGUCCAGAUGAAUUGCU  
|||| ||||| |||||||||  
UAUUAU-AGGUCGACUUAACGA 5'  
AT5G14580.1 1748 1767  
polynucleotide phosphorylase

leaves\_1sup\_AG01\_SoLexa\_Mi\_Cell\_2008\_hit\_target\_site.txt

SRNA\_AG01\_SoLexa\_Mi2008\_2\_56340\_hit1  
5' UUUUAAUAGUAGAUUAAGAAU  
    |||| ||| |||||  
    AAAA-AAUAAUCUAAUUCUUA 5'  
AT5G14800.1    1240    1259  
pyrroline-5-carboxylate reductase

SRNA\_AG01\_SoLexa\_Mi2008\_2\_56340\_hit1  
5' UUUUAAUAGUAGAUUAAGAAU  
    |||| ||| |||||  
    AAAA-AAUAAUCUAAUUCUUA 5'  
AT5G14800.2    1244    1263  
pyrroline-5-carboxylate reductase

SRNA\_AG01\_SoLexa\_Mi2008\_1\_8021\_hit2  
5' CCGCGAGUUGAUGAGCUA-UUG  
    ||||||:||||||| |||  
    GGCGCUCGACUACUGAUGAAC 5'  
AT5G14800.2    134    155  
pyrroline-5-carboxylate reductase

SRNA\_AG01\_SoLexa\_Mi2008\_1\_50501\_hit2  
5' UUGAGACGGGCGAACGGAUGAGCU  
    ||||||| ||| |||||  
    AACUCUGCCCGCUCGACUACUGA 5'  
AT5G14800.2    138    161  
pyrroline-5-carboxylate reductase

SRNA\_AG01\_SoLexa\_Mi2008\_1\_50983\_hit4  
5' UUGAUACGGGUGAGCUGACGAGCU  
    |||| ||||:||||||| |||||  
    AACUCUGCCCGCUCGACUACUGA 5'  
AT5G14800.2    138    161  
pyrroline-5-carboxylate reductase

SRNA\_AG01\_SoLexa\_Mi2008\_3\_35861\_hit32  
5' UGAGACGGGUGAGCUGACGAG  
    |||||||:||||||| |||  
    ACUCUGCCCGCUCGACUACUC 5'  
AT5G14800.2    140    160  
pyrroline-5-carboxylate reductase

SRNA\_AG01\_SoLexa\_Mi2008\_1\_50502\_hit3  
5' UUGAGACGGGCGAACUGAUGAG  
    ||||||| ||| |||||  
    AACUCUGCCCGCUCGACUACUC 5'  
AT5G14800.2    140    161  
pyrroline-5-carboxylate reductase

SRNA\_AG01\_SoLexa\_Mi2008\_31\_50503\_hit32  
5' UUGAGACGGGUGAGCUGACGAG  
    |||||||:||||||| |||  
    AACUCUGCCCGCUCGACUACUC 5'  
AT5G14800.2    140    161  
pyrroline-5-carboxylate reductase

SRNA\_AG01\_SoLexa\_Mi2008\_1\_35500\_hit29  
5' UGACGAGCUGCUUGAGACGGGU  
    |||||||:|||||||  
    ACUCGUCGACGAACUCUGCCCG 5'  
AT5G14800.2    151    172  
pyrroline-5-carboxylate reductase

leaves\_1sup\_AG01\_SoLexa\_Mi\_Cell\_2008\_hit\_target\_site.txt

SRNA\_AG01\_SoLexa\_Mi2008\_6\_35501\_hit3

5' UGACGAGCUGCUUGAUACGGAC  
|||||  
ACUGCUCGACGAACUCUGCCCG 5'

AT5G14800.2 151 172  
pyrroline-5-carboxylate reductase

SRNA\_AG01\_SoLexa\_Mi2008\_2\_31782\_hit15

5' UCGGAGGGGAGAGCUGACGAG  
||||| ||| |||||  
AGCCUGCCACUCGACUGCUC 5'

AT5G14800.2 166 186  
pyrroline-5-carboxylate reductase

SRNA\_AG01\_SoLexa\_Mi2008\_3\_35861\_hit32

5' UGAGACGGGUGAGCUGACGAG  
| |||||  
AGCCUGCCACUCGACUGCUC 5'

AT5G14800.2 166 186  
pyrroline-5-carboxylate reductase

SRNA\_AG01\_SoLexa\_Mi2008\_7\_49399\_hit1

5' UUCGGACGGGUGAGCUGACAAG  
|||||  
AAGCCUGCCACUCGACUGCUC 5'

AT5G14800.2 166 187  
pyrroline-5-carboxylate reductase

SRNA\_AG01\_SoLexa\_Mi2008\_5\_50475\_hit1

5' UU-GAGAAGGGUGAGCUGACGAG  
|| | || |||||  
AAGC-CUGCCACUCGACUGCUC 5'

AT5G14800.2 167 188  
pyrroline-5-carboxylate reductase

SRNA\_AG01\_SoLexa\_Mi2008\_31\_50503\_hit32

5' UU-GAGACGGGUGAGCUGACGAG  
|| | |||||  
AAGC-CUGCCACUCGACUGCUC 5'

AT5G14800.2 167 188  
pyrroline-5-carboxylate reductase

SRNA\_AG01\_SoLexa\_Mi2008\_5\_50504\_hit4

5' UU-GAGACGGGUGAGCUGACGAU  
|| | |||||  
AAGC-CUGCCACUCGACUGCUC 5'

AT5G14800.2 167 188  
pyrroline-5-carboxylate reductase

SRNA\_AG01\_SoLexa\_Mi2008\_13\_12760\_hit32

5' CUU-GAGACGGGUGAGCUGACGA  
||| | |||||  
GAAGC-CUGCCACUCGACUGCU 5'

AT5G14800.2 168 189  
pyrroline-5-carboxylate reductase

SRNA\_AG01\_SoLexa\_Mi2008\_1\_41507\_hit12

5' UGGCGGGAUACUUCGGACGGG  
|||||:|||||  
ACCGCUCUAUGAAGCCUGCCC 5'

AT5G14800.2 178 198  
pyrroline-5-carboxylate reductase

leaves\_1sup\_AG01\_SoLexa\_Mi\_Cell\_2008\_hit\_target\_site.txt

SRNA\_AG01\_SoLexa\_Mi2008\_3\_11956\_hit15

5' CUGGCGGGAUACUUCGGA-GGG  
|||:|||||||  
GACCGCUCUAUGAAGCCUGCCC 5'

AT5G14800.2 179 200  
pyrroline-5-carboxylate reductase

SRNA\_AG01\_SoLexa\_Mi2008\_3\_35861\_hit32

5' UGAGACGGGUGAGCUGACGAG  
| |||||  
AGUCUGCCACUCGACUCUC 5'

AT5G14800.2 36 56  
pyrroline-5-carboxylate reductase

SRNA\_AG01\_SoLexa\_Mi2008\_31\_50503\_hit32

5' UUGAGACGGGUGAGCUGACGAG  
|| |||||  
AAGUCUGCCACUCGACUCUC 5'

AT5G14800.2 36 57  
pyrroline-5-carboxylate reductase

SRNA\_AG01\_SoLexa\_Mi2008\_13\_12760\_hit32

5' CUUGAGACGGGUGAGCUGACGA  
||| |||||  
GAAGUCUGCCACUCGACUCU 5'

AT5G14800.2 37 58  
pyrroline-5-carboxylate reductase

SRNA\_AG01\_SoLexa\_Mi2008\_1\_41507\_hit12

5' UGGCGGGAUACUUCGGACGGG  
|||:|||||||:|||||  
ACCGCUCUAUGAAGUCUGCCC 5'

AT5G14800.2 48 68  
pyrroline-5-carboxylate reductase

SRNA\_AG01\_SoLexa\_Mi2008\_1\_35500\_hit29

5' UGACGAGCUGCUUGAGACGGGU  
|||:|||||||:|||||  
ACUGCUCGACGAACUCUGCCCG 5'

AT5G14800.2 73 94  
pyrroline-5-carboxylate reductase

SRNA\_AG01\_SoLexa\_Mi2008\_6\_35501\_hit3

5' UGACGAGCUGCUUGAUACGGAC  
||| ||||| |||||  
ACUGCUCGACGAACUCUGCCCG 5'

AT5G14800.2 73 94  
pyrroline-5-carboxylate reductase

SRNA\_AG01\_SoLexa\_Mi2008\_3\_35861\_hit32

5' UGAGACGGGUGAGCUGACGAG  
| ||||| |||||  
AGUCUGCCACUAGACUCUC 5'

AT5G14800.2 88 108  
pyrroline-5-carboxylate reductase

SRNA\_AG01\_SoLexa\_Mi2008\_13\_12760\_hit32

5' CUUGAGACGGGUGAGCUGACGA  
||| ||||| |||||  
GAAGUCUGCCACUAGACUCU 5'

AT5G14800.2 89 110  
pyrroline-5-carboxylate reductase

leaves\_1sup\_AG01\_SoLexa\_Mi\_Cell\_2008\_hit\_target\_site.txt

SRNA\_AG01\_SoLexa\_Mi2008\_76\_8501\_hit1

5' CGAGACGCUUCAGACGGGUGAG  
||| |  
GCUCUACGAAGUCUGCCCACUA 5'  
AT5G14800.2 96 117

pyrroline-5-carboxylate reductase

SRNA\_AG01\_SoLexa\_Mi2008\_1\_35500\_hit29

5' UGACGAGCUGCUUGAGACGGGU  
||| |  
ACUGCUCUACGAAGUCUGCCA 5'  
AT5G14800.2 99 120

pyrroline-5-carboxylate reductase

SRNA\_AG01\_SoLexa\_Mi2008\_1\_45665\_hit1

5' UGUGUGAAGAGAGAAUGAUGG  
||| |  
ACACACUUCUCUCUUACUACC 5'  
AT5G14930.2 422 442

SAG101

SRNA\_AG01\_SoLexa\_Mi2008\_1\_45665\_hit1

5' UGUGUGAAGAGAGAAUGAUGG  
||| |  
ACACACUUCUCUCUUACUACC 5'  
AT5G14930.3 423 443

SAG101

SRNA\_AG01\_SoLexa\_Mi2008\_4\_12767\_hit1

5' CUUGAGCGUUUGG-GUCAACUA  
||| |  
GAACUCGCAAACCUC-GUUGAG 5'  
AT5G14930.2 498 518

SAG101

SRNA\_AG01\_SoLexa\_Mi2008\_4\_12767\_hit1

5' CUUGAGCGUUUGG-GUCAACUA  
||| |  
GAACUCGCAAACCUC-GUUGAG 5'  
AT5G14930.3 499 519

SAG101

SRNA\_AG01\_SoLexa\_Mi2008\_5\_29024\_hit1

5' UC-AUGGUUUCAAGAAUGCU  
|| |  
AGCUACCAAAGUUCUU-CGG 5'  
AT5G14930.2 586 604

SAG101

SRNA\_AG01\_SoLexa\_Mi2008\_5\_29024\_hit1

5' UC-AUGGUUUCAAGAAUGCU  
|| |  
AGCUACCAAAGUUCUU-CGG 5'  
AT5G14930.3 587 605

SAG101

SRNA\_AG01\_SoLexa\_Mi2008\_2\_51035\_hit1

5' UUGAUCAGAUUGGUAAGG-UGG  
||| |  
AACUAGUCUACCA-UUCCGACU 5'  
AT5G15650.1 172 192

reversibly glycosylated polypeptide-2 (AtrGP)  
Page 236

leaves\_1sup\_AG01\_SoLexa\_Mi\_Cell\_2008\_hit\_target\_site.txt

SRNA\_AG01\_SoLexa\_Mi2008\_1\_21248\_hit1  
 5' UAGAGAU CG--UCGCGUCGGUGA  
 ||||| ||||| ||||| ||||| |||||  
 AUCUCUAGCCUAGCGCAGCCACU 5'  
 AT5G15650.1 6 28  
 reversibly glycosylated polypeptide-2 (AtRGP)

SRNA\_AG01\_SoLexa\_Mi2008\_1\_56083\_hit1  
 5' UUUGUCUUGACCAAUCAUACA  
 ||||| ||||| ||||| ||||| |||||  
 AAACAGAUCUGGUCAGUAUGU 5'  
 AT5G15950.1 1014 1034  
 S-adenosylmethionine decarboxylase (adoMetDC2)

SRNA\_AG01\_SoLexa\_Mi2008\_1\_56083\_hit1  
 5' UUUGUCUUGACCAAUCAUACA  
 ||||| ||||| ||||| ||||| |||||  
 AAACAGAUCUGGUCAGUAUGU 5'  
 AT5G15950.2 1096 1116  
 S-adenosylmethionine decarboxylase (adoMetDC2)

SRNA\_AG01\_SoLexa\_Mi2008\_1\_36688\_hit1  
 5' UGAGU-AAAUGAAAAGCAAUUAG  
 | ||| ||||| ||||| ||||| |||||  
 AAUCAGUUUACGUUUUCGUUAAUC 5'  
 AT5G15950.2 1831 1853  
 S-adenosylmethionine decarboxylase (adoMetDC2)

SRNA\_AG01\_SoLexa\_Mi2008\_1\_9262\_hit1  
 5' CGGUGGGGAUGAUGGACUAA  
 ||||| ||||| ||||| ||||| |||||  
 GCCACCCCUACUA-CU-AUC 5'  
 AT5G16110.1 614 631  
 unknown protein

SRNA\_AG01\_SoLexa\_Mi2008\_1\_32339\_hit1  
 5' UCGGUU-CCUGAAUAUGGCU  
 ||||| || ||||| ||||| ||||| |||||  
 CGCCAACGG-CUUUAUACCGA 5'  
 AT5G16110.1 738 756  
 unknown protein

SRNA\_AG01\_SoLexa\_Mi2008\_1\_47599\_hit1  
 5' UUAG-CGACGAUGAUGAUGAAG  
 :||| ||||| ||||| ||||| |||||  
 GAUCUGCUGCUACUACUCCUUC 5'  
 AT5G16110.1 774 795  
 unknown protein

SRNA\_AG01\_SoLexa\_Mi2008\_19\_11133\_hit1  
 5' CUC-GGUGGUGAAGAUGCAG  
 ||| ||||| ||||| ||||| |||||  
 GAGUCCACCACUUCUACGGG 5'  
 AT5G16260.1 614 633  
 putative protein

SRNA\_AG01\_SoLexa\_Mi2008\_10\_49988\_hit1  
 5' UUGAACAAUUGAUGUUG-UGCU  
 |:||||| ||||| ||||| |||||  
 AGCUUGUUUACUACAACCACGA 5'  
 AT5G17380.1 1544 1565  
 2-hydroxyphytanoyl-CoA lyase-like protein

leaves\_1sup\_AG01\_SoLexa\_Mi\_Cell\_2008\_hit\_target\_site.txt

SRNA\_AG01\_SoLexa\_Mi2008\_3\_4962\_hit3

5' CAAGUAAUAACAUUUUAACCU  
||| |||||  
GUU-AUUUUUGUAAAU-GGU 5'  
AT5G17380.1 1681 1698  
2-hydroxyphytanoyl-CoA lyase-like protein

SRNA\_AG01\_SoLexa\_Mi2008\_1\_53538\_hit1

5' UUGUGAAUUGGUGGAGAAU  
| ||||| |||||  
AUCACUUUACCACCUCUUA 5'  
AT5G17640.1 181 199  
putative protein

SRNA\_AG01\_SoLexa\_Mi2008\_1\_39739\_hit2

5' UGGAAGAUGG-AGUGAUGCCUC  
||||| ||||| |||||  
ACCUUGUACCCUCACUACGGAC 5'  
AT5G17770.1 702 723  
NADH-cytochrome b5 reductase

SRNA\_AG01\_SoLexa\_Mi2008\_1\_25604\_hit2

5' UAUGGAAGAUGG-AGUGAUGCCU  
||||| ||||| |||||  
CUACCUUGUACCCUCACUACGGA 5'  
AT5G17770.1 703 725  
NADH-cytochrome b5 reductase

SRNA\_AG01\_SoLexa\_Mi2008\_4\_13665\_hit1

5' GACAUUUUGAAGAAUGCUUGGA  
|| ||:||||| |||||  
CU-UAGAACUUCUACG-ACCU 5'  
AT5G18000.1 220 239  
putative protein

SRNA\_AG01\_SoLexa\_Mi2008\_2\_56\_hit1

5' AAAAAAGAGGAAGAUUGGU  
|||||  
CAAUUUCUCCUUCUAACCA 5'  
AT5G18170.1 13 31  
glutamate dehydrogenase (EC 1.4.1.-) 1 (pir||S71217)

SRNA\_AG01\_SoLexa\_Mi2008\_1\_22493\_hit1

5' UAGCUCCUGAU-GGUCGAGUA  
||||| ||||| |||||  
AUCGAGGACUACCCAGAUCAG 5'  
AT5G18470.1 778 798  
unknown protein

SRNA\_AG01\_SoLexa\_Mi2008\_3\_15394\_hit1

5' GUAAUCAGAGUGAGCAUCC  
|||||:|||||  
CAUUAGUUUCACUCGUAGC 5'  
AT5G18900.1 528 546  
unknown protein

SRNA\_AG01\_SoLexa\_Mi2008\_1\_40806\_hit1

5' UGGAUAGAUAAAUAAG-AUUGAU  
||||| ||||| |||||  
ACCUAUCUAUGUAUUCUUAACAA 5'  
AT5G18900.1 592 614  
unknown protein

leaves\_1sup\_AG01\_Solexa\_Mi\_Cell\_2008\_hit\_target\_site.txt

SRNA\_AG01\_Solexa\_Mi2008\_2\_2731\_hit1  
5' AUAUGUUCUCUGUCUCUUCU  
    |||||||||  |||||||||  
    UAUACAAGA--CAGACGAAGA 5'  
AT5G19440.1    40    58  
cinnamyl-alcohol dehydrogenase - like protein

SRNA\_AG01\_Solexa\_Mi2008\_3\_17070\_hit1  
5' UAA-AUGGCCAAGUUG-AUGUU  
    |||  |||||||||||||  |  |||  
    AUUCUACCGGUUCAACCUCCAA 5'  
AT5G19690.1    1215    1236  
oligosaccharyl transferase STT3-like protein

SRNA\_AG01\_Solexa\_Mi2008\_4\_46322\_hit1  
5' UUA-AUGGCCAAGUUG-AUGUU  
    ||||  |||||||||||||  |  |||  
    AAUUCUACCGGUUCAACCUCCAA 5'  
AT5G19690.1    1215    1237  
oligosaccharyl transferase STT3-like protein

SRNA\_AG01\_Solexa\_Mi2008\_1\_40533\_hit1  
5' UGGAGGAUGAGAUUGCAGUGCA  
    |||||  ||||  |||||||||  
    ACCUC-UACUGUAACGUCACGG 5'  
AT5G19690.1    1979    1999  
oligosaccharyl transferase STT3-like protein

SRNA\_AG01\_Solexa\_Mi2008\_1\_17767\_hit1  
5' UAAGAAGUGAUUACUGGAU  
    |||||  |||||||||||||  
    AUUCU-CACUUAUUGACCUA 5'  
AT5G19740.1    1519    1537  
peptidase-like protein

SRNA\_AG01\_Solexa\_Mi2008\_4\_13579\_hit2  
5' GACAAAGUGAAGGGUU-UGGU  
    |||||||||||||  ||  ||||  
    CUGUUUCACUCC-AAGACCA 5'  
AT5G20020.1    614    633  
small Ras-like GTP-binding protein

SRNA\_AG01\_Solexa\_Mi2008\_1\_8382\_hit2  
5' CGACAAAGUGAAGGGUU-UGGU  
    |||||||||||||  ||  ||||  
    CCUGUUUCACUCC-AAGACCA 5'  
AT5G20020.1    614    634  
small Ras-like GTP-binding protein

SRNA\_AG01\_Solexa\_Mi2008\_1\_13578\_hit2  
5' GACAAAGUGAAGGGUU-UGG  
    |||||||||||||  ||  |||  
    CUGUUUCACUCC-AAGACC 5'  
AT5G20020.1    615    633  
small Ras-like GTP-binding protein

SRNA\_AG01\_Solexa\_Mi2008\_1\_4723\_hit2  
5' CAAGCAUUUGUGGUCCAGUGGU  
    |||  |||  |||||||||  
    AUUCAUAA-CACCAGGUCACCA 5'  
AT5G20230.1    415    435  
blue copper binding protein (bc)

leaves\_1sup\_AG01\_SoLexa\_Mi\_Cell\_2008\_hit\_target\_site.txt

SRNA\_AG01\_SoLexa\_Mi2008\_73\_36978\_hit1  
5' UGAUAGGUGUUGUGGUCUCCC  
||| |||||  
ACU-UCCACAACACCAG-GGU 5'  
AT5G20230.1 591 609  
blue copper binding protein (bcb)

SRNA\_AG01\_SoLexa\_Mi2008\_9\_11566\_hit1  
5' CUGAUAGGUGUUGUGGUCUCCC  
|||| |||||  
GACU-UCCACAACACCAG-GGU 5'  
AT5G20230.1 591 610  
blue copper binding protein (bcb)

SRNA\_AG01\_SoLexa\_Mi2008\_32\_11564\_hit1  
5' CUGAUAGGUGUUGUGGUCUC  
|||| |||||  
GACU-UCCACAACACCAGGG 5'  
AT5G20230.1 592 610  
blue copper binding protein (bcb)

SRNA\_AG01\_SoLexa\_Mi2008\_62\_11565\_hit1  
5' CUGAUAGGUGUUGUGGUCUCC  
|||| |||||  
GACU-UCCACAACACCAG-GG 5'  
AT5G20230.1 592 610  
blue copper binding protein (bcb)

SRNA\_AG01\_SoLexa\_Mi2008\_3\_39344\_hit1  
5' UGCUGAUAGGUGUUGUGGUC  
:|||| |||||  
GCGACU-UCCACAACACCAG 5'  
AT5G20230.1 594 612  
blue copper binding protein (bcb)

SRNA\_AG01\_SoLexa\_Mi2008\_1\_14342\_hit1  
5' GAUGGUUUUGAUUAAUGCU  
||| |||||  
AUAC-AAAACUAAUUA-GA 5'  
AT5G20240.1 7 23  
PI protein (PISTILLATA)

SRNA\_AG01\_SoLexa\_Mi2008\_11\_6237\_hit1  
5' CAGCAACACCAGAAGACGAG  
|||||  
UUCGUUGUGGUCUUCU-CUC 5'  
AT5G20320.1 1531 1549  
CAF-like protein

SRNA\_AG01\_SoLexa\_Mi2008\_6\_7327\_hit1  
5' CAUGGUGUUGAAAAAGGU-UCC  
||||| |||||  
GUACCACAUCUUUUUCCACAGC 5'  
AT5G20320.1 3601 3622  
CAF-like protein

SRNA\_AG01\_SoLexa\_Mi2008\_4\_53237\_hit1  
5' UUGGUUUCAGUUUCGGGAUA-AC  
||||| |||||  
CACCAAAGUCAAGCCCU-UCUG 5'  
AT5G20320.1 4240 4261  
CAF-like protein

leaves\_1sup\_AG01\_SoLexa\_Mi\_Cell\_2008\_hit\_target\_site.txt

SRNA\_AG01\_SoLexa\_Mi2008\_2\_43380\_hit1

5' UGGAGAUGAUUGUGU-GUUGC  
 ||||:||||||| |||||  
 ACCAUUACUAACACAACAACG 5'  
 AT5G21105.1 639 659

SRNA\_AG01\_SoLexa\_Mi2008\_1\_40185\_hit1

5' UGGAGAAGACGCUAAUGGUGG  
 ||||| |||| ||:  
 ACCUCUUCUGCG-UUAC-ACU 5'  
 AT5G21160.1 110 128  
 unknown protein

SRNA\_AG01\_SoLexa\_Mi2008\_2\_830\_hit1

5' AAGAUGGAGAAGAUACGCAA  
 ||||| |||||  
 CUCUACCUCUUC--UGCGUU 5'  
 AT5G21160.1 115 132  
 unknown protein

SRNA\_AG01\_SoLexa\_Mi2008\_1\_47294\_hit1

5' UUAGAAGGCAUCAGAUGGAGA  
 || ||||| ||||| |||||  
 AA-CUUCC-UAGUCUACCUCU 5'  
 AT5G21160.1 123 141  
 unknown protein

SRNA\_AG01\_SoLexa\_Mi2008\_1\_4285\_hit1

5' CAAAUUCAGAGUGAC-GCUU  
 ||||| |||||  
 AUUUAAAGUCUCACUAACGAA 5'  
 AT5G21160.1 2814 2833  
 unknown protein

SRNA\_AG01\_SoLexa\_Mi2008\_1\_45719\_hit1

5' UGUGUGUGUGUGU-UGGUGUGU  
 ||||| |||||  
 ACACACACACACAUUA-CACAAA 5'  
 AT5G22570.1 42 62  
 WRKY transcription factor 38 (WRKY38)

SRNA\_AG01\_SoLexa\_Mi2008\_26\_5155\_hit1

5' CA-AUGGAGCUCUGAAAUGGUU  
 || ||:||||||| |||||  
 GUCUAUCUCGAGACUUUAC-AA 5'  
 AT5G22690.1 2274 2294  
 disease resistance protein-like

SRNA\_AG01\_SoLexa\_Mi2008\_1\_45919\_hit1

5' UGUUCUCUCGUGUGG-UUUGGU  
 ||||| |||||  
 CAAAGAGAGCACACCCAAACCA 5'  
 AT5G22940.1 138 159  
 unknown protein

SRNA\_AG01\_SoLexa\_Mi2008\_1\_174\_hit2

5' AA-AAGAAGAAGAUAAAGCAUUA  
 || ||||| ||||| |||||  
 UUCUUCUUCUUCUAAUUC-UACA 5'  
 AT5G22940.1 366 387  
 unknown protein

leaves\_1sup\_AG01\_SoIexa\_Mi\_Cell\_2008\_hit\_target\_site.txt

SRNA\_AG01\_SoIexa\_Mi2008\_7\_353\_hit2

5' AAAGAAGAAGAUAAAGCAU  
|||  
GUUCUUCUUCUAAUUUC-UA 5'  
AT5G22940.1 368 385  
unknown protein

SRNA\_AG01\_SoIexa\_Mi2008\_1\_172\_hit2

5' AA-AAGAAGAAGAUAAAGCA  
|||  
UUCUUCUUCUUCUAAUUUCUA 5'  
AT5G22940.1 368 387  
unknown protein

SRNA\_AG01\_SoIexa\_Mi2008\_1\_173\_hit2

5' AA-AAGAAGAAGAUAAAGCAU  
|||  
UUCUUCUUCUUCUAAUUUC-UA 5'  
AT5G22940.1 368 387  
unknown protein

SRNA\_AG01\_SoIexa\_Mi2008\_1\_30783\_hit1

5' UCGAGGGAGAAGCUA-GAUGUG  
|||  
AGCUGCCUCUUC-AUUCUACAC 5'  
AT5G22940.1 439 459  
unknown protein

SRNA\_AG01\_SoIexa\_Mi2008\_2\_255\_hit1

5' AAA-AUAGUGUGGGAA-UGUUA  
|||  
UUUCUAUCACACCCUUAACAAA 5'  
AT5G23010.1 5 26  
2-isopropylmalate synthase-like; homocitrate synthase-like

SRNA\_AG01\_SoIexa\_Mi2008\_9\_13465\_hit1

5' GAAGAUGG-GUGGGAAUUGUUU  
|||:|  
AUUCUAUCACACCCUUAACAAA 5'  
AT5G23010.1 5 26  
2-isopropylmalate synthase-like; homocitrate synthase-like

SRNA\_AG01\_SoIexa\_Mi2008\_2\_4771\_hit1

5' CAAGCUCUUCAGGUA-UUUCU  
|||  
GUUCGAGAUGUCCAUAAAAGA 5'  
AT5G23405.1 175 195

SRNA\_AG01\_SoIexa\_Mi2008\_2\_4771\_hit1

5' CAAGCUCUUCAGGUUUU-CU  
|||  
GUUCGAGAUGUCCAUAAAAGA 5'  
AT5G23405.2 182 202

SRNA\_AG01\_SoIexa\_Mi2008\_1\_3079\_hit472

5' AUGAUGAUGAUGAUGAUGAUGA  
|||  
UACUACUACUACUAAUAGUACC 5'  
AT5G24030.1 629 650  
unknown protein

SRNA\_AG01\_SoIexa\_Mi2008\_9\_14254\_hit8

5' GAUGAUGAUGAUGAUGAUCUU

leaves\_1sup\_AG01\_SoLexa\_Mi\_Cell\_2008\_hit\_target\_site.txt

|||||  
CUACUACUACUACUAAUAGUA 5'  
AT5G24030.1 631 651  
unknown protein

SRNA\_AG01\_SoLexa\_Mi2008\_1\_36323\_hit13  
5' UGAGGAUGAUGAUGAUGAUGA  
|||:|||||  
ACUUCUACUACUACUACUAAU 5'  
AT5G24030.1 635 655  
unknown protein

SRNA\_AG01\_SoLexa\_Mi2008\_1\_3079\_hit472  
5' AUGAUGAUGAUGAUGAUGAUGA  
|||||  
UACUUCUACUACUACUACUAAU 5'  
AT5G24030.1 635 656  
unknown protein

SRNA\_AG01\_SoLexa\_Mi2008\_1\_37834\_hit1  
5' UGCAAUUAUAGAUGAUGAUGAUU  
|| || || ||  
AC-UUCUA-CUACUACUACUAA 5'  
AT5G24030.1 637 656  
unknown protein

SRNA\_AG01\_SoLexa\_Mi2008\_1\_3079\_hit472  
5' AUGAUGAUGAUGAUGAUGAUGA  
:|||||  
AGCUACUUCUACUACUACUACU 5'  
AT5G24030.1 638 659  
unknown protein

SRNA\_AG01\_SoLexa\_Mi2008\_1\_45039\_hit3  
5' UGU-GAUGAUGAUGAUGAUGAUGA  
||| |||||  
ACAGCUACUUCUACUACUACUACU 5'  
AT5G24030.1 639 662  
unknown protein

SRNA\_AG01\_SoLexa\_Mi2008\_12\_14346\_hit675  
5' GAUGUCAUGUGUAUG-A-UUGA  
|||||  
CUACAGUACACAGACUUAACU 5'  
AT5G24040.1 122 143  
putative protein

SRNA\_AG01\_SoLexa\_Mi2008\_1\_38851\_hit1  
5' UGCGAUUGAGAGCAACAAGA  
|||||  
ACGCUAACUCUCGUAGUUUC 5'  
AT5G24160.1 1594 1613  
squalene monooxygenase 1,2 (squalene epoxidase 1,2) (se 1,2) (sp|065402)

SRNA\_AG01\_SoLexa\_Mi2008\_4\_15252\_hit1  
5' GGGUACCAGAGGAAAUUAGUA  
:|||||  
UCCAUGGACUCCUUGAUUAUCAU 5'  
AT5G24160.1 905 926  
squalene monooxygenase 1,2 (squalene epoxidase 1,2) (se 1,2) (sp|065402)

SRNA\_AG01\_SoLexa\_Mi2008\_1\_19693\_hit1  
5' UACCAAUGACGCUCGGUGGUAC

leaves\_1sup\_AG01\_SoLexa\_Mi\_Cell\_2008\_hit\_target\_site.txt

|||||  
AUGGUUACUGCGAGCCACCAUG 5'  
AT5G24200.1 259 280  
putative protein

SRNA\_AG01\_SoLexa\_Mi2008\_2\_18780\_hit1  
5' UAAUGCGUCCUAAGUUGUUGGU  
|||||  
AUUACGCAGGGAUUCAACAACCA 5'  
AT5G24200.1 390 412  
putative protein

SRNA\_AG01\_SoLexa\_Mi2008\_1\_40595\_hit1  
5' UGGAGGUACUAUCGAGUUGGGAGU  
|||||  
ACCUCCAUGAUAGCUCAACCCUCA 5'  
AT5G24200.1 464 487  
putative protein

SRNA\_AG01\_SoLexa\_Mi2008\_1\_40594\_hit1  
5' UGGAGGUACUAUCGAGUUGGGGA  
|||||  
ACCUCCAUGAUAGCUCAACCCU 5'  
AT5G24200.1 466 487  
putative protein

SRNA\_AG01\_SoLexa\_Mi2008\_1\_17535\_hit1  
5' UAACGUGGAGGUACUAUCGAGU  
|||||  
AUUGCACCUCCAUGAUAGCUCA 5'  
AT5G24200.1 471 492  
putative protein

SRNA\_AG01\_SoLexa\_Mi2008\_2\_42234\_hit1  
5' UGGGCUUAAGAUCGUUCCACGU  
|||||  
ACCCGAAUUCUAGCAAGGUGCA 5'  
AT5G24200.1 505 526  
putative protein

SRNA\_AG01\_SoLexa\_Mi2008\_1\_2672\_hit1  
5' AUAGUUUGUGGGCUUAAGAUC  
|||||  
UAUCAAACACCCGAAUUCUAG 5'  
AT5G24200.1 514 534  
putative protein

SRNA\_AG01\_SoLexa\_Mi2008\_9\_26051\_hit1  
5' UAUGUGGCCACAAAUAUUGCA  
|||||  
AUACACCGGUGUUUUAUACGU 5'  
AT5G24200.1 618 639  
putative protein

SRNA\_AG01\_SoLexa\_Mi2008\_1\_41017\_hit1  
5' UGGAUUGAAGAUGUAAGCCUCGAC  
|||||  
ACCUAACUUCUACAUUCGGAGCUG 5'  
AT5G24200.1 731 754  
putative protein

SRNA\_AG01\_SoLexa\_Mi2008\_3\_24953\_hit3  
5' UAUCCA-UUCUAUAUACUAUGU

leaves\_1sup\_AG01\_SoLexa\_Mi\_Cell\_2008\_hit\_target\_site.txt

|||| | || |||||  
AUAG-UGAACAUUAUGAUACA 5'  
AT5G24420.1 1178 1198  
6-phosphogluconolactonase-like protein

SRNA\_AG01\_SoLexa\_Mi2008\_41\_6691\_hit3  
5' CAGUCAUAGAUAGUCUCUGCAA  
|||| |  
CUCAGAAUCUAUCAGAGAGGUU 5'  
AT5G24530.1 496 517  
flavanone 3-hydroxylase-like protein

SRNA\_AG01\_SoLexa\_Mi2008\_4\_48531\_hit1  
5' UUCAAGGUGAUUUCUAGACAAUGU  
|||| |  
AAGUCCACUAUAGAU-U-UUACU 5'  
AT5G24590.2 135 156  
NAC2-like protein

SRNA\_AG01\_SoLexa\_Mi2008\_1\_36065\_hit1  
5' UGAGCAUCCACAGUUGGUCCU  
|||| |  
ACUCGUAGGUGUCAACCAGGA 5'  
AT5G24810.1 1665 1685  
unknown protein

SRNA\_AG01\_SoLexa\_Mi2008\_1\_34056\_hit1  
5' UGAAAAACGGAUGAGUGAUUUUAAAG  
|||| |  
ACUUUUUGCCUACUCACUAAAUUC 5'  
AT5G25110.1 145 168  
serine/threonine protein kinase-like protein

SRNA\_AG01\_SoLexa\_Mi2008\_1\_23143\_hit1  
5' UAGGGGCCGAUUGAUAGCGACUGU  
|||| |  
AUCCCCGGCUAACCAUUGCUGACA 5'  
AT5G25110.1 174 197  
serine/threonine protein kinase-like protein

SRNA\_AG01\_SoLexa\_Mi2008\_1\_23146\_hit1  
5' UAGGGGCUGAUUGGUAGCGAGUGU  
|||| |:|||| |:|||  
AUCCCCGGCUAACCAUUGCUGACA 5'  
AT5G25110.1 174 197  
serine/threonine protein kinase-like protein

SRNA\_AG01\_SoLexa\_Mi2008\_17\_8110\_hit2  
5' CCGUGGGUU-GUUUUUAUAAGAA  
|||| |  
AGCACCAAUAUCAAUAUUCUU 5'  
AT5G25110.1 17 38  
serine/threonine protein kinase-like protein

SRNA\_AG01\_SoLexa\_Mi2008\_1\_4569\_hit2  
5' CAAGAAGAAGGUUGG-UUAGUU  
|||| |  
GUUCUUCUUC-ACCAAUCAA 5'  
AT5G25110.1 26 46  
serine/threonine protein kinase-like protein

SRNA\_AG01\_SoLexa\_Mi2008\_5\_21867\_hit1  
5' UAGAUGGGUGUAAAAUGUAAC

leaves\_1sup\_AG01\_SoLexa\_Mi\_Cell\_2008\_hit\_target\_site.txt

|||||:|||||||  
CUCUACUCACAUUUUACAUUA 5'  
AT5G25460.1 28 48  
Unknown protein

SRNA\_AG01\_SoLexa\_Mi2008\_1\_2\_hit38  
5' AAAA-AAAAAAAAAACCAU  
|||| |  
UUUUUUUUUUUUUUUUU-GUA 5'  
AT5G25610.1 1436 1454  
dehydration-induced protein RD22

SRNA\_AG01\_SoLexa\_Mi2008\_4\_43921\_hit1  
5' UGUAAA-GGGUGUUAGUAGAAAG  
|||| |  
ACAUUUUCCCAAUAUCUUUC 5'  
AT5G25610.1 22 44  
dehydration-induced protein RD22

SRNA\_AG01\_SoLexa\_Mi2008\_1\_50782\_hit1  
5' UUGAGG-GUUGGAAUAGACAUGG  
||| |  
AAC-CCUCAACCUUAUCUUUACC 5'  
AT5G25610.1 93 114  
dehydration-induced protein RD22

SRNA\_AG01\_SoLexa\_Mi2008\_8\_50781\_hit1  
5' UUGAGG-GUUGGAAUAGACAUG  
||| |  
AAC-CCUCAACCUUAUCUUUAC 5'  
AT5G25610.1 94 114  
dehydration-induced protein RD22

SRNA\_AG01\_SoLexa\_Mi2008\_1\_1627\_hit6  
5' ACGGAAUAGCGAGUUGGUC  
|||||||  
UGCCUUUUCGCUCA-C-AG 5'  
AT5G25770.2 1034 1050  
unknown protein

SRNA\_AG01\_SoLexa\_Mi2008\_1\_1627\_hit6  
5' ACGGAAUAGCGAGUUGGUC  
|||||||  
UGCCUUUUCGCUCA-A-CAG 5'  
AT5G25770.3 1043 1059  
unknown protein

SRNA\_AG01\_SoLexa\_Mi2008\_1\_1627\_hit6  
5' ACGGAAUAGCGAGUUGGUC  
|||||||  
UGCCUUUUCGCUCA-C-AG 5'  
AT5G25770.1 1277 1293  
unknown protein

SRNA\_AG01\_SoLexa\_Mi2008\_1\_33976\_hit1  
5' UCUUGGUGGACAUG-AGUGGAC  
|||||||: |||||  
AGAACCACCUGUAUAUCACCUA 5'  
AT5G26000.2 1672 1693  
myrosinase precursor

SRNA\_AG01\_SoLexa\_Mi2008\_1\_16880\_hit3  
5' UAAAGGUC-U-AUCUAUGGAGCA

leaves\_1sup\_AG01\_SoLexa\_Mi\_Cell\_2008\_hit\_target\_site.txt

```
||||| || | |||||
AUUUCGAGGAAUAGAUACCUCGU 5'
AT5G26000.2      1720      1742
myrosinase precursor
```

```
SRNA_AG01_SoLexa_Mi2008_1_23310_hit418
5' UAGGG-UUUA-GGGUUUAGGGUUU
   ||:| | | | | | | | | | | | | | |
AUUCCUAAAUAACCCAAAUCCCAAA 5'
AT5G26030.2      119      142
ferrochelatase-I
```

```
SRNA_AG01_SoLexa_Mi2008_13_27378_hit1
5' UCAAUAGAUUGGACUAUGUUAU
   ||||| | | | | | | | | | | | | | | |
AGUUAUCUAACCUGAUUAUAUA 5'
AT5G26030.1      1674      1694
ferrochelatase-I
```

```
SRNA_AG01_SoLexa_Mi2008_2_27377_hit1
5' UCAAUAGAUUGGACUAUGUA
   ||||| | | | | | | | | | | | | | | |
AGUUAUCUAACCUGAUUAUAUA 5'
AT5G26030.1      1675      1694
ferrochelatase-I
```

```
SRNA_AG01_SoLexa_Mi2008_2_55069_hit1
5' UUUGAAGA-UUUCAGGACCACC
   :| | | | | | | | | | | | | | | | |
GAA-UUCUCAAGUCCUGGUGG 5'
AT5G26030.2      507      527
ferrochelatase-I
```

```
SRNA_AG01_SoLexa_Mi2008_9_6886_hit1
5' CAUAGAGU-UGGUUUUGGGUCU
   |||| | | | | | | | | | | | | | | |
CUAUCCAGACCAAAACCCAGA 5'
AT5G26690.1      336      357
unknown protein
```

```
SRNA_AG01_SoLexa_Mi2008_22_7409_hit1
5' CA-UGUUGACCAAUUCAAGA
   || | | | | | | | | | | | | | | | |
GUGACAACUGGUUAAAUAUCU 5'
AT5G26770.2      110      129
unknown protein
```

```
SRNA_AG01_SoLexa_Mi2008_2_131_hit1
5' AAAA-AUAUAGUUCAGGGUU
   || | | | | | | | | | | | | | | | |
GUUUGUAUCUCAAGUCCCAA 5'
AT5G26770.3      128      147
unknown protein
```

```
SRNA_AG01_SoLexa_Mi2008_2_131_hit1
5' AAAA-AUAUAGUUCAGGGUU
   || | | | | | | | | | | | | | | | |
GUUUGUAUCUCAAGUCCCAA 5'
AT5G26770.2      29      48
unknown protein
```

```
SRNA_AG01_SoLexa_Mi2008_1_6075_hit1
5' CAGAGGCGAAGUGA-AAA-UGCU
```

leaves\_1sup\_AG01\_SoLexa\_Mi\_Cell\_2008\_hit\_target\_site.txt

```

|||||
GUCUCCGCUUCACUCUUUGACCA 5'
AT5G26850.1      43      65
unknown protein

```

```

SRNA_AG01_SoLexa_Mi2008_2_20904_hit1
5' UAGA-A-GAUGAUUGAUUGUU
   |||| | |||||:||||
   AUCUCUACUACUAACUAGCAA 5'
AT5G27600.1      110     130
long chain acyl-CoA synthetase 7 (LACS7)

```

```

SRNA_AG01_SoLexa_Mi2008_1_3_hit25
5' AAA-A-AAAAAAAAAGAAAGA
   ||| | |||||
   UUUUAUGUUUUUUUUUCUUUGU 5'
AT5G27600.1      2166    2186
long chain acyl-CoA synthetase 7 (LACS7)

```

```

SRNA_AG01_SoLexa_Mi2008_8_53727_hit2
5' UUGUUAAAGAAGAUGGAG-AAA
   ||||| ||||| ||| |||
   AACAACUUCUUCUA-CUCGUUU 5'
AT5G27760.1      34      54
unknown protein

```

```

SRNA_AG01_SoLexa_Mi2008_3_13907_hit1
5' GAGAAGAGAUAGA-AUAGAAU
   ||||| ||||| || |||
   CUCUUCUCUAUCUCUACCUUU 5'
AT5G33290.1      326     346
unknown protein

```

```

SRNA_AG01_SoLexa_Mi2008_13_13906_hit2
5' GAGAAGAGAUAGA-AUAGAA
   ||||| ||||| || |||
   CUCUUCUCUAUCUCUACCUU 5'
AT5G33290.1      327     346
unknown protein

```

```

SRNA_AG01_SoLexa_Mi2008_4_35785_hit2
5' UGAGAAGAGAUAGA-AUAGAA
   :|||
   GCUCUUCUCUAUCUCUACCUU 5'
AT5G33290.1      327     347
unknown protein

```

```

SRNA_AG01_SoLexa_Mi2008_40_50469_hit1
5' UUGAGAAGAGAUAGA-AUAGAA
   |:|||||
   AGCUCUUCUCUAUCUCUACCUU 5'
AT5G33290.1      327     348
unknown protein

```

```

SRNA_AG01_SoLexa_Mi2008_1_2422_hit4
5' AUAAUAUUCAGUAACUCGGU
   ||||| ||||| ||
   UAUUAUAAGUCU-UUGA-CCU 5'
AT5G33370.2      459     477
unknown protein

```

```

SRNA_AG01_SoLexa_Mi2008_1_23511_hit1
5' UAGGUG-UGAUGAUUGGUUGUA

```

leaves\_1sup\_AG01\_SoLexa\_Mi\_Cell\_2008\_hit\_target\_site.txt

```

:||||| |||||:||||
GUCCACCACUACUAACCAGCAU 5'
AT5G35090.1      200      221
unknown protein

```

```

SRNA_AG01_SoLexa_Mi2008_1_43578_hit1
5' UGGUGGUGGUGAUGA-UGUGUC
   |||||
   UCCACCACCACUACUAAC-CAG 5'
AT5G35090.1      203      223
unknown protein

```

```

SRNA_AG01_SoLexa_Mi2008_7_20716_hit3
5' UAC-UUUAGAGUGGACUUCU
   ||| |||||
   AUGCAAUCUCACCUAAAGA 5'
AT5G35180.3     1332     1351
unknown protein

```

```

SRNA_AG01_SoLexa_Mi2008_2_7736_hit1
5' CCAGAAAAGAAGAAACAAU
   |||||
   AAUCUUUCUUCUUU-UUA 5'
AT5G35180.1     2561     2578
unknown protein

```

```

SRNA_AG01_SoLexa_Mi2008_2_7736_hit1
5' CCAGAAAAGAAGAAACAAU
   |||||
   AAUCUUUCUUCUUU-UUA 5'
AT5G35180.2     2649     2666
unknown protein

```

```

SRNA_AG01_SoLexa_Mi2008_2_40489_hit1
5' UGGAGGACAAGCUAGUGAUCGU
   ||||| ||:|||||
   ACCUCCUGUUCGUUUACUAGCU 5'
AT5G36220.1      847      868
cytochrome P450 monooxygenase (CYP81D1 )

```

```

SRNA_AG01_SoLexa_Mi2008_4_16065_hit2
5' GUGUU-GAGACAUGAGAAGU
   :|||| |||||:|
   UACAAACUCUGUACUCUUUA 5'
AT5G36890.2     1103     1122
beta-glucosidase -like protein

```

```

SRNA_AG01_SoLexa_Mi2008_4_16065_hit2
5' GUGUU-GAGACAUGAGAAGU
   :|||| |||||:|
   UACAAACUCUGUACUCUUUA 5'
AT5G36890.1     1104     1123
beta-glucosidase -like protein

```

```

SRNA_AG01_SoLexa_Mi2008_1_27137_hit1
5' UCAAGCAUAUCACUGAGUAGU
   ||||| ||:||||
   AGUUCGUUAGU-ACUUAUCU 5'
AT5G36890.2     1337     1356
beta-glucosidase -like protein

```

```

SRNA_AG01_SoLexa_Mi2008_1_27137_hit1
5' UCAAGCAUAUCACUGAGUAGU

```

leaves\_1sup\_AG01\_SoLexa\_Mi\_Cell\_2008\_hit\_target\_site.txt

|||||:||||  
 AGUUCGUUAGU-ACUUAUCU 5'  
 AT5G36890.1 1338 1357  
 beta-glucosidase -like protein

SRNA\_AG01\_SoLexa\_Mi2008\_1\_11678\_hit1  
 5' CUGCAACUGUUGAAGAU--CCA  
 |||||:||||  
 GACGGUGACAACUUCUACCGGU 5'  
 AT5G37020.2 1749 1770  
 auxin response factor 8 (ARF8)

SRNA\_AG01\_SoLexa\_Mi2008\_1\_38941\_hit1  
 5' UGCGGAUUUCCGGGUUCUAGAG  
 |||||:||||  
 ACGCCUAAAGGCCCAAGAUCUC 5'  
 AT5G37020.2 2005 2026  
 auxin response factor 8 (ARF8)

SRNA\_AG01\_SoLexa\_Mi2008\_1\_34515\_hit1  
 5' UGAAGAAGCAAUG-GGGUA  
 |||||:||||  
 ACUUCUUCGUUU-CGCCCU 5'  
 AT5G37020.2 2085 2103  
 auxin response factor 8 (ARF8)

SRNA\_AG01\_SoLexa\_Mi2008\_4\_2102\_hit1  
 5' AGCUGCCAGCAUGAUCUAU  
 |||||:||||  
 UCGACGGUCGGACUAGAUU 5'  
 AT5G37020.2 2368 2386  
 auxin response factor 8 (ARF8)

SRNA\_AG01\_SoLexa\_Mi2008\_4\_13484\_hit1  
 5' GAAGCUGCCAGCAUGAUCUAU  
 |||||:||||  
 GUUCGACGGUCGGACUAGAUU 5'  
 AT5G37020.2 2368 2388  
 auxin response factor 8 (ARF8)

SRNA\_AG01\_SoLexa\_Mi2008\_61\_34692\_hit1  
 5' UGAAGCUGCCAGCAUGAUCUAA  
 |||||:||||  
 UGUUCGACGGUCGGACUAGAUU 5'  
 AT5G37020.2 2368 2389  
 auxin response factor 8 (ARF8)

SRNA\_AG01\_SoLexa\_Mi2008\_13\_873\_hit2  
 5' AAGCUGCCAGCAUGAUCUA  
 |||||:||||  
 UUCGACGGUCGGACUAGAU 5'  
 AT5G37020.2 2369 2387  
 auxin response factor 8 (ARF8)

SRNA\_AG01\_SoLexa\_Mi2008\_1\_874\_hit1  
 5' AAGCUGCCAGCAUGAUCUG  
 |||||:||||  
 UUCGACGGUCGGACUAGAU 5'  
 AT5G37020.2 2369 2387  
 auxin response factor 8 (ARF8)

SRNA\_AG01\_SoLexa\_Mi2008\_1\_4776\_hit1  
 5' CAAGCUGCCAGCCUGAUCUA

leaves\_1sup\_AG01\_SoLexa\_Mi\_Cell\_2008\_hit\_target\_site.txt

|||||  
GUUCGACGGUCGGACUAGAU 5'  
AT5G37020.2 2369 2388  
auxin response factor 8 (ARF8)

SRNA\_AG01\_SoLexa\_Mi2008\_1519\_13483\_hit2  
5' GAAGCUGCCAGCAUGAUCUA  
|||||  
GUUCGACGGUCGGACUAGAU 5'  
AT5G37020.2 2369 2388  
auxin response factor 8 (ARF8)

SRNA\_AG01\_SoLexa\_Mi2008\_3\_13485\_hit1  
5' GAAGCUGCCAGCAUGAUCUG  
|||||:  
GUUCGACGGUCGGACUAGAU 5'  
AT5G37020.2 2369 2388  
auxin response factor 8 (ARF8)

SRNA\_AG01\_SoLexa\_Mi2008\_344873\_34691\_hit2  
5' UGAAGCUGCCAGCAUGAUCUA  
|||||  
UGUUCGACGGUCGGACUAGAU 5'  
AT5G37020.2 2369 2389  
auxin response factor 8 (ARF8)

SRNA\_AG01\_SoLexa\_Mi2008\_54\_13482\_hit3  
5' GAAGCUGCCAGCAUGAUCU  
|||||  
GUUCGACGGUCGGACUAGA 5'  
AT5G37020.2 2370 2388  
auxin response factor 8 (ARF8)

SRNA\_AG01\_SoLexa\_Mi2008\_7845\_34690\_hit3  
5' UGAAGCUGCCAGCAUGAUCU  
|||||  
UGUUCGACGGUCGGACUAGA 5'  
AT5G37020.2 2370 2389  
auxin response factor 8 (ARF8)

SRNA\_AG01\_SoLexa\_Mi2008\_17\_46569\_hit1  
5' UUAAGCUGCCAGCAUGAUCU  
:|||||  
UGUUCGACGGUCGGACUAGA 5'  
AT5G37020.2 2370 2389  
auxin response factor 8 (ARF8)

SRNA\_AG01\_SoLexa\_Mi2008\_6340\_34689\_hit3  
5' UGAAGCUGCCAGCAUGAUC  
|||||  
UGUUCGACGGUCGGACUAG 5'  
AT5G37020.2 2371 2389  
auxin response factor 8 (ARF8)

SRNA\_AG01\_SoLexa\_Mi2008\_8\_46568\_hit1  
5' UUAAGCUGCCAGCAUGAUC  
:|||||  
UGUUCGACGGUCGGACUAG 5'  
AT5G37020.2 2371 2389  
auxin response factor 8 (ARF8)

SRNA\_AG01\_SoLexa\_Mi2008\_1\_47627\_hit1  
5' UUAGCUAGCAGAAGCAUGUGCA

leaves\_1sup\_AG01\_SoLexa\_Mi\_Cell\_2008\_hit\_target\_site.txt

|||| | |||||  
AAUCAA-CGUCUUCGUACACGU 5'  
AT5G37020.2 879 899  
auxin response factor 8 (ARF8)

SRNA\_AG01\_SoLexa\_Mi2008\_1\_51898\_hit5  
5' UUGC UUUCUUGAUGGAUACUCA  
|||||:|||||  
AACGAAAGAACUAC-UA-GAGC 5'  
AT5G37600.1 974 993  
glutamate--ammonia ligase

SRNA\_AG01\_SoLexa\_Mi2008\_1\_7253\_hit1  
5' CAUGGAUGGUCUGAUGGAUCGG  
|||||:|||||  
GUACCUGCCAGACUACCU-GCC 5'  
AT5G38250.1 1575 1595  
receptor serine/threonine protein kinase - like

SRNA\_AG01\_SoLexa\_Mi2008\_2\_14498\_hit1  
5' GCCAAAGAAAUGG--ACGAGG  
|||||:|||||  
CGGUUUUUUACCGCUGCUCC 5'  
AT5G38250.1 421 441  
receptor serine/threonine protein kinase - like

SRNA\_AG01\_SoLexa\_Mi2008\_1\_31483\_hit3  
5' UCGCCGGUU-CGAGUGACGUU  
|||||:|||||  
AGCGCCAAGGC-CACUGCCA 5'  
AT5G38880.1 98 117  
putative protein

SRNA\_AG01\_SoLexa\_Mi2008\_1\_13420\_hit2  
5' GAAGAAGAAGAAGACU-CUU  
|||||:|||||  
CUUCUUCUUCUUCACGAA 5'  
AT5G38900.1 895 914  
frnE protein - like

SRNA\_AG01\_SoLexa\_Mi2008\_13\_4545\_hit1  
5' CAAGAAAGAUGGUUGUCGUU  
|||||:|||||  
ACUCUUUCAACCAACAGCAA 5'  
AT5G39050.1 534 553  
Anthocyanin acyltransferase - like protein

SRNA\_AG01\_SoLexa\_Mi2008\_1\_13420\_hit2  
5' GAAGAAGAAGAAGACUCUU  
|| |||||:|||||  
CUCCUUCUUCUUCUGAGAA 5'  
AT5G39050.1 830 848  
Anthocyanin acyltransferase - like protein

SRNA\_AG01\_SoLexa\_Mi2008\_1\_4090\_hit1  
5' CA-AAGAGUAGACAAUCAUCAA  
|| |||||:|||||  
GUAUUCUCAUUUGUUAGU-GUU 5'  
AT5G39050.1 888 908  
Anthocyanin acyltransferase - like protein

SRNA\_AG01\_SoLexa\_Mi2008\_1\_23339\_hit9  
5' UAGGUACAACUCGGUUGGAGGG

leaves\_1sup\_AG01\_Solexa\_Mi\_Cell\_2008\_hit\_target\_site.txt

|||||  
CGCCAUGUUGAGCC-ACCUCCC 5'  
AT5G39080.1 390 410  
acyltransferase -like protein

SRNA\_AG01\_Solexa\_Mi2008\_13\_4545\_hit1  
5' CAAGAAAGAUGGUUGUCGUU  
|||||  
ACUCUUUGUACCAACAGCAA 5'  
AT5G39080.1 532 551  
acyltransferase -like protein

SRNA\_AG01\_Solexa\_Mi2008\_1\_54777\_hit1  
5' UUUCCAAAAGCUGCCGGU-UCUG  
|||||  
AAAGGUUUUCGA-GGCCAUAGAA 5'  
AT5G39090.1 1090 1111  
acyltransferase -like protein

SRNA\_AG01\_Solexa\_Mi2008\_3\_40895\_hit1  
5' UGGAUGAUGAGAGAGA-GAU  
:|||||  
GCCUACUCCUCUCUCCUA 5'  
AT5G39090.1 207 226  
acyltransferase -like protein

SRNA\_AG01\_Solexa\_Mi2008\_1\_36103\_hit1  
5' UGAGCCCAAGA-UUGACAACAC  
|||||  
ACUCGGGUUCUAAACUCUU-UG 5'  
AT5G39090.1 531 551  
acyltransferase -like protein

SRNA\_AG01\_Solexa\_Mi2008\_1\_36793\_hit1  
5' UGAGUGACGCCGACGAGUUAG  
|||||  
ACUCACUGCGGCUGCUAAUC 5'  
AT5G39090.1 61 81  
acyltransferase -like protein

SRNA\_AG01\_Solexa\_Mi2008\_1\_13420\_hit2  
5' GAAGAA-GAAGAAGACUCUU  
|||  
CUU-UUGCUUCUUCUGAGAG 5'  
AT5G39090.1 785 803  
acyltransferase -like protein

SRNA\_AG01\_Solexa\_Mi2008\_1\_17319\_hit1  
5' UAACCAAAGCAAUUGAUCGGA  
|||||  
UGUGGUUCGUUUA-CUAGCCU 5'  
AT5G39580.2 92 112  
peroxidase ATP24a

SRNA\_AG01\_Solexa\_Mi2008\_2\_19236\_hit1  
5' UACACAACAUCUGAUGGACUA  
|||||  
UUGUGUUCUAGACUACCUGAA 5'  
AT5G40450.2 1334 1354  
unknown protein

SRNA\_AG01\_Solexa\_Mi2008\_6\_10413\_hit1  
5' CUAGUUCGUCGAUAUGUUG

leaves\_1sup\_AG01\_SoLexa\_Mi\_Cell\_2008\_hit\_target\_site.txt

|| |||||  
GA-CAAGCAGCUAUA-AAG 5'  
AT5G40450.2 2425 2441  
unknown protein

SRNA\_AG01\_SoLexa\_Mi2008\_1\_32975\_hit1  
5' UCUAGUUCGUCGAUAUGUU  
||| |||||  
AGA-CAAGCAGCUAUA-AA 5'  
AT5G40450.2 2426 2442  
unknown protein

SRNA\_AG01\_SoLexa\_Mi2008\_1\_39819\_hit1  
5' UGGAAUAAUUUCAGGAUAGGU  
|||||  
ACCUUAAUAAAG-CC-AUCCC 5'  
AT5G40450.2 4704 4722  
unknown protein

SRNA\_AG01\_SoLexa\_Mi2008\_1\_27991\_hit1  
5' UCAGAAACCCUAAUUUCGUGGG  
||| |||||  
AGUGUUUGGGAUUAAAGAACCU 5'  
AT5G40480.1 1489 1510  
nuclear pore protein -like

SRNA\_AG01\_SoLexa\_Mi2008\_1\_36711\_hit4  
5' UGAGUAGCAAGAGAUGGAGAAA  
|||| |||||  
ACUC-UCGUUCUCUCCUCUUU 5'  
AT5G40480.1 154 174  
nuclear pore protein -like

SRNA\_AG01\_SoLexa\_Mi2008\_1\_53211\_hit1  
5' UUGGUUGGUUC-UUGACAGUCA  
||||| | |||||  
AACCAACCA-GUAACUGUCAGA 5'  
AT5G40480.1 4607 4627  
nuclear pore protein -like

SRNA\_AG01\_SoLexa\_Mi2008\_5\_4358\_hit1  
5' CAACAGAAGAAUUUCA-ACAG  
||||| ||| || |||||  
GUUGUCUUCUCAA-UUGUGUC 5'  
AT5G40480.1 983 1003  
nuclear pore protein -like

SRNA\_AG01\_SoLexa\_Mi2008\_2\_156\_hit1  
5' AAAACCCGGUGGAUAAAAU  
||||| |:|||||  
UUUUGG-CUACCUAUUUUA 5'  
AT5G40770.1 1437 1454  
prohibitin (gb|AAC49691.1)

SRNA\_AG01\_SoLexa\_Mi2008\_1\_3\_hit25  
5' AAAAAAAAAAAAAAGAAAGA  
||||| |||  
UUUUUUUUUUUCUAUCU 5'  
AT5G41400.1 644 662  
RING zinc finger protein-like

SRNA\_AG01\_SoLexa\_Mi2008\_1\_3\_hit25  
5' AAAAAAAAAAAAAAGAAAGA

leaves\_1sup\_AG01\_SoLexa\_Mi\_Cell\_2008\_hit\_target\_site.txt

```
|||||
UUUUUUUUUUUUUU-UUUCU 5'
AT5G41400.1 649 666
RING zinc finger protein-like
```

```
SRNA_AG01_SoLexa_Mi2008_1_1776_hit10
5' AGAA-AAAAAAAAAAAAAAAAAU
| || |||||
UAUUGUUUUUUUUUUUUUUUC 5'
AT5G41400.1 650 671
RING zinc finger protein-like
```

```
SRNA_AG01_SoLexa_Mi2008_2_47828_hit1
5' UUAGGGUGUCAAAAUUGUC-AAA
||||:|||| |||||
AAUCUCACUGUUUUUACAGAUUU 5'
AT5G42100.2 1375 1398
beta-1,3-glucanase - like predicted GPI-anchored protein
```

```
SRNA_AG01_SoLexa_Mi2008_1_17833_hit2
5' UAAGAGAGAGAUUGAGAAUAG
| |||||
AGUCUCUCUCUAACUCUU-UC 5'
AT5G42440.1 13 32
serine/threonine protein kinase-like protein
```

```
SRNA_AG01_SoLexa_Mi2008_1_25234_hit1
5' UAUGAACUUGAUGACCCGCC
|||||
AUACUUGAACUACUGGGCGGG 5'
AT5G42650.1 1051 1071
allene oxide synthase (emb|CAA73184.1)
```

```
SRNA_AG01_SoLexa_Mi2008_1_15261_hit5
5' GGGUCGAGUGAUGUGAUUGAG
: || ||||| |||||
UCC-GCUCACAACACUAACUC 5'
AT5G42650.1 4 23
allene oxide synthase (emb|CAA73184.1)
```

```
SRNA_AG01_SoLexa_Mi2008_1_12824_hit1
5' CUUGAUUCUUCUGAUAAUGGU
||||| ||| |||
UAACUAAGAAGACCAUU-CCA 5'
AT5G42830.1 55 74
N-hydroxycinnamoyl/benzoyltransferase-like protein
```

```
SRNA_AG01_SoLexa_Mi2008_1_38180_hit1
5' UGCAGUGUACUCUGGUAUGGU
|||||
ACGUCACAUGAGACCAUACCA 5'
AT5G43450.1 1094 1114
1-aminocyclopropane-1-carboxylate oxidase
```

```
SRNA_AG01_SoLexa_Mi2008_1_18828_hit1
5' UAAUGGGUGAGGAACUACUUAU
|||| ||||| |||
CUUACCAACUCCUUGA-GAUA 5'
AT5G43450.1 1250 1269
1-aminocyclopropane-1-carboxylate oxidase
```

```
SRNA_AG01_SoLexa_Mi2008_5_6056_hit1
5' CAGAGCAUAAACAUAGCC
```

leaves\_1sup\_AG01\_SoLexa\_Mi\_Cell\_2008\_hit\_target\_site.txt

|||||  
GUCUCGUUUUUUUUU-UU-GG 5'  
AT5G43450.1 717 733  
1-aminocyclopropane-1-carboxylate oxidase

SRNA\_AG01\_SoLexa\_Mi2008\_7\_36003\_hit1  
5' UGAGAUUUUCAAG-UC-GUCUA  
|||||  
ACUCUAAAAGUUCUAAACAGAU 5'  
AT5G45380.1 1488 1509  
urea active transporter-like protein

SRNA\_AG01\_SoLexa\_Mi2008\_3\_7090\_hit2  
5' CAUCUGUUUUUGAUCUAUCAG  
|| |||||:|||||  
GU-GACAAAUUAGUAUAGUA 5'  
AT5G45510.2 1916 1935  
unknown protein

SRNA\_AG01\_SoLexa\_Mi2008\_1\_6039\_hit2  
5' CAGAGAGUCUGAUUUC-AAGAACA  
|||||  
GUCUCUCAGACCAUCGUUUUCUUGU 5'  
AT5G45510.2 348 371  
unknown protein

SRNA\_AG01\_SoLexa\_Mi2008\_6\_44162\_hit1  
5' UGUAGAUUUUCACGUUCUCCUC  
||| ||||| |||||  
ACA-CUAAAGUUCAAGAGGAG 5'  
AT5G45510.2 3493 3512  
unknown protein

SRNA\_AG01\_SoLexa\_Mi2008\_1\_29526\_hit2  
5' UCCA-GUGAUACUUCUCAAGUC  
|||| | |||||  
AGGUUCUCUAUGAAGAGUU-AG 5'  
AT5G45510.2 573 593  
unknown protein

SRNA\_AG01\_SoLexa\_Mi2008\_1\_53286\_hit1  
5' UUGUAAGUCCUGGAAACCCAAA  
||||| ||||| |||||  
AACAU-CAGGAGCUUUGGGUUU 5'  
AT5G45670.1 352 372  
GDSL-motif lipase/hydrolase-like protein

SRNA\_AG01\_SoLexa\_Mi2008\_10\_40396\_hit1  
5' UGGAGCAGGAUAGUGACGUGA  
|||||:||||| |||||  
ACCUCGUUCUAUCACU-CACU 5'  
AT5G45670.1 79 98  
GDSL-motif lipase/hydrolase-like protein

SRNA\_AG01\_SoLexa\_Mi2008\_5\_5834\_hit1  
5' CACUGUUGUGC-AAGAGAU CGA  
||||| || |||||  
GUGACAACACGCUU-UCUAGCU 5'  
AT5G45800.1 608 628  
receptor kinase-like protein

SRNA\_AG01\_SoLexa\_Mi2008\_1\_27959\_hit1  
5' UCACUGUUGUGC-AAGAGAU CGA

leaves\_1sup\_AG01\_SoLexa\_Mi\_Cell\_2008\_hit\_target\_site.txt

|||||  
AGUGACAACACGCUU-UCUAGCU 5'  
AT5G45800.1 608 629  
receptor kinase-like protein

SRNA\_AG01\_SoLexa\_Mi2008\_2\_411\_hit5  
5' AAA-GAUGAAGAGAGAAAGAGA  
||| | |||||  
UUUACCACUUCUCUCUUUCUAU 5'  
AT5G45800.1 69 90  
receptor kinase-like protein

SRNA\_AG01\_SoLexa\_Mi2008\_1\_37976\_hit1  
5' UGCAGAAAUACAAAUGUAUGUG  
||| | ||||| :  
ACGUCUUUAUGUUUACA-ACUU 5'  
AT5G46230.1 548 568  
unknown protein

SRNA\_AG01\_SoLexa\_Mi2008\_2\_30665\_hit1  
5' UCGAGAAGAUUCUGA-AGAGAG  
||| | |||||  
AGCUCUUCUACGACUCUCUCUC 5'  
AT5G46410.2 127 148  
unknown protein

SRNA\_AG01\_SoLexa\_Mi2008\_1\_42884\_hit1  
5' UGG-UACAGAUGAUGAUGACUUA  
||| | |||||  
ACCUAUUGUCUACUACUA-UGAAG 5'  
AT5G46580.1 2135 2157  
putative protein

SRNA\_AG01\_SoLexa\_Mi2008\_1\_3344\_hit1  
5' AUGG-UACAGAUGAUGAUGAC  
||| | |||||  
UACCUAUUGUCUACUACUA-UG 5'  
AT5G46580.1 2138 2158  
putative protein

SRNA\_AG01\_SoLexa\_Mi2008\_1\_53132\_hit2  
5' UUGGUG-UUGGUUGUGUGGU  
: ||||| ||| |||||  
GACCACCAAC-AACACCACCA 5'  
AT5G46760.1 111 130  
putative transcription factor BHLH5

SRNA\_AG01\_SoLexa\_Mi2008\_2\_10088\_hit1  
5' CUAGAACGAUUUUGGGUUUCA  
||| | |||||  
AAUCUU-C-AAUACCCAAAGU 5'  
AT5G47200.1 896 914

SRNA\_AG01\_SoLexa\_Mi2008\_2\_6120\_hit1  
5' CAGAUAC-AAAACGUAAAGAU  
||| | |||||  
AUCUA-GCUUUUGCAUUUCUA 5'  
AT5G48180.1 214 233  
unknown protein

SRNA\_AG01\_SoLexa\_Mi2008\_1\_29127\_hit1  
5' UCAUUGGGCUCAGUAUCAUA  
||| | |||||

leaves\_1sup\_AG01\_SoLexa\_Mi\_Cell\_2008\_hit\_target\_site.txt

AGUAACCAGAGUCAUAGUUAU 5'  
AT5G48180.1 374 393  
unknown protein

SRNA\_AG01\_SoLexa\_Mi2008\_1\_37225\_hit4  
5' UGAUGAUGAUGAUGAUGAAGAAG  
|||||||:|||||||  
ACUACUACUACUACUUCUU 5'  
AT5G48380.1 145 167  
receptor-like protein kinase

SRNA\_AG01\_SoLexa\_Mi2008\_1\_34620\_hit1  
5' UGAAGAUGAUGAUGAAGUU  
||| |||||  
ACUACUACUACUUCUU 5'  
AT5G48380.1 146 164  
receptor-like protein kinase

SRNA\_AG01\_SoLexa\_Mi2008\_1\_37225\_hit4  
5' UGAUGAUGAUGAUGAUGAAGAAG  
||||||| |||||  
ACUACUACUACUACUUC 5'  
AT5G48380.1 148 170  
receptor-like protein kinase

SRNA\_AG01\_SoLexa\_Mi2008\_9\_14254\_hit8  
5' GAUGAUGAUGAUGAUGAUCUU  
|||||||  
CUACUACUACUACUUCUU 5'  
AT5G48380.1 149 169  
receptor-like protein kinase

SRNA\_AG01\_SoLexa\_Mi2008\_6\_14255\_hit369  
5' GAUGAUGAUGAUGAUGAUGAU  
:|||||||  
UUACUACUACUACUUCUU 5'  
AT5G48380.1 149 172  
receptor-like protein kinase

SRNA\_AG01\_SoLexa\_Mi2008\_1\_14256\_hit8  
5' GAUGAUGAUGAUGAUGAUGUU  
:|||||||  
UUACUACUACUACUUCUU 5'  
AT5G48380.1 149 172  
receptor-like protein kinase

SRNA\_AG01\_SoLexa\_Mi2008\_7\_3078\_hit1  
5' AUGAUGAUGA-GAAUGAUGAU  
||||||| || |||||  
UACUACUACU-ACUUCUU 5'  
AT5G48380.1 150 169  
receptor-like protein kinase

SRNA\_AG01\_SoLexa\_Mi2008\_1\_36323\_hit13  
5' UGAGGAUGAUGAUGAUGAUGA  
||| |||||  
ACUACUACUACUACU 5'  
AT5G48380.1 150 170  
receptor-like protein kinase

SRNA\_AG01\_SoLexa\_Mi2008\_1\_3079\_hit472  
5' AUGAUGAUGAUGAUGAUGA  
|||||||

leaves\_1sup\_AG01\_SoLexa\_Mi\_Cell\_2008\_hit\_target\_site.txt

UACUACUACUACUACUACUACU 5'  
AT5G48380.1 150 171  
receptor-like protein kinase

SRNA\_AG01\_SoLexa\_Mi2008\_1\_45039\_hit3  
5' UGUGAUGAUGAUGAUGAUGAUGA  
:|||||  
UUACUACUACUACUACUACU 5'  
AT5G48380.1 150 172  
receptor-like protein kinase

SRNA\_AG01\_SoLexa\_Mi2008\_1\_56092\_hit3  
5' UUUG-UGAUGAUGAUGAUGAUGA  
|||||  
AAACUACUACUACUACUACU 5'  
AT5G48380.1 151 173  
receptor-like protein kinase

SRNA\_AG01\_SoLexa\_Mi2008\_7\_3078\_hit1  
5' AUGAUGAUGA-GAAUGAUGAU  
||||| |  
UACUACUACUAC-UACUACUA 5'  
AT5G48380.1 153 172  
receptor-like protein kinase

SRNA\_AG01\_SoLexa\_Mi2008\_6\_14255\_hit369  
5' GAUGA-UGAUGAUGAUGAUGAUGAU  
:|||||  
UUACUUACUACUACUACUACUA 5'  
AT5G48380.1 153 177  
receptor-like protein kinase

SRNA\_AG01\_SoLexa\_Mi2008\_1\_45039\_hit3  
5' UGUGA-UGAUGAUGAUGAUGAUGA  
||| |  
UAACUUACUACUACUACUACU 5'  
AT5G48380.1 154 177  
receptor-like protein kinase

SRNA\_AG01\_SoLexa\_Mi2008\_1\_39699\_hit1  
5' UGGAACUGAUGAUGAUGAUGA  
|:|||||  
AUCUU-ACUACUACUACUACU 5'  
AT5G48380.1 157 176  
receptor-like protein kinase

SRNA\_AG01\_SoLexa\_Mi2008\_1\_3414\_hit1  
5' AUGGUUG-C-UCUGCUUUGCUG  
||||| |  
UACCAACCGGAGACGAAACGAU 5'  
AT5G48380.1 2113 2134  
receptor-like protein kinase

SRNA\_AG01\_SoLexa\_Mi2008\_1\_2\_hit38  
5' AAAAAAAAAA-AAAACCAU  
||||| |  
CUUUUUUUUUUCUUUUGGUU 5'  
AT5G48380.1 2693 2712  
receptor-like protein kinase

SRNA\_AG01\_SoLexa\_Mi2008\_7\_132\_hit1  
5' AAAAAUCACGGGUUCUCUA  
||||| |

leaves\_1sup\_AG01\_SoLexa\_Mi\_Cell\_2008\_hit\_target\_site.txt

GUUUUAGUCCCAAGAGAA 5'  
AT5G48380.1 329 347  
receptor-like protein kinase

SRNA\_AG01\_SoLexa\_Mi2008\_3\_56550\_hit1  
5' UUUU-GGGUGCGAUUUUGGUUA  
||||| ||||| |||||:|||||  
AAAACCCCA-GCUAAAGCCAAU 5'  
AT5G48540.1 464 484  
33 kDa secretory protein-like

SRNA\_AG01\_SoLexa\_Mi2008\_4\_46129\_hit1  
5' UGUUUUGAUGGUUGU-UGUA  
||||| ||||| ||||| |||  
ACAAA-CUACCAACAUACAA 5'  
AT5G48657.2 340 358  
unknown protein

SRNA\_AG01\_SoLexa\_Mi2008\_4\_46129\_hit1  
5' UGUUUUGAUGGUUGU-UGUA  
||||| ||||| ||||| |||  
ACAAA-CUACCAACAUACAA 5'  
AT5G48657.1 854 872  
unknown protein

SRNA\_AG01\_SoLexa\_Mi2008\_2\_501\_hit1  
5' AA-AGGAGGUGAAUUAUAAGG-UU  
|| ||||| ||||| ||||| ||  
UUAUCCUCCACUUUUUCCUAA 5'  
AT5G48657.2 882 904  
unknown protein

SRNA\_AG01\_SoLexa\_Mi2008\_1\_6472\_hit1  
5' CAGGAGG-AGAAAGAGUAGGUU  
||||| ||||| ||||| |||||  
GUCCUCCUUCUUCUACUCCUC 5'  
AT5G49280.1 30 51  
predicted GPI-anchored protein

SRNA\_AG01\_SoLexa\_Mi2008\_1\_35281\_hit5  
5' UGACAGUGAUGAUGAUGACGC  
||| | ||||| ||||| |||||  
ACU-U-ACUACUACUACUGCG 5'  
AT5G49520.1 1018 1036  
unknown protein

SRNA\_AG01\_SoLexa\_Mi2008\_1\_13759\_hit1  
5' GACGA-UGAUGAUGAUGACA  
|| || ||||| ||||| |||||  
CU-CUUACUACUACUACUGC 5'  
AT5G49520.1 1019 1037  
unknown protein

SRNA\_AG01\_SoLexa\_Mi2008\_1\_40485\_hit1  
5' UGGAGGAAUGAUGAUGAUGUG  
||||| ||||| ||||| |||||  
ACCUC-UUACUACUACUACUG 5'  
AT5G49520.1 1020 1039  
unknown protein

SRNA\_AG01\_SoLexa\_Mi2008\_1\_7157\_hit1  
5' CAUGAUGAUGAUGAACUGGU  
||||| ||||| ||||| |||||

leaves\_1sup\_AG01\_SoLexa\_Mi\_Cell\_2008\_hit\_target\_site.txt

UUACUACUACUACCGGACCU 5'  
AT5G49520.1 1148 1168  
unknown protein

SRNA\_AG01\_SoLexa\_Mi2008\_1\_37226\_hit1  
5' UGAUGAUGAUGGUACCAUGGU  
|||||  
ACUACUACUACC-UGG-ACCU 5'  
AT5G49520.1 1149 1167  
unknown protein

SRNA\_AG01\_SoLexa\_Mi2008\_1\_55151\_hit1  
5' UUUGAGAGUAGUAGCUUGAGA  
:|||||  
GAACU-UCAUCUUCGAACUCU 5'  
AT5G49520.1 1192 1211  
unknown protein

SRNA\_AG01\_SoLexa\_Mi2008\_1\_3079\_hit472  
5' AUGAUGAUGAUGAUG-AUGAUGA  
|||||  
UACUACUACUACUACGAACU-CU 5'  
AT5G49520.1 235 256  
unknown protein

SRNA\_AG01\_SoLexa\_Mi2008\_1\_51111\_hit1  
5' UUGAUGAUGAUGAUGGUUUGA  
|||||  
AACUACUACUACUA-CGAACU 5'  
AT5G49520.1 237 256  
unknown protein

SRNA\_AG01\_SoLexa\_Mi2008\_2\_22880\_hit6  
5' UAGGCAGAGAAGAGCAUCCA  
|||||  
UUCCGUCUCUUCUCGAAGGA 5'  
AT5G49610.1 1212 1231  
unknown protein

SRNA\_AG01\_SoLexa\_Mi2008\_13\_13620\_hit1  
5' GACAGAAGCAAUCAAC-CUA  
|||||  
AUGUCUUCUUUAGUUGAGAU 5'  
AT5G49610.1 1411 1430  
unknown protein

SRNA\_AG01\_SoLexa\_Mi2008\_2\_56650\_hit2  
5' UUUUUCAGGAUUGGUUGAU  
:|||||  
GAAAAGUCCUUACGAACUU 5'  
AT5G49610.1 507 525  
unknown protein

SRNA\_AG01\_SoLexa\_Mi2008\_3\_4134\_hit1  
5' CAAAGGACCUAUGGUAACUCAG  
|||||  
AUUUC-UGGAUACCAUUG-GUC 5'  
AT5G49610.1 681 700  
unknown protein

SRNA\_AG01\_SoLexa\_Mi2008\_1\_20881\_hit10  
5' UAGAAGAAGGUUGGUUAGUGU  
|||||

leaves\_1sup\_AG01\_SoLexa\_Mi\_Cell\_2008\_hit\_target\_site.txt

AUCUUCUCCAA-CAA-CACC 5'  
 AT5G49630.1 917 935  
 amino acid permease 6 (emb|CAA65051.1)

SRNA\_AG01\_SoLexa\_Mi2008\_2\_44959\_hit1  
 5' UG-UGACUGUGAUGAAACUCCAA  
 || ||||| ||||| ||||| ||||| |||||  
 ACUACUGAAACUACUUUGAAGAU 5'  
 AT5G49760.1 1950 1972  
 receptor protein kinase-like

SRNA\_AG01\_SoLexa\_Mi2008\_3\_3062\_hit1  
 5' AUGAGUUGUU-UCAGGGUCUU  
 ||||| || ||||| ||||| |||||  
 UACUCAA-AAGAGUCCAGAG 5'  
 AT5G49760.1 2649 2668  
 receptor protein kinase-like

SRNA\_AG01\_SoLexa\_Mi2008\_5\_1374\_hit1  
 5' ACAGAGAAUUUGAGAUACA  
 ||||| ||||| ||||| ||||| |||||  
 AAACUCUAAAACUCUAUGU 5'  
 AT5G49980.1 260 278  
 transport inhibitor response 1 protein

SRNA\_AG01\_SoLexa\_Mi2008\_2\_13419\_hit2  
 5' GAAGAAGAAGAAGACA-CUU  
 ||||| ||||| ||||| ||||| |||||  
 CUUCUUCUUCUUCU-UCGAA 5'  
 AT5G49980.1 66 84  
 transport inhibitor response 1 protein

SRNA\_AG01\_SoLexa\_Mi2008\_1\_27863\_hit1  
 5' UCACUAAU-GACAAUGAGUGUC  
 ||| |||| ||||| ||||| ||||| |||||  
 AGU-AUUAUCUGUUACUCACAA 5'  
 AT5G50160.1 1170 1190  
 FRO1 and FRO2-like protein

SRNA\_AG01\_SoLexa\_Mi2008\_1\_53198\_hit1  
 5' UUGGUUGCGAUGAUGAUGUUG  
 ||| ||| ||||| ||||| ||||| |||||  
 AAC-AAC-CUACUACUACAAC 5'  
 AT5G50160.1 296 314  
 FRO1 and FRO2-like protein

SRNA\_AG01\_SoLexa\_Mi2008\_1\_21052\_hit1  
 5' UAGACCAAACCGUGAUAGU  
 ||||| ||||| || |||||  
 AUCUGGUUUGGA-AC-AUCG 5'  
 AT5G50160.1 527 544  
 FRO1 and FRO2-like protein

SRNA\_AG01\_SoLexa\_Mi2008\_1\_13614\_hit8  
 5' GACAGAAGAGAGAGAGCAC  
 || ||||| ||||| ||||| ||||| |||||  
 CU-UCUUCUCUCUCU-GUA 5'  
 AT5G50160.1 556 572  
 FRO1 and FRO2-like protein

SRNA\_AG01\_SoLexa\_Mi2008\_2\_8245\_hit1  
 5' CGAAAAGAAGAAGAUGAUGAG  
 ||||| ||||| || |||||

leaves\_1sup\_AG01\_SoLexa\_Mi\_Cell\_2008\_hit\_target\_site.txt

GCUUUUCUUCUUCU-CU-CUC 5'  
AT5G50160.1 560 578  
FRO1 and FRO2-like protein

SRNA\_AG01\_SoLexa\_Mi2008\_1\_24933\_hit1  
5' UAUCCAAAACACCACCCGGUCC  
:||||| |||| ||||  
GUAGGUUUUGUUGUGGACCAGG 5'  
AT5G50200.1 252 273  
unknown protein

SRNA\_AG01\_SoLexa\_Mi2008\_1\_24933\_hit1  
5' UAUCCAAAACACCACCCGGUCC  
:||||| |||| ||||  
GUAGGUUUUGUUGUGGACCAGG 5'  
AT5G50200.3 266 287  
unknown protein

SRNA\_AG01\_SoLexa\_Mi2008\_1\_24933\_hit1  
5' UAUCCAAAACACCACCCGGUCC  
:||||| |||| ||||  
GUAGGUUUUGUUGUGGACCAGG 5'  
AT5G50200.2 275 296  
unknown protein

SRNA\_AG01\_SoLexa\_Mi2008\_70\_10006\_hit7  
5' CUACUAUGU-AUGGUUACGUCA  
||| ||| | |||||  
GAU-AUAAAGUACCAAUGCAGU 5'  
AT5G50200.3 34 54  
unknown protein

SRNA\_AG01\_SoLexa\_Mi2008\_4\_5934\_hit1  
5' CAGAAGAGAGUGAGCACAU  
||||| |||||  
GUCUUCUCUCUCGUGUU 5'  
AT5G50670.1 1099 1117  
putative protein

SRNA\_AG01\_SoLexa\_Mi2008\_15\_1354\_hit1  
5' ACAGAAGAGAGUGAGCACAU  
||||| |||||  
UGUCUUCUCUCUCGUGUU 5'  
AT5G50670.1 1099 1118  
putative protein

SRNA\_AG01\_SoLexa\_Mi2008\_15\_35242\_hit1  
5' UGACAGAAGAGAGUGAGCACAU  
||||| |||||  
ACUGUCUUCUCUCUCGUGUU 5'  
AT5G50670.1 1099 1120  
putative protein

SRNA\_AG01\_SoLexa\_Mi2008\_3\_35247\_hit2  
5' UGACAGAAGAUAGAGAGCACUA  
||||| ||||| |  
ACUGUCUUCUCUCUCGUGUU 5'  
AT5G50670.1 1099 1120  
putative protein

SRNA\_AG01\_SoLexa\_Mi2008\_1\_1352\_hit1  
5' ACAGAAGAGAGAGAGCACU  
|||||

leaves\_1sup\_AG01\_SoLexa\_Mi\_Cell\_2008\_hit\_target\_site.txt

UGUCUUCUCUCUCUCGUGU 5'  
AT5G50670.1 1100 1118  
putative protein

SRNA\_AG01\_SoLexa\_Mi2008\_70\_1353\_hit7  
5' ACAGAAGAGAGUGAGCACA  
|||||  
UGUCUUCUCUCUCUCGUGU 5'  
AT5G50670.1 1100 1118  
putative protein

SRNA\_AG01\_SoLexa\_Mi2008\_83\_1355\_hit2  
5' ACAGAAGAUAGAGAGCACU  
|||||  
UGUCUUCUCUCUCUCGUGU 5'  
AT5G50670.1 1100 1118  
putative protein

SRNA\_AG01\_SoLexa\_Mi2008\_1\_13615\_hit4  
5' GACAGAAGAGAGAGAGCACA  
|||||  
CUGUCUUCUCUCUCUCGUGU 5'  
AT5G50670.1 1100 1119  
putative protein

SRNA\_AG01\_SoLexa\_Mi2008\_150\_13617\_hit7  
5' GACAGAAGAGAGAGAGCACA  
|||||  
CUGUCUUCUCUCUCUCGUGU 5'  
AT5G50670.1 1100 1119  
putative protein

SRNA\_AG01\_SoLexa\_Mi2008\_161\_13619\_hit2  
5' GACAGAAGAUAGAGAGCACU  
|||||  
CUGUCUUCUCUCUCUCGUGU 5'  
AT5G50670.1 1100 1119  
putative protein

SRNA\_AG01\_SoLexa\_Mi2008\_2\_8397\_hit1  
5' CGACAGAAGAGAGAGAGCACA  
|||||  
ACUGUCUUCUCUCUCUCGUGU 5'  
AT5G50670.1 1100 1120  
putative protein

SRNA\_AG01\_SoLexa\_Mi2008\_2\_35238\_hit4  
5' UGACAGAAGAGAGAGAGCACA  
|||||  
ACUGUCUUCUCUCUCUCGUGU 5'  
AT5G50670.1 1100 1120  
putative protein

SRNA\_AG01\_SoLexa\_Mi2008\_714\_35241\_hit6  
5' UGACAGAAGAGAGAGAGCACA  
|||||  
ACUGUCUUCUCUCUCUCGUGU 5'  
AT5G50670.1 1100 1120  
putative protein

SRNA\_AG01\_SoLexa\_Mi2008\_4\_35245\_hit2  
5' UGACAGAAGAUAGAGAGCACU  
|||||

leaves\_1sup\_AG01\_SoLexa\_Mi\_Cell\_2008\_hit\_target\_site.txt

ACUGUCUUCUCUCUCUGUGU 5'  
AT5G50670.1 1100 1120  
putative protein

SRNA\_AG01\_SoLexa\_Mi2008\_66\_35246\_hit2  
5' UGACAGAAGAUAGAGAGCACU  
|||||  
ACUGUCUUCUCUCUCUGUGU 5'  
AT5G50670.1 1100 1120  
putative protein

SRNA\_AG01\_SoLexa\_Mi2008\_2\_11428\_hit3  
5' CUGACAGAAGAGAGUGAGCAC  
|||||  
UACUGUCUUCUCUCUCUGUGU 5'  
AT5G50670.1 1100 1121  
putative protein

SRNA\_AG01\_SoLexa\_Mi2008\_16\_11431\_hit1  
5' CUGACAGAAGAUAGAGAGCACU  
|||||  
UACUGUCUUCUCUCUCUGUGU 5'  
AT5G50670.1 1100 1121  
putative protein

SRNA\_AG01\_SoLexa\_Mi2008\_14\_50261\_hit1  
5' UUGACAGAAGAGAGUGAGCAC  
|||||  
UACUGUCUUCUCUCUCUGUGU 5'  
AT5G50670.1 1100 1121  
putative protein

SRNA\_AG01\_SoLexa\_Mi2008\_29\_50265\_hit2  
5' UUGACAGAAGAUAGAGAGCAC  
|||||  
UACUGUCUUCUCUCUCUGUGU 5'  
AT5G50670.1 1100 1121  
putative protein

SRNA\_AG01\_SoLexa\_Mi2008\_449\_50266\_hit1  
5' UUGACAGAAGAUAGAGAGCACU  
|||||  
UACUGUCUUCUCUCUCUGUGU 5'  
AT5G50670.1 1100 1121  
putative protein

SRNA\_AG01\_SoLexa\_Mi2008\_6\_13612\_hit1  
5' GACAGAAGAAAGAGAGCAC  
|||||  
CUGUCUUCUCUCUCUGUG 5'  
AT5G50670.1 1101 1119  
putative protein

SRNA\_AG01\_SoLexa\_Mi2008\_1\_13614\_hit8  
5' GACAGAAGAGAGAGAGCAC  
|||||  
CUGUCUUCUCUCUCUGUG 5'  
AT5G50670.1 1101 1119  
putative protein

SRNA\_AG01\_SoLexa\_Mi2008\_480\_13616\_hit7  
5' GACAGAAGAGAGUGAGCAC  
|||||

leaves\_1sup\_AG01\_SoLexa\_Mi\_Cell\_2008\_hit\_target\_site.txt

CUGUCUUCUCUCUCUGUG 5'  
AT5G50670.1 1101 1119  
putative protein

SRNA\_AG01\_SoLexa\_Mi2008\_855\_13618\_hit4  
5' GACAGAAGAUAGAGAGCAC  
||||||| |||||  
CUGUCUUCUCUCUCUGUG 5'  
AT5G50670.1 1101 1119  
putative protein

SRNA\_AG01\_SoLexa\_Mi2008\_3\_8396\_hit1  
5' CGACAGAAGAGAGUGAGCAC  
||||||| |||||  
ACUGUCUUCUCUCUCUGUG 5'  
AT5G50670.1 1101 1120  
putative protein

SRNA\_AG01\_SoLexa\_Mi2008\_6\_35236\_hit1  
5' UGACAGAAGAAAGAGAGCAC  
||||||| |||||  
ACUGUCUUCUCUCUCUGUG 5'  
AT5G50670.1 1101 1120  
putative protein

SRNA\_AG01\_SoLexa\_Mi2008\_12\_35237\_hit8  
5' UGACAGAAGAGAGAGAGCAC  
||||||| |||||  
ACUGUCUUCUCUCUCUGUG 5'  
AT5G50670.1 1101 1120  
putative protein

SRNA\_AG01\_SoLexa\_Mi2008\_2091\_35240\_hit6  
5' UGACAGAAGAGAGUGAGCAC  
||||||| |||||  
ACUGUCUUCUCUCUCUGUG 5'  
AT5G50670.1 1101 1120  
putative protein

SRNA\_AG01\_SoLexa\_Mi2008\_193\_35244\_hit4  
5' UGACAGAAGAUAGAGAGCAC  
||||||| |||||  
ACUGUCUUCUCUCUCUGUG 5'  
AT5G50670.1 1101 1120  
putative protein

SRNA\_AG01\_SoLexa\_Mi2008\_28\_11427\_hit3  
5' CUGACAGAAGAGAGUGAGCAC  
||||||| |||||  
UACUGUCUUCUCUCUCUGUG 5'  
AT5G50670.1 1101 1121  
putative protein

SRNA\_AG01\_SoLexa\_Mi2008\_79\_11430\_hit1  
5' CUGACAGAAGAUAGAGAGCAC  
||||||| |||||  
UACUGUCUUCUCUCUCUGUG 5'  
AT5G50670.1 1101 1121  
putative protein

SRNA\_AG01\_SoLexa\_Mi2008\_4\_15853\_hit2  
5' GUGACAGAAGAGAGUGAGCAC  
:||||||| |||||

leaves\_1sup\_AG01\_Solexa\_Mi\_Cell\_2008\_hit\_target\_site.txt

UACUGUCUUCUCUCUCUCGUG 5'  
 AT5G50670.1 1101 1121  
 putative protein

sRNA\_AG01\_Solexa\_Mi2008\_12\_50256\_hit1  
 5' UUGACAGAAGAAAGAGAGCAC  
 |||||  
 UACUGUCUUCUCUCUCGUG 5'  
 AT5G50670.1 1101 1121  
 putative protein

sRNA\_AG01\_Solexa\_Mi2008\_14\_50257\_hit5  
 5' UUGACAGAAGAGAGAGAGCAC  
 |||||  
 UACUGUCUUCUCUCUCGUG 5'  
 AT5G50670.1 1101 1121  
 putative protein

sRNA\_AG01\_Solexa\_Mi2008\_1778\_50260\_hit1  
 5' UUGACAGAAGAGAGUGAGCAC  
 |||||  
 UACUGUCUUCUCUCUCGUG 5'  
 AT5G50670.1 1101 1121  
 putative protein

sRNA\_AG01\_Solexa\_Mi2008\_4050\_50264\_hit3  
 5' UUGACAGAAGAUAGAGAGCAC  
 |||||  
 UACUGUCUUCUCUCUCGUG 5'  
 AT5G50670.1 1101 1121  
 putative protein

sRNA\_AG01\_Solexa\_Mi2008\_1\_16138\_hit3  
 5' GUUGACAGAAGAUAGAGAGCAC  
 |||||  
 CUACUGUCUUCUCUCUCGUG 5'  
 AT5G50670.1 1101 1122  
 putative protein

sRNA\_AG01\_Solexa\_Mi2008\_30\_35239\_hit6  
 5' UGACAGAAGAGAGUGAGCA  
 |||||  
 ACUGUCUUCUCUCUCGU 5'  
 AT5G50670.1 1102 1120  
 putative protein

sRNA\_AG01\_Solexa\_Mi2008\_1\_11426\_hit3  
 5' CUGACAGAAGAGAGUGAGCA  
 |||||  
 UACUGUCUUCUCUCUCGU 5'  
 AT5G50670.1 1102 1121  
 putative protein

sRNA\_AG01\_Solexa\_Mi2008\_2\_11429\_hit1  
 5' CUGACAGAAGAUAGAGAGCA  
 |||||  
 UACUGUCUUCUCUCUCGU 5'  
 AT5G50670.1 1102 1121  
 putative protein

sRNA\_AG01\_Solexa\_Mi2008\_16\_50259\_hit1  
 5' UUGACAGAAGAGAGUGAGCA  
 |||||

leaves\_1sup\_AG01\_SoLexa\_Mi\_Cell\_2008\_hit\_target\_site.txt

UACUGUCUUCUCUCUCUCGU 5'  
AT5G50670.1 1102 1121  
putative protein

SRNA\_AG01\_SoLexa\_Mi2008\_122\_50263\_hit3  
5' UUGACAGAAGAUAGAGAGCA  
|||||  
UACUGUCUUCUCUCUCUCGU 5'  
AT5G50670.1 1102 1121  
putative protein

SRNA\_AG01\_SoLexa\_Mi2008\_1\_50258\_hit1  
5' UUGACAGAAGAGAGUGAGC  
|||||  
UACUGUCUUCUCUCUCUCG 5'  
AT5G50670.1 1103 1121  
putative protein

SRNA\_AG01\_SoLexa\_Mi2008\_21\_50262\_hit3  
5' UUGACAGAAGAUAGAGAGC  
|||||  
UACUGUCUUCUCUCUCUCG 5'  
AT5G50670.1 1103 1121  
putative protein

SRNA\_AG01\_SoLexa\_Mi2008\_2\_35025\_hit1  
5' UGAAUGAUGAUG-UGAAAGAA  
|||||  
ACUUACUACUACUA-UUUCUU 5'  
AT5G50670.1 1382 1401  
putative protein

SRNA\_AG01\_SoLexa\_Mi2008\_2\_2745\_hit1  
5' AUAUUUGUUGUAGUGAUAACA  
|||||  
UAUAAAGAACAUCACAAUUGU 5'  
AT5G50670.1 1404 1424  
putative protein

SRNA\_AG01\_SoLexa\_Mi2008\_2\_54927\_hit2  
5' UUUCGGUGUGUUAAGAAUGUC  
|||||  
AAAGCCACACAAUUCUUACAG 5'  
AT5G50670.1 1426 1446  
putative protein

SRNA\_AG01\_SoLexa\_Mi2008\_1\_40228\_hit1  
5' UGGAGACAACAAGGUGAUGGU  
|||||  
ACCUCUGUUGUUC-AC-ACCG 5'  
AT5G50670.1 50 68  
putative protein

SRNA\_AG01\_SoLexa\_Mi2008\_1\_23609\_hit1  
5' UAGUAACCACCGGAGUUUUUUAU  
|||||  
AUCAUUGGUGUCCUAAAAACU 5'  
AT5G50670.1 602 623  
putative protein

SRNA\_AG01\_SoLexa\_Mi2008\_45\_5105\_hit1  
5' CAAUCAAUAGUAGGGUGUCCA  
|||||

leaves\_1sup\_AG01\_SoLexa\_Mi\_Cell\_2008\_hit\_target\_site.txt

GUUAGUUAUCAUCCACAGGU 5'  
AT5G51300.2 1188 1208  
unknown protein

SRNA\_AG01\_SoLexa\_Mi2008\_45\_5105\_hit1  
5' CAAUCAAUAGUAGGGUGUCCA  
|||||  
GUUAGUUAUCAUCCACAGGU 5'  
AT5G51300.3 1219 1239  
unknown protein

SRNA\_AG01\_SoLexa\_Mi2008\_45\_5105\_hit1  
5' CAAUCAAUAGUAGGGUGUCCA  
|||||  
GUUAGUUAUCAUCCACAGGU 5'  
AT5G51300.1 1223 1243  
unknown protein

SRNA\_AG01\_SoLexa\_Mi2008\_1\_17420\_hit1  
5' UAACCUUGAGUUGCUGAUUGAU  
||||| || ||||  
AUUGGAACUCAACCACCAACUC 5'  
AT5G51300.2 1715 1736  
unknown protein

SRNA\_AG01\_SoLexa\_Mi2008\_1\_17420\_hit1  
5' UAACCUUGAGUUGCUGAUUGAU  
||||| || ||||  
AUUGGAACUCAACCACCAACUC 5'  
AT5G51300.3 1746 1767  
unknown protein

SRNA\_AG01\_SoLexa\_Mi2008\_1\_17420\_hit1  
5' UAACCUUGAGUUGCUGAUUGAU  
||||| || ||||  
AUUGGAACUCAACCACCAACUC 5'  
AT5G51300.1 1750 1771  
unknown protein

SRNA\_AG01\_SoLexa\_Mi2008\_1\_1340\_hit1  
5' ACAC-UGAGGUGGUGGUGGU  
|||| |||||  
UGUGUACUCCACCACCA 5'  
AT5G51300.2 1927 1946  
unknown protein

SRNA\_AG01\_SoLexa\_Mi2008\_68\_26867\_hit1  
5' UCAACACUGAGGUGGUGGUGGU  
||| || |||||  
AGU-GU-ACUCCACCACCA 5'  
AT5G51300.2 1927 1946  
unknown protein

SRNA\_AG01\_SoLexa\_Mi2008\_1\_48460\_hit1  
5' UUCAACACUGAGGUGGUGGUGGU  
: ||| || |||||  
GAGU-GU-ACUCCACCACCA 5'  
AT5G51300.2 1927 1947  
unknown protein

SRNA\_AG01\_SoLexa\_Mi2008\_1\_48459\_hit1  
5' UUCAACACUGAGGUGGUGGU  
: ||| || |||||

leaves\_1sup\_AG01\_SoLexa\_Mi\_Cell\_2008\_hit\_target\_site.txt

GAGU-GU-ACUCCACCACCA 5'  
AT5G51300.2 1930 1947  
unknown protein

sRNA\_AG01\_SoLexa\_Mi2008\_1\_1340\_hit1  
5' ACAC-UGAGGUGGUGGUGGU  
||||| |||||  
UGUGUACUCCACCACCACCA 5'  
AT5G51300.3 1958 1977  
unknown protein

SRNA\_AG01\_SoLexa\_Mi2008\_68\_26867\_hit1  
5' UCAACACUGAGGUGGUGGUGGU  
||| ||| |||||  
AGU-GU-ACUCCACCACCACCA 5'  
AT5G51300.3 1958 1977  
unknown protein

sRNA\_AG01\_SoLexa\_Mi2008\_1\_48460\_hit1  
5' UUCAACACUGAGGUGGUGGUGGU  
: ||| ||| |||||  
GAGU-GU-ACUCCACCACCACCA 5'  
AT5G51300.3 1958 1978  
unknown protein

sRNA\_AG01\_SoLexa\_Mi2008\_1\_48459\_hit1  
5' UUCAACACUGAGGUGGUGGUGGU  
: ||| ||| |||||  
GAGU-GU-ACUCCACCACCACCA 5'  
AT5G51300.3 1961 1978  
unknown protein

sRNA\_AG01\_SoLexa\_Mi2008\_1\_1340\_hit1  
5' ACAC-UGAGGUGGUGGUGGU  
||||| |||||  
UGUGUACUCCACCACCACCA 5'  
AT5G51300.1 1962 1981  
unknown protein

SRNA\_AG01\_SoLexa\_Mi2008\_68\_26867\_hit1  
5' UCAACACUGAGGUGGUGGUGGU  
||| ||| |||||  
AGU-GU-ACUCCACCACCACCA 5'  
AT5G51300.1 1962 1981  
unknown protein

sRNA\_AG01\_SoLexa\_Mi2008\_1\_48460\_hit1  
5' UUCAACACUGAGGUGGUGGUGGU  
: ||| ||| |||||  
GAGU-GU-ACUCCACCACCACCA 5'  
AT5G51300.1 1962 1982  
unknown protein

sRNA\_AG01\_SoLexa\_Mi2008\_1\_48459\_hit1  
5' UUCAACACUGAGGUGGUGGUGGU  
: ||| ||| |||||  
GAGU-GU-ACUCCACCACCACCA 5'  
AT5G51300.1 1965 1982  
unknown protein

sRNA\_AG01\_SoLexa\_Mi2008\_6\_3355\_hit1  
5' AUGGUAGUUCAAGUUAUCC  
: ||||| |||||

leaves\_1sup\_AG01\_SoLexa\_Mi\_Cell\_2008\_hit\_target\_site.txt

CGCCAUCAAGUUCA-AAGG 5'  
AT5G51750.1 2082 2099  
serine protease-like protein

SRNA\_AG01\_SoLexa\_Mi2008\_1\_6206\_hit1  
5' CAGAUUGAGAUUAUGAA-GAUUU  
||||| ||||||||| |||||:  
GUCUAUCUCUAAUACUCCUAAG 5'  
AT5G52650.1 722 744  
unknown protein

SRNA\_AG01\_SoLexa\_Mi2008\_1\_6530\_hit1  
5' CAGGCUUCUUCGGUCAAG  
||||||| |||||:|||  
GUCCGAAGAAGCCUAGUAG 5'  
AT5G52740.1 228 246  
putative protein

SRNA\_AG01\_SoLexa\_Mi2008\_1\_41041\_hit1  
5' UGGAUUUUAG-UCAGGUGUGGU  
:||||||| | |||||||||  
GCCUAAA-CUAGUCCACACCA 5'  
AT5G52810.1 622 641  
unknown protein

SRNA\_AG01\_SoLexa\_Mi2008\_3\_35894\_hit1  
5' UGAGAGCA-GAGAAAGAGAGU  
||||||| | |||||||||  
ACUCUCUUUCUCUUUCUCUCU 5'  
AT5G53160.2 27 47  
unknown protein

SRNA\_AG01\_SoLexa\_Mi2008\_1\_46130\_hit14  
5' UG-UUUUGAUUCAGGUACUAC  
|| ||||||||| |||||  
ACUAAAACUAAGUCGAUGAUG 5'  
AT5G53360.1 1072 1092  
ring finger E3 ligase (SINAT5)

SRNA\_AG01\_SoLexa\_Mi2008\_4\_55164\_hit2  
5' UUUGAGCUC-AGGUGGUAGUCA  
||||||| | ||||| |||  
AAACUCGAGCU-CACCAUAAGU 5'  
AT5G53450.2 497 517  
unknown protein

SRNA\_AG01\_SoLexa\_Mi2008\_4\_55164\_hit2  
5' UUUGAGCUC-AGGUGGUAGUCA  
||||||| | ||||| |||  
AAACUCGAGCU-CACCAUAAGU 5'  
AT5G53450.1 566 586  
unknown protein

SRNA\_AG01\_SoLexa\_Mi2008\_1\_33462\_hit2  
5' UCUGCAAA-AGAGUGAAAUGGA  
|||| ||| |||:|||||||  
AGAC-UUUGUCUUACUUUACCU 5'  
AT5G53760.2 1458 1478  
unknown protein

SRNA\_AG01\_SoLexa\_Mi2008\_1\_33462\_hit2  
5' UCUGCAAA-AGAGUGAAAUGGA  
|||| ||| |||:|||||||

leaves\_1sup\_AG01\_SoLexa\_Mi\_Cell\_2008\_hit\_target\_site.txt

AGAC-UUUGUCUUACUUUACCU 5'  
AT5G53760.1 1596 1616  
unknown protein

SRNA\_AG01\_SoLexa\_Mi2008\_3\_12041\_hit2  
5' CUGGUAAAUUU-ACAUAUUU  
||||| ||| |||||||||  
AACCAUU-AAACUGUAUUAAA 5'  
AT5G55620.1 563 582  
unknown protein

SRNA\_AG01\_SoLexa\_Mi2008\_6\_13612\_hit1  
5' GACAGAAGAAAGAGA-GCAC  
|| ||||||||||||| |||  
CU-UCUUCUUUCUCUUCGUU 5'  
AT5G55620.1 76 94  
unknown protein

SRNA\_AG01\_SoLexa\_Mi2008\_6\_35236\_hit1  
5' UGACAGAAGAAAGAGA-GCAC  
||| ||||||||||||| |||  
ACU-UCUUCUUUCUCUUCGUU 5'  
AT5G55620.1 76 95  
unknown protein

SRNA\_AG01\_SoLexa\_Mi2008\_1\_34109\_hit2  
5' UGAAAAGGUC-AGGGUUUAGA  
||||||| || |||||||||  
ACUUUUC-AGGUCCCAAUCG 5'  
AT5G55940.1 757 776  
unknown protein

SRNA\_AG01\_SoLexa\_Mi2008\_1\_53720\_hit1  
5' UUG-UGUUGUUGGGCUUGUU  
||| ||||||||||||| |||  
AACUACAACAACCCGAAGAA 5'  
AT5G56010.1 1084 1103  
heat shock protein 90

SRNA\_AG01\_SoLexa\_Mi2008\_1\_53720\_hit1  
5' UUG-UGUUGUUGGGCUUGUU  
||| ||||||||||||| |||  
AACUACAACAACCCGAAGAA 5'  
AT5G56030.1 1100 1119  
HEAT SHOCK PROTEIN 81-2 (HSP81-2) (sp|P55737)

SRNA\_AG01\_SoLexa\_Mi2008\_1\_35788\_hit1  
5' UGAGAAGAGCGGU-UCACAG-GG  
||||||||||||||| ||| |||  
ACUCUUCUCGCCAGAGUUUCUCC 5'  
AT5G56030.1 2029 2051  
HEAT SHOCK PROTEIN 81-2 (HSP81-2) (sp|P55737)

SRNA\_AG01\_SoLexa\_Mi2008\_1\_2\_hit38  
5' AAAA-AAAAAAA-AAAACCAU  
|||| ||||||| |||||||||  
UUUUCUUUUUUUCUUUUGGUA 5'  
AT5G56030.1 2268 2288  
HEAT SHOCK PROTEIN 81-2 (HSP81-2) (sp|P55737)

SRNA\_AG01\_SoLexa\_Mi2008\_1\_5366\_hit3  
5' CACAGUCAUAGAUAGUC-UCUG  
||||| ||||||||||||| |||

leaves\_1sup\_AG01\_SoLexa\_Mi\_Cell\_2008\_hit\_target\_site.txt

GUGUCCGUAUCUAUCAGCAGAG 5'  
AT5G56240.1 1894 1915  
unknown protein

SRNA\_AG01\_SoLexa\_Mi2008\_1\_39442\_hit1  
5' UGCUUAAAUGGAUGA-UUGGUU  
|||:||||||| ||| |  
ACGAGUUUACCUACUAAACCUA 5'  
AT5G56240.1 2853 2874  
unknown protein

SRNA\_AG01\_SoLexa\_Mi2008\_1\_52192\_hit1  
5' UUGGAUCAACAAACUGAUGG  
:||||||| ||| |  
GACCUAGUUGUUUGACU-CC 5'  
AT5G56240.1 3062 3080  
unknown protein

SRNA\_AG01\_SoLexa\_Mi2008\_6\_733\_hit1  
5' AACUGUU-CAUUAAGUAGAA  
||||| | ||||| |  
UUGACAAAG-AAUUCAUCUC 5'  
AT5G56240.1 3116 3134  
unknown protein

SRNA\_AG01\_SoLexa\_Mi2008\_1\_1800\_hit1  
5' AGAAGCAAGAGAUUGAGAGAG  
||||| ||||| ||||| |  
UCUUCUUUCUCUAAACUCUCUC 5'  
AT5G56240.1 79 99  
unknown protein

SRNA\_AG01\_SoLexa\_Mi2008\_3\_9236\_hit1  
5' CGGUAAUUGAUCUCAGGAAGCA  
|||| | ||||| ||||| ||  
GCCAAAACUAGAGUCCUU-GU 5'  
AT5G56350.1 1473 1492  
pyruvate kinase

SRNA\_AG01\_SoLexa\_Mi2008\_1\_45939\_hit1  
5' UG-UUGACACAUGAUCCAUGGA  
|| ||| ||||:||||||| |  
ACGAAC-GUGUAUUAGGUACCU 5'  
AT5G56870.1 733 753  
beta-galactosidase (emb|CAB64740.1)

SRNA\_AG01\_SoLexa\_Mi2008\_1\_37225\_hit4  
5' UGAUGAUGAUGAUGAUGAAGAAG  
||||||| ||||| |  
ACUACUACUACUAAUUCUUA 5'  
AT5G57655.2 72 94  
xylose isomerase

SRNA\_AG01\_SoLexa\_Mi2008\_1\_29234\_hit17  
5' UCCAACUUCAGAUGACUGGUC  
||||||| ||| |  
AGGUUGAAGUCU-C-GACCAG 5'  
AT5G57655.1 742 760  
xylose isomerase

SRNA\_AG01\_SoLexa\_Mi2008\_1\_48945\_hit17  
5' UUCAACUUCAGAUGACUGGUC  
||||||| | ||||| |

leaves\_1sup\_AG01\_SoLexa\_Mi\_Cell\_2008\_hit\_target\_site.txt

CAGGUUGAAGUCU-C-GACCAG 5'  
 AT5G57655.1 742 761  
 xylose isomerase

SRNA\_AG01\_SoLexa\_Mi2008\_9\_14254\_hit8  
 5' GAUGAUGAUGAUGAUGAUCUU  
 |||||  
 CUACUACUACUACUACUAAU 5'  
 AT5G57655.2 76 96  
 xylose isomerase

SRNA\_AG01\_SoLexa\_Mi2008\_1\_36323\_hit13  
 5' UGAGGAUGAUGAUGAUGAUGA  
 ||| |||||  
 ACUACUACUACUACUACUAAU 5'  
 AT5G57655.2 77 97  
 xylose isomerase

SRNA\_AG01\_SoLexa\_Mi2008\_1\_3079\_hit472  
 5' AUGAUGAUGAUGAUGAUGAUGA  
 |||||  
 CACUACUACUACUACUACUAAU 5'  
 AT5G57655.2 77 98  
 xylose isomerase

SRNA\_AG01\_SoLexa\_Mi2008\_1\_45039\_hit3  
 5' UGUGAUGAUGAUGAUGAUGAUGA  
 |||||  
 UCACUACUACUACUACUACUAAU 5'  
 AT5G57655.2 77 99  
 xylose isomerase

SRNA\_AG01\_SoLexa\_Mi2008\_1\_56092\_hit3  
 5' UUUGUGAUGAUGAUGAUGAUGA  
 | |||||  
 AUUCACUACUACUACUACUACU 5'  
 AT5G57655.2 80 101  
 xylose isomerase

SRNA\_AG01\_SoLexa\_Mi2008\_7\_3078\_hit1  
 5' AUGAUGAUGA-GAAUGAUGAU  
 ||||| || |||||  
 GACUACUACUACU-ACUACUA 5'  
 AT5G57655.2 80 99  
 xylose isomerase

SRNA\_AG01\_SoLexa\_Mi2008\_1\_36323\_hit13  
 5' UGAG-GAUGAUGAUGAUGAUGA  
 || |||||  
 UAUCACUACUACUACUACUACU 5'  
 AT5G57655.2 81 102  
 xylose isomerase

SRNA\_AG01\_SoLexa\_Mi2008\_1\_2280\_hit1  
 5' AGUGGAUGAUGAUGAUGAUGA  
 |||| |||||  
 UCAC-UACUACUACUACUAC 5'  
 AT5G57655.2 82 100  
 xylose isomerase

SRNA\_AG01\_SoLexa\_Mi2008\_1\_29234\_hit17  
 5' UCCAACUUCAGAUGACUGGUC  
 |||||

leaves\_1sup\_AG01\_SoLexa\_Mi\_Cell\_2008\_hit\_target\_site.txt

AGGUUGAAGUCU-C-GACCAG 5'  
 AT5G57655.2 858 876  
 xylose isomerase

SRNA\_AG01\_SoLexa\_Mi2008\_1\_48945\_hit17  
 5' UUCCAACUUCAGAUGACUGGUC  
 |||||:|||||  
 CAGGUUGAAGUCU-C-GACCAG 5'  
 AT5G57655.2 858 877  
 xylose isomerase

SRNA\_AG01\_SoLexa\_Mi2008\_2\_48112\_hit1  
 5' UUA-UA-UCGGGUUGAAUGGGU  
 ||| || |||||:|||||  
 AAUCAUUAGCCCAAUUUACCCA 5'  
 AT5G57900.1 1063 1085  
 unknown protein

SRNA\_AG01\_SoLexa\_Mi2008\_1\_47310\_hit1  
 5' UUAGAA-UGAGGUUGAUGAGUAUC  
 || ||| ||| |||||:|||||  
 AA-CUUUACUACAACUACUCAUAG 5'  
 AT5G57900.1 60 82  
 unknown protein

SRNA\_AG01\_SoLexa\_Mi2008\_1\_21349\_hit7  
 5' UAGAGGAAAGAGAGCAAUGAC  
 :|||||:|||||  
 GUCUCCUUUCUCUUCUUACUC 5'  
 AT5G57910.1 65 85  
 unknown protein

SRNA\_AG01\_SoLexa\_Mi2008\_1\_23549\_hit4  
 5' UAGGUUCAACAAACACGAGGAG  
 |||||:|||||  
 CUCCAAGUUGUUGGUG-UCCUC 5'  
 AT5G58210.1 1050 1070  
 unknown protein

SRNA\_AG01\_SoLexa\_Mi2008\_1\_37315\_hit1  
 5' UGAUGGAGGCAAGUGUGCAGG  
 |||||:||||| |||  
 ACUACCUCUGUUCACAC-UCC 5'  
 AT5G58210.3 647 666  
 unknown protein

SRNA\_AG01\_SoLexa\_Mi2008\_1\_37315\_hit1  
 5' UGAUGGAGGCAAGUGUGCAGG  
 |||||:||||| |||  
 ACUACCUCUGUUCACAC-UCC 5'  
 AT5G58210.2 672 691  
 unknown protein

SRNA\_AG01\_SoLexa\_Mi2008\_1\_37315\_hit1  
 5' UGAUGGAGGCAAGUGUGCAGG  
 |||||:||||| |||  
 ACUACCUCUGUUCACAC-UCC 5'  
 AT5G58210.4 691 710  
 unknown protein

SRNA\_AG01\_SoLexa\_Mi2008\_1\_37315\_hit1  
 5' UGAUGGAGGCAAGUGUGCAGG  
 |||||:||||| |||

leaves\_1sup\_AG01\_SoLexa\_Mi\_Cell\_2008\_hit\_target\_site.txt

ACUACCUCUGUUCACAC-UCC 5'  
AT5G58210.1 786 805  
unknown protein

SRNA\_AG01\_SoLexa\_Mi2008\_1\_23549\_hit4  
5' UAGGUUCAACAAACACGAGGAG  
|||||  
CUCCAAGUUGUUGGUG-UCCUC 5'  
AT5G58210.3 911 931  
unknown protein

SRNA\_AG01\_SoLexa\_Mi2008\_1\_23549\_hit4  
5' UAGGUUCAACAAACACGAGGAG  
|||||  
CUCCAAGUUGUUGGUG-UCCUC 5'  
AT5G58210.2 936 956  
unknown protein

SRNA\_AG01\_SoLexa\_Mi2008\_1\_23549\_hit4  
5' UAGGUUCAACAAACACGAGGAG  
|||||  
CUCCAAGUUGUUGGUG-UCCUC 5'  
AT5G58210.4 955 975  
unknown protein

SRNA\_AG01\_SoLexa\_Mi2008\_1\_40627\_hit1  
5' UGGAGGUGCCGAUGAUGCUAU  
||||| : |||||  
ACCUC-ACGGUUACUACGAUA 5'  
AT5G58350.1 1255 1274  
MAP kinase

SRNA\_AG01\_SoLexa\_Mi2008\_1\_13759\_hit1  
5' GACGAUGAUGAUGAUGACA  
|||||  
CUGCUACUACUAGUACUCC 5'  
AT5G58350.1 1916 1934  
MAP kinase

SRNA\_AG01\_SoLexa\_Mi2008\_5\_13760\_hit2  
5' GACGAUGAUGAUGAUGAGC  
|||||  
CUGCUACUACUAGUACUCC 5'  
AT5G58350.1 1916 1934  
MAP kinase

SRNA\_AG01\_SoLexa\_Mi2008\_1\_13759\_hit1  
5' GACGAUGAUGAUGAUGA-CA  
: ||||| : |||||  
UUGCUACUGCUACUACUAGU 5'  
AT5G58350.1 1922 1941  
MAP kinase

SRNA\_AG01\_SoLexa\_Mi2008\_1\_38921\_hit1  
5' UGCGG-ACGAUGAUGAUGAUGAU  
| : ||| ||||| : |||||  
AUGCCAUGCUACUGCUACUACUA 5'  
AT5G58350.1 1924 1946  
MAP kinase

SRNA\_AG01\_SoLexa\_Mi2008\_1\_40903\_hit2  
5' UGGAUGAUUUCACAGGAUUGU  
|||||

leaves\_1sup\_AG01\_SoLexa\_Mi\_Cell\_2008\_hit\_target\_site.txt

ACCUACUAAAGUGU--UAACA 5'  
AT5G58720.2 1624 1642  
putative PRL1 associated protein

SRNA\_AG01\_SoLexa\_Mi2008\_2\_18688\_hit10  
5' UAAUCCGCCACAAGUCCAUC  
||||| ||| |||||||||  
CUUAGG-GGUUUUCAAGGUAGG 5'  
AT5G58930.1 1430 1450  
unknown protein (At5g58930)

SRNA\_AG01\_SoLexa\_Mi2008\_1\_14852\_hit1  
5' GGAGAGACAGAGGCGUUGA  
||||||||||||||| ||  
CCUCUCUGUCUCCG-AAAG 5'  
AT5G59440.2 900 917  
thymidylate kinase - like protein

SRNA\_AG01\_SoLexa\_Mi2008\_1\_14852\_hit1  
5' GGAGAGACAGAGGCGUUGA  
||||||||||||||| ||  
CCUCUCUGUCUCCG-AAAG 5'  
AT5G59440.1 911 928  
thymidylate kinase - like protein

SRNA\_AG01\_SoLexa\_Mi2008\_1\_14852\_hit1  
5' GGAGAGACAGAGGCGUUGA  
||||||||||||||| ||  
CCUCUCUGUCUCCG-AAAG 5'  
AT5G59440.3 951 968  
thymidylate kinase - like protein

SRNA\_AG01\_SoLexa\_Mi2008\_2\_49343\_hit1  
5' UUCGCCGUCUUGUUCUAGUAAACC  
|| ||| ||||||| |||||||||  
AA-CGGAAGAACAACAUCAUUUGG 5'  
AT5G59500.1 1169 1191  
unknown protein

SRNA\_AG01\_SoLexa\_Mi2008\_2\_44392\_hit1  
5' UGU AUGGACCGUGGCAUGUCU  
|||| ||||| |||||||||  
ACAU-CCUGGAACCGUACAGA 5'  
AT5G60020.1 1227 1246  
laccase - like protein

SRNA\_AG01\_SoLexa\_Mi2008\_1\_54567\_hit1  
5' UUU AUCUGCAUCAAGAA-AAGA  
||||||| ||||||||| |||  
AAAUAGAGGUAGUUCUUGUUCG 5'  
AT5G60020.1 1741 1762  
laccase - like protein

SRNA\_AG01\_SoLexa\_Mi2008\_2\_52985\_hit50  
5' UUGGUCGU-UUUAGGUGGUUGA  
||||||| | ||||||||| |  
AACCAG-ACAAAUCCACCAAGU 5'  
AT5G60020.1 994 1014  
laccase - like protein

SRNA\_AG01\_SoLexa\_Mi2008\_4\_2943\_hit3  
5' AUCUUGAUGAUGCUGCAUC  
|||:|||||||||||

leaves\_1sup\_AG01\_SoLexa\_Mi\_Cell\_2008\_hit\_target\_site.txt

UAGGACUACUACGACGUAA 5'  
AT5G60120.1 1645 1663  
APETALA2 protein - like

SRNA\_AG01\_SoLexa\_Mi2008\_3\_1834\_hit2  
5' AGAAUCUUGAUGAUGCUGCAUC  
|||||:|||||  
UCUUAGGACUACUACGACGUAA 5'  
AT5G60120.1 1645 1666  
APETALA2 protein - like

SRNA\_AG01\_SoLexa\_Mi2008\_1\_1044\_hit2  
5' AAUCCUGAUGAUGCUGCAU  
|||||:|||||  
UUAGGACUACUACGACGUA 5'  
AT5G60120.1 1646 1664  
APETALA2 protein - like

SRNA\_AG01\_SoLexa\_Mi2008\_3\_1051\_hit2  
5' AAUCUUGAUGAUGCUGCAG  
||||:|||||  
UUAGGACUACUACGACGUA 5'  
AT5G60120.1 1646 1664  
APETALA2 protein - like

SRNA\_AG01\_SoLexa\_Mi2008\_54\_1052\_hit3  
5' AAUCUUGAUGAUGCUGCAU  
||||:|||||  
UUAGGACUACUACGACGUA 5'  
AT5G60120.1 1646 1664  
APETALA2 protein - like

SRNA\_AG01\_SoLexa\_Mi2008\_1\_13547\_hit1  
5' GAAUCCUGAUGAUGCUGCAG  
|||||:|||||  
CUUAGGACUACUACGACGUA 5'  
AT5G60120.1 1646 1665  
APETALA2 protein - like

SRNA\_AG01\_SoLexa\_Mi2008\_1\_13548\_hit2  
5' GAAUCCUGAUGAUGCUGCAU  
|||||:|||||  
CUUAGGACUACUACGACGUA 5'  
AT5G60120.1 1646 1665  
APETALA2 protein - like

SRNA\_AG01\_SoLexa\_Mi2008\_55\_13552\_hit2  
5' GAAUCUUGAUGAUGCUGCAG  
|||||:|||||  
CUUAGGACUACUACGACGUA 5'  
AT5G60120.1 1646 1665  
APETALA2 protein - like

SRNA\_AG01\_SoLexa\_Mi2008\_495\_13553\_hit3  
5' GAAUCUUGAUGAUGCUGCAU  
|||||:|||||  
CUUAGGACUACUACGACGUA 5'  
AT5G60120.1 1646 1665  
APETALA2 protein - like

SRNA\_AG01\_SoLexa\_Mi2008\_1\_1827\_hit1  
5' AGAAUCCUGAUGAUGCUGCAG  
|||||:|||||

leaves\_1sup\_AG01\_SoLexa\_Mi\_Cell\_2008\_hit\_target\_site.txt

UCUUAGGACUACUACGACGUA 5'  
AT5G60120.1 1646 1666  
APETALA2 protein - like

SRNA\_AG01\_SoLexa\_Mi2008\_13\_1828\_hit2  
5' AGAAUCCUGAUGAUGCUGCAU  
|||||||:|||||||  
UCUUAGGACUACUACGACGUA 5'  
AT5G60120.1 1646 1666  
APETALA2 protein - like

SRNA\_AG01\_SoLexa\_Mi2008\_834\_1831\_hit2  
5' AGAAUCUUGAUGAUGCUGCAG  
||||||:|||||||  
UCUUAGGACUACUACGACGUA 5'  
AT5G60120.1 1646 1666  
APETALA2 protein - like

SRNA\_AG01\_SoLexa\_Mi2008\_6188\_1833\_hit2  
5' AGAAUCUUGAUGAUGCUGCAU  
||||||:|||||||  
UCUUAGGACUACUACGACGUA 5'  
AT5G60120.1 1646 1666  
APETALA2 protein - like

SRNA\_AG01\_SoLexa\_Mi2008\_374\_14811\_hit1  
5' GGAAUCUUGAUGAUGCUGCAU  
:||||||:|||||||  
UCUUAGGACUACUACGACGUA 5'  
AT5G60120.1 1646 1666  
APETALA2 protein - like

SRNA\_AG01\_SoLexa\_Mi2008\_4\_13922\_hit2  
5' GAGAAUCUUGAUGAUGCUGCAG  
||||||:|||||||  
CUCUUAGGACUACUACGACGUA 5'  
AT5G60120.1 1646 1667  
APETALA2 protein - like

SRNA\_AG01\_SoLexa\_Mi2008\_25\_13923\_hit2  
5' GAGAAUCUUGAUGAUGCUGCAU  
||||||:|||||||  
CUCUUAGGACUACUACGACGUA 5'  
AT5G60120.1 1646 1667  
APETALA2 protein - like

SRNA\_AG01\_SoLexa\_Mi2008\_1\_15149\_hit1  
5' GGGAAUCUUGAUGAUGCUGCAU  
|:||||||:|||||||  
CUCUUAGGACUACUACGACGUA 5'  
AT5G60120.1 1646 1667  
APETALA2 protein - like

SRNA\_AG01\_SoLexa\_Mi2008\_117\_13551\_hit5  
5' GAAUCUUGAUGAUGCUGCA  
||||||:|||||||  
CUUAGGACUACUACGACGU 5'  
AT5G60120.1 1647 1665  
APETALA2 protein - like

SRNA\_AG01\_SoLexa\_Mi2008\_8\_1826\_hit3  
5' AGAAUCCUGAUGAUGCUGCA  
|||||||

leaves\_1sup\_AG01\_Solexa\_Mi\_Cell\_2008\_hit\_target\_site.txt

UCUUAGGACUACUACGACGU 5'  
AT5G60120.1 1647 1666  
APETALA2 protein - like

SRNA\_AG01\_Solexa\_Mi2008\_2484\_1830\_hit4  
5' AGAAUCUUGAUGAUGCUGCA  
|||||||:|||||||  
UCUUAGGACUACUACGACGU 5'  
AT5G60120.1 1647 1666  
APETALA2 protein - like

SRNA\_AG01\_Solexa\_Mi2008\_1\_14807\_hit1  
5' GGAAUCCUGAUGAUGCUGCA  
:|||||||:|||||||  
UCUUAGGACUACUACGACGU 5'  
AT5G60120.1 1647 1666  
APETALA2 protein - like

SRNA\_AG01\_Solexa\_Mi2008\_102\_14810\_hit1  
5' GGAAUCUUGAUGAUGCUGCA  
:|||||||:|||||||  
UCUUAGGACUACUACGACGU 5'  
AT5G60120.1 1647 1666  
APETALA2 protein - like

SRNA\_AG01\_Solexa\_Mi2008\_2\_13921\_hit4  
5' GAGAAUCUUGAUGAUGCUGCA  
|||||||:|||||||  
CUCUUAGGACUACUACGACGU 5'  
AT5G60120.1 1647 1667  
APETALA2 protein - like

SRNA\_AG01\_Solexa\_Mi2008\_25\_1829\_hit4  
5' AGAAUCUUGAUGAUGCUGC  
|||||||:|||||||  
UCUUAGGACUACUACGACG 5'  
AT5G60120.1 1648 1666  
APETALA2 protein - like

SRNA\_AG01\_Solexa\_Mi2008\_3\_14809\_hit1  
5' GGAAUCUUGAUGAUGCUGC  
:|||||||:|||||||  
UCUUAGGACUACUACGACG 5'  
AT5G60120.1 1648 1666  
APETALA2 protein - like

SRNA\_AG01\_Solexa\_Mi2008\_1\_13920\_hit4  
5' GAGAAUCUUGAUGAUGCUGC  
|||||||:|||||||  
CUCUUAGGACUACUACGACG 5'  
AT5G60120.1 1648 1667  
APETALA2 protein - like

SRNA\_AG01\_Solexa\_Mi2008\_1\_35822\_hit4  
5' UGAGAAUCUUGAUGAUGCUGC  
|||||||:|||||||  
ACUCUUAGGACUACUACGACG 5'  
AT5G60120.1 1648 1668  
APETALA2 protein - like

SRNA\_AG01\_Solexa\_Mi2008\_1\_5081\_hit1  
5' CAAUAACGAAAUUGAUGUCAG  
|||||||

leaves\_1sup\_AG01\_SoLexa\_Mi\_Cell\_2008\_hit\_target\_site.txt

GUUAUUGCUUUAACUACAGUC 5'  
AT5G60120.1 998 1018  
APETALA2 protein - like

SRNA\_AG01\_SoLexa\_Mi2008\_8\_34422\_hit1  
5' UGAAC-CUUGGAAGAAAACUUU  
||||| ||||||||| ||||  
ACUUGAGAACCUUCUUUCGAAA 5'  
AT5G60160.1 1478 1499  
aspartyl aminopeptidase - like protein

SRNA\_AG01\_SoLexa\_Mi2008\_1\_27291\_hit3  
5' UCAAGGUUGGUGGACCUCUCA  
||||||||||| |||||||||  
AGUCCAACCAACUGGAGAGU 5'  
AT5G60390.3 664 684  
translation elongation factor eEF-1 alpha chain (gene A4)

SRNA\_AG01\_SoLexa\_Mi2008\_1\_27291\_hit3  
5' UCAAGGUUGGUGGACCUCUCA  
||||||||||| |||||||||  
AGUCCAACCAACUGGAGAGU 5'  
AT5G60390.2 674 694  
translation elongation factor eEF-1 alpha chain (gene A4)

SRNA\_AG01\_SoLexa\_Mi2008\_7\_12746\_hit1  
5' CUUGACCUUGUAAGACCCC  
|||||||||||:|||||||  
GAACUGGAACGUUCUGGAA 5'  
AT5G60450.1 1873 1891  
auxin response factor 4

SRNA\_AG01\_SoLexa\_Mi2008\_7\_49852\_hit1  
5' UUCUUGACCUUGUAAGACCCC  
|||||||||||:|||||||  
AAGAACUGGAACGUUCUGGAA 5'  
AT5G60450.1 1873 1893  
auxin response factor 4

SRNA\_AG01\_SoLexa\_Mi2008\_4\_55012\_hit1  
5' UUUCUUGACCUUGUAAGACCCC  
|||||||||||:|||||||  
AAAGAACUGGAACGUUCUGGAA 5'  
AT5G60450.1 1873 1894  
auxin response factor 4

SRNA\_AG01\_SoLexa\_Mi2008\_1\_55011\_hit1  
5' UUUCUUGACCUUGUAAGACCC  
|||||||||||:|||||||  
AAAGAACUGGAACGUUCUGGA 5'  
AT5G60450.1 1874 1894  
auxin response factor 4

SRNA\_AG01\_SoLexa\_Mi2008\_19\_29991\_hit1  
5' UCCGGCGGUUCAUAACAUCAA  
||||||||||| |||||||||  
AGGCCGCCAAGUAUUGUAGUU 5'  
AT5G60450.1 1925 1945  
auxin response factor 4

SRNA\_AG01\_SoLexa\_Mi2008\_2\_24987\_hit1  
5' UAUCGGCGGUUCAUAACAUC  
||||||||||| |||||||||

leaves\_1sup\_AG01\_SoLexa\_Mi\_Cell\_2008\_hit\_target\_site.txt

AUAGGCCGCCAAGUUAUUGUAG 5'  
AT5G60450.1 1927 1947  
auxin response factor 4

SRNA\_AG01\_SoLexa\_Mi2008\_8\_4564\_hit1  
5' CAAGAACUGGAUUUGCAUGAGA  
|||||  
GUUCUUGACCUAAACGUACUCU 5'  
AT5G60450.1 1966 1987  
auxin response factor 4

SRNA\_AG01\_SoLexa\_Mi2008\_7\_4563\_hit1  
5' CAAGAACUGGAUUUGCAUGAG  
|||||  
GUUCUUGACCUAAACGUACUC 5'  
AT5G60450.1 1967 1987  
auxin response factor 4

SRNA\_AG01\_SoLexa\_Mi2008\_1\_34330\_hit1  
5' UGAACAAGCUGGGUUCACGCC  
|||||  
ACUUGUUCGACCCAAGUGCGG 5'  
AT5G60450.1 2035 2055  
auxin response factor 4

SRNA\_AG01\_SoLexa\_Mi2008\_7\_33918\_hit1  
5' UCUUGACCUUGUAAGACCCCA  
|||||:|||||  
AGAACUGGAACGUUCUGGGAA 5'  
AT5G60450.1 2082 2102  
auxin response factor 4

SRNA\_AG01\_SoLexa\_Mi2008\_7\_49853\_hit1  
5' UUCUUGACCUUGUAAGACCCCA  
|||||:|||||  
AAGAACUGGAACGUUCUGGGAA 5'  
AT5G60450.1 2082 2103  
auxin response factor 4

SRNA\_AG01\_SoLexa\_Mi2008\_7\_12746\_hit1  
5' CUUGACCUUGUAAGACCCC  
|||||:|||||  
GAACUGGAACGUUCUGGGA 5'  
AT5G60450.1 2083 2101  
auxin response factor 4

SRNA\_AG01\_SoLexa\_Mi2008\_7\_49852\_hit1  
5' UUCUUGACCUUGUAAGACCCC  
|||||:|||||  
AAGAACUGGAACGUUCUGGGA 5'  
AT5G60450.1 2083 2103  
auxin response factor 4

SRNA\_AG01\_SoLexa\_Mi2008\_4\_55012\_hit1  
5' UUUCUUGACCUUGUAAGACCCC  
|||||:|||||  
AAAGAACUGGAACGUUCUGGGA 5'  
AT5G60450.1 2083 2104  
auxin response factor 4

SRNA\_AG01\_SoLexa\_Mi2008\_1\_55011\_hit1  
5' UUUCUUGACCUUGUAAGACCC  
|||||:|||||

leaves\_1sup\_AG01\_SoLexa\_Mi\_Cell\_2008\_hit\_target\_site.txt

AAAGAACUGGAACGUUCUGGG 5'  
AT5G60450.1 2084 2104  
auxin response factor 4

SRNA\_AG01\_SoLexa\_Mi2008\_2\_34797\_hit1  
5' UGAAGGGGGACCCGAGGAUUG  
|||||  
ACUCCCCCUGGGCUCCUAAC 5'  
AT5G60450.1 2266 2286  
auxin response factor 4

SRNA\_AG01\_SoLexa\_Mi2008\_1\_7242\_hit1  
5' CAUGGAGAAGAAGAAUGA-GGU  
||||:||||| || |||  
GUACUUCUUCUUCU-CUACCA 5'  
AT5G60450.1 625 645  
auxin response factor 4

SRNA\_AG01\_SoLexa\_Mi2008\_1\_25289\_hit1  
5' UAUGACGAUGAUGAUGACGGA  
:||||| |||  
GUACUGCUACUACUA-GGCCU 5'  
AT5G60450.1 650 669  
auxin response factor 4

SRNA\_AG01\_SoLexa\_Mi2008\_9\_14254\_hit8  
5' GAUGAUGAUGAUGAUGAUCUU  
|||||:|||||:  
CUACUACUGCUACUACUAGGC 5'  
AT5G60450.1 651 671  
auxin response factor 4

SRNA\_AG01\_SoLexa\_Mi2008\_7\_3078\_hit1  
5' AUGAUGAUGA-GAAUGAUGAU  
||||| || |||  
AACUACUACUGCU-ACUACUA 5'  
AT5G60450.1 655 674  
auxin response factor 4

SRNA\_AG01\_SoLexa\_Mi2008\_1\_45039\_hit3  
5' UGU-GAUGAUGAUGAUGAUGAUGA  
||| || |||:|||||  
ACAUCUUCUACUACUGCUACUACU 5'  
AT5G60450.1 656 679  
auxin response factor 4

SRNA\_AG01\_SoLexa\_Mi2008\_1\_10092\_hit1  
5' CUAGAAGAUGAUGACGAUUGA  
||||| |||  
GAUCUUCUACUACUGCUA-CU 5'  
AT5G60450.1 659 678  
auxin response factor 4

SRNA\_AG01\_SoLexa\_Mi2008\_3\_35894\_hit1  
5' UGAGAGCAGAGAAAGAGAGU  
||||| |||  
ACUCUC-UCUCUUCUCUCC 5'  
AT5G60450.1 67 85  
auxin response factor 4

SRNA\_AG01\_SoLexa\_Mi2008\_1\_11311\_hit1  
5' CUGAAAAAAAAAAGAGAGGG  
|| |||

leaves\_1sup\_AG01\_SoLexa\_Mi\_Cell\_2008\_hit\_target\_site.txt

GA-UUUUUUUUCUCUCCA 5'  
 AT5G60850.1 1218 1235  
 zinc finger protein OBP4 - like

SRNA\_AG01\_SoLexa\_Mi2008\_1\_1776\_hit10  
 5' AGAAAAAAAAAAAAAAAAAAU  
 ||||||||||||||||  
 GGUUUUUUUUUUUUUUUUUC 5'  
 AT5G61020.2 1673 1693  
 unknown protein

SRNA\_AG01\_SoLexa\_Mi2008\_1\_3\_hit25  
 5' AAAAAAAAAAAAAAGAAAGA  
 |||||||||||| |||:  
 UUUUUUUUUUUU-UUUUC 5'  
 AT5G61020.2 1674 1691  
 unknown protein

SRNA\_AG01\_SoLexa\_Mi2008\_1\_3\_hit25  
 5' AAAAAAAAAAAAAAGAAAGA  
 |||||||||||| |||:  
 UUUUUUUUUUUU-UUUUU 5'  
 AT5G61020.2 1675 1692  
 unknown protein

SRNA\_AG01\_SoLexa\_Mi2008\_1\_1776\_hit10  
 5' AGAAAAAAAAAAAAAAAAAAU  
 ||||||||||||||||  
 GGUUUUUUUUUUUUUUUUUC 5'  
 AT5G61020.1 1678 1698  
 unknown protein

SRNA\_AG01\_SoLexa\_Mi2008\_1\_3\_hit25  
 5' AAAAAAAAAAAAAAGAAAGA  
 |||||||||||| |||:  
 UUUUUUUUUUUU-UUUUC 5'  
 AT5G61020.1 1679 1696  
 unknown protein

SRNA\_AG01\_SoLexa\_Mi2008\_1\_3\_hit25  
 5' AAAAAAAAAAAAAAGAAAGA  
 |||||||||||| |||:  
 UUUUUUUUUUUU-UUUUU 5'  
 AT5G61020.1 1680 1697  
 unknown protein

SRNA\_AG01\_SoLexa\_Mi2008\_1\_352\_hit1  
 5' AAAGAAGAAGAU-AAAGGA  
 ||||||| | |||||  
 GUUCUUCUUCU-UCUUCCU 5'  
 AT5G61210.1 107 125  
 snap25a

SRNA\_AG01\_SoLexa\_Mi2008\_14\_6261\_hit1  
 5' CAGCAGGUAGUCCUCAUAGAU  
 ||| |||||||||| ||||  
 GUC-UCCAUCAGGAGAAUCUU 5'  
 AT5G61210.1 427 446  
 snap25a

SRNA\_AG01\_SoLexa\_Mi2008\_3\_39824\_hit1  
 5' UGGAUUACUUGAAC-UACCAUCU  
 ||||||| || |

leaves\_1sup\_AG01\_Solexa\_Mi\_Cell\_2008\_hit\_target\_site.txt

ACCUUAUGA-CUUUUAUGGUAGA 5'  
AT5G61600.1 719 740  
DNA binding protein - like

SRNA\_AG01\_Solexa\_Mi2008\_1\_50782\_hit1  
5' UUGAGGGUUGGAAUAG-ACA-UGG  
|||||  
AACUCCAACCGUAUCAUGUAACC 5'  
AT5G61620.1 739 762  
transcriptional activator - like protein

SRNA\_AG01\_Solexa\_Mi2008\_8\_50781\_hit1  
5' UUGAGGGUUGGAAUAG-ACAUG  
|||||  
AACUCCAACCGUAUCAUGUAA 5'  
AT5G61620.1 741 762  
transcriptional activator - like protein

SRNA\_AG01\_Solexa\_Mi2008\_15\_12780\_hit1  
5' CUUGAGGGUUGGAAUAG-ACA  
|||||  
GAACUCCAACCGUAUCAUGU 5'  
AT5G61620.1 743 763  
transcriptional activator - like protein

SRNA\_AG01\_Solexa\_Mi2008\_1\_33924\_hit1  
5' UCUUGAGGGUUGGAAUAG-ACA  
|||||  
AGAACUCCAACCGUAUCAUGU 5'  
AT5G61620.1 743 764  
transcriptional activator - like protein

SRNA\_AG01\_Solexa\_Mi2008\_2\_5441\_hit1  
5' CACCACCACCAGCGCCGC  
|||||  
GUGGUGGUGGUGGUGGCGGUG 5'  
AT5G61660.1 399 419  
unknown protein

SRNA\_AG01\_Solexa\_Mi2008\_1\_7688\_hit1  
5' CCACCACCACCAGCGCCAC  
|||||  
GGUGGUGGUGGUGGUGGCGGUG 5'  
AT5G61660.1 399 420  
unknown protein

SRNA\_AG01\_Solexa\_Mi2008\_1\_1510\_hit1  
5' ACCACCACCAGCGCCGC  
|||||  
UGGUGGUGGUGGUGGUGGCGG 5'  
AT5G61660.1 401 421  
unknown protein

SRNA\_AG01\_Solexa\_Mi2008\_8\_13469\_hit2  
5' GAAGAUUCAGGAGAAUGAU  
|||||  
CUUCUAAGUCUUCUUUACUA 5'  
AT5G61900.3 3 23  
copine - like protein

SRNA\_AG01\_Solexa\_Mi2008\_7\_33918\_hit1  
5' UCUUGACCUUGUAAGACCCCA  
|||||

leaves\_1sup\_AG01\_SoLexa\_Mi\_Cell\_2008\_hit\_target\_site.txt

AGAACUGGAACGUUCUGGGAA 5'  
AT5G62000.3 1709 1729  
auxin response factor - like protein

SRNA\_AG01\_SoLexa\_Mi2008\_7\_49853\_hit1  
5' UUCUUGACCUUGUAAGACCCCA  
|||||||:|||||||  
AAGAACUGGAACGUUCUGGGAA 5'  
AT5G62000.3 1709 1730  
auxin response factor - like protein

SRNA\_AG01\_SoLexa\_Mi2008\_7\_12746\_hit1  
5' CUUGACCUUGUAAGACCCCA  
|||||||:|||||||  
GAACUGGAACGUUCUGGGAA 5'  
AT5G62000.3 1710 1728  
auxin response factor - like protein

SRNA\_AG01\_SoLexa\_Mi2008\_7\_49852\_hit1  
5' UUCUUGACCUUGUAAGACCCCA  
|||||||:|||||||  
AAGAACUGGAACGUUCUGGGAA 5'  
AT5G62000.3 1710 1730  
auxin response factor - like protein

SRNA\_AG01\_SoLexa\_Mi2008\_4\_55012\_hit1  
5' UUUCUUGACCUUGUAAGACCCCA  
|||||||:|||||||  
UAAGAACUGGAACGUUCUGGGAA 5'  
AT5G62000.3 1710 1731  
auxin response factor - like protein

SRNA\_AG01\_SoLexa\_Mi2008\_1\_55011\_hit1  
5' UUUCUUGACCUUGUAAGACCCCA  
|||||||:|||||||  
UAAGAACUGGAACGUUCUGGGAA 5'  
AT5G62000.3 1711 1731  
auxin response factor - like protein

SRNA\_AG01\_SoLexa\_Mi2008\_7\_33918\_hit1  
5' UCUUGACCUUGUAAGACCCCA  
|||||||:|||||||  
AGAACUGGAACGUUCUGGGAA 5'  
AT5G62000.1 1835 1855  
auxin response factor - like protein

SRNA\_AG01\_SoLexa\_Mi2008\_7\_49853\_hit1  
5' UUCUUGACCUUGUAAGACCCCA  
|||||||:|||||||  
AAGAACUGGAACGUUCUGGGAA 5'  
AT5G62000.1 1835 1856  
auxin response factor - like protein

SRNA\_AG01\_SoLexa\_Mi2008\_7\_12746\_hit1  
5' CUUGACCUUGUAAGACCCCA  
|||||||:|||||||  
GAACUGGAACGUUCUGGGAA 5'  
AT5G62000.1 1836 1854  
auxin response factor - like protein

SRNA\_AG01\_SoLexa\_Mi2008\_7\_49852\_hit1  
5' UUCUUGACCUUGUAAGACCCCA  
|||||||:|||||||

leaves\_1sup\_AG01\_SoLexa\_Mi\_Cell\_2008\_hit\_target\_site.txt

AAGAACUGGAACGUUCUGGGA 5'  
AT5G62000.1 1836 1856  
auxin response factor - like protein

SRNA\_AG01\_SoLexa\_Mi2008\_4\_55012\_hit1  
5' UUUCUUGACCUUGUAAGACCCC  
|||||||:|||||||  
UAAGAACUGGAACGUUCUGGGA 5'  
AT5G62000.1 1836 1857  
auxin response factor - like protein

SRNA\_AG01\_SoLexa\_Mi2008\_1\_55011\_hit1  
5' UUUCUUGACCUUGUAAGACCCC  
|||||||:|||||||  
UAAGAACUGGAACGUUCUGGG 5'  
AT5G62000.1 1837 1857  
auxin response factor - like protein

SRNA\_AG01\_SoLexa\_Mi2008\_1\_7208\_hit1  
5' CAUGCCUCAAACUCCCAACUUG  
||| ||||| |||||:  
GUA-GGAGUUGCGGGUUGAAU 5'  
AT5G62190.1 343 362  
putative RNA helicase (MMI9.2)

SRNA\_AG01\_SoLexa\_Mi2008\_10\_35767\_hit2  
5' UGAGAAAGAUAGAGA-UCACA  
:||||||| ||| |  
GCUCUUUCUACUCUUAGUCU 5'  
AT5G62530.1 99 118  
delta-1-pyrroline-5-carboxylate dehydrogenase precursor (P5CDH)

SRNA\_AG01\_SoLexa\_Mi2008\_1\_34628\_hit3  
5' UGAAGAUGGAACCAGCGAAA  
:||||||| |||||  
UUUUCUACCUAGGUCGCUUU 5'  
AT5G62680.1 1674 1693  
peptide transporter

SRNA\_AG01\_SoLexa\_Mi2008\_1\_9527\_hit1  
5' CAAAAGGCGUUAUGAUGGUU  
|||||||  
GAUUUCCGCAAUUACUACCAA 5'  
AT5G62680.1 381 401  
peptide transporter

SRNA\_AG01\_SoLexa\_Mi2008\_1\_3006\_hit1  
5' AUGACGUUAAGGGCCAAUGGUA  
|||||||  
UACUGCAAUCCCGGUUACCAU 5'  
AT5G63020.1 1045 1066  
NBS/LRR disease resistance like protein

SRNA\_AG01\_SoLexa\_Mi2008\_5\_14408\_hit1  
5' GCAAGAGU-UCCAUAGUAGCAA  
:|||| | |||||  
UGUUCUGACAGGUAUCAUCGUU 5'  
AT5G63020.1 2096 2117  
NBS/LRR disease resistance like protein

SRNA\_AG01\_SoLexa\_Mi2008\_1\_6562\_hit1  
5' CAGGGGACCCCGGUGGAUGUG  
|||||||

leaves\_1sup\_AG01\_SoLexa\_Mi\_Cell\_2008\_hit\_target\_site.txt

GUCCCCUGGGCCACCUACAC 5'  
AT5G63020.1 2421 2441  
NBS/LRR disease resistance like protein

SRNA\_AG01\_SoLexa\_Mi2008\_1\_4416\_hit1  
5' CAACCCACAUCACAAUAUCA  
||| ||| ||||| ||||| |||||  
GUUAGGUUUAGUGUUUAUAGUU 5'  
AT5G63020.1 613 633  
NBS/LRR disease resistance like protein

SRNA\_AG01\_SoLexa\_Mi2008\_3\_13626\_hit2  
5' GACAGACUGA-GAGCUCUUU  
||||||| || ||||| |||||  
CUGUCUG-CUUCUCGAGAAA 5'  
AT5G63600.2 1460 1478  
1-aminocyclopropane-1-carboxylic acid oxidase-like protein

SRNA\_AG01\_SoLexa\_Mi2008\_5\_36780\_hit5  
5' UGAGUCUUUGGCUUUGUUUC  
|| | ||||| ||||| |||||  
AC-C-GAAACCGAAACAAAC 5'  
AT5G63680.1 1294 1311  
pyruvate kinase

SRNA\_AG01\_SoLexa\_Mi2008\_1\_166\_hit3  
5' AAAAGAAACAGAAGAGAAUGCU  
||||||| ||||| |||||:  
UUUUCUUUCUCUUCU-UUACGG 5'  
AT5G63680.1 1761 1781  
pyruvate kinase

SRNA\_AG01\_SoLexa\_Mi2008\_6\_10055\_hit66  
5' CUACUGUUGUUUACUGC-AUCUU  
||||||| ||||| |||||  
GAUGACAACAAAU-ACGAUAGAA 5'  
AT5G63920.1 2570 2591  
DNA topoisomerase III

SRNA\_AG01\_SoLexa\_Mi2008\_1\_355\_hit2  
5' AAAGAAGAGAACAAUUAU  
||||||| || |||||  
UUUCUUCUCUU-UUUUUUA 5'  
AT5G64310.1 563 580  
arabinogalactan-protein AGP1 (gb|AAC77823.1)

SRNA\_AG01\_SoLexa\_Mi2008\_1\_340\_hit1  
5' AAAGAAAAUGA-UCAAAGU  
||||||| | |||||  
UUUCUUUUUA-UAAGUUUCU 5'  
AT5G64310.1 590 608  
arabinogalactan-protein AGP1 (gb|AAC77823.1)

SRNA\_AG01\_SoLexa\_Mi2008\_1\_18966\_hit2  
5' UAAUUGUUGUUGUGUAUGGA  
||||||| |||||  
UUUAACAACAACACA-ACCU 5'  
AT5G64620.1 114 132  
invertase inhibitor homolog (emb|CAA73335.1)

SRNA\_AG01\_SoLexa\_Mi2008\_1\_351\_hit2  
5' AAAGAA-GAAAAACAGAUCU  
||||| ||||| ||||| |

leaves\_1sup\_AG01\_SoLexa\_Mi\_Cell\_2008\_hit\_target\_site.txt

UUUCUUUCUUUUUGUCUAAA 5'  
 AT5G65020.1 1178 1197  
 annexin

SRNA\_AG01\_SoLexa\_Mi2008\_2\_46703\_hit1  
 5' UUAUCAAGGUCGUACAUUGC  
 |||:|||||  
 AAUUAGUCCAUCUGUAAUU 5'  
 AT5G65310.2 37 57  
 homeobox-leucine zipper protein ATHB-5 (HD-zip protein ATHB-5) (sp|P46667)

SRNA\_AG01\_SoLexa\_Mi2008\_1\_20899\_hit1  
 5' UAGAAGAUAGAGAAUGAUGGA  
 :|||:|||||  
 GUCUUCUCUCUUACU-CCU 5'  
 AT5G67070.1 126 145  
 unknown protein

SRNA\_AG01\_SoLexa\_Mi2008\_1\_35784\_hit2  
 5' UGAGAAGAGAUAGAAU-AGA  
 |||:|||||  
 ACUCUUCUCUCUUACUCC 5'  
 AT5G67070.1 127 146  
 unknown protein

SRNA\_AG01\_SoLexa\_Mi2008\_3\_768\_hit1  
 5' AAGAAGAGAGAAUUGAG  
 |||:|||||  
 GUCUUCUCUCUU-ACUC 5'  
 AT5G67070.1 128 145  
 unknown protein

SRNA\_AG01\_SoLexa\_Mi2008\_1\_43909\_hit1  
 5' UGUAAAGAGGUGAUUGGGUU  
 |||:|||||  
 ACAUUUCUCCACUAACCCCAA 5'  
 AT5G67070.1 4 24  
 unknown protein

SRNA\_AG01\_SoLexa\_Mi2008\_7\_12746\_hit1  
 5' CUUGACCUUGUAAG-ACCCC  
 |||:|||||  
 GAAGUGGAACAUUCUUGGGU 5'  
 AT5G67370.1 703 722  
 putative protein

SRNA\_AG01\_SoLexa\_Mi2008\_1\_431\_hit1  
 5' AAAGAUUGAUGAUAAUGAA  
 |||:|||||  
 GCUCUACUACUACUACUU 5'  
 AT5G67580.2 1449 1467  
 telomere repeat binding factor 2 (TRB2)

SRNA\_AG01\_SoLexa\_Mi2008\_2\_52774\_hit1  
 5' UUGGGUCUAGAAGAAUUC-AGC  
 |||:|||||  
 AACCCAGAUCUUCUUGAGCUCU 5'  
 AT5G67580.2 1464 1485  
 telomere repeat binding factor 2 (TRB2)

SRNA\_AG01\_SoLexa\_Mi2008\_1\_431\_hit1  
 5' AAAGAUUGAUGAUAAUGAA  
 |||:|||||

leaves\_1sup\_AG01\_Solexa\_Mi\_Cell\_2008\_hit\_target\_site.txt

GCUCUAACUACUACUACUU 5'  
AT5G67580.1 1591 1609  
telomere repeat binding factor 2 (TRB2)

SRNA\_AG01\_Solexa\_Mi2008\_2\_52774\_hit1  
5' UUGGGUCUAGAAGAAUUC-AGC  
|||||: ||  
AACCCAGAUCUUCUUGAGCUCU 5'  
AT5G67580.1 1606 1627  
telomere repeat binding factor 2 (TRB2)

SRNA\_AG01\_Solexa\_Mi2008\_1\_50655\_hit1  
5' UUGAGGAGCGUUCUGGUCUUG  
||||| ||| |||||  
AACUCCUCGGAAGA-CAGAAC 5'  
AT5G67580.2 699 718  
telomere repeat binding factor 2 (TRB2)

SRNA\_AG01\_Solexa\_Mi2008\_1\_50655\_hit1  
5' UUGAGGAGCGUUCUGGUCUUG  
||||| ||| |||||  
AACUCCUCGGAAGA-CAGAAC 5'  
AT5G67580.1 841 860  
telomere repeat binding factor 2 (TRB2)

flowers\_1sup\_AG01\_SoLexa\_Mi\_Cell\_2008\_hit\_target\_site.txt

SRNA\_AG01\_SoLexa\_Mi2008\_2\_19092\_hit1

5' UACAACAGGAAGGUCGAUGGUU  
|||||  
AUGUUGUCCUCCAGCUACCAA 5'  
AT1G01470.1 487 508  
unknown protein

SRNA\_AG01\_SoLexa\_Mi2008\_3\_768\_hit1

5' AAGA-AGAGAGAGAAUUGAG  
||| |||||  
GUCUCUCUCUCUUUACUC 5'  
AT1G01490.1 191 210  
unknown protein

SRNA\_AG01\_SoLexa\_Mi2008\_2\_13419\_hit2

5' GAAGAAGAAGAAGACACUU  
||||| :  
CUUCUUCUUCUUCUGUUCG 5'  
AT1G04310.1 206 224  
putative ethylene receptor ERS2

SRNA\_AG01\_SoLexa\_Mi2008\_1\_13420\_hit2

5' GAAGAAGAAGAAGACUCUU  
||||| |||  
CUUCUUCUUCUUC--AGAU 5'  
AT1G04310.1 90 106  
putative ethylene receptor ERS2

SRNA\_AG01\_SoLexa\_Mi2008\_1\_49223\_hit1

5' UUCGAGAUCCAGGUACACCGGA  
||||| ||| |||  
CAGCUCUAGUCCUGUAGCCU 5'  
AT1G05010.1 463 483  
1-aminocyclopropane-1-carboxylate oxidase

SRNA\_AG01\_SoLexa\_Mi2008\_3\_36293\_hit2

5' UGAGGAGGAAGAUGG-UUUGGAU  
||||| ||| ||||| :  
ACUCCUCCUCCACCAAACCU 5'  
AT1G06620.1 169 191  
oxidoreductase-like protein

SRNA\_AG01\_SoLexa\_Mi2008\_2\_36292\_hit2

5' UGAGGAGGAAGAUGG-UUUGGA  
||||| ||| |||||  
ACUCCUCCUCCACCAAACCU 5'  
AT1G06620.1 170 191  
oxidoreductase-like protein

SRNA\_AG01\_SoLexa\_Mi2008\_18\_6978\_hit1

5' CAUCAACUUC-AGGAUUCGCCA  
||| ||| | |||||  
GUAUUUGA-GCUCCUAAGCGGU 5'  
AT1G06620.1 964 984  
oxidoreductase-like protein

SRNA\_AG01\_SoLexa\_Mi2008\_23\_8104\_hit1

5' CCGUGAGCCAUCUCU-UAGAUCU  
||||| ||||| | |||||  
GGCACUCGUUAGAGACA-CUAGA 5'  
AT1G07240.1 1091 1112  
unknown protein

flowers\_1sup\_AG01\_SoLexa\_Mi\_Cell\_2008\_hit\_target\_site.txt

SRNA\_AG01\_SoLexa\_Mi2008\_2\_45261\_hit1

5' UGUGGACCAAGAUUCCAGUUG  
||||| ||||||||| |||  
ACACCCGGUUCUAUAGGUGAAC 5'  
AT1G07240.1 1248 1269  
unknown protein

SRNA\_AG01\_SoLexa\_Mi2008\_1\_34289\_hit2

5' UGAAAUCGAUGUUGUAAGUCC  
||||||| | |||||||  
ACUUUAGCUCCUACAUUCAGA 5'  
AT1G07240.1 454 474  
unknown protein

SRNA\_AG01\_SoLexa\_Mi2008\_9\_14254\_hit8

5' GAUGAUGAUGAUGAUGAUCUU  
||||||| || ||  
CUACUACUACUACU-CU-GAU 5'  
AT1G07240.1 518 536  
unknown protein

SRNA\_AG01\_SoLexa\_Mi2008\_1\_7931\_hit2

5' CCCGAUGAUGAUGAUGAGAC  
||||||| |||||||  
CUUCUACUACUACUCUG 5'  
AT1G07240.1 519 538  
unknown protein

SRNA\_AG01\_SoLexa\_Mi2008\_1\_34723\_hit1

5' UGAAGGAAGGUUACCUAACGGCC  
||||||| ||||| |||||  
CCUCCUCCAAAUGGAGUCCGG 5'  
AT1G07240.1 606 629  
unknown protein

SRNA\_AG01\_SoLexa\_Mi2008\_1\_53805\_hit1

5' UUGUUGGUAC-AGAAAGACAUG  
||||||| | |||||||||  
AACAACC-UCAUCUUUCUGUAC 5'  
AT1G07350.1 1366 1386  
transformer-SR ribonucleoprotein like protein

SRNA\_AG01\_SoLexa\_Mi2008\_3\_34916\_hit1

5' UGAAGUUGAAGAAGGAA-UCAA  
||||||| || || |||||  
ACUUCAACUUCUGCAUUGAGUU 5'  
AT1G08630.5 34 55  
unknown protein

SRNA\_AG01\_SoLexa\_Mi2008\_3\_34916\_hit1

5' UGAAGUUGAAGAAGGAA-UCAA  
||||||| || || |||||  
ACUUCAACUUCUGCAUUGAGUU 5'  
AT1G08630.4 3 24  
unknown protein

SRNA\_AG01\_SoLexa\_Mi2008\_8\_56168\_hit1

5' UUUGUGUUCUCAGGUCACCCUU  
||||||| ||||||| |||||||  
AAACACUAGAGUCCUUUGGGGAA 5'  
AT1G08830.1 116 138  
superoxidase dismutase

flowers\_1sup\_AG01\_SoLexa\_Mi\_Cell\_2008\_hit\_target\_site.txt

SRNA\_AG01\_SoLexa\_Mi2008\_1\_13516\_hit1

5' GAAGGUGACAAAGUCAGACAA  
|||||  
AUUCCACUGUUUCAGU-UGUG 5'  
AT1G09070.1 1240 1259  
unknown protein

SRNA\_AG01\_SoLexa\_Mi2008\_1\_29353\_hit1

5' UCCACCCUGUUGCUGAGGCGGA  
|||||  
AGGUGGGACAACGACUCCGCCU 5'  
AT1G09070.1 753 774  
unknown protein

SRNA\_AG01\_SoLexa\_Mi2008\_4\_11921\_hit1

5' CUGGAUCGAAGCAUUUCUC  
|||||  
AACCUUGCUUCGUAAAGAA 5'  
AT1G12010.1 272 290  
putative amino-cyclopropane-carboxylic acid oxidase (ACC oxidase)

SRNA\_AG01\_SoLexa\_Mi2008\_2\_10859\_hit1

5' CUCCAUCUCUCUCUCUGCUU  
|||||  
GAGGUAGAGAGAGAGA-GAG 5'  
AT1G12010.1 55 73  
putative amino-cyclopropane-carboxylic acid oxidase (ACC oxidase)

SRNA\_AG01\_SoLexa\_Mi2008\_1\_6621\_hit1

5' CA-GG-UGAAGAAGUAACGU  
|||  
GUACCUACUUCUUCUCUUGCA 5'  
AT1G13340.1 296 316  
unknown protein

SRNA\_AG01\_SoLexa\_Mi2008\_1\_8242\_hit1

5' CGAAAACAGAUCCGCGGAGUC  
|||||  
GCUUUUGUCUAGCGGCCUCAG 5'  
AT1G13360.1 614 634  
unknown protein (At1g13360)

SRNA\_AG01\_SoLexa\_Mi2008\_7\_13130\_hit1

5' CUUUAAACAAAACGAUAUCGUU  
|||||  
GAAAUUGUUUUGCUAUAGCAA 5'  
AT1G13360.1 705 725  
unknown protein (At1g13360)

SRNA\_AG01\_SoLexa\_Mi2008\_3\_5252\_hit2

5' CACAAAACCGCAGCUACAU-UAG  
|||  
GU-UUUUGACGUCGAUGUACAUC 5'  
AT1G14480.1 268 289  
hypothetical protein

SRNA\_AG01\_SoLexa\_Mi2008\_1\_8623\_hit1

5' CGAGGUGGCUAUGAGCGGUCG  
|||||  
GCUCCACCGAUACUCGCCAGC 5'  
AT1G14920.1 1745 1765  
signal response protein (GAI)

flowers\_1sup\_AG01\_SoLexa\_Mi\_Cell\_2008\_hit\_target\_site.txt

SRNA\_AG01\_SoLexa\_Mi2008\_9\_14254\_hit8

5' GAUGAUGAUGAUGAUGAUCUU  
|||||||:  
CUACUACUACUACUACUAGAG 5'  
AT1G14920.1 195 215  
signal response protein (GAI)

SRNA\_AG01\_SoLexa\_Mi2008\_6\_14255\_hit369

5' GAUGAUGAUGAUGAUGAUGAU  
|||||||:  
CUACUACUACUACUACUAGAG 5'  
AT1G14920.1 195 218  
signal response protein (GAI)

SRNA\_AG01\_SoLexa\_Mi2008\_1\_14256\_hit8

5' GAUGAUGAUGAUGAUGAUGUU  
|||||||:|  
CUACUACUACUACUACUAGAG 5'  
AT1G14920.1 195 218  
signal response protein (GAI)

SRNA\_AG01\_SoLexa\_Mi2008\_1\_36323\_hit13

5' UGAGGAUGAUGAUGAUGAUGA  
||| |||||  
ACUACUACUACUACUACUAGA 5'  
AT1G14920.1 196 216  
signal response protein (GAI)

SRNA\_AG01\_SoLexa\_Mi2008\_1\_3079\_hit472

5' AUGAUGAUGAUGAUGAUGAUGA  
|||||||  
UACUACUACUACUACUACUAGA 5'  
AT1G14920.1 196 217  
signal response protein (GAI)

SRNA\_AG01\_SoLexa\_Mi2008\_1\_45039\_hit3

5' UG-UGAUGAUGAUGAUGAUGAUGA  
|| |||||  
ACUACUACUACUACUACUACUAGA 5'  
AT1G14920.1 197 220  
signal response protein (GAI)

SRNA\_AG01\_SoLexa\_Mi2008\_9\_14254\_hit8

5' GAUGAUGAUGAUGAUGAUCUU  
||||||| |  
CUACUACUACUACUACUACUA 5'  
AT1G14920.1 198 218  
signal response protein (GAI)

SRNA\_AG01\_SoLexa\_Mi2008\_6\_14255\_hit369

5' GAUGAUGAUGAUGAUGAUGAUGAU  
|||||||  
GAACUACUACUACUACUACUACUA 5'  
AT1G14920.1 198 221  
signal response protein (GAI)

SRNA\_AG01\_SoLexa\_Mi2008\_7\_3078\_hit1

5' AUGAUGAUGA-GAAUGAUGAU  
||||||| || |||||  
UACUACUACUACU-ACUACUA 5'  
AT1G14920.1 199 218  
signal response protein (GAI)

flowers\_1sup\_AG01\_SoLexa\_Mi\_Cell\_2008\_hit\_target\_site.txt

SRNA\_AG01\_SoLexa\_Mi2008\_1\_36323\_hit13

5' UGAGGAUGAUGAUGAUGAUGAUGA  
||| ||||||||||||||||||||  
ACUACUACUACUACUACUACU 5'  
AT1G14920.1 199 219  
signal response protein (GAI)

SRNA\_AG01\_SoLexa\_Mi2008\_1\_3079\_hit472

5' AUGAUGAUGAUGAUGAUGAUGAUGA  
||||||||||||||||||||||  
AACUACUACUACUACUACUACU 5'  
AT1G14920.1 199 220  
signal response protein (GAI)

SRNA\_AG01\_SoLexa\_Mi2008\_1\_45039\_hit3

5' UGUGAUGAUGAUGAUGAUGAUGA  
: ||||||||||||||||||||  
GAACUACUACUACUACUACUACU 5'  
AT1G14920.1 199 221  
signal response protein (GAI)

SRNA\_AG01\_SoLexa\_Mi2008\_1\_56092\_hit3

5' UUUG-UGAUGAUGAUGAUGAUGAUGA  
||| ||||||||||||||||||||  
CAACUACUACUACUACUACUACU 5'  
AT1G14920.1 200 222  
signal response protein (GAI)

SRNA\_AG01\_SoLexa\_Mi2008\_7\_3078\_hit1

5' AUGAUGAUGA-GAAUGAUGAU  
|||||||||| || ||||||||  
UACUACUACUACU-ACUACUA 5'  
AT1G14920.1 202 221  
signal response protein (GAI)

SRNA\_AG01\_SoLexa\_Mi2008\_1\_13731\_hit1

5' GACGAAGAAGCCGAAUCGA  
||||||||||||||||||||||  
CUGCUUCUUCGGCUUAGCU 5'  
AT1G14920.1 534 552  
signal response protein (GAI)

SRNA\_AG01\_SoLexa\_Mi2008\_5\_24931\_hit2

5' UAUCAUUGUGAAGCAGAAUUC  
|||||||||||| ||||||||  
AUAGUAACACUUA-UCUUAAG 5'  
AT1G16950.1 408 427  
unknown protein

SRNA\_AG01\_SoLexa\_Mi2008\_1\_4590\_hit1

5' CAAGACAAAGAUGGUUUG  
|||||||||||| || :  
GUUCUGUUUCUACC-UACU 5'  
AT1G17210.1 2517 2534  
hypothetical protein

SRNA\_AG01\_SoLexa\_Mi2008\_2\_39987\_hit1

5' UGGACCAUGAGGAUGGAGGCU  
|||||||| ||| ||||||||  
ACCUGGUACCCCUCCUCCGA 5'  
AT1G17420.1 1694 1714  
lipoxygenase

flowers\_1sup\_AG01\_SoLexa\_Mi\_Cell\_2008\_hit\_target\_site.txt

SRNA\_AG01\_SoLexa\_Mi2008\_4\_24200\_hit5

5' UAUAAACGAAGGAAUUUGUA  
||||| |||||:|||||||  
AUAAU-GCUUCUUUAAACAG 5'  
AT1G18470.1 107 125  
unknown protein

SRNA\_AG01\_SoLexa\_Mi2008\_9\_6689\_hit1

5' CAGUCAGAAGUUUGGGAA  
|| ||||||||||||| ||  
GU-AGUCUUCAAACCC-UU 5'  
AT1G18470.1 1623 1639  
unknown protein

SRNA\_AG01\_SoLexa\_Mi2008\_9\_6689\_hit1

5' CAGUCAGAAGUUUGGGAA  
|| ||||||||||||| ||||  
GU-AGUCUUCAAAC-CCUU 5'  
AT1G18470.2 1741 1757  
unknown protein

SRNA\_AG01\_SoLexa\_Mi2008\_1\_19649\_hit1

5' UACCAAAAAUGAGAUGGACUA  
||| ||||| ||||||||| ||  
AUGUUUUUU-CUCUACCU-AU 5'  
AT1G18470.1 1770 1788  
unknown protein

SRNA\_AG01\_SoLexa\_Mi2008\_1\_19649\_hit1

5' UACCAAAAAUGAGAUGGACUA  
||| ||||| ||||||||| ||  
AUGUUUUUU-CUCUACCU-AU 5'  
AT1G18470.2 1888 1906  
unknown protein

SRNA\_AG01\_SoLexa\_Mi2008\_1\_40868\_hit1

5' UGGAUGAACUUGAUUGGACCAU  
||||| | || |||||||||||||  
ACCUAAU-GACCUAACCUUGUA 5'  
AT1G18470.2 709 729  
unknown protein

SRNA\_AG01\_SoLexa\_Mi2008\_1\_40868\_hit1

5' UGGAUGAACUUGAUUGGACCAU  
||||| | || |||||||||||||  
ACCUAAU-GACCUAACCUUGUA 5'  
AT1G18470.1 735 755  
unknown protein

SRNA\_AG01\_SoLexa\_Mi2008\_4\_24200\_hit5

5' UAUAAACGAAGGAAUUUGUA  
||||| |||||:|||||||  
AUAAU-GCUUCUUUAAACAG 5'  
AT1G18470.2 81 99  
unknown protein

SRNA\_AG01\_SoLexa\_Mi2008\_1\_40\_hit1

5' AAAAAACACAACACAAAAAU  
||||||| | |||||||||||||:  
UUUUUU-U-UUGUGUUUUUG 5'  
AT1G18570.1 1571 1588  
unknown protein

flowers\_1sup\_AG01\_SoLexa\_Mi\_Cell\_2008\_hit\_target\_site.txt

SRNA\_AG01\_SoLexa\_Mi2008\_1\_40\_hit1

5' AAAAAACACAACACAAAAAU  
| | | | | | | | | | | | | | | | | |  
UUUUUUUGUGUU-U-UUUUUU 5'  
AT1G18570.1 264 281  
unknown protein

SRNA\_AG01\_SoLexa\_Mi2008\_1\_35874\_hit2

5' UGAGAGACA-AAAUGAGAAGGU  
| | | | | | | | | | | | | | | | | |  
ACUCUCUGUGUUU-CUCUCCA 5'  
AT1G18570.1 48 68  
unknown protein

SRNA\_AG01\_SoLexa\_Mi2008\_1\_6226\_hit1

5' CAGCAAAAGAAUCAG--GAAU  
| | | | | | | | | | | | | | | | | |  
GUCGUUUCCUAGUCUUCUUA 5'  
AT1G18590.1 1138 1158  
unknown protein

SRNA\_AG01\_SoLexa\_Mi2008\_1\_6801\_hit1

5' CAUAAACAGCAGGACGAUCCU  
| | | | | | | | | | | | | | | | | |  
GUAUUUGUCGUCCUGCUAGAA 5'  
AT1G18590.1 940 960  
unknown protein

SRNA\_AG01\_SoLexa\_Mi2008\_4\_42709\_hit1

5' UGGGUGAUGAUGAUGAUUGAU  
| : | | | | | | | | | | | | | | | | | |  
UCUCACUACUACUACUAACUA 5'  
AT1G18740.1 0 20  
unknown protein

SRNA\_AG01\_SoLexa\_Mi2008\_1\_36884\_hit32

5' UGAGUUGAUGAGUCAU-UUGGU  
| | | | | | | | | | | | | | | | | |  
ACUCAACUACUCAGUUGAACCA 5'  
AT1G18740.1 190 211  
unknown protein

SRNA\_AG01\_SoLexa\_Mi2008\_1\_21856\_hit3

5' UAGAUGGGAAUCUCUCUGAUG  
| | | | | | | | | | | | | | | | | |  
AUCUACCCUUAGAGAGACUAC 5'  
AT1G18740.1 1939 1959  
unknown protein

SRNA\_AG01\_SoLexa\_Mi2008\_3\_37174\_hit2

5' UGAUGACUAAUGUCUAGAUGG  
| | | | | | | | | | | | | | | | | |  
ACUACUGAUUACAGAUCCUACC 5'  
AT1G18740.1 1953 1973  
unknown protein

SRNA\_AG01\_SoLexa\_Mi2008\_1\_21856\_hit3

5' UAGAUGGGAAUCUCUCUGAUG  
| | | | | | | | | | | | | | | | | |  
AUCUACCCUUAGAGAGACUAC 5'  
AT1G18740.1 2102 2122  
unknown protein

flowers\_1sup\_AG01\_SoLexa\_Mi\_Cell\_2008\_hit\_target\_site.txt

SRNA\_AG01\_SoLexa\_Mi2008\_3\_37174\_hit2

5' UGAUGACUAAUGUCUAGAUGG  
|||||  
ACUACUGAUUACAGAUCCUACC 5'  
AT1G18740.1 2116 2136  
unknown protein

SRNA\_AG01\_SoLexa\_Mi2008\_1\_37815\_hit1

5' UGCAAGUGAUGAUAAAAAGA  
|||||  
ACGUUCACUACUACUUUCU 5'  
AT1G18740.1 2173 2192  
unknown protein

SRNA\_AG01\_SoLexa\_Mi2008\_1\_80\_hit1

5' AAAAAAUCAACUCUGAGGCA  
|||||  
UUUUUUAGUUGAGACUCCGU 5'  
AT1G18740.1 2310 2329  
unknown protein

SRNA\_AG01\_SoLexa\_Mi2008\_1\_33\_hit1

5' AAAAAAUCAACUCUGAGGCA  
|||||  
UUUUUUAGUUGAGACUCCGU 5'  
AT1G18740.1 2310 2330  
unknown protein

SRNA\_AG01\_SoLexa\_Mi2008\_1\_13420\_hit2

5' GAAGAAGAAGAAGACUCUU  
|| |||||  
AUU-UUCUUCUUCUGA-AA 5'  
AT1G18740.1 45 61  
unknown protein

SRNA\_AG01\_SoLexa\_Mi2008\_1\_50511\_hit7

5' UUGAGAGACAGGGAAGAUGAUGAU  
||||| || || |||||  
AACUCUCUCACUACUACUACUA 5'  
AT1G18740.1 4 27  
unknown protein

SRNA\_AG01\_SoLexa\_Mi2008\_2\_50515\_hit4

5' UUGAGAGAUAGGGAAGAUGAUGAU  
||||| || || |||||  
AACUCUCUCACUACUACUACUA 5'  
AT1G18740.1 4 27  
unknown protein

SRNA\_AG01\_SoLexa\_Mi2008\_1\_42552\_hit1

5' UGGGGUUGGUUGG-UUGGUUGG  
|||||  
ACCCAACCAACCAACCAACG 5'  
AT1G19180.1 27 48  
unknown protein

SRNA\_AG01\_SoLexa\_Mi2008\_1\_42552\_hit1

5' UGGGGUUGGUUGG-UUGGUUGG  
|||||  
ACCCAACCAACCAACCAACG 5'  
AT1G19180.2 7 28  
unknown protein

flowers\_1sup\_AG01\_SoLexa\_Mi\_Cell\_2008\_hit\_target\_site.txt

SRNA\_AG01\_SoLexa\_Mi2008\_6\_14778\_hit1

5' GCUGACCAUUUGGCCGAUCCAGUU  
|||||  
CGACUGGUA AACCGGCCAGAUCAA 5'

AT1G19660.2 1002 1025  
unknown protein

SRNA\_AG01\_SoLexa\_Mi2008\_12\_5493\_hit2

5' CACCCAUUUGAUACAUAAGU  
|||| |:|||||  
GUGG-UGAACUAUGUAUCA 5'

AT1G19660.1 660 677  
unknown protein

SRNA\_AG01\_SoLexa\_Mi2008\_12\_5493\_hit2

5' CACCCAUUUGAUACAUAAGU  
|||| |:|||||  
GUGG-UGAACUAUGUAUCA 5'

AT1G19660.2 705 722  
unknown protein

SRNA\_AG01\_SoLexa\_Mi2008\_1\_8820\_hit17

5' CGCCUCGUGCUCUCUUGUGGU  
|||||  
ACGGAGCACUUGAGAACACCA 5'

AT1G19660.1 725 745  
unknown protein

SRNA\_AG01\_SoLexa\_Mi2008\_1\_8820\_hit17

5' CGCCUCGUGCUCUCUUGUGGU  
|||||  
ACGGAGCACUUGAGAACACCA 5'

AT1G19660.2 770 790  
unknown protein

SRNA\_AG01\_SoLexa\_Mi2008\_6\_14778\_hit1

5' GCUGACCAUUUGGCCGAUCCAGUU  
|||||  
CGACUGGUA AACCGGCCAGAUCAA 5'

AT1G19660.1 957 980  
unknown protein

SRNA\_AG01\_SoLexa\_Mi2008\_3\_2080\_hit1

5' AGCGAUGAUGAC-AAUGAUGA  
|||||  
ACGCUACUACUGCUU-CUACU 5'

AT1G19770.1 237 256  
unknown protein

SRNA\_AG01\_SoLexa\_Mi2008\_1\_23826\_hit1

5' UAGUGAAGAAGAGCUAUGCAUG  
:|||||  
GUCACUUCUUCUGACACG-AC 5'

AT1G19770.1 582 602  
unknown protein

SRNA\_AG01\_SoLexa\_Mi2008\_2\_3216\_hit4

5' AUGGAAGCUGCGAAAAUA-GAG  
|||:|||||  
UACUUUCGACGCUUCUAUCCUC 5'

AT1G19770.1 600 621  
unknown protein

flowers\_1sup\_AG01\_SoLexa\_Mi\_Cell\_2008\_hit\_target\_site.txt

sRNA\_AG01\_SoLexa\_Mi2008\_1\_53503\_hit1

5' UUGUCUGAGCAACGCGAUUGA  
|||||  
AACAGACUCGUUGCGCUAACU 5'  
AT1G20070.1 581 601  
unknown protein

sRNA\_AG01\_SoLexa\_Mi2008\_1\_37225\_hit4

5' UGAUGAUGAUGAUGAU-GA-AGAAG  
||||| || ||||  
ACUACUACUACUACUAGCUCACUUC 5'  
AT1G20190.1 55 79  
Expansin (AtEXPA11)

sRNA\_AG01\_SoLexa\_Mi2008\_6\_14255\_hit369

5' GAUGAUGAUGAUGAUGAU-GA-UGAU  
||||| || ||||  
CUACUACUACUACUACUAGCUCACUU 5'  
AT1G20190.1 56 81  
Expansin (AtEXPA11)

sRNA\_AG01\_SoLexa\_Mi2008\_1\_36323\_hit13

5' UGAGGAUGAUGAUGAU-GA-UGA  
||| ||||| || ||||  
ACUACUACUACUACUAGCUCACU 5'  
AT1G20190.1 57 79  
Expansin (AtEXPA11)

sRNA\_AG01\_SoLexa\_Mi2008\_1\_3079\_hit472

5' AUGAUGAUGAUGAUGAU-GA-UGA  
||||| || ||||  
UACUACUACUACUACUAGCUCACU 5'  
AT1G20190.1 57 80  
Expansin (AtEXPA11)

sRNA\_AG01\_SoLexa\_Mi2008\_9\_14254\_hit8

5' GAUGAUGAUGAUGAUGAUCUU  
|||||  
CUACUACUACUACUACUAGCU 5'  
AT1G20190.1 60 80  
Expansin (AtEXPA11)

sRNA\_AG01\_SoLexa\_Mi2008\_1\_3079\_hit472

5' AUGAUGAUGAUGAUGAUGAU-GA  
||||| || ||||  
GACUACUACUACUACUACUAGCU 5'  
AT1G20190.1 61 83  
Expansin (AtEXPA11)

sRNA\_AG01\_SoLexa\_Mi2008\_1\_45039\_hit3

5' UGUGAUGAUGAUGAUGAUGAU-GA  
| ||||| || ||||  
AGACUACUACUACUACUACUAGCU 5'  
AT1G20190.1 61 84  
Expansin (AtEXPA11)

sRNA\_AG01\_SoLexa\_Mi2008\_1\_2280\_hit1

5' AG-UGGAUGAUGAUGAUGAUG  
|| || ||||| ||||  
UCUAC-UACUACUACUACUAG 5'  
AT1G20190.1 63 82  
Expansin (AtEXPA11)

flowers\_1sup\_AG01\_SoLexa\_Mi\_Cell\_2008\_hit\_target\_site.txt

SRNA\_AG01\_SoLexa\_Mi2008\_7\_3078\_hit1

5' AUGAUGAUGA-GAAUGAUGAU  
          ||||||| || |||||  
          GACUACUACUACU-ACUACUA 5'  
AT1G20190.1     64       83  
Expansin (AtEXPA11)

SRNA\_AG01\_SoLexa\_Mi2008\_1\_36898\_hit1

5' UGAGUUGGAUGAUGAUGAUGA  
          |||| | |||||||||  
          ACUCUAC-UACUACUACUACU 5'  
AT1G20190.1     65       84  
Expansin (AtEXPA11)

SRNA\_AG01\_SoLexa\_Mi2008\_1\_39699\_hit1

5' UGGA-ACUGAUGAUGAUGAUGA  
          | || | |||||||||  
          AACUCU-ACUACUACUACUACU 5'  
AT1G20190.1     65       85  
Expansin (AtEXPA11)

SRNA\_AG01\_SoLexa\_Mi2008\_1\_36323\_hit13

5' UGAG-GAUGAUGAUGAUGAUGA  
          | || |||||||||  
          AAUCUCUACUACUACUACUACU 5'  
AT1G20190.1     65       86  
Expansin (AtEXPA11)

SRNA\_AG01\_SoLexa\_Mi2008\_1\_13759\_hit1

5' GACGAUGAUGAUGAUGACA  
          || |||||||||  
          CU-CUACUACUACUACUAC 5'  
AT1G20190.1     66       83  
Expansin (AtEXPA11)

SRNA\_AG01\_SoLexa\_Mi2008\_5\_13760\_hit2

5' GACGAUGAUGAUGAUGAGC  
          || |||||||||  
          CU-CUACUACUACUACUAC 5'  
AT1G20190.1     66       83  
Expansin (AtEXPA11)

SRNA\_AG01\_SoLexa\_Mi2008\_3\_13421\_hit1

5' GAAGAAGA-AGAUGAUGUUGAU  
          ||||| | ||||||| |||  
          CUUCUU-UCUCUACUACUACUA 5'  
AT1G20190.1     70       90  
Expansin (AtEXPA11)

SRNA\_AG01\_SoLexa\_Mi2008\_1\_36931\_hit2

5' UGAUAACCGUAGA-GCCGAUGG  
          ||||||| ||| |||||  
          ACUAUUGGC-UCUUCGGCUACC 5'  
AT1G21270.1     1076      1096  
putative protein

SRNA\_AG01\_SoLexa\_Mi2008\_2\_35299\_hit10

5' UGACAUCAACAUUUAAUGGCC  
          ||||||| |||||  
          ACUGUAGUUGUAAACUACCGG 5'  
AT1G21270.1     1213      1233  
putative protein

flowers\_1sup\_AG01\_SoLexa\_Mi\_Cell\_2008\_hit\_target\_site.txt

SRNA\_AG01\_SoLexa\_Mi2008\_3\_20869\_hit2

5' UA-GAACUUGAUUUAUCAUGAU  
|| |||| |||||||| |||||  
AUACUUGUACUAAUAACUACUA 5'  
AT1G21270.1 2369 2390  
putative protein

SRNA\_AG01\_SoLexa\_Mi2008\_1\_13420\_hit2

5' GAAGAAGAAGAAGA-CUCUU  
||||||| |||||  
CUUCUUCUUCUUCUCAAGAA 5'  
AT1G22530.1 34 53  
unknown protein

SRNA\_AG01\_SoLexa\_Mi2008\_1\_43580\_hit1

5' UGGUGGUGGUGGCGGCGCUGGU  
|||||||:| ||||| |||  
ACCACCACCGCCACCGCG-CCA 5'  
AT1G22530.1 459 479  
unknown protein

SRNA\_AG01\_SoLexa\_Mi2008\_11\_14876\_hit4

5' GGAGGUGGUGGUGGUGGUGGU  
|||| |||||||||:|||||:  
CCUCGACCACCACCGCCACCG 5'  
AT1G22530.1 463 483  
unknown protein

SRNA\_AG01\_SoLexa\_Mi2008\_1\_3\_hit25

5' AAAAAAAAAA-A-AAAGAAAGA  
||||||| | |||||||:|  
UUUUUUUUUCUCUUUCUUUUU 5'  
AT1G23000.1 1385 1405  
unknown protein

SRNA\_AG01\_SoLexa\_Mi2008\_1\_44585\_hit1

5' UGUCCACCAUU-GAUGUUCUGC  
|||| ||| || |||||||||  
ACAG-UGGAAAACUACAAGACG 5'  
AT1G23000.1 349 369  
unknown protein

SRNA\_AG01\_SoLexa\_Mi2008\_1\_37103\_hit1

5' UGAUCGCUCAGGUCUGGUGGG  
||||||| |||||||||  
ACUAGCGAGUCCAGACCACCC 5'  
AT1G27340.1 1243 1263  
unknown protein

SRNA\_AG01\_SoLexa\_Mi2008\_1\_55653\_hit2

5' UUUGGCAUUCUGUCCACCUCC  
||||||| |||||||  
AAACCGUAAGACAGUUGGAGG 5'  
AT1G27340.1 1372 1392  
unknown protein

SRNA\_AG01\_SoLexa\_Mi2008\_1\_43831\_hit1

5' UGGUUGUGGCUC-UGGUGGUAA  
|||| ||||| | |||||||||  
ACCACCACCG-GCACCACCAUU 5'  
AT1G28290.2 158 178  
proline-rich protein, putative

flowers\_1sup\_AG01\_SoLexa\_Mi\_Cell\_2008\_hit\_target\_site.txt

SRNA\_AG01\_SoLexa\_Mi2008\_1\_35934\_hit2

5' UGAG-AGUGAUGUGGGUGGUGGU  
|||| || | |||||  
ACUCCUCCC-ACACCCACCACCA 5'

AT1G28290.2 172 193  
proline-rich protein, putative

SRNA\_AG01\_SoLexa\_Mi2008\_1\_43831\_hit1

5' UGGUUGUGGCUC-UGGUGGUA  
|||| |||| | |||||  
ACCACCACCG-GCACCACCAU 5'

AT1G28290.1 276 296  
proline-rich protein, putative

SRNA\_AG01\_SoLexa\_Mi2008\_1\_35934\_hit2

5' UGAG-AGUGAUGUGGGUGGUGGU  
|||| || | |||||  
ACUCCUCCC-ACACCCACCACCA 5'

AT1G28290.1 290 311  
proline-rich protein, putative

SRNA\_AG01\_SoLexa\_Mi2008\_1\_43744\_hit2

5' UGGUUAGAGGGUAAAUUGGUC  
|||| |||||:||||  
ACCAACCUCCAUUUGACCAC 5'

AT1G28290.2 396 416  
proline-rich protein, putative

SRNA\_AG01\_SoLexa\_Mi2008\_1\_43744\_hit2

5' UGGUUAGAGGGUAAAUUGGUC  
|||| |||||:||||  
ACCAACCUCCAUUUGACCAC 5'

AT1G28290.2 456 476  
proline-rich protein, putative

SRNA\_AG01\_SoLexa\_Mi2008\_1\_43744\_hit2

5' UGGUUAGAGGGUAAAUUGGUC  
|||| |||||:||||  
ACCAACCUCCAUUUGACCAC 5'

AT1G28290.1 514 534  
proline-rich protein, putative

SRNA\_AG01\_SoLexa\_Mi2008\_1\_43744\_hit2

5' UGGUUAGAGGGUAAAUUGGUC  
|||| |||||:||||  
ACCAACCUCCAUUUGACCAC 5'

AT1G28290.1 574 594  
proline-rich protein, putative

SRNA\_AG01\_SoLexa\_Mi2008\_1\_43744\_hit2

5' UGGUUAGAGGGUAAAUUGGUC  
|||| |||||:||||  
ACCAACCUCCAUUUGACCAC 5'

AT1G28290.1 634 654  
proline-rich protein, putative

SRNA\_AG01\_SoLexa\_Mi2008\_1\_336\_hit2

5' AAAGAAAAAAAAAGUAUUGA  
||| ||||| |||||  
UUU-UUUUUUUUAUAACC 5'

AT1G28370.1 687 705  
putative ethylene responsive element binding factor 4 protein

flowers\_1sup\_AG01\_SoLexa\_Mi\_Cell\_2008\_hit\_target\_site.txt

SRNA\_AG01\_SoLexa\_Mi2008\_1\_1776\_hit10

5' AGAAAAAAAAAAAAAAAAAAAAU  
| |||||  
UGGUUUUUUUUUUUUUUUUA 5'

AT1G28370.1 692 712  
putative ethylene responsive element binding factor 4 protein

SRNA\_AG01\_SoLexa\_Mi2008\_1\_3\_hit25

5' AAAAAAAAAAAAAAGAAAGA  
|||:|  
UUUUUUUUUUUUUU-UUUUA 5'

AT1G28370.1 693 710  
putative ethylene responsive element binding factor 4 protein

SRNA\_AG01\_SoLexa\_Mi2008\_3\_8177\_hit1

5' CCUGA-UAAAGUAAAAUCUCCAU  
||| ||| |||  
GGACUUUUUUCAUAAUAGAGGUA 5'

AT1G28370.1 950 972  
putative ethylene responsive element binding factor 4 protein

SRNA\_AG01\_SoLexa\_Mi2008\_1\_1549\_hit1

5' ACC-GGAGAAGAAGAAGAUAGAC  
||| ||| |||  
UGGUCCUCU-CUUCUUCUACUA 5'

AT1G30220.1 1422 1442  
unknown protein

SRNA\_AG01\_SoLexa\_Mi2008\_1\_47831\_hit2

5' UUAGGGUUAAAUGAGUUUAUGA  
|| ||| ||| |||  
AA-CCCAAUUUUCUCAAU-CU 5'

AT1G30220.1 8 26  
unknown protein

SRNA\_AG01\_SoLexa\_Mi2008\_1\_28030\_hit4

5' UCAGAAGAAGCCAC-GUCAGAUGA  
||| ||| ||| |||  
AGUCUUCUUCU-UGGCAGUCUACU 5'

AT1G35210.1 259 281  
unknown protein

SRNA\_AG01\_SoLexa\_Mi2008\_1\_919\_hit1

5' AAGGCUAAUGUUGUGAUCUUC  
||| | ||| ||| ||| |||  
GUCCG-U-ACAACACUAGAAG 5'

AT1G35310.1 137 155  
unknown protein

SRNA\_AG01\_SoLexa\_Mi2008\_1\_14083\_hit2

5' GAGGCCAAUGUUGUGAUCUA  
||| | ||| ||| ||| |||  
CUCCG-U-ACAACACUAGAA 5'

AT1G35310.1 138 155  
unknown protein

SRNA\_AG01\_SoLexa\_Mi2008\_1\_26497\_hit1

5' UAUUUGUGA-GAGUUCGUGAAA  
| ||| ||| ||| ||| ||| |||  
AGAAA-ACUACUCAAGCACUUU 5'

AT1G35710.1 129 149  
protein kinase, putative

flowers\_1sup\_AGO1\_SoLexa\_Mi\_Cell\_2008\_hit\_target\_site.txt

SRNA\_AGO1\_SoLexa\_Mi2008\_1\_19304\_hit2

5' UACACGUUCAUCGGAAAUGCU  
|||||  
AUGUGCAAGUAGCCUUUACGA 5'  
AT1G35710.1 3219 3239  
protein kinase, putative

SRNA\_AGO1\_SoLexa\_Mi2008\_2\_5215\_hit1

5' CAAUUAG-UGGAGAAGUUCA  
|||||  
AUUAA-CUACCUCUUCAAGU 5'  
AT1G35710.1 3368 3386  
protein kinase, putative

SRNA\_AGO1\_SoLexa\_Mi2008\_10\_17146\_hit1

5' UAACAACAACAAC-AAAGGUGAA  
|||||  
AUUGUUGUUGUUGUUUCGACUU 5'  
AT1G35710.1 3487 3509  
protein kinase, putative

SRNA\_AGO1\_SoLexa\_Mi2008\_2\_35306\_hit1

5' UGACAUCGAUGA-UUGGUUUCG  
|||||  
ACUGUAUCU-CUUAACCAAAGC 5'  
AT1G44750.2 336 356  
Unknown protein (At1g44750)

SRNA\_AGO1\_SoLexa\_Mi2008\_2\_35306\_hit1

5' UGACAUCGAUGA-UUGGUUUCG  
|||||  
ACUGUAUCU-CUUAACCAAAGC 5'  
AT1G44750.3 88 108  
Unknown protein (At1g44750)

SRNA\_AGO1\_SoLexa\_Mi2008\_2\_44202\_hit1

5' UGUAGGACGAAUGCUUUGGUA  
|||||  
ACAUCCUGCUUACGAAACCAU 5'  
AT1G48410.1 1250 1270  
Argonaute protein (AGO1)

SRNA\_AGO1\_SoLexa\_Mi2008\_2\_44202\_hit1

5' UGUAGGACGAAUGCUUUGGUA  
|||||  
ACAUCCUGCUUACGAAACCAU 5'  
AT1G48410.2 1256 1276  
Argonaute protein (AGO1)

SRNA\_AGO1\_SoLexa\_Mi2008\_13\_6596\_hit1

5' CAGGUAACCUUCAGCAAAGCA  
|||||  
GUCCAUUGGAAGUCGUUUCGU 5'  
AT1G48410.1 1711 1731  
Argonaute protein (AGO1)

SRNA\_AGO1\_SoLexa\_Mi2008\_13\_6596\_hit1

5' CAGGUAACCUUCAGCAAAGCA  
|||||  
GUCCAUUGGAAGUCGUUUCGU 5'  
AT1G48410.2 1717 1737  
Argonaute protein (AGO1)

flowers\_1sup\_AG01\_SoLexa\_Mi\_Cell\_2008\_hit\_target\_site.txt

SRNA\_AG01\_SoLexa\_Mi2008\_16\_26870\_hit1

5' UCAACAGAAGCCAGAGAAGUA  
 |||  
 AGUUGUCUUCGGUCUCUUCAU 5'  
 AT1G48410.1 1831 1851  
 Argonaute protein (AG01)

SRNA\_AG01\_SoLexa\_Mi2008\_16\_26870\_hit1

5' UCAACAGAAGCCAGAGAAGUA  
 |||  
 AGUUGUCUUCGGUCUCUUCAU 5'  
 AT1G48410.2 1837 1857  
 Argonaute protein (AG01)

SRNA\_AG01\_SoLexa\_Mi2008\_3\_40523\_hit1

5' UGGAGGAGGCAGUAUACGAGC  
 |||  
 ACCUCCUCCGUCAUAUGCUCG 5'  
 AT1G48410.1 1853 1873  
 Argonaute protein (AG01)

SRNA\_AG01\_SoLexa\_Mi2008\_3\_40523\_hit1

5' UGGAGGAGGCAGUAUACGAGC  
 |||  
 ACCUCCUCCGUCAUAUGCUCG 5'  
 AT1G48410.2 1859 1879  
 Argonaute protein (AG01)

SRNA\_AG01\_SoLexa\_Mi2008\_2\_28543\_hit1

5' UCAGGGCGAGCACUGACUGGU  
 |||  
 AGUCCCGCUCGUGACUGACCA 5'  
 AT1G48410.1 2098 2118  
 Argonaute protein (AG01)

SRNA\_AG01\_SoLexa\_Mi2008\_2\_28543\_hit1

5' UCAGGGCGAGCACUGACUGGU  
 |||  
 AGUCCCGCUCGUGACUGACCA 5'  
 AT1G48410.2 2104 2124  
 Argonaute protein (AG01)

SRNA\_AG01\_SoLexa\_Mi2008\_2\_36850\_hit22

5' UGAGUGUGGUCCUCCUCUCC  
 ||| | |||  
 ACUC-CUCCAGGAGGAGAAGG 5'  
 AT1G48410.2 417 436  
 Argonaute protein (AG01)

SRNA\_AG01\_SoLexa\_Mi2008\_1\_55475\_hit2

5' UUUG-CUC-GCGGUGGUCCAGAC  
 ||| ||| |||  
 AAACAGAGACGCCACCAGGUCUU 5'  
 AT1G48410.2 485 507  
 Argonaute protein (AG01)

SRNA\_AG01\_SoLexa\_Mi2008\_46\_8918\_hit2

5' CGCUUGGUGCAGGUCGGGAAC  
 ||||:|||| |||  
 UCGAACUACGUCGAGCCCUUG 5'  
 AT1G48410.2 509 529  
 Argonaute protein (AG01)

flowers\_1sup\_AG01\_SoLexa\_Mi\_Cell\_2008\_hit\_target\_site.txt

SRNA\_AG01\_SoLexa\_Mi2008\_1\_39168\_hit1

5' UGCUAGAAGAAGGUUAGGCU  
|||||  
ACGAUCUUCUCCAUAUCCGA 5'  
AT1G48410.2 669 689  
Argonaute protein (AG01)

SRNA\_AG01\_SoLexa\_Mi2008\_5\_6229\_hit1

5' CAGCAAAGAAAUGGUUAGCC  
|||||  
GUCGUUUCUUUACCAAUCGG 5'  
AT1G48410.2 751 770  
Argonaute protein (AG01)

SRNA\_AG01\_SoLexa\_Mi2008\_1\_28240\_hit1

5' UCAGCAAAGAAAUGGUUAGCC  
|||||  
AGUCGUUUCUUUACCAAUCGG 5'  
AT1G48410.2 751 771  
Argonaute protein (AG01)

SRNA\_AG01\_SoLexa\_Mi2008\_1\_28621\_hit15

5' UC-AGGUUGUCUGGUU-GAGUG  
|| |||||  
AGAUGCAACAGACCAAACUCUC 5'  
AT1G49470.1 293 314  
unknown protein

SRNA\_AG01\_SoLexa\_Mi2008\_1\_18744\_hit1

5' UAAUGAGGUGGAGGAACAUGGA  
|||||  
AUUACUCCACCUUGUACCU 5'  
AT1G49470.1 321 342  
unknown protein

SRNA\_AG01\_SoLexa\_Mi2008\_1\_53557\_hit1

5' UUGUGAGUAAUA--GUGUAUGUGA  
||||| |||| |||  
AACACUCAUUAUCGCACACACA 5'  
AT1G50420.1 -1 22  
scarecrow 3 -like protein

SRNA\_AG01\_SoLexa\_Mi2008\_1\_12127\_hit1

5' CUGGUGGUUAUCUUGUGAGUA  
|||||  
GACCACCAUAGAACACUCAU 5'  
AT1G50420.1 13 33  
scarecrow 3 -like protein

SRNA\_AG01\_SoLexa\_Mi2008\_1\_14022\_hit2

5' GAGCUCU-UUC-UUGAUUCUA  
| ||||| ||| |||||  
CCCGAGAGAAGGAACUAAGAU 5'  
AT1G50420.1 1613 1633  
scarecrow 3 -like protein

SRNA\_AG01\_SoLexa\_Mi2008\_2\_654\_hit1

5' AACAGCAUGUGAUUUUAUCA  
|||| |||||  
ACGUCG-ACACUUAUUAUAGU 5'  
AT1G51940.1 702 720  
protein kinase like protein

flowers\_1sup\_AG01\_SoLexa\_Mi\_Cell\_2008\_hit\_target\_site.txt

SRNA\_AG01\_SoLexa\_Mi2008\_2\_2818\_hit2

5' AUCAUUGCAAUUGUU-GGUCUU  
||||||| | ||| |||||  
UAGUAACGUGA-CAAACCAGAA 5'

AT1G51950.1 1338 1358  
IAA18 early auxin-induced protein

SRNA\_AG01\_SoLexa\_Mi2008\_3\_13373\_hit1

5' GAAC-A-AGAAGAAUCUUGCAU  
|||| | ||||| ||||| |  
CUUGAUGUCUUCUAGAACGCA 5'

AT1G51950.1 317 338  
IAA18 early auxin-induced protein

SRNA\_AG01\_SoLexa\_Mi2008\_1\_34289\_hit2

5' UGAAAUCGAUGUUGU-AAGUCC  
:||||||| || |||||  
GCUUUAGCUACAUCAUUCAGG 5'

AT1G52400.2 1567 1588  
beta-glucosidase, putative

SRNA\_AG01\_SoLexa\_Mi2008\_2\_23683\_hit1

5' UAGUA-UGGU-GUAGUAGUAGUA  
:|||| |||| | ||||| |||||  
GUCAUCACCAGCAUCAUCAU 5'

AT1G52690.2 565 587  
unknown protein

SRNA\_AG01\_SoLexa\_Mi2008\_1\_33431\_hit1

5' UCUGAUCUGUGGUCGCUUGAA  
|||:||||||| |||||  
AGAUUAGACACCAGCGAACUU 5'

AT1G53160.1 558 578  
squamosa promoter binding protein-like 4 (spl4)

SRNA\_AG01\_SoLexa\_Mi2008\_1\_33431\_hit1

5' UCUGAUCUGUGGUCGCUUGAA  
|||:||||||| |||||  
AGAUUAGACACCAGCGAACUU 5'

AT1G53160.2 560 580  
squamosa promoter binding protein-like 4 (spl4)

SRNA\_AG01\_SoLexa\_Mi2008\_1\_1352\_hit1

5' ACAGAAGAGAGAGACACU  
||||||| |||||  
UGUCUUCUCUCUCGUCU 5'

AT1G53160.1 590 608  
squamosa promoter binding protein-like 4 (spl4)

SRNA\_AG01\_SoLexa\_Mi2008\_70\_1353\_hit7

5' ACAGAAGAGAGUGAGACA  
||||||| ||||| |  
UGUCUUCUCUCUCGUCU 5'

AT1G53160.1 590 608  
squamosa promoter binding protein-like 4 (spl4)

SRNA\_AG01\_SoLexa\_Mi2008\_83\_1355\_hit2

5' ACAGAAGAUAGAGACACU  
||||||| |||||  
UGUCUUCUCUCUCGUCU 5'

AT1G53160.1 590 608  
squamosa promoter binding protein-like 4 (spl4)

SRNA\_AG01\_SoLexa\_Mi2008\_1\_13615\_hit4  
5' GACAGAAGAGAGAGAGCACA  
|  
CUGUCUUCUCUCUCUCGUCU 5'  
AT1G53160.1 590 609  
squamosa promoter binding protein-like 4 (spl4)

SRNA\_AG01\_SoLexa\_Mi2008\_150\_13617\_hit7  
5' GACAGAAGAGAGAGAGCACA  
|  
CUGUCUUCUCUCUCUCGUCU 5'  
AT1G53160.1 590 609  
squamosa promoter binding protein-like 4 (spl4)

SRNA\_AG01\_SoLexa\_Mi2008\_161\_13619\_hit2  
5' GACAGAAGAUAGAGAGCACU  
|  
CUGUCUUCUCUCUCUCGUCU 5'  
AT1G53160.1 590 609  
squamosa promoter binding protein-like 4 (spl4)

SRNA\_AG01\_SoLexa\_Mi2008\_2\_35238\_hit4  
5' UGACAGAAGAGAGAGAGCACA  
|  
ACUGUCUUCUCUCUCUCGUCU 5'  
AT1G53160.1 590 610  
squamosa promoter binding protein-like 4 (spl4)

SRNA\_AG01\_SoLexa\_Mi2008\_714\_35241\_hit6  
5' UGACAGAAGAGAGAGAGCACA  
|  
ACUGUCUUCUCUCUCUCGUCU 5'  
AT1G53160.1 590 610  
squamosa promoter binding protein-like 4 (spl4)

SRNA\_AG01\_SoLexa\_Mi2008\_4\_35245\_hit2  
5' UGACAGAAGAUAGAGAGCACA  
|  
ACUGUCUUCUCUCUCUCGUCU 5'  
AT1G53160.1 590 610  
squamosa promoter binding protein-like 4 (spl4)

SRNA\_AG01\_SoLexa\_Mi2008\_66\_35246\_hit2  
5' UGACAGAAGAUAGAGAGCACU  
|  
ACUGUCUUCUCUCUCUCGUCU 5'  
AT1G53160.1 590 610  
squamosa promoter binding protein-like 4 (spl4)

SRNA\_AG01\_SoLexa\_Mi2008\_6\_13612\_hit1  
5' GACAGAAGAAAGAGAGCAC  
|  
CUGUCUUCUCUCUCUCGUC 5'  
AT1G53160.1 591 609  
squamosa promoter binding protein-like 4 (spl4)

SRNA\_AG01\_SoLexa\_Mi2008\_1\_13614\_hit8  
5' GACAGAAGAGAGAGAGCAC  
|  
CUGUCUUCUCUCUCUCGUC 5'  
AT1G53160.1 591 609  
squamosa promoter binding protein-like 4 (spl4)

SRNA\_AG01\_SoLexa\_Mi2008\_480\_13616\_hit7  
5' GACAGAAGAGAGUGAGCAC  
|||||  
CUGUCUUCUCUCUCUCGUC 5'  
AT1G53160.1 591 609  
squamosa promoter binding protein-like 4 (spl4)

SRNA\_AG01\_SoLexa\_Mi2008\_855\_13618\_hit4  
5' GACAGAAGAUAGAGAGCAC  
|||||  
CUGUCUUCUCUCUCUCGUC 5'  
AT1G53160.1 591 609  
squamosa promoter binding protein-like 4 (spl4)

SRNA\_AG01\_SoLexa\_Mi2008\_3\_8396\_hit1  
5' CGACAGAAGAGAGUGAGCAC  
|||||  
ACUGUCUUCUCUCUCUCGUC 5'  
AT1G53160.1 591 610  
squamosa promoter binding protein-like 4 (spl4)

SRNA\_AG01\_SoLexa\_Mi2008\_6\_35236\_hit1  
5' UGACAGAAGAAAGAGAGCAC  
|||||  
ACUGUCUUCUCUCUCUCGUC 5'  
AT1G53160.1 591 610  
squamosa promoter binding protein-like 4 (spl4)

SRNA\_AG01\_SoLexa\_Mi2008\_12\_35237\_hit8  
5' UGACAGAAGAGAGAGAGCAC  
|||||  
ACUGUCUUCUCUCUCUCGUC 5'  
AT1G53160.1 591 610  
squamosa promoter binding protein-like 4 (spl4)

SRNA\_AG01\_SoLexa\_Mi2008\_2091\_35240\_hit6  
5' UGACAGAAGAGAGUGAGCAC  
|||||  
ACUGUCUUCUCUCUCUCGUC 5'  
AT1G53160.1 591 610  
squamosa promoter binding protein-like 4 (spl4)

SRNA\_AG01\_SoLexa\_Mi2008\_193\_35244\_hit4  
5' UGACAGAAGAUAGAGAGCAC  
|||||  
ACUGUCUUCUCUCUCUCGUC 5'  
AT1G53160.1 591 610  
squamosa promoter binding protein-like 4 (spl4)

SRNA\_AG01\_SoLexa\_Mi2008\_28\_11427\_hit3  
5' CUGACAGAAGAGAGUGAGCAC  
|||||  
UACUGUCUUCUCUCUCUCGUC 5'  
AT1G53160.1 591 611  
squamosa promoter binding protein-like 4 (spl4)

SRNA\_AG01\_SoLexa\_Mi2008\_79\_11430\_hit1  
5' CUGACAGAAGAUAGAGAGCAC  
|||||  
UACUGUCUUCUCUCUCUCGUC 5'  
AT1G53160.1 591 611  
squamosa promoter binding protein-like 4 (spl4)

SRNA\_AG01\_SoLexa\_Mi2008\_4\_15853\_hit2  
5' GUGACAGAAGAGAGUGAGCAC  
  :|||||  
  UACUGUCUUCUCUCUCGUC 5'  
AT1G53160.1 591 611  
squamosa promoter binding protein-like 4 (spl4)

SRNA\_AG01\_SoLexa\_Mi2008\_12\_50256\_hit1  
5' UUGACAGAAGAAAGAGAGCAC  
  |||||  
  UACUGUCUUCUCUCUCGUC 5'  
AT1G53160.1 591 611  
squamosa promoter binding protein-like 4 (spl4)

SRNA\_AG01\_SoLexa\_Mi2008\_14\_50257\_hit5  
5' UUGACAGAAGAGAGAGAGCAC  
  |||||  
  UACUGUCUUCUCUCUCGUC 5'  
AT1G53160.1 591 611  
squamosa promoter binding protein-like 4 (spl4)

SRNA\_AG01\_SoLexa\_Mi2008\_1778\_50260\_hit1  
5' UUGACAGAAGAGAGUGAGCAC  
  |||||  
  UACUGUCUUCUCUCUCGUC 5'  
AT1G53160.1 591 611  
squamosa promoter binding protein-like 4 (spl4)

SRNA\_AG01\_SoLexa\_Mi2008\_4050\_50264\_hit3  
5' UUGACAGAAGAUAGAGAGCAC  
  |||||  
  UACUGUCUUCUCUCUCGUC 5'  
AT1G53160.1 591 611  
squamosa promoter binding protein-like 4 (spl4)

SRNA\_AG01\_SoLexa\_Mi2008\_30\_35239\_hit6  
5' UGACAGAAGAGAGUGAGCA  
  |||||  
  ACUGUCUUCUCUCUCGU 5'  
AT1G53160.1 592 610  
squamosa promoter binding protein-like 4 (spl4)

SRNA\_AG01\_SoLexa\_Mi2008\_1\_11426\_hit3  
5' CUGACAGAAGAGAGUGAGCA  
  |||||  
  UACUGUCUUCUCUCUCGU 5'  
AT1G53160.1 592 611  
squamosa promoter binding protein-like 4 (spl4)

SRNA\_AG01\_SoLexa\_Mi2008\_2\_11429\_hit1  
5' CUGACAGAAGAUAGAGAGCA  
  |||||  
  UACUGUCUUCUCUCUCGU 5'  
AT1G53160.1 592 611  
squamosa promoter binding protein-like 4 (spl4)

SRNA\_AG01\_SoLexa\_Mi2008\_16\_50259\_hit1  
5' UUGACAGAAGAGAGUGAGCA  
  |||||  
  UACUGUCUUCUCUCUCGU 5'  
AT1G53160.1 592 611  
squamosa promoter binding protein-like 4 (spl4)

flowers\_1sup\_AG01\_SoLexa\_Mi\_Cell\_2008\_hit\_target\_site.txt

SRNA\_AG01\_SoLexa\_Mi2008\_122\_50263\_hit3

5' UUGACAGAAGAUAGAGAGCA  
||||||| |||||  
UACUGUCUUCUCUCUCUGU 5'

AT1G53160.1 592 611  
squamosa promoter binding protein-like 4 (spl4)

SRNA\_AG01\_SoLexa\_Mi2008\_1\_50258\_hit1

5' UUGACAGAAGAGAGUGAGC  
||||||| |||||  
UACUGUCUUCUCUCUCUG 5'

AT1G53160.1 593 611  
squamosa promoter binding protein-like 4 (spl4)

SRNA\_AG01\_SoLexa\_Mi2008\_21\_50262\_hit3

5' UUGACAGAAGAUAGAGAGC  
||||||| |||||  
UACUGUCUUCUCUCUCUG 5'

AT1G53160.1 593 611  
squamosa promoter binding protein-like 4 (spl4)

SRNA\_AG01\_SoLexa\_Mi2008\_1\_37308\_hit1

5' UGAUGGAGAAGAUCAAACCUAA  
||||| || ||||| ||  
ACUACCACUCCUAGUUUGG-UU 5'

AT1G53230.1 1226 1246  
flower development cycloidea like protein

SRNA\_AG01\_SoLexa\_Mi2008\_6\_14255\_hit369

5' GAUGAUGAUGAUGAUGAUGAUGAU  
||||||| ||||| |||||  
CUACUACUACUACUACCACUCCUA 5'

AT1G53230.1 1233 1256  
flower development cycloidea like protein

SRNA\_AG01\_SoLexa\_Mi2008\_6\_14255\_hit369

5' GAUGAUGAUGAUGAUGAUGAUGAU  
||||||| ||||| |||||  
CUACUACUACUACUACUACCACUC 5'

AT1G53230.1 1236 1259  
flower development cycloidea like protein

SRNA\_AG01\_SoLexa\_Mi2008\_1\_36323\_hit13

5' UGAGGAUGAUGAUGAUGAUGAUGA  
||| ||||| ||||| |||||  
ACUACUACUACUACUACCACU 5'

AT1G53230.1 1237 1257  
flower development cycloidea like protein

SRNA\_AG01\_SoLexa\_Mi2008\_1\_3079\_hit472

5' AUGAUGAUGAUGAUGAUGAUGAUGA  
||||||| ||||| |||||  
UACUACUACUACUACUACCACU 5'

AT1G53230.1 1237 1258  
flower development cycloidea like protein

SRNA\_AG01\_SoLexa\_Mi2008\_1\_56092\_hit3

5' UUUG-UGAUGAUGAUGAUGAUGAUGA  
: ||| ||||| ||||| |||||  
GAACUACUACUACUACUACCACU 5'

AT1G53230.1 1238 1260  
flower development cycloidea like protein

flowers\_1sup\_AG01\_SoLexa\_Mi\_Cell\_2008\_hit\_target\_site.txt

SRNA\_AG01\_SoLexa\_Mi2008\_1\_45039\_hit3

5' UG-UGAUGAUGAUGAUGAUGAUGA  
|| ||||||||||||||||||||| |||  
ACUACUACUACUACUACUACCACU 5'

AT1G53230.1 1238 1261  
flower development cycloidea like protein

SRNA\_AG01\_SoLexa\_Mi2008\_9\_14254\_hit8

5' GAUGAUGAUGAUGAUGAUCUU  
||||||||||||||||||| |  
CUACUACUACUACUACUACCA 5'

AT1G53230.1 1239 1259  
flower development cycloidea like protein

SRNA\_AG01\_SoLexa\_Mi2008\_7\_3078\_hit1

5' AUGAUGAUGA-GAAUGAUGAU  
||||||||||| | ||||| |  
UACUACUACUAC-UACUACCA 5'

AT1G53230.1 1240 1259  
flower development cycloidea like protein

SRNA\_AG01\_SoLexa\_Mi2008\_1\_36323\_hit13

5' UGAGGAUGAUGAUGAUGAUGA  
||| |||||||||||||||||  
ACUACUACUACUACUACUACC 5'

AT1G53230.1 1240 1260  
flower development cycloidea like protein

SRNA\_AG01\_SoLexa\_Mi2008\_1\_3079\_hit472

5' AUGAUGAUGAUGAUGAUGAUGA  
|||||||||||||||||||  
GACUACUACUACUACUACUACC 5'

AT1G53230.1 1240 1261  
flower development cycloidea like protein

SRNA\_AG01\_SoLexa\_Mi2008\_1\_45039\_hit3

5' UG-UGAUGAUGAUGAUGAUGAUGA  
|| |||||||||||||||||||||  
ACGACUACUACUACUACUACUACC 5'

AT1G53230.1 1241 1264  
flower development cycloidea like protein

SRNA\_AG01\_SoLexa\_Mi2008\_1\_38921\_hit1

5' UGCGGACGAUGAUGAUGAUGAU  
||| || |||||||||||||||||  
ACGACUACUACUACUACUACUA 5'

AT1G53230.1 1242 1263  
flower development cycloidea like protein

SRNA\_AG01\_SoLexa\_Mi2008\_7\_3078\_hit1

5' AUGAUGAUGA-GAAUGAUGAU  
||||||||||| || ||||| |  
CACUACUACUACU-ACUACUA 5'

AT1G53230.1 1243 1262  
flower development cycloidea like protein

SRNA\_AG01\_SoLexa\_Mi2008\_3\_39351\_hit1

5' UGCUGAUGAUGCUGAUG-UGAC  
||||||||||| ||||| |||  
ACGACUACUACUACUACUACUA 5'

AT1G53230.1 1243 1264  
flower development cycloidea like protein

flowers\_1sup\_AG01\_SoLexa\_Mi\_Cell\_2008\_hit\_target\_site.txt

SRNA\_AG01\_SoLexa\_Mi2008\_6\_14255\_hit369

5' GA-UGAUGAUGAUGAUGAUGAUGAU  
|| || ||||||||||||||||||||  
CUGACGACUACUACUACUACUACUA 5'  
AT1G53230.1 1243 1267  
flower development cycloidea like protein

SRNA\_AG01\_SoLexa\_Mi2008\_1\_56092\_hit3

5' UUUUG-UGAUGAUGAUGAUGAUGA  
| || ||||||||||||||||||||  
ACACGACUACUACUACUACUACU 5'  
AT1G53230.1 1244 1266  
flower development cycloidea like protein

SRNA\_AG01\_SoLexa\_Mi2008\_2\_31619\_hit1

5' UCGCUGAUGAUGAUUGAUGAU  
||||||| |||||  
CUCGACUACUACUA-CUACUA 5'  
AT1G53230.1 1246 1265  
flower development cycloidea like protein

SRNA\_AG01\_SoLexa\_Mi2008\_1\_39699\_hit1

5' UGGAACUGAUGAUGAUGAUGA  
|||| ||| ||||||||||||  
ACCU-GACGACUACUACUACU 5'  
AT1G53230.1 1250 1269  
flower development cycloidea like protein

SRNA\_AG01\_SoLexa\_Mi2008\_1\_28327\_hit1

5' UCAGCCGCAACCACCACUGUG  
|| |||||||||||||||| ||  
AG-CGGCGUUGGUGGUGG-CAA 5'  
AT1G53230.1 372 391  
flower development cycloidea like protein

SRNA\_AG01\_SoLexa\_Mi2008\_1\_13897\_hit2

5' GAGAAAUCAAAGUUUUUGGGUU  
||||||| |||||||| ||||  
CUCUUUAAUUUCAAAA--CCAA 5'  
AT1G53230.1 689 708  
flower development cycloidea like protein

SRNA\_AG01\_SoLexa\_Mi2008\_1\_19666\_hit1

5' UACCAACAGCAGAAUC-CACCAU  
|||||||||||:|||| || |||  
AUGGUUGUCGUUUUAGUGU-GUA 5'  
AT1G54100.2 487 508  
unknown protein

SRNA\_AG01\_SoLexa\_Mi2008\_1\_19666\_hit1

5' UACCAACAGCAGAAUC-CACCAU  
|||||||||||:|||| || |||  
AUGGUUGUCGUUUUAGUGU-GUA 5'  
AT1G54100.1 538 559  
unknown protein

SRNA\_AG01\_SoLexa\_Mi2008\_12\_46414\_hit1

5' UUAACGCCGUGAUUGUU-UGGU  
||||||| ||||||||| ||:|  
AAUUGCUGCACUAACAACACUA 5'  
AT1G55020.1 340 361  
unknown protein

flowers\_1sup\_AG01\_SoLexa\_Mi\_Cell\_2008\_hit\_target\_site.txt

SRNA\_AG01\_SoLexa\_Mi2008\_1\_28726\_hit1

5' UCAGUGUGGAAGCUAAGUCUC  
||| ||||| |||||  
AGU-ACACCUUCUAUUCAGAA 5'  
AT1G55020.1 577 596  
unknown protein

SRNA\_AG01\_SoLexa\_Mi2008\_1\_46444\_hit1

5' UUAACUCUGUGAUUGUUU-GGU  
||||| ||||| ||| ||:  
AAUUGAGACACUAAGAAAUCCG 5'  
AT1G56010.1 1000 1021  
NAC1

SRNA\_AG01\_SoLexa\_Mi2008\_1\_46444\_hit1

5' UUAACUCUGUGAUUGUUU-GGU  
||||| ||||| ||| ||:  
AAUUGAGACACUAAGAAAUCCG 5'  
AT1G56010.2 1025 1046  
NAC1

SRNA\_AG01\_SoLexa\_Mi2008\_1\_13477\_hit1

5' GAAGCAGGGCACGUG--CAUU  
||||| ||||| ||||  
CUUCGUCCCAUGCACGAGUAA 5'  
AT1G56010.1 773 793  
NAC1

SRNA\_AG01\_SoLexa\_Mi2008\_2\_14844\_hit1

5' GGAGAAGCAGGGCACGUG--CAUU  
||||| ||||| ||||  
CCUCUUCGUCCCAUGCACGAGUAA 5'  
AT1G56010.1 773 796  
NAC1

SRNA\_AG01\_SoLexa\_Mi2008\_91\_40198\_hit1

5' UGGAGAAGCAGGGCACGUG--CAUU  
||||| ||||| ||||  
ACCUCUUCGUCCCAUGCACGAGUAA 5'  
AT1G56010.1 773 797  
NAC1

SRNA\_AG01\_SoLexa\_Mi2008\_2\_13910\_hit1

5' GAGAAGCAGGGCACGUGCAU  
||||| ||||| :  
CUCUUCGUCCCAUGCACGAG 5'  
AT1G56010.1 775 794  
NAC1

SRNA\_AG01\_SoLexa\_Mi2008\_1\_14842\_hit1

5' GGAGAAGCAGGGCACGUGCAA  
||||| |||||  
CCUCUUCGUCCCAUGCACGAG 5'  
AT1G56010.1 775 795  
NAC1

SRNA\_AG01\_SoLexa\_Mi2008\_4\_14843\_hit1

5' GGAGAAGCAGGGCACGUGCAU  
||||| ||||| :  
CCUCUUCGUCCCAUGCACGAG 5'  
AT1G56010.1 775 795  
NAC1

flowers\_1sup\_AG01\_SoLexa\_Mi\_Cell\_2008\_hit\_target\_site.txt

SRNA\_AG01\_SoLexa\_Mi2008\_1\_14846\_hit1

5' GGAGAAGCAGGGCACGUGCGA  
|||||  
CCUCUUCGUCCCAUGCACGAG 5'  
AT1G56010.1 775 795  
NAC1

SRNA\_AG01\_SoLexa\_Mi2008\_3\_40196\_hit1

5' UGGAGAAGCAGGGCACGUGCAA  
|||||  
ACCUCUUCGUCCCAUGCACGAG 5'  
AT1G56010.1 775 796  
NAC1

SRNA\_AG01\_SoLexa\_Mi2008\_284\_40197\_hit1

5' UGGAGAAGCAGGGCACGUGCAU  
||||| :  
ACCUCUUCGUCCCAUGCACGAG 5'  
AT1G56010.1 775 796  
NAC1

SRNA\_AG01\_SoLexa\_Mi2008\_10440\_13909\_hit2

5' GAGAAGCAGGGCACGUGCA  
|||||  
CUCUUCGUCCCAUGCACGA 5'  
AT1G56010.1 776 794  
NAC1

SRNA\_AG01\_SoLexa\_Mi2008\_110\_13911\_hit1

5' GAGAAGCAGGGCACGUGCG  
|||||  
CUCUUCGUCCCAUGCACGA 5'  
AT1G56010.1 776 794  
NAC1

SRNA\_AG01\_SoLexa\_Mi2008\_41322\_14841\_hit2

5' GGAGAAGCAGGGCACGUGCA  
|||||  
CCUCUUCGUCCCAUGCACGA 5'  
AT1G56010.1 776 795  
NAC1

SRNA\_AG01\_SoLexa\_Mi2008\_422\_14845\_hit1

5' GGAGAAGCAGGGCACGUGCG  
|||||  
CCUCUUCGUCCCAUGCACGA 5'  
AT1G56010.1 776 795  
NAC1

SRNA\_AG01\_SoLexa\_Mi2008\_370931\_40195\_hit2

5' UGGAGAAGCAGGGCACGUGCA  
|||||  
ACCUCUUCGUCCCAUGCACGA 5'  
AT1G56010.1 776 796  
NAC1

SRNA\_AG01\_SoLexa\_Mi2008\_7589\_40199\_hit1

5' UGGAGAAGCAGGGCACGUGCG  
|||||  
ACCUCUUCGUCCCAUGCACGA 5'  
AT1G56010.1 776 796  
NAC1

flowers\_1sup\_AG01\_SoLexa\_Mi\_Cell\_2008\_hit\_target\_site.txt

SRNA\_AG01\_SoLexa\_Mi2008\_2\_40202\_hit1

5' UGGAGAAGCAGGGUACGUGCU  
|||||  
ACCUCUUCGUCCCAUGCACGA 5'  
AT1G56010.1 776 796  
NAC1

SRNA\_AG01\_SoLexa\_Mi2008\_1214\_3232\_hit1

5' AUGGAGAAGCAGGGCACGUGCA  
|||||  
AACCUCUUCGUCCCAUGCACGA 5'  
AT1G56010.1 776 797  
NAC1

SRNA\_AG01\_SoLexa\_Mi2008\_24\_3233\_hit1

5' AUGGAGAAGCAGGGCACGUGCG  
|||||  
AACCUCUUCGUCCCAUGCACGA 5'  
AT1G56010.1 776 797  
NAC1

SRNA\_AG01\_SoLexa\_Mi2008\_9\_52081\_hit1

5' UUGGAGAAGCAGGGCACGUGCA  
|||||  
AACCUCUUCGUCCCAUGCACGA 5'  
AT1G56010.1 776 797  
NAC1

SRNA\_AG01\_SoLexa\_Mi2008\_23\_14840\_hit3

5' GGAGAAGCAGGGCACGUGC  
|||||  
CCUCUUCGUCCCAUGCACG 5'  
AT1G56010.1 777 795  
NAC1

SRNA\_AG01\_SoLexa\_Mi2008\_1\_40190\_hit1

5' UGGAGAAGCAGGGCACGUAA  
|||||  
ACCUCUUCGUCCCAUGCACG 5'  
AT1G56010.1 777 796  
NAC1

SRNA\_AG01\_SoLexa\_Mi2008\_404\_40194\_hit3

5' UGGAGAAGCAGGGCACGUGC  
|||||  
ACCUCUUCGUCCCAUGCACG 5'  
AT1G56010.1 777 796  
NAC1

SRNA\_AG01\_SoLexa\_Mi2008\_2\_40201\_hit1

5' UGGAGAAGCAGGGUACGUGC  
|||||  
ACCUCUUCGUCCCAUGCACG 5'  
AT1G56010.1 777 796  
NAC1

SRNA\_AG01\_SoLexa\_Mi2008\_9\_40189\_hit2

5' UGGAGAAGCAGGGCACGUA  
|||||  
ACCUCUUCGUCCCAUGCAC 5'  
AT1G56010.1 778 796  
NAC1

flowers\_1sup\_AG01\_SoLexa\_Mi\_Cell\_2008\_hit\_target\_site.txt

SRNA\_AG01\_SoLexa\_Mi2008\_366\_40193\_hit3

5' UGGAGAAGCAGGGCACGUG  
|||||  
ACCUCUUCGUCCCAUGCAC 5'  
AT1G56010.1 778 796  
NAC1

SRNA\_AG01\_SoLexa\_Mi2008\_1\_40200\_hit1

5' UGGAGAAGCAGGGUACGUG  
|||||  
ACCUCUUCGUCCCAUGCAC 5'  
AT1G56010.1 778 796  
NAC1

SRNA\_AG01\_SoLexa\_Mi2008\_2\_3231\_hit2

5' AUGGAGAAGCAGGGCACGUG  
|||||  
AACCUCUUCGUCCCAUGCAC 5'  
AT1G56010.1 778 797  
NAC1

SRNA\_AG01\_SoLexa\_Mi2008\_1\_13477\_hit1

5' GAAGCAGGGCACGUG--CAUU  
|||||  
CUUCGUCCCAUGCACGAGUAA 5'  
AT1G56010.2 798 818  
NAC1

SRNA\_AG01\_SoLexa\_Mi2008\_2\_14844\_hit1

5' GGAGAAGCAGGGCACGUG--CAUU  
|||||  
CCUCUUCGUCCCAUGCACGAGUAA 5'  
AT1G56010.2 798 821  
NAC1

SRNA\_AG01\_SoLexa\_Mi2008\_91\_40198\_hit1

5' UGGAGAAGCAGGGCACGUG--CAUU  
|||||  
ACCUCUUCGUCCCAUGCACGAGUAA 5'  
AT1G56010.2 798 822  
NAC1

SRNA\_AG01\_SoLexa\_Mi2008\_2\_13910\_hit1

5' GAGAAGCAGGGCACGUGCAU  
||||| :  
CUCUUCGUCCCAUGCACGAG 5'  
AT1G56010.2 800 819  
NAC1

SRNA\_AG01\_SoLexa\_Mi2008\_1\_14842\_hit1

5' GGAGAAGCAGGGCACGUGCAA  
|||||  
CCUCUUCGUCCCAUGCACGAG 5'  
AT1G56010.2 800 820  
NAC1

SRNA\_AG01\_SoLexa\_Mi2008\_4\_14843\_hit1

5' GGAGAAGCAGGGCACGUGCAU  
||||| :  
CCUCUUCGUCCCAUGCACGAG 5'  
AT1G56010.2 800 820  
NAC1

flowers\_1sup\_AG01\_SoLexa\_Mi\_Cell\_2008\_hit\_target\_site.txt

SRNA\_AG01\_SoLexa\_Mi2008\_1\_14846\_hit1

```
5' GGAGAAGCAGGGCACGUGCGA
   |||
   CCUCUUCGUCCCAUGCACGAG 5'
AT1G56010.2      800      820
NAC1
```

SRNA\_AG01\_SoLexa\_Mi2008\_3\_40196\_hit1

```
5' UGGAGAAGCAGGGCACGUGCAA
   |||
   ACCUCUUCGUCCCAUGCACGAG 5'
AT1G56010.2      800      821
NAC1
```

SRNA\_AG01\_SoLexa\_Mi2008\_284\_40197\_hit1

```
5' UGGAGAAGCAGGGCACGUGCAU
   |||
   ACCUCUUCGUCCCAUGCACGAG 5'
AT1G56010.2      800      821
NAC1
```

SRNA\_AG01\_SoLexa\_Mi2008\_10440\_13909\_hit2

```
5' GAGAAGCAGGGCACGUGCA
   |||
   CUCUUCGUCCCAUGCACGA 5'
AT1G56010.2      801      819
NAC1
```

SRNA\_AG01\_SoLexa\_Mi2008\_110\_13911\_hit1

```
5' GAGAAGCAGGGCACGUGCG
   |||
   CUCUUCGUCCCAUGCACGA 5'
AT1G56010.2      801      819
NAC1
```

SRNA\_AG01\_SoLexa\_Mi2008\_41322\_14841\_hit2

```
5' GGAGAAGCAGGGCACGUGCA
   |||
   CCUCUUCGUCCCAUGCACGA 5'
AT1G56010.2      801      820
NAC1
```

SRNA\_AG01\_SoLexa\_Mi2008\_422\_14845\_hit1

```
5' GGAGAAGCAGGGCACGUGCG
   |||
   CCUCUUCGUCCCAUGCACGA 5'
AT1G56010.2      801      820
NAC1
```

SRNA\_AG01\_SoLexa\_Mi2008\_370931\_40195\_hit2

```
5' UGGAGAAGCAGGGCACGUGCA
   |||
   ACCUCUUCGUCCCAUGCACGA 5'
AT1G56010.2      801      821
NAC1
```

SRNA\_AG01\_SoLexa\_Mi2008\_7589\_40199\_hit1

```
5' UGGAGAAGCAGGGCACGUGCG
   |||
   ACCUCUUCGUCCCAUGCACGA 5'
AT1G56010.2      801      821
NAC1
```

flowers\_1sup\_AG01\_SoLexa\_Mi\_Cell\_2008\_hit\_target\_site.txt

SRNA\_AG01\_SoLexa\_Mi2008\_2\_40202\_hit1

5' UGGAGAAGCAGGGUACGUGCU  
|||||  
ACCUCUUCGUCCCAUGCACGA 5'  
AT1G56010.2 801 821  
NAC1

SRNA\_AG01\_SoLexa\_Mi2008\_1214\_3232\_hit1

5' AUGGAGAAGCAGGGCACGUGCA  
|||||  
AACCUCUUCGUCCCAUGCACGA 5'  
AT1G56010.2 801 822  
NAC1

SRNA\_AG01\_SoLexa\_Mi2008\_24\_3233\_hit1

5' AUGGAGAAGCAGGGCACGUGCG  
|||||  
AACCUCUUCGUCCCAUGCACGA 5'  
AT1G56010.2 801 822  
NAC1

SRNA\_AG01\_SoLexa\_Mi2008\_9\_52081\_hit1

5' UUGGAGAAGCAGGGCACGUGCA  
|||||  
AACCUCUUCGUCCCAUGCACGA 5'  
AT1G56010.2 801 822  
NAC1

SRNA\_AG01\_SoLexa\_Mi2008\_23\_14840\_hit3

5' GGAGAAGCAGGGCACGUGC  
|||||  
CCUCUUCGUCCCAUGCACG 5'  
AT1G56010.2 802 820  
NAC1

SRNA\_AG01\_SoLexa\_Mi2008\_1\_40190\_hit1

5' UGGAGAAGCAGGGCACGUAA  
|||||  
ACCUCUUCGUCCCAUGCACG 5'  
AT1G56010.2 802 821  
NAC1

SRNA\_AG01\_SoLexa\_Mi2008\_404\_40194\_hit3

5' UGGAGAAGCAGGGCACGUGC  
|||||  
ACCUCUUCGUCCCAUGCACG 5'  
AT1G56010.2 802 821  
NAC1

SRNA\_AG01\_SoLexa\_Mi2008\_2\_40201\_hit1

5' UGGAGAAGCAGGGUACGUGC  
|||||  
ACCUCUUCGUCCCAUGCACG 5'  
AT1G56010.2 802 821  
NAC1

SRNA\_AG01\_SoLexa\_Mi2008\_9\_40189\_hit2

5' UGGAGAAGCAGGGCACGUA  
|||||  
ACCUCUUCGUCCCAUGCAC 5'  
AT1G56010.2 803 821  
NAC1

flowers\_1sup\_AG01\_SoLexa\_Mi\_Cell\_2008\_hit\_target\_site.txt

SRNA\_AG01\_SoLexa\_Mi2008\_366\_40193\_hit3

```
5' UGGAGAAGCAGGGCACGUG
   |||
   ACCUCUUCGUCCCAUGCAC 5'
AT1G56010.2      803      821
NAC1
```

SRNA\_AG01\_SoLexa\_Mi2008\_1\_40200\_hit1

```
5' UGGAGAAGCAGGGUACGUG
   |||
   ACCUCUUCGUCCCAUGCAC 5'
AT1G56010.2      803      821
NAC1
```

SRNA\_AG01\_SoLexa\_Mi2008\_2\_3231\_hit2

```
5' AUGGAGAAGCAGGGCACGUG
   |||
   AACCUCUUCGUCCCAUGCAC 5'
AT1G56010.2      803      822
NAC1
```

SRNA\_AG01\_SoLexa\_Mi2008\_1\_21205\_hit1

```
5' UAGAGACGAUUGAUAAAGAGUA
   |||
   UUCUCUGCUAACUACUCUCAU 5'
AT1G58270.1     1171     1191
unknown protein
```

SRNA\_AG01\_SoLexa\_Mi2008\_2\_5090\_hit1

```
5' CAAUAGGUGAAAUCAUAGAUU
   |||
   GUUAUACACUUUAG--UCUAA 5'
AT1G58270.1     1335     1353
unknown protein
```

SRNA\_AG01\_SoLexa\_Mi2008\_1\_2\_hit38

```
5' AAAAAAAAAAAAAACCAU
   |||
   GUUUUUUUUUUUUUUUUGUA 5'
AT1G58270.1     1392     1410
unknown protein
```

SRNA\_AG01\_SoLexa\_Mi2008\_7\_14756\_hit2

```
5' GCUACCUU-AAGAGAGUCA-UAG
   | |||
   CCAUGGAAAUUCUCUCAGUUAUC 5'
AT1G58340.1      972      994
putative protein
```

SRNA\_AG01\_SoLexa\_Mi2008\_9\_2828\_hit2

```
5' AUCCAGCGCACGGUAGCUU
   |||
   UAGGCCGCGUGCCAUCGUU 5'
AT1G58360.1      368      386
unknown protein
```

SRNA\_AG01\_SoLexa\_Mi2008\_1\_172\_hit2

```
5' AA-AAGAAGAAGAUAAAGCA
   ||
   UUGUUCUUCUUCUAAUUUUU 5'
AT1G58360.1      49       68
unknown protein
```

flowers\_1sup\_AG01\_SoLexa\_Mi\_Cell\_2008\_hit\_target\_site.txt

SRNA\_AG01\_SoLexa\_Mi2008\_2\_6628\_hit1

5' CAGGUGAUGGUGUAAUCAA  
||| |||||:|||  
GUC-ACUACCACAUUGGUU 5'  
AT1G58360.1 503 520  
unknown protein

SRNA\_AG01\_SoLexa\_Mi2008\_1\_14\_hit1

5' AAA-A-AAACAGAGAACAAGAAGA  
||| | ||| |||||  
UUUCUCUUUCUCUCUUGUUCUUCU 5'  
AT1G58360.1 59 82  
unknown protein

SRNA\_AG01\_SoLexa\_Mi2008\_3\_35894\_hit1

5' UGAGAGCA-GAGAAAGAGAGU  
||| ||| | |||||  
ACUCUCUUUCUCUUUCUCUCU 5'  
AT1G58360.1 68 88  
unknown protein

SRNA\_AG01\_SoLexa\_Mi2008\_1\_35311\_hit3

5' UGAC-AUGAUGUUGAUGUGCAUA  
||| ||||| ||||| ||  
ACUGGUACUACAACUACAC-UAC 5'  
AT1G62360.1 104 125  
homeobox transcription factor shootmeristemless (stm)

SRNA\_AG01\_SoLexa\_Mi2008\_1\_35310\_hit3

5' UGAC-AUGAUGUUGAUGUGCA  
||| ||||| ||||| ||  
ACUGGUACUACAACUACACUA 5'  
AT1G62360.1 105 125  
homeobox transcription factor shootmeristemless (stm)

SRNA\_AG01\_SoLexa\_Mi2008\_1\_2990\_hit3

5' AUGAC-AUGAUGUUGAUGUGCAU  
||| ||||| ||||| ||  
UACUGGUACUACAACUACAC-UA 5'  
AT1G62360.1 105 126  
homeobox transcription factor shootmeristemless (stm)

SRNA\_AG01\_SoLexa\_Mi2008\_2\_7102\_hit1

5' CAUGAACAUUGAUGAUG-GA  
||| ||||| ||||| ||  
GUACUGGUACUACAACUACACU 5'  
AT1G62360.1 106 127  
homeobox transcription factor shootmeristemless (stm)

SRNA\_AG01\_SoLexa\_Mi2008\_2\_13419\_hit2

5' GAAGAAGAAGAAG-ACACUU  
||| ||||| | |||  
CUUCUUCUUCUUCGU-UGAA 5'  
AT1G62360.1 239 257  
homeobox transcription factor shootmeristemless (stm)

SRNA\_AG01\_SoLexa\_Mi2008\_4\_26725\_hit129

5' UCAAAGCUUCA-UGGUGUAGC  
||| ||||| |:| |||  
AGUUUCGAAAGUUAUCAAUCG 5'  
AT1G62540.1 1547 1568  
unknown protein

flowers\_1sup\_AG01\_SoIexa\_Mi\_Cell\_2008\_hit\_target\_site.txt

SRNA\_AG01\_SoIexa\_Mi2008\_1\_3891\_hit1

```
5' CAAAACCAAGGAUGAUAAA
    ||||| ||||| ||||| |||
    GUUUUGCUCUCCUACU-UUU 5'
AT1G62570.1    1421    1440
similar to glutamate synthase
```

SRNA\_AG01\_SoIexa\_Mi2008\_3\_21212\_hit1

```
5' UAGAGAGAGAAAAAGAUGGC
    ||||| ||||| ||| |||
    AUCUCUCUCUUUCUCU-CCG 5'
AT1G62710.1    26      44
beta-VPE
```

SRNA\_AG01\_SoIexa\_Mi2008\_30\_14853\_hit1

```
5' GGAGAGAGCAAAGUUGAGA
    | ||||| ||||| |||
    CGUCUCUCGUUUCAAACU 5'
AT1G63010.1    190     208
tetracycline resistance efflux protein like protein
```

SRNA\_AG01\_SoIexa\_Mi2008\_30\_14853\_hit1

```
5' GGAGAGAGCAAAGUUGAGA
    | ||||| ||||| |||
    CGUCUCUCGUUUCAAACU 5'
AT1G63010.4    310     328
tetracycline resistance efflux protein like protein
```

SRNA\_AG01\_SoIexa\_Mi2008\_30\_14853\_hit1

```
5' GGAGAGAGCAAAGUUGAGA
    | ||||| ||||| |||
    CGUCUCUCGUUUCAAACU 5'
AT1G63010.2    409     427
tetracycline resistance efflux protein like protein
```

SRNA\_AG01\_SoIexa\_Mi2008\_30\_14853\_hit1

```
5' GGAGAGAGCAAAGUUGAGA
    | ||||| ||||| |||
    CGUCUCUCGUUUCAAACU 5'
AT1G63010.3    410     428
tetracycline resistance efflux protein like protein
```

SRNA\_AG01\_SoIexa\_Mi2008\_1\_43726\_hit3

```
5' UGGUUAAGGAGAUAGACUUGA
    ||||| ||||| |||
    ACCAAUUCUAUCUAUCU--ACU 5'
AT1G63720.1    683     701
unknown protein
```

SRNA\_AG01\_SoIexa\_Mi2008\_1\_50002\_hit1

```
5' UUGAACAUUGUGGUG-UGAGUG
    ||||| ||||| | |||||
    AACUUGUACACCUCUACUCAA 5'
AT1G63840.1    399     420
putative RING zinc finger protein
```

SRNA\_AG01\_SoIexa\_Mi2008\_1\_3384\_hit1

```
5' AUGGUGAAGAUUUUCUAGU
    ||||| ||||| |||||
    CACCACUACUACAAAGAUCU 5'
AT1G63840.1    73      92
putative RING zinc finger protein
```

flowers\_1sup\_AG01\_SoLexa\_Mi\_Cell\_2008\_hit\_target\_site.txt

SRNA\_AG01\_SoLexa\_Mi2008\_1\_27754\_hit1

5' UCACCUCAUGAUGAACUUGGA  
      |||| | |||  
      CGUGGUG-ACUACUUGAACCU 5'

AT1G64660.1      798      817  
similar to O-succinylhomoserine sulfhydrylase

SRNA\_AG01\_SoLexa\_Mi2008\_3\_13421\_hit1

5' GAAGAAGAAGAUUGUUGAU  
      :|||||  
      UUUCUUCUUCUACUACUACU 5'

AT1G66090.1      101      121  
unknown protein

SRNA\_AG01\_SoLexa\_Mi2008\_6\_29484\_hit1

5' UCCAGGACCAAACCACGUUGU  
      |||||  
      AGGUCCUGGUAUGGUG-AACU 5'

AT1G66090.1      1049      1068  
unknown protein

SRNA\_AG01\_SoLexa\_Mi2008\_1\_48999\_hit1

5' UCCAGGACCAAACCACGUUG  
      |||||  
      AAGGUCCUGGUAUGGUG-AAC 5'

AT1G66090.1      1050      1069  
unknown protein

SRNA\_AG01\_SoLexa\_Mi2008\_1\_1763\_hit2

5' ACUCCAGGACCAAACCACGU  
      |||||  
      UGAAGGUCCUGGUAUGGUGAA 5'

AT1G66090.1      1050      1070  
unknown protein

SRNA\_AG01\_SoLexa\_Mi2008\_26\_20692\_hit2

5' UACUCCAGGACCAAACCACGU  
      |||||  
      AUGAAGGUCCUGGUAUGGUGAA 5'

AT1G66090.1      1050      1071  
unknown protein

SRNA\_AG01\_SoLexa\_Mi2008\_12\_20691\_hit2

5' UACUCCAGGACCAAACCACG  
      |||||  
      AUGAAGGUCCUGGUAUGGUGA 5'

AT1G66090.1      1051      1071  
unknown protein

SRNA\_AG01\_SoLexa\_Mi2008\_2\_8245\_hit1

5' CGA-AAAGAAGAAGAUUGAG  
      || |||  
      ACUAAUUCUUCUUCUACUACUA 5'

AT1G66090.1      105      126  
unknown protein

SRNA\_AG01\_SoLexa\_Mi2008\_1\_24884\_hit1

5' UAUCAGGUGCAGAGCUUUGUC  
      :|||||  
      GUAGUCCACCUCUCCAAACAG 5'

AT1G66090.1      1192      1212  
unknown protein

flowers\_1sup\_AG01\_SoLexa\_Mi\_Cell\_2008\_hit\_target\_site.txt

SRNA\_AG01\_SoLexa\_Mi2008\_1\_48406\_hit1

5' UUCAAAAUACACAAGUUC-AAA  
||| ||| ||||| |||  
AAGUAAUAUCUGUUCAAGAUUU 5'  
AT1G66090.1 1518 1539  
unknown protein

SRNA\_AG01\_SoLexa\_Mi2008\_3\_27133\_hit1

5' UCAAG-CACCAGCUCGAAGAAGC  
||||| ||||| |||||  
AGUUCUGUGGUCGAGCUACUUCG 5'  
AT1G66090.1 346 368  
unknown protein

SRNA\_AG01\_SoLexa\_Mi2008\_1\_27132\_hit1

5' UCAAG-CACCAGCUCGAAGAAG  
||||| ||||| |||||  
AGUUCUGUGGUCGAGCUACUUC 5'  
AT1G66090.1 347 368  
unknown protein

SRNA\_AG01\_SoLexa\_Mi2008\_1\_48406\_hit1

5' UUCAAAAUACACAAGUUCAAA  
||||| ||| |||||  
AAGUUUAUGU-CU-AAGUUU 5'  
AT1G66090.1 50 68  
unknown protein

SRNA\_AG01\_SoLexa\_Mi2008\_3\_39171\_hit1

5' UGCUAGAGAGUAGGCUU-UGU  
||||| ||||| |||||  
ACGAUCUCUCAUCC-AAUACA 5'  
AT1G66090.1 795 814  
unknown protein

SRNA\_AG01\_SoLexa\_Mi2008\_1\_34620\_hit1

5' UGAAGAUGAUGAUGAAGUU  
||||| ||||| |||||  
UCUUCUACUACUACUUCUU 5'  
AT1G66090.1 98 116  
unknown protein

SRNA\_AG01\_SoLexa\_Mi2008\_1\_2360\_hit1

5' AUAACAAGUCCUGUUGGGUC  
| ||||| |||||  
UCUUGUUCAGGAAAACCCAG 5'  
AT1G68550.1 319 338  
putative AP2 domain transcription factor

SRNA\_AG01\_SoLexa\_Mi2008\_1\_2360\_hit1

5' AUAACAAGUCCUGUUGGGUC  
| ||||| |||||  
UCUUGUUCAGGAAAACCCAG 5'  
AT1G68550.2 329 348  
putative AP2 domain transcription factor

SRNA\_AG01\_SoLexa\_Mi2008\_1\_20838\_hit1

5' UAGAACCAAUUUUUUUUGAA  
|| ||| ||||| |||||  
AU-UUGC UUAUAAAUAACUA 5'  
AT1G68620.1 1274 1293  
putative carboxylesterase

flowers\_1sup\_AG01\_SoLexa\_Mi\_Cell\_2008\_hit\_target\_site.txt

SRNA\_AG01\_SoLexa\_Mi2008\_1\_4194\_hit1

```
5' CAAAGGUGUG-AUCAGGAUGGU
  ||||| || |||||
  GUUCCA-ACCUAGUCCUACCA 5'
AT1G68620.1    675    695
putative carboxylesterase
```

SRNA\_AG01\_SoLexa\_Mi2008\_1\_18801\_hit1

```
5' UAAUGGAGUUG-AUCACAUGA
  ||||| | |||||
  AUUACCUCA-CGUAGUGUACU 5'
AT1G68875.1    301    320
```

SRNA\_AG01\_SoLexa\_Mi2008\_4\_21672\_hit1

```
5' UAGAGUUGGGUAGAUAGCUU
  :||| ||| |||
  GUCUCAACCCAUAC-AU-GAA 5'
AT1G69180.1    582    600
transcription factor CRC
```

SRNA\_AG01\_SoLexa\_Mi2008\_2\_7120\_hit1

```
5' CAUGAAUUUGAGGUUACAG
  ||||| |||||:||| |||
  GUACUUAAACUCUAAA-GUC 5'
AT1G69410.1    56    74
eukaryotic initiation factor 5A (eIF-5A) like protein
```

SRNA\_AG01\_SoLexa\_Mi2008\_1\_24278\_hit24

```
5' UA-UAAGGAGGAGACAAUCGAG
  || ||||| ||||| |||:
  AUCAUCCUCCUCUGUUCGCUU 5'
AT1G69450.1    1205   1226
hypothetical protein
```

SRNA\_AG01\_SoLexa\_Mi2008\_1\_55724\_hit1

```
5' UUUGGAGUUACGACUUUGA
  :||| || |||||
  GAACC-UCCAUGCUGAAACU 5'
AT1G69450.1    1380   1398
hypothetical protein
```

SRNA\_AG01\_SoLexa\_Mi2008\_2\_36326\_hit1

```
5' UGAGGAUGAUGGAUUU-AGAUC
  || ||||| || |||||
  ACUGCUACUACC-AAAUUCUAG 5'
AT1G69490.1    862    882
unknown protein
```

SRNA\_AG01\_SoLexa\_Mi2008\_8\_15630\_hit1

```
5' GUCAUGGAAUAAGCUUGUUGG
  ||||| |||||
  AAGUACCUUCGUCGAACAACC 5'
AT1G69850.1    1171   1191
nitrate transporter (NTL1)
```

SRNA\_AG01\_SoLexa\_Mi2008\_1\_22549\_hit1

```
5' UAGCUUCUUGAACCAGUUGAU
  ||||| |||||
  AUCGAAGAACUUGGUCAACUA 5'
AT1G69850.1    1801   1821
nitrate transporter (NTL1)
```

SRNA\_AG01\_SoLexa\_Mi2008\_1\_1110\_hit1

flowers\_1sup\_AG01\_SoLexa\_Mi\_Cell\_2008\_hit\_target\_site.txt

5' AAUGCUCAGGUCGAGGUGGUCC  
||| |||||  
UUA-GAGUCCAGCUCCAC-AGG 5'  
AT1G69880.1 129 148  
thioredoxin like protein

SRNA\_AG01\_SoLexa\_Mi2008\_1\_1109\_hit1  
5' AAUGCUCAGGUCGAGGUGGUCC  
||| |||||  
UUA-GAGUCCAGCUCCAC-AG 5'  
AT1G69880.1 130 148  
thioredoxin like protein

SRNA\_AG01\_SoLexa\_Mi2008\_1\_20843\_hit2  
5' UAGAACCGUGAUUGCUCUGA  
||| |||||  
AUCUUGGCUCUAACGAG-CU 5'  
AT1G71200.1 501 519  
hypothetical protein

SRNA\_AG01\_SoLexa\_Mi2008\_1\_45596\_hit2  
5' UGUGUACA-GGCUAAGAUCUGG  
||| | |||||  
CCACAU-UACCGAUUCUAGACC 5'  
AT1G72070.1 206 226  
hypothetical protein

SRNA\_AG01\_SoLexa\_Mi2008\_1\_51229\_hit14  
5' UUGAUUUAUUGGAGGGUUUAGU  
||| |||||  
AACUAAAAACCUCCC--AUCA 5'  
AT1G72520.1 1291 1309  
putative lipoxygenase

SRNA\_AG01\_SoLexa\_Mi2008\_1\_20232\_hit22  
5' UACCGAUUAGCCAUCAGAGUG  
||| |||||  
AUGCCAAUUCGGUAGU-UCAA 5'  
AT1G72520.1 1523 1542  
putative lipoxygenase

SRNA\_AG01\_SoLexa\_Mi2008\_2\_51167\_hit1  
5' UUGAUGGAGGAUUGUGUUC-CU  
||| |||||:|:|||||  
AACUACCUCUUGACACAAGAGA 5'  
AT1G72520.1 200 221  
putative lipoxygenase

SRNA\_AG01\_SoLexa\_Mi2008\_11\_14524\_hit19  
5' GCCAUUUGUUCUUGAGUAG  
||| |||||  
CGGUAAACAAGAA-U-AUG 5'  
AT1G72520.1 2064 2080  
putative lipoxygenase

SRNA\_AG01\_SoLexa\_Mi2008\_1\_4981\_hit1  
5' CAAGUA-UUUAAGCCCAUUUA  
||| |||||  
GUUCAUUAAAUCGGGUACAC 5'  
AT1G72520.1 2150 2170  
putative lipoxygenase

SRNA\_AG01\_SoLexa\_Mi2008\_1\_20416\_hit2

5' UACGUUGAUGUAUUGGUCA  
 || |||||  
 AU-CAACUACUAUACCAUC 5'  
 AT1G72520.1 63 80  
 putative lipoxygenase

SRNA\_AG01\_SoLexa\_Mi2008\_1\_54673\_hit1  
 5' UUUCAAGUG-GUCCAAACAUAUCAG  
 ||||| ||| ||||| |||||  
 AAAGU-CACACAGGUUUCUAUAGUC 5'  
 AT1G72830.3 1238 1261  
 unknown protein

SRNA\_AG01\_SoLexa\_Mi2008\_1\_54673\_hit1  
 5' UUUCAAGUG-GUCCAAACAUAUCAG  
 ||||| ||| ||||| |||||  
 AAAGU-CACACAGGUUUCUAUAGUC 5'  
 AT1G72830.1 1314 1337  
 unknown protein

SRNA\_AG01\_SoLexa\_Mi2008\_1\_54673\_hit1  
 5' UUUCAAGUG-GUCCAAACAUAUCAG  
 ||||| ||| ||||| |||||  
 AAAGU-CACACAGGUUUCUAUAGUC 5'  
 AT1G72830.2 1317 1340  
 unknown protein

SRNA\_AG01\_SoLexa\_Mi2008\_17\_12252\_hit1  
 5' CUGUGGUGGAACAUGAACUC  
 || |||||  
 GA-ACCACCCUUGUACUUGUG 5'  
 AT1G72830.3 1391 1410  
 unknown protein

SRNA\_AG01\_SoLexa\_Mi2008\_26\_14509\_hit4  
 5' GCCAAGGAUGACUUGCCGG  
 |||||  
 CGGUUCCUACUGAA-GGGG 5'  
 AT1G72830.3 1413 1430  
 unknown protein

SRNA\_AG01\_SoLexa\_Mi2008\_4\_2048\_hit4  
 5' AGCCAAGGAUGACUUGCCGG  
 |||||  
 UCGGUUCCUACUGAA-GGGG 5'  
 AT1G72830.3 1413 1431  
 unknown protein

SRNA\_AG01\_SoLexa\_Mi2008\_400\_22176\_hit7  
 5' UAGCCAAGGAUGACUUGCCUG  
 |||||  
 AUCGGUUCCUACUGAA-GGGG 5'  
 AT1G72830.3 1413 1432  
 unknown protein

SRNA\_AG01\_SoLexa\_Mi2008\_2\_15465\_hit6  
 5' GUAGCCAAGGAUGACUUGCCUG  
 |||||  
 CAUCGGUUCCUACUGAA-GGGG 5'  
 AT1G72830.3 1413 1433  
 unknown protein

SRNA\_AG01\_SoLexa\_Mi2008\_78\_6282\_hit3

5' CAGCCAAGGAUGACUUGCCG  
|||||  
UUCGGUCCUACUGAA-GGG 5'  
AT1G72830.3 1414 1432  
unknown protein

SRNA\_AG01\_SoLexa\_Mi2008\_9\_22175\_hit7  
5' UAGCCAAGGAUGACUUGCCU  
|||||  
AUCGGUCCUACUGAA-GGG 5'  
AT1G72830.3 1414 1432  
unknown protein

SRNA\_AG01\_SoLexa\_Mi2008\_20\_6281\_hit3  
5' CAGCCAAGGAUGACUUGCC  
|||||  
UUCGGUCCUACUGAA-GG 5'  
AT1G72830.3 1415 1432  
unknown protein

SRNA\_AG01\_SoLexa\_Mi2008\_7\_22174\_hit7  
5' UAGCCAAGGAUGACUUGCC  
|||||  
AUCGGUCCUACUGAA-GG 5'  
AT1G72830.3 1415 1432  
unknown protein

SRNA\_AG01\_SoLexa\_Mi2008\_1\_28302\_hit1  
5' UCAGCCAAGGAUGACUUGCC  
: |||||  
GUUCGGUCCUACUGAA-GG 5'  
AT1G72830.3 1415 1433  
unknown protein

SRNA\_AG01\_SoLexa\_Mi2008\_4\_36086\_hit4  
5' UGAGCCAAGGAUGACUUGCC  
:: |||||  
GUUCGGUCCUACUGAA-GG 5'  
AT1G72830.3 1415 1433  
unknown protein

SRNA\_AG01\_SoLexa\_Mi2008\_17\_12252\_hit1  
5' CUGUGGUGGGAACAUGAACUC  
|| |||||  
GA-ACCACCCUUGUACUUGUG 5'  
AT1G72830.1 1467 1486  
unknown protein

SRNA\_AG01\_SoLexa\_Mi2008\_17\_12252\_hit1  
5' CUGUGGUGGGAACAUGAACUC  
|| |||||  
GA-ACCACCCUUGUACUUGUG 5'  
AT1G72830.2 1470 1489  
unknown protein

SRNA\_AG01\_SoLexa\_Mi2008\_26\_14509\_hit4  
5' GCCAAGGAUGACUUGCCGG  
|||||  
CGGUCCUACUGAA-GGGG 5'  
AT1G72830.1 1489 1506  
unknown protein

SRNA\_AG01\_SoLexa\_Mi2008\_4\_2048\_hit4

5' AGCCAAGGAUGACUUGCCGG  
|||||  
UCGGUCCUACUGAA-GGGG 5'  
AT1G72830.1 1489 1507  
unknown protein

SRNA\_AG01\_SoLexa\_Mi2008\_400\_22176\_hit7  
5' UAGCCAAGGAUGACUUGCCUG  
|||||  
AUCGGUCCUACUGAA-GGGG 5'  
AT1G72830.1 1489 1508  
unknown protein

SRNA\_AG01\_SoLexa\_Mi2008\_2\_15465\_hit6  
5' GUAGCCAAGGAUGACUUGCCUG  
|||||  
CAUCGGUCCUACUGAA-GGGG 5'  
AT1G72830.1 1489 1509  
unknown protein

SRNA\_AG01\_SoLexa\_Mi2008\_78\_6282\_hit3  
5' CAGCCAAGGAUGACUUGCCG  
|||||  
UUCGGUCCUACUGAA-GGG 5'  
AT1G72830.1 1490 1508  
unknown protein

SRNA\_AG01\_SoLexa\_Mi2008\_9\_22175\_hit7  
5' UAGCCAAGGAUGACUUGCCU  
|||||  
AUCGGUCCUACUGAA-GGG 5'  
AT1G72830.1 1490 1508  
unknown protein

SRNA\_AG01\_SoLexa\_Mi2008\_20\_6281\_hit3  
5' CAGCCAAGGAUGACUUGCC  
|||||  
UUCGGUCCUACUGAA-GG 5'  
AT1G72830.1 1491 1508  
unknown protein

SRNA\_AG01\_SoLexa\_Mi2008\_7\_22174\_hit7  
5' UAGCCAAGGAUGACUUGCC  
|||||  
AUCGGUCCUACUGAA-GG 5'  
AT1G72830.1 1491 1508  
unknown protein

SRNA\_AG01\_SoLexa\_Mi2008\_1\_28302\_hit1  
5' UCAGCCAAGGAUGACUUGCC  
: |||||  
GUUCGGUCCUACUGAA-GG 5'  
AT1G72830.1 1491 1509  
unknown protein

SRNA\_AG01\_SoLexa\_Mi2008\_4\_36086\_hit4  
5' UGAGCCAAGGAUGACUUGCC  
:: |||||  
GUUCGGUCCUACUGAA-GG 5'  
AT1G72830.1 1491 1509  
unknown protein

SRNA\_AG01\_SoLexa\_Mi2008\_26\_14509\_hit4

flowers\_1sup\_AG01\_SoLexa\_Mi\_Cell\_2008\_hit\_target\_site.txt

5' GCCAAGGAUGACUUGCCGG  
|||||  
CGGUUCCUACUGAA-GGGG 5'  
AT1G72830.2 1492 1509  
unknown protein

SRNA\_AG01\_SoLexa\_Mi2008\_4\_2048\_hit4  
5' AGCCAAGGAUGACUUGCCGG  
|||||  
UCGGUCCUACUGAA-GGGG 5'  
AT1G72830.2 1492 1510  
unknown protein

SRNA\_AG01\_SoLexa\_Mi2008\_400\_22176\_hit7  
5' UAGCCAAGGAUGACUUGCCUG  
|||||  
AUCGGUCCUACUGAA-GGGG 5'  
AT1G72830.2 1492 1511  
unknown protein

SRNA\_AG01\_SoLexa\_Mi2008\_2\_15465\_hit6  
5' GUAGCCAAGGAUGACUUGCCUG  
|||||  
CAUCGGUCCUACUGAA-GGGG 5'  
AT1G72830.2 1492 1512  
unknown protein

SRNA\_AG01\_SoLexa\_Mi2008\_78\_6282\_hit3  
5' CAGCCAAGGAUGACUUGCCG  
|||||  
UUCGGUCCUACUGAA-GGG 5'  
AT1G72830.2 1493 1511  
unknown protein

SRNA\_AG01\_SoLexa\_Mi2008\_9\_22175\_hit7  
5' UAGCCAAGGAUGACUUGCCU  
|||||  
AUCGGUCCUACUGAA-GGG 5'  
AT1G72830.2 1493 1511  
unknown protein

SRNA\_AG01\_SoLexa\_Mi2008\_20\_6281\_hit3  
5' CAGCCAAGGAUGACUUGCC  
|||||  
UUCGGUCCUACUGAA-GG 5'  
AT1G72830.2 1494 1511  
unknown protein

SRNA\_AG01\_SoLexa\_Mi2008\_7\_22174\_hit7  
5' UAGCCAAGGAUGACUUGCC  
|||||  
AUCGGUCCUACUGAA-GG 5'  
AT1G72830.2 1494 1511  
unknown protein

SRNA\_AG01\_SoLexa\_Mi2008\_1\_28302\_hit1  
5' UCAGCCAAGGAUGACUUGCC  
: |||||  
GUUCGGUCCUACUGAA-GG 5'  
AT1G72830.2 1494 1512  
unknown protein

SRNA\_AG01\_SoLexa\_Mi2008\_4\_36086\_hit4

flowers\_1sup\_AG01\_SoLexa\_Mi\_Cell\_2008\_hit\_target\_site.txt

5' UGAGCCAAGGAUGACUUGCC  
::| | | | | | | | | | | | | | | | | |  
GUUCGGUCCUACUGAA-GG 5'  
AT1G72830.2 1494 1512  
unknown protein

SRNA\_AG01\_SoLexa\_Mi2008\_5\_24767\_hit1  
5' UAUCAAAAGAAUCAU-UGCACU  
| | | | | | | | | | | | | | | | | |  
AUAGUCUUCUAGUUA-GUGA 5'  
AT1G72830.3 1579 1599  
unknown protein

SRNA\_AG01\_SoLexa\_Mi2008\_5\_24767\_hit1  
5' UAUCAAAAGAAUCAU-UGCACU  
| | | | | | | | | | | | | | | | | |  
AUAGUCUUCUAGUUA-GUGA 5'  
AT1G72830.1 1655 1675  
unknown protein

SRNA\_AG01\_SoLexa\_Mi2008\_5\_24767\_hit1  
5' UAUCAAAAGAAUCAU-UGCACU  
| | | | | | | | | | | | | | | | | |  
AUAGUCUUCUAGUUA-GUGA 5'  
AT1G72830.2 1658 1678  
unknown protein

SRNA\_AG01\_SoLexa\_Mi2008\_1\_40813\_hit2  
5' UGGAUAUAAGAGCUGGGCUGU  
| | | | | | | | | | | | | | | | | |  
ACCUAUAUUCUC-ACCAGACU 5'  
AT1G73220.1 336 355  
putative transporter

SRNA\_AG01\_SoLexa\_Mi2008\_2\_14040\_hit1  
5' GAGGAAUAUAUUUGAUUU  
| | | | | | | | | | | | | | | | | |  
GUCCUUUAUAUAAAC-AAA 5'  
AT1G73220.1 75 92  
putative transporter

SRNA\_AG01\_SoLexa\_Mi2008\_1\_38353\_hit4  
5' UGCAAGGAGUCGCAACUCCGA  
| | | | | | | | | | | | | | | | | |  
ACGGU-C-UCAGCGUUCAGGCU 5'  
AT1G73260.1 631 650  
putative trypsin inhibitor (At1g73260)

SRNA\_AG01\_SoLexa\_Mi2008\_6\_35858\_hit1  
5' UGAGACGCAAGGCGAUGAUGAG  
| | | | | | | | | | | | | | | | | |  
ACUCUGCUUCCUCUACUACUA 5'  
AT1G73325.1 236 257

SRNA\_AG01\_SoLexa\_Mi2008\_10\_4341\_hit1  
5' CAACAAUGGAGCUUCAAGAGGA  
| | | | | | | | | | | | | | | | | |  
GUUGUUACCUCG-A-UUAUCCU 5'  
AT1G73325.1 495 514

SRNA\_AG01\_SoLexa\_Mi2008\_1\_37225\_hit4  
5' UGAUGAUGAUGAUGAUG-AAGAAG  
| | | | | | | | | | | | | | | | | |

flowers\_1sup\_AG01\_SoLexa\_Mi\_Cell\_2008\_hit\_target\_site.txt

ACUACUACUACUACUACUUCUUC 5'  
AT1G73500.1 129 152  
unknown protein

SRNA\_AG01\_SoLexa\_Mi2008\_1\_45036\_hit1  
5' UGUGAUGAGGAGGAUGAUGAA  
||||||| || |||||  
UCACUACUACUACUACUUCUUC 5'  
AT1G73500.1 133 153  
unknown protein

SRNA\_AG01\_SoLexa\_Mi2008\_1\_56092\_hit3  
5' UUUGUGAUGAUGAUGAUGAUGA  
|||||||  
UCUCACUACUACUACUACUUCUUC 5'  
AT1G73500.1 134 155  
unknown protein

SRNA\_AG01\_SoLexa\_Mi2008\_6\_14255\_hit369  
5' GAUGA-UGAUGAUGAUGAUGAUGAU  
|| || |||||  
CU-CUCACUACUACUACUACUUCUUC 5'  
AT1G73500.1 134 157  
unknown protein

SRNA\_AG01\_SoLexa\_Mi2008\_1\_36323\_hit13  
5' UGAG-GAUGAUGAUGAUGAUGA  
|||| |||||  
ACUCACUACUACUACUACUUCUUC 5'  
AT1G73500.1 135 156  
unknown protein

SRNA\_AG01\_SoLexa\_Mi2008\_1\_3079\_hit472  
5' AUGA-UGAUGAUGAUGAUGAUGA  
||| |||||  
GACUCACUACUACUACUACUUCUUC 5'  
AT1G73500.1 135 157  
unknown protein

SRNA\_AG01\_SoLexa\_Mi2008\_1\_45039\_hit3  
5' UGUGA-UGAUGAUGAUGAUGAUGA  
| ||| |||||  
AGACUCACUACUACUACUACUUCUUC 5'  
AT1G73500.1 135 158  
unknown protein

SRNA\_AG01\_SoLexa\_Mi2008\_1\_2280\_hit1  
5' AGUGGAUGAUGAUGAUGAUGAUG  
|||| |||||  
UCAC-UACUACUACUACUACUUCUUC 5'  
AT1G73500.1 136 154  
unknown protein

SRNA\_AG01\_SoLexa\_Mi2008\_1\_6801\_hit1  
5' CAUAAACAGCAGGACGAUCCU  
|||||||  
GUAUUUGUCGUCCUGCUAGGA 5'  
AT1G74100.1 1051 1071  
putative flavonol sulfotransferase

SRNA\_AG01\_SoLexa\_Mi2008\_2\_56163\_hit1  
5' UUUGUGU-GUCUUUGAUUC-AUU  
|||| || |||||

flowers\_1sup\_AG01\_SoLexa\_Mi\_Cell\_2008\_hit\_target\_site.txt

AAACCCAACAGAAACUAAGGUAA 5'  
AT1G74100.1 189 211

putative flavonol sulfotransferase

SRNA\_AG01\_SoLexa\_Mi2008\_1\_36550\_hit1

5' UGAGGGUUUCGUUUGAGGAGU  
|||||  
ACUCCCAAAGCAAACUCCUCA 5'

AT1G74100.1 506 526

putative flavonol sulfotransferase

SRNA\_AG01\_SoLexa\_Mi2008\_1\_18261\_hit1

5' UAAGGGACAAACUCGUGAGGG  
|||||  
AUUCCUGUUUGAGCACUCCC 5'

AT1G74100.1 521 541

putative flavonol sulfotransferase

SRNA\_AG01\_SoLexa\_Mi2008\_1\_4144\_hit1

5' CAAAGGAUUGGCCCUCAUGGUC  
|||||  
GUUCCUAACCGGGAGUACCAG 5'

AT1G74100.1 884 905

putative flavonol sulfotransferase

SRNA\_AG01\_SoLexa\_Mi2008\_1\_36898\_hit1

5' UGAGUUGGAUGAUGAUGAUGA  
||||| | |||||  
ACUCA-C-UACUACUACUACU 5'

AT1G74450.1 100 118

unknown protein

SRNA\_AG01\_SoLexa\_Mi2008\_1\_3079\_hit472

5' AUGAUGA-UGAUGAUGAUGAUGA  
||| || |||||  
GACU-CUCACUACUACUACUACU 5'

AT1G74450.1 100 121

unknown protein

SRNA\_AG01\_SoLexa\_Mi2008\_1\_36323\_hit13

5' UGAG-GA-UGAUGAUGAUGAUGA  
|||| | |||||  
ACUCUCUCACUACUACUACUACU 5'

AT1G74450.1 100 122

unknown protein

SRNA\_AG01\_SoLexa\_Mi2008\_1\_14208\_hit2

5' GAUCGAUAAACCUCUGCAUC  
||||| ||| |  
CUAGCUAUUUGGAGA-GUCG 5'

AT1G74450.1 376 394

unknown protein

SRNA\_AG01\_SoLexa\_Mi2008\_3\_8704\_hit1

5' CGAUCGAUAAACCUCUGCAU  
||||| ||  
ACUAGCUAUUUGGAGA-GUC 5'

AT1G74450.1 377 395

unknown protein

SRNA\_AG01\_SoLexa\_Mi2008\_2\_21756\_hit1

5' UAGAUCGAUAAACCUCUGCAU  
:||||| ||

flowers\_1sup\_AG01\_SoLexa\_Mi\_Cell\_2008\_hit\_target\_site.txt

GUCUAGCUAUUUGGAGA-GUC 5'  
AT1G74450.1 377 396  
unknown protein

SRNA\_AG01\_SoLexa\_Mi2008\_1\_37225\_hit4  
5' UGA-UGAUGAUGAUGAUGAAGAAG  
||| |||||  
ACUCACUACUACUACUU-UUA 5'  
AT1G74450.1 96 118  
unknown protein

SRNA\_AG01\_SoLexa\_Mi2008\_1\_2280\_hit1  
5' AGUGGAUGAUGAUGAUGAUG  
|||| ||||| :  
UCAC-UACUACUACUUU 5'  
AT1G74450.1 98 116  
unknown protein

SRNA\_AG01\_SoLexa\_Mi2008\_9\_14254\_hit8  
5' GAUGAUGAUGAUGAUGAUCUU  
|| ||||| |||||  
CU-CUACUACUACCACUAGAU 5'  
AT1G76580.1 615 634  
Squamosa promoter binding protein-like 16 (SPL16)

SRNA\_AG01\_SoLexa\_Mi2008\_1\_49672\_hit1  
5' UUCUACAGCAAAAAUCUAUAA  
|| ||||| |||||  
AA-AUGUCGUUUUUUGAUUA 5'  
AT1G76590.1 1135 1155  
unknown protein

SRNA\_AG01\_SoLexa\_Mi2008\_3\_4962\_hit3  
5' CAAGUAAUAACAUUUAACCU  
||||| |||||  
GUUCAUUAGUGUAAAUUGCC 5'  
AT1G76590.1 773 792  
unknown protein

SRNA\_AG01\_SoLexa\_Mi2008\_21\_8641\_hit2  
5' CGAGUCAGCAUCCAGAACCUA  
||| ||| |||||  
GCUAAGUC-UAAGGUCUUGGAC 5'  
AT1G76600.1 202 222  
unknown protein

SRNA\_AG01\_SoLexa\_Mi2008\_1\_37225\_hit4  
5' UGAUGAUGAUGAUGAUGAAGAAG  
||||| |||||  
UCUACUACUACUUCUUCUUC 5'  
AT1G76600.1 226 248  
unknown protein

SRNA\_AG01\_SoLexa\_Mi2008\_3\_13421\_hit1  
5' GAAGAAGAAGAUGAUGUUGAU  
||||| ||||| |||  
CUUCUUCUACUACUACUU 5'  
AT1G76600.1 233 253  
unknown protein

SRNA\_AG01\_SoLexa\_Mi2008\_3\_13421\_hit1  
5' GAAGAAGAAGAUGAUGUUGAU  
||||| |||||

flowers\_1sup\_AG01\_SoLexa\_Mi\_Cell\_2008\_hit\_target\_site.txt

AUUCUUCUUCUACUACUACUA 5'  
AT1G76600.1 236 256  
unknown protein

SRNA\_AG01\_SoLexa\_Mi2008\_1\_53872\_hit1  
5' UUUAA-AAUGAAGAUGAUGAUGA  
||||| || |||||||||||||||  
AAAAUUCU-CUUCUACUACUACU 5'  
AT1G76600.1 238 259  
unknown protein

SRNA\_AG01\_SoLexa\_Mi2008\_4\_12045\_hit2  
5' CUGGUAAUUGGAAUG-AGUAC  
||||||||||||||| | |||||  
GACCAUUAACCUU-CUUCAUC 5'  
AT1G77120.1 2 21  
alcohol dehydrogenase

SRNA\_AG01\_SoLexa\_Mi2008\_5\_12044\_hit2  
5' CUGGUAAUUGGAAUG-AGUA  
||||||||||||||| | |||||  
GACCAUUAACCUU-CUUCAU 5'  
AT1G77120.1 3 21  
alcohol dehydrogenase

SRNA\_AG01\_SoLexa\_Mi2008\_1\_3\_hit25  
5' AAAAAAAAAAAAAAGAAAGA  
||||||||||| |||||  
CCUUUUUUUUUUUGUUUCU 5'  
AT1G78370.1 789 807  
unknown protein

SRNA\_AG01\_SoLexa\_Mi2008\_1\_50384\_hit1  
5' UUGACGGACGAAGUAAGUGGA  
||||||||||||||||| |||||  
AACUGCCUGCUUCAUUAACCU 5'  
AT1G78820.1 1017 1037  
Strong similarity to glycoprotein EP1

SRNA\_AG01\_SoLexa\_Mi2008\_1\_50384\_hit1  
5' UUGACGGACGAAGUAAGUGGA  
||||||||||||||||| |||||  
AACUGCCUGCUUCAUUCACCU 5'  
AT1G78830.1 1016 1036  
unknown protein (At1g78830)

SRNA\_AG01\_SoLexa\_Mi2008\_2\_35025\_hit1  
5' UGAAUGAUGAUGUGAAAGAA  
:||||| ||||||| |||||  
GCUUACCACUACAC-UUCUU 5'  
AT1G78830.1 219 237  
unknown protein (At1g78830)

SRNA\_AG01\_SoLexa\_Mi2008\_1\_13416\_hit2  
5' GAAGAAAGCGAUGAUGACUCAG  
||||||| ||||||||| | |||  
CUUCUUUGGCUACUACUAA-UC 5'  
AT1G79900.1 257 277  
putative carnitine/acylcarnitine translocase

SRNA\_AG01\_SoLexa\_Mi2008\_1\_22821\_hit1  
5' UAGGAUGAAACCGAUGAUGAG  
|||:| |||||||||||||

flowers\_1sup\_AG01\_Solexa\_Mi\_Cell\_2008\_hit\_target\_site.txt

AUCUU-CUUUGGCUACUACUA 5'  
AT1G79900.1 260 279  
putative carnitine/acylcarnitine translocase

SRNA\_AG01\_Solexa\_Mi2008\_3\_38618\_hit1  
5' UGCCGGAGAUGAUGGACGG-GA  
|||||  
ACGGCCUCUACUA-CGGCCGCU 5'  
AT1G79900.1 408 428  
putative carnitine/acylcarnitine translocase

SRNA\_AG01\_Solexa\_Mi2008\_37\_14464\_hit3  
5' GCAGCAAGGCCACUCUGCCAC  
|||||  
CGUCGUUCCGGUG-GUCGGUG 5'  
AT1G79900.1 950 969  
putative carnitine/acylcarnitine translocase

SRNA\_AG01\_Solexa\_Mi2008\_1\_41610\_hit1  
5' UGGCUGAACGAGUUUGGCAGG  
|||||:|  
ACCGACUUGCUCGA-CCG-CC 5'  
AT1G80160.1 566 584  
unknown protein

SRNA\_AG01\_Solexa\_Mi2008\_1\_5313\_hit2  
5' CACACGCAAU-AAAGUAGACAAG  
|||||  
GUGUGCGUUAGUUUC-UCUGUUA 5'  
AT1G80160.1 658 679  
unknown protein

SRNA\_AG01\_Solexa\_Mi2008\_1\_41610\_hit1  
5' UGGCUGAACGAGUUUGGCAGG  
|||||:|  
ACCGACUUGCUC-GACCG-CC 5'  
AT1G80160.2 664 682  
unknown protein

SRNA\_AG01\_Solexa\_Mi2008\_1\_5313\_hit2  
5' CACACGCAAU-AAAGUAGACAAG  
|||||  
GUGUGCGUUAGUUUC-UCUGUUA 5'  
AT1G80160.2 756 777  
unknown protein

SRNA\_AG01\_Solexa\_Mi2008\_17\_5479\_hit1  
5' CACCAUGGAAAGGCUGAAG  
|||||  
UCGGUACCCUCCGACUUC 5'  
AT1G80300.1 167 185  
adenine nucleotide translocase

SRNA\_AG01\_Solexa\_Mi2008\_2\_17207\_hit1  
5' UAACACCACCAAGAC-UCCU  
|||||  
CGUGUGGUGGUUCUGUAGGA 5'  
AT1G80300.1 508 527  
adenine nucleotide translocase

SRNA\_AG01\_Solexa\_Mi2008\_8\_4655\_hit1  
5' CAAGAGUGUUUGAGAGUA  
|||||

flowers\_1sup\_AG01\_SoLexa\_Mi\_Cell\_2008\_hit\_target\_site.txt

GUUCUCACAAAC-C-CUAG 5'  
AT2G05910.1 325 341  
unknown protein

SRNA\_AG01\_SoLexa\_Mi2008\_1\_55155\_hit1  
5' UUUGA-GAUGAUGAUGACUUAU  
:||||| |||||:  
GAACUACUACUACUACUGAUG 5'  
AT2G05940.1 1242 1262  
putative protein kinase

SRNA\_AG01\_SoLexa\_Mi2008\_9\_14254\_hit8  
5' GAUGAUGAUGAUGAUGAUCUU  
||||| ||||| ||  
CUACUACUACUACUACU-GAU 5'  
AT2G05940.1 1243 1262  
putative protein kinase

SRNA\_AG01\_SoLexa\_Mi2008\_7\_3078\_hit1  
5' AUGAUGAUGA-GAAUGAUGAU  
||||| || |||||:  
UACUACUACUACU-ACUACUG 5'  
AT2G05940.1 1245 1264  
putative protein kinase

SRNA\_AG01\_SoLexa\_Mi2008\_1\_7931\_hit2  
5' CCCGAUGAUGAUGAUGA-GAC  
| ||||| ||||| ||  
GUUCUACUACUACUACUACUG 5'  
AT2G05940.1 1245 1265  
putative protein kinase

SRNA\_AG01\_SoLexa\_Mi2008\_1\_56092\_hit3  
5' UUUGU-GAUGAUGAUGAUGAUGA  
:||||| |||||:  
GAACAACUACUACUACUACU 5'  
AT2G05940.1 1246 1268  
putative protein kinase

SRNA\_AG01\_SoLexa\_Mi2008\_2\_4635\_hit1  
5' CAAGAGGACCCAAAGUUGCGA  
||||| |||||:  
GUUCUCCUGGGUUUCAACGCU 5'  
AT2G15090.1 1077 1097  
putative fatty acid elongase

SRNA\_AG01\_SoLexa\_Mi2008\_1\_40614\_hit1  
5' UGGAGGUCGAGUGAUGGCGUUG  
||||| ||||| |||||  
ACCUCC-GCUCACUACCUAAC 5'  
AT2G15090.1 634 654  
putative fatty acid elongase

SRNA\_AG01\_SoLexa\_Mi2008\_1\_40847\_hit1  
5' UGGAUCCGUACGGUGUGAACA  
||||| |||||:  
ACCUAGGCAUGCCACACUUGU 5'  
AT2G15090.1 934 954  
putative fatty acid elongase

SRNA\_AG01\_SoLexa\_Mi2008\_1\_22510\_hit1  
5' UAGCU-GCCGGAGACAACAUU  
||| | ||||| |||||

flowers\_1sup\_AG01\_SoLexa\_Mi\_Cell\_2008\_hit\_target\_site.txt

AUC-AGCGGCCUCUGCUGUAA 5'  
AT2G17230.1 33 52  
unknown protein

SRNA\_AG01\_SoLexa\_Mi2008\_1\_56662\_hit4  
5' UUUUUGAAGGCAAGA-GA-GAGA  
||||| ||||||||| || |||||  
AAAAAGUCCGUUCUACUACUCU 5'  
AT2G21050.1 48 70  
AUX1-like amino acid permease

SRNA\_AG01\_SoLexa\_Mi2008\_10\_30296\_hit1  
5' UCCUGUAGUUGUUGGUAGCGA  
||||| ||||||||| || || |||  
AGGACAUCAACA-CCUUC-CU 5'  
AT2G21050.1 746 764  
AUX1-like amino acid permease

SRNA\_AG01\_SoLexa\_Mi2008\_1\_51316\_hit1  
5' UUGCAACAGUAGCG-CCGAAA  
||||| ||||||||| | |||||  
CACGUUGUCAUCGCUGUCUUU 5'  
AT2G21620.1 789 809  
RD2 protein (RD2)

SRNA\_AG01\_SoLexa\_Mi2008\_1\_51316\_hit1  
5' UUGCAACAGUAGCG-CCGAAA  
||||| ||||||||| | |||||  
CACGUUGUCAUCGCUGUCUUU 5'  
AT2G21620.2 807 827  
RD2 protein (RD2)

SRNA\_AG01\_SoLexa\_Mi2008\_1\_23262\_hit1  
5' UAGGGUCUUGAAACGUUGUGAG  
||||| ||||||| |||||||||  
AUCCC-GAACUUCGCAACACUC 5'  
AT2G22330.1 129 149  
putative cytochrome P450

SRNA\_AG01\_SoLexa\_Mi2008\_1\_21384\_hit1  
5' UAGAGGAGGCGCGUUGACGGU  
||||| ||||||||| |||||||||  
AUCUCCUCCGCGCAACUGCCA 5'  
AT2G22500.1 438 458  
putative mitochondrial dicarboxylate carrier protein

SRNA\_AG01\_SoLexa\_Mi2008\_2\_4570\_hit2  
5' CAAGAAGAGAUUCCAU-AGU  
||||| ||||||| ||||| |||  
GUUCUUCUCUUAGGUAGUCA 5'  
AT2G22840.1 233 252  
unknown protein

SRNA\_AG01\_SoLexa\_Mi2008\_3\_5131\_hit1  
5' CAAUGAAAAAGGGCCUAAU-CUC  
||||| ||||||||| || || |||  
GUUACUUUUUCCAGGAAAUGAG 5'  
AT2G22840.1 471 493  
unknown protein

SRNA\_AG01\_SoLexa\_Mi2008\_9\_5355\_hit1  
5' CACAG-CUUUCUUGAACUUU  
||||| ||||||||| |

flowers\_1sup\_AG01\_SoLexa\_Mi\_Cell\_2008\_hit\_target\_site.txt

GUGUCCGAAAGAACUUGCUA 5'  
AT2G22840.1 780 799  
unknown protein

SRNA\_AG01\_SoLexa\_Mi2008\_138\_7679\_hit1  
5' CCACAG-CUUUCUUGAACUG  
||||||| ||||||||| :  
GGUGUCCGAAAGAACUUGCU 5'  
AT2G22840.1 781 800  
unknown protein

SRNA\_AG01\_SoLexa\_Mi2008\_54\_7680\_hit1  
5' CCACAG-CUUUCUUGAACUU  
||||||| ||||||||| :  
GGUGUCCGAAAGAACUUGCU 5'  
AT2G22840.1 781 800  
unknown protein

SRNA\_AG01\_SoLexa\_Mi2008\_18\_29330\_hit1  
5' UCCACAG-CUUUCUUGAACUG  
||||||| ||||||||| :  
AGGUGUCCGAAAGAACUUGCU 5'  
AT2G22840.1 781 801  
unknown protein

SRNA\_AG01\_SoLexa\_Mi2008\_11\_29331\_hit1  
5' UCCACAG-CUUUCUUGAACUU  
||||||| ||||||||| :  
AGGUGUCCGAAAGAACUUGCU 5'  
AT2G22840.1 781 801  
unknown protein

SRNA\_AG01\_SoLexa\_Mi2008\_1449\_48967\_hit1  
5' UCCACAG-CUUUCUUGAACUG  
||||||| ||||||||| :  
AAGGUGUCCGAAAGAACUUGCU 5'  
AT2G22840.1 781 802  
unknown protein

SRNA\_AG01\_SoLexa\_Mi2008\_809\_48968\_hit1  
5' UCCACAG-CUUUCUUGAACUU  
||||||| ||||||||| :  
AAGGUGUCCGAAAGAACUUGCU 5'  
AT2G22840.1 781 802  
unknown protein

SRNA\_AG01\_SoLexa\_Mi2008\_9\_12589\_hit1  
5' CUCCACAG-CUUUCUUGAACUG  
||||||| ||||||||| :  
GAAGGUGUCCGAAAGAACUUGCU 5'  
AT2G22840.1 781 803  
unknown protein

SRNA\_AG01\_SoLexa\_Mi2008\_8\_48966\_hit2  
5' UCCACAG-CUUUCUUGAACU  
||||||| ||||||||| :  
AAGGUGUCCGAAAGAACUUGC 5'  
AT2G22840.1 782 802  
unknown protein

SRNA\_AG01\_SoLexa\_Mi2008\_5\_12588\_hit1  
5' CUCCACAG-CUUUCUUGAACU  
||||||| |||||||||

flowers\_1sup\_AG01\_SoLexa\_Mi\_Cell\_2008\_hit\_target\_site.txt

GAAGGUGUCCGAAAGAACUUGC 5'  
AT2G22840.1 782 803  
unknown protein

SRNA\_AG01\_SoLexa\_Mi2008\_1\_42987\_hit1  
5' UGGUAUGAUGAUGUGUUACUCA  
| | | | | | | | | | | | | | | | | |  
ACCAUACUACAACACAA-G-GU 5'  
AT2G22840.1 949 968  
unknown protein

SRNA\_AG01\_SoLexa\_Mi2008\_1\_28594\_hit1  
5' UCA-GGUGAGAUUAGAGGAGAUU  
| | | | | | | | | | | | | | | | | |  
AGUGCCACUCUAAACCCUCUAA 5'  
AT2G22900.1 264 286  
unknown protein

SRNA\_AG01\_SoLexa\_Mi2008\_1\_1776\_hit10  
5' AGAAAAAAAA-AAAAAA-AAAAAU  
| | | | | | | | | | | | | | | | | |  
UAUUUUUUUAUUUUUUUAUUUUUA 5'  
AT2G23790.1 1293 1315  
unknown protein

SRNA\_AG01\_SoLexa\_Mi2008\_1\_1776\_hit10  
5' AGAAA-AAAAAAAA-AAAAAAAAAU  
| | | | | | | | | | | | | | | | | |  
UAUUUUUUUUUUUAUUUUUUUUUA 5'  
AT2G23790.1 1306 1328  
unknown protein

SRNA\_AG01\_SoLexa\_Mi2008\_1\_21596\_hit4  
5' UAGAGUGA-ACAAUGAUGAG  
| | | | | | | | | | | | | | | | | |  
CUCUCA-UCUGUUACUACUC 5'  
AT2G23810.1 942 960  
similar to senescence-associated protein

SRNA\_AG01\_SoLexa\_Mi2008\_1\_12714\_hit5  
5' CUUCUUGUUGAGUGCCGCGAG  
| | | | | | | | | | | | | | | | | |  
UAAGAACAAGCACGGCGCUC 5'  
AT2G24600.3 842 862  
unknown protein

SRNA\_AG01\_SoLexa\_Mi2008\_1\_10750\_hit1  
5' CUCAGUGCCUUCAUCUUCGUC  
| | | | | | | | | | | | | | | | | |  
GAG-C-CGGAAGUCGAAGCAG 5'  
AT2G24850.1 391 409  
putative tyrosine aminotransferase

SRNA\_AG01\_SoLexa\_Mi2008\_1\_33497\_hit1  
5' UCUGCAGCACUUGGUGAAGUA  
| | | | | | | | | | | | | | | | | |  
AGA-G-CUUGAACCAUCUUAU 5'  
AT2G25450.1 1019 1037  
putative dioxygenase

SRNA\_AG01\_SoLexa\_Mi2008\_3\_49087\_hit1  
5' UUCCGAGGUGGUGUGUCU  
| | | | | | | | | | | | | | | | | |

flowers\_1sup\_AG01\_SoLexa\_Mi\_Cell\_2008\_hit\_target\_site.txt

AAGGCUCCACCACAG-AGA 5'  
AT2G25450.1 1089 1106  
putative dioxygenase

SRNA\_AG01\_SoLexa\_Mi2008\_9\_52832\_hit1  
5' UUGGGUUGGU-UCGGGUUAGAA  
||||| ||| ||| |||  
AACCAAAACAGAGCCCAUAUCUU 5'  
AT2G25450.1 450 472  
putative dioxygenase

SRNA\_AG01\_SoLexa\_Mi2008\_1\_2638\_hit1  
5' AUAGGUUGUGCAGUUUGAGCU  
||||| | |||  
UAUCCUAGACGUCAAACUCGA 5'  
AT2G25490.1 1962 1982  
putative glucose regulated repressor protein

SRNA\_AG01\_SoLexa\_Mi2008\_1\_21036\_hit2  
5' UA-GACAGUUGCCG-CACCCACA  
|| |||  
AUGCUGUCAACGGCGGUGGGGGU 5'  
AT2G25625.2 254 276  
unknown protein

SRNA\_AG01\_SoLexa\_Mi2008\_1\_21036\_hit2  
5' UA-GACAGUUGCCG-CACCCACA  
|| |||  
AUGCUGUCAACGGCGGUGGGGGU 5'  
AT2G25625.1 289 311  
unknown protein

SRNA\_AG01\_SoLexa\_Mi2008\_2\_26713\_hit3  
5' UC-AAAGCCAAAUCAUAUCAC  
|| |||  
AGCUUUCGCUUUAGUUUAUAGUA 5'  
AT2G26530.2 431 452  
AR781, similar to yeast pheromone receptor

SRNA\_AG01\_SoLexa\_Mi2008\_1\_10600\_hit3  
5' CUC-AAAGCCAAAUCAUAUCAC  
||| |||  
GAGCUUUCGCUUUAGUUUAUAGUA 5'  
AT2G26530.2 431 453  
AR781, similar to yeast pheromone receptor

SRNA\_AG01\_SoLexa\_Mi2008\_3\_26712\_hit3  
5' UC-AAAGCCAAAUCAUAUCA  
|| |||  
AGCUUUCGCUUUAGUUUAUAGU 5'  
AT2G26530.2 432 452  
AR781, similar to yeast pheromone receptor

SRNA\_AG01\_SoLexa\_Mi2008\_2\_26713\_hit3  
5' UC-AAAGCCAAAUCAUAUCAC  
|| |||  
AGCUUUCGCUUUAGUUUAUAGUA 5'  
AT2G26530.1 449 470  
AR781, similar to yeast pheromone receptor

SRNA\_AG01\_SoLexa\_Mi2008\_1\_10600\_hit3  
5' CUC-AAAGCCAAAUCAUAUCAC  
||| |||

flowers\_1sup\_AG01\_SoLexa\_Mi\_Cell\_2008\_hit\_target\_site.txt

GAGCUUUCGCUUUAGUUUAUAGUA 5'  
AT2G26530.1 449 471  
AR781, similar to yeast pheromone receptor

SRNA\_AG01\_SoLexa\_Mi2008\_3\_26712\_hit3  
5' UC-AAAGCCAAAUCAUAUCA  
|| ||||| |||||  
AGCUUUCGCUUUAGUUUAUAGU 5'  
AT2G26530.1 450 470  
AR781, similar to yeast pheromone receptor

SRNA\_AG01\_SoLexa\_Mi2008\_1\_14490\_hit1  
5' GCAUCAUGAUAGUGUUGUAG  
||||||| ||||| | |||||  
CGUAGUUACUAUC-C-ACAUC 5'  
AT2G26560.1 961 979  
similar to latex allergen from Hevea brasiliensis

SRNA\_AG01\_SoLexa\_Mi2008\_1\_806\_hit1  
5' AAGAGCAUCAUGAUAG-UGUU  
|| ||||| ||||| |||||  
UU-UCGUAGUUACUAUCCACAU 5'  
AT2G26560.1 962 982  
similar to latex allergen from Hevea brasiliensis

SRNA\_AG01\_SoLexa\_Mi2008\_1\_5212\_hit1  
5' CAUUUAAGUUUUUAUGGGCUCUC  
|||||||: || |||||  
GUUAAUCAAAGUA--CGAGAG 5'  
AT2G27310.1 514 533  
Unknown protein (At2g27310; F12K2.11)

SRNA\_AG01\_SoLexa\_Mi2008\_2\_15799\_hit1  
5' GUCUGAAGGAUUAGAGGAAC  
|| ||||| |||||  
CA-ACUCCUAACCUCCUUC 5'  
AT2G28190.1 109 127  
putative copper/zinc superoxide dismutase

SRNA\_AG01\_SoLexa\_Mi2008\_1\_11584\_hit1  
5' CUGAUGACAUAAA-UUUACAU  
||||||| ||||| ||  
GACUACUGUAUUUGAAAU-UA 5'  
AT2G28510.1 1045 1064  
DOF zinc finger like protein

SRNA\_AG01\_SoLexa\_Mi2008\_3\_35894\_hit1  
5' UGAGAGCAGAGAAAGAGAGU  
||||| |||||  
ACUCUC-UCUCUUUCUCUCU 5'  
AT2G28510.1 24 42  
DOF zinc finger like protein

SRNA\_AG01\_SoLexa\_Mi2008\_8\_13576\_hit1  
5' GACAAACUAAUGUUUAUAGU  
||||||| ||||| |||  
CUGUUUGUAACAAUAU-UCA 5'  
AT2G28510.1 709 728  
DOF zinc finger like protein

SRNA\_AG01\_SoLexa\_Mi2008\_3\_29723\_hit1  
5' UCCCCUACA AUGUCGAG-UAA  
| ||||| ||||| |||

AUGGGAAGGUUACAGCUCAAUU 5'  
 AT2G30140.2 1103 1124  
 putative glucosyltransferase

SRNA\_AG01\_SoLexa\_Mi2008\_3\_29723\_hit1  
 5' UCCCCUACAAUGUCGAGU-AA  
 | ||||| |||||||||||| ||  
 AUGGGAAGGUUACAGCUCAAUU 5'  
 AT2G30140.1 1106 1127  
 putative glucosyltransferase

SRNA\_AG01\_SoLexa\_Mi2008\_1\_53677\_hit1  
 5' UUGUGUAGAGUGUGAU-UUGGU  
 ||||| || ||||||| |||||  
 AACACUUCACACACUAAAACCA 5'  
 AT2G30140.2 35 56  
 putative glucosyltransferase

SRNA\_AG01\_SoLexa\_Mi2008\_1\_43489\_hit1  
 5' UGGUGGCGUUGUUGGUCUUGAA  
 ||||| ||||||| |||||||  
 ACCACCACAACAACAAGAACUC 5'  
 AT2G31070.1 1037 1058  
 unknown protein

SRNA\_AG01\_SoLexa\_Mi2008\_1\_51213\_hit1  
 5' UUGAUGUUCUGAUGAG-AUCCU  
 ||||||||| ||||| || |  
 AACUACAAGACUACUCCUACUA 5'  
 AT2G31070.1 1215 1236  
 unknown protein

SRNA\_AG01\_SoLexa\_Mi2008\_2\_51261\_hit1  
 5' UUGAUUGAUGUUCAGAUGAUGAU  
 ||| ||||||||| ||||| |||  
 AAC-AACUACAAGACUACUCCUA 5'  
 AT2G31070.1 1218 1239  
 unknown protein

SRNA\_AG01\_SoLexa\_Mi2008\_7\_3078\_hit1  
 5' AUGAUGAUGAGAAUGAUGAU  
 ||||| |||| |||||||  
 UACUACCACUCCUACUACUA 5'  
 AT2G31070.1 1279 1298  
 unknown protein

SRNA\_AG01\_SoLexa\_Mi2008\_6\_14255\_hit369  
 5' GAUGAUGAUGAUGAUGAUGAUGAU  
 ||||||||| || |||||||||  
 CUACUACUACCACUCCUACUACUA 5'  
 AT2G31070.1 1279 1302  
 unknown protein

SRNA\_AG01\_SoLexa\_Mi2008\_1\_3079\_hit472  
 5' AUGAUGAUGAUGAUGAUGAUGAUGA  
 ||||||||| |||| |||||||||  
 UACUACUACCACUCCUACUACU 5'  
 AT2G31070.1 1280 1301  
 unknown protein

SRNA\_AG01\_SoLexa\_Mi2008\_1\_45039\_hit3  
 5' UG-UGAUGAUGAUGAUGAUGAUGA  
 || ||||||||| || |||||||||

flowers\_1sup\_AG01\_Solexa\_Mi\_Cell\_2008\_hit\_target\_site.txt

ACUACUACUACCACUCCUACUACU 5'  
 AT2G31070.1 1281 1304  
 unknown protein

SRNA\_AG01\_Solexa\_Mi2008\_6\_14255\_hit369  
 5' GAUGAUGAUGAUGAUGAUGAUGAU  
 ||||| ||||| ||||| ||||| |||||  
 CUACUACUACUACCACUCCUACUA 5'  
 AT2G31070.1 1282 1305  
 unknown protein

SRNA\_AG01\_Solexa\_Mi2008\_1\_3079\_hit472  
 5' AUGAUGAUGAUGAUGAUGAUGA  
 ||||| ||||| ||||| ||||| |||||  
 UACUACUACUACCACUCCUACU 5'  
 AT2G31070.1 1283 1304  
 unknown protein

SRNA\_AG01\_Solexa\_Mi2008\_7\_11649\_hit2  
 5' CUGAUUGAUGAUGAUGGAUCU  
 ||||| ||||| ||||| ||||| |||||:  
 GACUA-CUACUACUAC-UAGG 5'  
 AT2G31070.1 1449 1467  
 unknown protein

SRNA\_AG01\_Solexa\_Mi2008\_1\_36898\_hit1  
 5' UGAGU-UGGAUGAUGAUGAUGA  
 ||| | || ||||| ||||| |||||  
 ACUAAGAC-UACUACUACUACU 5'  
 AT2G31070.1 1452 1472  
 unknown protein

SRNA\_AG01\_Solexa\_Mi2008\_1\_14057\_hit1  
 5' GAGGAGAAGCAGAAGCAAGUU  
 ||||| ||||| ||||| ||||| |||||  
 CUCCUCUUCUUCUUC--UCAA 5'  
 AT2G31070.1 1591 1609  
 unknown protein

SRNA\_AG01\_Solexa\_Mi2008\_5\_12942\_hit1  
 5' CUUGGGACAGAGUGUG-CUUAC  
 ||||| ||||| ||||| ||||| |||||  
 GAACC-UGUCUCACACAGAAGG 5'  
 AT2G31560.2 95 115  
 unknown protein

SRNA\_AG01\_Solexa\_Mi2008\_1\_40688\_hit1  
 5' UGGAGUCCAGUCAAGAAUG-UC  
 ||| ||||| ||||| ||||| |||||  
 ACC-CAGGGUCAGUUCGUACUAG 5'  
 AT2G31610.1 643 664  
 40S ribosomal protein; contains C-terminal domain

SRNA\_AG01\_Solexa\_Mi2008\_8\_4777\_hit1  
 5' CAAGCUGCCAUGUCAUCAGAG  
 ||||| ||||| ||||| ||||| |||||  
 UUUCGAGGGUACAGUAGUCUC 5'  
 AT2G31660.1 2038 2058  
 importin (nuclear transport factor ) like protein

SRNA\_AG01\_Solexa\_Mi2008\_2\_37314\_hit1  
 5' UGAUGGAG-GACCUUGCUGAUA  
 ||||| || ||||| ||||| |||||

flowers\_1sup\_AG01\_SoLexa\_Mi\_Cell\_2008\_hit\_target\_site.txt

ACUAC-UCACUGGAACGACUAG 5'  
AT2G31660.1 3747 3767  
importin (nuclear transport factor ) like protein

SRNA\_AG01\_SoLexa\_Mi2008\_7\_3090\_hit1  
5' AUGAUGGAG-GACCUUGCUGAU  
||||| || |||||||||||||  
CACUAC-UCACUGGAACGACUA 5'  
AT2G31660.1 3748 3768  
importin (nuclear transport factor ) like protein

SRNA\_AG01\_SoLexa\_Mi2008\_2\_5577\_hit1  
5' CACGAAGAGCAUGAU-GGGUC  
|| ||||||||||||| |||||  
GU-CUUCUCGUACUAUCCCAA 5'  
AT2G31660.1 74 93  
importin (nuclear transport factor ) like protein

SRNA\_AG01\_SoLexa\_Mi2008\_1\_7415\_hit1  
5' CAUGUUUGGAUACUUGUUCUG  
||||||||| ||||||| |||  
GUACAAACCAAUGAAC-AGAA 5'  
AT2G31890.1 2071 2090  
unknown protein

SRNA\_AG01\_SoLexa\_Mi2008\_1\_25400\_hit1  
5' UAUGAUGAUGAAGUUGAUGUU  
||||||||| ||||| |||||  
CUACUACUACAUCAACAACAA 5'  
AT2G31945.1 367 387  
unknown protein

SRNA\_AG01\_SoLexa\_Mi2008\_1\_33665\_hit5  
5' UCUGGUCCUGAUUGAAUCCAA  
||||||| ||||:|||||||  
AGACCAGAACUAGCUUAGGUA 5'  
AT2G32870.1 1274 1294  
unknown protein

SRNA\_AG01\_SoLexa\_Mi2008\_11\_14876\_hit4  
5' GGAGGUGGUGG-UGG-UGGUGGU  
||||||||||| ||| ||||| |  
CCUCCACCACCAACCUACCACAA 5'  
AT2G33770.1 108 130  
ubiquitin-conjugating enzyme E2 -like protein

SRNA\_AG01\_SoLexa\_Mi2008\_24\_502\_hit1  
5' AAAGGAGGUGGUGGUUG-AU  
| ||||||||||||||| |||  
UCUCCUCCACCACCAACCUA 5'  
AT2G33770.1 114 133  
ubiquitin-conjugating enzyme E2 -like protein

SRNA\_AG01\_SoLexa\_Mi2008\_1\_28360\_hit2  
5' UCAGCGGCGGAUCC-CACAAUGU  
|||| ||||||| || |||||||||  
AGUCACCGCCU-GGCGUGUUACA 5'  
AT2G33770.1 1331 1352  
ubiquitin-conjugating enzyme E2 -like protein

SRNA\_AG01\_SoLexa\_Mi2008\_2\_10859\_hit1  
5' CUCCAUCUCUCUCUCUGCUU  
|||| ||||||||||||| ||

flowers\_1sup\_AG01\_SoLexa\_Mi\_Cell\_2008\_hit\_target\_site.txt

GAGGAAGAGAGAGAGAC-AA 5'  
AT2G33770.1 175 193  
ubiquitin-conjugating enzyme E2 -like protein

SRNA\_AG01\_SoLexa\_Mi2008\_4\_38337\_hit1  
5' UGCCAAAGGAGAUUUGCCUGU  
|||||||:|||||||:  
ACGGUUUCUUCUAAACGGGAU 5'  
AT2G33770.1 605 626  
ubiquitin-conjugating enzyme E2 -like protein

SRNA\_AG01\_SoLexa\_Mi2008\_1041\_38329\_hit2  
5' UGCCAAAGGAGAGUUGCCUG  
|||||||:||| |||||:  
ACGGUUUCUUCUAAACGGGAU 5'  
AT2G33770.1 606 626  
ubiquitin-conjugating enzyme E2 -like protein

SRNA\_AG01\_SoLexa\_Mi2008\_2\_38332\_hit1  
5' UGCCAAAGGAGAUUUGCCCG  
|||||||:||||||| :  
ACGGUUUCUUCUAAACGGGAU 5'  
AT2G33770.1 606 626  
ubiquitin-conjugating enzyme E2 -like protein

SRNA\_AG01\_SoLexa\_Mi2008\_92\_38333\_hit1  
5' UGCCAAAGGAGAUUUGCCCG  
|||||||:||||||| :  
ACGGUUUCUUCUAAACGGGAU 5'  
AT2G33770.1 606 626  
ubiquitin-conjugating enzyme E2 -like protein

SRNA\_AG01\_SoLexa\_Mi2008\_101\_38336\_hit1  
5' UGCCAAAGGAGAUUUGCCUG  
|||||||:|||||||:  
ACGGUUUCUUCUAAACGGGAU 5'  
AT2G33770.1 606 626  
ubiquitin-conjugating enzyme E2 -like protein

SRNA\_AG01\_SoLexa\_Mi2008\_74\_51466\_hit1  
5' UGCCAAAGGAGAGUUGCCUG  
|||||||:||| |||||:  
AACGGUUUCUUCUAAACGGGAU 5'  
AT2G33770.1 606 627  
ubiquitin-conjugating enzyme E2 -like protein

SRNA\_AG01\_SoLexa\_Mi2008\_7\_38328\_hit2  
5' UGCCAAAGGAGAGUUGCCU  
|||||||:||| |||||  
ACGGUUUCUUCUAAACGGGA 5'  
AT2G33770.1 607 626  
ubiquitin-conjugating enzyme E2 -like protein

SRNA\_AG01\_SoLexa\_Mi2008\_2\_38335\_hit1  
5' UGCCAAAGGAGAUUUGCCU  
|||||||:|||||||  
ACGGUUUCUUCUAAACGGGA 5'  
AT2G33770.1 607 626  
ubiquitin-conjugating enzyme E2 -like protein

SRNA\_AG01\_SoLexa\_Mi2008\_1\_51465\_hit1  
5' UGCCAAAGGAGAGUUGCCU  
|||||||:||| |||||

flowers\_1sup\_AG01\_SoLexa\_Mi\_Cell\_2008\_hit\_target\_site.txt

AACGGUUUCUUCUAAAACGGGA 5'  
AT2G33770.1 607 627  
ubiquitin-conjugating enzyme E2 -like protein

sRNA\_AG01\_SoLexa\_Mi2008\_1\_38331\_hit4  
5' UGCCAAAGGAGAUUUGCCC  
|||||||:|||||||  
ACGGUUUCUUCUAAAACGGG 5'  
AT2G33770.1 608 626  
ubiquitin-conjugating enzyme E2 -like protein

SRNA\_AG01\_SoLexa\_Mi2008\_4\_38337\_hit1  
5' UGCCAAAGGAGAUUUGCCCUGU  
|||||||:|||||||  
ACGGUUUCCUCUAUACGGGAUC 5'  
AT2G33770.1 738 759  
ubiquitin-conjugating enzyme E2 -like protein

sRNA\_AG01\_SoLexa\_Mi2008\_2\_38332\_hit1  
5' UGCCAAAGGAGAUUUGCCCCG  
|||||||:|||||||  
ACGGUUUCCUCUAUACGGGAU 5'  
AT2G33770.1 739 759  
ubiquitin-conjugating enzyme E2 -like protein

sRNA\_AG01\_SoLexa\_Mi2008\_92\_38333\_hit1  
5' UGCCAAAGGAGAUUUGCCCCG  
|||||||:|||||||  
ACGGUUUCCUCUAUACGGGAU 5'  
AT2G33770.1 739 759  
ubiquitin-conjugating enzyme E2 -like protein

sRNA\_AG01\_SoLexa\_Mi2008\_101\_38336\_hit1  
5' UGCCAAAGGAGAUUUGCCCUG  
|||||||:|||||||  
ACGGUUUCCUCUAUACGGGAU 5'  
AT2G33770.1 739 759  
ubiquitin-conjugating enzyme E2 -like protein

sRNA\_AG01\_SoLexa\_Mi2008\_2\_7575\_hit2  
5' CCAAAGGAGAGU-UGCCCUG  
|||||||:|||||||  
GGUUUCCUCU-AUACGGGAU 5'  
AT2G33770.1 740 758  
ubiquitin-conjugating enzyme E2 -like protein

sRNA\_AG01\_SoLexa\_Mi2008\_26\_14499\_hit2  
5' GCCAAAGGAGAGU-UGCCCUG  
|||||||:|||||||  
CGGUUCCUCU-AUACGGGAU 5'  
AT2G33770.1 740 759  
ubiquitin-conjugating enzyme E2 -like protein

sRNA\_AG01\_SoLexa\_Mi2008\_2\_38335\_hit1  
5' UGCCAAAGGAGAUUUGCCCU  
|||||||:|||||||  
ACGGUUUCCUCUAUACGGGA 5'  
AT2G33770.1 740 759  
ubiquitin-conjugating enzyme E2 -like protein

sRNA\_AG01\_SoLexa\_Mi2008\_1041\_38329\_hit2  
5' UGCCAAAGGAGAGU-UGCCCUG  
|||||||:|||||||

ACGGUUUCCUCU-AUACGGGAU 5'  
AT2G33770.1 740 760  
ubiquitin-conjugating enzyme E2 -like protein

SRNA\_AG01\_SoLexa\_Mi2008\_74\_51466\_hit1  
5' UUGCCAAAGGAGAGU-UGCCUG  
|||||||:|||||||  
AACGGUUUCCUCU-AUACGGGAU 5'  
AT2G33770.1 740 761  
ubiquitin-conjugating enzyme E2 -like protein

SRNA\_AG01\_SoLexa\_Mi2008\_1\_38331\_hit4  
5' UGCCAAAGGAGAUUUGCCC  
|||||||:|||||||  
ACGGUUUCCUCU-AUACGGG 5'  
AT2G33770.1 741 759  
ubiquitin-conjugating enzyme E2 -like protein

SRNA\_AG01\_SoLexa\_Mi2008\_7\_38328\_hit2  
5' UGCCAAAGGAGAGU-UGCCCU  
|||||||:|||||||  
ACGGUUUCCUCU-AUACGGGA 5'  
AT2G33770.1 741 760  
ubiquitin-conjugating enzyme E2 -like protein

SRNA\_AG01\_SoLexa\_Mi2008\_1\_51465\_hit1  
5' UUGCCAAAGGAGAGU-UGCCCU  
|||||||:|||||||  
AACGGUUUCCUCU-AUACGGGA 5'  
AT2G33770.1 741 761  
ubiquitin-conjugating enzyme E2 -like protein

SRNA\_AG01\_SoLexa\_Mi2008\_3\_38327\_hit2  
5' UGCCAAAGGAGAGU-UGCCC  
|||||||:|||||||  
ACGGUUUCCUCU-AUACGGG 5'  
AT2G33770.1 742 760  
ubiquitin-conjugating enzyme E2 -like protein

SRNA\_AG01\_SoLexa\_Mi2008\_1\_26738\_hit1  
5' UCAAAGGGGAACCCAAGAUGUG  
|||||||:|||||||  
AGUUUCCCCUUGGGUUCUACAC 5'  
AT2G33770.1 774 795  
ubiquitin-conjugating enzyme E2 -like protein

SRNA\_AG01\_SoLexa\_Mi2008\_6\_14501\_hit1  
5' GCCAAAGGAGAUUUGCCCGGU  
|||||||:|||||||  
CGGUUCCUCUAAACGGGUUG 5'  
AT2G33770.1 827 847  
ubiquitin-conjugating enzyme E2 -like protein

SRNA\_AG01\_SoLexa\_Mi2008\_4\_38334\_hit1  
5' UGCCAAAGGAGAUUUGCCCGGU  
|||||||:|||||||  
ACGGUUUCCUCUAAACGGGUUG 5'  
AT2G33770.1 827 848  
ubiquitin-conjugating enzyme E2 -like protein

SRNA\_AG01\_SoLexa\_Mi2008\_4\_38337\_hit1  
5' UGCCAAAGGAGAUUUGCCUGU  
|||||||:|||||||

flowers\_1sup\_AG01\_SoLexa\_Mi\_Cell\_2008\_hit\_target\_site.txt

ACGGUUUCCUCUAAAACGGGUUG 5'  
AT2G33770.1 827 848  
ubiquitin-conjugating enzyme E2 -like protein

SRNA\_AG01\_SoLexa\_Mi2008\_2\_7575\_hit2  
5' CCAAAGGAGAGUUGCCUG  
||||||| :  
GGUUUCCUCUAAAACGGGUU 5'  
AT2G33770.1 828 846  
ubiquitin-conjugating enzyme E2 -like protein

SRNA\_AG01\_SoLexa\_Mi2008\_26\_14499\_hit2  
5' GCCAAAGGAGAGUUGCCUG  
||||||| :  
CGUUUCCUCUAAAACGGGUU 5'  
AT2G33770.1 828 847  
ubiquitin-conjugating enzyme E2 -like protein

SRNA\_AG01\_SoLexa\_Mi2008\_1041\_38329\_hit2  
5' UGCCAAAGGAGAGUUGCCUG  
||||||| :  
ACGGUUUCCUCUAAAACGGGUU 5'  
AT2G33770.1 828 848  
ubiquitin-conjugating enzyme E2 -like protein

SRNA\_AG01\_SoLexa\_Mi2008\_2\_38332\_hit1  
5' UGCCAAAGGAGAUUUGCCCG  
||||||| :  
ACGGUUUCCUCUAAAACGGGUU 5'  
AT2G33770.1 828 848  
ubiquitin-conjugating enzyme E2 -like protein

SRNA\_AG01\_SoLexa\_Mi2008\_92\_38333\_hit1  
5' UGCCAAAGGAGAUUUGCCCG  
||||||| :  
ACGGUUUCCUCUAAAACGGGUU 5'  
AT2G33770.1 828 848  
ubiquitin-conjugating enzyme E2 -like protein

SRNA\_AG01\_SoLexa\_Mi2008\_101\_38336\_hit1  
5' UGCCAAAGGAGAUUUGCCUG  
||||||| :  
ACGGUUUCCUCUAAAACGGGUU 5'  
AT2G33770.1 828 848  
ubiquitin-conjugating enzyme E2 -like protein

SRNA\_AG01\_SoLexa\_Mi2008\_7\_38328\_hit2  
5' UGCCAAAGGAGAGUUGCCCU  
||||||| :  
ACGGUUUCCUCUAAAACGGGU 5'  
AT2G33770.1 829 848  
ubiquitin-conjugating enzyme E2 -like protein

SRNA\_AG01\_SoLexa\_Mi2008\_2\_38335\_hit1  
5' UGCCAAAGGAGAUUUGCCCU  
||||||| :  
ACGGUUUCCUCUAAAACGGGU 5'  
AT2G33770.1 829 848  
ubiquitin-conjugating enzyme E2 -like protein

SRNA\_AG01\_SoLexa\_Mi2008\_1\_51465\_hit1  
5' UGCCAAAGGAGAGUUGCCCU  
|||||||

flowers\_1sup\_AG01\_SoLexa\_Mi\_Cell\_2008\_hit\_target\_site.txt

UACGGUUUCCUCUAAAACGGGU 5'  
AT2G33770.1 829 849  
ubiquitin-conjugating enzyme E2 -like protein

SRNA\_AG01\_SoLexa\_Mi2008\_3\_38327\_hit2  
5' UGCCAAAGGAGAGUUGCCC  
|||||  
ACGGUUUCCUCUAAAACGGG 5'  
AT2G33770.1 830 848  
ubiquitin-conjugating enzyme E2 -like protein

SRNA\_AG01\_SoLexa\_Mi2008\_1\_38331\_hit4  
5' UGCCAAAGGAGAUUUGCCC  
|||||  
ACGGUUUCCUCUAAAACGGG 5'  
AT2G33770.1 830 848  
ubiquitin-conjugating enzyme E2 -like protein

SRNA\_AG01\_SoLexa\_Mi2008\_2\_38335\_hit1  
5' UGCCAAAGGAGAUUUGCCCU  
|||||  
ACGGUUUCCUCUAAAACGAGC 5'  
AT2G33770.1 886 905  
ubiquitin-conjugating enzyme E2 -like protein

SRNA\_AG01\_SoLexa\_Mi2008\_3\_38327\_hit2  
5' UGCCAAAGGAGAGUUGCCC  
|||||  
ACGGUUUCCUCUAAAACGAG 5'  
AT2G33770.1 887 905  
ubiquitin-conjugating enzyme E2 -like protein

SRNA\_AG01\_SoLexa\_Mi2008\_1\_38331\_hit4  
5' UGCCAAAGGAGAUUUGCCC  
|||||  
ACGGUUUCCUCUAAAACGAG 5'  
AT2G33770.1 887 905  
ubiquitin-conjugating enzyme E2 -like protein

SRNA\_AG01\_SoLexa\_Mi2008\_2\_38335\_hit1  
5' UGCCAAAGGAGAUUUGCCCU  
|||||  
ACGGUUUCCUCUAAAACGAGA 5'  
AT2G33770.1 943 962  
ubiquitin-conjugating enzyme E2 -like protein

SRNA\_AG01\_SoLexa\_Mi2008\_3\_38327\_hit2  
5' UGCCAAAGGAGAGUUGCCC  
|||||  
ACGGUUUCCUCUAAAACGAG 5'  
AT2G33770.1 944 962  
ubiquitin-conjugating enzyme E2 -like protein

SRNA\_AG01\_SoLexa\_Mi2008\_1\_38331\_hit4  
5' UGCCAAAGGAGAUUUGCCC  
|||||  
ACGGUUUCCUCUAAAACGAG 5'  
AT2G33770.1 944 962  
ubiquitin-conjugating enzyme E2 -like protein

SRNA\_AG01\_SoLexa\_Mi2008\_1\_39748\_hit1  
5' UGGAAGCAGAUGGUUCGUU  
|||||

flowers\_1sup\_AG01\_SoLexa\_Mi\_Cell\_2008\_hit\_target\_site.txt

ACCUUGGUCUACCAAGCUA 5'  
AT2G33860.1 1523 1541  
auxin response transcription factor 3 (ETTIN/ARF3)

SRNA\_AG01\_SoLexa\_Mi2008\_1\_35469\_hit1  
5' UGACCUUGUAAGACCCCAUCU  
|||||||:||||| || |||  
ACUGGAACGUUCUG-GG-AGA 5'  
AT2G33860.1 1672 1690  
auxin response transcription factor 3 (ETTIN/ARF3)

SRNA\_AG01\_SoLexa\_Mi2008\_7\_33918\_hit1  
5' UCUUGACCUUGUAAGACCCCA  
|||||||:|||||||  
AGAACUGGAACGUUCUGGGAG 5'  
AT2G33860.1 1672 1692  
auxin response transcription factor 3 (ETTIN/ARF3)

SRNA\_AG01\_SoLexa\_Mi2008\_7\_49853\_hit1  
5' UUCUUGACCUUGUAAGACCCCA  
|||||||:|||||||  
AAGAACUGGAACGUUCUGGGAG 5'  
AT2G33860.1 1672 1693  
auxin response transcription factor 3 (ETTIN/ARF3)

SRNA\_AG01\_SoLexa\_Mi2008\_7\_12746\_hit1  
5' CUUGACCUUGUAAGACCCC  
|||||||:|||||||  
GAACUGGAACGUUCUGGGA 5'  
AT2G33860.1 1673 1691  
auxin response transcription factor 3 (ETTIN/ARF3)

SRNA\_AG01\_SoLexa\_Mi2008\_7\_49852\_hit1  
5' UUCUUGACCUUGUAAGACCCC  
|||||||:|||||||  
AAGAACUGGAACGUUCUGGGA 5'  
AT2G33860.1 1673 1693  
auxin response transcription factor 3 (ETTIN/ARF3)

SRNA\_AG01\_SoLexa\_Mi2008\_4\_55012\_hit1  
5' UUUCUUGACCUUGUAAGACCCC  
|||||||:|||||||  
AAAGAACUGGAACGUUCUGGGA 5'  
AT2G33860.1 1673 1694  
auxin response transcription factor 3 (ETTIN/ARF3)

SRNA\_AG01\_SoLexa\_Mi2008\_1\_55011\_hit1  
5' UUUCUUGACCUUGUAAGACCC  
|||||||:|||||||  
AAAGAACUGGAACGUUCUGGG 5'  
AT2G33860.1 1674 1694  
auxin response transcription factor 3 (ETTIN/ARF3)

SRNA\_AG01\_SoLexa\_Mi2008\_1\_3\_hit25  
5' AAAAAAAAAAAAA--AGAAAGA  
||||||| |||||:  
UUUUUUUUUUUGAUCUUUUU 5'  
AT2G33860.1 173 193  
auxin response transcription factor 3 (ETTIN/ARF3)

SRNA\_AG01\_SoLexa\_Mi2008\_1\_2\_hit38  
5' AAA-AAAAAAAAAAAAACCAU  
||| |||||

UUUCUUUUUUUUUUUGAUC 5'  
AT2G33860.1 178 197  
auxin response transcription factor 3 (ETTIN/ARF3)

SRNA\_AG01\_SoLexa\_Mi2008\_7\_12746\_hit1  
5' CUUGACCUUGUAAGACCCC  
|||||||:|||||  
GAACUGGAACGUUCUGGAA 5'  
AT2G33860.1 1793 1811  
auxin response transcription factor 3 (ETTIN/ARF3)

SRNA\_AG01\_SoLexa\_Mi2008\_7\_49852\_hit1  
5' UUCUUGACCUUGUAAGACCCC  
|||||||:|||||  
AAGAACUGGAACGUUCUGGAA 5'  
AT2G33860.1 1793 1813  
auxin response transcription factor 3 (ETTIN/ARF3)

SRNA\_AG01\_SoLexa\_Mi2008\_4\_55012\_hit1  
5' UUUCUUGACCUUGUAAGACCCC  
|||||||:|||||  
AAAGAACUGGAACGUUCUGGAA 5'  
AT2G33860.1 1793 1814  
auxin response transcription factor 3 (ETTIN/ARF3)

SRNA\_AG01\_SoLexa\_Mi2008\_1\_55011\_hit1  
5' UUUCUUGACCUUGUAAGACCCC  
|||||||:|||||  
AAAGAACUGGAACGUUCUGGAA 5'  
AT2G33860.1 1794 1814  
auxin response transcription factor 3 (ETTIN/ARF3)

SRNA\_AG01\_SoLexa\_Mi2008\_1\_42435\_hit1  
5' UGGGGGGAGGAUACGUGUACU  
|||||||:|||||  
ACCCCCUCCUAUGCACAUGA 5'  
AT2G33860.1 1901 1921  
auxin response transcription factor 3 (ETTIN/ARF3)

SRNA\_AG01\_SoLexa\_Mi2008\_2\_52\_hit1  
5' AAAAA-AGAGAGAUACAGAGAU  
||||| ||||| |||||  
UUUUUCUCUCUCUUUGUCUCUA 5'  
AT2G33860.1 345 366  
auxin response transcription factor 3 (ETTIN/ARF3)

SRNA\_AG01\_SoLexa\_Mi2008\_1\_43638\_hit1  
5' UGGUGUCAGAUGUGUGUG-UGU  
||||| | ||||| |||||  
ACCACUGACUACACACCACA 5'  
AT2G33860.1 39 60  
auxin response transcription factor 3 (ETTIN/ARF3)

SRNA\_AG01\_SoLexa\_Mi2008\_1\_146\_hit4  
5' AAA-ACAAAAGAGGAAGAAGCU  
||| | ||||| |||||  
UUUAUCUUUAUCCUUCUUCGA 5'  
AT2G37180.1 1001 1022  
aquaporin (plasma membrane intrinsic protein 2C)

SRNA\_AG01\_SoLexa\_Mi2008\_1\_44212\_hit1  
5' UGUAGGCAAGCACGAGAAUGU  
|||||:||||||| | |||

flowers\_1sup\_AG01\_SoLexa\_Mi\_Cell\_2008\_hit\_target\_site.txt

ACAUCUGUUCGUGCU-U-ACA 5'  
AT2G37180.1 597 615  
aquaporin (plasma membrane intrinsic protein 2C)

SRNA\_AG01\_SoLexa\_Mi2008\_2\_7000\_hit28  
5' CAUCAGGUACUCCAGCGUUCU  
||||||| ||||| || |||  
GUAGUCCAGGAAGGU-GC-AGA 5'  
AT2G37180.1 80 99  
aquaporin (plasma membrane intrinsic protein 2C)

SRNA\_AG01\_SoLexa\_Mi2008\_1\_29116\_hit2  
5' UCAUUGCAAUUGUUGGUCUUA  
|| ||||| ||||| |||||  
AG-AACGUUAACAA-CAGAAGC 5'  
AT2G38790.1 164 183  
unknown protein

SRNA\_AG01\_SoLexa\_Mi2008\_7\_29115\_hit2  
5' UCAUUGCAAUUGUUGGUCUUC  
|| ||||| ||||| |||||  
AG-AACGUUAACAA-CAGAAG 5'  
AT2G38790.1 165 183  
unknown protein

SRNA\_AG01\_SoLexa\_Mi2008\_2\_2818\_hit2  
5' AUCAUUGCAAUUGUUGGUCUU  
||| ||||| ||||| |||||  
UAG-AACGUUAACAA-CAGAA 5'  
AT2G38790.1 166 184  
unknown protein

SRNA\_AG01\_SoLexa\_Mi2008\_1\_29114\_hit2  
5' UCAUUGCAAUUGUUGGUCU  
|| ||||| ||||| |||||  
AG-AACGUUAACAA-CAGA 5'  
AT2G38790.1 167 183  
unknown protein

SRNA\_AG01\_SoLexa\_Mi2008\_1\_12211\_hit1  
5' CUGU-CUAUGCAAUUGUUGUG  
|||| || ||||| |||||  
GACAAGA-ACGUUAACAACAG 5'  
AT2G38790.1 168 187  
unknown protein

SRNA\_AG01\_SoLexa\_Mi2008\_2\_6944\_hit1  
5' CAUAUACUCGAAUACCUAU  
||||||| ||||| ||  
GUAUAUGAGAUUAUGG-UA 5'  
AT2G38790.1 375 392  
unknown protein

SRNA\_AG01\_SoLexa\_Mi2008\_2\_33689\_hit1  
5' UCUGGUGGAUUACGGAUUGUG  
||||||| || |||||  
AGACCACCUAAU-CG-AACAC 5'  
AT2G39030.1 148 166  
unknown protein

SRNA\_AG01\_SoLexa\_Mi2008\_3\_40000\_hit2  
5' UGGACCCGGUCGAUGAAGUCU  
||| || ||||| |||||

ACC-GG-CCAGCCACUUCAGA 5'  
AT2G39030.1 77 95  
unknown protein

SRNA\_AG01\_SoLexa\_Mi2008\_1\_17143\_hit1  
5' UAACAAAUGAUGUGGCACGUG  
| | | | | | | | | | | | | | | | | |  
AUUGUUUACUUCACCGCGCAC 5'  
AT2G39800.1 117 137  
delta-1-pyrroline 5-carboxylase synthetase (P5C1)

SRNA\_AG01\_SoLexa\_Mi2008\_1\_2355\_hit1  
5' AUAACAAAUGACGUGGCACGUG  
| | | | | | | | | | | | | | | | | |  
GAUUGUUUACUUCACCGCGCAC 5'  
AT2G39800.1 117 138  
delta-1-pyrroline 5-carboxylase synthetase (P5C1)

SRNA\_AG01\_SoLexa\_Mi2008\_8\_48955\_hit2  
5' UUCCAUAUAUGAGUAGUGGUA  
| | | | | | | | | | | | | | | | | |  
AAG-UUAUUUAUCAUCAUU 5'  
AT2G39800.2 2287 2307  
delta-1-pyrroline 5-carboxylase synthetase (P5C1)

SRNA\_AG01\_SoLexa\_Mi2008\_8\_48955\_hit2  
5' UUCCAUAUAUGAGUAGUGGUA  
| | | | | | | | | | | | | | | | | |  
AAG-UUAUUUAUCAUCAUU 5'  
AT2G39800.1 2651 2671  
delta-1-pyrroline 5-carboxylase synthetase (P5C1)

SRNA\_AG01\_SoLexa\_Mi2008\_2\_380\_hit1  
5' AAAGAGAGAGAUGAUGCCA  
| | | | | | | | | | | | | | | | | |  
GUU-UCUCUCUACUACCGUA 5'  
AT2G40940.1 1322 1340  
ethylene response sensor (ERS)

SRNA\_AG01\_SoLexa\_Mi2008\_1\_38224\_hit4  
5' UGCAUCAUUGGUGGUGUGAG  
| | | | | | | | | | | | | | | | | |  
ACG-A-UAACCACCACACUC 5'  
AT2G40940.1 174 191  
ethylene response sensor (ERS)

SRNA\_AG01\_SoLexa\_Mi2008\_1\_5010\_hit1  
5' CAAGUGCAUUAAGAACAUC-AU  
| | | | | | | | | | | | | | | | | |  
GUU-ACGUACUUCUUGUAGGUA 5'  
AT2G40940.1 462 482  
ethylene response sensor (ERS)

SRNA\_AG01\_SoLexa\_Mi2008\_1\_4591\_hit1  
5' CAAGACAAGGAGUUUUACC  
| | | | | | | | | | | | | | | | | |  
GUUCUGUUUCUAAAAUGG 5'  
AT2G40940.1 753 771  
ethylene response sensor (ERS)

SRNA\_AG01\_SoLexa\_Mi2008\_1\_3647\_hit1  
5' AUUGAAC-GAGAUGAUGAUU-GG  
| | | | | | | | | | | | | | | | | |

flowers\_1sup\_AG01\_SoLexa\_Mi\_Cell\_2008\_hit\_target\_site.txt

UAACUAGGCUCUACUACUAAUCC 5'  
 AT2G40970.1 304 326  
 unknown protein

SRNA\_AG01\_SoLexa\_Mi2008\_1\_35931\_hit1  
 5' UGAGAGUG-AGGAGAUGAUGCGU  
 ||| ||| | |||:|||||  
 ACUCUC-CAUCCUUUACUACGCA 5'  
 AT2G41190.1 1126 1147  
 unknown protein

SRNA\_AG01\_SoLexa\_Mi2008\_1\_20735\_hit4  
 5' UACUUUUUCG-GGCAUUUUUGUG  
 ||| ||| ||| ||| ||| |||  
 AUGAAAAAGCUCC-UAAACACAC 5'  
 AT2G41190.1 27 48  
 unknown protein

SRNA\_AG01\_SoLexa\_Mi2008\_6\_53710\_hit1  
 5' UUGUGU-UCAGGAUGAUCCAGU  
 ||| ||| ||| ||| ||| |||  
 AAC-CACAGUCCUAGUAGGUCA 5'  
 AT2G42790.1 1408 1428  
 putative citrate synthase

SRNA\_AG01\_SoLexa\_Mi2008\_1\_56383\_hit1  
 5' UUU-UCCCACAAACUUGAUCGCU  
 ||| ||| ||| ||| ||| |||  
 AAUAGGGGGUUUGAACUAGCCA 5'  
 AT2G42790.1 2263 2285  
 putative citrate synthase

SRNA\_AG01\_SoLexa\_Mi2008\_4\_56382\_hit1  
 5' UUU-UCCCACAAACUUGAUCGC  
 ||| ||| ||| ||| ||| |||  
 AAUAGGGGGUUUGAACUAGCC 5'  
 AT2G42790.1 2264 2285  
 putative citrate synthase

SRNA\_AG01\_SoLexa\_Mi2008\_1\_189\_hit14  
 5' AAAAGAGGAGAAGA-CAAAGUGU  
 ||| ||| ||| ||| ||| |||  
 GUUUCUCCUCUUCUCGUUU-ACA 5'  
 AT2G42890.1 154 175  
 MEI2-like protein (MEI2)

SRNA\_AG01\_SoLexa\_Mi2008\_3\_21212\_hit1  
 5' UAGAGAGAGAAAAAGAUGGC  
 :||| ||| ||| |||  
 GUCUCUCUCUUUUU-UACCU 5'  
 AT2G42890.1 25 43  
 MEI2-like protein (MEI2)

SRNA\_AG01\_SoLexa\_Mi2008\_3\_24633\_hit1  
 5' UAUAG-UUUCAGGAGUUGUUGGA  
 ||| ||| ||| ||| ||| |||  
 AUAUCGAAAAACCUCAACAACCU 5'  
 AT2G44460.1 1386 1408  
 putative beta-glucosidase

SRNA\_AG01\_SoLexa\_Mi2008\_1\_1776\_hit10  
 5' AGAAAAAAAAAAAAAAAAA-A-AAU  
 ||| ||| ||| ||| ||| |||

flowers\_1sup\_AG01\_Solexa\_Mi\_Cell\_2008\_hit\_target\_site.txt

UCUUUCUUUUUUUUUUUCUGUUA 5'  
AT2G45210.1 109 131  
putative auxin-regulated protein

SRNA\_AG01\_Solexa\_Mi2008\_6\_733\_hit1  
5' AACUGUUCAUUAAGUAGAA  
|| |||||  
UU-ACAAGUAAUUCA-CUA 5'  
AT2G46680.2 811 827  
homeodomain transcription factor (ATHB-7)

SRNA\_AG01\_Solexa\_Mi2008\_6\_733\_hit1  
5' AACUGUUCAUUAAGUAGAA  
|| |||||  
UU-ACAAGUAAUUCA-CUA 5'  
AT2G46680.1 817 833  
homeodomain transcription factor (ATHB-7)

SRNA\_AG01\_Solexa\_Mi2008\_1\_37959\_hit1  
5' UGCACUGCCUCUCCUGGCUC  
|||||  
ACGUGACGGAGAAGGGACCGAG 5'  
AT2G47020.2 1487 1508  
peptide chain release factor like protein

SRNA\_AG01\_Solexa\_Mi2008\_11\_37958\_hit1  
5' UGCACUGCCUCUCCUGGCUC  
|||||  
ACGUGACGGAGAAGGGACCGA 5'  
AT2G47020.2 1488 1508  
peptide chain release factor like protein

SRNA\_AG01\_Solexa\_Mi2008\_3\_37957\_hit1  
5' UGCACUGCCUCUCCUGGC  
|||||  
ACGUGACGGAGAAGGGACCG 5'  
AT2G47020.2 1489 1508  
peptide chain release factor like protein

SRNA\_AG01\_Solexa\_Mi2008\_6\_3128\_hit1  
5' AUGCACUGCCUCUCCUGGC  
|||||  
UACGUGACGGAGAAGGGACCG 5'  
AT2G47020.2 1489 1509  
peptide chain release factor like protein

SRNA\_AG01\_Solexa\_Mi2008\_1\_6534\_hit1  
5' CAGGGAACAAGCAGAGCAUGG  
|||||  
GUCCCUUGUUCGUCUGUACC 5'  
AT2G47020.2 1555 1575  
peptide chain release factor like protein

SRNA\_AG01\_Solexa\_Mi2008\_3\_2164\_hit1  
5' AGGGAACAAGCAGAGCAUG  
|||||  
UCCCUUGUUCGUCUGUAC 5'  
AT2G47020.2 1556 1574  
peptide chain release factor like protein

SRNA\_AG01\_Solexa\_Mi2008\_18\_6533\_hit1  
5' CAGGGAACAAGCAGAGCAUG  
|||||

flowers\_1sup\_AG01\_SoLexa\_Mi\_Cell\_2008\_hit\_target\_site.txt

GUCCCUUGUUCGUCUCGUAC 5'  
AT2G47020.2 1556 1575  
peptide chain release factor like protein

SRNA\_AG01\_SoLexa\_Mi2008\_175\_1428\_hit1  
5' ACAGGGAACAAGCAGAGCAUG  
|||||  
UGUCCCUUGUUCGUCUCGUAC 5'  
AT2G47020.2 1556 1576  
peptide chain release factor like protein

SRNA\_AG01\_SoLexa\_Mi2008\_7\_12617\_hit1  
5' CU-UCGAAGUUUGAGCUUG-AGA  
|| || |||||  
GAGAGGUUCAACUCGAACAUCU 5'  
AT2G47170.1 269 291  
ADP-ribosylation factor 1

SRNA\_AG01\_SoLexa\_Mi2008\_1\_16455\_hit1  
5' UAAAAUGAUCUGCGUUUGAGA  
|||||  
AUUUUACUAGACGCAAACUCU 5'  
AT2G47170.1 824 844  
ADP-ribosylation factor 1

SRNA\_AG01\_SoLexa\_Mi2008\_1\_230\_hit1  
5' AAAAGGGGAAGUACAAAGUA  
|||||  
ACUUCCCCUUCAUGUUUCAC 5'  
AT2G47170.1 845 864  
ADP-ribosylation factor 1

SRNA\_AG01\_SoLexa\_Mi2008\_5\_4043\_hit2  
5' CAAACUGCC-AUGGUCGUCCAA  
|||| ||| |||||  
UUUUG-CGGCUACCAGCAGGUU 5'  
AT2G47170.1 93 113  
ADP-ribosylation factor 1

SRNA\_AG01\_SoLexa\_Mi2008\_1\_13420\_hit2  
5' GAAGAAGAAGAAGACUCUU  
||||| |||  
CUUCUUCUUCUUCU-A-AA 5'  
AT2G47730.1 125 141  
glutathione S-transferase (GST6)

SRNA\_AG01\_SoLexa\_Mi2008\_6\_44397\_hit1  
5' UGUUAUGG-GCCACAUAGGUGGG  
|||| || ||||| |||||  
ACAU-CCUCGGUGUCUCCACCC 5'  
AT2G47770.1 489 509  
unknown protein

SRNA\_AG01\_SoLexa\_Mi2008\_1\_3384\_hit1  
5' AUGGUGAAGAUGU-UUC-UAGU  
||||| ||| |||  
UACCACUUCUACAGAAGCAUGA 5'  
AT3G01420.1 291 312  
feebly like protein

SRNA\_AG01\_SoLexa\_Mi2008\_1\_51959\_hit1  
5' UUGGAAGAACGGGAUUGAGA  
||||| || |||||

flowers\_1sup\_AG01\_SoLexa\_Mi\_Cell\_2008\_hit\_target\_site.txt

AACCUGCU-GCCCUAACUCU 5'  
AT3G01470.1 438 456  
homeobox protein (HAT5)

SRNA\_AG01\_SoLexa\_Mi2008\_1\_30071\_hit1  
5' UCCGUCUGCGGUGGCCGAUU  
|||||  
AGGCAGACGCCACCAGGCUAA 5'  
AT3G03450.1 1086 1106  
RGA1-like protein

SRNA\_AG01\_SoLexa\_Mi2008\_1\_55233\_hit1  
5' UUUGAGUAUUCGGGUCGGUAUU  
||| |||  
AAAGUC-UAAGCCCAGCCCA-AA 5'  
AT3G03450.1 1233 1253  
RGA1-like protein

SRNA\_AG01\_SoLexa\_Mi2008\_1\_48488\_hit1  
5' UUCAACUGCGGUAACAUCAGAU  
:|||||  
GAGUUGACGCCAUUGAAGACUA 5'  
AT3G04070.2 932 953  
NAM-like protein (no apical meristem)

SRNA\_AG01\_SoLexa\_Mi2008\_1\_48488\_hit1  
5' UUCAACUGCGGUAACAUCAGAU  
:|||||  
GAGUUGACGCCAUUGAAGACUA 5'  
AT3G04070.1 980 1001  
NAM-like protein (no apical meristem)

SRNA\_AG01\_SoLexa\_Mi2008\_1\_4534\_hit3  
5' CAAGA-A-AAAAAGAGAUGAG  
||||| |  
GUUCUCUAUUUUUCUCUACAC 5'  
AT3G04520.1 14 34  
L-allo-threonine aldolase like protein

SRNA\_AG01\_SoLexa\_Mi2008\_2\_6737\_hit1  
5' CAG-UGGUGCUUCGGGUUACUC  
||| |||  
GUCUAC-ACGAAGCCCACUGAG 5'  
AT3G04520.1 1 21  
L-allo-threonine aldolase like protein

SRNA\_AG01\_SoLexa\_Mi2008\_2\_44800\_hit1  
5' UGUCUACGU-UGAUGAUGUUGU  
||||| |  
ACAGAUGCAUA-UACUACAACC 5'  
AT3G04520.1 965 985  
L-allo-threonine aldolase like protein

SRNA\_AG01\_SoLexa\_Mi2008\_4\_11415\_hit2  
5' CUGAAUUCGUUCAUACUACA  
||||| |||  
GACUUAACCAAGAAUGAAUGG 5'  
AT3G05155.1 1265 1285  
putative protein

SRNA\_AG01\_SoLexa\_Mi2008\_85\_22179\_hit1  
5' UAGCCAAGGAUGACUUGCCUGU  
|||||:|||||

flowers\_1sup\_AG01\_Solexa\_Mi\_Cell\_2008\_hit\_target\_site.txt

CUCGGUUUCUACUAAACGGACA 5'  
AT3G05690.1 1181 1202  
putative transcription factor

SRNA\_AG01\_Solexa\_Mi2008\_400\_22176\_hit7  
5' UAGCCAAGGAUGACUUGCCUG  
||||||:||||| |||||  
CUCGGUUUCUACUAAACGGAC 5'  
AT3G05690.1 1182 1202  
putative transcription factor

SRNA\_AG01\_Solexa\_Mi2008\_30\_36087\_hit4  
5' UGAGCCAAGGAUGACUUGCCG  
||||||:||||| |||||  
ACUCGGUUUCUACUAAACGGA 5'  
AT3G05690.1 1183 1203  
putative transcription factor

SRNA\_AG01\_Solexa\_Mi2008\_1\_1014\_hit1  
5' AAU-AGCCAAGGAUGACUUGCCUG  
||| |||||:||||| |||||  
UUACUCGGUUUCUACUAAACGGAC 5'  
AT3G05690.1 1183 1206  
putative transcription factor

SRNA\_AG01\_Solexa\_Mi2008\_4\_36086\_hit4  
5' UGAGCCAAGGAUGACUUGCC  
||||||:||||| |||||  
ACUCGGUUUCUACUAAACGG 5'  
AT3G05690.1 1184 1203  
putative transcription factor

SRNA\_AG01\_Solexa\_Mi2008\_1\_50390\_hit1  
5' UUGACGGAUACGGAUACGGAU  
|||||||  
CCAUGCCUAUGCCUAUGCCUA 5'  
AT3G06130.1 1597 1617  
unknown protein

SRNA\_AG01\_Solexa\_Mi2008\_8\_6832\_hit1  
5' CAUAAGGUGGAGGAUAUGGAU  
|||||||  
GUAUUCACCUCUAUACCUA 5'  
AT3G06130.1 1621 1641  
unknown protein

SRNA\_AG01\_Solexa\_Mi2008\_1\_341\_hit1  
5' AAAGAAACAGA-GAGGAAGAU  
||||||| |||||  
UUUCUUUGUCUCCUUCUU 5'  
AT3G06130.1 162 182  
unknown protein

SRNA\_AG01\_Solexa\_Mi2008\_1\_26337\_hit1  
5' UAU-U-GCAGCUUGAUGUGUUCU  
||| | |||||  
AUAUAGCGUCGAACUACACAAGA 5'  
AT3G06130.1 1676 1698  
unknown protein

SRNA\_AG01\_Solexa\_Mi2008\_1\_40229\_hit3  
5' UGGAGACAAGUGAUGAUGAU  
||||||| ||||| |||||

flowers\_1sup\_AG01\_SoLexa\_Mi\_Cell\_2008\_hit\_target\_site.txt

ACCUCUGUUCACAACUA-UACUC 5'  
AT3G06390.1 373 394  
unknown protein

SRNA\_AG01\_SoLexa\_Mi2008\_1\_10771\_hit1  
5' CUCAUAUGGAGAGUGUUGACC  
||| | |||||:|||||  
GAG-A-ACCUCUCACGACUGG 5'  
AT3G06390.1 647 665  
unknown protein

SRNA\_AG01\_SoLexa\_Mi2008\_1\_23335\_hit2  
5' UAGGUAAUGAUUGAGGAGGCC  
|||| ||||| |||||  
AUCC-UUACUUACUCCUCCGG 5'  
AT3G08720.1 1655 1674  
putative ribosomal-protein S6 kinase (ATPK19)

SRNA\_AG01\_SoLexa\_Mi2008\_1\_23335\_hit2  
5' UAGGUAAUGAUUGAGGAGGCC  
|||| ||||| |||||  
AUCC-UUACUUACUCCUCCGG 5'  
AT3G08720.2 1843 1862  
putative ribosomal-protein S6 kinase (ATPK19)

SRNA\_AG01\_SoLexa\_Mi2008\_3\_53977\_hit1  
5' UUUAAGGGUGCGGUGUAG-AGU  
||||||| | ||||| |||  
AAAUUCCACACAACAUCUUCA 5'  
AT3G08860.1 304 325  
aminotransferase like protein

SRNA\_AG01\_SoLexa\_Mi2008\_1\_2\_hit38  
5' AAAAA-AAAAAAAAACCAU  
||||| ||||| ||||| |  
UUUUUCUUUUUUUUUGAUC 5'  
AT3G09440.1 2114 2133  
heat-shock protein (At-hsc70-3)

SRNA\_AG01\_SoLexa\_Mi2008\_1\_1776\_hit10  
5' AGAAA-AAAAA-AAAAAAAAAU  
||||| ||||| |||||:|  
UCUUUCUUUUUCUUUUUUUUUG 5'  
AT3G09440.1 2117 2139  
heat-shock protein (At-hsc70-3)

SRNA\_AG01\_SoLexa\_Mi2008\_1\_45820\_hit1  
5' UGUUAAUGAUGGAACUGUGCGA  
||| | ||||| ||||| |||  
ACAACUACUACCGUGACAC-CU 5'  
AT3G09810.1 1075 1095  
putative dehydrogenase

SRNA\_AG01\_SoLexa\_Mi2008\_1\_40348\_hit1  
5' UGGAGAUGGUCUAAGGAUGAG  
:|||| |||| | |||||  
GCCUCCACCACAUUCCUACUC 5'  
AT3G10040.1 299 319  
unknown protein

SRNA\_AG01\_SoLexa\_Mi2008\_1\_2\_hit38  
5' AAAAAAAAAAAAAAAAAACCAU  
||||||| ||||| ||

flowers\_1sup\_AG01\_Solexa\_Mi\_Cell\_2008\_hit\_target\_site.txt

UUUUUUUUUUUUUUUUUUUGUUA 5'  
AT3G10300.4 1119 1137  
unknown protein

SRNA\_AG01\_Solexa\_Mi2008\_1\_2\_hit38  
5' AAAAAAAAAAAAAAAAAACCAU  
| | | | | | | | | | | | | | | |  
UUUUUUUUUUUUUUUUUUUGUUA 5'  
AT3G10300.3 1126 1144  
unknown protein

SRNA\_AG01\_Solexa\_Mi2008\_1\_2\_hit38  
5' AAAAAAAAAAAAAAAAAACCAU  
| | | | | | | | | | | | | | | |  
UUUUUUUUUUUUUUUUUUUGUUA 5'  
AT3G10300.2 1339 1357  
unknown protein

SRNA\_AG01\_Solexa\_Mi2008\_17\_7551\_hit1  
5' CCAAAAAGGAAAGACGCU-GAU  
| | | | | | | | | | | | | | | | |  
GGUUUUUUCCUUUCUG-GAUCUU 5'  
AT3G10300.1 799 820  
unknown protein

SRNA\_AG01\_Solexa\_Mi2008\_1\_11370\_hit1  
5' CUGAAGCCGAGUGAUG-UGAC  
| | | | | | | | | | | | | | | |  
UACUUCUGCUCACUACCACUG 5'  
AT3G10500.1 42 62  
unknown protein

SRNA\_AG01\_Solexa\_Mi2008\_1\_3\_hit25  
5' AAAA-AA-AAAAAAGAAAGA  
| | | | | | | | | | | | | | | |  
UUUUCUUUUUUUUUUUCUUUCU 5'  
AT3G10930.1 406 426  
unknown protein

SRNA\_AG01\_Solexa\_Mi2008\_1\_3188\_hit1  
5' AU-GCUCUAAGUCUUGAUCGU  
| | | | | | | | | | | | | | | | : |  
UAUC-AGAUUCAGAACUAGUA 5'  
AT3G10930.1 544 563  
unknown protein

SRNA\_AG01\_Solexa\_Mi2008\_38\_14830\_hit2  
5' GGACUGAAGGGAGCUCUU  
| | | | | | | | | | | | | | | |  
CCUUACUUCCUCGAGGUC 5'  
AT3G11440.1 1153 1171  
transcription factor like protein (MYB65)

SRNA\_AG01\_Solexa\_Mi2008\_19\_40112\_hit2  
5' UGGACUGAAGGGAGCUCUU  
| | | | | | | | | | | | | | | |  
ACCUUACUUCCUCGAGGUC 5'  
AT3G11440.1 1153 1172  
transcription factor like protein (MYB65)

SRNA\_AG01\_Solexa\_Mi2008\_705\_52065\_hit2  
5' UUGGACUGAAGGGAGCUCUU  
| | | | | | | | | | | | | | | |

AACCUUACUUCCCUCGAGGUC 5'  
AT3G11440.1 1153 1173  
transcription factor like protein (MYB65)

SRNA\_AG01\_Solexa\_Mi2008\_16\_52069\_hit1  
5' UUGGACUGAAGGGAGCUCCU  
||||| |||||||||||||||  
AACCUUACUUCCCUCGAGGUC 5'  
AT3G11440.1 1153 1173  
transcription factor like protein (MYB65)

SRNA\_AG01\_Solexa\_Mi2008\_7\_3717\_hit1  
5' AUUGGACUGAAGGGAGCUCCU  
||||| |||||||||||||||  
UAACCUUACUUCCCUCGAGGUC 5'  
AT3G11440.1 1153 1174  
transcription factor like protein (MYB65)

SRNA\_AG01\_Solexa\_Mi2008\_3349\_41018\_hit1  
5' UGGAUUGAAGGGAGCUCUA  
||||| |||||||||||||||:  
ACCUUACUUCCCUCGAGGU 5'  
AT3G11440.1 1154 1172  
transcription factor like protein (MYB65)

SRNA\_AG01\_Solexa\_Mi2008\_1621\_41020\_hit1  
5' UGGAUUGAAGGGAGCUCU  
||||| |||||||||||||||:  
ACCUUACUUCCCUCGAGGU 5'  
AT3G11440.1 1154 1172  
transcription factor like protein (MYB65)

SRNA\_AG01\_Solexa\_Mi2008\_24\_52064\_hit2  
5' UUGGACUGAAGGGAGCUCCC  
||||| |||||||||||||||  
AACCUUACUUCCCUCGAGGU 5'  
AT3G11440.1 1154 1173  
transcription factor like protein (MYB65)

SRNA\_AG01\_Solexa\_Mi2008\_7\_52068\_hit1  
5' UUGGACUGAAGGGAGCUCCU  
||||| |||||||||||||||  
AACCUUACUUCCCUCGAGGU 5'  
AT3G11440.1 1154 1173  
transcription factor like protein (MYB65)

SRNA\_AG01\_Solexa\_Mi2008\_1\_52243\_hit1  
5' UUGGAUUGAAGGGAGCUCCU  
||||| |||||||||||||||  
AACCUUACUUCCCUCGAGGU 5'  
AT3G11440.1 1154 1173  
transcription factor like protein (MYB65)

SRNA\_AG01\_Solexa\_Mi2008\_3416\_52245\_hit1  
5' UUGGAUUGAAGGGAGCUCUA  
||||| |||||||||||||||:  
AACCUUACUUCCCUCGAGGU 5'  
AT3G11440.1 1154 1173  
transcription factor like protein (MYB65)

SRNA\_AG01\_Solexa\_Mi2008\_870\_52246\_hit1  
5' UUGGAUUGAAGGGAGCUCU  
||||| |||||||||||||||:

AACCUUACUUCCCUCGAGGU 5'  
AT3G11440.1 1154 1173  
transcription factor like protein (MYB65)

SRNA\_AG01\_Solexa\_Mi2008\_1\_3716\_hit1  
5' AUUGGACUGAAGGGAGCUCC  
||||| |||||||||||||  
UAACCUUACUUCCCUCGAGGU 5'  
AT3G11440.1 1154 1174  
transcription factor like protein (MYB65)

SRNA\_AG01\_Solexa\_Mi2008\_21\_12906\_hit1  
5' CUUGGACUGAAGGGAGCUCC  
||||| |||||||||||||  
UAACCUUACUUCCCUCGAGGU 5'  
AT3G11440.1 1154 1174  
transcription factor like protein (MYB65)

SRNA\_AG01\_Solexa\_Mi2008\_61\_55550\_hit1  
5' UUUGGACUGAAGGGAGCUCCU  
||||| |||||||||||||  
UAACCUUACUUCCCUCGAGGU 5'  
AT3G11440.1 1154 1174  
transcription factor like protein (MYB65)

SRNA\_AG01\_Solexa\_Mi2008\_14\_55632\_hit1  
5' UUUGGAUUGAAGGGAGCUCCU  
||||| |||||||||||||  
UAACCUUACUUCCCUCGAGGU 5'  
AT3G11440.1 1154 1174  
transcription factor like protein (MYB65)

SRNA\_AG01\_Solexa\_Mi2008\_15\_52063\_hit3  
5' UUGGACUGAAGGGAGCUCC  
||||| |||||||||||||  
AACCUUACUUCCCUCGAGG 5'  
AT3G11440.1 1155 1173  
transcription factor like protein (MYB65)

SRNA\_AG01\_Solexa\_Mi2008\_52\_52244\_hit2  
5' UUGGAUUGAAGGGAGCUCU  
||||| |||||||||||||:  
AACCUUACUUCCCUCGAGG 5'  
AT3G11440.1 1155 1173  
transcription factor like protein (MYB65)

SRNA\_AG01\_Solexa\_Mi2008\_9\_55631\_hit1  
5' UUUGGAUUGAAGGGAGCUCC  
||||| |||||||||||||  
UAACCUUACUUCCCUCGAGG 5'  
AT3G11440.1 1155 1174  
transcription factor like protein (MYB65)

SRNA\_AG01\_Solexa\_Mi2008\_1201\_55633\_hit2  
5' UUUGGAUUGAAGGGAGCUCU  
||||| |||||||||||||:  
UAACCUUACUUCCCUCGAGG 5'  
AT3G11440.1 1155 1174  
transcription factor like protein (MYB65)

SRNA\_AG01\_Solexa\_Mi2008\_136\_14386\_hit1  
5' GAUUGGACUGAAGGGAGCUCC  
||||| |||||||||||||

flowers\_1sup\_AG01\_SoLexa\_Mi\_Cell\_2008\_hit\_target\_site.txt

AUAACCUUACUCCUCGAGG 5'  
AT3G11440.1 1155 1175  
transcription factor like protein (MYB65)

SRNA\_AG01\_SoLexa\_Mi2008\_3\_55549\_hit1  
5' UUUGGACUGAAGGGAGCUC  
||||| ||||||||||||  
UAACCUUACUCCUCGAG 5'  
AT3G11440.1 1156 1174  
transcription factor like protein (MYB65)

SRNA\_AG01\_SoLexa\_Mi2008\_907\_55630\_hit3  
5' UUUGGAUUGAAGGGAGCUC  
||||| ||||||||||||  
UAACCUUACUCCUCGAG 5'  
AT3G11440.1 1156 1174  
transcription factor like protein (MYB65)

SRNA\_AG01\_SoLexa\_Mi2008\_4\_13220\_hit2  
5' CUUUGGAUUGAAGGGAGCUC  
||||| ||||||||||||  
AUAACCUUACUCCUCGAG 5'  
AT3G11440.1 1156 1175  
transcription factor like protein (MYB65)

SRNA\_AG01\_SoLexa\_Mi2008\_1\_14385\_hit1  
5' GAUUGGACUGAAGGGAGCUC  
||||| ||||||||||||  
AUAACCUUACUCCUCGAG 5'  
AT3G11440.1 1156 1175  
transcription factor like protein (MYB65)

SRNA\_AG01\_SoLexa\_Mi2008\_5\_13219\_hit2  
5' CUUUGGAUUGAAGGGAGCU  
||||| ||||||||||||  
AUAACCUUACUCCUCGA 5'  
AT3G11440.1 1157 1175  
transcription factor like protein (MYB65)

SRNA\_AG01\_SoLexa\_Mi2008\_1\_1257\_hit1  
5' ACA-ACGACAAUGAUGGAGAA  
||| | ||||| |||||||||  
UGUCU-CUGUCCUACCUCUU 5'  
AT3G11440.1 35 54  
transcription factor like protein (MYB65)

SRNA\_AG01\_SoLexa\_Mi2008\_2\_13419\_hit2  
5' GAAGAAGAAGAAGACACUU  
|||||||||| ||| ||||  
CUUCUUCUCCUCU-UGAA 5'  
AT3G11720.1 1287 1304  
unknown protein

SRNA\_AG01\_SoLexa\_Mi2008\_2\_13419\_hit2  
5' GAAGAAGAAGAAGACACUU  
|||||||||| ||| ||||  
CUUCUUCUCCUCU-UGAA 5'  
AT3G11720.2 1336 1353  
unknown protein

SRNA\_AG01\_SoLexa\_Mi2008\_1\_20871\_hit4  
5' UAGAAGAAAACCGCAGCG-GAC  
|||||||||| ||||| ||

flowers\_1sup\_AG01\_SoLexa\_Mi\_Cell\_2008\_hit\_target\_site.txt

AUCUUCUUUUGCCGUCGCUCUU 5'  
AT3G13175.1 296 317  
unknown protein

SRNA\_AG01\_SoLexa\_Mi2008\_1\_20872\_hit2  
5' UAGAAGAAAACCGCAGCG-GAU  
||||| ||||| ||  
AUCUUCUUUUGCCGUCGCUCUU 5'  
AT3G13175.1 296 317  
unknown protein

SRNA\_AG01\_SoLexa\_Mi2008\_40\_6132\_hit1  
5' CAGAU-AUGAAAGACCGUGAU  
||||| ||||| |||||: ||  
GUCUACUACUUUCUGGCAUUA 5'  
AT3G15010.2 1210 1230  
RNA-binding protein

SRNA\_AG01\_SoLexa\_Mi2008\_1\_36946\_hit4  
5' UGAUAAG-GUGACAAAGCAUGGU  
||||| | | ||||| ||||| |||||  
ACUUAU-CUCUCUGUUUCGUACCA 5'  
AT3G15010.2 1698 1719  
RNA-binding protein

SRNA\_AG01\_SoLexa\_Mi2008\_1\_2266\_hit1  
5' AGUCUCAAGAAAUUAUUAUG  
||| ||||| |||||: ||  
UCA-AGUUCUUUAUUAUUGG 5'  
AT3G15010.2 2180 2197  
RNA-binding protein

SRNA\_AG01\_SoLexa\_Mi2008\_1\_33431\_hit1  
5' UCUGAUCUGUGGUCGCUUGAA  
||||| ||||| ||||| ||||| |||||  
AGACUAGACACCAGCGAACUU 5'  
AT3G15270.1 614 634  
squamosa promoter binding protein-like 5

SRNA\_AG01\_SoLexa\_Mi2008\_1\_1352\_hit1  
5' ACAGAAGAGAGAGAGCACU  
||||| ||||| ||||| ||||| |||||  
UGUCUUCUCUCUCUCGCCC 5'  
AT3G15270.1 643 661  
squamosa promoter binding protein-like 5

SRNA\_AG01\_SoLexa\_Mi2008\_1\_13615\_hit4  
5' GACAGAAGAGAGAGAGCACA  
||||| ||||| ||||| ||||| |||||  
CUGUCUUCUCUCUCGCCC 5'  
AT3G15270.1 643 662  
squamosa promoter binding protein-like 5

SRNA\_AG01\_SoLexa\_Mi2008\_2\_35238\_hit4  
5' UGACAGAAGAGAGAGAGCACA  
||||| ||||| ||||| ||||| |||||  
ACUGUCUUCUCUCUCGCCC 5'  
AT3G15270.1 643 663  
squamosa promoter binding protein-like 5

SRNA\_AG01\_SoLexa\_Mi2008\_6\_13612\_hit1  
5' GACAGAAGAAAGAGAGCAC  
||||| ||||| ||||| |||||

CUGUCUUCUCUCUCGCC 5'  
AT3G15270.1 644 662  
squamosa promoter binding protein-like 5

SRNA\_AG01\_SoLexa\_Mi2008\_1\_13614\_hit8  
5' GACAGAAGAGAGAGAGCAG  
|||||  
CUGUCUUCUCUCUCGCC 5'  
AT3G15270.1 644 662  
squamosa promoter binding protein-like 5

SRNA\_AG01\_SoLexa\_Mi2008\_480\_13616\_hit7  
5' GACAGAAGAGAGAGAGCAG  
|||||  
CUGUCUUCUCUCUCGCC 5'  
AT3G15270.1 644 662  
squamosa promoter binding protein-like 5

SRNA\_AG01\_SoLexa\_Mi2008\_855\_13618\_hit4  
5' GACAGAAGAUAGAGAGCAG  
|||||  
CUGUCUUCUCUCUCGCC 5'  
AT3G15270.1 644 662  
squamosa promoter binding protein-like 5

SRNA\_AG01\_SoLexa\_Mi2008\_6\_35236\_hit1  
5' UGACAGAAGAAAGAGAGCAG  
|||||  
ACUGUCUUCUCUCUCGCC 5'  
AT3G15270.1 644 663  
squamosa promoter binding protein-like 5

SRNA\_AG01\_SoLexa\_Mi2008\_12\_35237\_hit8  
5' UGACAGAAGAGAGAGAGCAG  
|||||  
ACUGUCUUCUCUCUCGCC 5'  
AT3G15270.1 644 663  
squamosa promoter binding protein-like 5

SRNA\_AG01\_SoLexa\_Mi2008\_2091\_35240\_hit6  
5' UGACAGAAGAGAGAGAGCAG  
|||||  
ACUGUCUUCUCUCUCGCC 5'  
AT3G15270.1 644 663  
squamosa promoter binding protein-like 5

SRNA\_AG01\_SoLexa\_Mi2008\_193\_35244\_hit4  
5' UGACAGAAGAUAGAGAGCAG  
|||||  
ACUGUCUUCUCUCUCGCC 5'  
AT3G15270.1 644 663  
squamosa promoter binding protein-like 5

SRNA\_AG01\_SoLexa\_Mi2008\_14\_50257\_hit5  
5' UUGACAGAAGAGAGAGAGCAG  
|||||  
UACUGUCUUCUCUCUCGCC 5'  
AT3G15270.1 644 664  
squamosa promoter binding protein-like 5

SRNA\_AG01\_SoLexa\_Mi2008\_30\_35239\_hit6  
5' UGACAGAAGAGAGAGAGCA  
|||||

ACUGUCUUCUCUCUCUCGC 5'  
AT3G15270.1 645 663  
squamosa promoter binding protein-like 5

SRNA\_AG01\_SoLexa\_Mi2008\_1\_11426\_hit3  
5' CUGACAGAAGAGAGUGAGCA  
|||||  
UACUGUCUUCUCUCUCUCGC 5'  
AT3G15270.1 645 664  
squamosa promoter binding protein-like 5

SRNA\_AG01\_SoLexa\_Mi2008\_2\_11429\_hit1  
5' CUGACAGAAGAUAGAGAGCA  
|||||  
UACUGUCUUCUCUCUCUCGC 5'  
AT3G15270.1 645 664  
squamosa promoter binding protein-like 5

SRNA\_AG01\_SoLexa\_Mi2008\_16\_50259\_hit1  
5' UUGACAGAAGAGAGUGAGCA  
|||||  
UACUGUCUUCUCUCUCUCGC 5'  
AT3G15270.1 645 664  
squamosa promoter binding protein-like 5

SRNA\_AG01\_SoLexa\_Mi2008\_122\_50263\_hit3  
5' UUGACAGAAGAUAGAGAGCA  
|||||  
UACUGUCUUCUCUCUCUCGC 5'  
AT3G15270.1 645 664  
squamosa promoter binding protein-like 5

SRNA\_AG01\_SoLexa\_Mi2008\_1\_50258\_hit1  
5' UUGACAGAAGAGAGUGAGC  
|||||  
UACUGUCUUCUCUCUCUCG 5'  
AT3G15270.1 646 664  
squamosa promoter binding protein-like 5

SRNA\_AG01\_SoLexa\_Mi2008\_21\_50262\_hit3  
5' UUGACAGAAGAUAGAGAGC  
|||||  
UACUGUCUUCUCUCUCUCG 5'  
AT3G15270.1 646 664  
squamosa promoter binding protein-like 5

SRNA\_AG01\_SoLexa\_Mi2008\_1\_11639\_hit1  
5' CUGAUUACA-AAAGUAUGAU  
|||||  
GACUAAUGUGUUU-AUACUU 5'  
AT3G15356.1 993 1011

SRNA\_AG01\_SoLexa\_Mi2008\_1\_28834\_hit1  
5' UCAUCAAGCUUGGGUGCGUUU  
|||||  
AGUAGUUCGAACC-ACG-AAG 5'  
AT3G15500.1 554 572  
putative jasmonic acid regulatory protein

SRNA\_AG01\_SoLexa\_Mi2008\_1\_7006\_hit1  
5' CAUCAUCAUCAUCACAGAAG  
|||||  
GUAGUAGUAGUAGU-UCUGG 5'

AT3G15970.1 231 249  
unknown protein

SRNA\_AG01\_SoLexa\_Mi2008\_1\_7584\_hit16  
5' CCA-AAUGCAGAAACCCAUCUU  
|| |||||  
UGUGUUACGUCUUUGGGU-GAA 5'  
AT3G16470.1 1557 1577  
putative lectin

SRNA\_AG01\_SoLexa\_Mi2008\_1\_7584\_hit16  
5' CCA-AAUGCAGAAACCCAUCUU  
|| |||||  
UGUGUUACGUCUUUGGGU-GAA 5'  
AT3G16470.2 1562 1582  
putative lectin

SRNA\_AG01\_SoLexa\_Mi2008\_1\_40210\_hit1  
5' UGGAGAAGGAAGAUGGUGAGAA  
||| |||||:||| ||  
ACCACUCCUUCUACUACU-UU 5'  
AT3G16720.1 69 89  
putative RING zinc finger protein

SRNA\_AG01\_SoLexa\_Mi2008\_1\_10010\_hit16  
5' CUACUCAACUCCGAUGUG  
||| ||||| ||||| |||  
GAUGAGUUGUAGGCU-CAC 5'  
AT3G16720.1 922 939  
putative RING zinc finger protein

SRNA\_AG01\_SoLexa\_Mi2008\_1\_15600\_hit1  
5' GUCAGAAAUUAGAUUUU  
||| ||||| |||||  
CAGUCUUUUAA--UAUAAA 5'  
AT3G17800.2 59 75  
unknown protein

SRNA\_AG01\_SoLexa\_Mi2008\_2\_15560\_hit2  
5' GUAUGAGAGGGUAACAGUU  
|| ||||| ||||| |||||  
CA-ACUCUCGCUAUUGUCAC 5'  
AT3G18215.1 226 244  
unknown protein

SRNA\_AG01\_SoLexa\_Mi2008\_5\_23592\_hit1  
5' UAGGUUUGGAGUCUCU-UUCA  
||| ||||| ||| ||| |  
AUCCAAACCUACAAAGACAACU 5'  
AT3G18290.1 3008 3029  
zinc finger protein, putative

SRNA\_AG01\_SoLexa\_Mi2008\_1\_44333\_hit1  
5' UGUAGUCCGUUGUC-UUCACA  
||| ||||| ||| |||||  
ACAUCAAGGAAAC-GCAAGUGU 5'  
AT3G18290.1 3956 3976  
zinc finger protein, putative

SRNA\_AG01\_SoLexa\_Mi2008\_2\_13419\_hit2  
5' GAAGAAGAAGAAGACACUU  
||| ||||| ||||| |||||  
CUUCUUCUUCUUCUGUGUC 5'

AT3G18290.1 395 413  
zinc finger protein, putative

SRNA\_AG01\_SoLexa\_Mi2008\_2\_51\_hit1

5' AAAAAAG-AAGAGAAACAAAGA  
||| | | | | |  
UUUUUCCUU-UCUUUUUUUCU 5'

AT3G18290.1 4111 4131  
zinc finger protein, putative

SRNA\_AG01\_SoLexa\_Mi2008\_2\_53729\_hit1

5' UUGUUAACUAUUUUACACUUC  
||| | | | | | | | :  
AACAAUUGAUAU-AUGUGAGA 5'

AT3G18290.1 4372 4391  
zinc finger protein, putative

SRNA\_AG01\_SoLexa\_Mi2008\_1\_39170\_hit3

5' UGCUAGAGAGA--AAACGACGUC  
||| | | | | | | | | | | | | | | | | | | | | | | | | | |  
ACGACCUCUCUACUUUGCUGCAG 5'

AT3G18490.1 191 213  
chloroplast nucleoid DNA-binding protein like

SRNA\_AG01\_SoLexa\_Mi2008\_2\_411\_hit5

5' AAAGAUG-AAGAGAGAAAGAGA  
||| | | | | | | | | | | | | | | | | | | | | | | | | | |  
UUUC-ACCUUCUCUCUUUCUCA 5'

AT3G18490.1 30 50  
chloroplast nucleoid DNA-binding protein like

SRNA\_AG01\_SoLexa\_Mi2008\_1\_49212\_hit1

5' UUCGACGGCGAAACGGAUCUU  
||| | | | | | | | | | | | | | | | | | | | | | | | | | |  
AAGCUGCCGCUUUGCCUAGAA 5'

AT3G18490.1 430 450  
chloroplast nucleoid DNA-binding protein like

SRNA\_AG01\_SoLexa\_Mi2008\_1\_50527\_hit1

5' UUGAGAGGCUCGAGACGAC  
||| | | | | | | | | | | | | | | | | | | | | | | | | | |  
AACUCUCCGAGGCCUCUGCUG 5'

AT3G18490.1 526 546  
chloroplast nucleoid DNA-binding protein like

SRNA\_AG01\_SoLexa\_Mi2008\_10\_52860\_hit1

5' UU-GGUAAGGGAAGAUAUCCUC  
|| | | | | | | | | | | | | | | | | | | | | | | | | | | |  
AAGCCAUUGCCUUCUAGAGGAG 5'

AT3G19620.1 1208 1229  
beta-xylosidase, putative

SRNA\_AG01\_SoLexa\_Mi2008\_1\_269\_hit2

5' AAAAUGGUGGAGAAAGAAGAG  
||| | | | | | | | | | | | | | | | | | | | | | | | | | |  
UUUU-C-AGCUCUUUCUUCUC 5'

AT3G19620.1 1884 1902  
beta-xylosidase, putative

SRNA\_AG01\_SoLexa\_Mi2008\_5\_29024\_hit1

5' UCAUGGUUUC AAGAAUGCU  
||| | | | | | | | | | | | | | | | | | | | | | | | | | |  
UGUACCAAAGUUCUUA-GA 5'

AT3G22104.1 1157 1174  
hypothetical protein, 3' partial

SRNA\_AG01\_SoLexa\_Mi2008\_1\_806\_hit1

5' AAGAGCAUCA AUGAUAGUGUU  
||||| ||||| |||  
UUCUCAUAGUUACUA-C-CAA 5'

AT3G22104.1 1167 1185  
hypothetical protein, 3' partial

SRNA\_AG01\_SoLexa\_Mi2008\_14\_49272\_hit2

5' UUCGAUGGAGAUGG-ACAAGUU  
||||| ||||| |||||  
AAGCUACCUCUACCUUGUUCUU 5'

AT3G22104.1 1331 1352  
hypothetical protein, 3' partial

SRNA\_AG01\_SoLexa\_Mi2008\_1\_38236\_hit3

5' UGCAUCUGUUGUUGGUGUUGC  
||| ||||| |||||  
ACGAAGACAACAACAACA 5'

AT3G22104.1 1739 1759  
hypothetical protein, 3' partial

SRNA\_AG01\_SoLexa\_Mi2008\_3\_4691\_hit4

5' CAAGAUGUUUUUCUUGUGG-GA  
||| ||||| ||||| ||||| ||  
GUU-UACAAAAAGAACACCACU 5'

AT3G23250.2 229 249  
myb-related transcription factor like protein

SRNA\_AG01\_SoLexa\_Mi2008\_3\_4691\_hit4

5' CAAGAUGUUUUUCUUGUGG-GA  
||| ||||| ||||| ||||| ||  
GUU-UACAAAAAGAACACCACU 5'

AT3G23250.1 230 250  
myb-related transcription factor like protein

SRNA\_AG01\_SoLexa\_Mi2008\_1\_23588\_hit1

5' UAGGUUUAGGUGGUAAUAAA  
||||| ||||| |||||  
AUCCAAAUCGACCAACUAAUUA 5'

AT3G23250.1 635 655  
myb-related transcription factor like protein

SRNA\_AG01\_SoLexa\_Mi2008\_1\_23588\_hit1

5' UAGGUUUAGGUGGUAAUAAA  
||||| ||||| |||||  
AUCCAAAUCGACCAACUAAUUA 5'

AT3G23250.2 713 733  
myb-related transcription factor like protein

SRNA\_AG01\_SoLexa\_Mi2008\_1\_45425\_hit9

5' UGUGGGUA-UGGAAUUCGGAAC  
||||| ||||| |||||  
ACACCAUCA-CUUAACCCUUG 5'

AT3G27060.1 295 315  
ribonucleotide reductase small subunit, putative

SRNA\_AG01\_SoLexa\_Mi2008\_1\_42\_hit14

5' AAAAAACAGAAAACAA-UGGAU  
||||| ||||| |||||  
UUUUUUGUCUUGUGUUAACCAA 5'

AT3G28220.1 1161 1182  
 unknown protein

SRNA\_AG01\_Solexa\_Mi2008\_1\_379\_hit1

5' AAAGAGA-AGUAUGAAAACUCA  
 ||||| | ||||| |||||  
 UUUCU-UGUCAUACUGUUGAGU 5'

AT3G28600.1 1134 1154  
 unknown protein

SRNA\_AG01\_Solexa\_Mi2008\_2\_3516\_hit21

5' AUUACCUUCACGUGCUCUUC  
 |||||:||||| ||||  
 UAAUGGAGGUGCACG-GAAGU 5'

AT3G29670.1 937 956  
 anthocyanin 5-aromatic acyltransferase, putative

SRNA\_AG01\_Solexa\_Mi2008\_1\_1776\_hit10

5' AGAAAAAAAA-AAAAAAAAAU  
 ||||| |||||  
 CAUUUUUUUUUUUUUUUUUA 5'

AT3G44260.1 916 937  
 CCR4-associated factor 1-like protein

SRNA\_AG01\_Solexa\_Mi2008\_3\_23318\_hit2

5' UAG-GUAAAAACAUCUGGUCUA  
 || ||||| |||||  
 AUCACAUUUU-GUAGACCAGAG 5'

AT3G44300.1 961 981  
 nitrilase 2

SRNA\_AG01\_Solexa\_Mi2008\_3\_23318\_hit2

5' UAG-GUAAAAACAUCUGGUCUA  
 || ||||| |||||  
 AUCACAUUUU-GUAGACCAGAG 5'

AT3G44310.2 861 881  
 nitrilase 1

SRNA\_AG01\_Solexa\_Mi2008\_3\_23318\_hit2

5' UAG-GUAAAAACAUCUGGUCUA  
 || ||||| |||||  
 AUCACAUUUU-GUAGACCAGAG 5'

AT3G44310.3 979 999  
 nitrilase 1

SRNA\_AG01\_Solexa\_Mi2008\_1\_22606\_hit1

5' UAGGAACGACGUGUACUCUUG  
 ||||| |||||  
 AUCCUUGCUGCACAUGAGAAC 5'

AT3G44720.1 1295 1315  
 chloroplast prephenate dehydratase like protein

SRNA\_AG01\_Solexa\_Mi2008\_1\_15995\_hit1

5' GUGGUAAAUGAUGGUAAGA  
 :||| |||||  
 UACCAUU-ACUACCAUUCU 5'

AT3G44720.1 87 104  
 chloroplast prephenate dehydratase like protein

SRNA\_AG01\_Solexa\_Mi2008\_1\_28151\_hit1

5' UCAGAGUCCAGAUCCCAUCAU  
 || ||:|||||  
 AG-CUUAGGUCUAGGGUAGUU 5'

AT3G46620.1 524 543  
 unknown protein

SRNA\_AG01\_Solexa\_Mi2008\_1\_14149\_hit1

5' GAGUGUGUACAC-GACGGUGU  
 |||||  
 CUCACACAUGUGUC-GCCAAA 5'

AT3G46900.1 287 306  
 copper transport protein - like protein

SRNA\_AG01\_Solexa\_Mi2008\_1\_37226\_hit1

5' UGAUGAUGAUGGUACCAUGGU  
 |||||  
 ACUACUACUACCAC--UACCA 5'

AT3G46900.1 45 63  
 copper transport protein - like protein

SRNA\_AG01\_Solexa\_Mi2008\_1\_7157\_hit1

5' CAUGAUGAUGAUGG-AACUGGU  
 |||||  
 GUACUACUACUACCACU-ACCA 5'

AT3G46900.1 45 65  
 copper transport protein - like protein

SRNA\_AG01\_Solexa\_Mi2008\_1\_3079\_hit472

5' AU-GAUGAUGAUGAUGAUGAUGA  
 || |||||  
 UAGCUACUACUACUACCACUACC 5'

AT3G46900.1 46 68  
 copper transport protein - like protein

SRNA\_AG01\_Solexa\_Mi2008\_1\_3\_hit25

5' AAAAAAAAAAAAAAGAAAGA  
 | |||||  
 UAUUUUUUUUUUUGUUUCU 5'

AT3G46900.1 503 521  
 copper transport protein - like protein

SRNA\_AG01\_Solexa\_Mi2008\_6\_35094\_hit47

5' UGAAUGUGUUUUGGGU-GAA  
 |||||  
 ACUUACACAAAA-CCAUCUA 5'

AT3G47340.2 1518 1536  
 glutamine-dependent asparagine synthetase

SRNA\_AG01\_Solexa\_Mi2008\_6\_35094\_hit47

5' UGAAUGUGUUUUGGGU-GAA  
 |||||  
 ACUUACACAAAAC-CAUCUA 5'

AT3G47340.1 1519 1537  
 glutamine-dependent asparagine synthetase

SRNA\_AG01\_Solexa\_Mi2008\_6\_35094\_hit47

5' UGAAUGUGUUUUGGGU-GAA  
 |||||  
 ACUUACACAAAA-CCAUCUA 5'

AT3G47340.3 1601 1619  
 glutamine-dependent asparagine synthetase

SRNA\_AG01\_Solexa\_Mi2008\_1\_2556\_hit1

5' AUAGAUUCAGAUUCUUCAG-GGA  
 ||| |||||  
 UAUGUAAGUCUAGAAGUAUCCU 5'

AT3G47340.3 2224 2245  
glutamine-dependent asparagine synthetase

SRNA\_AG01\_SoLexa\_Mi2008\_2\_4447\_hit2

5' CAACGAGCUGUGUUGGUCCAG  
|||||:|||||  
GUUGCUCGACACA-CAAGGUU 5'

AT3G47420.1 1522 1541  
putative sugar transporter protein

SRNA\_AG01\_SoLexa\_Mi2008\_1\_21351\_hit8

5' UAGAGGAAAUGAGUGUUUUAUCC  
||||:|||||  
AUCUUCUUUACUCACACAAUAAGG 5'

AT3G50480.1 1006 1029  
RPW8- like protein 4 (HR4)

SRNA\_AG01\_SoLexa\_Mi2008\_1\_21350\_hit1

5' UAGAGGAAAUGAGUGUAUUAU  
||||:|||||  
AUCUUCUUUACUCACACAAUA 5'

AT3G50480.1 1009 1029  
RPW8- like protein 4 (HR4)

SRNA\_AG01\_SoLexa\_Mi2008\_1\_2507\_hit3

5' AUAGAAGAAAUGAGUGUGUUU  
|||||:|||||  
\_AUCUUCUUUACUCACACAAU 5'

AT3G50480.1 1010 1030  
RPW8- like protein 4 (HR4)

SRNA\_AG01\_SoLexa\_Mi2008\_1\_37358\_hit1

5' UGAUGGGCCUUUUAUUAUGGGCAUUC  
|||||:|||||  
ACUACCCGGAAUUAUUAACCCGUAGG 5'

AT3G50480.1 905 928  
RPW8- like protein 4 (HR4)

SRNA\_AG01\_SoLexa\_Mi2008\_1\_37374\_hit5

5' UGAUGGGUCUUUUAUUAUGGGCAUCC  
|||||:|||||  
ACUACCCGGAAUUAUUAACCCGUAGG 5'

AT3G50480.1 905 928  
RPW8- like protein 4 (HR4)

SRNA\_AG01\_SoLexa\_Mi2008\_1\_42681\_hit5

5' UGGGUCUUUUAUUAUGGGCAU  
||||:|||||  
ACCCGGAAUUAUUAACCCGUA 5'

AT3G50480.1 907 925  
RPW8- like protein 4 (HR4)

SRNA\_AG01\_SoLexa\_Mi2008\_1\_37373\_hit5

5' UGAUGGGUCUUUUAUUAUGGGCAU  
|||||:|||||  
ACUACCCGGAAUUAUUAACCCGUA 5'

AT3G50480.1 907 928  
RPW8- like protein 4 (HR4)

SRNA\_AG01\_SoLexa\_Mi2008\_1\_37356\_hit1

5' UGAUGGGCCUCAUUAUUAUGGGCA  
|||||:|||||  
ACUACCCGGAAUUAUUAACCCGU 5'

AT3G50480.1 908 928  
RPW8- like protein 4 (HR4)

SRNA\_AG01\_SoLexa\_Mi2008\_5\_37357\_hit26  
5' UGAUGGGCCUUUAAUAAUGGGCA  
|||||  
ACUACCCGGAUUAUUACCCGU 5'  
AT3G50480.1 908 928  
RPW8- like protein 4 (HR4)

SRNA\_AG01\_SoLexa\_Mi2008\_1\_12412\_hit2  
5' CUUAGAUAAUGGGCCUUUAAUAA  
|||||  
GAAUCUACUACCCGGAUUAUU 5'  
AT3G50480.1 914 934  
RPW8- like protein 4 (HR4)

SRNA\_AG01\_SoLexa\_Mi2008\_1\_42239\_hit4  
5' UGGGCUUAGAUGAUGGGUCUUUU  
|||||:|||||  
ACCCGAAUCUACUACCCGGAUUA 5'  
AT3G50480.1 916 938  
RPW8- like protein 4 (HR4)

SRNA\_AG01\_SoLexa\_Mi2008\_2\_42236\_hit1  
5' UGGGCUUAGAUGAUGGACCUU  
|||||  
ACCCGAAUCUACUACCCGGA 5'  
AT3G50480.1 918 938  
RPW8- like protein 4 (HR4)

SRNA\_AG01\_SoLexa\_Mi2008\_2\_42238\_hit4  
5' UGGGCUUAGAUGAUGGGUCUU  
|||||:|||  
ACCCGAAUCUACUACCCGGA 5'  
AT3G50480.1 918 938  
RPW8- like protein 4 (HR4)

SRNA\_AG01\_SoLexa\_Mi2008\_2\_42237\_hit4  
5' UGGGCUUAGAUGAUGGGUCU  
|||||:||  
ACCCGAAUCUACUACCCGGA 5'  
AT3G50480.1 919 938  
RPW8- like protein 4 (HR4)

SRNA\_AG01\_SoLexa\_Mi2008\_1\_14303\_hit4  
5' GAUGGGCUUAGAUGAUGGGUCU  
|||||:||  
CUACCCGAAUCUACUACCCGGA 5'  
AT3G50480.1 919 940  
RPW8- like protein 4 (HR4)

SRNA\_AG01\_SoLexa\_Mi2008\_4\_37363\_hit4  
5' UGAUGGGCCUUAGAUGAUGGGU  
|||||:  
ACUACCCGAAUCUACUACCCG 5'  
AT3G50480.1 921 941  
RPW8- like protein 4 (HR4)

SRNA\_AG01\_SoLexa\_Mi2008\_1\_37364\_hit1  
5' UGAUGGGCCUUAGAUGAUUGGC  
|||||  
ACUACCCGAAUCUACU-ACCC 5'

AT3G50480.1 923 942  
RPW8- like protein 4 (HR4)

SRNA\_AG01\_SoLexa\_Mi2008\_3\_14257\_hit30

5' GAUGAUGGGCUUAGAUGAU  
|||||  
CUACUACCCGAAUCUACUA 5'  
AT3G50480.1 925 943  
RPW8- like protein 4 (HR4)

SRNA\_AG01\_SoLexa\_Mi2008\_1\_21813\_hit1

5' UAGAUGAUGGACUUCGAUGAU  
|||||  
AUCUACUACCCGAAUCUACUA 5'  
AT3G50480.1 925 945  
RPW8- like protein 4 (HR4)

SRNA\_AG01\_SoLexa\_Mi2008\_6\_21815\_hit1

5' UAGAUGAUGGGCUUAAAUGAU  
|||||  
AUCUACUACCCGAAUCUACUA 5'  
AT3G50480.1 925 945  
RPW8- like protein 4 (HR4)

SRNA\_AG01\_SoLexa\_Mi2008\_5\_21816\_hit30

5' UAGAUGAUGGGCUUAGAUGAU  
|||||  
AUCUACUACCCGAAUCUACUA 5'  
AT3G50480.1 925 945  
RPW8- like protein 4 (HR4)

SRNA\_AG01\_SoLexa\_Mi2008\_1\_21817\_hit1

5' UAGAUGAUGGGUUUAGAUGAU  
|||||:|||||  
AUCUACUACCCGAAUCUACUA 5'  
AT3G50480.1 925 945  
RPW8- like protein 4 (HR4)

SRNA\_AG01\_SoLexa\_Mi2008\_1\_10162\_hit2

5' CUAGAUGAUGGACUAGAUGA  
|||||  
GAUCUACUACCCGAAUCUACU 5'  
AT3G50480.1 926 946  
RPW8- like protein 4 (HR4)

SRNA\_AG01\_SoLexa\_Mi2008\_6\_10164\_hit27

5' CUAGAUGAUGGGCUUAGAUGA  
|||||  
GAUCUACUACCCGAAUCUACU 5'  
AT3G50480.1 926 946  
RPW8- like protein 4 (HR4)

SRNA\_AG01\_SoLexa\_Mi2008\_1\_32880\_hit27

5' UCUAGAUGAUGGGCUUAGAUGA  
|||||  
AGAUCUACUACCCGAAUCUACU 5'  
AT3G50480.1 926 947  
RPW8- like protein 4 (HR4)

SRNA\_AG01\_SoLexa\_Mi2008\_7\_10163\_hit27

5' CUAGAUGAUGGGCUUAGAUG  
|||||  
GAUCUACUACCCGAAUCUAC 5'

AT3G50480.1 927 946  
RPW8- like protein 4 (HR4)

SRNA\_AG01\_SoLexa\_Mi2008\_2\_32879\_hit27  
5' UCUAGAUGAUGGGCUUAGAUG  
|||||  
AGAUCUACUACCCGAAUCUAC 5'  
AT3G50480.1 927 947  
RPW8- like protein 4 (HR4)

SRNA\_AG01\_SoLexa\_Mi2008\_1\_20757\_hit22  
5' UAGAAACAUCUAGAUGAUGGGCUU  
|||||  
AUCUUUGUAGAUCUACUACCCGAA 5'  
AT3G50480.1 932 955  
RPW8- like protein 4 (HR4)

SRNA\_AG01\_SoLexa\_Mi2008\_1\_19030\_hit3  
5' UACAAACAUCUAGAUGAUGGGCU  
|| |||||  
AUCUUUGUAGAUCUACUACCCGA 5'  
AT3G50480.1 933 955  
RPW8- like protein 4 (HR4)

SRNA\_AG01\_SoLexa\_Mi2008\_5\_10081\_hit25  
5' CUAGAAACAUCUAGAUGAUGG  
|||||  
GAUCUUUGUAGAUCUACUACC 5'  
AT3G50480.1 936 956  
RPW8- like protein 4 (HR4)

SRNA\_AG01\_SoLexa\_Mi2008\_4\_14880\_hit24  
5' GGAGUACAAGGAAAGGGUA  
|||||  
CCUCAUGUCCUUUCCCAU 5'  
AT3G50480.1 962 980  
RPW8- like protein 4 (HR4)

SRNA\_AG01\_SoLexa\_Mi2008\_1\_23502\_hit2  
5' UAGGUGUACAAGGAAAGGGUA  
|||| |||||  
AUCCUCAUGUCCUUUCCCAU 5'  
AT3G50480.1 962 982  
RPW8- like protein 4 (HR4)

SRNA\_AG01\_SoLexa\_Mi2008\_5\_24584\_hit2  
5' UAUAGGUGUACAAGGAAAGGGU  
||||| |||||  
AUAUCCUCAUGUCCUUUCCCA 5'  
AT3G50480.1 963 984  
RPW8- like protein 4 (HR4)

SRNA\_AG01\_SoLexa\_Mi2008\_1\_22768\_hit2  
5' UAGGAGUACAAGGAAAAGGGU  
||||| |||||  
AUCCUCAUGUCCUU-UCCCA 5'  
AT3G50480.1 964 983  
RPW8- like protein 4 (HR4)

SRNA\_AG01\_SoLexa\_Mi2008\_1\_2590\_hit4  
5' AUAGGAGUACAAGGAAAAGG  
|||||  
UAUCCUCAUGUCCUU-UCC 5'

AT3G50480.1 966 984  
 RPW8- like protein 4 (HR4)

SRNA\_AG01\_SoLexa\_Mi2008\_1\_54542\_hit29

5' UUUUAUAUAGGAGUACAAGGAA  
 |||  
 AAUAUAUCCUCAUGUCCUU 5'  
 AT3G50480.1 968 988  
 RPW8- like protein 4 (HR4)

SRNA\_AG01\_SoLexa\_Mi2008\_1\_35975\_hit2

5' UGAGAUGAGUGACCAUGGCUGU  
 |||: |||  
 ACUCUACUAACCGGUACCGACG 5'  
 AT3G50930.1 1239 1260  
 BCS1 protein-like protein

SRNA\_AG01\_SoLexa\_Mi2008\_2\_35974\_hit2

5' UGAGAUGAGUGACCAUGGCU  
 ||| |||  
 ACUCUACUAACCGGUACCGA 5'  
 AT3G50930.1 1241 1260  
 BCS1 protein-like protein

SRNA\_AG01\_SoLexa\_Mi2008\_1\_24431\_hit2

5' UAUA-GACAUGUGGAUGAUGCAC  
 ||| |||  
 AUAUGCUGUACACCUAC-ACGUA 5'  
 AT3G50930.1 1585 1606  
 BCS1 protein-like protein

SRNA\_AG01\_SoLexa\_Mi2008\_6\_24430\_hit2

5' UAUA-GACAUGUGGAUGAUGCA  
 ||| |||  
 AUAUGCUGUACACCUAC-ACGU 5'  
 AT3G50930.1 1586 1606  
 BCS1 protein-like protein

SRNA\_AG01\_SoLexa\_Mi2008\_1\_24432\_hit1

5' UAUA-GACAUGUGGAUGAUGC  
 ||| |||:  
 AUAUGCUGUACACCUAC-ACGU 5'  
 AT3G50930.1 1586 1606  
 BCS1 protein-like protein

SRNA\_AG01\_SoLexa\_Mi2008\_23\_6153\_hit2

5' CAGAUCUUGGUGG-UAG-UAGC  
 ||| |||  
 GUCUAGAACCACCGAUCUAUCC 5'  
 AT3G50930.1 671 692  
 BCS1 protein-like protein

SRNA\_AG01\_SoLexa\_Mi2008\_2\_43473\_hit2

5' UGGUGGAUGUAUUUGAAU-CAU  
 ||| |||  
 ACCUCCUACACAAACUUAGGUA 5'  
 AT3G51730.1 955 976  
 unknown protein

SRNA\_AG01\_SoLexa\_Mi2008\_1\_3398\_hit2

5' AUGGUGGAUGUAUUUGAAU-CAU  
 ||| |||  
 UACCUCCUACACAAACUUAGGUA 5'

AT3G51730.1 955 977  
unknown protein

SRNA\_AG01\_SoLexa\_Mi2008\_1\_49005\_hit4  
5' UUCCA-GUGAAGCAAGAAACUGA  
||||| || | |||||  
AAGGUGCAGU-CGUUCUUUGACU 5'  
AT3G53950.1 694 715  
unknown protein

SRNA\_AG01\_SoLexa\_Mi2008\_1\_50463\_hit1  
5' UUGAGAAACAAG-UUGUCUGCA  
||||| |||||  
AACUCUUUGUUCGAACA-ACGA 5'  
AT3G55610.2 1578 1598  
delta-1-pyrroline-5-carboxylate synthetase

SRNA\_AG01\_SoLexa\_Mi2008\_9\_14634\_hit2  
5' GCCU-AUCCUCAGAAUCGCU  
||||| ||||| |||||  
CGGAGUAGGAGUCGUAGCGA 5'  
AT3G55610.2 530 549  
delta-1-pyrroline-5-carboxylate synthetase

SRNA\_AG01\_SoLexa\_Mi2008\_3\_6076\_hit1  
5' CA-GAGGGAGAUGAAAGAAUU  
|| | ||||| |||||  
GUAC-CCCUCUAAUUUCUUA 5'  
AT3G55970.1 377 396  
leucoanthocyanidin dioxygenase -like protein

SRNA\_AG01\_SoLexa\_Mi2008\_1\_42962\_hit1  
5' UGGUAGUAGAGAUAAUAGUAU  
|||||:| |||||  
ACCAUUACCUCUAAUUAUCAUC 5'  
AT3G55970.1 491 511  
leucoanthocyanidin dioxygenase -like protein

SRNA\_AG01\_SoLexa\_Mi2008\_1\_5113\_hit1  
5' CAAUCCGAGAGAUUCGA-UGUCC  
||||| ||||| |||||  
GUUAGGCUCUCUAAGCUGACACC 5'  
AT3G55980.1 1623 1645  
unknown protein

SRNA\_AG01\_SoLexa\_Mi2008\_1\_35795\_hit1  
5' UGAG-AAGAUUAUGGGUUUCGG  
||||| |||||:||||| ||  
ACUCCUUCUAAUUAUCCAAA-CC 5'  
AT3G56060.1 7 27  
mandelonitrile lyase-like protein

SRNA\_AG01\_SoLexa\_Mi2008\_5\_1114\_hit1  
5' AAUG-GAACUAGUGGACAAACAA  
||||| ||||| |||||  
UUACUCUUGAUCACCUAAUUUGUG 5'  
AT3G56970.1 840 862  
putative bHLH transcription factor (bHLH038)

SRNA\_AG01\_SoLexa\_Mi2008\_1\_48516\_hit1  
5' UUCAAGGAAGAUUGGACCAGU  
||||| ||||| |||:|  
AAGUCCUUCUAACC-GGUUA 5'

AT3G57170.1 1048 1067  
 unknown protein

SRNA\_AG01\_SoLexa\_Mi2008\_3\_45808\_hit1  
 5' UGUUAAAAGAAGAUGGAACAAG  
 |||||  
 ACAUUUCUUCUA--UAGUUC 5'  
 AT3G57170.1 857 875  
 unknown protein

SRNA\_AG01\_SoLexa\_Mi2008\_2\_13688\_hit1  
 5' GACCAUUUGUGAGAAGAGA  
 |||||  
 CUGGUAACACUCUUCUCU 5'  
 AT3G57230.2 585 603  
 MADS-box transcription factor (AGL16)

SRNA\_AG01\_SoLexa\_Mi2008\_596\_13689\_hit1  
 5' GACCAUUUGUGAGAAGGGA  
 |||||:|  
 CUGGUAACACUCUUCUCU 5'  
 AT3G57230.2 585 603  
 MADS-box transcription factor (AGL16)

SRNA\_AG01\_SoLexa\_Mi2008\_72\_1853\_hit1  
 5' AGACCAUUUGUGAGAAGGGA  
 |||||:|  
 UCUGGUAACACUCUUCUCU 5'  
 AT3G57230.2 585 604  
 MADS-box transcription factor (AGL16)

SRNA\_AG01\_SoLexa\_Mi2008\_3321\_21060\_hit1  
 5' UAGACCAUUUGUGAGAAGGGA  
 |||||:|  
 AUCUGGUAACACUCUUCUCU 5'  
 AT3G57230.2 585 605  
 MADS-box transcription factor (AGL16)

SRNA\_AG01\_SoLexa\_Mi2008\_2\_10113\_hit1  
 5' CUAGACCAUUUGUGAGAAGGGA  
 |||||:|  
 GAUCUGGUAACACUCUUCUCU 5'  
 AT3G57230.2 585 606  
 MADS-box transcription factor (AGL16)

SRNA\_AG01\_SoLexa\_Mi2008\_32\_21059\_hit1  
 5' UAGACCAUUUGUGAGAAGGG  
 |||||:|  
 AUCUGGUAACACUCUUCUC 5'  
 AT3G57230.2 586 605  
 MADS-box transcription factor (AGL16)

SRNA\_AG01\_SoLexa\_Mi2008\_37\_21058\_hit1  
 5' UAGACCAUUUGUGAGAAGG  
 |||||:  
 AUCUGGUAACACUCUUCU 5'  
 AT3G57230.2 587 605  
 MADS-box transcription factor (AGL16)

SRNA\_AG01\_SoLexa\_Mi2008\_2\_13688\_hit1  
 5' GACCAUUUGUGAGAAGAGA  
 |||||  
 CUGGUAACACUCUUCUCU 5'

AT3G57230.1 588 606  
MADS-box transcription factor (AGL16)

SRNA\_AG01\_SoLexa\_Mi2008\_596\_13689\_hit1  
5' GACCAUUUGUGAGAAGGGA  
|||||||:|  
CUGGUAAACACUCUUCUCU 5'

AT3G57230.1 588 606  
MADS-box transcription factor (AGL16)

SRNA\_AG01\_SoLexa\_Mi2008\_72\_1853\_hit1  
5' AGACCAUUUGUGAGAAGGGA  
|||||||:|  
UCUGGUAAACACUCUUCUCU 5'

AT3G57230.1 588 607  
MADS-box transcription factor (AGL16)

SRNA\_AG01\_SoLexa\_Mi2008\_3321\_21060\_hit1  
5' UAGACCAUUUGUGAGAAGGGA  
|||||||:|  
AUCUGGUAAACACUCUUCUCU 5'

AT3G57230.1 588 608  
MADS-box transcription factor (AGL16)

SRNA\_AG01\_SoLexa\_Mi2008\_2\_10113\_hit1  
5' CUAGACCAUUUGUGAGAAGGGA  
|||||||:|  
GAUCUGGUAAACACUCUUCUCU 5'

AT3G57230.1 588 609  
MADS-box transcription factor (AGL16)

SRNA\_AG01\_SoLexa\_Mi2008\_32\_21059\_hit1  
5' UAGACCAUUUGUGAGAAGGG  
|||||||:|  
AUCUGGUAAACACUCUUCUC 5'

AT3G57230.1 589 608  
MADS-box transcription factor (AGL16)

SRNA\_AG01\_SoLexa\_Mi2008\_37\_21058\_hit1  
5' UAGACCAUUUGUGAGAAGG  
|||||||:  
AUCUGGUAAACACUCUUCU 5'

AT3G57230.1 590 608  
MADS-box transcription factor (AGL16)

SRNA\_AG01\_SoLexa\_Mi2008\_1\_37480\_hit2  
5' UGAUGUG-G-GAGAUGAGAAUGU  
||||| | |||||  
UCUACACUCACUCUACUCUACA 5'

AT3G57510.1 33 55  
endo-polygalacturonase

SRNA\_AG01\_SoLexa\_Mi2008\_1\_27213\_hit1  
5' UCAAGGCUAGAGAACAUUUGGA  
|||:| ||| |||||  
AGUUUC-AUCUGUUGUAAACCU 5'

AT3G59210.1 1073 1093  
unknown protein

SRNA\_AG01\_SoLexa\_Mi2008\_2\_13650\_hit1  
5' GACAUCCAGAUAGAAGCUUU  
||| ||| |||||  
CUGUUGGUCUUCUUCGAAA 5'

AT3G59210.1 913 932  
unknown protein

SRNA\_AG01\_SoLexa\_Mi2008\_4\_35304\_hit1

5' UGACAUCCAGAUAGAAGCUUU  
 ||||| ||||| ||||| |||||  
 CCUGUUGGUCUUUCUUCGAAA 5'  
 AT3G59210.1 913 933  
unknown protein

SRNA\_AG01\_SoLexa\_Mi2008\_1\_52192\_hit1

5' UUGGAUCAACAAACUGAUGG  
 ||||| ||||| ||||| ||  
 AACCUAGUUCUUUGAC-ACA 5'  
 AT3G59900.1 35 53  
putative protein

SRNA\_AG01\_SoLexa\_Mi2008\_1\_18400\_hit1

5' UAAGGUUCGUUGAUUGUUGUC  
 ||||| ||||| ||||| |||||  
 AUUCCAAGCAACUAACAACAG 5'  
 AT3G60140.1 647 667  
beta-glucosidase

SRNA\_AG01\_SoLexa\_Mi2008\_1\_24287\_hit1

5' UAUAAAGGUUCGUUGAUUGUUGUC  
 ||||| ||||| ||||| |||||  
 AUUUCCAAGCAACUAACAACAG 5'  
 AT3G60140.1 647 669  
beta-glucosidase

SRNA\_AG01\_SoLexa\_Mi2008\_2\_44860\_hit1

5' UGUCUUUAGAGAUCUCAAACGU  
 ||||| ||||| ||||| ||  
 ACAGAAAACUCUAAAGUUU-CA 5'  
 AT3G60140.1 6 26  
beta-glucosidase

SRNA\_AG01\_SoLexa\_Mi2008\_1\_47622\_hit1

5' UUAGCUACACAA-AGUAUUGAU  
 ||||| ||||| ||||| |||||  
 AAUCGAUGU-UUCUCAUAACUU 5'  
 AT3G61890.1 919 939  
homeobox-leucine zipper protein ATHB-12

SRNA\_AG01\_SoLexa\_Mi2008\_1\_49005\_hit4

5' UUCCAGUGAAGCAAGAAACUGA  
 ||| | ||||| ||||| |||||  
 AAG-UGACUUCGUUCUUUGACG 5'  
 AT4G01080.1 466 486  
unknown protein (At4g01080)

SRNA\_AG01\_SoLexa\_Mi2008\_21\_12055\_hit2

5' CUGGUAGUGUGAAGUU-UGA  
 |||:||||| ||||| |||||  
 GACUAUCACACUUC AACACU 5'  
 AT4G01080.1 628 647  
unknown protein (At4g01080)

SRNA\_AG01\_SoLexa\_Mi2008\_1\_45014\_hit1

5' UGUGAUAGUGUGAAGUUUGUGA  
 ||||| ||||| ||||| |||||  
 ACACUAUCACACUUC AA-CACU 5'

AT4G01080.1 628 648  
unknown protein (At4g01080)

SRNA\_AG01\_SoLexa\_Mi2008\_1\_44646\_hit1

5' UGUCCUAAACGAAGCGGUGGU  
|||||  
ACAGGAUUUGCUUCGCCACCA 5'

AT4G01410.1 538 558  
putative hypersensitive response protein

SRNA\_AG01\_SoLexa\_Mi2008\_1\_44726\_hit1

5' UGUCGAUUGAUUUACCGU--GGA  
|||||  
ACAGCUAACUAAAUGGCAGGCCU 5'

AT4G01870.1 1374 1396  
unknown protein

SRNA\_AG01\_SoLexa\_Mi2008\_5\_11906\_hit6

5' CUGGAGCUACGGGAA-CUGCUG  
|||||  
GACCUCGAGGCCCUUAGACGAG 5'

AT4G01870.1 247 268  
unknown protein

SRNA\_AG01\_SoLexa\_Mi2008\_33\_11834\_hit6

5' CUGCUGGAGCUACGGGAA-CUG  
|| |||||  
GA-GACCUCGAGGCCCUUAGAC 5'

AT4G01870.1 250 270  
unknown protein

SRNA\_AG01\_SoLexa\_Mi2008\_1\_13362\_hit1

5' GAAAUUGCUCUAAGUCUCCUAG  
: ||| ||| |||||  
UUUU-CGACAUUCAGAGGAUC 5'

AT4G02280.1 1858 1877  
putative sucrose synthetase

SRNA\_AG01\_SoLexa\_Mi2008\_11\_14066\_hit1

5' GA-GGAGUUGAAUAUCUGUUCA  
|| ||| |||||  
CUACCUGAACUUUAAAACAAGU 5'

AT4G02520.1 489 510  
Atpm24.1 glutathione S transferase

SRNA\_AG01\_SoLexa\_Mi2008\_1\_15664\_hit1

5' GUCCGGUUUUGGAUACGUG  
|||||:|||||  
CAGGCCAAAACCUUGGCAC 5'

AT4G03060.1 1166 1184  
putative oxidoreductase

SRNA\_AG01\_SoLexa\_Mi2008\_1\_23752\_hit1

5' UAGUCCGGUUUUGGAUACGUG  
|||||:|||||  
AUCAGGCCAAAACCUUGGCAC 5'

AT4G03060.1 1166 1186  
putative oxidoreductase

SRNA\_AG01\_SoLexa\_Mi2008\_30\_46350\_hit1

5' UUAACACCAACAACGAGAUC-GU  
|||||:|||||  
AAUUGUGGUUGUGGUUCUAGUCA 5'

AT4G03060.1 826 848  
putative oxidoreductase

SRNA\_AG01\_SoLexa\_Mi2008\_1\_14952\_hit2

5' GGCACGUGCUGAUUGUU-GUU  
:||||| ||||| ||||| |||||  
UCGUG-ACGACUAACAACCAA 5'  
AT4G04460.1 1315 1334  
putative aspartic protease

SRNA\_AG01\_SoLexa\_Mi2008\_1\_13343\_hit1

5' GAA-AGGAGCAAGAUUGAUUGG  
||| | ||||| ||||| |||||  
CUUGUGCUCGUUCUACUAACC 5'  
AT4G04460.1 72 93  
putative aspartic protease

SRNA\_AG01\_SoLexa\_Mi2008\_1\_1786\_hit1

5' AGAA-AGGAGCAAGAUUGAUUGG  
|||| | ||||| ||||| |||||  
UCUUGUGCUCGUUCUACUAACC 5'  
AT4G04460.1 72 94  
putative aspartic protease

SRNA\_AG01\_SoLexa\_Mi2008\_1\_51110\_hit1

5' UUGAUGAUGAUCACAGUUGUGU  
||||| ||||| ||||| |||||  
AACUACUACUAGUC-CAAC-CA 5'  
AT4G04830.1 1 20  
Unknown protein

SRNA\_AG01\_SoLexa\_Mi2008\_1\_30428\_hit1

5' UCGAACUUCGUGUGUAGAU  
||||| ||||| ||||| |||||  
AGCUUGAAGCAC-CAACUAA 5'  
AT4G04830.1 222 240  
Unknown protein

SRNA\_AG01\_SoLexa\_Mi2008\_1\_14057\_hit1

5' GAGGAGAAGCAGAAGCAAG-UU  
||||| ||||| ||||| |||||  
CUCCUGUUCGUCUUCG-UCGAA 5'  
AT4G08950.1 848 868  
putative phi-1-like phosphate-induced protein

SRNA\_AG01\_SoLexa\_Mi2008\_1\_24907\_hit1

5' UAUCAUCUACGAGGUCAGUCA  
||||| ||||| ||||| |||||  
AUAGUAGUUGCUCAGUCAA 5'  
AT4G11130.1 3024 3044  
putative RNA-directed RNA polymerase

SRNA\_AG01\_SoLexa\_Mi2008\_1\_1044\_hit2

5' AAUCCUGAUGAUG-CUGCAU  
||||| ||||| ||||| |||||  
UUAGGACUACUACUGAGGUA 5'  
AT4G12560.2 1555 1574  
putative protein

SRNA\_AG01\_SoLexa\_Mi2008\_1\_13548\_hit2

5' GAAUCCUGAUGAUG-CUGCAU  
:||||| ||||| ||||| |||||  
UUUAGGACUACUACUGAGGUA 5'

AT4G12560.2 1555 1575  
putative protein

SRNA\_AG01\_SoLexa\_Mi2008\_2\_1701\_hit3

5' ACUCAAGAGAUGAU-AUAAA  
|||  
AUAGUUCUCUACUUAUUUUU 5'

AT4G12560.2 653 672  
putative protein

SRNA\_AG01\_SoLexa\_Mi2008\_1\_14470\_hit10

5' GCAGC-CCGACGUAAUCAGA  
|||:| |||  
CGUUGCGGCUGCAUUAGUCU 5'

AT4G12570.1 329 348  
polyubiquitin-like protein

SRNA\_AG01\_SoLexa\_Mi2008\_1\_34211\_hit3

5' UGAAAGAGAGAUGAGAGCUUU  
||| |||  
UAUUUCU-UCUACUCUCGAAA 5'

AT4G14130.1 18 37  
xyloglucan endotransglycosylase-related protein XTR-7

SRNA\_AG01\_SoLexa\_Mi2008\_1\_41698\_hit1

5' UGGGAAAGGA-CAGCCUAGCUUC  
||| ||| |||  
ACCCUUCCUUG-CGGCUCGAAG 5'

AT4G14130.1 601 622  
xyloglucan endotransglycosylase-related protein XTR-7

SRNA\_AG01\_SoLexa\_Mi2008\_4\_11303\_hit6

5' CUCUUGGGGAAAGGAAUUCGC  
||| ||| |||  
GAGAAACCCUUCCUU--GCG 5'

AT4G14130.1 609 627  
xyloglucan endotransglycosylase-related protein XTR-7

SRNA\_AG01\_SoLexa\_Mi2008\_16\_13755\_hit1

5' GACGAUAAGCAUUGGCAUU  
: ||| |||  
UUGCUAUUCGUAACUGUAA 5'

AT4G14365.1 281 299  
C3HC4-type zinc finger ankyrin repeat protein - like

SRNA\_AG01\_SoLexa\_Mi2008\_1\_166\_hit3

5' AAAAGAAACAGAAGAGAAUGCU  
||| |||: ||| |||  
UUUUCUUUGUC-UCUUUUA-GA 5'

AT4G14880.2 1255 1274  
cytosolic O-acetylserine(thiol)lyase (EC 4.2.99.8)

SRNA\_AG01\_SoLexa\_Mi2008\_1\_166\_hit3

5' AAAAGAAACAGAAGAGAAUGCU  
||| |||: ||| |||  
UUUUCUUUGUC-UCUUUUA-GA 5'

AT4G14880.1 1258 1277  
cytosolic O-acetylserine(thiol)lyase (EC 4.2.99.8)

SRNA\_AG01\_SoLexa\_Mi2008\_2\_7120\_hit1

5' CAUGAAUUUGAGGUUUACAG  
||| |||: ||| |||  
GUA-UUGAACUCCAAAUGUG 5'

AT4G16000.1 323 341  
 unknown protein

SRNA\_AG01\_SoLexa\_Mi2008\_1\_29469\_hit1

5' UCCAGCGGCUAUUAGGAUGGG  
 ||||| |||||  
 AGGUCCCCGAUAAUCCACCA 5'

AT4G16370.1 1711 1731  
 isp4 like protein

SRNA\_AG01\_SoLexa\_Mi2008\_1\_29468\_hit1

5' UCCAGCGGCUAUUAGGAUGGG  
 ||||| |||||  
 AGGUCCCCGAUAAUCCACC 5'

AT4G16370.1 1712 1731  
 isp4 like protein

SRNA\_AG01\_SoLexa\_Mi2008\_12\_20785\_hit2

5' UAGAAAGGGCAAUAUACACGUG  
 ||||| ||||| | ||| |||  
 AUCUUUCCCGUU-U-UGUACAC 5'

AT4G16370.1 2273 2292  
 isp4 like protein

SRNA\_AG01\_SoLexa\_Mi2008\_1\_26506\_hit1

5' UAUU-U-UAGUGUUCAGAAGA  
 |||| | | |||||  
 AUAACAGAGCACAAGUCUUCU 5'

AT4G17470.1 995 1015  
 putative protein

SRNA\_AG01\_SoLexa\_Mi2008\_5\_2843\_hit1

5' AUCCGCCGUUACCGCCGCC  
 |||||:|||||  
 GCGGCGGCAGUGGCGGCGG 5'

AT4G17500.1 491 509  
 ethylene responsive element binding factor 1 (frameshift !)

SRNA\_AG01\_SoLexa\_Mi2008\_1\_34614\_hit1

5' UGAAGAUGAAGUCAUCAUUG  
 |||||:||||| |||||  
 ACUUCUAUUUCAGUACUAAC 5'

AT4G18360.2 352 371  
 glycolate oxidase - like protein

SRNA\_AG01\_SoLexa\_Mi2008\_2\_56179\_hit1

5' UUUGUUACUGGAGAACGUUUCU  
 ||||| | |||||  
 AAACACUAACCUCUUGCAA-GA 5'

AT4G19170.1 166 186  
 neoxanthin cleavage enzyme-like protein

SRNA\_AG01\_SoLexa\_Mi2008\_1\_336\_hit2

5' AAAGAAAAAA-AAGUAUUGA  
 ||||| || |||||  
 UUUUUUUUUUAU-AUAAGU 5'

AT4G19170.1 1996 2015  
 neoxanthin cleavage enzyme-like protein

SRNA\_AG01\_SoLexa\_Mi2008\_2\_52173\_hit1

5' UUGGAGUGUCGUGGGUUUGUU  
 ||||| |||||  
 CACCUCACAAAACCCAAACAA 5'

AT4G19170.1 211 231  
neoxanthin cleavage enzyme-like protein

SRNA\_AG01\_SoLexa\_Mi2008\_1\_45665\_hit1

5' UGUG-UGAAGAGAGAAUGAUGG  
||||| ||||||||| |||||  
ACACUACUUCUCUCUAC-ACC 5'

AT4G19170.1 84 104  
neoxanthin cleavage enzyme-like protein

SRNA\_AG01\_SoLexa\_Mi2008\_1\_53254\_hit1

5' UUGGUUUGGGUUUUGUU-CUAA  
||||||| ||||| |||  
AACCAAACCCA-AACAAUGAUA 5'

AT4G19430.1 143 163  
unknown protein

SRNA\_AG01\_SoLexa\_Mi2008\_1\_14875\_hit1

5' GGAGGUGGAGGCGGUGG-UGGU  
: ||||||||| |||||  
UGUCCACCUCCGCCACCAACCA 5'

AT4G22470.1 207 228  
extensin - like protein

SRNA\_AG01\_SoLexa\_Mi2008\_2\_43577\_hit1

5' UGGUGGUGGUGACG-UUGGUGGU  
||||||| || ||| |||||  
ACCACCACCACU-CUAACAACCA 5'

AT4G22470.1 778 799  
extensin - like protein

SRNA\_AG01\_SoLexa\_Mi2008\_1\_43578\_hit1

5' UGGUGGUGGUGAUGAUGUGUC  
||||||| ||| |||  
ACCACCACCACU-CUA-ACAA 5'

AT4G22470.1 781 799  
extensin - like protein

SRNA\_AG01\_SoLexa\_Mi2008\_1\_7157\_hit1

5' CAUGAUGAUGAUGGAACUGGU  
||||||| ||||| |||||  
CUACUACUACUCCUUUACCA 5'

AT4G22490.1 57 77  
Rcc3- like protein

SRNA\_AG01\_SoLexa\_Mi2008\_1\_3079\_hit472

5' AUGAUGAUGAUGAUGAUGAUGA  
||||| || |||||||||  
GACUACUCCUCCUACUACU 5'

AT4G22490.1 67 88  
Rcc3- like protein

SRNA\_AG01\_SoLexa\_Mi2008\_1\_45036\_hit1

5' UGUGAUGAGGAGGAUGAUGAA  
||||||| |||||||||  
CGACUACUCCUCCUACUACUA 5'

AT4G22490.1 69 89  
Rcc3- like protein

SRNA\_AG01\_SoLexa\_Mi2008\_1\_50495\_hit1

5' UUGAGACCCGACGCGAUGGC  
||||||| |||||  
AACUCUGGGCUG-GCUACGA 5'

AT4G25000.1 760 778  
alpha-amylase like protein

SRNA\_AG01\_Solexa\_Mi2008\_1\_9617\_hit1

5' CUAAGAAACAACGAGGUGUCU  
 |||||  
 GAUUCUUUGUUG-UCGAC-GA 5'  
 AT4G27080.1 45 63  
 unknown protein

SRNA\_AG01\_Solexa\_Mi2008\_1\_14399\_hit1

5' GCAAAAUGCGAAUCGAUGG  
 |  
 CCUUUUACGCUUACCUACC 5'  
 AT4G27080.1 747 765  
 unknown protein

SRNA\_AG01\_Solexa\_Mi2008\_1\_50088\_hit1

5' UUGAAGGAUCAUCAGUGUGAAA  
 |||||  
 AACUCCUAGUA-UCACUCUUG 5'  
 AT4G27710.1 1520 1540  
 cytochrome P450 - like protein

SRNA\_AG01\_Solexa\_Mi2008\_7\_8338\_hit9

5' CGAAGG-UGCAUAGUGAGAA  
 ||||| |  
 UCUUCCUA-GUAUCACUCUU 5'  
 AT4G27710.1 1521 1539  
 cytochrome P450 - like protein

SRNA\_AG01\_Solexa\_Mi2008\_1\_1573\_hit9

5' ACGAAGG-UGCAUAGUGAGAA  
 |  
 UUCUCCUA-GUAUCACUCUU 5'  
 AT4G27710.1 1521 1540  
 cytochrome P450 - like protein

SRNA\_AG01\_Solexa\_Mi2008\_1\_50087\_hit1

5' UUGAAGGAUCAUCAGUGUGAA  
 |||||  
 AACUCCUAGUA-UCACUCUU 5'  
 AT4G27710.1 1521 1540  
 cytochrome P450 - like protein

SRNA\_AG01\_Solexa\_Mi2008\_1\_15358\_hit4

5' GUAAAUGGGAUGGAGAACAAA  
 |||||:  
 AAUUUACCUUAGCUCUUGUUU 5'  
 AT4G27810.1 100 120  
 hypothetical protein

SRNA\_AG01\_Solexa\_Mi2008\_1\_43726\_hit3

5' UGGUUAAGGAGAUAGACUUGA  
 |||||  
 ACCAAAUC-UCUAUCUGAACC 5'  
 AT4G28490.1 86 105  
 receptor-like protein kinase 5 precursor (RLK5)

SRNA\_AG01\_Solexa\_Mi2008\_3\_36318\_hit1

5' UGAGGAUGACUAUGGUGAUGAG  
 |||  
 ACUACUACUGUUACCACUACUA 5'

AT4G28530.2 798 819  
 NAM / CUC2 -like protein

SRNA\_AG01\_SoLexa\_Mi2008\_3\_36318\_hit1

5' UGAGGAUGACUAUGGUGAUGAG  
 ||| ||||| |||||  
 ACUACUACUGUUACCACUACUA 5'

AT4G28530.1 909 930  
 NAM / CUC2 -like protein

SRNA\_AG01\_SoLexa\_Mi2008\_1\_5420\_hit1

5' CACCAAGCAAUAUCGUUUG  
 ||||| |||||  
 GUGGUUCGUGAUAGCAACA 5'

AT4G28610.1 468 486  
 unknown protein

SRNA\_AG01\_SoLexa\_Mi2008\_1\_20963\_hit5

5' UAGAA-UAGAAAGUACAUAUAGA  
 ||||| ||||| ||| |||  
 AUCUUUAUCUUUCAUCUAU-UCU 5'

AT4G29030.1 32 53  
 glycine-rich protein like

SRNA\_AG01\_SoLexa\_Mi2008\_6\_19010\_hit1

5' UACAAAAGAAGGUGA-AAUGCA  
 ||||| |||||: || | ||||  
 AUGUUUUCUCCGCUGUCACGU 5'

AT4G29360.1 1850 1871  
 beta-1,3-glucanase-like protein

SRNA\_AG01\_SoLexa\_Mi2008\_6\_19010\_hit1

5' UACAAAAGAAGGUGA-AAUGCA  
 ||||| |||||: || | ||||  
 AUGUUUUCUCCGCUGUCACGU 5'

AT4G29360.2 1941 1962  
 beta-1,3-glucanase-like protein

SRNA\_AG01\_SoLexa\_Mi2008\_5\_29024\_hit1

5' UCAU-GGUUUAAGAAUGCU  
 :||| |||||: |||  
 GGUAACCAAAGUUCUUGCGA 5'

AT4G29360.2 765 784  
 beta-1,3-glucanase-like protein

SRNA\_AG01\_SoLexa\_Mi2008\_1\_55382\_hit1

5' UUUGCAUAGGGUGUGUUGUGAC  
 ||||| ||||| |||||  
 UAACGUAUCACACACUACACUG 5'

AT4G29700.1 1637 1658  
 nucleotide pyrophosphatase -like protein

SRNA\_AG01\_SoLexa\_Mi2008\_5\_2929\_hit1

5' AUCUAUUGAACAUCGUGUUU  
 ||| || |||||  
 GAGAGAA-UUGUAGCACAAA 5'

AT4G29780.1 869 887  
 unknown protein

SRNA\_AG01\_SoLexa\_Mi2008\_16\_13022\_hit1

5' CUUGGUGGCUUAGUGGGCUAA  
 ||||| |||||: ||| |||||  
 GAACCACCGAGUCA-CCGAUU 5'

AT4G29900.1 2680 2699  
 SRNA\_AG01\_SoLexa\_Mi2008\_3\_5873\_hit1  
 5' CAGAAAAGAGGUAACGAG  
 ||||| :  
 CUCUUUCUCCAUUUGCAU 5'  
 AT4G29900.1 3272 3290

SRNA\_AG01\_SoLexa\_Mi2008\_5\_4358\_hit1  
 5' CAACAGAAGAAUUUCAACAG  
 ||||| |:|||||  
 GUUGUCUUCUUUAGGUUUGUG 5'  
 AT4G30430.1 1009 1029  
 senescence-associated protein homolog

SRNA\_AG01\_SoLexa\_Mi2008\_3\_13542\_hit2  
 5' GAAGUUUUGAAGAUUUGCAGA  
 ||||| ||||| ||||| ||||| |||||  
 CUUCUAAACUUCUAAACCUCU 5'  
 AT4G30430.1 25 45  
 senescence-associated protein homolog

SRNA\_AG01\_SoLexa\_Mi2008\_3\_20883\_hit1  
 5' UAGAAGAAUGGUGAUGUACGUG  
 ||||| ||||| || || ||  
 AUCUUCUUACCCUAC-UG-AC 5'  
 AT4G31500.1 1124 1143  
 cytochrome P450 monooxygenase (CYP83B1)

SRNA\_AG01\_SoLexa\_Mi2008\_1\_32802\_hit1  
 5' UCUACCAGCAGAAACGUCCUA  
 ||||| ||||| ||||| ||||| |||||  
 AGAUGGUCGUCUUUGCAGGAU 5'  
 AT4G31500.1 1554 1574  
 cytochrome P450 monooxygenase (CYP83B1)

SRNA\_AG01\_SoLexa\_Mi2008\_1\_27836\_hit1  
 5' UCA-CGGUGUCUGAUUGAUCG  
 ||| |||||:|||||:|||||:|||||:  
 AGUUGCCACGGACUAACUAGU 5'  
 AT4G31500.1 522 542  
 cytochrome P450 monooxygenase (CYP83B1)

SRNA\_AG01\_SoLexa\_Mi2008\_1\_7340\_hit1  
 5' CAUGUAAAACACUCUCUUU  
 ||||| | ||||| :  
 GUACAUU-U-UGAGAGAAG 5'  
 AT4G31620.1 1039 1055

SRNA\_AG01\_SoLexa\_Mi2008\_1\_37209\_hit1  
 5' UGAUGAGUGUAUGAUUCGCCA  
 ||||| ||||| ||||| ||||| |||||  
 ACUA-UCACCUACUAAGCGGU 5'  
 AT4G31620.1 25 44

SRNA\_AG01\_SoLexa\_Mi2008\_9\_14254\_hit8  
 5' GAUGAUGAUGAUGAUGAUCUU  
 ||||| ||||| ||||| ||||| |||||  
 CUACUACUACUACUACUAGAA 5'  
 AT4G31800.2 474 494

SRNA\_AG01\_SoLexa\_Mi2008\_1\_36323\_hit13  
 5' UGAGGAUGAUGAUGAUGAUGA

flowers\_1sup\_AG01\_SoLexa\_Mi\_Cell\_2008\_hit\_target\_site.txt

||| |||||  
ACUACUACUACUACUACUAGA 5'  
AT4G31800.2 475 495

SRNA\_AG01\_SoLexa\_Mi2008\_1\_3079\_hit472  
5' AUGAUGAUGAUGAUGAUGAUGA  
|||  
GACUACUACUACUACUACUAGA 5'  
AT4G31800.2 475 496

SRNA\_AG01\_SoLexa\_Mi2008\_1\_45039\_hit3  
5' UG-UGAUGAUGAUGAUGAUGAUGA  
|||  
ACGACUACUACUACUACUACUAGA 5'  
AT4G31800.2 476 499

SRNA\_AG01\_SoLexa\_Mi2008\_9\_14254\_hit8  
5' GAUGAUGAUGAUGAUGAUCUU  
|||  
CUACUACUACUACUACUAGAA 5'  
AT4G31800.1 477 497

SRNA\_AG01\_SoLexa\_Mi2008\_1\_38921\_hit1  
5' UGCGGACGAUGAUGAUGAUGAU  
||| |||  
ACGACUACUACUACUACUACUA 5'  
AT4G31800.2 477 498

SRNA\_AG01\_SoLexa\_Mi2008\_7\_3078\_hit1  
5' AUGAUGAUGA-GAAUGAUGAU  
||| ||| |||  
CACUACUACUACU-ACUACUA 5'  
AT4G31800.2 478 497

SRNA\_AG01\_SoLexa\_Mi2008\_1\_36323\_hit13  
5' UGAGGAUGAUGAUGAUGAUGA  
||| |||  
ACUACUACUACUACUACUAGA 5'  
AT4G31800.1 478 498

SRNA\_AG01\_SoLexa\_Mi2008\_1\_3079\_hit472  
5' AUGAUGAUGAUGAUGAUGAUGA  
|||  
GACUACUACUACUACUACUAGA 5'  
AT4G31800.1 478 499

SRNA\_AG01\_SoLexa\_Mi2008\_3\_39351\_hit1  
5' UGCUGAUGAUGCUGAUG-UGAC  
||| ||| |||  
ACGACUACUACUACUACUACUA 5'  
AT4G31800.2 478 499

SRNA\_AG01\_SoLexa\_Mi2008\_1\_56092\_hit3  
5' UUUG-UGAUGAUGAUGAUGAUGA  
: ||| |||  
GAACGACUACUACUACUACU 5'  
AT4G31800.2 479 501

SRNA\_AG01\_SoLexa\_Mi2008\_1\_45039\_hit3  
5' UGU-GAUGAUGAUGAUGAUGAUGA  
||| |||  
ACAACGACUACUACUACUACU 5'  
AT4G31800.2 479 502

flowers\_1sup\_AG01\_SoLexa\_Mi\_Cell\_2008\_hit\_target\_site.txt

SRNA\_AG01\_SoLexa\_Mi2008\_1\_38921\_hit1

5' UGCGGACGAUGAUGAUGAUGAU  
||| || |||||  
ACGACUACUACUACUACUA 5'  
AT4G31800.1 480 501

SRNA\_AG01\_SoLexa\_Mi2008\_6\_14255\_hit369

5' GAUGAUGAUGAUGAUGAUGAUGAU  
||| || |||||  
GUACAACGACUACUACUACUA 5'  
AT4G31800.2 480 503

SRNA\_AG01\_SoLexa\_Mi2008\_7\_3078\_hit1

5' AUGAUGAUGA-GAAUGAUGAU  
||| || |||||  
CACUACUACUACU-ACUACUA 5'  
AT4G31800.1 481 500

SRNA\_AG01\_SoLexa\_Mi2008\_2\_31619\_hit1

5' UCGCUGAUGAUGAUUGAUGAU  
||| || |||||  
UUCGACUACUACUA-CUACUA 5'  
AT4G31800.2 481 500

SRNA\_AG01\_SoLexa\_Mi2008\_1\_3079\_hit472

5' AUGAUGAUGAUGAUGAUGAUGA  
||| || |||||  
UACAACGACUACUACUACU 5'  
AT4G31800.2 481 502

SRNA\_AG01\_SoLexa\_Mi2008\_3\_39351\_hit1

5' UGCUGAUGAUGCUGAUG-UGAC  
||| || |||||  
ACGACUACUACUACUACUA 5'  
AT4G31800.1 481 502

SRNA\_AG01\_SoLexa\_Mi2008\_1\_56092\_hit3

5' UUUG-UGAUGAUGAUGAUGAUGA  
: ||| |||||  
GAACGACUACUACUACUACU 5'  
AT4G31800.1 482 504

SRNA\_AG01\_SoLexa\_Mi2008\_1\_45039\_hit3

5' UGU-GAUGAUGAUGAUGAUGAUGA  
||| | |||||  
ACAACGACUACUACUACUACU 5'  
AT4G31800.1 482 505

SRNA\_AG01\_SoLexa\_Mi2008\_6\_14255\_hit369

5' GAUGAUGAUGAUGAUGAUGAUGAU  
||| || |||||  
GUACAACGACUACUACUACUA 5'  
AT4G31800.1 483 506

SRNA\_AG01\_SoLexa\_Mi2008\_2\_31619\_hit1

5' UCGCUGAUGAUGAUUGAUGAU  
||| || |||||  
UUCGACUACUACU-ACUACUA 5'  
AT4G31800.1 484 503

SRNA\_AG01\_SoLexa\_Mi2008\_1\_3079\_hit472

5' AUGAUGAUGAUGAUGAUGAUGA

flowers\_1sup\_AG01\_SoLexa\_Mi\_Cell\_2008\_hit\_target\_site.txt

```

||||| ||| ||||| ||||| ||||| |||||
UACAACGACUACUACUACUACU 5'
AT4G31800.1      484      505

```

```

SRNA_AG01_SoLexa_Mi2008_1_33805_hit1
5' UC-UGUUGCUGUUGAUGUUGAU
  || ||||| ||||| ||||| |||||
AGUACAACGACUACUACUACUA 5'
AT4G31800.2      484      505

```

```

SRNA_AG01_SoLexa_Mi2008_1_33805_hit1
5' UC-UGUUGCUGUUGAUGUUGAU
  || ||||| ||||| ||||| |||||
AGUACAACGACUACUACUACUA 5'
AT4G31800.1      487      508

```

```

SRNA_AG01_SoLexa_Mi2008_1_33062_hit1
5' UCUCAACGGCUCGGAAUUGGA
  ||||| ||||| ||||| ||||| |||||
AGAGUUGCCGAGCCUUUACCU 5'
AT4G32020.1      30      50
unknown protein

```

```

SRNA_AG01_SoLexa_Mi2008_1_5354_hit1
5' CACAG-CUUUCUUGAACUGC
  | ||| ||||| ||||| ||||| |||||
GGGUCCGAAAGAACUUG-CG 5'
AT4G32250.1     1123     1141
unknown protein

```

```

SRNA_AG01_SoLexa_Mi2008_1_5354_hit1
5' CACAG-CUUUCUUGAACUGC
  | ||| ||||| ||||| ||||| |||||
GGGUCCGAAAGAACUUG-CG 5'
AT4G32250.3     1190     1208
unknown protein

```

```

SRNA_AG01_SoLexa_Mi2008_1_5354_hit1
5' CACAG-CUUUCUUGAACUGC
  | ||| ||||| ||||| ||||| |||||
GGGUCCGAAAGAACUUG-CG 5'
AT4G32250.2     1278     1296
unknown protein

```

```

SRNA_AG01_SoLexa_Mi2008_2_13776_hit2
5' GAC-G-GAAGAAAGUUAGAGU
  ||| | ||||| ||||| ||||| |||||
CUGACUCUUCUUCAAUCUCC 5'
AT4G32250.1     591     611
unknown protein

```

```

SRNA_AG01_SoLexa_Mi2008_2_13776_hit2
5' GAC-G-GAAGAAAGUUAGAGU
  ||| | ||||| ||||| ||||| |||||
CUGACUCUUCUUCAAUCUCC 5'
AT4G32250.3     658     678
unknown protein

```

```

SRNA_AG01_SoLexa_Mi2008_2_13776_hit2
5' GAC-G-GAAGAAAGUUAGAGU
  ||| | ||||| ||||| ||||| |||||
CUGACUCUUCUUCAAUCUCC 5'
AT4G32250.2     746     766

```

flowers\_1sup\_AG01\_SoLexa\_Mi\_Cell\_2008\_hit\_target\_site.txt  
unknown protein

SRNA\_AG01\_SoLexa\_Mi2008\_2\_50423\_hit1  
5' UUGACUACAAAAGAUGGAGCA  
      ||||| ||| |||||  
      CACUGAGGUUGUCUACCUCGU 5'  
AT4G34110.1      2112    2132  
poly(A)-binding protein

SRNA\_AG01\_SoLexa\_Mi2008\_67\_35933\_hit1  
5' UGAGAGUGAUCCGUGUG-UGUU  
      |||||  
      ACUCUCACUAGGGAAACGACAA 5'  
AT4G34540.1      2576    2597  
isoflavone reductase - like protein

SRNA\_AG01\_SoLexa\_Mi2008\_6\_33555\_hit1  
5' UCUGCUCGGUGCUUUAGGGUC  
      |||||  
      AGACGAGCCACGAAAUCCAG 5'  
AT4G34710.2      2279    2299  
arginine decarboxylase (spe2)

SRNA\_AG01\_SoLexa\_Mi2008\_6\_33555\_hit1  
5' UCUGCUCGGUGCUUUAGGGUC  
      |||||  
      AGACGAGCCACGAAAUCCAG 5'  
AT4G34710.1      2414    2434  
arginine decarboxylase (spe2)

SRNA\_AG01\_SoLexa\_Mi2008\_1\_2984\_hit1  
5' AUGACAACAACCAACCACACGU  
      ||| ||||| |||||  
      UAC-GUUGUUGUUUGGUGUGCU 5'  
AT4G34710.2      2534    2554  
arginine decarboxylase (spe2)

SRNA\_AG01\_SoLexa\_Mi2008\_1\_2984\_hit1  
5' AUGACAACAACCAACCACACGU  
      ||| ||||| |||||  
      UAC-GUUGUUGUUUGGUGUGCU 5'  
AT4G34710.1      2669    2689  
arginine decarboxylase (spe2)

SRNA\_AG01\_SoLexa\_Mi2008\_1\_34418\_hit4  
5' UGAA-CCUCAGGCGACCAAG  
      |||| |||| |||||  
      ACUUCGGAGGCCGUGGUUC 5'  
AT4G34970.1      352    371  
actin depolymerizing factor - like protein

SRNA\_AG01\_SoLexa\_Mi2008\_1\_41556\_hit1  
5' UGGCUAACGACAAAGAUGUG  
      :|||| | |||||  
      GCCGACU-CUGUUUCUACAC 5'  
AT4G35190.1      627    645  
putative protein

SRNA\_AG01\_SoLexa\_Mi2008\_4\_36955\_hit4  
5' UGAUAAUU-CAGGUUGUGCAUUC  
      |||| | |||||  
      ACUAAUAAAAGUCCAACACGUAAA 5'  
AT4G35190.1      959    981

flowers\_1sup\_AG01\_SoLexa\_Mi\_Cell\_2008\_hit\_target\_site.txt  
putative protein

SRNA\_AG01\_SoLexa\_Mi2008\_1\_46232\_hit15  
5' UUAACUAUGUUUCAG-G-AUA  
| | | | | | | | | | | | | | | | | | | | | | | |  
AAUUUGAUACAAAUCUCUUAU 5'  
AT4G35770.1 763 784  
senescence-associated protein sen1

SRNA\_AG01\_SoLexa\_Mi2008\_1\_46232\_hit15  
5' UUAACUAUGUUUCAG-G-AUA  
| | | | | | | | | | | | | | | | | | | | | | | |  
AAUUUGAUACAAAUCUCUUAU 5'  
AT4G35770.3 767 788  
senescence-associated protein sen1

SRNA\_AG01\_SoLexa\_Mi2008\_11\_51755\_hit1  
5' UUGCGGUGUUCGAAGUUCGGC  
| | | | | | | | | | | | | | | | | | | | | | | |  
AACACCACAAGCUUCAAGCCA 5'  
AT4G35770.1 813 833  
senescence-associated protein sen1

SRNA\_AG01\_SoLexa\_Mi2008\_1\_51754\_hit1  
5' UUGCGGUGUUCGAAGUUCGG  
| | | | | | | | | | | | | | | | | | | | | | | |  
AACACCACAAGCUUCAAGCC 5'  
AT4G35770.1 814 833  
senescence-associated protein sen1

SRNA\_AG01\_SoLexa\_Mi2008\_11\_51755\_hit1  
5' UUGCGGUGUUCGAAGUUCGGC  
| | | | | | | | | | | | | | | | | | | | | | | |  
AACACCACAAGCUUCAAGCCA 5'  
AT4G35770.3 817 837  
senescence-associated protein sen1

SRNA\_AG01\_SoLexa\_Mi2008\_1\_51754\_hit1  
5' UUGCGGUGUUCGAAGUUCGG  
| | | | | | | | | | | | | | | | | | | | | | | |  
AACACCACAAGCUUCAAGCC 5'  
AT4G35770.3 818 837  
senescence-associated protein sen1

SRNA\_AG01\_SoLexa\_Mi2008\_3\_7026\_hit4  
5' CAUCCC-GUCCUAAUUGGUCC  
| | | | | | | | | | | | | | | | | | | | | | | |  
GUAGGGGCAGGAUUAACCAGG 5'  
AT4G35770.1 842 863  
senescence-associated protein sen1

SRNA\_AG01\_SoLexa\_Mi2008\_1\_46232\_hit15  
5' UUAACUAUGUUUCAG-G-AUA  
| | | | | | | | | | | | | | | | | | | | | | | |  
AAUUUGAUACAAAUCUCUUAU 5'  
AT4G35770.2 843 864  
senescence-associated protein sen1

SRNA\_AG01\_SoLexa\_Mi2008\_3\_7026\_hit4  
5' CAUCCC-GUCCUAAUUGGUCC  
| | | | | | | | | | | | | | | | | | | | | | | |  
GUAGGGGCAGGAUUAACCAGG 5'  
AT4G35770.3 846 867

senescence-associated protein sen1

SRNA\_AG01\_SoLexa\_Mi2008\_11\_51755\_hit1

5' UUGCGGUGUUCGAAGUUCGG  
||| ||||||||||||||||  
AACACCACAAGCUUCAAGCCA 5'  
AT4G35770.2 893 913

senescence-associated protein sen1

SRNA\_AG01\_SoLexa\_Mi2008\_1\_51754\_hit1

5' UUGCGGUGUUCGAAGUUCGG  
||| ||||||||||||||||  
AACACCACAAGCUUCAAGCC 5'  
AT4G35770.2 894 913

senescence-associated protein sen1

SRNA\_AG01\_SoLexa\_Mi2008\_3\_7026\_hit4

5' CAUCCC-GUCCUUAUUGGUCC  
||||| ||||||||||||||||  
GUAGGGGCAGGAAUUAACCAGG 5'  
AT4G35770.2 922 943

senescence-associated protein sen1

SRNA\_AG01\_SoLexa\_Mi2008\_2\_16158\_hit3

5' GUUGAUGUUGAGCCAAAAA  
||||| ||||||||||||||||  
AAACUACAACUCGGUUUAG 5'  
AT4G36850.1 896 914

unknown protein

SRNA\_AG01\_SoLexa\_Mi2008\_13\_10755\_hit1

5' CUCAGUUCGGGCGAGGCAU  
||||| ||||| |||||  
GAGUCAAGGCCGCU-CGUA 5'  
AT4G37430.1 1024 1041

cytochrome P450 monooxygenase (CYP91A2)

SRNA\_AG01\_SoLexa\_Mi2008\_4\_44164\_hit1

5' UGUAGCAACGGUUGUGGUGGU  
||||| ||||||||||||| |||||  
ACAUGGUUGCCAACA-CACCA 5'  
AT4G37430.1 455 474

cytochrome P450 monooxygenase (CYP91A2)

SRNA\_AG01\_SoLexa\_Mi2008\_2\_44633\_hit3

5' UGUCCG-AGGAGUGGUCGAGGG  
||| || ||||| |||||||||  
ACACGCCUCCUCCAGCUCCC 5'  
AT4G37520.1 198 219

peroxidase, prxr2

SRNA\_AG01\_SoLexa\_Mi2008\_1\_36855\_hit2

5' UGAGUGUUGUGGUCAAUGGG  
||||| ||||||||||||| |||||  
UGUCACAACACCAGUGUACCC 5'  
AT4G38540.1 692 712

monooxygenase 2 (M02)

SRNA\_AG01\_SoLexa\_Mi2008\_1\_43581\_hit1

5' UGGUGGUGGUGGU-AAUGGUC  
||||| ||||||||||||| |||||:  
ACCACCACCACCUUACCGA 5'  
AT4G38550.1 1017 1037

Phospholipase like protein

SRNA\_AG01\_SoLexa\_Mi2008\_1\_30443\_hit1  
5' UCGA-AGAUGGUAUUGGAGUCAG  
    |||||:|||||  
    AGCUAUCUAU-AUUACCUCAGUC 5'  
AT4G38550.1    6    27  
Phospholipase like protein

SRNA\_AG01\_SoLexa\_Mi2008\_1\_55562\_hit1  
5' UUUGGAGCAAAAACGU-UUUA  
    |||||:|||||  
    AAACCUCGUUUUUG-AGAAAU 5'  
AT4G39940.1    1154    1173  
adenosine-5'-phosphosulfate-kinase

SRNA\_AG01\_SoLexa\_Mi2008\_1\_31918\_hit1  
5' UCGGCCGGUUGAUGGAUUGU-UG  
    |||||:|||||  
    AGCCG-CAAACUACCUAACAGAC 5'  
AT4G39950.1    1078    1099  
cytochrome P450 like protein

SRNA\_AG01\_SoLexa\_Mi2008\_1\_53083\_hit1  
5' UUGG-UGGUGUCCUCACUGUG  
    |||||:|||||  
    AACCUACCACAAGGAGU-ACAA 5'  
AT5G02500.2    1378    1398  
dnaK-type molecular chaperone hsc70.1

SRNA\_AG01\_SoLexa\_Mi2008\_1\_53083\_hit1  
5' UUGG-UGGUGUCCUCACUGUG  
    |||||:|||||  
    AACCUACCACAAGGAGU-ACAA 5'  
AT5G02500.1    1768    1788  
dnaK-type molecular chaperone hsc70.1

SRNA\_AG01\_SoLexa\_Mi2008\_1\_5228\_hit1  
5' CAA-UUGGGGAAGAUGUUGUU  
    ||:|||||  
    UUUGAACCCCUUCUACAACAG 5'  
AT5G02760.1    391    411  
protein phosphatase - like protein

SRNA\_AG01\_SoLexa\_Mi2008\_9\_14254\_hit8  
5' GAUGAUGAUGAUGAUGAUC-UU  
    |||||:|||||  
    CUACUACUACUACUAGUAA 5'  
AT5G03545.1    292    313  
unknown protein

SRNA\_AG01\_SoLexa\_Mi2008\_6\_14255\_hit369  
5' GAUGAUGAUGAUGAUGAUGAU  
    |||||:|||||  
    CUACUACUACUACUAGUA 5'  
AT5G03545.1    292    315  
unknown protein

SRNA\_AG01\_SoLexa\_Mi2008\_1\_14256\_hit8  
5' GAUGAUGAUGAUGAUGAUGUU  
    |||||:|||||  
    CUACUACUACUACUAGUA 5'  
AT5G03545.1    292    315

unknown protein

SRNA\_AG01\_SoLexa\_Mi2008\_1\_36323\_hit13

5' UGAGGAUGAUGAUGAUGAUGA  
||| ||||||||||||||||| |  
ACUACUACUACUACUACUAGU 5'  
AT5G03545.1 293 313

unknown protein

SRNA\_AG01\_SoLexa\_Mi2008\_1\_3079\_hit472

5' AUGAUGAUGAUGAUGAUGAUGA  
||||||||||||||||||||| |  
UACUACUACUACUACUACUAGU 5'  
AT5G03545.1 293 314

unknown protein

SRNA\_AG01\_SoLexa\_Mi2008\_1\_45039\_hit3

5' UG-UGAUGAUGAUGAUGAUGAUGA  
|| ||||||||||||||||||| |  
ACUACUACUACUACUACUACUAGU 5'  
AT5G03545.1 294 317

unknown protein

SRNA\_AG01\_SoLexa\_Mi2008\_9\_14254\_hit8

5' GAUGAUGAUGAUGAUGAUCUU  
||||||||||||||||||||| |  
CUACUACUACUACUACUACUA 5'  
AT5G03545.1 295 315

unknown protein

SRNA\_AG01\_SoLexa\_Mi2008\_6\_14255\_hit369

5' GAUGAUGAUGAUGAUGAUGAUGAU  
:||||||||||||||||||||| |  
UUACUACUACUACUACUACUACUA 5'  
AT5G03545.1 295 318

unknown protein

SRNA\_AG01\_SoLexa\_Mi2008\_1\_14256\_hit8

5' GAUGAUGAUGAUGAUGAUGAUGUU  
:||||||||||||||||||||| |  
UUACUACUACUACUACUACUACUA 5'  
AT5G03545.1 295 318

unknown protein

SRNA\_AG01\_SoLexa\_Mi2008\_7\_3078\_hit1

5' AUGAUGAUGA-GAAUGAUGAU  
||||||||||| | |||||||||  
UACUACUACUAC-UACUACUA 5'  
AT5G03545.1 296 315

unknown protein

SRNA\_AG01\_SoLexa\_Mi2008\_1\_36323\_hit13

5' UGAGGAUGAUGAUGAUGAUGA  
||| ||||||||||||||||||| |  
ACUACUACUACUACUACUACU 5'  
AT5G03545.1 296 316

unknown protein

SRNA\_AG01\_SoLexa\_Mi2008\_1\_3079\_hit472

5' AUGAUGAUGAUGAUGAUGAUGA  
||||||||||||||||||||| |  
UACUACUACUACUACUACUACU 5'  
AT5G03545.1 296 317

unknown protein

SRNA\_AG01\_SoLexa\_Mi2008\_1\_45039\_hit3

5' UGUGAUGAUGAUGAUGAUGAUGA  
:|||||  
UUACUACUACUACUACUACU 5'  
AT5G03545.1 296 318

unknown protein

SRNA\_AG01\_SoLexa\_Mi2008\_1\_56092\_hit3

5' UUUG-UGAUGAUGAUGAUGAUGA  
|||||  
AAACUACUACUACUACUACU 5'  
AT5G03545.1 297 319

unknown protein

SRNA\_AG01\_SoLexa\_Mi2008\_6\_14255\_hit369

5' GAUGAUGAUGAUGAUGAUGAUGAU  
|||:|||||  
CUAUUACUACUACUACUACUA 5'  
AT5G03545.1 298 321

unknown protein

SRNA\_AG01\_SoLexa\_Mi2008\_1\_14256\_hit8

5' GAUGAUGAUGAUGAUGAUGAUGUU  
|||:|||||  
CUAUUACUACUACUACUACUA 5'  
AT5G03545.1 298 321

unknown protein

SRNA\_AG01\_SoLexa\_Mi2008\_7\_3078\_hit1

5' AUGAUGAUGA-GAAUGAUGAU  
|||||  
UACUACUACUACU-ACUACUA 5'  
AT5G03545.1 299 318

unknown protein

SRNA\_AG01\_SoLexa\_Mi2008\_1\_3079\_hit472

5' AUGAUGAUGAUGAUGAUGAUGA  
|||:|||||  
ACCUAUUACUACUACUACU 5'  
AT5G03545.1 302 323

unknown protein

SRNA\_AG01\_SoLexa\_Mi2008\_4\_14169\_hit1

5' GAUAAUGAUGAUGAAAGAUGA  
|||||  
CUAUUACUACUACUA-CUACU 5'  
AT5G03545.1 303 322

unknown protein

SRNA\_AG01\_SoLexa\_Mi2008\_1\_39699\_hit1

5' UGGA-ACUGAUGAUGAUGAUGA  
|||||  
ACCUAUUACUACUACUACU 5'  
AT5G03545.1 303 324

unknown protein

SRNA\_AG01\_SoLexa\_Mi2008\_1\_45039\_hit3

5' UGUGAUGAUGAUGAUGAUGAUGA  
|| |||:|||||  
AC-CUAUUACUACUACUACU 5'  
AT5G03545.1 303 324

unknown protein

SRNA\_AG01\_SoLexa\_Mi2008\_1\_52789\_hit1

5' UUGGGUGAUGAUGAUGAUUGAU  
 ||||:||||||| |||  
 AACCUAUUACUACUACUA-CUA 5'  
 AT5G03545.1 305 325

unknown protein

SRNA\_AG01\_SoLexa\_Mi2008\_1\_2280\_hit1

5' AGUGGAUGAUGAUGAUGAUG  
 | ||||:|||||||  
 UAACCUAUUACUACUACUAC 5'  
 AT5G03545.1 306 325

unknown protein

SRNA\_AG01\_SoLexa\_Mi2008\_1\_56092\_hit3

5' UUUGUGAUGAUGAUGAUGAUGA  
 |||| |||:|||||||  
 AAAC-CUAUUACUACUACUACU 5'  
 AT5G03545.1 306 326

unknown protein

SRNA\_AG01\_SoLexa\_Mi2008\_1\_7106\_hit1

5' CAUGAAGGGCAAGGCGCGU-AU  
 |||||:|||| ||  
 CUACUCCCGUCCGUGCACUA 5'  
 AT5G04200.1 646 667

latex-abundant protein - like

SRNA\_AG01\_SoLexa\_Mi2008\_1\_7082\_hit4

5' CAUCUCCAGGA-ACCUCUUGAU  
 | ||||| || |||||  
 GGAGAGGUCCUAUG-AGAACUA 5'  
 AT5G05320.1 800 820

monooxygenase

SRNA\_AG01\_SoLexa\_Mi2008\_1\_646\_hit1

5' AACAGAAAAAAAAACA-UGAU  
 ||||:||||||| |||  
 UUGUUUUUUUUUUGUAACUU 5'  
 AT5G05340.1 1138 1157

peroxidase

SRNA\_AG01\_SoLexa\_Mi2008\_1\_21951\_hit1

5' UAGAUUUACAGUUGAUUGUUU  
 ||||:||| |||||  
 AUCUGAAUCUCAACUAACAAC 5'  
 AT5G05340.1 5 25

peroxidase

SRNA\_AG01\_SoLexa\_Mi2008\_13\_14779\_hit6

5' GCUGAGAAUCGAAAU-AGUU  
 || ||||| |||||  
 AGA-UCUUAGCUUUUUAUCA 5'  
 AT5G05340.1 70 88

peroxidase

SRNA\_AG01\_SoLexa\_Mi2008\_2\_45191\_hit1

5' UGUGCGU-UGGUUUCAGGAUGGA  
 |||| || ||||| |||||  
 ACACCCACACCAAAGCCCUACCU 5'  
 AT5G06370.1 372 394

unknown protein

SRNA\_AG01\_SoLexa\_Mi2008\_7\_41670\_hit11

5' UGGCUUGCCAAUGGAGGAUCC  
    ||||| ||||||||||||||||  
    ACCGA-CGGUUACCUCCUAGU 5'  
AT5G06370.1    918    937  
unknown protein

SRNA\_AG01\_SoLexa\_Mi2008\_1\_29050\_hit1

5' UCAUG-UGGGUUGGAUUGAUA  
    ||||| |||||||||||||||| ||  
    CGUACCACCCAACCUAAC-AU 5'  
AT5G06860.1    350    369  
polygalacturonase inhibiting protein 1; PGIP1 (gb|AAF69827.1)

SRNA\_AG01\_SoLexa\_Mi2008\_6\_20075\_hit1

5' UACGAGCCACUGGAAACUGAA  
    || ||| | |||||||||||||  
    AU-CUCUG-GACCUUUGACUU 5'  
AT5G07580.1    1013    1031  
transcription factor-like protein (emb|CAB87947.1)

SRNA\_AG01\_SoLexa\_Mi2008\_1\_39180\_hit4

5' UGCUAGUGAUGAUGGUACAAU  
    ||| ||||||||||||| |||||  
    ACGUUCACUACUACCUUGUUU 5'  
AT5G07580.1    178    198  
transcription factor-like protein (emb|CAB87947.1)

SRNA\_AG01\_SoLexa\_Mi2008\_1\_28254\_hit1

5' UCAGCAAGUGAUGAUGGAAC  
    || |||||||||||||||||  
    AGACGUUCACUACUACCUUG 5'  
AT5G07580.1    181    200  
transcription factor-like protein (emb|CAB87947.1)

SRNA\_AG01\_SoLexa\_Mi2008\_9\_14254\_hit8

5' GAUGAUGAUGAUGAUGAUCUU  
    ||||||||||||||||||| ::  
    CUACUACUACUACUACUAAGG 5'  
AT5G07580.1    437    457  
transcription factor-like protein (emb|CAB87947.1)

SRNA\_AG01\_SoLexa\_Mi2008\_1\_36323\_hit13

5' UGAGGAUGAUGAUGAUGAUGA  
    ||| |||||||||||||||||  
    ACUACUACUACUACUACUAAG 5'  
AT5G07580.1    438    458  
transcription factor-like protein (emb|CAB87947.1)

SRNA\_AG01\_SoLexa\_Mi2008\_1\_3079\_hit472

5' AUGAUGAUGAUGAUGAUGAUGA  
    |||||||||||||||||||  
    CACUACUACUACUACUAAG 5'  
AT5G07580.1    438    459  
transcription factor-like protein (emb|CAB87947.1)

SRNA\_AG01\_SoLexa\_Mi2008\_1\_45039\_hit3

5' UGUGAUGAUGAUGAUGAUGAUGA  
    |||||||||||||||||||  
    CCACUACUACUACUACUAAG 5'  
AT5G07580.1    438    460

flowers\_1sup\_AG01\_SoLexa\_Mi\_Cell\_2008\_hit\_target\_site.txt  
transcription factor-like protein (emb|CAB87947.1)

SRNA\_AG01\_SoLexa\_Mi2008\_7\_3078\_hit1  
5' AUGAUGAUGA-GAAUGAUGAU  
    |||||   ||   |||||  
    GACUACUACUACU-ACUACUA 5'  
AT5G07580.1     441     460  
transcription factor-like protein (emb|CAB87947.1)

SRNA\_AG01\_SoLexa\_Mi2008\_1\_38921\_hit1  
5' UGCG-GACGAUGAUGAUGAUGAU  
    || | ||   |||||  
    AC-CACUACUACUACUACUA 5'  
AT5G07580.1     441     462  
transcription factor-like protein (emb|CAB87947.1)

SRNA\_AG01\_SoLexa\_Mi2008\_1\_41920\_hit17  
5' UGG-GAUGAUGAAGUUGAUGAU  
    |||   |||||   |   |||||  
    ACCACUACUACUACUACUA 5'  
AT5G07580.1     441     462  
transcription factor-like protein (emb|CAB87947.1)

SRNA\_AG01\_SoLexa\_Mi2008\_1\_56092\_hit3  
5' UUUGUGAUGAUGAUGAUGAUGA  
    :|   |||||  
    GACCACUACUACUACUACU 5'  
AT5G07580.1     441     462  
transcription factor-like protein (emb|CAB87947.1)

SRNA\_AG01\_SoLexa\_Mi2008\_1\_36323\_hit13  
5' UGAG-GAUGAUGAUGAUGAUGA  
    || |   |||||  
    AC-CACUACUACUACUACU 5'  
AT5G07580.1     442     462  
transcription factor-like protein (emb|CAB87947.1)

SRNA\_AG01\_SoLexa\_Mi2008\_1\_45039\_hit3  
5' UGUGAUGAUGAUGAUGAUGAUGA  
    || |   |||||  
    AC-C-ACUACUACUACUACU 5'  
AT5G07580.1     442     462  
transcription factor-like protein (emb|CAB87947.1)

SRNA\_AG01\_SoLexa\_Mi2008\_1\_2280\_hit1  
5' AGUGGAUGAUGAUGAUGAUG  
    |||   |||||  
    GCAC-UACUACUACUACUAC 5'  
AT5G07580.1     443     461  
transcription factor-like protein (emb|CAB87947.1)

SRNA\_AG01\_SoLexa\_Mi2008\_4\_42709\_hit1  
5' UGGGUGAUGAUGAUGAUUGAU  
    :|||||   |||  
    CUCCACUACUACUACUA-CUA 5'  
AT5G07580.1     444     463  
transcription factor-like protein (emb|CAB87947.1)

SRNA\_AG01\_SoLexa\_Mi2008\_4\_11252\_hit1  
5' CUC-UGAGUGUGUGAUGAUGAUG  
    |||   |||||   |||  
    GAGUACUCAGACACUAGUU-AA 5'  
AT5G07580.1     6       26

flowers\_1sup\_AG01\_SoLexa\_Mi\_Cell\_2008\_hit\_target\_site.txt  
transcription factor-like protein (emb|CAB87947.1)

SRNA\_AG01\_SoLexa\_Mi2008\_1\_34613\_hit1  
5' UGAAGAUGAAGAUGAGUUGU  
|||||||:|||||  
CCUUCUACUUCUACUUAACG 5'  
AT5G07580.1 811 830  
transcription factor-like protein (emb|CAB87947.1)

SRNA\_AG01\_SoLexa\_Mi2008\_339\_11394\_hit3  
5' CUGAAGUGUUUGGGGAACUC  
|||||||:|||||  
AACUUCACAAACCCUCUUGAA 5'  
AT5G10180.1 124 144  
sulfate transporter

SRNA\_AG01\_SoLexa\_Mi2008\_1\_22796\_hit1  
5' UAGGAUUAUUGAUUAGUGU  
|||||||:|||||  
AUCCUAUAACUA-AUCAUA 5'  
AT5G10180.1 1712 1729  
sulfate transporter

SRNA\_AG01\_SoLexa\_Mi2008\_1\_4581\_hit2  
5' CAAGA-AUACUACAGCCAU-GGUC  
|||||:|||||  
GUUCUCUAUGAUGUCGGUGGCCAG 5'  
AT5G10180.1 590 613  
sulfate transporter

SRNA\_AG01\_SoLexa\_Mi2008\_6\_50680\_hit1  
5' UUGAGGCAAAGAACAUCCGAA  
|||||:|||||||  
CACUCC-UUUCUUGUAGGCUC 5'  
AT5G10180.1 931 950  
sulfate transporter

SRNA\_AG01\_SoLexa\_Mi2008\_1\_20849\_hit1  
5' UAGAACCU-CGGUCGAGAAUG-GU  
||| |||||:|||||||  
AUCGUGGAAGCCAGCUCUACUCA 5'  
AT5G10760.1 1046 1069  
nucleoid DNA-binding protein cnd41 - like protein

SRNA\_AG01\_SoLexa\_Mi2008\_1\_4400\_hit1  
5' CAACAUUUAGCGUCGUCUGC  
||||||:|||||||  
GUUGUAGAUCGAGCAGACG 5'  
AT5G10760.1 1367 1386  
nucleoid DNA-binding protein cnd41 - like protein

SRNA\_AG01\_SoLexa\_Mi2008\_1\_44071\_hit1  
5' UGUACGGAAGUUUUGGUGGCGA  
|| |||||:|||||||  
AC-UGCCUUCACUACCACCGCU 5'  
AT5G11420.1 149 169  
unknown protein

SRNA\_AG01\_SoLexa\_Mi2008\_1\_3917\_hit1  
5' CAAAAGAAGCAA-AAGUUUGUU  
|||||||:|||||||  
GUUUUCUUC-UUCUUAAAACAA 5'  
AT5G13080.1 50 70

WRKY-like protein

SRNA\_AG01\_SoLexa\_Mi2008\_1\_17162\_hit1

5' UAACA-AGAGGAAGAAGAACGAU  
||||| ||||||||||||||| ||  
AUUGUCUCUCCUUCUUCUU-CUU 5'  
AT5G13180.1 24 45

NAM-like protein

SRNA\_AG01\_SoLexa\_Mi2008\_1\_14\_hit1

5' AAAAAACAGAGAACAAGAAGA  
||||||| |||||||  
CUUUUUUGUCUCUCCUUCUUCU 5'  
AT5G13180.1 27 48

NAM-like protein

SRNA\_AG01\_SoLexa\_Mi2008\_1\_341\_hit1

5' AAAGAAACAGAGAGGAAGAU  
||| |||||||||||||||  
UUU-UUUGUCUCUCCUUCU 5'  
AT5G13180.1 30 48

NAM-like protein

SRNA\_AG01\_SoLexa\_Mi2008\_3\_10681\_hit1

5' CUCACGAUUUGAUUUCUCU  
|: |||||||||||||||  
GGUUGC UAAACUAAAGGAGA 5'  
AT5G13180.1 383 402

NAM-like protein

SRNA\_AG01\_SoLexa\_Mi2008\_12\_14067\_hit2

5' GAGG-A-UCCAUUGGAGGGCA  
|||| | |||||||:|||||  
CUCCGUUAGGUAACUCCCGU 5'  
AT5G13190.1 462 482

unknown protein

SRNA\_AG01\_SoLexa\_Mi2008\_1\_22432\_hit10

5' UAGCUAAAAAACCACCAUCGAG  
:||||||||||||| |||  
GUCGAUUUUUUGGUGGUU-CUC 5'  
AT5G13740.1 817 837

transporter-like protein

SRNA\_AG01\_SoLexa\_Mi2008\_1\_40339\_hit1

5' UGGAGAUGGAAGAUGAG-CC  
||||||| ||||| ||  
ACCUCUACCUUCCACUCUGG 5'  
AT5G13930.1 876 895

chalcone synthase (naringenin-chalcone synthase) (testa 4 protein) (sp|P13114)

SRNA\_AG01\_SoLexa\_Mi2008\_2\_2279\_hit1

5' AGUG-GAAAUCAGUAAUUUA  
|||| | |||||||  
UCACACUUUAGUCAUUAACC 5'  
AT5G14780.1 29 48

formate dehydrogenase (FDH)

SRNA\_AG01\_SoLexa\_Mi2008\_2\_22965\_hit1

5' UAGG-CGUAAAGAUCCGGGAUG  
|||| ||| |||||||:|  
AUCCUGCACUUCUAGGCCCUAU 5'  
AT5G14780.1 376 397

flowers\_1sup\_AG01\_SoLexa\_Mi\_Cell\_2008\_hit\_target\_site.txt  
 formate dehydrogenase (FDH)

SRNA\_AG01\_SoLexa\_Mi2008\_1\_35784\_hit2  
 5' UGAGAAGAGAUAGAAUAGA  
 ||| |  
 ACUCUUCUCUAU-UUAUAG 5'  
 AT5G14780.1 80 97  
 formate dehydrogenase (FDH)

SRNA\_AG01\_SoLexa\_Mi2008\_10\_49988\_hit1  
 5' UUGAACAAUUGAUGUUG-UGCU  
 |:| |  
 AGCUUGUUACUACAACCACGA 5'  
 AT5G17380.1 1544 1565  
 2-hydroxyphytanoyl-CoA lyase-like protein

SRNA\_AG01\_SoLexa\_Mi2008\_3\_4962\_hit3  
 5' CAAGUAAUAACAUUUAACCU  
 ||| |  
 GUU-AUUAUUGUAAA-U-GGU 5'  
 AT5G17380.1 1681 1698  
 2-hydroxyphytanoyl-CoA lyase-like protein

SRNA\_AG01\_SoLexa\_Mi2008\_2\_56\_hit1  
 5' AAAAAAGAGGAAGAUUGGU  
 ||| |  
 CAUUUCUCCUUCUAACCA 5'  
 AT5G18170.1 13 31  
 glutamate dehydrogenase (EC 1.4.1.-) 1 (pir||s71217)

SRNA\_AG01\_SoLexa\_Mi2008\_1\_22493\_hit1  
 5' UAGCUCCUGAU-GGUCGAGUA  
 ||| |  
 AUCGAGGACUACCCAGAUCAG 5'  
 AT5G18470.1 778 798  
 unknown protein

SRNA\_AG01\_SoLexa\_Mi2008\_1\_54615\_hit4  
 5' UUUUUUG-GGUACACAAUUA  
 |||:| |  
 AAAUGACACCAUGUGUUUUAU 5'  
 AT5G23010.1 1621 1641  
 2-isopropylmalate synthase-like; homocitrate synthase-like

SRNA\_AG01\_SoLexa\_Mi2008\_2\_255\_hit1  
 5' AAA-AUAGUGUGGGAA-UGUUA  
 ||| |  
 UUUUAUCACACCCUUAACAAA 5'  
 AT5G23010.1 5 26  
 2-isopropylmalate synthase-like; homocitrate synthase-like

SRNA\_AG01\_SoLexa\_Mi2008\_9\_13465\_hit1  
 5' GAAGAUGG-GUGGGAAUUGUUU  
 |||:| |  
 AUUCUAUCACACCCUUAACAAA 5'  
 AT5G23010.1 5 26  
 2-isopropylmalate synthase-like; homocitrate synthase-like

SRNA\_AG01\_SoLexa\_Mi2008\_1\_45985\_hit1  
 5' UGUUGAUGUUGUUGUCGUUAG  
 ||| |  
 ACAACAACAACAACAUAU 5'  
 AT5G23280.1 53 73

unknown protein

SRNA\_AG01\_SoLexa\_Mi2008\_1\_51621\_hit1

```
5' UUGCCUUGAUGUUGAUGUUGU
   |||| | |||| |||||
   AACG-A-CUACUACUACAACA 5'
AT5G23280.1    625    643
unknown protein
```

SRNA\_AG01\_SoLexa\_Mi2008\_1\_53198\_hit1

```
5' UUGGUUGC-GAUGAUGAUGUUG
   ||||| |||||
   AACCAACGACUACUACAAC 5'
AT5G23280.1    626    647
unknown protein
```

SRNA\_AG01\_SoLexa\_Mi2008\_1\_38236\_hit3

```
5' UGCAUCU-GUUGUUGGUGUUGC
   |||| || ||||| |||||
   ACGUCGAACAACAACGACAACG 5'
AT5G23280.1    661    682
unknown protein
```

SRNA\_AG01\_SoLexa\_Mi2008\_1\_37145\_hit2

```
5' UGAUCUUUGGUUCGCGGGUC
   ||||| |||||
   CCUAGAAACCAAG-GCCCA 5'
AT5G23660.1    105    123
MtN3-like protein
```

SRNA\_AG01\_SoLexa\_Mi2008\_6\_37144\_hit2

```
5' UGAUCUUUGGUUCGCGGGU
   ||||| |||||
   CCUAGAAACCAAG-GCCCA 5'
AT5G23660.1    106    123
MtN3-like protein
```

SRNA\_AG01\_SoLexa\_Mi2008\_3\_43372\_hit2

```
5' UGGU-GAUCUUUGGUUCGCGGG
   |:| ||||| |||||
   AUCAGCUAGAAACCAAG-GCCC 5'
AT5G23660.1    107    127
MtN3-like protein
```

SRNA\_AG01\_SoLexa\_Mi2008\_1\_27384\_hit1

```
5' UCAA-UAGGAAAAUAAUUACA
   |||| | ||||| |||||
   AGUUGAACCUUUUAAUAAU 5'
AT5G23660.1    1226   1246
MtN3-like protein
```

SRNA\_AG01\_SoLexa\_Mi2008\_1\_629\_hit1

```
5' AACAAAGAUGGUGAUGGGU
   ||||| |||||
   UUGUUUCUACCUCUA--CAUA 5'
AT5G23660.1    387    405
MtN3-like protein
```

SRNA\_AG01\_SoLexa\_Mi2008\_1\_33058\_hit1

```
5' UCUCAACCAAUCCGACGGCGU
   ||||| |||||
   AGAGUUGGUUUAGGCUGCCGCA 5'
AT5G23660.1    783    804
```

MtN3-like protein

SRNA\_AG01\_SoLexa\_Mi2008\_3\_5851\_hit1

5' CACUUCUGGCAAUUUCGAGC  
|||||  
GUGAAGACCGUAAAAGCGUCG 5'  
AT5G23660.1 816 836  
MtN3-like protein

SRNA\_AG01\_SoLexa\_Mi2008\_1\_14213\_hit1

5' GAUCGGACGACGGUGAUCGCUA  
|||||  
CUAGCCUGCUGCCACUAGCGAU 5'  
AT5G23660.1 883 904  
MtN3-like protein

SRNA\_AG01\_SoLexa\_Mi2008\_28\_46962\_hit1

5' UUACAUGUGUUCACCGAUCGGA  
|||||  
AAUGUACACAAGUGGCUAGCCU 5'  
AT5G23660.1 898 919  
MtN3-like protein

SRNA\_AG01\_SoLexa\_Mi2008\_31\_31178\_hit1

5' UCGAUCGUUACAGUUACAUGUGUU  
|||||  
AGCUAGCAAUGUCAAUUGUACACAA 5'  
AT5G23660.1 909 932  
MtN3-like protein

SRNA\_AG01\_SoLexa\_Mi2008\_1\_28297\_hit1

5' UCAGCAUUUCGAUCGUUACAGU  
|||||  
AGUCGUAAAGCUAGCAAUGUCA 5'  
AT5G23660.1 919 940  
MtN3-like protein

SRNA\_AG01\_SoLexa\_Mi2008\_1\_34056\_hit1

5' UGAAAAACGGGAGUGAGUUUAAG  
|||||  
ACUUUUUGCCUACUCACUAAAUC 5'  
AT5G25110.1 145 168  
serine/threonine protein kinase-like protein

SRNA\_AG01\_SoLexa\_Mi2008\_1\_23143\_hit1

5' UAGGGGCCGAUUGAUAGCGACUGU  
|||||:|||||  
AUCCCCGGCUAACCAUUGCUGACA 5'  
AT5G25110.1 174 197  
serine/threonine protein kinase-like protein

SRNA\_AG01\_SoLexa\_Mi2008\_1\_23146\_hit1

5' UAGGGGCUGAUUGGUAGCGAGUGU  
|||||:|||||:|||  
AUCCCCGGCUAACCAUUGCUGACA 5'  
AT5G25110.1 174 197  
serine/threonine protein kinase-like protein

SRNA\_AG01\_SoLexa\_Mi2008\_17\_8110\_hit2

5' CCGUGGGUU-GUUUUUAUAGAA  
|||||  
AGCACCAAUAUUAUUUCUU 5'  
AT5G25110.1 17 38

serine/threonine protein kinase-like protein

SRNA\_AG01\_SoLexa\_Mi2008\_1\_4569\_hit2

5' CAAGAAGAAGGUUGG-UUAGUU  
|||||  
GUUCUUCUCC-ACCAAUCA 5'

AT5G25110.1 26 46  
serine/threonine protein kinase-like protein

SRNA\_AG01\_SoLexa\_Mi2008\_1\_36886\_hit1

5' UGAG-UUGAUGAUUAGGAAG-GA  
|||||:|||||  
ACUCUAACUACUGAUCCUUCUCU 5'

AT5G25340.1 145 167  
unknown protein

SRNA\_AG01\_SoLexa\_Mi2008\_2\_8432\_hit1

5' CGACCGUUAGAAGAAGCGCGG  
|||||  
GCUGGCAAUCUUCUUCGCGCC 5'

AT5G26340.1 706 726  
hexose transporter - like protein

SRNA\_AG01\_SoLexa\_Mi2008\_22\_7409\_hit1

5' CA-UGUUGACCAAUUCAAGA  
|||  
GUGACAACUGGUUAAAUUCU 5'

AT5G26770.2 110 129  
unknown protein

SRNA\_AG01\_SoLexa\_Mi2008\_2\_131\_hit1

5' AAAA-AUAUAGUUCAGGGUU  
|||  
GUUUGUAUCUCAAGUCCCAA 5'

AT5G26770.3 128 147  
unknown protein

SRNA\_AG01\_SoLexa\_Mi2008\_2\_131\_hit1

5' AAAA-AUAUAGUUCAGGGUU  
|||  
GUUUGUAUCUCAAGUCCCAA 5'

AT5G26770.2 29 48  
unknown protein

SRNA\_AG01\_SoLexa\_Mi2008\_2\_6120\_hit1

5' CAGAUACAAAACGUAAAGAU  
|||  
AUCU-UGUUUAGCAUUUCUA 5'

AT5G26770.2 70 88  
unknown protein

SRNA\_AG01\_SoLexa\_Mi2008\_1\_21732\_hit1

5' UAGAUCACAAUGG-UGUAUGC  
|||||  
CUCUAGUGUUACCUA-AUACG 5'

AT5G35980.2 1298 1317  
protein kinase-like

SRNA\_AG01\_SoLexa\_Mi2008\_2\_34753\_hit1

5' UGAAGGAUCGAGGUCGAGGCAC  
|||  
ACU-CCUA-CUCCAGCUCCGUA 5'

AT5G35980.1 3026 3045

protein kinase-like

SRNA\_AG01\_SoLexa\_Mi2008\_157\_34752\_hit1

5' UGAAGGAUCGAGGUCGAGGCA  
 ||| |||| | ||||| |||||  
 ACU-CCUA-CUCCAGCUCCGU 5'  
 AT5G35980.1 3027 3045  
 protein kinase-like

SRNA\_AG01\_SoLexa\_Mi2008\_3\_51268\_hit1

5' UUGAUUGGGAGCCUAUCUCGC  
 ||||| ||||| |||||  
 AACUAACCCUCGUUAGAGGA 5'  
 AT5G35980.1 3060 3080  
 protein kinase-like

SRNA\_AG01\_SoLexa\_Mi2008\_1\_34620\_hit1

5' UGAAGAUGAUGAUGAAGUU  
 ||||| ||||| |||||  
 ACUUCUACUACUACU-CAA 5'  
 AT5G35980.2 54 71  
 protein kinase-like

SRNA\_AG01\_SoLexa\_Mi2008\_1\_50630\_hit7

5' UUGAGGAAGAAGAUGAGGAUGAU  
 : ||||| ||||| |||||  
 GACUCCUUCUUCUACUACUACUC 5'  
 AT5G35980.2 55 77  
 protein kinase-like

SRNA\_AG01\_SoLexa\_Mi2008\_1\_36323\_hit13

5' UGAGGAUGAUGAUGAUGAUGA  
 ||||| || ||||| |||||  
 ACUCCUUCUUCUACUACUACU 5'  
 AT5G35980.2 56 76  
 protein kinase-like

SRNA\_AG01\_SoLexa\_Mi2008\_2\_40489\_hit1

5' UGGAGGACAAGCUAGUGAUCGU  
 ||||| ||||| |: |||||  
 ACCUCCUGUUCGUUACUAGCU 5'  
 AT5G36220.1 847 868  
 cytochrome P450 monooxygenase (CYP81D1 )

SRNA\_AG01\_SoLexa\_Mi2008\_2\_35253\_hit1

5' UGACAGACUGAUGUGUUAGA  
 |||| | ||||| |||||  
 ACUGAC-GACUACACAAUCA 5'  
 AT5G36220.1 940 958  
 cytochrome P450 monooxygenase (CYP81D1 )

SRNA\_AG01\_SoLexa\_Mi2008\_1\_51898\_hit5

5' UUGC UUUCUUGAUGGAUACUCA  
 ||||| ||||| |||||  
 AACGAAAGAACUAC-UA-GAGC 5'  
 AT5G37600.1 974 993  
 glutamate--ammonia ligase

SRNA\_AG01\_SoLexa\_Mi2008\_13\_4545\_hit1

5' CAAGAAAGAUGGUUGUCGUU  
 ||||| ||||| |||||  
 ACUCUUUCAACCAACAGCAA 5'  
 AT5G39050.1 534 553

Anthocyanin acyltransferase - like protein

SRNA\_AG01\_SoLexa\_Mi2008\_1\_13420\_hit2

5' GAAGAAGAAGAAGACUCUU  
|| |||||  
CUCCUUCUUCUUCUGAGAA 5'  
AT5G39050.1 830 848

Anthocyanin acyltransferase - like protein

SRNA\_AG01\_SoLexa\_Mi2008\_1\_4090\_hit1

5' CA-AAGAGUAGACAAUCAUCA  
|| |||||:||||| |||  
GUAUUCUCAUUUGUUAGU-GUU 5'

AT5G39050.1 888 908

Anthocyanin acyltransferase - like protein

SRNA\_AG01\_SoLexa\_Mi2008\_10440\_13909\_hit2

5' GAGAAGCAGGGCAGUGCA  
||||||| |||||  
CUCUUCGUCCAGUGCACUC 5'

AT5G39610.1 769 787

NAM / CUC2 - like protein

SRNA\_AG01\_SoLexa\_Mi2008\_110\_13911\_hit1

5' GAGAAGCAGGGCAGUGCG  
||||||| ||||| |  
CUCUUCGUCCAGUGCACUC 5'

AT5G39610.1 769 787

NAM / CUC2 - like protein

SRNA\_AG01\_SoLexa\_Mi2008\_41322\_14841\_hit2

5' GGAGAAGCAGGGCAGUGCA  
||||||| |||||  
CCUCUUCGUCCAGUGCACUC 5'

AT5G39610.1 769 788

NAM / CUC2 - like protein

SRNA\_AG01\_SoLexa\_Mi2008\_422\_14845\_hit1

5' GGAGAAGCAGGGCAGUGCG  
||||||| ||||| |  
CCUCUUCGUCCAGUGCACUC 5'

AT5G39610.1 769 788

NAM / CUC2 - like protein

SRNA\_AG01\_SoLexa\_Mi2008\_3\_40192\_hit1

5' UGGAGAAGCAGGGCAGU-AGA  
||||||| ||||| |||  
CCCUCUUCGUCCAGUGCACUCU 5'

AT5G39610.1 769 790

NAM / CUC2 - like protein

SRNA\_AG01\_SoLexa\_Mi2008\_23\_14840\_hit3

5' GGAGAAGCAGGGCAGUGC  
||||||| |||||  
CCUCUUCGUCCAGUGCACU 5'

AT5G39610.1 770 788

NAM / CUC2 - like protein

SRNA\_AG01\_SoLexa\_Mi2008\_404\_40194\_hit3

5' UGGAGAAGCAGGGCAGUGC  
:||||||| |||||  
GCCUCUUCGUCCAGUGCACU 5'

AT5G39610.1 770 789

NAM / CUC2 - like protein

SRNA\_AG01\_SoLexa\_Mi2008\_9\_40189\_hit2

5' UGGAGAAGCAGGGCACGUA  
:|||||  
GCCUCUUCGUCCAGUGCAC 5'  
AT5G39610.1 771 789  
NAM / CUC2 - like protein

SRNA\_AG01\_SoLexa\_Mi2008\_366\_40193\_hit3

5' UGGAGAAGCAGGGCACGUG  
:|||||  
GCCUCUUCGUCCAGUGCAC 5'  
AT5G39610.1 771 789  
NAM / CUC2 - like protein

SRNA\_AG01\_SoLexa\_Mi2008\_2\_3231\_hit2

5' AUGGAGAAGCAGGGCACGUG  
:|||||  
AGCCUCUUCGUCCAGUGCAC 5'  
AT5G39610.1 771 790  
NAM / CUC2 - like protein

SRNA\_AG01\_SoLexa\_Mi2008\_1\_40200\_hit1

5' UGGAGAAGCAGGGU-ACGUG  
|||||  
CCCUCUUCGU-CCAGUGCAC 5'  
AT5G39610.1 772 790  
NAM / CUC2 - like protein

SRNA\_AG01\_SoLexa\_Mi2008\_1\_2655\_hit2

5' AUAGUGCUGAAACAUGA-GAU  
|||||  
UAUCACAACUUUGUACUUCUC 5'  
AT5G40670.1 957 977  
unknown protein

SRNA\_AG01\_SoLexa\_Mi2008\_1\_3\_hit25

5' AAAAAAAAAAAAAAGAAAGA  
|||||  
UUUUUUUUUUUUUUAUCU 5'  
AT5G41400.1 644 662  
RING zinc finger protein-like

SRNA\_AG01\_SoLexa\_Mi2008\_1\_3\_hit25

5' AAAAAAAAAAAAAAGAAAGA  
|||||  
UUUUUUUUUUUUU-UUUCU 5'  
AT5G41400.1 649 666  
RING zinc finger protein-like

SRNA\_AG01\_SoLexa\_Mi2008\_1\_1776\_hit10

5' AGAA-AAAAAAAAAAAAAAAAAU  
| | | | |  
UAUUGUUUUUUUUUUUUUUUC 5'  
AT5G41400.1 650 671  
RING zinc finger protein-like

SRNA\_AG01\_SoLexa\_Mi2008\_1\_46486\_hit1

5' UUAAGAAGUGACUG-AUGCACA  
|||||  
AAUUUAUCACUGACUUACG-GU 5'  
AT5G42080.2 1117 1137

dynammin-like protein (pir||S59558)

SRNA\_AG01\_SoLexa\_Mi2008\_1\_46486\_hit1

5' UUAAGAAGUGACUG-AUGCACA  
 ||||| ||||| ||||| ||  
 AAUUAUUCACUGACUUACG-GU 5'

AT5G42080.1 1120 1140  
 dynammin-like protein (pir||S59558)

SRNA\_AG01\_SoLexa\_Mi2008\_12\_11898\_hit1

5' CUGGAGACAAUGGAAGACU  
 ||||| ||||| :|||  
 UACCUCUGUUAUCUUCUGA 5'

AT5G42080.2 1451 1469  
 dynammin-like protein (pir||S59558)

SRNA\_AG01\_SoLexa\_Mi2008\_12\_11898\_hit1

5' CUGGAGACAAUGGAAGACU  
 ||||| ||||| :|||  
 UACCUCUGUUAUCUUCUGA 5'

AT5G42080.1 1454 1472  
 dynammin-like protein (pir||S59558)

SRNA\_AG01\_SoLexa\_Mi2008\_1\_32995\_hit1

5' UCUAUCGCCGGAUUUAUGUCA  
 ||||| ||||| | || |||||  
 AGAUAGCGGCGU-AA-ACAGU 5'

AT5G42080.1 1590 1608  
 dynammin-like protein (pir||S59558)

SRNA\_AG01\_SoLexa\_Mi2008\_2\_14498\_hit1

5' GCCAAAGAAAUGGACGAGG  
 ||||| ||||| |||||  
 GCGUUUCUUUACCAGCUCC 5'

AT5G42080.1 1887 1905  
 dynammin-like protein (pir||S59558)

SRNA\_AG01\_SoLexa\_Mi2008\_1\_25234\_hit1

5' UAUGAACUUGAUGACCCGCC  
 ||||| ||||| ||||| ||||| |||||  
 AUACUUGAACUACUGGGCGGG 5'

AT5G42650.1 1051 1071  
 allene oxide synthase (emb|CAA73184.1)

SRNA\_AG01\_SoLexa\_Mi2008\_1\_15261\_hit5

5' GGGUCGAGUGAUGUGAUUGAG  
 :|| ||||| ||||| |||||  
 UCC-GCUCACAACACUAACUC 5'

AT5G42650.1 4 23  
 allene oxide synthase (emb|CAA73184.1)

SRNA\_AG01\_SoLexa\_Mi2008\_2\_13457\_hit1

5' GAAGAUGAAGAUGAAGUGGUA  
 ||||| ||||| ||||| || ||  
 CUUCUUCUUCUACUU-AC-AU 5'

AT5G43060.1 17 35  
 cysteine protease component of protease-inhibitor complex

SRNA\_AG01\_SoLexa\_Mi2008\_1\_42997\_hit306

5' UGGUCA-AA-AUGUGUCACAAUC  
 ||||| || ||||| ||||| |||||  
 ACCAAUUAUCUACACAGUGUUAG 5'

AT5G43060.1 621 643



unknown protein

SRNA\_AG01\_SoLexa\_Mi2008\_3\_56550\_hit1

5' UUUU-GGGUGCGAUUUUGGUUA  
 |||| |||| |||||:|||||  
 AAAACCCCA-GCUAAAGCCAAU 5'  
 AT5G48540.1 464 484  
 33 kDa secretory protein-like

SRNA\_AG01\_SoLexa\_Mi2008\_1\_27863\_hit1

5' UCACUAAU-GACAAUGAGUGUC  
 ||| |||| |||||:|||||  
 AGU-AUUAUCUGUUACUCACAA 5'  
 AT5G50160.1 1170 1190  
 FRO1 and FRO2-like protein

SRNA\_AG01\_SoLexa\_Mi2008\_1\_53198\_hit1

5' UUGGUUGCGAUGAUGAUGUUG  
 ||| ||| |||||:|||||  
 AAC-AAC-CUACUACUACAAC 5'  
 AT5G50160.1 296 314  
 FRO1 and FRO2-like protein

SRNA\_AG01\_SoLexa\_Mi2008\_1\_21052\_hit1

5' UAGACCAAACUGUGAUAGU  
 |||||:|||||  
 AUCUGUUUGGA-AC-AUCG 5'  
 AT5G50160.1 527 544  
 FRO1 and FRO2-like protein

SRNA\_AG01\_SoLexa\_Mi2008\_1\_13614\_hit8

5' GACAGAAGAGAGAGAGCAC  
 || |||||:|||||  
 CU-UCUUCUCUCUCU-GUA 5'  
 AT5G50160.1 556 572  
 FRO1 and FRO2-like protein

SRNA\_AG01\_SoLexa\_Mi2008\_2\_8245\_hit1

5' CGAAAAGAAGAAGAUGAUGAG  
 |||||:|||||  
 GCUUUUCUUCUCU-CU-CUC 5'  
 AT5G50160.1 560 578  
 FRO1 and FRO2-like protein

SRNA\_AG01\_SoLexa\_Mi2008\_3\_3428\_hit1

5' AUGGUUUUUGACAGGCAG-GAA  
 |||||:|||||  
 UACCAAAAACUGUCC-UCACUG 5'  
 AT5G50260.1 700 720  
 cysteine endopeptidase

SRNA\_AG01\_SoLexa\_Mi2008\_1\_98\_hit1

5' AA-AAAAUUGUUGCACUUGUU  
 || ||||| |||||:|||||  
 UUGUUUUA-CAACGUGAACAA 5'  
 AT5G52390.1 1003 1022  
 photoassimilate-responsive protein PAR-like protein

SRNA\_AG01\_SoLexa\_Mi2008\_2\_41008\_hit1

5' UG-GAUUCCAACGAUGCGGUCC  
 || |||||:|||||  
 ACUCUAAGGUUGUACG-CAGG 5'  
 AT5G52390.1 382 402

flowers\_1sup\_AG01\_SoLexa\_Mi\_Cell\_2008\_hit\_target\_site.txt  
photoassimilate-responsive protein PAR-like protein

SRNA\_AG01\_SoLexa\_Mi2008\_4\_55164\_hit2  
5' UUUGAGCUC-AGGUGGUAGUCA  
| | | | | | | | | | | | | | | | | | | | | |  
AAACUCGAGCU-CACCAUAAGU 5'  
AT5G53450.2 497 517  
unknown protein

SRNA\_AG01\_SoLexa\_Mi2008\_4\_55164\_hit2  
5' UUUGAGCUC-AGGUGGUAGUCA  
| | | | | | | | | | | | | | | | | | | | | |  
AAACUCGAGCU-CACCAUAAGU 5'  
AT5G53450.1 566 586  
unknown protein

SRNA\_AG01\_SoLexa\_Mi2008\_1\_13489\_hit1  
5' GAAGGAAGAAAGUUAGAGU  
| | | | | | | | | | | | | | | | | | | | | |  
CUUC-UUCUUUCAUUCUCC 5'  
AT5G53550.1 1595 1612  
EspB-like protein

SRNA\_AG01\_SoLexa\_Mi2008\_2\_56650\_hit2  
5' UUUUUCAGGAAUG-GUUGAU  
: | | | | | | | | | | | | | | | | | | | | | |  
GAAAAGUCCUU-CUCAACUA 5'  
AT5G53550.1 970 988  
EspB-like protein

SRNA\_AG01\_SoLexa\_Mi2008\_1\_3901\_hit3  
5' CAAAACGAAGAAGAUGAUGAG  
| | | | | | | | | | | | | | | | | | | | | |  
GGUUUGCUCUUCUACUACUC 5'  
AT5G53730.1 214 234  
putative protein

SRNA\_AG01\_SoLexa\_Mi2008\_1\_37225\_hit4  
5' UGAUGAUGAUGAUGAUGAAGAAG  
| | | | | | | | | | | | | | | | | | | | | |  
ACU-CUACUACUACUACUUCUUC 5'  
AT5G53730.1 68 89  
putative protein

SRNA\_AG01\_SoLexa\_Mi2008\_1\_13759\_hit1  
5' GACGAUGAUGAUGAUGACA  
| | | | | | | | | | | | | | | | | | | | | |  
CU-CUACUACUACUACUUC 5'  
AT5G53730.1 71 88  
putative protein

SRNA\_AG01\_SoLexa\_Mi2008\_5\_13760\_hit2  
5' GACGAUGAUGAUGAUGAGC  
| | | | | | | | | | | | | | | | | | | | | |  
CU-CUACUACUACUACUUC 5'  
AT5G53730.1 71 88  
putative protein

SRNA\_AG01\_SoLexa\_Mi2008\_1\_36323\_hit13  
5' UGAG-GAUGAUGAUGAUGAUGA  
| | | | | | | | | | | | | | | | | | | | | |  
ACUCUCU-CUACUACUACUACU 5'  
AT5G53730.1 73 93

putative protein

SRNA\_AG01\_SoLexa\_Mi2008\_1\_41417\_hit1

5' UGGCGAGAGUGAUGAUGAUGU  
 ||| ||||| |||||  
 ACCUCUCUCUCUACUACUACU 5'  
 AT5G53730.1 75 95  
 putative protein

SRNA\_AG01\_SoLexa\_Mi2008\_1\_36498\_hit1

5' UGAGGGUACUUUGUCAUUU  
 ||||| ||||| ||| |||  
 ACUCCCAUGAAAGCAG-AAA 5'  
 AT5G53950.1 625 643  
 CUC2 (dbj|BAA19529.1)

SRNA\_AG01\_SoLexa\_Mi2008\_2\_22079\_hit1

5' UAGCAGAGGGUAGUGUUC-GAU  
 ||||| ||||| || |||  
 AUCGGCUCCCAUCACCAGCCUA 5'  
 AT5G53950.1 711 732  
 CUC2 (dbj|BAA19529.1)

SRNA\_AG01\_SoLexa\_Mi2008\_370931\_40195\_hit2

5' UGGAGAAGCAGGGCAGUGCA  
 |||||:||||:|||||  
 ACCUCUUUGUCCUGUGCACGA 5'  
 AT5G53950.1 800 820  
 CUC2 (dbj|BAA19529.1)

SRNA\_AG01\_SoLexa\_Mi2008\_7589\_40199\_hit1

5' UGGAGAAGCAGGGCAGUGCG  
 |||||:||||:|||||  
 ACCUCUUUGUCCUGUGCACGA 5'  
 AT5G53950.1 800 820  
 CUC2 (dbj|BAA19529.1)

SRNA\_AG01\_SoLexa\_Mi2008\_404\_40194\_hit3

5' UGGAGAAGCAGGGCAGUGC  
 |||||:||||:|||||  
 ACCUCUUUGUCCUGUGCACG 5'  
 AT5G53950.1 801 820  
 CUC2 (dbj|BAA19529.1)

SRNA\_AG01\_SoLexa\_Mi2008\_3\_12041\_hit2

5' CUGGUAUUUU-ACAUUUUU  
 ||||| ||| |||||  
 AACCAUU-AAACUGUAUUAAA 5'  
 AT5G55620.1 563 582  
 unknown protein

SRNA\_AG01\_SoLexa\_Mi2008\_6\_13612\_hit1

5' GACAGAAGAAAGAGA-GCAC  
 || ||||| ||||| |||  
 CU-UCUUCUUUCUCUUCGUU 5'  
 AT5G55620.1 76 94  
 unknown protein

SRNA\_AG01\_SoLexa\_Mi2008\_6\_35236\_hit1

5' UGACAGAAGAAAGAGA-GCAC  
 ||| ||||| ||||| |||  
 ACU-UCUUCUUUCUCUUCGUU 5'  
 AT5G55620.1 76 95

unknown protein

SRNA\_AG01\_SoLexa\_Mi2008\_1\_45939\_hit1

5' UG-UUGACACAUGAUCCAUGGA  
 || ||| |||||:|||||||  
 ACGAAC-GUGUAUUAGGUACCU 5'  
 AT5G56870.1 733 753  
 beta-galactosidase (emb|CAB64740.1)

SRNA\_AG01\_SoLexa\_Mi2008\_1\_51535\_hit1

5' UUGCCAUUAGAGUAUACACAUG  
 ||||| || |||||  
 AACGG-AA-CUCAUAUGUGUAA 5'  
 AT5G57550.1 404 423  
 endoxyloglucan transferase (gb|AAD45127.1)

SRNA\_AG01\_SoLexa\_Mi2008\_2\_34651\_hit1

5' UGAAGCAGAAGUAGUGUAAA  
 ||||| |||||:|||  
 UCUUCGUCUUAACACCGUUU 5'  
 AT5G58220.2 272 292  
 unknown protein (At5g58220)

SRNA\_AG01\_SoLexa\_Mi2008\_2\_34651\_hit1

5' UGAAGCAGAAGUAGUGUAAA  
 ||||| |||||:|||  
 UCUUCGUCUUAACACCGUUU 5'  
 AT5G58220.3 274 294  
 unknown protein (At5g58220)

SRNA\_AG01\_SoLexa\_Mi2008\_1\_40627\_hit1

5' UGGAGGUGCCGAUGAUGCUAU  
 ||||| |||||:|||||||  
 ACCUC-ACGGUUACUACGAUA 5'  
 AT5G58350.1 1255 1274  
 MAP kinase

SRNA\_AG01\_SoLexa\_Mi2008\_1\_13759\_hit1

5' GACGAUGAUGAUGAUGACA  
 ||||| |||||  
 CUGCUACUACUAGUACUCC 5'  
 AT5G58350.1 1916 1934  
 MAP kinase

SRNA\_AG01\_SoLexa\_Mi2008\_5\_13760\_hit2

5' GACGAUGAUGAUGAUGAGC  
 ||||| |||||  
 CUGCUACUACUAGUACUCC 5'  
 AT5G58350.1 1916 1934  
 MAP kinase

SRNA\_AG01\_SoLexa\_Mi2008\_1\_13759\_hit1

5' GACGAUGAUGAUGAUGA-CA  
 :|||||:||||| ||  
 UUGCUCUGCUACUACUAGU 5'  
 AT5G58350.1 1922 1941  
 MAP kinase

SRNA\_AG01\_SoLexa\_Mi2008\_1\_38921\_hit1

5' UGCGG-ACGAUGAUGAUGAUGAU  
 |:||| |||||:|||||||  
 AUGCCAUGCUACUGCUACUACUA 5'  
 AT5G58350.1 1924 1946

flowers\_1sup\_AG01\_SoLexa\_Mi\_Cell\_2008\_hit\_target\_site.txt

MAP kinase

SRNA\_AG01\_SoLexa\_Mi2008\_1\_23760\_hit1

5' UAGUCG-ACAAACGAAUGAUGG  
 |||| | | |||||||  
 AUCA-CAUCUUUGCUUACUACC 5'  
 AT5G58350.1 952 972  
 MAP kinase

SRNA\_AG01\_SoLexa\_Mi2008\_2\_4149\_hit1

5' CAAAGGCAGAAGAUGAUGACAG  
 ||||| | :  
 GUUCCGUUUUACUACUGAU 5'  
 AT5G59780.1 1022 1043  
 MYB27 protein - like

SRNA\_AG01\_SoLexa\_Mi2008\_1\_29192\_hit1

5' UCCAAAGGCAGAAGAUGAUGA  
 ||||| | :  
 UUGUUCCGUUUUACUACU 5'  
 AT5G59780.1 1025 1045  
 MYB27 protein - like

SRNA\_AG01\_SoLexa\_Mi2008\_1\_42751\_hit2

5' UGGGUGGUGA-UUGUGAGUGAA  
 ||||| | | | | |  
 ACCCACCACUAAAAACU-ACAUU 5'  
 AT5G59780.3 865 886  
 MYB27 protein - like

SRNA\_AG01\_SoLexa\_Mi2008\_1\_42751\_hit2

5' UGGGUGGUGA-UUGUGAGUGAA  
 ||||| | | | | |  
 ACCCACCACUAAAAACU-ACAUU 5'  
 AT5G59780.2 890 911  
 MYB27 protein - like

SRNA\_AG01\_SoLexa\_Mi2008\_2\_4149\_hit1

5' CAAAGGCAGAAGAUGAUGACAG  
 ||||| | :  
 GUUCCGUUUUACUACUGAU 5'  
 AT5G59780.3 904 925  
 MYB27 protein - like

SRNA\_AG01\_SoLexa\_Mi2008\_1\_29192\_hit1

5' UCCAAAGGCAGAAGAUGAUGA  
 ||||| | :  
 UUGUUCCGUUUUACUACU 5'  
 AT5G59780.3 907 927  
 MYB27 protein - like

SRNA\_AG01\_SoLexa\_Mi2008\_2\_4149\_hit1

5' CAAAGGCAGAAGAUGAUGACAG  
 ||||| | :  
 GUUCCGUUUUACUACUGAU 5'  
 AT5G59780.2 929 950  
 MYB27 protein - like

SRNA\_AG01\_SoLexa\_Mi2008\_1\_29192\_hit1

5' UCCAAAGGCAGAAGAUGAUGA  
 ||||| | :  
 UUGUUCCGUUUUACUACU 5'  
 AT5G59780.2 932 952

MYB27 protein - like

SRNA\_AG01\_SoLexa\_Mi2008\_1\_42751\_hit2

5' UGGGUGGUGA-UUGUGAGUGUAA  
||||||| || ||| |||||  
ACCCACCACUAAAAACU-ACAUU 5'  
AT5G59780.1 983 1004  
MYB27 protein - like

SRNA\_AG01\_SoLexa\_Mi2008\_1\_41800\_hit8

5' UGGGACUAGGAUGCGUACUGA  
||||| ||||| || ||  
ACCCUGUCCUACGC-UG-CU 5'  
AT5G59820.1 339 357  
zinc finger protein Zat12

SRNA\_AG01\_SoLexa\_Mi2008\_7\_12746\_hit1

5' CUUGACCUUGUAAGACCCC  
|||||||:|||||  
GAACUGGAACGUUCUGGAA 5'  
AT5G60450.1 1873 1891  
auxin response factor 4

SRNA\_AG01\_SoLexa\_Mi2008\_7\_49852\_hit1

5' UUCUUGACCUUGUAAGACCCC  
|||||||:|||||  
AAGAACUGGAACGUUCUGGAA 5'  
AT5G60450.1 1873 1893  
auxin response factor 4

SRNA\_AG01\_SoLexa\_Mi2008\_4\_55012\_hit1

5' UUUCUUGACCUUGUAAGACCCC  
|||||||:|||||  
AAAGAACUGGAACGUUCUGGAA 5'  
AT5G60450.1 1873 1894  
auxin response factor 4

SRNA\_AG01\_SoLexa\_Mi2008\_1\_55011\_hit1

5' UUUCUUGACCUUGUAAGACCC  
|||||||:|||||  
AAAGAACUGGAACGUUCUGGA 5'  
AT5G60450.1 1874 1894  
auxin response factor 4

SRNA\_AG01\_SoLexa\_Mi2008\_19\_29991\_hit1

5' UCCGGCGGUUCAUAACAUCAA  
|||||||  
AGGCCGCAAGUAUUGUAGUU 5'  
AT5G60450.1 1925 1945  
auxin response factor 4

SRNA\_AG01\_SoLexa\_Mi2008\_2\_24987\_hit1

5' UAUCCGGCGGUUCAUAACAUC  
|||||||  
AUAGGCCGCAAGUAUUGUAG 5'  
AT5G60450.1 1927 1947  
auxin response factor 4

SRNA\_AG01\_SoLexa\_Mi2008\_8\_4564\_hit1

5' CAAGAACUGGAUUUGCAUGAGA  
|||||||  
GUUCUUGACCUAAACGUACUCU 5'  
AT5G60450.1 1966 1987

auxin response factor 4

SRNA\_AG01\_SoLexa\_Mi2008\_7\_4563\_hit1

5' CAAGAACUGGAUUUGCAUGAG  
|||||  
GUUCUUGACCUAAACGUACUC 5'  
AT5G60450.1 1967 1987  
auxin response factor 4

SRNA\_AG01\_SoLexa\_Mi2008\_1\_34330\_hit1

5' UGAACAAGCUGGGUUCACGCC  
|||||  
ACUUGUUCGACCCAAGUGCGG 5'  
AT5G60450.1 2035 2055  
auxin response factor 4

SRNA\_AG01\_SoLexa\_Mi2008\_7\_33918\_hit1

5' UCUUGACCUUGUAAGACCCCA  
|||||:|||||  
AGAACUGGAACGUUCUGGGAA 5'  
AT5G60450.1 2082 2102  
auxin response factor 4

SRNA\_AG01\_SoLexa\_Mi2008\_7\_49853\_hit1

5' UUCUUGACCUUGUAAGACCCCA  
|||||:|||||  
AAGAACUGGAACGUUCUGGGAA 5'  
AT5G60450.1 2082 2103  
auxin response factor 4

SRNA\_AG01\_SoLexa\_Mi2008\_7\_12746\_hit1

5' CUUGACCUUGUAAGACCCC  
|||||:|||||  
GAACUGGAACGUUCUGGGA 5'  
AT5G60450.1 2083 2101  
auxin response factor 4

SRNA\_AG01\_SoLexa\_Mi2008\_7\_49852\_hit1

5' UUCUUGACCUUGUAAGACCCC  
|||||:|||||  
AAGAACUGGAACGUUCUGGGA 5'  
AT5G60450.1 2083 2103  
auxin response factor 4

SRNA\_AG01\_SoLexa\_Mi2008\_4\_55012\_hit1

5' UUUCUUGACCUUGUAAGACCCC  
|||||:|||||  
AAAGAACUGGAACGUUCUGGGA 5'  
AT5G60450.1 2083 2104  
auxin response factor 4

SRNA\_AG01\_SoLexa\_Mi2008\_1\_55011\_hit1

5' UUUCUUGACCUUGUAAGACCCC  
|||||:|||||  
AAAGAACUGGAACGUUCUGGG 5'  
AT5G60450.1 2084 2104  
auxin response factor 4

SRNA\_AG01\_SoLexa\_Mi2008\_2\_34797\_hit1

5' UGAAGGGGGACCCGAGGAUUG  
|||||  
ACUUCUUUUUGGGCUCCUAAC 5'  
AT5G60450.1 2266 2286

auxin response factor 4

SRNA\_AG01\_SoLexa\_Mi2008\_3\_13421\_hit1

5' GAAGAAGAAGAUGAUGUUGAU  
 |||||  
 CUUCUUCUUCUUCUACCACUU 5'  
 AT5G60450.1 621 641  
 auxin response factor 4

SRNA\_AG01\_SoLexa\_Mi2008\_1\_7242\_hit1

5' CAUGGAGAAGAAGAAUGA-GGU  
 ||||:|||||  
 GUACUUCUUCUUCU-CUACCA 5'  
 AT5G60450.1 625 645  
 auxin response factor 4

SRNA\_AG01\_SoLexa\_Mi2008\_1\_25289\_hit1

5' UAUGACGAUGAUGAUGACGGA  
 :|||||  
 GUACUGCUACUACUA-GGCCU 5'  
 AT5G60450.1 650 669  
 auxin response factor 4

SRNA\_AG01\_SoLexa\_Mi2008\_9\_14254\_hit8

5' GAUGAUGAUGAUGAUGAUCUU  
 |||||:|||||  
 CUACUACUGCUACUACUAGGC 5'  
 AT5G60450.1 651 671  
 auxin response factor 4

SRNA\_AG01\_SoLexa\_Mi2008\_7\_3078\_hit1

5' AUGAUGAUGA-GAAUGAUGAU  
 |||||  
 AACUACUACUGCU-ACUACUA 5'  
 AT5G60450.1 655 674  
 auxin response factor 4

SRNA\_AG01\_SoLexa\_Mi2008\_1\_45039\_hit3

5' UGU-GAUGAUGAUGAUGAUGAUGA  
 ||| || |||||:|||||  
 ACAUCUUCUACUACUGCUACUACU 5'  
 AT5G60450.1 656 679  
 auxin response factor 4

SRNA\_AG01\_SoLexa\_Mi2008\_1\_10092\_hit1

5' CUAGAAGAUGAUGACGAUUGA  
 |||||  
 GAUCUUCUACUACUGCUA-CU 5'  
 AT5G60450.1 659 678  
 auxin response factor 4

SRNA\_AG01\_SoLexa\_Mi2008\_3\_35894\_hit1

5' UGAGAGCAGAGAAAGAGAGU  
 |||||  
 ACUCUC-UCUCUUUCUCUCC 5'  
 AT5G60450.1 67 85  
 auxin response factor 4

SRNA\_AG01\_SoLexa\_Mi2008\_2\_34470\_hit2

5' UGAACUCGUUGAAUACAUCAG  
 ||| |||||  
 UCUUAAGCAACUUAAGUAGUC 5'  
 AT5G60890.1 1008 1028

Myb transcription factor homolog (ATR1)

SRNA\_AG01\_SoLexa\_Mi2008\_31\_14606\_hit1

5' GCCGGGGUUUUGUGUAUAC  
|||||:||||||| |||

CGGCCUCAAAACACU-UAG 5'

AT5G60890.1 885 902

Myb transcription factor homolog (ATR1)

SRNA\_AG01\_SoLexa\_Mi2008\_24\_32530\_hit1

5' UCGU-GCCGGGGUUUUGUGUAU  
|||| |||||:||||||| ||

AGCAGCGGCCUCAAAACACU-UA 5'

AT5G60890.1 886 907

Myb transcription factor homolog (ATR1)

SRNA\_AG01\_SoLexa\_Mi2008\_1\_20014\_hit1

5' UACGAAAGGAACAACAUUUU  
|| ||||| |||||||| |||

AU-CUUUCGUUGUUGUAACUAA 5'

AT5G61520.1 1007 1027

monosaccharide transporter STP3

SRNA\_AG01\_SoLexa\_Mi2008\_1\_20014\_hit1

5' UACGAAAGGAACAACAUUUU  
|| ||||| |||||||| |||

AU-CUUUCGUUGUUGUAACUAA 5'

AT5G61520.2 1155 1175

monosaccharide transporter STP3

SRNA\_AG01\_SoLexa\_Mi2008\_1\_3\_hit25

5' AAAAA-AAAAAAAAAGAAAGA  
||| ||||||||

ACUUUGUUUUUUUCUUUCU 5'

AT5G61520.2 223 242

monosaccharide transporter STP3

SRNA\_AG01\_SoLexa\_Mi2008\_1\_16934\_hit1

5' UAAAGUGAGGA-UCAAGC-GGU  
||||||| | ||||| |||

AUUUCACUCCUAACUUCGUCCA 5'

AT5G61520.1 740 761

monosaccharide transporter STP3

SRNA\_AG01\_SoLexa\_Mi2008\_1\_16934\_hit1

5' UAAAGUGAGGA-UCAAGC-GGU  
||||||| | ||||| |||

AUUUCACUCCUAACUUCGUCCA 5'

AT5G61520.2 888 909

monosaccharide transporter STP3

SRNA\_AG01\_SoLexa\_Mi2008\_3\_39824\_hit1

5' UGGAAUACUUGAAC-UACCAUCU  
||||||| ||| ||||||||

ACCUUAUGA-CUUUUAUGGUAGA 5'

AT5G61600.1 719 740

DNA binding protein - like

SRNA\_AG01\_SoLexa\_Mi2008\_2\_5441\_hit1

5' CACCACCACCACCAGCGCCGC  
||||||| |||||:|

GUGGUGGUGGUGGUGGCGGUG 5'

AT5G61660.1 399 419

unknown protein

SRNA\_AG01\_SoLexa\_Mi2008\_1\_7688\_hit1

```
5' CCACCACCACCUCAGCGCCAC
  ||| | | | | | | | | | | | | | |
  GGUGGUGGUGGUGGUGGCGGUG 5'
AT5G61660.1    399    420
```

unknown protein

SRNA\_AG01\_SoLexa\_Mi2008\_1\_1510\_hit1

```
5' ACCACCACCACCAGCGCCGCC
  ||| | | | | | | | | | | | | | |
  UGGUGGUGGUGGUGGUGGCGG 5'
AT5G61660.1    401    421
```

unknown protein

SRNA\_AG01\_SoLexa\_Mi2008\_2\_5441\_hit1

```
5' CACCACCACCACCAGCGCCGC
  ||| | | | | | | | | | | | | | |
  UUGGUGGUGGUGGUGGUGGCG 5'
AT5G61660.1    402    422
```

unknown protein

SRNA\_AG01\_SoLexa\_Mi2008\_10\_35767\_hit2

```
5' UGAGAAAGAUGAGA-UCACA
  :||| | | | | | | | | | | | | | |
  GCUCUUUCUACUCUUAGUCU 5'
AT5G62530.1    99    118
delta-1-pyrroline-5-carboxylate dehydrogenase precursor (P5CDH)
```

SRNA\_AG01\_SoLexa\_Mi2008\_1\_17123\_hit1

```
5' UAAAUUUUCAGAUUGUUAUU
  ||| | | | | | | | | | | | | | |
  AUUUAAAGGUCUACCAA-AA 5'
AT5G63800.1    2308   2326
beta-galactosidase like protein
```

SRNA\_AG01\_SoLexa\_Mi2008\_1\_47432\_hit1

```
5' UUAGAUAAAACAAAUGGA-UGAA
  ||| | | | | | | | | | | | | | |
  AAUCUAAUUGUUUAGCUAACUG 5'
AT5G63800.1    43    64
beta-galactosidase like protein
```

SRNA\_AG01\_SoLexa\_Mi2008\_2\_9726\_hit2

```
5' CUAAGUUUGG AUGCUCU-UUGA
  ||| | | | | | | | | | | | | | |
  AAUUCAAACCUAGGAGACAACU 5'
AT5G63800.1    7    28
beta-galactosidase like protein
```

SRNA\_AG01\_SoLexa\_Mi2008\_1\_35874\_hit2

```
5' UGAGAGACAAAUGAGAAGGU
  ||| | | | | | | | | | | | | | |
  ACUCUCUGUUUU-CUCUCAA 5'
AT5G64090.1    20    39
unknown protein
```

SRNA\_AG01\_SoLexa\_Mi2008\_1\_18966\_hit2

```
5' UAAUUGUUGUUGUGUAUGGA
  ||| | | | | | | | | | | | | | |
  UUUACAACAACACA-ACCU 5'
AT5G64620.1    114   132
```

flowers\_1sup\_AG01\_SoLexa\_Mi\_Cell\_2008\_hit\_target\_site.txt  
invertase inhibitor homolog (emb|CAA73335.1)

SRNA\_AG01\_SoLexa\_Mi2008\_2\_46703\_hit1

5' UUAAUCAAGGUCGUACAUUGC  
          |||||: |  
          AAUUAGUCCAUCAUGUAAUU 5'

AT5G65310.2       37       57  
homeobox-leucine zipper protein ATHB-5 (HD-zip protein ATHB-5) (sp|P46667)

SRNA\_AG01\_SoLexa\_Mi2008\_7\_12746\_hit1

5' CUUGACCUUGUAAG-ACCCC  
          ||| ||||| |  
          GAAGUGGAACAUUCUUGGU 5'

AT5G67370.1       703       722  
putative protein

stems\_1sup\_AG01\_SoLexa\_Mi\_Cell\_2008\_hit\_target\_site.txt

SRNA\_AG01\_SoLexa\_Mi2008\_3\_23994\_hit1

5' UAGUGGUGUCA AUGUACAUG  
||||||| |||||||||  
AUCACCAC-GUUACAUUGUAC 5'

AT1G02850.5 479 498  
Similar to beta-glucosidases (At1g02850)

SRNA\_AG01\_SoLexa\_Mi2008\_1\_1909\_hit1

5' AGAGCAAUCGUGAAGAUG-GAU  
||||||| ||||| | |||  
UCUCGUUAGCUCUUCU-CUCUA 5'

AT1G04120.1 124 144  
multi-drug resistance protein

SRNA\_AG01\_SoLexa\_Mi2008\_3\_768\_hit1

5' AAGAAGAGAGAGAAUUGAG  
||||||| ||||||| |||||  
UUCUUCUAUCUCUU-ACUC 5'

AT1G04120.1 187 204  
multi-drug resistance protein

SRNA\_AG01\_SoLexa\_Mi2008\_3\_13733\_hit1

5' GACGAAGAUGAUGAACGACA  
:||||||| ||||| |||||  
UUGCUUCUAGUACUU-CUGG 5'

AT1G04120.1 4347 4365  
multi-drug resistance protein

SRNA\_AG01\_SoLexa\_Mi2008\_1\_27166\_hit1

5' UCAAGCUGG-UCAAGAUGUGCU  
||||| ||| ||||||| |||||  
AGUUC-ACCCAGUUCUAAACGA 5'

AT1G04120.1 4418 4438  
multi-drug resistance protein

SRNA\_AG01\_SoLexa\_Mi2008\_2\_27439\_hit1

5' UCAAUG-CAUGUGGCUGUCAACA  
||||| | |||||:|||||||  
AGUU-CAGUACAUCGACAGUUGU 5'

AT1G05570.1 2658 2679  
putative glucan synthase

SRNA\_AG01\_SoLexa\_Mi2008\_7\_3892\_hit1

5' CAAAACCAGAAGGA-UGAUAAAG  
||||||| ||| ||| |||||  
GUUUUGGUCUGCCUAACU-UUUC 5'

AT1G05570.1 5113 5134  
putative glucan synthase

SRNA\_AG01\_SoLexa\_Mi2008\_1\_3891\_hit1

5' CAAAACCAGAAGGA-UGAUAAA  
||||||| ||| ||| |||||  
GUUUUGGUCUGCCUAACU-UUU 5'

AT1G05570.1 5114 5134  
putative glucan synthase

SRNA\_AG01\_SoLexa\_Mi2008\_3\_6611\_hit1

5' CAGGUCAACAACAUCUUUC  
||| ||| |||||||||  
GUC-AGUAGUUGUUAGAAA 5'

AT1G05570.1 5141 5159  
putative glucan synthase

stems\_1sup\_AG01\_SoLexa\_Mi\_Cell\_2008\_hit\_target\_site.txt

SRNA\_AG01\_SoLexa\_Mi2008\_1\_54576\_hit1

5' UUUUAGAGCUCUAAAACGACGUC  
||| || ||| |||||  
AAA-ACGCGA-AUUUUGCUGCAG 5'  
AT1G05710.3 136 156  
unknown protein

SRNA\_AG01\_SoLexa\_Mi2008\_1\_34211\_hit3

5' UGAAAGAGAGAUGAGAGCUUU  
||| ||| ||| |||  
ACUUUCUCUCUAGUCU-GAAC 5'  
AT1G05710.4 149 168  
unknown protein

SRNA\_AG01\_SoLexa\_Mi2008\_1\_34211\_hit3

5' UGAAAGAGAGAUGAGAGCUUU  
||| ||| ||| |||  
ACUUUCUCUCUAGUCU-GAAC 5'  
AT1G05710.1 260 279  
unknown protein

SRNA\_AG01\_SoLexa\_Mi2008\_1\_34211\_hit3

5' UGAAAGAGAGAUGAGAGCUUU  
||| ||| ||| |||  
ACUUUCUCUCUAGUCU-GAAC 5'  
AT1G05710.3 521 540  
unknown protein

SRNA\_AG01\_SoLexa\_Mi2008\_2\_41651\_hit1

5' UGGCUUAAACACAACGUU-GUAG  
||| ||| ||| |||  
ACCGAAUUGUGUUUC-UAGCAUC 5'  
AT1G05710.4 536 557  
unknown protein

SRNA\_AG01\_SoLexa\_Mi2008\_2\_41651\_hit1

5' UGGCUUAAACACAACGUU-GUAG  
||| ||| ||| |||  
ACCGAAUUGUGUUUC-UAGCAUC 5'  
AT1G05710.1 647 668  
unknown protein

SRNA\_AG01\_SoLexa\_Mi2008\_2\_41651\_hit1

5' UGGCUUAAACACAACGUU-GUAG  
||| ||| ||| |||  
ACCGAAUUGUGUUUC-UAGCAUC 5'  
AT1G05710.3 908 929  
unknown protein

SRNA\_AG01\_SoLexa\_Mi2008\_2\_41651\_hit1

5' UGGCUUAAACACAACGUU-GUAG  
||| ||| ||| |||  
ACCGAAUUGUGUUUC-UAGCAUC 5'  
AT1G05710.2 974 995  
unknown protein

SRNA\_AG01\_SoLexa\_Mi2008\_1\_27132\_hit1

5' UCAAGCACC-AGCUCGAAGAAG  
||| | || |||||  
AGUUGG-GGAUCGAGCUUCUUC 5'  
AT1G06150.1 217 237  
unknown protein

stems\_1sup\_AG01\_SoIexa\_Mi\_Cell\_2008\_hit\_target\_site.txt

SRNA\_AG01\_SoIexa\_Mi2008\_1\_44921\_hit1

```
5' UGUGAAUGAUGCUAUUUGUG
      ||||| |||||
      UGACUUACAACGAUUAACAC 5'
AT1G06150.1    2946    2966
unknown protein
```

SRNA\_AG01\_SoIexa\_Mi2008\_1\_34211\_hit3

```
5' UGAAAGAGAGAUGAGA-GCUUU
      ||||| ||||| | :|||
      ACUUUCUCUCUACU-UGUGAAA 5'
AT1G06150.1    42      62
unknown protein
```

SRNA\_AG01\_SoIexa\_Mi2008\_1\_3874\_hit3

```
5' CAAAAUUGAUUGAUG-A-GAA
      || ||||| ||||| | |||
      GUCUUACUACUACUACUUCUU 5'
AT1G06160.1    142     162
ethylene response factor, putative
```

SRNA\_AG01\_SoIexa\_Mi2008\_1\_13420\_hit2

```
5' GAAGAAGAAGAAGACUCUU
      ||||| ||||| | ||
      CUUCUUCUUCUUCU-A-AA 5'
AT1G06160.1    580     596
ethylene response factor, putative
```

SRNA\_AG01\_SoIexa\_Mi2008\_8\_56168\_hit1

```
5' UUUGUGUUCUCAGGUCACCCUU
      ||||| ||||| |||||
      AAACACUAGAGUCCUUUGGGGAA 5'
AT1G08830.1    116     138
superoxidase dismutase
```

SRNA\_AG01\_SoIexa\_Mi2008\_1\_26464\_hit13

```
5' UAUUUCAGGAAAUCAGA-UGGCA
      | ||| ||||| |||||
      ACAAGACCUUUAGUCUUACCGU 5'
AT1G10450.1    1510    1532
unknown protein
```

SRNA\_AG01\_SoIexa\_Mi2008\_1\_369\_hit5

```
5' AAAGAAUGCCAAUGAUGAGGU
      ||||| ||||| ||||| :
      UUUCUUACGGUUUCUAC-CCG 5'
AT1G10450.1    1854    1873
unknown protein
```

SRNA\_AG01\_SoIexa\_Mi2008\_1\_36675\_hit1

```
5' UG-AGGUUGCAGAUUCUUGG
      || || ||||| |||||
      ACAUC-AACGUCUUCGAACC 5'
AT1G10450.1    2981    2999
unknown protein
```

SRNA\_AG01\_SoIexa\_Mi2008\_1\_8542\_hit1

```
5' CGAGCAAGUGACAACGGUU-UC
      ||||| ||||| | :|||
      GCUCGUUCACUGUU-CUAAGAG 5'
AT1G10450.1    841     861
unknown protein
```

stems\_1sup\_AG01\_SoLexa\_Mi\_Cell\_2008\_hit\_target\_site.txt

SRNA\_AG01\_SoLexa\_Mi2008\_1\_40683\_hit1

5' UGGAGUCAGACG-AGCAAGUGA  
 :||||||||| || |||||||||||  
 GCCUCAGUC-GCCUCGUUCACU 5'  
 AT1G10450.1 851 871  
 unknown protein

SRNA\_AG01\_SoLexa\_Mi2008\_1\_56685\_hit2

5' UUUUUUCAGUUGUAUUUG-UGU  
 ||||||||||| |||:| |||  
 AAAAAAGUCAAGAUAGACGACA 5'  
 AT1G10450.1 937 958  
 unknown protein

SRNA\_AG01\_SoLexa\_Mi2008\_1\_13075\_hit1

5' CUUGUGAUUUCAGAUUUGCUU  
 ||||||||||| ||||| |||  
 UAACACUAAAGGCUAUA-GAA 5'  
 AT1G10450.1 977 996  
 unknown protein

SRNA\_AG01\_SoLexa\_Mi2008\_8\_1538\_hit1

5' ACCGAUGAUGAUU-AUUGCUA  
 ||||||||||||| | ||| |  
 UGGCUACUACUAAACUCACGCU 5'  
 AT1G10970.1 999 1019  
 zinc transporter like protein (ZIP4)

SRNA\_AG01\_SoLexa\_Mi2008\_1\_18608\_hit1

5' UAAUAAGCUGAGCGAGGAUCA  
 ||||| ||||||||||| ||  
 AUUAUUAGACUCGCUCUCCU-GU 5'  
 AT1G11670.1 823 842  
 unknown protein

SRNA\_AG01\_SoLexa\_Mi2008\_1\_1059\_hit1

5' AAU-GAAAGUAGAGAGAGCU  
 ||| ||||||| ||||||| |  
 UUAACUUUCAUGUCUCUCA 5'  
 AT1G12520.1 1109 1128  
 Cu/Zn superoxide dismutase copper chaperone like protein

SRNA\_AG01\_SoLexa\_Mi2008\_1\_1059\_hit1

5' AAU-GAAAGUAGAGAGAGCU  
 ||| ||||||| ||||||| |  
 UUAACUUUCAUGUCUCUCA 5'  
 AT1G12520.2 1178 1197  
 Cu/Zn superoxide dismutase copper chaperone like protein

SRNA\_AG01\_SoLexa\_Mi2008\_1\_1059\_hit1

5' AAU-GAAAGUAGAGAGAGCU  
 ||| ||||||| ||||||| |  
 UUAACUUUCAUGUCUCUCA 5'  
 AT1G12520.3 1194 1213  
 Cu/Zn superoxide dismutase copper chaperone like protein

SRNA\_AG01\_SoLexa\_Mi2008\_1\_27462\_hit1

5' UCAAUGGAGGCAAUGAAUCGGU  
 ||||||||||||| |||||||||  
 AGUUACCUCGGUACUUAGCCA 5'  
 AT1G13640.1 104 125  
 unknown protein

stems\_1sup\_AG01\_SoLexa\_Mi\_Cell\_2008\_hit\_target\_site.txt

SRNA\_AG01\_SoLexa\_Mi2008\_4\_14108\_hit2

5' GAGGUAAA-GAUGAAAAGGA  
|:||||| |||||  
AUUCAUUUUCUACUUUCCU 5'  
AT1G15125.1 124 143  
putative protein

SRNA\_AG01\_SoLexa\_Mi2008\_4\_4868\_hit1

5' CAAG-GGAGCUUGGAUGAUGA  
|||| || |||||  
GUUCUCC-CGAACCUACUACU 5'  
AT1G15125.1 194 213  
putative protein

SRNA\_AG01\_SoLexa\_Mi2008\_7\_50046\_hit3

5' UUGAAGAGGACUUGGAACU  
||||||:|||||:||||  
AACUUCUUCUGAACUUUGA 5'  
AT1G15125.1 253 271  
putative protein

SRNA\_AG01\_SoLexa\_Mi2008\_26\_5458\_hit1

5' CACCAGAGUAUCCUGCAAG  
|||||||:| |||||  
GUGGUCUCGUCGGACGUUC 5'  
AT1G15750.1 1384 1402  
unknown protein (At1g15750)

SRNA\_AG01\_SoLexa\_Mi2008\_26\_5458\_hit1

5' CACCAGAGUAUCCUGCAAG  
|||||||:| |||||  
GUGGUCUCGUCGGACGUUC 5'  
AT1G15750.4 1385 1403  
unknown protein (At1g15750)

SRNA\_AG01\_SoLexa\_Mi2008\_26\_5458\_hit1

5' CACCAGAGUAUCCUGCAAG  
|||||||:| |||||  
GUGGUCUCGUCGGACGUUC 5'  
AT1G15750.2 1524 1542  
unknown protein (At1g15750)

SRNA\_AG01\_SoLexa\_Mi2008\_2\_13419\_hit2

5' GAAGAAGAAGAAGAC-ACUU  
||||||| |||||  
CUUCUUCUUCUUCUGGUGUC 5'  
AT1G15750.2 154 173  
unknown protein (At1g15750)

SRNA\_AG01\_SoLexa\_Mi2008\_26\_5458\_hit1

5' CACCAGAGUAUCCUGCAAG  
|||||||:| |||||  
GUGGUCUCGUCGGACGUUC 5'  
AT1G15750.3 1657 1675  
unknown protein (At1g15750)

SRNA\_AG01\_SoLexa\_Mi2008\_1\_20\_hit1

5' AAAAAAAGAGGUAAUUU-GGA  
||||||| |||||  
UUUUUUUCUUCUUUAAUCCA 5'  
AT1G15750.3 188 208  
unknown protein (At1g15750)

stems\_1sup\_AG01\_SoLexa\_Mi\_Cell\_2008\_hit\_target\_site.txt

SRNA\_AG01\_SoLexa\_Mi2008\_1\_20\_hit1

```
5' AAAAAAAGAGGUAAUUU-GGA
   ||| | | | | | | | | | | | | | |
   UUUUUUUUCUCCUUUAAAUCCA 5'
AT1G15750.1    22    42
unknown protein (At1g15750)
```

SRNA\_AG01\_SoLexa\_Mi2008\_2\_13419\_hit2

```
5' GAAGAAGAAGAAGAC-ACUU
   ||| | | | | | | | | | | | | | |
   CUUCUUCUUCUUCUGGUGUC 5'
AT1G15750.4    50    69
unknown protein (At1g15750)
```

SRNA\_AG01\_SoLexa\_Mi2008\_10\_30419\_hit1

```
5' UCGAACGCUUCACGGAUCUCUA
   ||| | | | | | | | | | | | | | |
   AGCUUUCGAGUGCCUAGAGAC 5'
AT1G18210.2    314   335
unknown protein
```

SRNA\_AG01\_SoLexa\_Mi2008\_1\_14930\_hit1

```
5' GGAUUGAAGGGAGCUCUAC
   ||| | | | | | | | | | | | | | |
   GGUAACUACCCUCGAGAUG 5'
AT1G18250.2    130   148
putative protein
```

SRNA\_AG01\_SoLexa\_Mi2008\_1\_14930\_hit1

```
5' GGAUUGAAGGGAGCUCUAC
   ||| | | | | | | | | | | | | | |
   GGUAACUACCCUCGAGAUG 5'
AT1G18250.1    25    43
putative protein
```

SRNA\_AG01\_SoLexa\_Mi2008\_1\_42552\_hit1

```
5' UGGGGUUGGUUGG-UUGGUUGG
   ||| | | | | | | | | | | | | | |
   ACCCCAACCAACCAAACCAACG 5'
AT1G19180.1    27    48
unknown protein
```

SRNA\_AG01\_SoLexa\_Mi2008\_1\_42552\_hit1

```
5' UGGGGUUGGUUGG-UUGGUUGG
   ||| | | | | | | | | | | | | | |
   ACCCCAACCAACCAAACCAACG 5'
AT1G19180.2    7    28
unknown protein
```

SRNA\_AG01\_SoLexa\_Mi2008\_1\_36931\_hit2

```
5' UGAUAACCGUAGA-GCCGAUGG
   ||| | | | | | | | | | | | | | |
   ACUAUUGGC-UCUUCGGCUACC 5'
AT1G21270.1   1076   1096
putative protein
```

SRNA\_AG01\_SoLexa\_Mi2008\_2\_35299\_hit10

```
5' UGACAUCAACAUUUAAUGGCC
   ||| | | | | | | | | | | | | | |
   ACUGUAGUUGUAAACUACCGG 5'
AT1G21270.1   1213   1233
putative protein
```

stems\_1sup\_AG01\_SoLexa\_Mi\_Cell\_2008\_hit\_target\_site.txt

SRNA\_AG01\_SoLexa\_Mi2008\_3\_20869\_hit2

5' UA-GAACUUGAUUUAUCAUGAU  
|| ||||| ||||| |||||  
AUACUUGUACUAAUAACUACUA 5'  
AT1G21270.1 2369 2390  
putative protein

SRNA\_AG01\_SoLexa\_Mi2008\_12\_5493\_hit2

5' CACCCAUUUGAUACAUAGU  
||||| ||||| |||||  
GUGGGUAAACUA-GUAUAA 5'  
AT1G23850.1 1142 1159  
unknown protein

SRNA\_AG01\_SoLexa\_Mi2008\_1\_55587\_hit1

5' UUUGGAGUGAAAGGU-GAAGAU  
||||| ||||| |||||  
AAACCUACUUUCGAGCUUCUU 5'  
AT1G23850.1 317 338  
unknown protein

SRNA\_AG01\_SoLexa\_Mi2008\_1\_43578\_hit1

5' UGGUGGUGGUGAUGAUGUGUC  
||||| ||||| |||||  
ACCACCACCACUUCU-C-CAG 5'  
AT1G23850.1 488 506  
unknown protein

SRNA\_AG01\_SoLexa\_Mi2008\_1\_3079\_hit472

5' AUGAUGAUGAUGAUGAUGAUGA  
||||| ||||| |||||  
UACUACUAAUACUACAACUACC 5'  
AT1G24575.1 89 110  
unknown protein

SRNA\_AG01\_SoLexa\_Mi2008\_1\_3079\_hit472

5' AUGAUGAUGAUGAUGAUGAUGA  
||||| ||||| |||||  
CACUACUACUAAUACUACAACU 5'  
AT1G24575.1 92 113  
unknown protein

SRNA\_AG01\_SoLexa\_Mi2008\_1\_45039\_hit3

5' UGUGAUGAUGAUGAUGAUGAUGA  
||||| ||||| |||||  
CCACUACUACUAAUACUACAACU 5'  
AT1G24575.1 92 114  
unknown protein

SRNA\_AG01\_SoLexa\_Mi2008\_1\_2280\_hit1

5' AGUGGAUGAUGAUGAUGAUGAUG  
||| ||||| |||||  
GCAC-UACUACUAAUACUAC 5'  
AT1G24575.1 97 115  
unknown protein

SRNA\_AG01\_SoLexa\_Mi2008\_2\_45177\_hit1

5' UGUGCGGCCGUCGUGGUGGU  
||||| ||||| |||||  
ACACGCCGGCAGCGACCACCA 5'  
AT1G26770.2 712 732  
Expansin (AtEXPA10)

stems\_1sup\_AG01\_SoLexa\_Mi\_Cell\_2008\_hit\_target\_site.txt

SRNA\_AG01\_SoLexa\_Mi2008\_2\_45177\_hit1

5' UGUGCGGCCGUCGCUGGUGGU  
 |||  
 ACACGCCGGCAGCGACCACCA 5'  
 AT1G26770.1 752 772  
 Expansin (AtEXPA10)

SRNA\_AG01\_SoLexa\_Mi2008\_1\_43831\_hit1

5' UGGUUGUGGCUC-UGGUGGUA  
 ||| ||| | |||  
 ACCACCACCG-GCACCACCAU 5'  
 AT1G28290.2 158 178  
 proline-rich protein, putative

SRNA\_AG01\_SoLexa\_Mi2008\_1\_35934\_hit2

5' UGAG-AGUGAUGUGGGUGGUGGU  
 ||| | | |||  
 ACUCCUCCC-ACACCACCACCA 5'  
 AT1G28290.2 172 193  
 proline-rich protein, putative

SRNA\_AG01\_SoLexa\_Mi2008\_1\_43831\_hit1

5' UGGUUGUGGCUC-UGGUGGUA  
 ||| ||| | |||  
 ACCACCACCG-GCACCACCAU 5'  
 AT1G28290.1 276 296  
 proline-rich protein, putative

SRNA\_AG01\_SoLexa\_Mi2008\_1\_35934\_hit2

5' UGAG-AGUGAUGUGGGUGGUGGU  
 ||| | | |||  
 ACUCCUCCC-ACACCACCACCA 5'  
 AT1G28290.1 290 311  
 proline-rich protein, putative

SRNA\_AG01\_SoLexa\_Mi2008\_1\_43744\_hit2

5' UGGUUAGAGGGUAAAUUGGUC  
 ||| | |||:|||  
 ACCAACCUCCAUUUGACCAC 5'  
 AT1G28290.2 396 416  
 proline-rich protein, putative

SRNA\_AG01\_SoLexa\_Mi2008\_1\_43744\_hit2

5' UGGUUAGAGGGUAAAUUGGUC  
 ||| | |||:|||  
 ACCAACCUCCAUUUGACCAC 5'  
 AT1G28290.2 456 476  
 proline-rich protein, putative

SRNA\_AG01\_SoLexa\_Mi2008\_1\_43744\_hit2

5' UGGUUAGAGGGUAAAUUGGUC  
 ||| | |||:|||  
 ACCAACCUCCAUUUGACCAC 5'  
 AT1G28290.1 514 534  
 proline-rich protein, putative

SRNA\_AG01\_SoLexa\_Mi2008\_1\_43744\_hit2

5' UGGUUAGAGGGUAAAUUGGUC  
 ||| | |||:|||  
 ACCAACCUCCAUUUGACCAC 5'  
 AT1G28290.1 574 594  
 proline-rich protein, putative

stems\_1sup\_AG01\_SoIexa\_Mi\_Cell\_2008\_hit\_target\_site.txt

SRNA\_AG01\_SoIexa\_Mi2008\_1\_43744\_hit2

5' UGGUUAGAGGGUAAAUUGGUC  
||||| |||||:||||  
ACCAACCUCCAUUUGACCAC 5'

AT1G28290.1 634 654  
proline-rich protein, putative

SRNA\_AG01\_SoIexa\_Mi2008\_1\_12727\_hit1

5' CUUGAACCUUGGA-AGAAAAC  
||||| |||||  
UAACUUGGAACCUGACUUUUG 5'

AT1G30400.1 1603 1623  
AtMRP1

SRNA\_AG01\_SoIexa\_Mi2008\_1\_12727\_hit1

5' CUUGAACCUUGGA-AGAAAAC  
||||| |||||  
UAACUUGGAACCUGACUUUUG 5'

AT1G30400.2 1673 1693  
AtMRP1

SRNA\_AG01\_SoIexa\_Mi2008\_2\_37709\_hit1

5' UGCAAAUGAUUGUUGGUUCGA  
|||| ||| |||||  
ACGUAUACGAACAACCAAGCG 5'

AT1G30400.1 3599 3619  
AtMRP1

SRNA\_AG01\_SoIexa\_Mi2008\_1\_3121\_hit1

5' AUGCAAAUGAUUGUUGGUU  
|||| ||| |||||  
UACGUAUACGAACAACCAA 5'

AT1G30400.1 3602 3620  
AtMRP1

SRNA\_AG01\_SoIexa\_Mi2008\_2\_37709\_hit1

5' UGCAAAUGAUUGUUGGUUCGA  
|||| ||| |||||  
ACGUAUACGAACAACCAAGCG 5'

AT1G30400.2 3669 3689  
AtMRP1

SRNA\_AG01\_SoIexa\_Mi2008\_1\_3121\_hit1

5' AUGCAAAUGAUUGUUGGUU  
|||| ||| |||||  
UACGUAUACGAACAACCAA 5'

AT1G30400.2 3672 3690  
AtMRP1

SRNA\_AG01\_SoIexa\_Mi2008\_1\_6844\_hit1

5' CAUACAACGCCACAUAGGGAG  
|||| ||||| |||||  
GUAU-UUGCGGAGUAUCCUC 5'

AT1G30400.1 427 446  
AtMRP1

SRNA\_AG01\_SoIexa\_Mi2008\_1\_6844\_hit1

5' CAUACAACGCCACAUAGGGAG  
|||| ||||| |||||  
GUAU-UUGCGGAGUAUCCUC 5'

AT1G30400.2 497 516  
AtMRP1

stems\_1sup\_AG01\_SoLexa\_Mi\_Cell\_2008\_hit\_target\_site.txt

SRNA\_AG01\_SoLexa\_Mi2008\_1\_40743\_hit3

5' UGGAGUUGCUCAGAAAGAUGG  
|||  
ACCUCAACGAGACUCUCUACG 5'  
AT1G30490.1 1711 1731  
HD-Zip protein

SRNA\_AG01\_SoLexa\_Mi2008\_11\_7246\_hit3

5' CAUGGAGUUGCUCAGAAAGAU  
|||  
AUACCUCAACGAGACUCUCUA 5'  
AT1G30490.1 1713 1733  
HD-Zip protein

SRNA\_AG01\_SoLexa\_Mi2008\_1\_9282\_hit3

5' CGGUUUUUUCGGGU-UUUUUC  
| |||  
GACAAAAAA-CCCAAAAAAAG 5'  
AT1G30490.1 17 36  
HD-Zip protein

SRNA\_AG01\_SoLexa\_Mi2008\_1\_39355\_hit2

5' UGCUGAUGUG-UGGGCUUUUUGG  
|||  
ACGACUACACAACCC-AAAACG 5'  
AT1G30490.1 664 684  
HD-Zip protein

SRNA\_AG01\_SoLexa\_Mi2008\_2\_8957\_hit1

5' CGGACCAGGCUUCAUCCCCC  
|||  
GCCUGGUCCGAAGUAGGGUUA 5'  
AT1G30490.1 793 813  
HD-Zip protein

SRNA\_AG01\_SoLexa\_Mi2008\_153\_14822\_hit2

5' GGACCAGGCUUCAUCCCCC  
|||  
CCUGGUCCGAAGUAGGGUU 5'  
AT1G30490.1 794 812  
HD-Zip protein

SRNA\_AG01\_SoLexa\_Mi2008\_219\_8956\_hit2

5' CGGACCAGGCUUCAUCCCCC  
|||  
GCCUGGUCCGAAGUAGGGUU 5'  
AT1G30490.1 794 813  
HD-Zip protein

SRNA\_AG01\_SoLexa\_Mi2008\_1063\_31727\_hit2

5' UCGGACCAGGCUUCAUCCCCC  
: |||  
GGCCUGGUCCGAAGUAGGGUU 5'  
AT1G30490.1 794 814  
HD-Zip protein

SRNA\_AG01\_SoLexa\_Mi2008\_4\_8955\_hit2

5' CGGACCAGGCUUCAUCCCCC  
|||  
GCCUGGUCCGAAGUAGGGUU 5'  
AT1G30490.1 795 813  
HD-Zip protein

stems\_1sup\_AG01\_SoLexa\_Mi\_Cell\_2008\_hit\_target\_site.txt

SRNA\_AG01\_SoLexa\_Mi2008\_8\_8960\_hit4

```
5' CGGACCAGGCUUCAUCCCC
   |||
   GCCUGGUCCGAAGU-AGGGUU 5'
AT1G30490.1 795 814
HD-Zip protein
```

SRNA\_AG01\_SoLexa\_Mi2008\_47\_31726\_hit2

```
5' UCGGACCAGGCUUCAUCCCC
   :|||
   GGCCUGGUCCGAAGUAGGGU 5'
AT1G30490.1 795 814
HD-Zip protein
```

SRNA\_AG01\_SoLexa\_Mi2008\_310\_14823\_hit7

```
5' GGACCAGGCUUCAUCCCC
   |||
   CCUGGUCCGAAGU-AGGGU 5'
AT1G30490.1 796 813
HD-Zip protein
```

SRNA\_AG01\_SoLexa\_Mi2008\_641\_8959\_hit7

```
5' CGGACCAGGCUUCAUCCCC
   |||
   GCCUGGUCCGAAGU-AGGGU 5'
AT1G30490.1 796 814
HD-Zip protein
```

SRNA\_AG01\_SoLexa\_Mi2008\_2\_31725\_hit2

```
5' UCGGACCAGGCUUCAUCCC
   :|||
   GGCCUGGUCCGAAGUAGGG 5'
AT1G30490.1 796 814
HD-Zip protein
```

SRNA\_AG01\_SoLexa\_Mi2008\_4138\_31731\_hit7

```
5' UCGGACCAGGCUUCAUCCCC
   |||
   CGCCUGGUCCGAAGU-AGGGU 5'
AT1G30490.1 796 815
HD-Zip protein
```

SRNA\_AG01\_SoLexa\_Mi2008\_1\_8958\_hit7

```
5' CGGACCAGGCUUCAUCCC
   |||
   GCCUGGUCCGAAGU-AGGG 5'
AT1G30490.1 797 814
HD-Zip protein
```

SRNA\_AG01\_SoLexa\_Mi2008\_15\_11085\_hit1

```
5' CUCGGACCAGGCUUCAUCC
   :|||
   AGGCCUGGUCCGAAGUAGG 5'
AT1G30490.1 797 815
HD-Zip protein
```

SRNA\_AG01\_SoLexa\_Mi2008\_98\_31730\_hit7

```
5' UCGGACCAGGCUUCAUCCC
   |||
   CGCCUGGUCCGAAGU-AGGG 5'
AT1G30490.1 797 815
HD-Zip protein
```

stems\_1sup\_AG01\_SoLexa\_Mi\_Cell\_2008\_hit\_target\_site.txt

SRNA\_AG01\_SoLexa\_Mi2008\_1\_11087\_hit3

5' CUCGGACCAGGCUUCAUCC  
 |||  
 UGCCUGGUCCGAAGU-AGGG 5'  
 AT1G30490.1 797 816  
 HD-Zip protein

SRNA\_AG01\_SoLexa\_Mi2008\_33\_15725\_hit3

5' GUCGGACCAGGCUUCAUCC  
 : |||  
 UGCCUGGUCCGAAGU-AGGG 5'  
 AT1G30490.1 797 816  
 HD-Zip protein

SRNA\_AG01\_SoLexa\_Mi2008\_68\_49390\_hit1

5' UUCGGACCAGGCUUCAUCC  
 |||  
 UGCCUGGUCCGAAGU-AGGG 5'  
 AT1G30490.1 797 816  
 HD-Zip protein

SRNA\_AG01\_SoLexa\_Mi2008\_6\_31729\_hit7

5' UCGGACCAGGCUUCAUCC  
 |||  
 CGCCUGGUCCGAAGU-AGG 5'  
 AT1G30490.1 798 815  
 HD-Zip protein

SRNA\_AG01\_SoLexa\_Mi2008\_1\_49389\_hit1

5' UUCGGACCAGGCUUCAUCC  
 |||  
 UGCCUGGUCCGAAGU-AGG 5'  
 AT1G30490.1 798 816  
 HD-Zip protein

SRNA\_AG01\_SoLexa\_Mi2008\_3\_40720\_hit1

5' UGGAGUGGGACGGCGAGAUCAU  
 |||:||| ||| |||  
 ACCUCACCUUGCCUCUCU-GUA 5'  
 AT1G33270.2 224 244  
 unknown protein

SRNA\_AG01\_SoLexa\_Mi2008\_3\_17114\_hit1

5' UAA-AUU-GUUGUAUGGAGAA  
 ||| ||| ||| ||| |||  
 AUUAUAAACAACUUACCUCUU 5'  
 AT1G33560.1 1269 1289  
 ADR1 (activated disease resistance)

SRNA\_AG01\_SoLexa\_Mi2008\_73\_9994\_hit1

5' CUACUAGAGCGAACGAGCA  
 ||| ||| ||| ||| |||  
 GAUGAUCUCGUCG-UCGA 5'  
 AT1G33560.1 377 394  
 ADR1 (activated disease resistance)

SRNA\_AG01\_SoLexa\_Mi2008\_1\_28030\_hit4

5' UCAGAAGAAGCCAC-GUCAGAUGA  
 ||| ||| ||| ||| |||  
 AGUCUUCUUCU-UGGCAGUCUACU 5'  
 AT1G35210.1 259 281  
 unknown protein

stems\_1sup\_AG01\_SoLexa\_Mi\_Cell\_2008\_hit\_target\_site.txt

SRNA\_AG01\_SoLexa\_Mi2008\_1\_919\_hit1

5' AAGGCUAAUGUUGUGAUCUUC  
 |||| | |||||  
 GUCCG-U-ACAACACUAGAAG 5'  
 AT1G35310.1 137 155  
 unknown protein

SRNA\_AG01\_SoLexa\_Mi2008\_1\_14083\_hit2

5' GAGGCCAAUGUUGUGAUCUA  
 |||| | |||||  
 CUCCG-U-ACAACACUAGAA 5'  
 AT1G35310.1 138 155  
 unknown protein

SRNA\_AG01\_SoLexa\_Mi2008\_1\_52302\_hit3

5' UUGGCAGGGUCAUCCUUGGAG  
 ||| ||||:|||||  
 AAC-GUCCUAGUAGGAACCUC 5'  
 AT1G35550.1 162 181  
 elongation factor, putative

SRNA\_AG01\_SoLexa\_Mi2008\_1\_26497\_hit1

5' UAUUUGUGA-GAGUUCGUGAAA  
 | ||| ||| |||||  
 AGAAA-ACUACUCAAGCACUUU 5'  
 AT1G35710.1 129 149  
 protein kinase, putative

SRNA\_AG01\_SoLexa\_Mi2008\_1\_19304\_hit2

5' UACACGUUCAUCGGAAUUGCU  
 |||||  
 AUGUGCAAGUAGCCUUUACGA 5'  
 AT1G35710.1 3219 3239  
 protein kinase, putative

SRNA\_AG01\_SoLexa\_Mi2008\_2\_5215\_hit1

5' CAAUUAG-UGGAGAAGUUA  
 |||| | |||||  
 AUUAA-CUACCUCUUAAGU 5'  
 AT1G35710.1 3368 3386  
 protein kinase, putative

SRNA\_AG01\_SoLexa\_Mi2008\_10\_17146\_hit1

5' UAACAACAACAAC-AAAGGUGAA  
 ||||| |||||  
 AUUGUUGUUGUUGUUUCGACUU 5'  
 AT1G35710.1 3487 3509  
 protein kinase, putative

SRNA\_AG01\_SoLexa\_Mi2008\_1\_28845\_hit2

5' UCAUCACUAGGAAGCGUUGGA  
 |||| ||:|||||  
 AGUAAUGGUCCUUCGCAACCU 5'  
 AT1G37130.1 1592 1612  
 nitrate reductase (At1g37130)

SRNA\_AG01\_SoLexa\_Mi2008\_2\_44202\_hit1

5' UGUAGGACGAAUGCUUUGGUA  
 |||||  
 ACAUCCUGCUUACGAAACCAU 5'  
 AT1G48410.1 1250 1270  
 Argonaute protein (AGO1)

stems\_1sup\_AG01\_SoLexa\_Mi\_Cell\_2008\_hit\_target\_site.txt

SRNA\_AG01\_SoLexa\_Mi2008\_2\_44202\_hit1

5' UGUAGGACGAAUGCUUUGGUA  
|||||  
ACAUCCUGCUUACGAAACCAU 5'  
AT1G48410.2 1256 1276  
Argonaute protein (AG01)

SRNA\_AG01\_SoLexa\_Mi2008\_13\_6596\_hit1

5' CAGGUAACCUUCAGCAAAGCA  
|||||  
GUCCAUUGGAAGUCGUUUCGU 5'  
AT1G48410.1 1711 1731  
Argonaute protein (AG01)

SRNA\_AG01\_SoLexa\_Mi2008\_13\_6596\_hit1

5' CAGGUAACCUUCAGCAAAGCA  
|||||  
GUCCAUUGGAAGUCGUUUCGU 5'  
AT1G48410.2 1717 1737  
Argonaute protein (AG01)

SRNA\_AG01\_SoLexa\_Mi2008\_16\_26870\_hit1

5' UCAACAGAAGCCAGAGAAGUA  
|||||  
AGUUGUCUUCGGUCUCUUCAU 5'  
AT1G48410.1 1831 1851  
Argonaute protein (AG01)

SRNA\_AG01\_SoLexa\_Mi2008\_16\_26870\_hit1

5' UCAACAGAAGCCAGAGAAGUA  
|||||  
AGUUGUCUUCGGUCUCUUCAU 5'  
AT1G48410.2 1837 1857  
Argonaute protein (AG01)

SRNA\_AG01\_SoLexa\_Mi2008\_3\_40523\_hit1

5' UGGAGGAGGCAGUAUACGAGC  
|||||  
ACCUCCUCCGUCAUAUGCUCG 5'  
AT1G48410.1 1853 1873  
Argonaute protein (AG01)

SRNA\_AG01\_SoLexa\_Mi2008\_3\_40523\_hit1

5' UGGAGGAGGCAGUAUACGAGC  
|||||  
ACCUCCUCCGUCAUAUGCUCG 5'  
AT1G48410.2 1859 1879  
Argonaute protein (AG01)

SRNA\_AG01\_SoLexa\_Mi2008\_2\_28543\_hit1

5' UCAGGGCGAGCACUGACUGGU  
|||||  
AGUCCCGCUCGUGACUGACCA 5'  
AT1G48410.1 2098 2118  
Argonaute protein (AG01)

SRNA\_AG01\_SoLexa\_Mi2008\_2\_28543\_hit1

5' UCAGGGCGAGCACUGACUGGU  
|||||  
AGUCCCGCUCGUGACUGACCA 5'  
AT1G48410.2 2104 2124  
Argonaute protein (AG01)

stems\_1sup\_AG01\_SoLexa\_Mi\_Cell\_2008\_hit\_target\_site.txt

SRNA\_AG01\_SoLexa\_Mi2008\_2\_36850\_hit22

5' UGAGUGUGGUCCUCCUCUCC  
||| | |||||  
ACUC-CUCCAGGAGGAGAAGG 5'  
AT1G48410.2 417 436  
Argonaute protein (AG01)

SRNA\_AG01\_SoLexa\_Mi2008\_1\_55475\_hit2

5' UUUG-CUC-GCGGUGGUCCAGAC  
||| | |||||  
AAACAGAGACGCCACCAGGUCUU 5'  
AT1G48410.2 485 507  
Argonaute protein (AG01)

SRNA\_AG01\_SoLexa\_Mi2008\_46\_8918\_hit2

5' CGCUUGGUGCAGGUCGGGAAC  
|||:| | |||||  
UCGAACUACGUCGAGCCCUUG 5'  
AT1G48410.2 509 529  
Argonaute protein (AG01)

SRNA\_AG01\_SoLexa\_Mi2008\_280\_14793\_hit2

5' GCUUGGUGCAGGUCGGGAA  
|||:| | |||||  
CGAACUACGUCGAGCCCUU 5'  
AT1G48410.2 510 528  
Argonaute protein (AG01)

SRNA\_AG01\_SoLexa\_Mi2008\_1\_39168\_hit1

5' UGCUAGAAGAAGGUUAGGCU  
||| | |||||  
ACGAUCUUCUCCAUAUCCGA 5'  
AT1G48410.2 669 689  
Argonaute protein (AG01)

SRNA\_AG01\_SoLexa\_Mi2008\_5\_6229\_hit1

5' CAGCAAAGAAUGGUUAGCC  
||| | |||||  
GUCGUUUCUUUACCAAUCGG 5'  
AT1G48410.2 751 770  
Argonaute protein (AG01)

SRNA\_AG01\_SoLexa\_Mi2008\_1\_28240\_hit1

5' UCAGCAAAGAAUGGUUAGCC  
||| | |||||  
AGUCGUUUCUUUACCAAUCGG 5'  
AT1G48410.2 751 771  
Argonaute protein (AG01)

SRNA\_AG01\_SoLexa\_Mi2008\_1\_140\_hit1

5' AA-AAAUGGGCCAGAACUUGA  
|| | | |: |||||  
UUGUUU-CUCGGUCUUGAACU 5'  
AT1G48760.3 1762 1781  
putative protein

SRNA\_AG01\_SoLexa\_Mi2008\_1\_37249\_hit1

5' UGAUGAUUGAUG-UUGGAUGAG  
||| | |||||  
ACUACUAACUACUAA-CUACUA 5'  
AT1G48760.3 2973 2993  
putative protein

stems\_1sup\_AG01\_SoLexa\_Mi\_Cell\_2008\_hit\_target\_site.txt

SRNA\_AG01\_SoLexa\_Mi2008\_1\_51445\_hit1

5' UUGCAUGAU-GAUGAUUGAUGU  
 ||| ||||| |||||  
 AAC-UACUAACUACUACUACU 5'  
 AT1G48760.3 2974 2994  
 putative protein

SRNA\_AG01\_SoLexa\_Mi2008\_1\_37249\_hit1

5' UGAUGAUUGAUG-UUGGAUGAG  
 ||||| ||||| |||||  
 ACUACUAACUACUAA-CUACUA 5'  
 AT1G48760.3 2980 3000  
 putative protein

SRNA\_AG01\_SoLexa\_Mi2008\_1\_7745\_hit1

5' CCAGAAGCAUAACCGGUGGUC  
 ||||| ||||| |||||  
 UGUCUUCGUUUUGGCU-CCAG 5'  
 AT1G48760.3 459 478  
 putative protein

SRNA\_AG01\_SoLexa\_Mi2008\_15\_14868\_hit2

5' GGAGGAGGACAUGGCGGAGG  
 ||||| ||||| |||||  
 CCUCCUCCCGUACCUCCUCC 5'  
 AT1G49750.1 220 239  
 unknown protein

SRNA\_AG01\_SoLexa\_Mi2008\_3\_3203\_hit1

5' AUGCUUUCGGAAAUUAGGACU  
 ||||| ||||| |||||  
 UACGAAAGCCCUUAA-CCUGG 5'  
 AT1G49750.1 938 957  
 unknown protein

SRNA\_AG01\_SoLexa\_Mi2008\_2\_4537\_hit1

5' CAAGAAAAGAGA-AUAAUG  
 ||||| ||||| |||||  
 GUUCUUUUUCUCUAUUAUUGU 5'  
 AT1G50360.1 169 188  
 myosin, putative

SRNA\_AG01\_SoLexa\_Mi2008\_2\_13419\_hit2

5' GAAGAAGAAGAAG-ACACUU  
 ||||| ||||| |||||  
 CUUCUUCUUCUACGU-UGAA 5'  
 AT1G50360.1 61 79  
 myosin, putative

SRNA\_AG01\_SoLexa\_Mi2008\_1\_53557\_hit1

5' UUGUGAGUAAUA--GUGUAUGUGA  
 ||||| ||||| |||||  
 AACACUCAUUAUCGCACACACA 5'  
 AT1G50420.1 -1 22  
 scarecrow 3 -like protein

SRNA\_AG01\_SoLexa\_Mi2008\_1\_12127\_hit1

5' CUGGUGGUUAUCUUGUGAGUA  
 ||||| ||||| |||||  
 GACCACCAAUAGAACACUCAU 5'  
 AT1G50420.1 13 33  
 scarecrow 3 -like protein

stems\_1sup\_AG01\_SoIexa\_Mi\_Cell\_2008\_hit\_target\_site.txt

sRNA\_AG01\_SoIexa\_Mi2008\_1\_14022\_hit2

5' GAGCUCU-UUC-UUGAUUCUA  
| ||||| ||| |||||  
CCCAGAGAAGGAACUAAGAU 5'  
AT1G50420.1 1613 1633  
scarecrow 3 -like protein

sRNA\_AG01\_SoIexa\_Mi2008\_7\_5017\_hit1

5' CAAGUCUGGGAAACAGUUUC  
||| || ||| |||||  
GUU-ACAACC-UUUGUCAAG 5'  
AT1G52000.1 888 906  
null

sRNA\_AG01\_SoIexa\_Mi2008\_1\_5010\_hit1

5' CAAGUGCAUUAAGAACAUCAU  
|||| |||| |||||:  
GUUCUCGUUUUUUUGUAGUG 5'  
AT1G52030.1 1580 1600  
unknown protein

sRNA\_AG01\_SoIexa\_Mi2008\_2\_9562\_hit1

5' CUAAC-AAACGCUACACCGUCGU  
|||| ||| |||||:||||  
GAUUGCUUU-CGAUGUGGUAGCA 5'  
AT1G52030.1 1749 1770  
unknown protein

sRNA\_AG01\_SoIexa\_Mi2008\_1\_5010\_hit1

5' CAAGUGCAUUAAGAACAUCAU  
|||| |||| |||||:  
GUUCUCGUUUUUUUGUAGUG 5'  
AT1G52030.2 1779 1799  
unknown protein

sRNA\_AG01\_SoIexa\_Mi2008\_2\_9562\_hit1

5' CUAAC-AAACGCUACACCGUCGU  
|||| ||| |||||:||||  
GAUUGCUUU-CGAUGUGGUAGCA 5'  
AT1G52030.2 1948 1969  
unknown protein

sRNA\_AG01\_SoIexa\_Mi2008\_5\_14577\_hit1

5' GCC-GAGAGAUGGAAACGUU  
|| ||:|||||||  
AGGACUUUCUACCUUUGCAA 5'  
AT1G52030.2 340 359  
unknown protein

sRNA\_AG01\_SoIexa\_Mi2008\_2\_4629\_hit1

5' CAAGAGCAUCACCAGUAAG  
|||||| ||||| ||  
GUUCUCGAAGUGGUC-UUG 5'  
AT1G52030.1 597 614  
unknown protein

sRNA\_AG01\_SoIexa\_Mi2008\_2\_4629\_hit1

5' CAAGAGCAUCACCAGUAAG  
|||||| ||||| ||  
GUUCUCGAAGUGGUC-UUG 5'  
AT1G52030.2 796 813  
unknown protein

stems\_1sup\_AG01\_SoLexa\_Mi\_Cell\_2008\_hit\_target\_site.txt

SRNA\_AG01\_SoLexa\_Mi2008\_1\_34289\_hit2

5' UGAAAUCGAUGUUGU-AAGUCC  
 :||||| || |||||  
 GCUUUAGCUACAUCAUUUCAGG 5'  
 AT1G52400.2 1567 1588  
 beta-glucosidase, putative

SRNA\_AG01\_SoLexa\_Mi2008\_1\_7741\_hit1

5' CCAGAAAUUUUACGUGUU  
 || |||| | ||||| :  
 GG-CUUUAGAAAUGCACAG 5'  
 AT1G52410.1 1804 1821  
 myosin-like protein

SRNA\_AG01\_SoLexa\_Mi2008\_1\_7741\_hit1

5' CCAGAAAUUUUACGUGUU  
 || |||| | ||||| :  
 GG-CUUUAGAAAUGCACAG 5'  
 AT1G52410.2 1816 1833  
 myosin-like protein

SRNA\_AG01\_SoLexa\_Mi2008\_1\_24174\_hit1

5' UAGUUUUCUGAGAUC AUGUAUA  
 :||||| |||||  
 GUCAAAAGACUCUAGU-CAUAC 5'  
 AT1G52420.1 2456 2476  
 glycosyl transferase, putative

SRNA\_AG01\_SoLexa\_Mi2008\_5\_13886\_hit2

5' GACUUGAGAGGUGUAGGAUA  
 ||||| | :|||  
 CUGAACUCUCCAC-UUCUAU 5'  
 AT1G53070.1 80 98  
 protein kinase, putative

SRNA\_AG01\_SoLexa\_Mi2008\_13\_35730\_hit2

5' UGACUUGAGAGGUGUAGGAUA  
 ||||| | :|||  
 ACUGAACUCUCCAC-UUCUAU 5'  
 AT1G53070.1 80 99  
 protein kinase, putative

SRNA\_AG01\_SoLexa\_Mi2008\_5\_35729\_hit2

5' UGACUUGAGAGGUGUAGGAU  
 ||||| | :|||  
 ACUGAACUCUCCAC-UUCUA 5'  
 AT1G53070.1 81 99  
 protein kinase, putative

SRNA\_AG01\_SoLexa\_Mi2008\_1\_37308\_hit1

5' UGAUGGAGAAGAUC AAACCUAA  
 ||||| || ||||| ||  
 ACUACCACUCCUAGUUUGG-UU 5'  
 AT1G53230.1 1226 1246  
 flower development cycloidea like protein

SRNA\_AG01\_SoLexa\_Mi2008\_6\_14255\_hit369

5' GAUGAUGAUGAUGAUGAUGAU  
 ||||| ||||| ||| |||  
 CUACUACUACUACUACCACUCCUA 5'  
 AT1G53230.1 1233 1256  
 flower development cycloidea like protein

stems\_1sup\_AG01\_SoLexa\_Mi\_Cell\_2008\_hit\_target\_site.txt

SRNA\_AG01\_SoLexa\_Mi2008\_6\_14255\_hit369

5' GAUGAUGAUGAUGAUGAUGAUGAU  
|||||  
CUACUACUACUACUACUACCACUC 5'

AT1G53230.1 1236 1259  
flower development cycloidea like protein

SRNA\_AG01\_SoLexa\_Mi2008\_1\_36323\_hit13

5' UGAGGAUGAUGAUGAUGAUGAUGA  
||| |||||  
ACUACUACUACUACUACCACU 5'

AT1G53230.1 1237 1257  
flower development cycloidea like protein

SRNA\_AG01\_SoLexa\_Mi2008\_1\_3079\_hit472

5' AUGAUGAUGAUGAUGAUGAUGAUGA  
|||||  
UACUACUACUACUACUACCACU 5'

AT1G53230.1 1237 1258  
flower development cycloidea like protein

SRNA\_AG01\_SoLexa\_Mi2008\_1\_56092\_hit3

5' UUUG-UGAUGAUGAUGAUGAUGAUGA  
:||| |||||  
GAACUACUACUACUACUACCACU 5'

AT1G53230.1 1238 1260  
flower development cycloidea like protein

SRNA\_AG01\_SoLexa\_Mi2008\_1\_45039\_hit3

5' UG-UGAUGAUGAUGAUGAUGAUGAUGA  
|| |||||  
ACUACUACUACUACUACUACCACU 5'

AT1G53230.1 1238 1261  
flower development cycloidea like protein

SRNA\_AG01\_SoLexa\_Mi2008\_9\_14254\_hit8

5' GAUGAUGAUGAUGAUGAUGAUCUU  
||||| |  
CUACUACUACUACUACUACCA 5'

AT1G53230.1 1239 1259  
flower development cycloidea like protein

SRNA\_AG01\_SoLexa\_Mi2008\_7\_3078\_hit1

5' AUGAUGAUGA-GAAUGAUGAU  
||||| | ||||| |  
UACUACUACUAC-UACUACCA 5'

AT1G53230.1 1240 1259  
flower development cycloidea like protein

SRNA\_AG01\_SoLexa\_Mi2008\_1\_36323\_hit13

5' UGAGGAUGAUGAUGAUGAUGAUGA  
||| |||||  
ACUACUACUACUACUACUACC 5'

AT1G53230.1 1240 1260  
flower development cycloidea like protein

SRNA\_AG01\_SoLexa\_Mi2008\_1\_3079\_hit472

5' AUGAUGAUGAUGAUGAUGAUGAUGA  
|||||  
GACUACUACUACUACUACUACC 5'

AT1G53230.1 1240 1261  
flower development cycloidea like protein

stems\_1sup\_AG01\_SoLexa\_Mi\_Cell\_2008\_hit\_target\_site.txt

SRNA\_AG01\_SoLexa\_Mi2008\_1\_45039\_hit3

5' UG-UGAUGAUGAUGAUGAUGAUGA  
|| |||||  
ACGACUACUACUACUACUACC 5'  
AT1G53230.1 1241 1264  
flower development cycloidea like protein

SRNA\_AG01\_SoLexa\_Mi2008\_1\_38921\_hit1

5' UGCGGACGAUGAUGAUGAUGAU  
||| || |||||  
ACGACUACUACUACUACUACUA 5'  
AT1G53230.1 1242 1263  
flower development cycloidea like protein

SRNA\_AG01\_SoLexa\_Mi2008\_7\_3078\_hit1

5' AUGAUGAUGA-GAAUGAUGAU  
||| ||| |||||  
CACUACUACUACU-ACUACUA 5'  
AT1G53230.1 1243 1262  
flower development cycloidea like protein

SRNA\_AG01\_SoLexa\_Mi2008\_3\_39351\_hit1

5' UGCUGAUGAUGCUGAUG-UGAC  
||| ||||| |||  
ACGACUACUACUACUACUACUA 5'  
AT1G53230.1 1243 1264  
flower development cycloidea like protein

SRNA\_AG01\_SoLexa\_Mi2008\_6\_14255\_hit369

5' GA-UGAUGAUGAUGAUGAUGAUGAU  
|| || |||||  
CUGACGACUACUACUACUACUACUA 5'  
AT1G53230.1 1243 1267  
flower development cycloidea like protein

SRNA\_AG01\_SoLexa\_Mi2008\_1\_56092\_hit3

5' UUUG-UGAUGAUGAUGAUGAUGAUGA  
| || |||||  
ACACGACUACUACUACUACUACU 5'  
AT1G53230.1 1244 1266  
flower development cycloidea like protein

SRNA\_AG01\_SoLexa\_Mi2008\_1\_8179\_hit1

5' CCUGAUGAUGAUGCUGCAU  
||| ||||| || |||  
GGACUACUACUACUAC-UA 5'  
AT1G53230.1 1246 1263  
flower development cycloidea like protein

SRNA\_AG01\_SoLexa\_Mi2008\_2\_31619\_hit1

5' UCGCUGAUGAUGAUUGAUGAU  
||| ||||| |||||  
CUCGACUACUACUA-CUACUA 5'  
AT1G53230.1 1246 1265  
flower development cycloidea like protein

SRNA\_AG01\_SoLexa\_Mi2008\_1\_39699\_hit1

5' UGGAACUGAUGAUGAUGAUGAUGA  
||| ||| |||||  
ACCU-GACGACUACUACUACU 5'  
AT1G53230.1 1250 1269  
flower development cycloidea like protein

stems\_1sup\_AG01\_SoLexa\_Mi\_Cell\_2008\_hit\_target\_site.txt

SRNA\_AG01\_SoLexa\_Mi2008\_1\_28327\_hit1

5' UCAGCCGCAACCACCACUGUG  
|| |||||  
AG-CGGCGUUGGUGGUGG-CAA 5'

AT1G53230.1 372 391  
flower development cycloidea like protein

SRNA\_AG01\_SoLexa\_Mi2008\_1\_13897\_hit2

5' GAGAAAUCAAGUUUUUGGUGU  
||| ||||| ||||  
CUCUUUAAUUUCAAAA--CCAA 5'

AT1G53230.1 689 708  
flower development cycloidea like protein

SRNA\_AG01\_SoLexa\_Mi2008\_1\_46444\_hit1

5' UUAACUCUGUGAUUGUUU-GGU  
||| ||||| ||| ||:  
AAUUGAGACACUAAGAAAUCCG 5'

AT1G56010.1 1000 1021  
NAC1

SRNA\_AG01\_SoLexa\_Mi2008\_1\_46444\_hit1

5' UUAACUCUGUGAUUGUUU-GGU  
||| ||||| ||| ||:  
AAUUGAGACACUAAGAAAUCCG 5'

AT1G56010.2 1025 1046  
NAC1

SRNA\_AG01\_SoLexa\_Mi2008\_1\_13477\_hit1

5' GAAGCAGGGCACGUG--CAUU  
||| ||||| ||||  
CUUCGUCCCAUGCACGAGUAA 5'

AT1G56010.1 773 793  
NAC1

SRNA\_AG01\_SoLexa\_Mi2008\_2\_14844\_hit1

5' GGAGAAGCAGGGCACGUG--CAUU  
||| ||||| ||||  
CCUCUUCGUCCCAUGCACGAGUAA 5'

AT1G56010.1 773 796  
NAC1

SRNA\_AG01\_SoLexa\_Mi2008\_91\_40198\_hit1

5' UGGAGAAGCAGGGCACGUG--CAUU  
||| ||||| ||||  
ACCUCUUCGUCCCAUGCACGAGUAA 5'

AT1G56010.1 773 797  
NAC1

SRNA\_AG01\_SoLexa\_Mi2008\_2\_13910\_hit1

5' GAGAAGCAGGGCACGUGCAU  
||| ||||| :  
CUCUUCGUCCCAUGCACGAG 5'

AT1G56010.1 775 794  
NAC1

SRNA\_AG01\_SoLexa\_Mi2008\_1\_14842\_hit1

5' GGAGAAGCAGGGCACGUGCAA  
||| |||||  
CCUCUUCGUCCCAUGCACGAG 5'

AT1G56010.1 775 795  
NAC1

stems\_1sup\_AG01\_SoLexa\_Mi\_Cell\_2008\_hit\_target\_site.txt

SRNA\_AG01\_SoLexa\_Mi2008\_4\_14843\_hit1

5' GGAGAAGCAGGGCACGUGCAU  
 ||||| :  
 CCUCUUCGUCCCAUGCACGAG 5'  
 AT1G56010.1 775 795  
 NAC1

SRNA\_AG01\_SoLexa\_Mi2008\_1\_14846\_hit1

5' GGAGAAGCAGGGCACGUGCGA  
 ||||| :  
 CCUCUUCGUCCCAUGCACGAG 5'  
 AT1G56010.1 775 795  
 NAC1

SRNA\_AG01\_SoLexa\_Mi2008\_3\_40196\_hit1

5' UGGAGAAGCAGGGCACGUGCAA  
 ||||| :  
 ACCUCUUCGUCCCAUGCACGAG 5'  
 AT1G56010.1 775 796  
 NAC1

SRNA\_AG01\_SoLexa\_Mi2008\_284\_40197\_hit1

5' UGGAGAAGCAGGGCACGUGCAU  
 ||||| :  
 ACCUCUUCGUCCCAUGCACGAG 5'  
 AT1G56010.1 775 796  
 NAC1

SRNA\_AG01\_SoLexa\_Mi2008\_10440\_13909\_hit2

5' GAGAAGCAGGGCACGUGCA  
 ||||| :  
 CUCUUCGUCCCAUGCACGA 5'  
 AT1G56010.1 776 794  
 NAC1

SRNA\_AG01\_SoLexa\_Mi2008\_110\_13911\_hit1

5' GAGAAGCAGGGCACGUGCG  
 ||||| :  
 CUCUUCGUCCCAUGCACGA 5'  
 AT1G56010.1 776 794  
 NAC1

SRNA\_AG01\_SoLexa\_Mi2008\_41322\_14841\_hit2

5' GGAGAAGCAGGGCACGUGCA  
 ||||| :  
 CCUCUUCGUCCCAUGCACGA 5'  
 AT1G56010.1 776 795  
 NAC1

SRNA\_AG01\_SoLexa\_Mi2008\_422\_14845\_hit1

5' GGAGAAGCAGGGCACGUGCG  
 ||||| :  
 CCUCUUCGUCCCAUGCACGA 5'  
 AT1G56010.1 776 795  
 NAC1

SRNA\_AG01\_SoLexa\_Mi2008\_370931\_40195\_hit2

5' UGGAGAAGCAGGGCACGUGCA  
 ||||| :  
 ACCUCUUCGUCCCAUGCACGA 5'  
 AT1G56010.1 776 796  
 NAC1

stems\_1sup\_AG01\_SoIexa\_Mi\_Cell\_2008\_hit\_target\_site.txt

SRNA\_AG01\_SoIexa\_Mi2008\_7589\_40199\_hit1

```
5' UGGAGAAGCAGGGCACGUGCG
   |||
   ACCUCUUCGUCCCAUGCACGA 5'
AT1G56010.1    776    796
NAC1
```

SRNA\_AG01\_SoIexa\_Mi2008\_2\_40202\_hit1

```
5' UGGAGAAGCAGGGUACGUGCU
   |||
   ACCUCUUCGUCCCAUGCACGA 5'
AT1G56010.1    776    796
NAC1
```

SRNA\_AG01\_SoIexa\_Mi2008\_1214\_3232\_hit1

```
5' AUGGAGAAGCAGGGCACGUGCA
   |||
   AACCUCUUCGUCCCAUGCACGA 5'
AT1G56010.1    776    797
NAC1
```

SRNA\_AG01\_SoIexa\_Mi2008\_24\_3233\_hit1

```
5' AUGGAGAAGCAGGGCACGUGCG
   |||
   AACCUCUUCGUCCCAUGCACGA 5'
AT1G56010.1    776    797
NAC1
```

SRNA\_AG01\_SoIexa\_Mi2008\_9\_52081\_hit1

```
5' UUGGAGAAGCAGGGCACGUGCA
   |||
   AACCUCUUCGUCCCAUGCACGA 5'
AT1G56010.1    776    797
NAC1
```

SRNA\_AG01\_SoIexa\_Mi2008\_23\_14840\_hit3

```
5' GGAGAAGCAGGGCACGUGC
   |||
   CCUCUUCGUCCCAUGCACG 5'
AT1G56010.1    777    795
NAC1
```

SRNA\_AG01\_SoIexa\_Mi2008\_1\_40190\_hit1

```
5' UGGAGAAGCAGGGCACGUAA
   |||
   ACCUCUUCGUCCCAUGCACG 5'
AT1G56010.1    777    796
NAC1
```

SRNA\_AG01\_SoIexa\_Mi2008\_404\_40194\_hit3

```
5' UGGAGAAGCAGGGCACGUGC
   |||
   ACCUCUUCGUCCCAUGCACG 5'
AT1G56010.1    777    796
NAC1
```

SRNA\_AG01\_SoIexa\_Mi2008\_2\_40201\_hit1

```
5' UGGAGAAGCAGGGUACGUGC
   |||
   ACCUCUUCGUCCCAUGCACG 5'
AT1G56010.1    777    796
NAC1
```

stems\_1sup\_AG01\_SoLexa\_Mi\_Cell\_2008\_hit\_target\_site.txt

SRNA\_AG01\_SoLexa\_Mi2008\_9\_40189\_hit2

5' UGGAGAAGCAGGGCACGUA  
 |||  
 ACCUCUUCGUCCCAUGCAC 5'  
 AT1G56010.1 778 796  
 NAC1

SRNA\_AG01\_SoLexa\_Mi2008\_366\_40193\_hit3

5' UGGAGAAGCAGGGCACGUG  
 |||  
 ACCUCUUCGUCCCAUGCAC 5'  
 AT1G56010.1 778 796  
 NAC1

SRNA\_AG01\_SoLexa\_Mi2008\_1\_40200\_hit1

5' UGGAGAAGCAGGGUACGUG  
 |||  
 ACCUCUUCGUCCCAUGCAC 5'  
 AT1G56010.1 778 796  
 NAC1

SRNA\_AG01\_SoLexa\_Mi2008\_2\_3231\_hit2

5' AUGGAGAAGCAGGGCACGUG  
 |||  
 AACCUCUUCGUCCCAUGCAC 5'  
 AT1G56010.1 778 797  
 NAC1

SRNA\_AG01\_SoLexa\_Mi2008\_1\_13477\_hit1

5' GAAGCAGGGCACGUG--CAUU  
 |||  
 CUUCGUCCCAUGCACGAGUAA 5'  
 AT1G56010.2 798 818  
 NAC1

SRNA\_AG01\_SoLexa\_Mi2008\_2\_14844\_hit1

5' GGAGAAGCAGGGCACGUG--CAUU  
 |||  
 CCUCUUCGUCCCAUGCACGAGUAA 5'  
 AT1G56010.2 798 821  
 NAC1

SRNA\_AG01\_SoLexa\_Mi2008\_91\_40198\_hit1

5' UGGAGAAGCAGGGCACGUG--CAUU  
 |||  
 ACCUCUUCGUCCCAUGCACGAGUAA 5'  
 AT1G56010.2 798 822  
 NAC1

SRNA\_AG01\_SoLexa\_Mi2008\_2\_13910\_hit1

5' GAGAAGCAGGGCACGUGCAU  
 ||| :  
 CUCUUCGUCCCAUGCACGAG 5'  
 AT1G56010.2 800 819  
 NAC1

SRNA\_AG01\_SoLexa\_Mi2008\_1\_14842\_hit1

5' GGAGAAGCAGGGCACGUGCAA  
 |||  
 CCUCUUCGUCCCAUGCACGAG 5'  
 AT1G56010.2 800 820  
 NAC1

stems\_1sup\_AG01\_SoLexa\_Mi\_Cell\_2008\_hit\_target\_site.txt

SRNA\_AG01\_SoLexa\_Mi2008\_4\_14843\_hit1

```
5' GGAGAAGCAGGGCACGUGCAU
   ||||| :
   CCUCUUCGUCCCAUGCACGAG 5'
AT1G56010.2      800      820
NAC1
```

SRNA\_AG01\_SoLexa\_Mi2008\_1\_14846\_hit1

```
5' GGAGAAGCAGGGCACGUGCGA
   ||||| :
   CCUCUUCGUCCCAUGCACGAG 5'
AT1G56010.2      800      820
NAC1
```

SRNA\_AG01\_SoLexa\_Mi2008\_3\_40196\_hit1

```
5' UGGAGAAGCAGGGCACGUGCAA
   ||||| :
   ACCUCUUCGUCCCAUGCACGAG 5'
AT1G56010.2      800      821
NAC1
```

SRNA\_AG01\_SoLexa\_Mi2008\_284\_40197\_hit1

```
5' UGGAGAAGCAGGGCACGUGCAU
   ||||| :
   ACCUCUUCGUCCCAUGCACGAG 5'
AT1G56010.2      800      821
NAC1
```

SRNA\_AG01\_SoLexa\_Mi2008\_10440\_13909\_hit2

```
5' GAGAAGCAGGGCACGUGCA
   ||||| :
   CUCUUCGUCCCAUGCACGA 5'
AT1G56010.2      801      819
NAC1
```

SRNA\_AG01\_SoLexa\_Mi2008\_110\_13911\_hit1

```
5' GAGAAGCAGGGCACGUGCG
   ||||| :
   CUCUUCGUCCCAUGCACGA 5'
AT1G56010.2      801      819
NAC1
```

SRNA\_AG01\_SoLexa\_Mi2008\_41322\_14841\_hit2

```
5' GGAGAAGCAGGGCACGUGCA
   ||||| :
   CCUCUUCGUCCCAUGCACGA 5'
AT1G56010.2      801      820
NAC1
```

SRNA\_AG01\_SoLexa\_Mi2008\_422\_14845\_hit1

```
5' GGAGAAGCAGGGCACGUGCG
   ||||| :
   CCUCUUCGUCCCAUGCACGA 5'
AT1G56010.2      801      820
NAC1
```

SRNA\_AG01\_SoLexa\_Mi2008\_370931\_40195\_hit2

```
5' UGGAGAAGCAGGGCACGUGCA
   ||||| :
   ACCUCUUCGUCCCAUGCACGA 5'
AT1G56010.2      801      821
NAC1
```

stems\_1sup\_AG01\_SoLexa\_Mi\_Cell\_2008\_hit\_target\_site.txt

SRNA\_AG01\_SoLexa\_Mi2008\_7589\_40199\_hit1

```
5' UGGAGAAGCAGGGCACGUGCG
   |||
   ACCUCUUCGUCCCAUGCACGA 5'
AT1G56010.2      801      821
NAC1
```

SRNA\_AG01\_SoLexa\_Mi2008\_2\_40202\_hit1

```
5' UGGAGAAGCAGGGUACGUGCU
   |||
   ACCUCUUCGUCCCAUGCACGA 5'
AT1G56010.2      801      821
NAC1
```

SRNA\_AG01\_SoLexa\_Mi2008\_1214\_3232\_hit1

```
5' AUGGAGAAGCAGGGCACGUGCA
   |||
   AACCUCUUCGUCCCAUGCACGA 5'
AT1G56010.2      801      822
NAC1
```

SRNA\_AG01\_SoLexa\_Mi2008\_24\_3233\_hit1

```
5' AUGGAGAAGCAGGGCACGUGCG
   |||
   AACCUCUUCGUCCCAUGCACGA 5'
AT1G56010.2      801      822
NAC1
```

SRNA\_AG01\_SoLexa\_Mi2008\_9\_52081\_hit1

```
5' UUGGAGAAGCAGGGCACGUGCA
   |||
   AACCUCUUCGUCCCAUGCACGA 5'
AT1G56010.2      801      822
NAC1
```

SRNA\_AG01\_SoLexa\_Mi2008\_23\_14840\_hit3

```
5' GGAGAAGCAGGGCACGUGC
   |||
   CCUCUUCGUCCCAUGCACG 5'
AT1G56010.2      802      820
NAC1
```

SRNA\_AG01\_SoLexa\_Mi2008\_1\_40190\_hit1

```
5' UGGAGAAGCAGGGCACGUAA
   |||
   ACCUCUUCGUCCCAUGCACG 5'
AT1G56010.2      802      821
NAC1
```

SRNA\_AG01\_SoLexa\_Mi2008\_404\_40194\_hit3

```
5' UGGAGAAGCAGGGCACGUGC
   |||
   ACCUCUUCGUCCCAUGCACG 5'
AT1G56010.2      802      821
NAC1
```

SRNA\_AG01\_SoLexa\_Mi2008\_2\_40201\_hit1

```
5' UGGAGAAGCAGGGUACGUGC
   |||
   ACCUCUUCGUCCCAUGCACG 5'
AT1G56010.2      802      821
NAC1
```

stems\_1sup\_AG01\_SoLexa\_Mi\_Cell\_2008\_hit\_target\_site.txt

SRNA\_AG01\_SoLexa\_Mi2008\_9\_40189\_hit2

5' UGGAGAAGCAGGGCACGUA  
 |||  
 ACCUCUUCGUCCCAUGCAC 5'  
 AT1G56010.2 803 821  
 NAC1

SRNA\_AG01\_SoLexa\_Mi2008\_366\_40193\_hit3

5' UGGAGAAGCAGGGCACGUG  
 |||  
 ACCUCUUCGUCCCAUGCAC 5'  
 AT1G56010.2 803 821  
 NAC1

SRNA\_AG01\_SoLexa\_Mi2008\_1\_40200\_hit1

5' UGGAGAAGCAGGGUACGUG  
 |||  
 ACCUCUUCGUCCCAUGCAC 5'  
 AT1G56010.2 803 821  
 NAC1

SRNA\_AG01\_SoLexa\_Mi2008\_2\_3231\_hit2

5' AUGGAGAAGCAGGGCACGUG  
 |||  
 AACCUCUUCGUCCCAUGCAC 5'  
 AT1G56010.2 803 822  
 NAC1

SRNA\_AG01\_SoLexa\_Mi2008\_5\_12305\_hit2

5' CUU-AAAGGAAUUGACGGAAGG  
 ||| ||| ||| ||| ||| |||  
 GAAGUUUC-UUAACUACCUUCC 5'  
 AT1G60960.1 1077 1097  
 putative iron-regulated transporter

SRNA\_AG01\_SoLexa\_Mi2008\_1\_14896\_hit1

5' GGAG-UUUACGCAAAGGAAAGA  
 :||| ||| ||| ||| ||| ||| |||  
 UCUCUAAAU-CGUUCCUUUCU 5'  
 AT1G64390.1 1341 1361  
 endo-beta-1,4-glucanase-like protein

SRNA\_AG01\_SoLexa\_Mi2008\_1\_13420\_hit2

5' GAAGAAGAAGAAGACUCUU  
 ||| ||| ||| ||| ||| ||| |||  
 CUUCUUCU-CUUCUGAGAA 5'  
 AT1G64390.1 304 321  
 endo-beta-1,4-glucanase-like protein

SRNA\_AG01\_SoLexa\_Mi2008\_1\_27754\_hit1

5' UCACCUCAUGAUGAACUUGGA  
 ||| | ||| ||| ||| ||| ||| |||  
 CGUGGUG-ACUACUUGAACCU 5'  
 AT1G64660.1 798 817  
 similar to O-succinylhomoserine sulfhydrylase

SRNA\_AG01\_SoLexa\_Mi2008\_1\_14104\_hit1

5' GAGGGUAAUUGGGUCAUUU  
 ||| ||| ||| ||| ||| ||| ||| |||  
 AUCCCAUUAACCCA--AAA 5'  
 AT1G64710.1 1132 1148  
 alcohol dehydrogenase (EC 1.1.1.1) like protein

stems\_1sup\_AG01\_SoLexa\_Mi\_Cell\_2008\_hit\_target\_site.txt

SRNA\_AG01\_SoLexa\_Mi2008\_2\_41105\_hit1  
5' UGGCAAGUUGGUCAGGGUUGAU  
||| || ||| |||||  
ACC-UUGAAC-AGUCCCAACUA 5'  
AT1G64710.2 684 703  
alcohol dehydrogenase (EC 1.1.1.1) like protein

SRNA\_AG01\_SoLexa\_Mi2008\_2\_41105\_hit1  
5' UGGCAAGUUGGUCAGGGUUGAU  
||| || ||| |||||  
ACC-UUGAAC-AGUCCCAACUA 5'  
AT1G64710.1 829 848  
alcohol dehydrogenase (EC 1.1.1.1) like protein

SRNA\_AG01\_SoLexa\_Mi2008\_1\_14104\_hit1  
5' GAGGGUAAUUGGGUCAUUU  
||||| ||||| |||  
AUCCCAUUAACCCA--AAA 5'  
AT1G64710.2 987 1003  
alcohol dehydrogenase (EC 1.1.1.1) like protein

SRNA\_AG01\_SoLexa\_Mi2008\_1\_36546\_hit1  
5' UGAGGGUUGCAAGGAGUUGGU  
||||| ||||| |||||  
ACUCCCAACGAUCCUGAACCU 5'  
AT1G65480.1 303 323  
flowering time locus T (FT)

SRNA\_AG01\_SoLexa\_Mi2008\_1\_37716\_hit3  
5' UGCAACAAAACAGGUGGAUUCU  
|| ||||| ||||| |||||  
AC-UUGUUU-GUCCACCAAAGA 5'  
AT1G65480.1 54 73  
flowering time locus T (FT)

SRNA\_AG01\_SoLexa\_Mi2008\_1\_7340\_hit1  
5' CAUGUAAAACACUCUC-UUU  
||||| ||||| |||  
UAACAUUUUGUGAGAGUAAA 5'  
AT1G65480.1 774 793  
flowering time locus T (FT)

SRNA\_AG01\_SoLexa\_Mi2008\_1\_15859\_hit1  
5' GUGAGAGAGAGGUGUAA-UU  
|:|||||:||||| ||  
CGCUCUCUCUUCACAUUCA 5'  
AT1G66970.1 1591 1610  
Glycerophosphodiesterase-like (GPD3)

SRNA\_AG01\_SoLexa\_Mi2008\_1\_341\_hit1  
5' AAAGAAACAGAGAGGAAGAU  
||| ||||| ||||| |||  
UUU-UUUGUCUCUC-UCUU 5'  
AT1G66970.1 2364 2381  
Glycerophosphodiesterase-like (GPD3)

SRNA\_AG01\_SoLexa\_Mi2008\_1\_11311\_hit1  
5' CUGAA-AAAAAAGAGAGGG  
|||| ||||| ||||| |||||  
UACUUCUUUUUUUCUCUCA 5'  
AT1G67360.2 1026 1045  
unknown protein

stems\_1sup\_AG01\_SoLexa\_Mi\_Cell\_2008\_hit\_target\_site.txt

SRNA\_AG01\_SoLexa\_Mi2008\_3\_492\_hit1

5' AAAGGACCAGGACAGAAUCAA  
 |||| ||||||| |||||||  
 UUUC-UGGUCCUCUCUUAGUC 5'  
 AT1G67360.1 332 351  
 unknown protein

SRNA\_AG01\_SoLexa\_Mi2008\_3\_492\_hit1

5' AAAGGACCAGGACAGAAUCAA  
 |||| ||||||| |||||||  
 UUUC-UGGUCCUCUCUUAGUC 5'  
 AT1G67360.2 430 449  
 unknown protein

SRNA\_AG01\_SoLexa\_Mi2008\_1\_11311\_hit1

5' CUGAA-AAAAAAGAGAGGG  
 |||| ||||||| |||||||  
 UACUUCUUUUUUCUCUCCA 5'  
 AT1G67360.1 928 947  
 unknown protein

SRNA\_AG01\_SoLexa\_Mi2008\_2\_2764\_hit1

5' AUCAAGAUCCAUCUUACU-CU  
 ||| | ||||||| || ||  
 UAGCU-UAGGUAGAAUGAUGA 5'  
 AT1G67750.1 1439 1458  
 pectate lyase 1-like protein

SRNA\_AG01\_SoLexa\_Mi2008\_1\_36753\_hit1

5' UGAGUCAUGGU-CGUUUUCUGG  
 ||||||| || |||||  
 ACUCAGUACCAGGC-AAAGACG 5'  
 AT1G67810.1 603 623  
 putative protein

SRNA\_AG01\_SoLexa\_Mi2008\_1\_55298\_hit1

5' UUUGAUGCGCCAC-UCUUGUAGC  
 ||||||| || |||||  
 AAACUACGCGGUGCAG-UCAUCG 5'  
 AT1G67810.1 628 649  
 putative protein

SRNA\_AG01\_SoLexa\_Mi2008\_1\_2360\_hit1

5' AUAACAAGUCCUGUUGGGUC  
 | ||||||| |||||||  
 UCUUGUUCAGGAAAACCCAG 5'  
 AT1G68550.1 319 338  
 putative AP2 domain transcription factor

SRNA\_AG01\_SoLexa\_Mi2008\_1\_2360\_hit1

5' AUAACAAGUCCUGUUGGGUC  
 | ||||||| |||||||  
 UCUUGUUCAGGAAAACCCAG 5'  
 AT1G68550.2 329 348  
 putative AP2 domain transcription factor

SRNA\_AG01\_SoLexa\_Mi2008\_2\_13457\_hit1

5' GAAGAUGAAGAUGAAGU-GGUA  
 ||||||| ||||||| ||:|  
 CUUCUACUGCUACUUAACCGU 5'  
 AT1G69295.1 1236 1257  
 predicted GPI-anchored protein

stems\_1sup\_AG01\_SoLexa\_Mi\_Cell\_2008\_hit\_target\_site.txt

SRNA\_AG01\_SoLexa\_Mi2008\_1\_1242\_hit1

5' ACAA-AUGACGAUGAUGUUGGC  
||| |||||  
CGUUCUACUGCUACUUAACCG 5'

AT1G69295.1 1237 1258  
predicted GPI-anchored protein

SRNA\_AG01\_SoLexa\_Mi2008\_1\_34620\_hit1

5' UGAAGAUGAUGAUGAAGUU  
:|||||:|||||  
GCUUCUACUGCUACUCAA 5'

AT1G69295.1 1239 1257  
predicted GPI-anchored protein

SRNA\_AG01\_SoLexa\_Mi2008\_1\_46690\_hit3

5' UUAUAU-CUUUAUGAUUUUUUA  
||||| || |||||  
UAUUAUCGAUAUACUAAUAAU 5'

AT1G69295.1 252 273  
predicted GPI-anchored protein

SRNA\_AG01\_SoLexa\_Mi2008\_2\_9402\_hit1

5' CGUGGU-AGAGAUGAGUUUUUAU  
||||| |||||  
GCACCACUCUCUACUAAAAACC 5'

AT1G69295.1 625 647  
predicted GPI-anchored protein

SRNA\_AG01\_SoLexa\_Mi2008\_2\_7120\_hit1

5' CAUGAAUUUGAGGUUUACAG  
||||| |||||:||| |||  
GUACUAAAACUCUAAA-GUC 5'

AT1G69410.1 56 74  
eukaryotic initiation factor 5A (eIF-5A) like protein

SRNA\_AG01\_SoLexa\_Mi2008\_1\_1110\_hit1

5' AAUGCUCAGGUCGAGGUGGCC  
||| |||||  
UUA-GAGUCCAGCUCCAC-AGG 5'

AT1G69880.1 129 148  
thioredoxin like protein

SRNA\_AG01\_SoLexa\_Mi2008\_1\_1109\_hit1

5' AAUGCUCAGGUCGAGGUGGCC  
||| |||||  
UUA-GAGUCCAGCUCCAC-AG 5'

AT1G69880.1 130 148  
thioredoxin like protein

SRNA\_AG01\_SoLexa\_Mi2008\_1\_45596\_hit2

5' UGUGUACA-GGCUAAGAUCUGG  
||||| | |||||  
CCACAU-UACCGAUUCUAGACC 5'

AT1G72070.1 206 226  
hypothetical protein

SRNA\_AG01\_SoLexa\_Mi2008\_23\_12874\_hit1

5' CUUGC GGGUGUUCUUGAUGUC  
||| ||| |||||  
AAACUCCCUCAAGAACUACAG 5'

AT1G72680.1 1184 1204  
putative cinnamyl-alcohol dehydrogenase

stems\_1sup\_AG01\_SoLexa\_Mi\_Cell\_2008\_hit\_target\_site.txt

SRNA\_AG01\_SoLexa\_Mi2008\_1\_10750\_hit1

5' CUC-AGUGCCUUCAUCUUCGUC  
 ||| |||||  
 GAGAUACGGAAGUAGAC-CAG 5'  
 AT1G72680.1 849 869  
 putative cinnamyl-alcohol dehydrogenase

SRNA\_AG01\_SoLexa\_Mi2008\_1\_38353\_hit4

5' UGCCAAGGAGUCGCAACUCCGA  
 ||||| | ||||| |||||  
 ACGGU-C-UCAGCGUUCAGGCU 5'  
 AT1G73260.1 631 650  
 putative trypsin inhibitor (At1g73260)

SRNA\_AG01\_SoLexa\_Mi2008\_9\_49410\_hit1

5' UUC-GGA-GCCACUUGUGUUUGA  
 ||| ||| ||||| |||||  
 AAGACCUUCGGUGAACCCAAACU 5'  
 AT1G73330.1 466 488  
 unknown protein

SRNA\_AG01\_SoLexa\_Mi2008\_1\_47836\_hit2

5' UUAGG-GUUGCUGCGUUCUGGA  
 || || ||||| |||||  
 AA-CCUCAACGACGGAAGACCU 5'  
 AT1G73330.1 632 652  
 unknown protein

SRNA\_AG01\_SoLexa\_Mi2008\_1\_23512\_hit1

5' UAGGU-GUGAUGGAUAUGGCUG  
 ||||| ||||| ||||| ||  
 AUCCAUCACUACCUAUACC-AC 5'  
 AT1G73330.1 75 95  
 unknown protein

SRNA\_AG01\_SoLexa\_Mi2008\_10\_14179\_hit22

5' GAUAGGUGUGUAUGUGAGAAG  
 ||||| ||||| |||  
 CUAUCCACAAAUACAC-CUUG 5'  
 AT1G74210.1 1263 1282  
 glycerophosphodiester phosphodiesterase like protein

SRNA\_AG01\_SoLexa\_Mi2008\_16\_36976\_hit22

5' UGAUAGGUGUGUAUGUGAGAA  
 ||||| ||||| |||  
 ACUAUCCACAAAUACAC-CUU 5'  
 AT1G74210.1 1264 1283  
 glycerophosphodiester phosphodiesterase like protein

SRNA\_AG01\_SoLexa\_Mi2008\_4\_36977\_hit1

5' UGAUAGGUGUGUAUGUGGGAA  
 ||||| ||||| |||  
 ACUAUCCACAAAUACA-CCUU 5'  
 AT1G74210.1 1264 1283  
 glycerophosphodiester phosphodiesterase like protein

SRNA\_AG01\_SoLexa\_Mi2008\_1\_51006\_hit22

5' UUGAUAGGUGUGUAUGUGAGAA  
 ||||| ||||| |||  
 CACUAUCCACAAAUACAC-CUU 5'  
 AT1G74210.1 1264 1284  
 glycerophosphodiester phosphodiesterase like protein

stems\_1sup\_AG01\_SoLexa\_Mi\_Cell\_2008\_hit\_target\_site.txt

SRNA\_AG01\_SoLexa\_Mi2008\_1\_51005\_hit24

5' UUGAUAGGUGUGUAUGUGAGA  
||||||| ||||| ||  
CACUAUCCACAAUACAC-CU 5'

AT1G74210.1 1265 1284

glycerophosphodiester phosphodiesterase like protein

SRNA\_AG01\_SoLexa\_Mi2008\_3\_53844\_hit1

5' UUGUUUCGUGGAGAAUA-AAU  
||||||| ||||| |||  
AACAAAGCAGCUCUUAUGUUA 5'

AT1G74210.1 357 377

glycerophosphodiester phosphodiesterase like protein

SRNA\_AG01\_SoLexa\_Mi2008\_1\_3\_hit25

5' AAAAAAAAAAAAAAGAAAGA  
||||||| |||||  
CCUUUUUUUUUUUGUUUCU 5'

AT1G78370.1 789 807

unknown protein

SRNA\_AG01\_SoLexa\_Mi2008\_1\_41610\_hit1

5' UGGCUGAACGAGUUUGGCAGG  
||||||| ||||| |||  
ACCGACUUGCUCGA-CCG-CC 5'

AT1G80160.1 566 584

unknown protein

SRNA\_AG01\_SoLexa\_Mi2008\_1\_5313\_hit2

5' CACACGCAAU-AAAGUAGACAAG  
||||||| ||||| |||||  
GUGUGCGUUAGUUUC-UCUGUUA 5'

AT1G80160.1 658 679

unknown protein

SRNA\_AG01\_SoLexa\_Mi2008\_1\_41610\_hit1

5' UGGCUGAACGAGUUUGGCAGG  
||||||| ||||| |||  
ACCGACUUGCUC-GACCG-CC 5'

AT1G80160.2 664 682

unknown protein

SRNA\_AG01\_SoLexa\_Mi2008\_1\_5313\_hit2

5' CACACGCAAU-AAAGUAGACAAG  
||||||| ||||| |||||  
GUGUGCGUUAGUUUC-UCUGUUA 5'

AT1G80160.2 756 777

unknown protein

SRNA\_AG01\_SoLexa\_Mi2008\_2\_49995\_hit1

5' UUGAACAGAAGUCGUCGAGGAU  
||||||| ||||| |||||  
AACUUGUCUUCAGCAGCUCCUA 5'

AT2G04160.1 1693 1714

subtilisin-like serine protease AIR3

SRNA\_AG01\_SoLexa\_Mi2008\_1\_17635\_hit2

5' UAACUGAGAGGUGUUGC-UUACA  
|||||||:||||||| || |||  
AUUGACUUCCACAACGGAA-GU 5'

AT2G04160.1 1880 1901

subtilisin-like serine protease AIR3

stems\_1sup\_AG01\_SoLexa\_Mi\_Cell\_2008\_hit\_target\_site.txt

SRNA\_AG01\_SoLexa\_Mi2008\_1\_41483\_hit1

5' UGGCGGCCAGCAGACUUUGUA  
|||||  
ACCGCCGGUCGUCUGAAACAU 5'

AT2G04160.1 831 851  
subtilisin-like serine protease AIR3

SRNA\_AG01\_SoLexa\_Mi2008\_2\_36903\_hit1

5' UGAGUUGGGUUUCACGGUGGC  
|||||  
ACUCAACCCAAAGUGCCACCG 5'

AT2G15320.1 125 145  
putative leucine-rich repeat disease resistance protein

SRNA\_AG01\_SoLexa\_Mi2008\_1\_40683\_hit1

5' UGGAGUCAGACGAGCAAGUGA  
|||||  
ACCUCAGUCUGCUCGUUCACU 5'

AT2G15320.1 234 254  
putative leucine-rich repeat disease resistance protein

SRNA\_AG01\_SoLexa\_Mi2008\_7\_14062\_hit1

5' GAGGAGGAGGAGGUGAACA  
|||||  
CUCCUCCUCCUCCUUCU 5'

AT2G15320.1 46 64  
putative leucine-rich repeat disease resistance protein

SRNA\_AG01\_SoLexa\_Mi2008\_13\_14047\_hit1

5' GAGGAAGACGAGGAGGAAGAGGA  
|||||  
CUCCU-CUUCUCCUCCUCCU 5'

AT2G15320.1 52 73  
putative leucine-rich repeat disease resistance protein

SRNA\_AG01\_SoLexa\_Mi2008\_2\_55158\_hit1

5' UUUGAGAUGGGUCCUGAUAAA  
|||||  
AAACUCUACCCAGGACUAUUU 5'

AT2G15320.1 640 660  
putative leucine-rich repeat disease resistance protein

SRNA\_AG01\_SoLexa\_Mi2008\_10\_3059\_hit1

5' AUGAGUUCUCCGCGAUAAU  
|||||  
UACUCAAGAGUCGCUA-AA 5'

AT2G15320.1 700 717  
putative leucine-rich repeat disease resistance protein

SRNA\_AG01\_SoLexa\_Mi2008\_2\_34868\_hit1

5' UGAAGUC-CGGUUCUCGCAUGGU  
|||||  
ACUUCAGUGCCAAGAGCGUAGGA 5'

AT2G15490.2 355 377  
putative glucosyltransferase

SRNA\_AG01\_SoLexa\_Mi2008\_1\_48518\_hit2

5' UUCAAGGACAAGUCACAUGAGC  
|||||:|||||  
AAGUUCUUGUUCAGUUUACUCA 5'

AT2G15490.2 398 419  
putative glucosyltransferase

stems\_1sup\_AG01\_SoLexa\_Mi\_Cell\_2008\_hit\_target\_site.txt

SRNA\_AG01\_SoLexa\_Mi2008\_3\_11240\_hit1

5' CUCUCUCAUGUUUACAGA  
 || |||||  
 AAG-GAGUACAAUAUG-CU 5'  
 AT2G15490.2 593 609  
 putative glucosyltransferase

SRNA\_AG01\_SoLexa\_Mi2008\_10\_8366\_hit1

5' CGAAUGGAGUUUGC-ACGUU  
 |||||  
 GCUUACCUCAAA-GAAGCAA 5'  
 AT2G15490.1 710 728  
 putative glucosyltransferase

SRNA\_AG01\_SoLexa\_Mi2008\_1\_45020\_hit16

5' UGUGAU-CAGCAAAGACCAGCUG  
 |||| | ||| |||||  
 ACACAAUGUC-UUUCUGGUCGAC 5'  
 AT2G16640.1 3270 3291  
 putative chloroplast outer membrane protein

SRNA\_AG01\_SoLexa\_Mi2008\_1\_10880\_hit1

5' CUCCC-GUAUUCUCGAUAAG  
 |||| | |||||  
 GAGGGGC-UAAGAGCUAUUU 5'  
 AT2G17040.1 159 177  
 NAM (no apical meristem)-like protein

SRNA\_AG01\_SoLexa\_Mi2008\_1\_33653\_hit1

5' UCUGGUAACCUCCAAGAUGGU  
 ||||| |||| |:  
 AGACCAUUUGAAGGUU-UGCCA 5'  
 AT2G17040.1 714 734  
 NAM (no apical meristem)-like protein

SRNA\_AG01\_SoLexa\_Mi2008\_1\_2\_hit38

5' AAAAA-AAAA-AAAAAACCAU  
 |||| | ||| |||||  
 UUUUUUUUUUUUUUUUUUGGUA 5'  
 AT2G17130.2 1319 1339  
 NAD+ dependent isocitrate dehydrogenase subunit 2 like, IDH2

SRNA\_AG01\_SoLexa\_Mi2008\_1\_2\_hit38

5' AAAAA-AAAA-AAAAAACCAU  
 |||| | ||| |||||  
 UUUUUUUUUUUUUUUUUUGGUA 5'  
 AT2G17130.1 1331 1351  
 NAD+ dependent isocitrate dehydrogenase subunit 2 like, IDH2

SRNA\_AG01\_SoLexa\_Mi2008\_1\_34613\_hit1

5' UGAAGAUGAAGAUGAGUUGU  
 ||||| |||||:  
 UCUUCUACUUCUUCUACACG 5'  
 AT2G17130.2 13 32  
 NAD+ dependent isocitrate dehydrogenase subunit 2 like, IDH2

SRNA\_AG01\_SoLexa\_Mi2008\_1\_19461\_hit1

5' UACAGCUGUGUCAUGGUACCU  
 |||||  
 AUGUCGACACAGUACCAUGGC 5'  
 AT2G17500.4 1216 1236  
 unknown protein

stems\_1sup\_AG01\_SoLexa\_Mi\_Cell\_2008\_hit\_target\_site.txt

SRNA\_AG01\_SoLexa\_Mi2008\_1\_19461\_hit1

5' UACAGCUGUGUCAUGGUACCU  
|||||  
AUGUCGACACAGUACCAUGGC 5'  
AT2G17500.3 1223 1243  
unknown protein

SRNA\_AG01\_SoLexa\_Mi2008\_1\_19461\_hit1

5' UACAGCUGUGUCAUGGUACCU  
|||||  
AUGUCGACACAGUACCAUGGC 5'  
AT2G17500.1 1278 1298  
unknown protein

SRNA\_AG01\_SoLexa\_Mi2008\_1\_19461\_hit1

5' UACAGCUGUGUCAUGGUACCU  
|||||  
AUGUCGACACAGUACCAUGGC 5'  
AT2G17500.2 1295 1315  
unknown protein

SRNA\_AG01\_SoLexa\_Mi2008\_26\_44780\_hit1

5' UGUCGUGUCUUUGAGUGUCCAA  
||||| ||| || |||  
ACAGCACAGAACCUCCCA-GUU 5'  
AT2G18960.1 1684 1704  
plasma membrane proton ATPase (PMA)

SRNA\_AG01\_SoLexa\_Mi2008\_1\_51592\_hit1

5' UUGCCGUAGUUGAU-GAAGAGC  
|||||:||||| | |||||  
AACGGCGUCAAC-AGCUUCUCG 5'  
AT2G20610.2 255 275  
tyrosine aminotransferase like protein

SRNA\_AG01\_SoLexa\_Mi2008\_1\_52954\_hit1

5' UUGGUCCAUGGUGUUUU-GACA  
||| ||||| ||| |||  
AAC-AGGUACCACAAAAACUUU 5'  
AT2G21640.1 238 258  
unknown protein

SRNA\_AG01\_SoLexa\_Mi2008\_1\_21384\_hit1

5' UAGAGGAGGCGCGUUGACGGU  
|||||  
AUCUCCUCCGCGCAACUGCCA 5'  
AT2G22500.1 438 458  
putative mitochondrial dicarboxylate carrier protein

SRNA\_AG01\_SoLexa\_Mi2008\_2\_4570\_hit2

5' CAAGAAGAGAUUCCAU-AGU  
||||| ||||| |||  
GUUCUUCUCUUAGGUAGUCA 5'  
AT2G22840.1 233 252  
unknown protein

SRNA\_AG01\_SoLexa\_Mi2008\_3\_5131\_hit1

5' CAAUGAAAAAGGGCCUAAU-CUC  
||||| ||| || |||  
GUUACUUUUUCCAGGAAAAUGAG 5'  
AT2G22840.1 471 493  
unknown protein

stems\_1sup\_AG01\_SoLexa\_Mi\_Cell\_2008\_hit\_target\_site.txt

sRNA\_AG01\_SoLexa\_Mi2008\_9\_5355\_hit1

```
5' CACAG-CUUUCUUGAACUU
   ||||| |||||
   GUGUCCGAAAGAACUUGCUA 5'
AT2G22840.1 780 799
unknown protein
```

sRNA\_AG01\_SoLexa\_Mi2008\_138\_7679\_hit1

```
5' CCACAG-CUUUCUUGAACUG
   ||||| |||||
   GGUGUCCGAAAGAACUUGCU 5'
AT2G22840.1 781 800
unknown protein
```

sRNA\_AG01\_SoLexa\_Mi2008\_54\_7680\_hit1

```
5' CCACAG-CUUUCUUGAACUU
   ||||| |||||
   GGUGUCCGAAAGAACUUGCU 5'
AT2G22840.1 781 800
unknown protein
```

sRNA\_AG01\_SoLexa\_Mi2008\_18\_29330\_hit1

```
5' UCCACAG-CUUUCUUGAACUG
   ||||| |||||
   AGGUGUCCGAAAGAACUUGCU 5'
AT2G22840.1 781 801
unknown protein
```

sRNA\_AG01\_SoLexa\_Mi2008\_11\_29331\_hit1

```
5' UCCACAG-CUUUCUUGAACUU
   ||||| |||||
   AGGUGUCCGAAAGAACUUGCU 5'
AT2G22840.1 781 801
unknown protein
```

sRNA\_AG01\_SoLexa\_Mi2008\_1449\_48967\_hit1

```
5' UCCACAG-CUUUCUUGAACUG
   ||||| |||||
   AAGGUGUCCGAAAGAACUUGCU 5'
AT2G22840.1 781 802
unknown protein
```

sRNA\_AG01\_SoLexa\_Mi2008\_809\_48968\_hit1

```
5' UCCACAG-CUUUCUUGAACUU
   ||||| |||||
   AAGGUGUCCGAAAGAACUUGCU 5'
AT2G22840.1 781 802
unknown protein
```

sRNA\_AG01\_SoLexa\_Mi2008\_9\_12589\_hit1

```
5' CUCCACAG-CUUUCUUGAACUG
   ||||| |||||
   GAAGGUGUCCGAAAGAACUUGCU 5'
AT2G22840.1 781 803
unknown protein
```

sRNA\_AG01\_SoLexa\_Mi2008\_8\_48966\_hit2

```
5' UCCACAG-CUUUCUUGAACU
   ||||| |||||
   AAGGUGUCCGAAAGAACUUGC 5'
AT2G22840.1 782 802
unknown protein
```

stems\_1sup\_AG01\_SoIexa\_Mi\_Cell\_2008\_hit\_target\_site.txt

SRNA\_AG01\_SoIexa\_Mi2008\_5\_12588\_hit1

```
5' CUUCCACAG-CUUUCUUGAACU
   ||| ||| ||| ||| ||| ||| |||
   GAAGGUGUCCGAAAGAACUUGC 5'
AT2G22840.1 782 803
unknown protein
```

SRNA\_AG01\_SoIexa\_Mi2008\_1\_42987\_hit1

```
5' UGGUAUGAUGAUGUGUUACUCA
   ||| ||| ||| ||| ||| |||
   ACCAUACUACAACACAA-G-GU 5'
AT2G22840.1 949 968
unknown protein
```

SRNA\_AG01\_SoIexa\_Mi2008\_6\_14255\_hit369

```
5' GAUGAUGAUGAUGAUGAUGAUGAU
   ||| ||| ||| ||| ||| ||| ||| ||| ||| :||| :
   CUACUACUACUACUACUAAUUACCG 5'
AT2G25110.1 157 180
unknown protein
```

SRNA\_AG01\_SoIexa\_Mi2008\_1\_14256\_hit8

```
5' GAUGAUGAUGAUGAUGAUGAUGUU
   ||| ||| ||| ||| ||| ||| ||| ||| ||| :||| :
   CUACUACUACUACUACUAAUUACCG 5'
AT2G25110.1 157 180
unknown protein
```

SRNA\_AG01\_SoIexa\_Mi2008\_1\_36323\_hit13

```
5' UGAGGAUGAUGAUGAUGAUGAUGA
   ||| ||| ||| ||| ||| ||| ||| ||| :|||
   ACUACUACUACUACUAAUUACC 5'
AT2G25110.1 158 178
unknown protein
```

SRNA\_AG01\_SoIexa\_Mi2008\_1\_3079\_hit472

```
5' AUGAUGAUGAUGAUGAUGAUGAUGA
   ||| ||| ||| ||| ||| ||| ||| ||| :|||
   UACUACUACUACUACUAAUUACC 5'
AT2G25110.1 158 179
unknown protein
```

SRNA\_AG01\_SoIexa\_Mi2008\_9\_14254\_hit8

```
5' GAUGAUGAUGAUGAUGAUGAUCUU
   ||| ||| ||| ||| ||| ||| ||| ||| |||
   CUACUACUACUACUACUAAUUA 5'
AT2G25110.1 160 180
unknown protein
```

SRNA\_AG01\_SoIexa\_Mi2008\_1\_34544\_hit1

```
5' UGAAGACGAAGAUGAUGAUGAUGAUA
   ||||| || ||| ||| ||| ||| ||| |||
   ACUUCUACUACUACUACUACUUAU 5'
AT2G25110.1 162 184
unknown protein
```

SRNA\_AG01\_SoIexa\_Mi2008\_1\_2280\_hit1

```
5' AG-UGGAUGAUGAUGAUGAUGAUG
   || || ||| ||| ||| ||| ||| ||| :
   UCUAC-UACUACUACUACUUAU 5'
AT2G25110.1 163 182
unknown protein
```

stems\_1sup\_AG01\_SoLexa\_Mi\_Cell\_2008\_hit\_target\_site.txt

SRNA\_AG01\_SoLexa\_Mi2008\_6\_14255\_hit369

5' GAUGAUGAUGAUGAUGAUGAUGAU  
||||| ||||||||||||||||||||  
CUACUUCUACUACUACUACUACUA 5'

AT2G25110.1 163 186

unknown protein

SRNA\_AG01\_SoLexa\_Mi2008\_1\_14256\_hit8

5' GAUGAUGAUGAUGAUGAUGAUGUU  
||||| ||||||||||||||||||||  
CUACUUCUACUACUACUACUACUA 5'

AT2G25110.1 163 186

unknown protein

SRNA\_AG01\_SoLexa\_Mi2008\_7\_3078\_hit1

5' AUGAUGAUGA-GAAUGAUGAU  
||||||| || ||||||||  
AACUACUACUACU-ACUACUA 5'

AT2G25110.1 164 183

unknown protein

SRNA\_AG01\_SoLexa\_Mi2008\_1\_36323\_hit13

5' UGAGGAUGAUGAUGAUGAUGA  
|||:||||||||||||||||||  
ACUUCUACUACUACUACUACU 5'

AT2G25110.1 164 184

unknown protein

SRNA\_AG01\_SoLexa\_Mi2008\_1\_3079\_hit472

5' AUGAUGAUGAUGAUGAUGAUGA  
||||| ||||||||||||||||||||  
UACUUCUACUACUACUACUACU 5'

AT2G25110.1 164 185

unknown protein

SRNA\_AG01\_SoLexa\_Mi2008\_1\_36898\_hit1

5' UGA-GUUGGAUGAUGAUGAUGA  
||| | || ||||||||||||||||  
ACUUCUAC-UACUACUACUACU 5'

AT2G25110.1 165 185

unknown protein

SRNA\_AG01\_SoLexa\_Mi2008\_1\_45039\_hit3

5' UG-UGAUGAUGAUGAUGAUGAUGA  
|| ||| ||||||||||||||||||||  
ACUACUUCUACUACUACUACUACU 5'

AT2G25110.1 165 188

unknown protein

SRNA\_AG01\_SoLexa\_Mi2008\_6\_14255\_hit369

5' GAUGAUGAUGAUGAUGAUGAUGAU  
||||||| ||||||||||||||||||||  
CUACUACUUCUACUACUACUACUA 5'

AT2G25110.1 166 189

unknown protein

SRNA\_AG01\_SoLexa\_Mi2008\_1\_14256\_hit8

5' GAUGAUGAUGAUGAUGAUGAUGUU  
||||||| ||||||||||||||||||||  
CUACUACUUCUACUACUACUACUA 5'

AT2G25110.1 166 189

unknown protein

stems\_1sup\_AG01\_SoLexa\_Mi\_Cell\_2008\_hit\_target\_site.txt

SRNA\_AG01\_SoLexa\_Mi2008\_7\_3078\_hit1

5' AUGAUGAUGA-GAAUGAUGAU  
||| | |||| | | |||||  
UACUUCUACUACU-ACUACUA 5'  
AT2G25110.1 167 186  
unknown protein

SRNA\_AG01\_SoLexa\_Mi2008\_1\_3079\_hit472

5' AUGAUGAUGAUGAUGAUGAUGA  
||| | ||||| |||||  
UACUACUUCUACUACUACUACU 5'  
AT2G25110.1 167 188  
unknown protein

SRNA\_AG01\_SoLexa\_Mi2008\_1\_38238\_hit1

5' UGCAUGAACAUUGAUGAUGAUGG  
|| | |||| | ||||| |||||:  
AC-UACUUCUACUACUACUACU 5'  
AT2G25110.1 168 188  
unknown protein

SRNA\_AG01\_SoLexa\_Mi2008\_3\_14271\_hit18

5' GAUGCUGAAUAUGAUGAUGA-GA  
||| | |||| | ||||| |||| |  
CUACUACUUCUACUACUACUACU 5'  
AT2G25110.1 168 190  
unknown protein

SRNA\_AG01\_SoLexa\_Mi2008\_1\_56092\_hit3

5' UUUG-UGAUGAUGAUGAUGAUGA  
: || | |||| | ||||| |||||  
GAACUACUUCUACUACUACUACU 5'  
AT2G25110.1 168 190  
unknown protein

SRNA\_AG01\_SoLexa\_Mi2008\_1\_3079\_hit472

5' AUGAUGAUGAUGAUGAUGAUGA  
||| | |||| | ||||| |||||  
CUCUACUACUUCUACUACUACU 5'  
AT2G25110.1 170 191  
unknown protein

SRNA\_AG01\_SoLexa\_Mi2008\_1\_2280\_hit1

5' AG-UGGAUGAUGAUGAUGAUG  
|| | |||| | ||||| |||||  
UCUAC-UACUUCUACUACUAC 5'  
AT2G25110.1 172 191  
unknown protein

SRNA\_AG01\_SoLexa\_Mi2008\_1\_41920\_hit17

5' UGG-GAUGAUGAAGUUGAUGAU  
|| | ||||| ||||| |||||  
ACCUCUACUACUUCUACUACUA 5'  
AT2G25110.1 173 194  
unknown protein

SRNA\_AG01\_SoLexa\_Mi2008\_1\_2638\_hit1

5' AUAGGUUGUGCAGUUUGAGCU  
||| | | ||||| ||||| |||||  
UAUCCUAGACGUCAAACUCGA 5'  
AT2G25490.1 1962 1982  
putative glucose regulated repressor protein

stems\_1sup\_AG01\_SoIexa\_Mi\_Cell\_2008\_hit\_target\_site.txt

SRNA\_AG01\_SoIexa\_Mi2008\_2\_26713\_hit3

5' UC-AAAGCCAAAUCAAUUCAC  
|| ||||| |||||  
AGCUUUCGCUUUAGUUUAGUA 5'

AT2G26530.2 431 452  
AR781, similar to yeast pheromone receptor

SRNA\_AG01\_SoIexa\_Mi2008\_1\_10600\_hit3

5' CUC-AAAGCCAAAUCAAUUCAC  
||| ||||| |||||  
GAGCUUUCGCUUUAGUUUAGUA 5'

AT2G26530.2 431 453  
AR781, similar to yeast pheromone receptor

SRNA\_AG01\_SoIexa\_Mi2008\_3\_26712\_hit3

5' UC-AAAGCCAAAUCAAUUCA  
|| ||||| |||||  
AGCUUUCGCUUUAGUUUAGU 5'

AT2G26530.2 432 452  
AR781, similar to yeast pheromone receptor

SRNA\_AG01\_SoIexa\_Mi2008\_2\_26713\_hit3

5' UC-AAAGCCAAAUCAAUUCAC  
|| ||||| |||||  
AGCUUUCGCUUUAGUUUAGUA 5'

AT2G26530.1 449 470  
AR781, similar to yeast pheromone receptor

SRNA\_AG01\_SoIexa\_Mi2008\_1\_10600\_hit3

5' CUC-AAAGCCAAAUCAAUUCAC  
||| ||||| |||||  
GAGCUUUCGCUUUAGUUUAGUA 5'

AT2G26530.1 449 471  
AR781, similar to yeast pheromone receptor

SRNA\_AG01\_SoIexa\_Mi2008\_3\_26712\_hit3

5' UC-AAAGCCAAAUCAAUUCA  
|| ||||| |||||  
AGCUUUCGCUUUAGUUUAGU 5'

AT2G26530.1 450 470  
AR781, similar to yeast pheromone receptor

SRNA\_AG01\_SoIexa\_Mi2008\_1\_14490\_hit1

5' GCAUCAAUAGAUAGUGUUGAG  
||||| ||||| | |||||  
CGUAGUUACUAUC-C-ACAUC 5'

AT2G26560.1 961 979  
similar to latex allergen from Hevea brasiliensis

SRNA\_AG01\_SoIexa\_Mi2008\_1\_806\_hit1

5' AAGAGCAUCAAUAGAUAG-UGUU  
|| ||||| ||||| |||  
UU-UCGUAGUUACUAUCCACAU 5'

AT2G26560.1 962 982  
similar to latex allergen from Hevea brasiliensis

SRNA\_AG01\_SoIexa\_Mi2008\_1\_50014\_hit1

5' UUGAA-CGACCGAGUAAGGAGU  
||||| || ||||| |||||  
AACUUUGCCGGCUCCUCCUCA 5'

AT2G26690.1 346 367  
putative nitrate transporter

stems\_1sup\_AG01\_SoIexa\_Mi\_Cell\_2008\_hit\_target\_site.txt

SRNA\_AG01\_SoIexa\_Mi2008\_2\_15799\_hit1

5' GUCUGAAGGAUUAGAGGAAC  
|| ||||| |||||  
CA-ACUCCUAACCUCCUUC 5'  
AT2G28190.1 109 127  
putative copper/zinc superoxide dismutase

SRNA\_AG01\_SoIexa\_Mi2008\_3\_29723\_hit1

5' UCCCCUACAAUGUCGAG-UAA  
| ||||| ||||| |||||  
AUGGGAAGGUUACAGCUCAAUU 5'  
AT2G30140.2 1103 1124  
putative glucosyltransferase

SRNA\_AG01\_SoIexa\_Mi2008\_3\_29723\_hit1

5' UCCCCUACAAUGUCGAGU-AA  
| ||||| ||||| |||||  
AUGGGAAGGUUACAGCUCAAUU 5'  
AT2G30140.1 1106 1127  
putative glucosyltransferase

SRNA\_AG01\_SoIexa\_Mi2008\_1\_53677\_hit1

5' UUGUGUAGAGUGUGAU-UUGGU  
||||| || ||||| |||||  
AACACUUCACACACUAAAACCA 5'  
AT2G30140.2 35 56  
putative glucosyltransferase

SRNA\_AG01\_SoIexa\_Mi2008\_1\_19407\_hit2

5' UACAGAGUCGCCGAGAUUGGU  
|| ||||| ||||| |||||  
AU-UCUCAGCGGCCUCAACCU 5'  
AT2G31190.1 26 45  
unknown protein

SRNA\_AG01\_SoIexa\_Mi2008\_1\_38236\_hit3

5' UGCAU-CUGUUGUUGGUGUUGC  
||| | |||:|||||  
ACG-ACGACGACAACCACAACG 5'  
AT2G31370.4 1254 1274  
bZIP transcription factor PosF21 / AtbZip59

SRNA\_AG01\_SoIexa\_Mi2008\_1\_38236\_hit3

5' UGCAU-CUGUUGUUGGUGUUGC  
||| | |||:|||||  
ACG-ACGACGACAACCACAACG 5'  
AT2G31370.3 1299 1319  
bZIP transcription factor PosF21 / AtbZip59

SRNA\_AG01\_SoIexa\_Mi2008\_1\_38236\_hit3

5' UGCAU-CUGUUGUUGGUGUUGC  
||| | |||:|||||  
ACG-ACGACGACAACCACAACG 5'  
AT2G31370.1 1351 1371  
bZIP transcription factor PosF21 / AtbZip59

SRNA\_AG01\_SoIexa\_Mi2008\_1\_27099\_hit1

5' UCAAGAUGCUUGAGGUUGAUG  
|||||  
AGUUCUACGAACUCCAACUAC 5'  
AT2G32680.1 1016 1036  
putative disease resistance protein

stems\_1sup\_AG01\_SoLexa\_Mi\_Cell\_2008\_hit\_target\_site.txt

SRNA\_AG01\_SoLexa\_Mi2008\_1\_32535\_hit1

5' UCGUGCGUGAUGAUGCUUUC  
|||||  
AGCACGCACUACUACGAAAGG 5'

AT2G32680.1 1951 1971  
putative disease resistance protein

SRNA\_AG01\_SoLexa\_Mi2008\_1\_48497\_hit1

5' UUCAAGAGGCAACUGUUUGGA  
|||||  
CAGUUUCUCCGAUGACAAACCU 5'

AT2G32680.1 561 582  
putative disease resistance protein

SRNA\_AG01\_SoLexa\_Mi2008\_11\_14876\_hit4

5' GGAGGUGGUGG-UGG-UGGUGGU  
|||||  
CCUCCACCACCAACCUACCACAA 5'

AT2G33770.1 108 130  
ubiquitin-conjugating enzyme E2 -like protein

SRNA\_AG01\_SoLexa\_Mi2008\_24\_502\_hit1

5' AAAGGAGGUGGUGGUUG-AU  
|  
UCUCCUCCACCACCAACCUA 5'

AT2G33770.1 114 133  
ubiquitin-conjugating enzyme E2 -like protein

SRNA\_AG01\_SoLexa\_Mi2008\_1\_28360\_hit2

5' UCAGCGGCGGAUCC-CACAAUGU  
|||||  
AGUCACCGCCU-GGCGUGUUACA 5'

AT2G33770.1 1331 1352  
ubiquitin-conjugating enzyme E2 -like protein

SRNA\_AG01\_SoLexa\_Mi2008\_2\_10859\_hit1

5' CUCCAUCUCUCUCUCUGCUU  
|||||  
GAGGAAGAGAGAGAGAC-AA 5'

AT2G33770.1 175 193  
ubiquitin-conjugating enzyme E2 -like protein

SRNA\_AG01\_SoLexa\_Mi2008\_4\_38337\_hit1

5' UGCCAAAGGAGAUUUGCCUGU  
|||||:|||||:  
ACGGUUUCUUCUAAACGGGAU 5'

AT2G33770.1 605 626  
ubiquitin-conjugating enzyme E2 -like protein

SRNA\_AG01\_SoLexa\_Mi2008\_1041\_38329\_hit2

5' UGCCAAAGGAGAUUUGCCUG  
|||||:|||||:  
ACGGUUUCUUCUAAACGGGAU 5'

AT2G33770.1 606 626  
ubiquitin-conjugating enzyme E2 -like protein

SRNA\_AG01\_SoLexa\_Mi2008\_2\_38332\_hit1

5' UGCCAAAGGAGAUUUGCCCG  
|||||:|||||:  
ACGGUUUCUUCUAAACGGGAU 5'

AT2G33770.1 606 626  
ubiquitin-conjugating enzyme E2 -like protein

stems\_1sup\_AG01\_SoLexa\_Mi\_Cell\_2008\_hit\_target\_site.txt

SRNA\_AG01\_SoLexa\_Mi2008\_92\_38333\_hit1  
5' UGCCAAAGGAGAUUUGCCCG  
|||||||:||||||| :  
ACGGUUUCUUCUAAACGGGAU 5'  
AT2G33770.1 606 626  
ubiquitin-conjugating enzyme E2 -like protein

SRNA\_AG01\_SoLexa\_Mi2008\_101\_38336\_hit1  
5' UGCCAAAGGAGAUUUGCCUG  
|||||||:||||||| :  
ACGGUUUCUUCUAAACGGGAU 5'  
AT2G33770.1 606 626  
ubiquitin-conjugating enzyme E2 -like protein

SRNA\_AG01\_SoLexa\_Mi2008\_74\_51466\_hit1  
5' UUGCCAAAGGAGAGUUGCCUG  
|||||||:||| ||||| :  
AACGGUUUCUUCUAAACGGGAU 5'  
AT2G33770.1 606 627  
ubiquitin-conjugating enzyme E2 -like protein

SRNA\_AG01\_SoLexa\_Mi2008\_7\_38328\_hit2  
5' UGCCAAAGGAGAGUUGCCU  
|||||||:||| ||||| :  
ACGGUUUCUUCUAAACGGGA 5'  
AT2G33770.1 607 626  
ubiquitin-conjugating enzyme E2 -like protein

SRNA\_AG01\_SoLexa\_Mi2008\_2\_38335\_hit1  
5' UGCCAAAGGAGAUUUGCCU  
|||||||:||||||| :  
ACGGUUUCUUCUAAACGGGA 5'  
AT2G33770.1 607 626  
ubiquitin-conjugating enzyme E2 -like protein

SRNA\_AG01\_SoLexa\_Mi2008\_1\_51465\_hit1  
5' UUGCCAAAGGAGAGUUGCCU  
|||||||:||| ||||| :  
AACGGUUUCUUCUAAACGGGA 5'  
AT2G33770.1 607 627  
ubiquitin-conjugating enzyme E2 -like protein

SRNA\_AG01\_SoLexa\_Mi2008\_3\_38327\_hit2  
5' UGCCAAAGGAGAGUUGCC  
|||||||:||| ||||| :  
ACGGUUUCUUCUAAACGGG 5'  
AT2G33770.1 608 626  
ubiquitin-conjugating enzyme E2 -like protein

SRNA\_AG01\_SoLexa\_Mi2008\_1\_38331\_hit4  
5' UGCCAAAGGAGAUUUGCC  
|||||||:||||||| :  
ACGGUUUCUUCUAAACGGG 5'  
AT2G33770.1 608 626  
ubiquitin-conjugating enzyme E2 -like protein

SRNA\_AG01\_SoLexa\_Mi2008\_4\_38337\_hit1  
5' UGCCAAAGGAGAUUUGCCUGU  
|||||||:||||||| :  
ACGGUUUCUUCUAAACGGGAUC 5'  
AT2G33770.1 738 759  
ubiquitin-conjugating enzyme E2 -like protein

stems\_1sup\_AG01\_SoLexa\_Mi\_Cell\_2008\_hit\_target\_site.txt

SRNA\_AG01\_SoLexa\_Mi2008\_2\_38332\_hit1

5' UGCCAAAGGAGAUUUGCCCGG

||||||| :  
ACGGUUUCCUCUAUACGGGAU 5'

AT2G33770.1 739 759

ubiquitin-conjugating enzyme E2 -like protein

SRNA\_AG01\_SoLexa\_Mi2008\_92\_38333\_hit1

5' UGCCAAAGGAGAUUUGCCCGG

||||||| :  
ACGGUUUCCUCUAUACGGGAU 5'

AT2G33770.1 739 759

ubiquitin-conjugating enzyme E2 -like protein

SRNA\_AG01\_SoLexa\_Mi2008\_101\_38336\_hit1

5' UGCCAAAGGAGAUUUGCCCGG

||||||| :  
ACGGUUUCCUCUAUACGGGAU 5'

AT2G33770.1 739 759

ubiquitin-conjugating enzyme E2 -like protein

SRNA\_AG01\_SoLexa\_Mi2008\_2\_7575\_hit2

5' CCAAAGGAGAGU-UGCCCGG

||||||| :  
GGUUUCCUCU-AUACGGGAU 5'

AT2G33770.1 740 758

ubiquitin-conjugating enzyme E2 -like protein

SRNA\_AG01\_SoLexa\_Mi2008\_26\_14499\_hit2

5' GCCAAAGGAGAGU-UGCCCGG

||||||| :  
CGUUUCCUCU-AUACGGGAU 5'

AT2G33770.1 740 759

ubiquitin-conjugating enzyme E2 -like protein

SRNA\_AG01\_SoLexa\_Mi2008\_2\_38335\_hit1

5' UGCCAAAGGAGAUUUGCCCGG

||||||| :  
ACGGUUUCCUCUAUACGGGA 5'

AT2G33770.1 740 759

ubiquitin-conjugating enzyme E2 -like protein

SRNA\_AG01\_SoLexa\_Mi2008\_1041\_38329\_hit2

5' UGCCAAAGGAGAGU-UGCCCGG

||||||| :  
ACGGUUUCCUCU-AUACGGGAU 5'

AT2G33770.1 740 760

ubiquitin-conjugating enzyme E2 -like protein

SRNA\_AG01\_SoLexa\_Mi2008\_74\_51466\_hit1

5' UUGCCAAAGGAGAGU-UGCCCGG

||||||| :  
AACGGUUUCCUCU-AUACGGGAU 5'

AT2G33770.1 740 761

ubiquitin-conjugating enzyme E2 -like protein

SRNA\_AG01\_SoLexa\_Mi2008\_1\_38331\_hit4

5' UGCCAAAGGAGAUUUGCCCGG

||||||| :  
ACGGUUUCCUCUAUACGGG 5'

AT2G33770.1 741 759

ubiquitin-conjugating enzyme E2 -like protein

stems\_1sup\_AG01\_SoIexa\_Mi\_Cell\_2008\_hit\_target\_site.txt

SRNA\_AG01\_SoIexa\_Mi2008\_7\_38328\_hit2

```
5' UGCCAAAGGAGAGU-UGCCCU
    |||||
    ACGGUUCCUCU-AUACGGGA 5'
```

AT2G33770.1 741 760  
ubiquitin-conjugating enzyme E2 -like protein

SRNA\_AG01\_SoIexa\_Mi2008\_1\_51465\_hit1

```
5' UUGCCAAAGGAGAGU-UGCCCU
    |||||
    AACGGUUUCCUCU-AUACGGGA 5'
```

AT2G33770.1 741 761  
ubiquitin-conjugating enzyme E2 -like protein

SRNA\_AG01\_SoIexa\_Mi2008\_3\_38327\_hit2

```
5' UGCCAAAGGAGAGU-UGCCC
    |||||
    ACGGUUCCUCU-AUACGGG 5'
```

AT2G33770.1 742 760  
ubiquitin-conjugating enzyme E2 -like protein

SRNA\_AG01\_SoIexa\_Mi2008\_1\_26738\_hit1

```
5' UCAAAGGGGAACCCAAGAUGUG
    |||||
    AGUUUCCCCUUGGGUUCUACAC 5'
```

AT2G33770.1 774 795  
ubiquitin-conjugating enzyme E2 -like protein

SRNA\_AG01\_SoIexa\_Mi2008\_6\_14501\_hit1

```
5' GCCAAAGGAGAUUUGCCCGGU
    |||||:::
    CGGUUCCUCUAAACGGGUUG 5'
```

AT2G33770.1 827 847  
ubiquitin-conjugating enzyme E2 -like protein

SRNA\_AG01\_SoIexa\_Mi2008\_4\_38334\_hit1

```
5' UGCCAAAGGAGAUUUGCCCGGU
    |||||:::
    ACGGUUCCUCUAAACGGGUUG 5'
```

AT2G33770.1 827 848  
ubiquitin-conjugating enzyme E2 -like protein

SRNA\_AG01\_SoIexa\_Mi2008\_4\_38337\_hit1

```
5' UGCCAAAGGAGAUUUGCCCGGU
    |||||::
    ACGGUUCCUCUAAACGGGUUG 5'
```

AT2G33770.1 827 848  
ubiquitin-conjugating enzyme E2 -like protein

SRNA\_AG01\_SoIexa\_Mi2008\_2\_7575\_hit2

```
5' CCAAAGGAGAGUUGCCUG
    |||||:
    GGUUCCUCUAAACGGGUU 5'
```

AT2G33770.1 828 846  
ubiquitin-conjugating enzyme E2 -like protein

SRNA\_AG01\_SoIexa\_Mi2008\_26\_14499\_hit2

```
5' GCCAAAGGAGAGUUGCCUG
    |||||:
    CGGUUCCUCUAAACGGGUU 5'
```

AT2G33770.1 828 847  
ubiquitin-conjugating enzyme E2 -like protein

stems\_1sup\_AG01\_SoLexa\_Mi\_Cell\_2008\_hit\_target\_site.txt

SRNA\_AG01\_SoLexa\_Mi2008\_1041\_38329\_hit2

```
5' UGCCAAAGGAGAGUUUGCCCG
   ||||| :
   ACGGUUCCUCUAAACGGGUU 5'
AT2G33770.1      828      848
ubiquitin-conjugating enzyme E2 -like protein
```

SRNA\_AG01\_SoLexa\_Mi2008\_2\_38332\_hit1

```
5' UGCCAAAGGAGAUUUGCCCG
   ||||| :
   ACGGUUCCUCUAAACGGGUU 5'
AT2G33770.1      828      848
ubiquitin-conjugating enzyme E2 -like protein
```

SRNA\_AG01\_SoLexa\_Mi2008\_92\_38333\_hit1

```
5' UGCCAAAGGAGAUUUGCCCG
   |||||:::
   ACGGUUCCUCUAAACGGGUU 5'
AT2G33770.1      828      848
ubiquitin-conjugating enzyme E2 -like protein
```

SRNA\_AG01\_SoLexa\_Mi2008\_101\_38336\_hit1

```
5' UGCCAAAGGAGAUUUGCCCG
   ||||| :
   ACGGUUCCUCUAAACGGGUU 5'
AT2G33770.1      828      848
ubiquitin-conjugating enzyme E2 -like protein
```

SRNA\_AG01\_SoLexa\_Mi2008\_7\_38328\_hit2

```
5' UGCCAAAGGAGAGUUUGCCCU
   ||||| :
   ACGGUUCCUCUAAACGGGU 5'
AT2G33770.1      829      848
ubiquitin-conjugating enzyme E2 -like protein
```

SRNA\_AG01\_SoLexa\_Mi2008\_2\_38335\_hit1

```
5' UGCCAAAGGAGAUUUGCCCU
   ||||| :
   ACGGUUCCUCUAAACGGGU 5'
AT2G33770.1      829      848
ubiquitin-conjugating enzyme E2 -like protein
```

SRNA\_AG01\_SoLexa\_Mi2008\_1\_51465\_hit1

```
5' UGCCAAAGGAGAGUUUGCCCU
   ||||| :
   UACGGUUUCCUCUAAACGGGU 5'
AT2G33770.1      829      849
ubiquitin-conjugating enzyme E2 -like protein
```

SRNA\_AG01\_SoLexa\_Mi2008\_3\_38327\_hit2

```
5' UGCCAAAGGAGAGUUUGCCC
   ||||| :
   ACGGUUCCUCUAAACGGG 5'
AT2G33770.1      830      848
ubiquitin-conjugating enzyme E2 -like protein
```

SRNA\_AG01\_SoLexa\_Mi2008\_1\_38331\_hit4

```
5' UGCCAAAGGAGAUUUGCCC
   ||||| :
   ACGGUUCCUCUAAACGGG 5'
AT2G33770.1      830      848
ubiquitin-conjugating enzyme E2 -like protein
```

stems\_1sup\_AG01\_SoLexa\_Mi\_Cell\_2008\_hit\_target\_site.txt

SRNA\_AG01\_SoLexa\_Mi2008\_2\_38335\_hit1

5' UGCCAAAGGAGAUUUGCCU

|||||

ACGGUUUCCUCUAAACGAG 5'

AT2G33770.1 886 905

ubiquitin-conjugating enzyme E2 -like protein

SRNA\_AG01\_SoLexa\_Mi2008\_3\_38327\_hit2

5' UGCCAAAGGAGAGUUGCC

|||||

ACGGUUUCCUCUAAACGAG 5'

AT2G33770.1 887 905

ubiquitin-conjugating enzyme E2 -like protein

SRNA\_AG01\_SoLexa\_Mi2008\_1\_38331\_hit4

5' UGCCAAAGGAGAUUUGCC

|||||

ACGGUUUCCUCUAAACGAG 5'

AT2G33770.1 887 905

ubiquitin-conjugating enzyme E2 -like protein

SRNA\_AG01\_SoLexa\_Mi2008\_2\_38335\_hit1

5' UGCCAAAGGAGAUUUGCCU

|||||

ACGGUUUCCUCUAAACGAGA 5'

AT2G33770.1 943 962

ubiquitin-conjugating enzyme E2 -like protein

SRNA\_AG01\_SoLexa\_Mi2008\_3\_38327\_hit2

5' UGCCAAAGGAGAGUUGCC

|||||

ACGGUUUCCUCUAAACGAG 5'

AT2G33770.1 944 962

ubiquitin-conjugating enzyme E2 -like protein

SRNA\_AG01\_SoLexa\_Mi2008\_1\_38331\_hit4

5' UGCCAAAGGAGAUUUGCC

|||||

ACGGUUUCCUCUAAACGAG 5'

AT2G33770.1 944 962

ubiquitin-conjugating enzyme E2 -like protein

SRNA\_AG01\_SoLexa\_Mi2008\_70\_1353\_hit7

5' ACAGAAGAGAGUGAGCACA

|||||

UGUCUUCUCUCAUUCGUUU 5'

AT2G33810.1 785 803

squamosa-promoter binding protein-like 3

SRNA\_AG01\_SoLexa\_Mi2008\_150\_13617\_hit7

5' GACAGAAGAGAGUGAGCACA

|||||

CUGUCUUCUCUCAUUCGUUU 5'

AT2G33810.1 785 804

squamosa-promoter binding protein-like 3

SRNA\_AG01\_SoLexa\_Mi2008\_714\_35241\_hit6

5' UGACAGAAGAGAGUGAGCACA

|||||

ACUGUCUUCUCUCAUUCGUUU 5'

AT2G33810.1 785 805

squamosa-promoter binding protein-like 3

SRNA\_AG01\_SoLexa\_Mi2008\_2\_11428\_hit3

5' CUGACAGAAGAGAGUGAGCAC  
| | | | | | | | | | | | | | | | : | | | | |  
GACUGUCUUCUCUCAUUCGUUU 5'

AT2G33810.1 785 806  
squamosa-promoter binding protein-like 3

SRNA\_AG01\_SoLexa\_Mi2008\_480\_13616\_hit7

5' GACAGAAGAGAGUGAGCAC  
| | | | | | | | | | | | | | | | : | | | | |  
CUGUCUUCUCUCAUUCGUU 5'

AT2G33810.1 786 804  
squamosa-promoter binding protein-like 3

SRNA\_AG01\_SoLexa\_Mi2008\_3\_8396\_hit1

5' CGACAGAAGAGAGUGAGCAC  
| | | | | | | | | | | | | | | | : | | | | |  
ACUGUCUUCUCUCAUUCGUU 5'

AT2G33810.1 786 805  
squamosa-promoter binding protein-like 3

SRNA\_AG01\_SoLexa\_Mi2008\_1\_13615\_hit4

5' GACAGAAGAGAG-AGAGCAC  
| | | | | | | | | | | | | | | | : | | | | |  
CUGUCUUCUCUCAU-UCGUUU 5'

AT2G33810.1 786 805  
squamosa-promoter binding protein-like 3

SRNA\_AG01\_SoLexa\_Mi2008\_2091\_35240\_hit6

5' UGACAGAAGAGAGUGAGCAC  
| | | | | | | | | | | | | | | | : | | | | |  
ACUGUCUUCUCUCAUUCGUU 5'

AT2G33810.1 786 805  
squamosa-promoter binding protein-like 3

SRNA\_AG01\_SoLexa\_Mi2008\_28\_11427\_hit3

5' CUGACAGAAGAGAGUGAGCAC  
| | | | | | | | | | | | | | | | : | | | | |  
GACUGUCUUCUCUCAUUCGUU 5'

AT2G33810.1 786 806  
squamosa-promoter binding protein-like 3

SRNA\_AG01\_SoLexa\_Mi2008\_4\_15853\_hit2

5' GUGACAGAAGAGAGUGAGCAC  
| | | | | | | | | | | | | | | | : | | | | |  
GACUGUCUUCUCUCAUUCGUU 5'

AT2G33810.1 786 806  
squamosa-promoter binding protein-like 3

SRNA\_AG01\_SoLexa\_Mi2008\_2\_35238\_hit4

5' UGACAGAAGAGAG-AGAGCAC  
| | | | | | | | | | | | | | | | : | | | | |  
ACUGUCUUCUCUCAU-UCGUUU 5'

AT2G33810.1 786 806  
squamosa-promoter binding protein-like 3

SRNA\_AG01\_SoLexa\_Mi2008\_1778\_50260\_hit1

5' UUGACAGAAGAGAGUGAGCAC  
: | | | | | | | | | | | | | | | | : | | | | |  
GACUGUCUUCUCUCAUUCGUU 5'

AT2G33810.1 786 806  
squamosa-promoter binding protein-like 3

SRNA\_AG01\_SoLexa\_Mi2008\_1\_13614\_hit8

5' GACAGAAGAGAG-AGAGCAC  
 |||||  
 CUGUCUUCUCUCAU-UCGUU 5'  
 AT2G33810.1 787 805  
 squamosa-promoter binding protein-like 3

SRNA\_AG01\_SoLexa\_Mi2008\_30\_35239\_hit6

5' UGACAGAAGAGAGUGAGCA  
 |||||:||||  
 ACUGUCUUCUCUCAUUCGU 5'  
 AT2G33810.1 787 805  
 squamosa-promoter binding protein-like 3

SRNA\_AG01\_SoLexa\_Mi2008\_1\_11426\_hit3

5' CUGACAGAAGAGAGUGAGCA  
 |||||:||||  
 GACUGUCUUCUCUCAUUCGU 5'  
 AT2G33810.1 787 806  
 squamosa-promoter binding protein-like 3

SRNA\_AG01\_SoLexa\_Mi2008\_12\_35237\_hit8

5' UGACAGAAGAGAG-AGAGCAC  
 |||||  
 ACUGUCUUCUCUCAU-UCGUU 5'  
 AT2G33810.1 787 806  
 squamosa-promoter binding protein-like 3

SRNA\_AG01\_SoLexa\_Mi2008\_16\_50259\_hit1

5' UUGACAGAAGAGAGUGAGCA  
 :|||||:||||  
 GACUGUCUUCUCUCAUUCGU 5'  
 AT2G33810.1 787 806  
 squamosa-promoter binding protein-like 3

SRNA\_AG01\_SoLexa\_Mi2008\_1\_50258\_hit1

5' UUGACAGAAGAGAGUGAGC  
 :|||||:|||  
 GACUGUCUUCUCUCAUUCG 5'  
 AT2G33810.1 788 806  
 squamosa-promoter binding protein-like 3

SRNA\_AG01\_SoLexa\_Mi2008\_1\_39748\_hit1

5' UGGAAGCAGAUUGGUUCGUU  
 ||||| |||||  
 ACCUUGGUCUACCAAGCUA 5'  
 AT2G33860.1 1523 1541  
 auxin response transcription factor 3 (ETTIN/ARF3)

SRNA\_AG01\_SoLexa\_Mi2008\_1\_35469\_hit1

5' UGACCUUGUAAGACCCCAUCU  
 |||||:|||| || |||  
 ACUGGAACGUUCUG-GG-AGA 5'  
 AT2G33860.1 1672 1690  
 auxin response transcription factor 3 (ETTIN/ARF3)

SRNA\_AG01\_SoLexa\_Mi2008\_7\_33918\_hit1

5' UCUUGACCUUGUAAGACCCCA  
 |||||:|||||  
 AGAACUGGAACGUUCUGGGAG 5'  
 AT2G33860.1 1672 1692  
 auxin response transcription factor 3 (ETTIN/ARF3)

stems\_1sup\_AG01\_SoLexa\_Mi\_Cell\_2008\_hit\_target\_site.txt

SRNA\_AG01\_SoLexa\_Mi2008\_7\_49853\_hit1  
5' UUCUUGACCUUGUAAGACCCCA  
|||||||:|||||||  
AAGAACUGGAACGUUCUGGGAG 5'  
AT2G33860.1 1672 1693  
auxin response transcription factor 3 (ETTIN/ARF3)

SRNA\_AG01\_SoLexa\_Mi2008\_7\_12746\_hit1  
5' CUUGACCUUGUAAGACCCC  
|||||||:|||||||  
GAACUGGAACGUUCUGGGA 5'  
AT2G33860.1 1673 1691  
auxin response transcription factor 3 (ETTIN/ARF3)

SRNA\_AG01\_SoLexa\_Mi2008\_7\_49852\_hit1  
5' UUCUUGACCUUGUAAGACCCC  
|||||||:|||||||  
AAGAACUGGAACGUUCUGGGA 5'  
AT2G33860.1 1673 1693  
auxin response transcription factor 3 (ETTIN/ARF3)

SRNA\_AG01\_SoLexa\_Mi2008\_4\_55012\_hit1  
5' UUUCUUGACCUUGUAAGACCCC  
|||||||:|||||||  
AAAGAACUGGAACGUUCUGGGA 5'  
AT2G33860.1 1673 1694  
auxin response transcription factor 3 (ETTIN/ARF3)

SRNA\_AG01\_SoLexa\_Mi2008\_1\_55011\_hit1  
5' UUUCUUGACCUUGUAAGACCCC  
|||||||:|||||||  
AAAGAACUGGAACGUUCUGGG 5'  
AT2G33860.1 1674 1694  
auxin response transcription factor 3 (ETTIN/ARF3)

SRNA\_AG01\_SoLexa\_Mi2008\_1\_3\_hit25  
5' AAAAAAAAAAAAA--AGAAAGA  
||||||| |||||:  
UUUUUUUUUUUGAUCUUUUU 5'  
AT2G33860.1 173 193  
auxin response transcription factor 3 (ETTIN/ARF3)

SRNA\_AG01\_SoLexa\_Mi2008\_1\_2\_hit38  
5' AAA-AAAAAAAAAAAAACCAU  
||| |||||:|  
UUUCUUUUUUUUUUUGAUC 5'  
AT2G33860.1 178 197  
auxin response transcription factor 3 (ETTIN/ARF3)

SRNA\_AG01\_SoLexa\_Mi2008\_7\_12746\_hit1  
5' CUUGACCUUGUAAGACCCC  
|||||||:|||||||  
GAACUGGAACGUUCUGGAA 5'  
AT2G33860.1 1793 1811  
auxin response transcription factor 3 (ETTIN/ARF3)

SRNA\_AG01\_SoLexa\_Mi2008\_7\_49852\_hit1  
5' UUCUUGACCUUGUAAGACCCC  
|||||||:|||||||  
AAGAACUGGAACGUUCUGGAA 5'  
AT2G33860.1 1793 1813  
auxin response transcription factor 3 (ETTIN/ARF3)

stems\_1sup\_AG01\_SoLexa\_Mi\_Cell\_2008\_hit\_target\_site.txt

sRNA\_AG01\_SoLexa\_Mi2008\_4\_55012\_hit1

5' UUUCUUGACCUUGUAAGACCCC  
|:|  
AAAGAACUGGAACGUUCUGGAA 5'

AT2G33860.1 1793 1814  
auxin response transcription factor 3 (ETTIN/ARF3)

sRNA\_AG01\_SoLexa\_Mi2008\_1\_55011\_hit1

5' UUUCUUGACCUUGUAAGACCCC  
|:|  
AAAGAACUGGAACGUUCUGGAA 5'

AT2G33860.1 1794 1814  
auxin response transcription factor 3 (ETTIN/ARF3)

sRNA\_AG01\_SoLexa\_Mi2008\_1\_42435\_hit1

5' UGGGGGGAGGAUACGUGUACU  
|:|  
ACCCCCUCCUAUGCACAUGA 5'

AT2G33860.1 1901 1921  
auxin response transcription factor 3 (ETTIN/ARF3)

sRNA\_AG01\_SoLexa\_Mi2008\_2\_52\_hit1

5' AAAAA-AGAGAGAUACAGAGAU  
|:|  
UUUUUCUCUCUUUGUCUCUA 5'

AT2G33860.1 345 366  
auxin response transcription factor 3 (ETTIN/ARF3)

sRNA\_AG01\_SoLexa\_Mi2008\_1\_43638\_hit1

5' UGGUGUCAGAUGUGUGUG-UGU  
|:|  
ACCACUGACUACACACCACA 5'

AT2G33860.1 39 60  
auxin response transcription factor 3 (ETTIN/ARF3)

sRNA\_AG01\_SoLexa\_Mi2008\_2\_8957\_hit1

5' CGGACCAGGCUUCAUCCCCC  
|:|  
GCCUGGUCCGAAGUAGGGUUA 5'

AT2G34710.1 868 888  
homeodomain transcription factor (ATHB-14)

sRNA\_AG01\_SoLexa\_Mi2008\_153\_14822\_hit2

5' GGACCAGGCUUCAUCCCCC  
|:|  
CCUGGUCCGAAGUAGGGUUA 5'

AT2G34710.1 869 887  
homeodomain transcription factor (ATHB-14)

sRNA\_AG01\_SoLexa\_Mi2008\_219\_8956\_hit2

5' CGGACCAGGCUUCAUCCCCC  
|:|  
GCCUGGUCCGAAGUAGGGUUA 5'

AT2G34710.1 869 888  
homeodomain transcription factor (ATHB-14)

sRNA\_AG01\_SoLexa\_Mi2008\_1063\_31727\_hit2

5' UCGGACCAGGCUUCAUCCCCC  
|:|  
GGCCUGGUCCGAAGUAGGGUUA 5'

AT2G34710.1 869 889  
homeodomain transcription factor (ATHB-14)

stems\_1sup\_AG01\_SoLexa\_Mi\_Cell\_2008\_hit\_target\_site.txt

SRNA\_AG01\_SoLexa\_Mi2008\_4\_8955\_hit2  
5' CGGACCAGGCUUCAUCCCC  
|  
GCCUGGUCCGAAGUAGGGU 5'  
AT2G34710.1 870 888  
homeodomain transcription factor (ATHB-14)

SRNA\_AG01\_SoLexa\_Mi2008\_8\_8960\_hit4  
5' CGGACCAGGCUUCAUCCCC  
|  
GCCUGGUCCGAAGU-AGGGUU 5'  
AT2G34710.1 870 889  
homeodomain transcription factor (ATHB-14)

SRNA\_AG01\_SoLexa\_Mi2008\_47\_31726\_hit2  
5' UCGGACCAGGCUUCAUCCCC  
:|  
GGCCUGGUCCGAAGUAGGGU 5'  
AT2G34710.1 870 889  
homeodomain transcription factor (ATHB-14)

SRNA\_AG01\_SoLexa\_Mi2008\_310\_14823\_hit7  
5' GGACCAGGCUUCAUCCCC  
|  
CCUGGUCCGAAGU-AGGGU 5'  
AT2G34710.1 871 888  
homeodomain transcription factor (ATHB-14)

SRNA\_AG01\_SoLexa\_Mi2008\_641\_8959\_hit7  
5' CGGACCAGGCUUCAUCCCC  
|  
GCCUGGUCCGAAGU-AGGGU 5'  
AT2G34710.1 871 889  
homeodomain transcription factor (ATHB-14)

SRNA\_AG01\_SoLexa\_Mi2008\_2\_31725\_hit2  
5' UCGGACCAGGCUUCAUCCC  
:|  
GGCCUGGUCCGAAGUAGGG 5'  
AT2G34710.1 871 889  
homeodomain transcription factor (ATHB-14)

SRNA\_AG01\_SoLexa\_Mi2008\_4138\_31731\_hit7  
5' UCGGACCAGGCUUCAUCCCC  
|  
CGCCUGGUCCGAAGU-AGGGU 5'  
AT2G34710.1 871 890  
homeodomain transcription factor (ATHB-14)

SRNA\_AG01\_SoLexa\_Mi2008\_1\_8958\_hit7  
5' CGGACCAGGCUUCAUCCC  
|  
GCCUGGUCCGAAGU-AGGG 5'  
AT2G34710.1 872 889  
homeodomain transcription factor (ATHB-14)

SRNA\_AG01\_SoLexa\_Mi2008\_15\_11085\_hit1  
5' CUCGGACCAGGCUUCAUCC  
:|  
AGGCCUGGUCCGAAGUAGG 5'  
AT2G34710.1 872 890  
homeodomain transcription factor (ATHB-14)

stems\_1sup\_AG01\_SoLexa\_Mi\_Cell\_2008\_hit\_target\_site.txt

SRNA\_AG01\_SoLexa\_Mi2008\_98\_31730\_hit7

```
5' UCGGACCAGGCUUCAUCC
   |||
   CGCCUGGUCCGAAGU-AGGG 5'
AT2G34710.1      872      890
homeodomain transcription factor (ATHB-14)
```

SRNA\_AG01\_SoLexa\_Mi2008\_1\_11087\_hit3

```
5' CUCGGACCAGGCUUCAUCC
   |||
   UCGCCUGGUCCGAAGU-AGGG 5'
AT2G34710.1      872      891
homeodomain transcription factor (ATHB-14)
```

SRNA\_AG01\_SoLexa\_Mi2008\_33\_15725\_hit3

```
5' GUCGGACCAGGCUUCAUCC
   : |||
   UCGCCUGGUCCGAAGU-AGGG 5'
AT2G34710.1      872      891
homeodomain transcription factor (ATHB-14)
```

SRNA\_AG01\_SoLexa\_Mi2008\_68\_49390\_hit1

```
5' UUCGGACCAGGCUUCAUCC
   |||
   UCGCCUGGUCCGAAGU-AGGG 5'
AT2G34710.1      872      891
homeodomain transcription factor (ATHB-14)
```

SRNA\_AG01\_SoLexa\_Mi2008\_6\_31729\_hit7

```
5' UCGGACCAGGCUUCAUCC
   |||
   CGCCUGGUCCGAAGU-AGG 5'
AT2G34710.1      873      890
homeodomain transcription factor (ATHB-14)
```

SRNA\_AG01\_SoLexa\_Mi2008\_1\_49389\_hit1

```
5' UUCGGACCAGGCUUCAUCC
   |||
   UCGCCUGGUCCGAAGU-AGG 5'
AT2G34710.1      873      891
homeodomain transcription factor (ATHB-14)
```

SRNA\_AG01\_SoLexa\_Mi2008\_1\_37677\_hit4

```
5' UGCAAAGACCAUCAUUAUG
   ||| ||| ||| ||| ||| :
   ACGUCCUGGUAGUUA-UAAU 5'
AT2G37130.1      1055     1074
putative peroxidase ATP2a
```

SRNA\_AG01\_SoLexa\_Mi2008\_1\_1352\_hit1

```
5' ACAGAAGAGAGAGAG-CACU
   ||| ||| ||| ||| |||
   UGUCUACUCUCUCAGUAA 5'
AT2G37130.2      481      500
putative peroxidase ATP2a
```

SRNA\_AG01\_SoLexa\_Mi2008\_1\_1352\_hit1

```
5' ACAGAAGAGAGAGAG-CACU
   ||| ||| ||| ||| |||
   UGUCUACUCUCUCAGUAA 5'
AT2G37130.1      581      600
putative peroxidase ATP2a
```

stems\_1sup\_AG01\_SoLexa\_Mi\_Cell\_2008\_hit\_target\_site.txt

SRNA\_AG01\_SoLexa\_Mi2008\_1\_37677\_hit4

5' UGCAAAGACCAUCAUGAUUG  
 ||||| ||||| ||||| |||||  
 ACGUCCUGGUAGUUA-UAAU 5'  
 AT2G37130.2 955 974  
 putative peroxidase ATP2a

SRNA\_AG01\_SoLexa\_Mi2008\_1\_10933\_hit5

5' CUCCUGAAUCUCCGACAA  
 ||||| | ||||| ||||| |||||  
 GAGGA-U-AGAAGGCUGUU 5'  
 AT2G37640.1 527 543  
 Expansin (AtEXPA3)

SRNA\_AG01\_SoLexa\_Mi2008\_2\_25192\_hit1

5' UAUCUUAUGCGUCCUAUCUCC  
 ||||| | ||||| ||||| |||||  
 UUAGAAUAGGGAGGAUAGAAGG 5'  
 AT2G37640.1 531 552  
 Expansin (AtEXPA3)

SRNA\_AG01\_SoLexa\_Mi2008\_4\_15695\_hit1

5' GUCGAGAAGAAUGAAAAGGU  
 ||||| ||||| ||||| |||||  
 CAGCUCUCCUACUUUGCCA 5'  
 AT2G37710.1 283 302  
 putative receptor-like protein kinase

SRNA\_AG01\_SoLexa\_Mi2008\_1\_1205\_hit1

5' AAUUGAAUGGACCUUUCUC  
 ||||| ||||| ||||| |||||  
 AGAACUUAACUGGAAAGAG 5'  
 AT2G37710.1 580 598  
 putative receptor-like protein kinase

SRNA\_AG01\_SoLexa\_Mi2008\_1\_174\_hit2

5' AAAAGAAGAAGAUAAAGCAUUAU  
 ||||| ||||| ||||| |||||  
 UUUUCUUCUUCUUUUUAGUAUC 5'  
 AT2G38290.1 1514 1535  
 putative ammonium transporter

SRNA\_AG01\_SoLexa\_Mi2008\_1\_174\_hit2

5' AAAAGAAGAAGAUAAAGCAUUAU  
 ||||| ||||| ||||| |||||  
 UUUUCUUCUUCUUUUUAGUAUC 5'  
 AT2G38290.2 1593 1614  
 putative ammonium transporter

SRNA\_AG01\_SoLexa\_Mi2008\_1\_17161\_hit1

5' UAACAAGACCGGCCACACAUC  
 ||||| ||||| ||||| |||||  
 AUUGUUCUGGACCG-UAUG-AG 5'  
 AT2G38290.2 194 213  
 putative ammonium transporter

SRNA\_AG01\_SoLexa\_Mi2008\_1\_4535\_hit1

5' CAAGAAAAACGAAGAUUUUAU  
 ||||| ||||| ||||| |||||  
 AUUCUUUUUUGCUU-UUAAUA 5'  
 AT2G38940.1 1802 1821  
 phosphate transporter (AtPT2)



stems\_1sup\_AG01\_SoLexa\_Mi\_Cell\_2008\_hit\_target\_site.txt

SRNA\_AG01\_SoLexa\_Mi2008\_2\_28315\_hit7

5' UCAGCCAUGGUGGUGUCU-UUA  
||| |  
AGUCGGUACCAACAUAGAUAAU 5'  
AT2G46420.2 1136 1157  
unknown protein

SRNA\_AG01\_SoLexa\_Mi2008\_2\_48750\_hit7

5' UUCAGCCAUGGUGGUGUCU-UUA  
||| |  
AAGUCGGUACCAACAUAGAUAAU 5'  
AT2G46420.2 1136 1158  
unknown protein

SRNA\_AG01\_SoLexa\_Mi2008\_1\_11854\_hit1

5' CUGGAAAA-AUAGGAGUGUUU  
|: ||||| |||  
GGACUUUUCUAUCCUCACAAA 5'  
AT2G46970.1 1216 1236  
PIF3 like basic Helix Loop Helix protein (PIL1)

SRNA\_AG01\_SoLexa\_Mi2008\_4\_36271\_hit2

5' UG-AGGAGACACCGGUGCCAAA  
|| |  
ACAUCCUCUGUGGCCA-GGUGU 5'  
AT2G47160.1 1093 1113  
putative anion exchange protein

SRNA\_AG01\_SoLexa\_Mi2008\_3\_14060\_hit2

5' GAGGAGACACCGGUGCCAA  
: ||||| |||  
UUCCUCUGUGGCCA-GGUG 5'  
AT2G47160.1 1094 1111  
putative anion exchange protein

SRNA\_AG01\_SoLexa\_Mi2008\_1\_11489\_hit2

5' CUG-AGGAGACACCGGUGCCA  
|| |  
AACAUCCUCUGUGGCCA-GGU 5'  
AT2G47160.1 1095 1114  
putative anion exchange protein

SRNA\_AG01\_SoLexa\_Mi2008\_2\_33399\_hit2

5' UCUG-AGGAGACACCGGUGCCA  
| || |  
AAACAUCCUCUGUGGCCA-GGU 5'  
AT2G47160.1 1095 1115  
putative anion exchange protein

SRNA\_AG01\_SoLexa\_Mi2008\_4\_36271\_hit2

5' UG-AGGAGACACCGGUGCCAAA  
|| |  
ACAUCCUCUGUGGCCA-GGUGU 5'  
AT2G47160.2 1172 1192  
putative anion exchange protein

SRNA\_AG01\_SoLexa\_Mi2008\_3\_14060\_hit2

5' GAGGAGACACCGGUGCCAA  
: ||||| |||  
UUCCUCUGUGGCCA-GGUG 5'  
AT2G47160.2 1173 1190  
putative anion exchange protein

stems\_1sup\_AG01\_SoLexa\_Mi\_Cell\_2008\_hit\_target\_site.txt

SRNA\_AG01\_SoLexa\_Mi2008\_1\_11489\_hit2

5' CUG-AGGAGACACCGGUGCCA  
|| |||||  
AACAUCCUCUGUGGCCA-GGU 5'  
AT2G47160.2 1174 1193  
putative anion exchange protein

SRNA\_AG01\_SoLexa\_Mi2008\_2\_33399\_hit2

5' UCUG-AGGAGACACCGGUGCCA  
| || |||||  
AAACAUCCUCUGUGGCCA-GGU 5'  
AT2G47160.2 1174 1194  
putative anion exchange protein

SRNA\_AG01\_SoLexa\_Mi2008\_1\_13420\_hit2

5' GAAGAAGAAGAAGACUCUU  
|||||  
CUUCUUCUUCUUCU-AGCU 5'  
AT2G47160.1 142 159  
putative anion exchange protein

SRNA\_AG01\_SoLexa\_Mi2008\_1\_13420\_hit2

5' GAAGAAGAAGAAGACUCUU  
|||||  
CUUCUUCUUCUUCU-AGCU 5'  
AT2G47160.2 146 163  
putative anion exchange protein

SRNA\_AG01\_SoLexa\_Mi2008\_3\_768\_hit1

5' AAGAAGAGAGAGAAUUG-AG  
||||| |||||  
UUCUUAUCUCUCUU-ACGUC 5'  
AT2G47160.1 185 203  
putative anion exchange protein

SRNA\_AG01\_SoLexa\_Mi2008\_3\_768\_hit1

5' AAGAAGAGAGAGAAUUG-AG  
||||| |||||  
UUCUUAUCUCUCUU-ACGUC 5'  
AT2G47160.2 189 207  
putative anion exchange protein

SRNA\_AG01\_SoLexa\_Mi2008\_7\_15838\_hit1

5' GUGAAGAUGAAGAAUAAUGUU  
|| |||||:|||||  
CA-UUCUACUUCUUGUUACAA 5'  
AT2G47510.2 1680 1699  
putative fumarase

SRNA\_AG01\_SoLexa\_Mi2008\_7\_15838\_hit1

5' GUGAAGAUGAAGAAUAAUGUU  
|| |||||:|||||  
CA-UUCUACUUCUUGUUACAA 5'  
AT2G47510.1 1736 1755  
putative fumarase

SRNA\_AG01\_SoLexa\_Mi2008\_1\_41846\_hit1

5' UGG-GAGCUGAGAGAA-ACGUCG  
||| |||||  
ACCUCUCGACUCUCUUCUGCUGC 5'  
AT2G47510.2 40 62  
putative fumarase

stems\_1sup\_AG01\_SoLexa\_Mi\_Cell\_2008\_hit\_target\_site.txt

SRNA\_AG01\_SoLexa\_Mi2008\_1\_41846\_hit1

5' UGG-GAGCUGAGAGAA-ACGUCG  
 ||| |||||  
 ACCUCUCGACUCUCUUCUGCUGC 5'  
 AT2G47510.1 84 106  
 putative fumarase

SRNA\_AG01\_SoLexa\_Mi2008\_1\_37225\_hit4

5' UGAUGAUGAUGAUGAUGAAGAAG  
 |||||:||||| |||||  
 CCUACUGCUACUUCUACUUCUUC 5'  
 AT3G01830.1 614 636  
 unknown protein

SRNA\_AG01\_SoLexa\_Mi2008\_6\_33450\_hit2

5' UCUGAUGGUGUGCAUCCCAAU  
 |||||:|||||  
 AGACUACCACAC-UCGGGUUG 5'  
 AT3G01970.1 737 756  
 putative WRKY-like transcriptional regulator protein

SRNA\_AG01\_SoLexa\_Mi2008\_1\_48488\_hit1

5' UUCAACUGCGGUAACAUCAGAU  
 :||||| |||||  
 GAGUUGACGCCAUUGAAGACUA 5'  
 AT3G04070.2 932 953  
 NAM-like protein (no apical meristem)

SRNA\_AG01\_SoLexa\_Mi2008\_1\_48488\_hit1

5' UUCAACUGCGGUAACAUCAGAU  
 :||||| |||||  
 GAGUUGACGCCAUUGAAGACUA 5'  
 AT3G04070.1 980 1001  
 NAM-like protein (no apical meristem)

SRNA\_AG01\_SoLexa\_Mi2008\_1\_4534\_hit3

5' CAAGA-A-AAAAAGAGAUGAG  
 ||||| | |||||  
 GUUCUCUAAAAUUCUCUACAC 5'  
 AT3G04520.1 14 34  
 L-allo-threonine aldolase like protein

SRNA\_AG01\_SoLexa\_Mi2008\_2\_6737\_hit1

5' CAG-UGGUGCUUCGGGUACUC  
 ||| || ||||| |||||  
 GUCUAC-ACGAAGCCCACUGAG 5'  
 AT3G04520.1 1 21  
 L-allo-threonine aldolase like protein

SRNA\_AG01\_SoLexa\_Mi2008\_2\_44800\_hit1

5' UGUCUACGU-UGAUGAUGUUGU  
 ||||| || |||||  
 ACAGAUGCAUA-UACUACAACC 5'  
 AT3G04520.1 965 985  
 L-allo-threonine aldolase like protein

SRNA\_AG01\_SoLexa\_Mi2008\_85\_22179\_hit1

5' UAGCCAAGGAUGACUUGCCUGU  
 |||||:||||| |||||  
 CUCGGUUUCUACUAAACGGACA 5'  
 AT3G05690.1 1181 1202  
 putative transcription factor

stems\_1sup\_AG01\_SoLexa\_Mi\_Cell\_2008\_hit\_target\_site.txt

SRNA\_AG01\_SoLexa\_Mi2008\_400\_22176\_hit7

5' UAGCCAAGGAUGACUUGCCUG  
 |||||:||||| |||||  
 CUCGGUUUCUACUAAACGGAC 5'  
 AT3G05690.1 1182 1202  
 putative transcription factor

SRNA\_AG01\_SoLexa\_Mi2008\_30\_36087\_hit4

5' UGAGCCAAGGAUGACUUGCCG  
 |||||:||||| |||||  
 ACUCGGUUUCUACUAAACGGA 5'  
 AT3G05690.1 1183 1203  
 putative transcription factor

SRNA\_AG01\_SoLexa\_Mi2008\_1\_1014\_hit1

5' AAU-AGCCAAGGAUGACUUGCCUG  
 ||| |||||:||||| |||||  
 UUACUCGGUUUCUACUAAACGGAC 5'  
 AT3G05690.1 1183 1206  
 putative transcription factor

SRNA\_AG01\_SoLexa\_Mi2008\_4\_36086\_hit4

5' UGAGCCAAGGAUGACUUGCC  
 |||||:||||| |||||  
 ACUCGGUUUCUACUAAACGG 5'  
 AT3G05690.1 1184 1203  
 putative transcription factor

SRNA\_AG01\_SoLexa\_Mi2008\_1\_3\_hit25

5' AAAAAAAAAAAAAAG-AAAGA  
 ||||| ||||| |||||  
 UUUUUU-UUUUUUCACUUCU 5'  
 AT3G07010.1 1515 1533  
 pectate lyase like protein

SRNA\_AG01\_SoLexa\_Mi2008\_1\_36258\_hit1

5' UGAGGA-CCAAAGAGUUGCUGA  
 ||||| ||||| |||||  
 ACUCCUCGGUU-CUCAACGACG 5'  
 AT3G08640.1 632 652  
 unknown protein

SRNA\_AG01\_SoLexa\_Mi2008\_1\_6861\_hit1

5' CAUACG-CUUGAUGGACAUGUU  
 ||||| ||||| |||||  
 GUAUACCGAACUACCUGU-CAA 5'  
 AT3G08640.1 677 697  
 unknown protein

SRNA\_AG01\_SoLexa\_Mi2008\_3\_15159\_hit2

5' GGGAUAAACAUCAUAGGAUU  
 |||||:||| |||||  
 CCCUAUUGUGGUACCCUAA 5'  
 AT3G08860.1 1005 1023  
 aminotransferase like protein

SRNA\_AG01\_SoLexa\_Mi2008\_3\_53977\_hit1

5' UUUAAAGGGUGCGGUGUAG-AGU  
 ||||| ||||| |||||  
 AAAUCCACACAACAUCUUCA 5'  
 AT3G08860.1 304 325  
 aminotransferase like protein

stems\_1sup\_AG01\_SoIexa\_Mi\_Cell\_2008\_hit\_target\_site.txt

SRNA\_AG01\_SoIexa\_Mi2008\_2\_14955\_hit1

5' GGCAGC-AGCUGAAGCAAGAGCA  
||||||| | |||||  
CCGUCGAU-GACUUCGUUGUCGU 5'

AT3G09200.2 826 847  
putative 60S acidic ribosomal protein P0

SRNA\_AG01\_SoIexa\_Mi2008\_2\_14955\_hit1

5' GGCAGC-AGCUGAAGCAAGAGCA  
||||||| | |||||  
CCGUCGAU-GACUUCGUUGUCGU 5'

AT3G09200.1 925 946  
putative 60S acidic ribosomal protein P0

SRNA\_AG01\_SoIexa\_Mi2008\_1\_1666\_hit1

5' ACGUUGUUCAGUAGCUGGUA  
|| ||| |||||  
UG-AACUAGUCAUCGACCAA 5'

AT3G10660.1 149 167  
calmodulin-domain protein kinase CDPK isoform 2

SRNA\_AG01\_SoIexa\_Mi2008\_17\_9865\_hit4

5' CUACAGAAACGGAUUUGAC  
|||||||:||||| ||  
GAUGUCUUUGUCUAAA-UG 5'

AT3G10660.1 2057 2074  
calmodulin-domain protein kinase CDPK isoform 2

SRNA\_AG01\_SoIexa\_Mi2008\_1\_2542\_hit2

5' AUAGAUUAACA-CCAGGAU  
||||||| | |||||  
UAUCUAUAUUGUAAG-CCUA 5'

AT3G10660.1 731 749  
calmodulin-domain protein kinase CDPK isoform 2

SRNA\_AG01\_SoIexa\_Mi2008\_1\_45296\_hit1

5' UGUGGAGUAAUUGAUGUUGUCC  
|||||||  
ACACCUCAUUAACUACAACAGG 5'

AT3G11680.1 1290 1311  
unknown protein

SRNA\_AG01\_SoIexa\_Mi2008\_1\_1310\_hit1

5' ACACAUCCCUUGUGGAGUAAU  
|||||||  
UGUGUAGGGGACACCUCAUUA 5'

AT3G11680.1 1301 1321  
unknown protein

SRNA\_AG01\_SoIexa\_Mi2008\_8\_49355\_hit1

5' UUCGCGUGGCCGUCGGUA  
|||||||  
AAGCGCCACCGGCAGCCAU 5'

AT3G11680.1 1405 1423  
unknown protein

SRNA\_AG01\_SoIexa\_Mi2008\_1\_20871\_hit4

5' UAGAAGAAAACCGCAGCG-GAC  
||||||| ||||| ||  
AUCUUCUUUUGCCGUCGUCUU 5'

AT3G13175.1 296 317  
unknown protein

stems\_1sup\_AG01\_SoLexa\_Mi\_Cell\_2008\_hit\_target\_site.txt

SRNA\_AG01\_SoLexa\_Mi2008\_1\_20872\_hit2

5' UAGAAGAAAACCGCAGCG-GAU  
| | | | | | | | | | | | | | | | | |  
AUCUUCUUUUGCCGUCGUCUU 5'  
AT3G13175.1 296 317  
unknown protein

SRNA\_AG01\_SoLexa\_Mi2008\_1\_4102\_hit1

5' CAAAGAUGGAGUGUAG-GAA  
| | | | | | | | | | | | | | | | | |  
GUUUCUACCUCACUUCUCUC 5'  
AT3G13175.1 74 93  
unknown protein

SRNA\_AG01\_SoLexa\_Mi2008\_1\_19217\_hit6

5' UA-CAAUGGUGAAGUGAGGU  
| | | | | | | | | | | | | | | | | |  
AUCGUUACCACUACACUCCC 5'  
AT3G15380.1 1381 1400  
unknown protein

SRNA\_AG01\_SoLexa\_Mi2008\_1\_24301\_hit71

5' UAUAAUA-CAAUGGUGAAGUGAG  
| | | | | | | | | | | | | | | | | |  
AUAU-AUCGUUACCACUACACUC 5'  
AT3G15380.1 1383 1404  
unknown protein

SRNA\_AG01\_SoLexa\_Mi2008\_1\_3901\_hit3

5' CAAAACG-AA-GAAGAUGAUGAG  
| | | | | | | | | | | | | | | | | |  
GUUUUCCGUUACUUCUACUACUC 5'  
AT3G15380.1 200 222  
unknown protein

SRNA\_AG01\_SoLexa\_Mi2008\_1\_4253\_hit1

5' CA-AAUGACGUGGUGCGUGCUG  
| | | | | | | | | | | | | | | | | |  
GUCUU-CUCCACCACGCACGAC 5'  
AT3G15380.1 2120 2140  
unknown protein

SRNA\_AG01\_SoLexa\_Mi2008\_1\_7584\_hit16

5' CCA-AAUGCAGAAACCCAUCUU  
| | | | | | | | | | | | | | | | | |  
UGUGUUACGUCUUUGGGU-GAA 5'  
AT3G16470.1 1557 1577  
putative lectin

SRNA\_AG01\_SoLexa\_Mi2008\_1\_7584\_hit16

5' CCA-AAUGCAGAAACCCAUCUU  
| | | | | | | | | | | | | | | | | |  
UGUGUUACGUCUUUGGGU-GAA 5'  
AT3G16470.2 1562 1582  
putative lectin

SRNA\_AG01\_SoLexa\_Mi2008\_1\_15600\_hit1

5' GUCAGAAAAUUAGAUUUU  
| | | | | | | | | | | | | | | | | |  
CAGUCUUUUAA--UAUAAA 5'  
AT3G17800.2 59 75  
unknown protein

stems\_1sup\_AG01\_SoLexa\_Mi\_Cell\_2008\_hit\_target\_site.txt

SRNA\_AG01\_SoLexa\_Mi2008\_5\_479\_hit1

5' AAAGGAAGAAGAUUUGG-AGUU  
||| |||||  
GUUC-UUCUUCUAUACCCUCAA 5'  
AT3G19100.1 131 151  
CDPK-related kinase

SRNA\_AG01\_SoLexa\_Mi2008\_4\_10938\_hit2

5' CUCCUUCU-GCAGUUGUAUGUU  
||| |||||  
UUGGAAGAACGUCAACAUACAA 5'  
AT3G19100.1 2046 2067  
CDPK-related kinase

SRNA\_AG01\_SoLexa\_Mi2008\_1\_32180\_hit1

5' UCGGGUUAAGUGGUAUGUGGU  
||| |||||  
AGCCCAAUUCACCAUACACCA 5'  
AT3G20810.3 50 70  
unknown protein

SRNA\_AG01\_SoLexa\_Mi2008\_1\_32180\_hit1

5' UCGGGUUAAGUGGUAUGUGGU  
||| |||||  
AGCCCAAUUCACCAUACACCA 5'  
AT3G20810.2 82 102  
unknown protein

SRNA\_AG01\_SoLexa\_Mi2008\_3\_4691\_hit4

5' CAAGAUGUUUUUCUUGUGG-GA  
||| |||||  
GUU-UACAAAAAGAACCACU 5'  
AT3G23250.2 229 249  
myb-related transcription factor like protein

SRNA\_AG01\_SoLexa\_Mi2008\_3\_4691\_hit4

5' CAAGAUGUUUUUCUUGUGG-GA  
||| |||||  
GUU-UACAAAAAGAACCACU 5'  
AT3G23250.1 230 250  
myb-related transcription factor like protein

SRNA\_AG01\_SoLexa\_Mi2008\_1\_23588\_hit1

5' UAGGUUUAGGUGGUAAUAAA  
||| |||||  
AUCCAAAUCGACCAACUUA 5'  
AT3G23250.1 635 655  
myb-related transcription factor like protein

SRNA\_AG01\_SoLexa\_Mi2008\_1\_23588\_hit1

5' UAGGUUUAGGUGGUAAUAAA  
||| |||||  
AUCCAAAUCGACCAACUUA 5'  
AT3G23250.2 713 733  
myb-related transcription factor like protein

SRNA\_AG01\_SoLexa\_Mi2008\_2\_35284\_hit4

5' UGACAGUGGCAGUAGUACAG  
||| |||||: ||| |||  
ACUGUCACCGUCGUA-GUC 5'  
AT3G23550.1 1438 1456  
unknown protein

stems\_1sup\_AG01\_SoIexa\_Mi\_Cell\_2008\_hit\_target\_site.txt

SRNA\_AG01\_SoIexa\_Mi2008\_13\_7081\_hit3

5' CAUCUCAUGCCGAAUU-GUCCUA  
|||||  
AUAGAGUACGGCUUACGCAGGAU 5'

AT3G24660.1 1327 1349  
putative kinase-like protein TMKL1 precursor

SRNA\_AG01\_SoIexa\_Mi2008\_1\_48336\_hit1

5' UUAUUAGUCUAAUUGU-GUGA  
:|||||:|||||  
GAUAAUCAGGUAACACCACU 5'

AT3G24660.1 318 337  
putative kinase-like protein TMKL1 precursor

SRNA\_AG01\_SoIexa\_Mi2008\_1\_46521\_hit1

5' UUAAGA-UCAGGAAACUCAU  
|||||:|||||  
AAUU-UGAGUCCUUUGAGUG 5'

AT3G24660.1 703 721  
putative kinase-like protein TMKL1 precursor

SRNA\_AG01\_SoIexa\_Mi2008\_7\_353\_hit2

5' AAAGAAGAAGAUAAAGCAU  
|||||  
UUUCUUCUUCUA-UU-GUA 5'

AT3G24660.1 94 110  
putative kinase-like protein TMKL1 precursor

SRNA\_AG01\_SoIexa\_Mi2008\_1\_173\_hit2

5' AAAAGAAGAAGAUAAAGCAU  
|||||  
CUUUCUUCUUCUA-UU-GUA 5'

AT3G24660.1 94 111  
putative kinase-like protein TMKL1 precursor

SRNA\_AG01\_SoIexa\_Mi2008\_1\_4774\_hit23

5' CAAGCUGCAGAAGUGG-UGCAA  
|||||  
GUUCGUCGUCUUCACCGACGUC 5'

AT3G25890.2 1244 1265  
unknown protein

SRNA\_AG01\_SoIexa\_Mi2008\_2\_4775\_hit6

5' CAAGCUGCAGAAGUGG-UGCAA  
|||||  
GUUCGUCGUCUUCACCGACGUC 5'

AT3G25890.2 1244 1265  
unknown protein

SRNA\_AG01\_SoIexa\_Mi2008\_1\_173\_hit2

5' AA-AAGAAGAAGAUAAAGCAU  
|||  
UUCUUCUUCUUCUAAUUCU 5'

AT3G25890.2 156 176  
unknown protein

SRNA\_AG01\_SoIexa\_Mi2008\_1\_172\_hit2

5' AA-AAGAAGAAGAUAAAGCA  
|||  
UUCUUCUUCUUCUAAUUCU 5'

AT3G25890.2 157 176  
unknown protein

stems\_1sup\_AG01\_SoLexa\_Mi\_Cell\_2008\_hit\_target\_site.txt

SRNA\_AG01\_SoLexa\_Mi2008\_1\_4774\_hit23

5' CAAGCUGCAGAAGUGG-UGCAA  
 ||||| |||||  
 GUUCGUCGUCUUCACCGACGUC 5'  
 AT3G25890.1 919 940  
 unknown protein

SRNA\_AG01\_SoLexa\_Mi2008\_2\_4775\_hit6

5' CAAGCUGCAGAAGUGG-UGCAU  
 ||||| |||||  
 GUUCGUCGUCUUCACCGACGUC 5'  
 AT3G25890.1 919 940  
 unknown protein

SRNA\_AG01\_SoLexa\_Mi2008\_2\_16789\_hit1

5' UAAAGCUGGUGGUGUUU-ACU  
 ||||| ||| ||| |||  
 AUUUCGACCAACACAAAUUUGA 5'  
 AT3G26380.1 1508 1529  
 unknown protein

SRNA\_AG01\_SoLexa\_Mi2008\_1\_379\_hit1

5' AAAGAGA-AGUAUGAAAACUCA  
 ||||| | ||||| |||||  
 UUUCU-UGUCAUACUGUUGAGU 5'  
 AT3G28600.1 1134 1154  
 unknown protein

SRNA\_AG01\_SoLexa\_Mi2008\_4\_13685\_hit6

5' GACCAUAUGGACAAUGGGC  
 :||| |||||  
 UUGGAAUACCGUUACCCU 5'  
 AT3G28740.1 1491 1509  
 cytochrome P450 like protein

SRNA\_AG01\_SoLexa\_Mi2008\_3\_768\_hit1

5' AAGAAGAGAGAGAAUUGAG  
 |||| | ||||| |||  
 UUCU-CUCUCUCUUA-UC 5'  
 AT3G28740.1 38 54  
 cytochrome P450 like protein

SRNA\_AG01\_SoLexa\_Mi2008\_8\_4655\_hit1

5' CAAGAGUGUUUGAGAGAU  
 ||||| || |||||  
 GUUCUCA-AA-CUCUCUAU 5'  
 AT3G28740.1 72 88  
 cytochrome P450 like protein

SRNA\_AG01\_SoLexa\_Mi2008\_1\_13420\_hit2

5' GAAGAAGAAGAAGACUCUU  
 ||||| ||||| | |||  
 CUUCUUCUUCUUCU-A-AA 5'  
 AT3G29000.1 22 38  
 unknown protein

SRNA\_AG01\_SoLexa\_Mi2008\_3\_21212\_hit1

5' UAGAGAGAGAAAAAGAUGGC  
 :||| |||||  
 GUCUCUCUCUUUCUCUACCA 5'  
 AT3G30180.1 55 74  
 cytochrome P450 homolog, putative

stems\_1sup\_AG01\_SoLexa\_Mi\_Cell\_2008\_hit\_target\_site.txt

SRNA\_AG01\_SoLexa\_Mi2008\_1\_18666\_hit1

5' UAAUCAGAGAGAGAAAGAGGAU  
 ||| |||||  
 AUU-GUCUCUCUCUUUCUC-UA 5'

AT3G30180.1 59 78  
 cytochrome P450 homolog, putative

SRNA\_AG01\_SoLexa\_Mi2008\_2\_411\_hit5

5' AAAGAUGAAGAGAGAAAGAGA  
 ||| | || |||||  
 UUUU-GU-CUCUCUUUCUCU 5'

AT3G30180.1 60 78  
 cytochrome P450 homolog, putative

SRNA\_AG01\_SoLexa\_Mi2008\_3\_23318\_hit2

5' UAG-GUAAAAACAUCUGGUCUA  
 ||| ||||| |||||  
 AUCACAUUUU-GUAGACCAGAG 5'

AT3G44300.1 961 981  
 nitrilase 2

SRNA\_AG01\_SoLexa\_Mi2008\_3\_23318\_hit2

5' UAG-GUAAAAACAUCUGGUCUA  
 ||| ||||| |||||  
 AUCACAUUUU-GUAGACCAGAG 5'

AT3G44310.2 861 881  
 nitrilase 1

SRNA\_AG01\_SoLexa\_Mi2008\_3\_23318\_hit2

5' UAG-GUAAAAACAUCUGGUCUA  
 ||| ||||| |||||  
 AUCACAUUUU-GUAGACCAGAG 5'

AT3G44310.3 979 999  
 nitrilase 1

SRNA\_AG01\_SoLexa\_Mi2008\_1\_29347\_hit1

5' UCCACCACUUUCUAGCCUUA  
 ||||| |||||  
 CGGUGGU-AAAGAAUCGGAU 5'

AT3G46610.1 1430 1449  
 unknown protein

SRNA\_AG01\_SoLexa\_Mi2008\_2\_26842\_hit13

5' UCAACAACUGCAGCCAUUGU-GU  
 |||| ||||| |||||  
 AGUU-UUGACUUCGGUAACAACA 5'

AT3G46610.1 1848 1869  
 unknown protein

SRNA\_AG01\_SoLexa\_Mi2008\_1\_3\_hit25

5' AAAAAAAAAAAAAAGAAAGA  
 ||||| |||||  
 GUUUUUUUUUUUUCUGUCU 5'

AT3G48740.1 1193 1211  
 MTN3-like protein

SRNA\_AG01\_SoLexa\_Mi2008\_1\_1352\_hit1

5' ACAGAAGAGAGAGAGCACU  
 ||||| |||||  
 CUUCUUCUCUAUCGUGA 5'

AT3G48740.1 47 65  
 MTN3-like protein

stems\_1sup\_AG01\_SoLexa\_Mi\_Cell\_2008\_hit\_target\_site.txt

SRNA\_AG01\_SoLexa\_Mi2008\_1\_13615\_hit4

5' GACAGAAGAGAGAGAGCAC  
|| |||||  
CU-UCUUCUCUCUAUCGUGA 5'  
AT3G48740.1 48 66  
MTN3-like protein

SRNA\_AG01\_SoLexa\_Mi2008\_1\_13614\_hit8

5' GACAGAAGAGAGAGAGCAC  
|| |||||  
CU-UCUUCUCUCUAUCGUG 5'  
AT3G48740.1 49 66  
MTN3-like protein

SRNA\_AG01\_SoLexa\_Mi2008\_12\_35237\_hit8

5' UGACAGAAGAGAGAGAGCAC  
||| |||||  
ACU-UCUUCUCUCUAUCGUG 5'  
AT3G48740.1 49 67  
MTN3-like protein

SRNA\_AG01\_SoLexa\_Mi2008\_7\_9719\_hit1

5' CUAAG-UUCAACAUUCGACG  
||| | |||||  
GAU-CGAAGUUGUAUAGCUCC 5'  
AT3G48740.1 803 822  
MTN3-like protein

SRNA\_AG01\_SoLexa\_Mi2008\_1\_49818\_hit1

5' UUCUGGUGUUCAUGAUUUUCA  
||| | | |||||  
AAG-C-AGAAGUACUAAAAGU 5'  
AT3G50280.1 240 258  
anthranilate N-hydroxycinnamoyl/benzoyltransferase - like protein

SRNA\_AG01\_SoLexa\_Mi2008\_56\_12285\_hit1

5' CUGUUGCUGCAUGUGCUGU-UU  
|||||  
UACAACGACGUACACCACACAA 5'  
AT3G50440.1 128 149  
unknown protein

SRNA\_AG01\_SoLexa\_Mi2008\_6\_5721\_hit1

5' CACGUGGACAAAGA-GAAGC  
| |||||  
GCGCACCUGUUUCUGCUUCA 5'  
AT3G50440.1 160 179  
unknown protein

SRNA\_AG01\_SoLexa\_Mi2008\_1\_21351\_hit8

5' UAGAGGAAAUGAGUGUGUUAUCC  
||||:|||||  
AUCUUCUUUACUCACACAAUAAGG 5'  
AT3G50480.1 1006 1029  
RPW8- like protein 4 (HR4)

SRNA\_AG01\_SoLexa\_Mi2008\_1\_21350\_hit1

5' UAGAGGAAAUGAGUGUGAUUAU  
||||:|||||  
AUCUUCUUUACUCACACAAUA 5'  
AT3G50480.1 1009 1029  
RPW8- like protein 4 (HR4)



stems\_1sup\_AG01\_SoIexa\_Mi\_Cell\_2008\_hit\_target\_site.txt

SRNA\_AG01\_SoIexa\_Mi2008\_2\_42236\_hit1

5' UGGGCUUAGAUGAUGGACCUU  
|||||  
ACCCGAAUCUACUACCCGGAA 5'  
AT3G50480.1 918 938  
RPW8- like protein 4 (HR4)

SRNA\_AG01\_SoIexa\_Mi2008\_2\_42238\_hit4

5' UGGGCUUAGAUGAUGGGUCUU  
|||||:||||  
ACCCGAAUCUACUACCCGGAA 5'  
AT3G50480.1 918 938  
RPW8- like protein 4 (HR4)

SRNA\_AG01\_SoIexa\_Mi2008\_2\_42237\_hit4

5' UGGGCUUAGAUGAUGGGUCU  
|||||:|||  
ACCCGAAUCUACUACCCGGA 5'  
AT3G50480.1 919 938  
RPW8- like protein 4 (HR4)

SRNA\_AG01\_SoIexa\_Mi2008\_1\_14303\_hit4

5' GAUGGGCUUAGAUGAUGGGUCU  
|||||:|||  
CUACCCGAAUCUACUACCCGGA 5'  
AT3G50480.1 919 940  
RPW8- like protein 4 (HR4)

SRNA\_AG01\_SoIexa\_Mi2008\_4\_37363\_hit4

5' UGAUGGGCUUAGAUGAUGGGU  
|||||:  
ACUACCCGAAUCUACUACCCG 5'  
AT3G50480.1 921 941  
RPW8- like protein 4 (HR4)

SRNA\_AG01\_SoIexa\_Mi2008\_1\_37364\_hit1

5' UGAUGGGCUUAGAUGAUUGGC  
||||| |||  
ACUACCCGAAUCUACU-ACCC 5'  
AT3G50480.1 923 942  
RPW8- like protein 4 (HR4)

SRNA\_AG01\_SoIexa\_Mi2008\_3\_14257\_hit30

5' GAUGAUGGGCUUAGAUGAU  
|||||  
CUACUACCCGAAUCUACUA 5'  
AT3G50480.1 925 943  
RPW8- like protein 4 (HR4)

SRNA\_AG01\_SoIexa\_Mi2008\_1\_21813\_hit1

5' UAGAUGAUGGACUUCGAUGAU  
||||| ||| |||||  
AUCUACUACCCGAAUCUACUA 5'  
AT3G50480.1 925 945  
RPW8- like protein 4 (HR4)

SRNA\_AG01\_SoIexa\_Mi2008\_6\_21815\_hit1

5' UAGAUGAUGGGCUUAAAUGAU  
||||| |||||  
AUCUACUACCCGAAUCUACUA 5'  
AT3G50480.1 925 945  
RPW8- like protein 4 (HR4)

stems\_1sup\_AG01\_SoIexa\_Mi\_Cell\_2008\_hit\_target\_site.txt

SRNA\_AG01\_SoIexa\_Mi2008\_5\_21816\_hit30

5' UAGAUGAUGGGCUUAGAUGAU  
|||||  
AUCUACUACCCGAAUCUACUA 5'  
AT3G50480.1 925 945  
RPW8- like protein 4 (HR4)

SRNA\_AG01\_SoIexa\_Mi2008\_1\_21817\_hit1

5' UAGAUGAUGGGUUUAGAUGAU  
|||||:|||||  
AUCUACUACCCGAAUCUACUA 5'  
AT3G50480.1 925 945  
RPW8- like protein 4 (HR4)

SRNA\_AG01\_SoIexa\_Mi2008\_1\_10162\_hit2

5' CUAGAUGAUGGACUAGAUGA  
||||| |||||  
GAUCUACUACCCGAAUCUACU 5'  
AT3G50480.1 926 946  
RPW8- like protein 4 (HR4)

SRNA\_AG01\_SoIexa\_Mi2008\_6\_10164\_hit27

5' CUAGAUGAUGGGCUUAGAUGA  
|||||  
GAUCUACUACCCGAAUCUACU 5'  
AT3G50480.1 926 946  
RPW8- like protein 4 (HR4)

SRNA\_AG01\_SoIexa\_Mi2008\_1\_32880\_hit27

5' UCUAGAUGAUGGGCUUAGAUGA  
|||||  
AGAUCUACUACCCGAAUCUACU 5'  
AT3G50480.1 926 947  
RPW8- like protein 4 (HR4)

SRNA\_AG01\_SoIexa\_Mi2008\_7\_10163\_hit27

5' CUAGAUGAUGGGCUUAGAUG  
|||||  
GAUCUACUACCCGAAUCUAC 5'  
AT3G50480.1 927 946  
RPW8- like protein 4 (HR4)

SRNA\_AG01\_SoIexa\_Mi2008\_2\_32879\_hit27

5' UCUAGAUGAUGGGCUUAGAUG  
|||||  
AGAUCUACUACCCGAAUCUAC 5'  
AT3G50480.1 927 947  
RPW8- like protein 4 (HR4)

SRNA\_AG01\_SoIexa\_Mi2008\_1\_20757\_hit22

5' UAGAAACAUCUAGAUGAUGGGCUU  
|||||  
AUCUUUGUAGAUCUACUACCCGAA 5'  
AT3G50480.1 932 955  
RPW8- like protein 4 (HR4)

SRNA\_AG01\_SoIexa\_Mi2008\_1\_19030\_hit3

5' UACAAACAUCUAGAUGAUGGGCU  
|| |||||  
AUCUUUGUAGAUCUACUACCCGA 5'  
AT3G50480.1 933 955  
RPW8- like protein 4 (HR4)

stems\_1sup\_AG01\_SoIexa\_Mi\_Cell\_2008\_hit\_target\_site.txt

SRNA\_AG01\_SoIexa\_Mi2008\_5\_10081\_hit25

5' CUAGAAACAUCUAGAUGAUGG  
|||||  
GAUCUUUGUAGAUCUACUACC 5'  
AT3G50480.1 936 956  
RPW8- like protein 4 (HR4)

SRNA\_AG01\_SoIexa\_Mi2008\_4\_14880\_hit24

5' GGAGUACAAGGAAAGGGUA  
|||||  
CCUCAUGUCCUUUCCCAU 5'  
AT3G50480.1 962 980  
RPW8- like protein 4 (HR4)

SRNA\_AG01\_SoIexa\_Mi2008\_1\_23502\_hit2

5' UAGGUGUACAAGGAAAGGGUA  
|||||  
AUCCUCAUGUCCUUUCCCAU 5'  
AT3G50480.1 962 982  
RPW8- like protein 4 (HR4)

SRNA\_AG01\_SoIexa\_Mi2008\_5\_24584\_hit2

5' UAUAGGUGUACAAGGAAAGGGU  
|||||  
AUAUCCUCAUGUCCUUUCCCA 5'  
AT3G50480.1 963 984  
RPW8- like protein 4 (HR4)

SRNA\_AG01\_SoIexa\_Mi2008\_1\_22768\_hit2

5' UAGGAGUACAAGGAAAAGGGU  
|||||  
AUCCUCAUGUCCUU-UCCCA 5'  
AT3G50480.1 964 983  
RPW8- like protein 4 (HR4)

SRNA\_AG01\_SoIexa\_Mi2008\_1\_2590\_hit4

5' AUAGGAGUACAAGGAAAAGG  
|||||  
UAUCCUCAUGUCCUU-UCC 5'  
AT3G50480.1 966 984  
RPW8- like protein 4 (HR4)

SRNA\_AG01\_SoIexa\_Mi2008\_1\_54542\_hit29

5' UUUUAUAUAGGAGUACAAGGAA  
|||||  
AAAUUAUCCUCAUGUCCUU 5'  
AT3G50480.1 968 988  
RPW8- like protein 4 (HR4)

SRNA\_AG01\_SoIexa\_Mi2008\_1\_35975\_hit2

5' UGAGAUGAGUGACCAUGGCUGU  
|||||  
ACUCUACUAACCGGUACCGACG 5'  
AT3G50930.1 1239 1260  
BCS1 protein-like protein

SRNA\_AG01\_SoIexa\_Mi2008\_2\_35974\_hit2

5' UGAGAUGAGUGACCAUGGCU  
|||||  
ACUCUACUAACCGGUACCGA 5'  
AT3G50930.1 1241 1260  
BCS1 protein-like protein

stems\_1sup\_AG01\_SoLexa\_Mi\_Cell\_2008\_hit\_target\_site.txt

SRNA\_AG01\_SoLexa\_Mi2008\_1\_24431\_hit2

5' UUAU-GACAUGUGGAUGAUGCAC  
 ||||| |||||  
 AUAUGCUGUACACCUAC-ACGUA 5'  
 AT3G50930.1 1585 1606  
 BCS1 protein-like protein

SRNA\_AG01\_SoLexa\_Mi2008\_6\_24430\_hit2

5' UUAU-GACAUGUGGAUGAUGCA  
 ||||| |||||  
 AUAUGCUGUACACCUAC-ACGU 5'  
 AT3G50930.1 1586 1606  
 BCS1 protein-like protein

SRNA\_AG01\_SoLexa\_Mi2008\_1\_24432\_hit1

5' UUAU-GACAUGUGGAUGAUGC  
 ||||| |||||  
 AUAUGCUGUACACCUAC-ACGU 5'  
 AT3G50930.1 1586 1606  
 BCS1 protein-like protein

SRNA\_AG01\_SoLexa\_Mi2008\_23\_6153\_hit2

5' CAGAUCUUGGUGG-UAG-UAGC  
 ||||| |||||  
 GUCUAGAACCACCGAUCUAUCC 5'  
 AT3G50930.1 671 692  
 BCS1 protein-like protein

SRNA\_AG01\_SoLexa\_Mi2008\_1\_11865\_hit1

5' CUGGAAAUUGACGCC-UUCU  
 ||||| |||||  
 GACCUUAAACUGCGGUAACA 5'  
 AT3G50930.1 785 804  
 BCS1 protein-like protein

SRNA\_AG01\_SoLexa\_Mi2008\_3\_6076\_hit1

5' CA-GAGGGAGAUGAAAGAAUU  
 || | ||||| |||||  
 GUAC-CCCUCUAAUUUCUUA 5'  
 AT3G55970.1 377 396  
 leucoanthocyanidin dioxygenase -like protein

SRNA\_AG01\_SoLexa\_Mi2008\_1\_42962\_hit1

5' UGGUAGUAGAGAUAAUAGUUAU  
 |||||:| |||||  
 ACCAUUACCUCUAAUUAUCAUC 5'  
 AT3G55970.1 491 511  
 leucoanthocyanidin dioxygenase -like protein

SRNA\_AG01\_SoLexa\_Mi2008\_7\_14062\_hit1

5' GAGGAGGAGGAGGUGAACA  
 ||||| |||||  
 CUCCUCCUCCUCCUCUUCU 5'  
 AT3G56090.1 121 139  
 unknown protein

SRNA\_AG01\_SoLexa\_Mi2008\_3\_12720\_hit1

5' CUUGAAACAGGAGAUAGAGUUU  
 ||||| ||||| | |||||  
 GAACUUUGGCCUCUA-C-CAAA 5'  
 AT3G56710.1 109 128  
 SigA binding protein

stems\_1sup\_AG01\_SoLexa\_Mi\_Cell\_2008\_hit\_target\_site.txt

SRNA\_AG01\_SoLexa\_Mi2008\_6\_28221\_hit36

5' UCAGAUGUUUACAUGUGUCA  
|||||||  
AGUCUACAAAUUACACACA 5'  
AT3G56710.1 16 35  
SigA binding protein

SRNA\_AG01\_SoLexa\_Mi2008\_2\_13688\_hit1

5' GACCAUUUGUGAGAAGAGA  
|||||||  
CUGGUAAACACUCUUCUCU 5'  
AT3G57230.2 585 603  
MADS-box transcription factor (AGL16)

SRNA\_AG01\_SoLexa\_Mi2008\_596\_13689\_hit1

5' GACCAUUUGUGAGAAGGGA  
|||||||:|  
CUGGUAAACACUCUUCUCU 5'  
AT3G57230.2 585 603  
MADS-box transcription factor (AGL16)

SRNA\_AG01\_SoLexa\_Mi2008\_72\_1853\_hit1

5' AGACCAUUUGUGAGAAGGGA  
|||||||:|  
UCUGGUAAACACUCUUCUCU 5'  
AT3G57230.2 585 604  
MADS-box transcription factor (AGL16)

SRNA\_AG01\_SoLexa\_Mi2008\_3321\_21060\_hit1

5' UAGACCAUUUGUGAGAAGGGA  
|||||||:|  
AUCUGGUAAACACUCUUCUCU 5'  
AT3G57230.2 585 605  
MADS-box transcription factor (AGL16)

SRNA\_AG01\_SoLexa\_Mi2008\_2\_10113\_hit1

5' CUAGACCAUUUGUGAGAAGGGA  
|||||||:|  
GAUCUGGUAAACACUCUUCUCU 5'  
AT3G57230.2 585 606  
MADS-box transcription factor (AGL16)

SRNA\_AG01\_SoLexa\_Mi2008\_32\_21059\_hit1

5' UAGACCAUUUGUGAGAAGGG  
|||||||:|  
AUCUGGUAAACACUCUUCUC 5'  
AT3G57230.2 586 605  
MADS-box transcription factor (AGL16)

SRNA\_AG01\_SoLexa\_Mi2008\_37\_21058\_hit1

5' UAGACCAUUUGUGAGAAGG  
|||||||:  
AUCUGGUAAACACUCUUCUC 5'  
AT3G57230.2 587 605  
MADS-box transcription factor (AGL16)

SRNA\_AG01\_SoLexa\_Mi2008\_2\_13688\_hit1

5' GACCAUUUGUGAGAAGAGA  
|||||||  
CUGGUAAACACUCUUCUCU 5'  
AT3G57230.1 588 606  
MADS-box transcription factor (AGL16)

stems\_1sup\_AG01\_SoLexa\_Mi\_Cell\_2008\_hit\_target\_site.txt

SRNA\_AG01\_SoLexa\_Mi2008\_596\_13689\_hit1

5' GACCAUUUGUGAGAAGGGA  
|||||  
CUGGUAAACACUCUUCUCU 5'  
AT3G57230.1 588 606  
MADS-box transcription factor (AGL16)

SRNA\_AG01\_SoLexa\_Mi2008\_72\_1853\_hit1

5' AGACCAUUUGUGAGAAGGGA  
|||||  
UCUGGUAAACACUCUUCUCU 5'  
AT3G57230.1 588 607  
MADS-box transcription factor (AGL16)

SRNA\_AG01\_SoLexa\_Mi2008\_3321\_21060\_hit1

5' UAGACCAUUUGUGAGAAGGGA  
|||||  
AUCUGGUAAACACUCUUCUCU 5'  
AT3G57230.1 588 608  
MADS-box transcription factor (AGL16)

SRNA\_AG01\_SoLexa\_Mi2008\_2\_10113\_hit1

5' CUAGACCAUUUGUGAGAAGGGA  
|||||  
GAUCUGGUAAACACUCUUCUCU 5'  
AT3G57230.1 588 609  
MADS-box transcription factor (AGL16)

SRNA\_AG01\_SoLexa\_Mi2008\_32\_21059\_hit1

5' UAGACCAUUUGUGAGAAGGG  
|||||  
AUCUGGUAAACACUCUUCUC 5'  
AT3G57230.1 589 608  
MADS-box transcription factor (AGL16)

SRNA\_AG01\_SoLexa\_Mi2008\_37\_21058\_hit1

5' UAGACCAUUUGUGAGAAGG  
|||||  
AUCUGGUAAACACUCUUCUC 5'  
AT3G57230.1 590 608  
MADS-box transcription factor (AGL16)

SRNA\_AG01\_SoLexa\_Mi2008\_15\_2751\_hit1

5' AUCAAAAUCUG-UGGUGAGGCU  
||||| || || ||  
UAGUUGUA-ACCACCACUCCGA 5'  
AT3G57260.1 58 78  
beta-1,3-glucanase 2 (BG2)

SRNA\_AG01\_SoLexa\_Mi2008\_1\_14019\_hit1

5' GAGCUCCUUGAAGUCAAUG  
||| ||  
CUCAAGGAACUUAAGUCC 5'  
AT3G58780.2 697 716  
shatterproof 1 (SHP1)/ agamous -like 1 (AGL1)

SRNA\_AG01\_SoLexa\_Mi2008\_271\_14020\_hit1

5' GAGCUCCUUGAAGUCAAUGG  
||| ||  
CUCAAGGAACUUAAGUU-CC 5'  
AT3G58780.2 698 717  
shatterproof 1 (SHP1)/ agamous -like 1 (AGL1)

stems\_1sup\_AG01\_SoLexa\_Mi\_Cell\_2008\_hit\_target\_site.txt

SRNA\_AG01\_SoLexa\_Mi2008\_1\_14019\_hit1

```
5' GAGCUCCUUGAAGUCAAUG
   ||| ||||||||||||||||| |
   CUCAAGGAACUUCAAGUCC 5'
AT3G58780.1    718    737
shatterproof 1 (SHP1)/ agamous -like 1 (AGL1)
```

SRNA\_AG01\_SoLexa\_Mi2008\_271\_14020\_hit1

```
5' GAGCUCCUUGAAGUCAAUG
   ||| ||||||||||||||||| ||
   CUCAAGGAACUUCAAGUU-CC 5'
AT3G58780.1    719    738
shatterproof 1 (SHP1)/ agamous -like 1 (AGL1)
```

SRNA\_AG01\_SoLexa\_Mi2008\_1\_52192\_hit1

```
5' UUGGAUCAACAAACUGAUGG
   ||||| ||||| ||
   AACCUAGUUCUUUGAC-ACA 5'
AT3G59900.1     35     53
putative protein
```

SRNA\_AG01\_SoLexa\_Mi2008\_1\_18400\_hit1

```
5' UAAGGUUCGUUGAUUGUUGUC
   |||||||||||||||||||
   AUUCCAAGCAACUAACAACAG 5'
AT3G60140.1    647    667
beta-glucosidase
```

SRNA\_AG01\_SoLexa\_Mi2008\_1\_24287\_hit1

```
5' UAUAAGGUUCGUUGAUUGUUGUC
   |||||||||||||||||||
   AUAUCCAAGCAACUAACAACAG 5'
AT3G60140.1    647    669
beta-glucosidase
```

SRNA\_AG01\_SoLexa\_Mi2008\_2\_44860\_hit1

```
5' UGUCUUUAGAGAUCUCAAACGU
   ||||| ||||| ||||| ||
   ACAGAAAACUCUAAAGUUU-CA 5'
AT3G60140.1     6     26
beta-glucosidase
```

SRNA\_AG01\_SoLexa\_Mi2008\_2\_32161\_hit1

```
5' UCGGGUCGGGUACGAUGUGUA
   |||||||||||||||||||
   AGCCCAGCCCAUGCUACACAU 5'
AT3G61460.1    224    244
RING finger protein
```

SRNA\_AG01\_SoLexa\_Mi2008\_60\_9189\_hit1

```
5' CGGGUAAUUCGGGUCGAGUA
   ||||||||||||||||| |||
   GCCCAUAAGCCCAGCCCAU 5'
AT3G61460.1    233    251
RING finger protein
```

SRNA\_AG01\_SoLexa\_Mi2008\_1\_54911\_hit1

```
5' UUUCGGGUAAUUCGGGUCGGGUA
   |||||||||||||||||||
   AAAGCCCAUAAGCCCAGCCCAU 5'
AT3G61460.1    233    254
RING finger protein
```

stems\_1sup\_AG01\_SoLexa\_Mi\_Cell\_2008\_hit\_target\_site.txt

SRNA\_AG01\_SoLexa\_Mi2008\_16\_36152\_hit1

5' UGAGCGGGUUUCGGGUAUUCG  
|||||  
ACUCGCCCAAAGCCCAUAAGC 5'  
AT3G61460.1 242 262  
RING finger protein

SRNA\_AG01\_SoLexa\_Mi2008\_3\_8682\_hit1

5' CGAGU-UUCUACAGAGUGGACA  
|| || |||||:|||||  
GC-CACAAGAUGUUUCACCUGU 5'  
AT3G61460.1 468 488  
RING finger protein

SRNA\_AG01\_SoLexa\_Mi2008\_1\_29196\_hit2

5' UCCAAAGGGAUCGCAUUGUUU  
|||||:|  
AGGUUCCCUAGCGUAACAGA 5'  
AT3G62980.1 1710 1730  
transport inhibitor response 1 (TIR1)

SRNA\_AG01\_SoLexa\_Mi2008\_1\_29193\_hit2

5' UCCAAAGGGAUCGCAUUGAU  
|||||:  
AGGUUCCCUAGCGUAACAG 5'  
AT3G62980.1 1711 1730  
transport inhibitor response 1 (TIR1)

SRNA\_AG01\_SoLexa\_Mi2008\_14\_29195\_hit2

5' UCCAAAGGGAUCGCAUUGAUCC  
||||| ||  
AGGUUCCCUAGCGUAAC-AGA 5'  
AT3G62980.1 1711 1731  
transport inhibitor response 1 (TIR1)

SRNA\_AG01\_SoLexa\_Mi2008\_23\_29194\_hit2

5' UCCAAAGGGAUCGCAUUGAUC  
||||| ||  
AGGUUCCCUAGCGUAAC-AG 5'  
AT3G62980.1 1712 1731  
transport inhibitor response 1 (TIR1)

SRNA\_AG01\_SoLexa\_Mi2008\_2\_36207\_hit1

5' UGAGCUUGAUGGUUAUAUGAA  
|||||  
ACUCGAACUACCAUAUACUU 5'  
AT3G62980.1 2092 2112  
transport inhibitor response 1 (TIR1)

SRNA\_AG01\_SoLexa\_Mi2008\_1\_39228\_hit1

5' UGCUCAUGAGCUUGAUGGUUA  
|||||  
ACGAGUACUCGAACUACCAAU 5'  
AT3G62980.1 2098 2118  
transport inhibitor response 1 (TIR1)

SRNA\_AG01\_SoLexa\_Mi2008\_1\_51840\_hit3

5' UUGCU-GAAGAUGGUGUUGAUGC  
||| | ||||| |||  
AAC-AUCUUCUACCACAACGACG 5'  
AT4G00040.1 1045 1066  
chalcone synthase like protein

stems\_1sup\_AG01\_SoLexa\_Mi\_Cell\_2008\_hit\_target\_site.txt

SRNA\_AG01\_SoLexa\_Mi2008\_4\_35117\_hit1

5' UGAAUUGGAUCAUAUAAAGCU  
|||  
ACUUAACGUAGUAGAUUUCGA 5'  
AT4G00710.1 1966 1986  
unknown protein

SRNA\_AG01\_SoLexa\_Mi2008\_2\_52709\_hit1

5' UUGGGGUGCUCAUGAUCUAC  
|||  
AACCCACGAGUACUAGUAUG 5'  
AT4G00940.1 714 734  
putative protein

SRNA\_AG01\_SoLexa\_Mi2008\_1\_3079\_hit472

5' AUGAUGAUGAUGA-UGAUGAUGA  
|||  
UACUACUACUA-UGACUACUACC 5'  
AT4G00940.1 91 112  
putative protein

SRNA\_AG01\_SoLexa\_Mi2008\_6\_14255\_hit369

5' GAUGAUGAUGAUGAUGA-UGAUGAU  
|||  
CUAGUACUACUACUA-UGACUACUA 5'  
AT4G00940.1 93 116  
putative protein

SRNA\_AG01\_SoLexa\_Mi2008\_1\_3079\_hit472

5' AUGAUGAUGAUGAUGAUGA-UGA  
|||  
UACUAGUACUACUACUA-UGACU 5'  
AT4G00940.1 97 118  
putative protein

SRNA\_AG01\_SoLexa\_Mi2008\_11\_14066\_hit1

5' GA-GGAGUUGAAUAUCUGUUA  
|||  
CUACCUGAACUUUAUAAACAAGU 5'  
AT4G02520.1 489 510  
Atpm24.1 glutathione S transferase

SRNA\_AG01\_SoLexa\_Mi2008\_1\_32728\_hit1

5' UCUAAGGGAAAAUGUAUGAGC  
:  
GUAUCCCUUU-ACAUACUCG 5'  
AT4G04920.1 3700 3719  
unknown protein

SRNA\_AG01\_SoLexa\_Mi2008\_44\_10639\_hit2

5' CUC-AAGAUGGCAGCAU-AGU  
|||  
UAGCUUCUACCGUCGUAGUCA 5'  
AT4G08390.2 1048 1068  
stromal ascorbate peroxidase

SRNA\_AG01\_SoLexa\_Mi2008\_5\_5124\_hit2

5' CAAUCU-C-AAGAUGGCAGCAU  
|||  
GUUAGAAGCUUCUACCGUCGUA 5'  
AT4G08390.2 1052 1073  
stromal ascorbate peroxidase

stems\_1sup\_AG01\_SoLexa\_Mi\_Cell\_2008\_hit\_target\_site.txt

SRNA\_AG01\_SoLexa\_Mi2008\_5\_19199\_hit2

5' UACAAUCU-C-AAGAUGGCAGCAU  
 | ||||| | |||||  
 AAGUUAGAAGCUUCUACCGUCGUA 5'  
 AT4G08390.2 1052 1075  
 stromal ascorbate peroxidase

SRNA\_AG01\_SoLexa\_Mi2008\_1\_19198\_hit2

5' UACAAUCU-C-AAGAUGGCAGCA  
 | ||||| | |||||  
 AAGUUAGAAGCUUCUACCGUCGUA 5'  
 AT4G08390.2 1053 1075  
 stromal ascorbate peroxidase

SRNA\_AG01\_SoLexa\_Mi2008\_44\_10639\_hit2

5' CUC-AAGAUGGCAGCAU-AGU  
 || ||||| |||||  
 UAGCUUCUACCGUCGUAGUCA 5'  
 AT4G08390.1 1058 1078  
 stromal ascorbate peroxidase

SRNA\_AG01\_SoLexa\_Mi2008\_5\_5124\_hit2

5' CAAUCU-C-AAGAUGGCAGCAU  
 ||||| | |||||  
 GUUAGAAGCUUCUACCGUCGUA 5'  
 AT4G08390.1 1062 1083  
 stromal ascorbate peroxidase

SRNA\_AG01\_SoLexa\_Mi2008\_5\_19199\_hit2

5' UACAAUCU-C-AAGAUGGCAGCAU  
 | ||||| | |||||  
 AAGUUAGAAGCUUCUACCGUCGUA 5'  
 AT4G08390.1 1062 1085  
 stromal ascorbate peroxidase

SRNA\_AG01\_SoLexa\_Mi2008\_1\_19198\_hit2

5' UACAAUCU-C-AAGAUGGCAGCA  
 | ||||| | |||||  
 AAGUUAGAAGCUUCUACCGUCGUA 5'  
 AT4G08390.1 1063 1085  
 stromal ascorbate peroxidase

SRNA\_AG01\_SoLexa\_Mi2008\_1\_50784\_hit1

5' UUGAGGUAAAUGAUGUCCCCCAU  
 |||| | |||| | |||| | |||||  
 AACUC-AUUUAAUACACGGGGGUA 5'  
 AT4G08390.3 1066 1088  
 stromal ascorbate peroxidase

SRNA\_AG01\_SoLexa\_Mi2008\_1\_50784\_hit1

5' UUGAGGUAAAUGAUGUCCCCCAU  
 |||| | |||| | |||| | |||||  
 AACUC-AUUUAAUACACGGGGGUA 5'  
 AT4G08390.2 1203 1225  
 stromal ascorbate peroxidase

SRNA\_AG01\_SoLexa\_Mi2008\_1\_50784\_hit1

5' UUGAGGUAAAUGAUGUCCCCCAU  
 |||| | |||| | |||| | |||||  
 AACUC-AUUUAAUACACGGGGGUA 5'  
 AT4G08390.1 1213 1235  
 stromal ascorbate peroxidase

stems\_1sup\_AG01\_SoLexa\_Mi\_Cell\_2008\_hit\_target\_site.txt

SRNA\_AG01\_SoLexa\_Mi2008\_3\_10123\_hit2

5' CUAGAGACGAGAGAU-U-ACU  
 |||  
 GAUCUCUGCUCUCUAGACUGC 5'  
 AT4G08390.3 130 150  
 stromal ascorbate peroxidase

SRNA\_AG01\_SoLexa\_Mi2008\_3\_10123\_hit2

5' CUAGAGACGAGAGAU-U-ACU  
 |||  
 GAUCUCUGCUCUCUAGACUGC 5'  
 AT4G08390.2 264 284  
 stromal ascorbate peroxidase

SRNA\_AG01\_SoLexa\_Mi2008\_3\_10123\_hit2

5' CUAGAGACGAGAGAU-U-ACU  
 |||  
 GAUCUCUGCUCUCUAGACUGC 5'  
 AT4G08390.1 274 294  
 stromal ascorbate peroxidase

SRNA\_AG01\_SoLexa\_Mi2008\_44\_10639\_hit2

5' CUC-AAGAUGGCAGCAU-AGU  
 || |||  
 UAGCUUCUACCGUCGUAGUCA 5'  
 AT4G08390.3 911 931  
 stromal ascorbate peroxidase

SRNA\_AG01\_SoLexa\_Mi2008\_5\_5124\_hit2

5' CAAUCU-C-AAGAUGGCAGCAU  
 ||| |||  
 GUUAGAAGCUUCUACCGUCGUA 5'  
 AT4G08390.3 915 936  
 stromal ascorbate peroxidase

SRNA\_AG01\_SoLexa\_Mi2008\_5\_19199\_hit2

5' UACAAUCU-C-AAGAUGGCAGCAU  
 | ||| |||  
 AAGUUAGAAGCUUCUACCGUCGUA 5'  
 AT4G08390.3 915 938  
 stromal ascorbate peroxidase

SRNA\_AG01\_SoLexa\_Mi2008\_1\_19198\_hit2

5' UACAAUCU-C-AAGAUGGCAGCA  
 | ||| |||  
 AAGUUAGAAGCUUCUACCGUCGU 5'  
 AT4G08390.3 916 938  
 stromal ascorbate peroxidase

SRNA\_AG01\_SoLexa\_Mi2008\_1\_51487\_hit1

5' UUGCCACAUGUAG-GGAUGUC  
 ||| |||  
 UACGGUGUACAUCGCC-ACAG 5'  
 AT4G14400.2 424 443  
 unknown protein

SRNA\_AG01\_SoLexa\_Mi2008\_1\_51487\_hit1

5' UUGCCACAUGUAG-GGAUGUC  
 ||| |||  
 UACGGUGUACAUCGCC-ACAG 5'  
 AT4G14400.3 488 507  
 unknown protein

stems\_1sup\_AG01\_SoLexa\_Mi\_Cell\_2008\_hit\_target\_site.txt

SRNA\_AG01\_SoLexa\_Mi2008\_1\_51487\_hit1

5' UUGCCACAUGUAG-GGAUGUC  
|||||  
UACGGUGUACAUCGCC-ACAG 5'  
AT4G14400.1 507 526  
unknown protein

SRNA\_AG01\_SoLexa\_Mi2008\_3\_10294\_hit3

5' CUAGGGUUUCAUUGAU-UGUA  
|||||  
GAUCCCAAAGUUAGUAGACAG 5'  
AT4G14900.1 268 288  
hydroxyproline-rich glycoprotein homolog (Z97337.18)

SRNA\_AG01\_SoLexa\_Mi2008\_1\_21596\_hit4

5' UAGAGUGAACAAUGAUGAG  
||| |  
AUC-CUCUUGUUACUACUG 5'  
AT4G18130.1 1201 1218  
phytochrome E

SRNA\_AG01\_SoLexa\_Mi2008\_1\_12237\_hit1

5' CUGUGCUGCGAACUGAAGU  
||||| |||  
GACACUACGAUUGACUUCA 5'  
AT4G18130.1 1291 1309  
phytochrome E

SRNA\_AG01\_SoLexa\_Mi2008\_10\_859\_hit2

5' AAGCCUGCGCGUGAUUACCU  
||| ||  
GUCG-ACGCGCACUAA-GGAGA 5'  
AT4G18130.1 2078 2097  
phytochrome E

SRNA\_AG01\_SoLexa\_Mi2008\_1\_35722\_hit6

5' UGACUU-CA-GACCUGCGCGUGAU  
||||| || ||  
ACUGAAAGUUCUCGACGCGCACUAA 5'  
AT4G18130.1 2083 2107  
phytochrome E

SRNA\_AG01\_SoLexa\_Mi2008\_76\_35721\_hit6

5' UGACUU-CA-GACCUGCGCGUGAU  
||||| || ||  
ACUGAAAGUUCUCGACGCGCACUA 5'  
AT4G18130.1 2084 2107  
phytochrome E

SRNA\_AG01\_SoLexa\_Mi2008\_21\_35738\_hit1

5' UGACUUU-A-GACCUGCGCGUGAU  
||||| | ||  
ACUGAAAGUUCUCGACGCGCACUA 5'  
AT4G18130.1 2084 2107  
phytochrome E

SRNA\_AG01\_SoLexa\_Mi2008\_2\_13419\_hit2

5' GAAGAAGAAGAAGACA-CUU  
||||| ||| |||  
CUUCUUCUUCUU-UGUAGAA 5'  
AT4G18130.1 2669 2687  
phytochrome E

stems\_1sup\_AG01\_SoLexa\_Mi\_Cell\_2008\_hit\_target\_site.txt

SRNA\_AG01\_SoLexa\_Mi2008\_1\_13420\_hit2

5' GAAGAAGAAGAAGAC-UCUU  
 |||  
 CUUCUUCUUCUU-UGUAGAA 5'  
 AT4G18130.1 2669 2687  
 phytochrome E

SRNA\_AG01\_SoLexa\_Mi2008\_2\_13419\_hit2

5' GAAGAAGAAGAAGACA-CUU  
 |||  
 CUUCUUCUUCUU-UCGAC 5'  
 AT4G18130.1 79 97  
 phytochrome E

SRNA\_AG01\_SoLexa\_Mi2008\_1\_35652\_hit7

5' UGACU-C-AACAUGACCGGCGU  
 ||| | |||  
 ACUGAUGGUUGUACUGGCCGCU 5'  
 AT4G21910.3 301 322  
 unknown protein

SRNA\_AG01\_SoLexa\_Mi2008\_1\_35652\_hit7

5' UGACU-C-AACAUGACCGGCGU  
 ||| | |||  
 ACUGAUGGUUGUACUGGCCGCU 5'  
 AT4G21910.1 362 383  
 unknown protein

SRNA\_AG01\_SoLexa\_Mi2008\_105\_14948\_hit3

5' GGCAUAACAGGUCUGUGA  
 |||  
 ACGUUAUUGUCCAGA-ACA 5'  
 AT4G22380.1 364 381  
 Ribosomal protein L7Ae - like (fragment)

SRNA\_AG01\_SoLexa\_Mi2008\_3\_2154\_hit3

5' AGGCAUAACAGGUCUGUG  
 |||  
 AACGUUAUUGUCCAGA-AC 5'  
 AT4G22380.1 365 382  
 Ribosomal protein L7Ae - like (fragment)

SRNA\_AG01\_SoLexa\_Mi2008\_1\_14875\_hit1

5' GGAGGUGGAGGCGGUGG-UGGU  
 : |||  
 UGUCCACCUCGCCACCAACCA 5'  
 AT4G22470.1 207 228  
 extensin - like protein

SRNA\_AG01\_SoLexa\_Mi2008\_2\_43577\_hit1

5' UGGUGGUGGUGACG-UUGGUGGU  
 ||| | |||  
 ACCACCACCACU-CUAACAACCA 5'  
 AT4G22470.1 778 799  
 extensin - like protein

SRNA\_AG01\_SoLexa\_Mi2008\_1\_43578\_hit1

5' UGGUGGUGGUGAUGAUGUGUC  
 ||| | |||  
 ACCACCACCACU-CUA-ACAA 5'  
 AT4G22470.1 781 799  
 extensin - like protein

stems\_1sup\_AG01\_SoLexa\_Mi\_Cell\_2008\_hit\_target\_site.txt

SRNA\_AG01\_SoLexa\_Mi2008\_1\_44600\_hit1

5' UGUCCAUCUCCAUCUCGUUGUU  
||||||| ||||| | |||||  
ACAGGUAAGGUAGAAC-ACAA 5'  
AT4G23470.2 1069 1089  
putative protein

SRNA\_AG01\_SoLexa\_Mi2008\_1\_1652\_hit1

5' ACGGUGCGUGAAUUGUAAU  
||||||| ||||| ||||| |||||  
UGCCACGCACUUAACAUAA 5'  
AT4G23470.3 1161 1179  
putative protein

SRNA\_AG01\_SoLexa\_Mi2008\_2\_24561\_hit1

5' UAUAGGGUGCGUGAAU-GUAAU  
|||| | ||||| ||||| |||||  
AUAUGCCACGCACUUAACAUAA 5'  
AT4G23470.3 1162 1183  
putative protein

SRNA\_AG01\_SoLexa\_Mi2008\_1\_1652\_hit1

5' ACGGUGCGUGAAUUGUAAU  
||||||| ||||| ||||| |||||  
UGCCACGCACUUAACAUAA 5'  
AT4G23470.1 1227 1245  
putative protein

SRNA\_AG01\_SoLexa\_Mi2008\_2\_24561\_hit1

5' UAUAGGGUGCGUGAA-UGUAAU  
|||| | ||||| ||||| |||||  
AUAUGCCACGCACUUAACAUAA 5'  
AT4G23470.1 1228 1249  
putative protein

SRNA\_AG01\_SoLexa\_Mi2008\_1\_1652\_hit1

5' ACGGUGCGUGAAUUGUAAU  
||||||| ||||| ||||| |||||  
UGCCACGCACUUAACAUAA 5'  
AT4G23470.2 1575 1593  
putative protein

SRNA\_AG01\_SoLexa\_Mi2008\_2\_24561\_hit1

5' UAUAGGGUGCGUGAA-UGUAAU  
|||| | ||||| ||||| |||||  
AUAUGCCACGCACUUAACAUAA 5'  
AT4G23470.2 1576 1597  
putative protein

SRNA\_AG01\_SoLexa\_Mi2008\_2\_7736\_hit1

5' CCAGAA-AAGAAGAAACAAU  
|||| | ||||| ||||| |||||  
UGUCUUCUUCUUCUUGUUC 5'  
AT4G23470.2 660 679  
putative protein

SRNA\_AG01\_SoLexa\_Mi2008\_1\_44600\_hit1

5' UGUCCAUCUCCAUCUCGUUGUU  
||||||| ||||| | |||||  
ACAGGUAAGGUAGAAC-ACAA 5'  
AT4G23470.3 721 741  
putative protein

stems\_1sup\_AG01\_SoLexa\_Mi\_Cell\_2008\_hit\_target\_site.txt

SRNA\_AG01\_SoLexa\_Mi2008\_2\_56577\_hit1

5' UUUUGG-UCGGUGUGUAUGU  
 ||||| ||||| |||||  
 AAAACCCAGCCACUCAUACU 5'  
 AT4G24190.2 2303 2322  
 HSP90-like protein

SRNA\_AG01\_SoLexa\_Mi2008\_2\_56577\_hit1

5' UUUUGG-UCGGUGUGUAUGU  
 ||||| ||||| |||||  
 AAAACCCAGCCACUCAUACU 5'  
 AT4G24190.1 2307 2326  
 HSP90-like protein

SRNA\_AG01\_SoLexa\_Mi2008\_1\_16810\_hit10

5' UAAAG-GAGAACAUGACGGUGG  
 | ||| ||||| |||||  
 AGUUCGCUCUUGUACUACCACC 5'  
 AT4G24330.1 153 174  
 unknown protein

SRNA\_AG01\_SoLexa\_Mi2008\_1\_7006\_hit1

5' CAUCAUCAUCAUCACAGAAG  
 ||| ||||| |||||  
 CGAGU-GUAGUAGUGUCUUC 5'  
 AT4G24690.1 2174 2192  
 unknown protein

SRNA\_AG01\_SoLexa\_Mi2008\_1\_50495\_hit1

5' UUGAGACCCGACGCGAUGGC  
 ||||| ||||| |||||  
 AACUCUGGGCUG-GCUACGA 5'  
 AT4G25000.1 760 778  
 alpha-amylase like protein

SRNA\_AG01\_SoLexa\_Mi2008\_8\_15580\_hit6

5' GUCAAAGUGAGAU-AUGGUUUU  
 ||||| ||||| |||||  
 CAGUUUCACUC-ACGACCAAAA 5'  
 AT4G28250.2 476 496  
 putative Expansin (AtEXPB3) /allergen protein

SRNA\_AG01\_SoLexa\_Mi2008\_1\_43726\_hit3

5' UGGUUAAGGAGAUAGACUUGA  
 ||||| || ||||| |||||  
 ACCAAAUC-UCUAUCUGAACC 5'  
 AT4G28490.1 86 105  
 receptor-like protein kinase 5 precursor (RLK5)

SRNA\_AG01\_SoLexa\_Mi2008\_3\_36318\_hit1

5' UGAGGAUGACUAUGGUGAUGAG  
 ||| ||||| ||||| |||||  
 ACUACUACUGUUACCACUACUA 5'  
 AT4G28530.2 798 819  
 NAM / CUC2 -like protein

SRNA\_AG01\_SoLexa\_Mi2008\_3\_36318\_hit1

5' UGAGGAUGACUAUGGUGAUGAG  
 ||| ||||| ||||| |||||  
 ACUACUACUGUUACCACUACUA 5'  
 AT4G28530.1 909 930  
 NAM / CUC2 -like protein



stems\_1sup\_AG01\_SoIexa\_Mi\_Cell\_2008\_hit\_target\_site.txt

SRNA\_AG01\_SoIexa\_Mi2008\_2\_13419\_hit2  
5' GAAGAAGAAGAAGACACUU  
|  
CUUCUUCUUCUUCUGUUUU 5'  
AT4G30190.1 3021 3039  
H<sup>+</sup>-transporting ATPase type 2, plasma membrane

SRNA\_AG01\_SoIexa\_Mi2008\_7\_353\_hit2  
5' AAAGAAGAAGAUAAAGCAU  
|  
UUUCUUCUUCUAAUUC-UA 5'  
AT4G30190.1 3256 3273  
H<sup>+</sup>-transporting ATPase type 2, plasma membrane

SRNA\_AG01\_SoIexa\_Mi2008\_1\_173\_hit2  
5' AAAAGAAGAAGAUAAAGCAU  
|  
UUUUCUUCUUCUAAUUC-UA 5'  
AT4G30190.1 3256 3274  
H<sup>+</sup>-transporting ATPase type 2, plasma membrane

SRNA\_AG01\_SoIexa\_Mi2008\_1\_16281\_hit2  
5' UAAAAAGAAGAAGAUAAAGCAU  
:|  
GUUUUUCUUCUUCUAAUUC-UA 5'  
AT4G30190.1 3256 3276  
H<sup>+</sup>-transporting ATPase type 2, plasma membrane

SRNA\_AG01\_SoIexa\_Mi2008\_1\_53875\_hit1  
5' UUUAAACAGGUAAAGAAAACAG  
|  
AAAUUAGUCCAUUU-UUUUU-UC 5'  
AT4G30350.1 113 133  
unknown protein

SRNA\_AG01\_SoIexa\_Mi2008\_2\_116\_hit3  
5' AAA-AAGAUAAAGAGAGAUAG  
|  
GUUCUUCUAAUUCUCUC-AUC 5'  
AT4G30350.1 416 434  
unknown protein

SRNA\_AG01\_SoIexa\_Mi2008\_2\_13419\_hit2  
5' GAAGAAGAAGAAGAC-ACUU  
|  
CUUCUUCUUCUUCUGCUGCU 5'  
AT4G30350.1 571 590  
unknown protein

SRNA\_AG01\_SoIexa\_Mi2008\_1\_1549\_hit1  
5' ACCGGAGAAGAAGAAGAUAGAC  
|  
CUGCCUCUUCUUCUUCUUCUG 5'  
AT4G30350.1 575 595  
unknown protein

SRNA\_AG01\_SoIexa\_Mi2008\_1\_49131\_hit1  
5' UUCCGUGGUUGUGAUUGUGGC  
|  
AAGGCACCAACACUAACACCG 5'  
AT4G30960.1 1220 1240  
CBL-interacting protein kinase 6 (CIPK6)



stems\_1sup\_AG01\_SoLexa\_Mi\_Cell\_2008\_hit\_target\_site.txt

SRNA\_AG01\_SoLexa\_Mi2008\_4\_44164\_hit1  
5' UGUAGCAACGGUUGUGGUGGU  
||| | ||||| |||||  
ACAUGGUUGCCAACA-CACCA 5'  
AT4G37430.1 455 474  
cytochrome P450 monooxygenase (CYP91A2)

SRNA\_AG01\_SoLexa\_Mi2008\_12\_19173\_hit1  
5' UACAAGGUGUUGU-GAAGUCUA  
||| | ||||| : |||||  
AUGUCCACAACAGUUUCAGAA 5'  
AT4G37910.1 902 923  
heat shock protein 70 like protein

SRNA\_AG01\_SoLexa\_Mi2008\_1\_36855\_hit2  
5' UGAGUGUUGUGGUCAAUUGG  
||| | ||||| |||||  
UGUCACAACACCAGUGUACCC 5'  
AT4G38540.1 692 712  
monooxygenase 2 (MO2)

SRNA\_AG01\_SoLexa\_Mi2008\_1\_31918\_hit1  
5' UCGGCCGGUUGAUGGAUUGU-UG  
||| | | ||||| ||||| ||  
AGCCG-CAAACUACCUAACAGAC 5'  
AT4G39950.1 1078 1099  
cytochrome P450 like protein

SRNA\_AG01\_SoLexa\_Mi2008\_5\_8180\_hit2  
5' CCUGAUGAUGAUGUACAA-CAC  
||| | ||||| ||| |||  
GGACUACUACUACAGGUUAGUG 5'  
AT5G02190.1 1354 1375  
unknown protein

SRNA\_AG01\_SoLexa\_Mi2008\_3\_30265\_hit2  
5' UCCUGAUGAUGAUGUACAA-CAC  
||| | ||||| ||| |||  
UGGACUACUACUACAGGUUAGUG 5'  
AT5G02190.1 1354 1376  
unknown protein

SRNA\_AG01\_SoLexa\_Mi2008\_7\_353\_hit2  
5' AAAGAAGAAGAUAAAGCAU  
||| | ||||| ||| ||  
GUUCUUCUUCUACUUC-UA 5'  
AT5G02190.1 177 194  
unknown protein

SRNA\_AG01\_SoLexa\_Mi2008\_1\_173\_hit2  
5' AA-AAGAAGAAGAUAAAGCAU  
|| | ||||| ||| ||  
UUCUUCUUCUUCUACUUC-UA 5'  
AT5G02190.1 177 196  
unknown protein

SRNA\_AG01\_SoLexa\_Mi2008\_2\_6093\_hit1  
5' CAGAGGUUGAGGUUGACGUGC  
||| | ||||| ||||| ||  
UUCUCCAACUCCAACUGC-CG 5'  
AT5G03350.1 85 104  
protein kinase - like

stems\_1sup\_AG01\_SoLexa\_Mi\_Cell\_2008\_hit\_target\_site.txt

SRNA\_AG01\_SoLexa\_Mi2008\_9\_14254\_hit8

```
5' GAUGAUGAUGAUGAUGAUC-UU
   |||
   CUACUACUACUACUACUAGUAA 5'
AT5G03545.1 292 313
unknown protein
```

SRNA\_AG01\_SoLexa\_Mi2008\_6\_14255\_hit369

```
5' GAUGAUGAUGAUGAUGAUGAUGAU
   |||
   CUACUACUACUACUACUACUAGUA 5'
AT5G03545.1 292 315
unknown protein
```

SRNA\_AG01\_SoLexa\_Mi2008\_1\_14256\_hit8

```
5' GAUGAUGAUGAUGAUGAUGAUGUU
   |||
   CUACUACUACUACUACUACUAGUA 5'
AT5G03545.1 292 315
unknown protein
```

SRNA\_AG01\_SoLexa\_Mi2008\_1\_36323\_hit13

```
5' UGAGGAUGAUGAUGAUGAUGAUGA
   |||
   ACUACUACUACUACUACUAGU 5'
AT5G03545.1 293 313
unknown protein
```

SRNA\_AG01\_SoLexa\_Mi2008\_1\_3079\_hit472

```
5' AUGAUGAUGAUGAUGAUGAUGAUGA
   |||
   UACUACUACUACUACUACUAGU 5'
AT5G03545.1 293 314
unknown protein
```

SRNA\_AG01\_SoLexa\_Mi2008\_1\_45039\_hit3

```
5' UG-UGAUGAUGAUGAUGAUGAUGAUGA
   ||
   ACUACUACUACUACUACUACUAGU 5'
AT5G03545.1 294 317
unknown protein
```

SRNA\_AG01\_SoLexa\_Mi2008\_9\_14254\_hit8

```
5' GAUGAUGAUGAUGAUGAUGAUCUU
   |||
   CUACUACUACUACUACUACUA 5'
AT5G03545.1 295 315
unknown protein
```

SRNA\_AG01\_SoLexa\_Mi2008\_6\_14255\_hit369

```
5' GAUGAUGAUGAUGAUGAUGAUGAUGAU
   :|||
   UUACUACUACUACUACUACUACUA 5'
AT5G03545.1 295 318
unknown protein
```

SRNA\_AG01\_SoLexa\_Mi2008\_1\_14256\_hit8

```
5' GAUGAUGAUGAUGAUGAUGAUGUU
   :|||
   UUACUACUACUACUACUACUACUA 5'
AT5G03545.1 295 318
unknown protein
```

stems\_1sup\_AG01\_SoLexa\_Mi\_Cell\_2008\_hit\_target\_site.txt

SRNA\_AG01\_SoLexa\_Mi2008\_7\_3078\_hit1

5' AUGAUGAUGA-GAAUGAUGAU  
 |||||  
 UACUACUACUAC-UACUACUA 5'  
 AT5G03545.1 296 315  
 unknown protein

SRNA\_AG01\_SoLexa\_Mi2008\_1\_36323\_hit13

5' UGAGGAUGAUGAUGAUGAUGA  
 ||| |||||  
 ACUACUACUACUACUACUACU 5'  
 AT5G03545.1 296 316  
 unknown protein

SRNA\_AG01\_SoLexa\_Mi2008\_1\_3079\_hit472

5' AUGAUGAUGAUGAUGAUGAUGA  
 |||||  
 UACUACUACUACUACUACUACU 5'  
 AT5G03545.1 296 317  
 unknown protein

SRNA\_AG01\_SoLexa\_Mi2008\_1\_45039\_hit3

5' UGUGAUGAUGAUGAUGAUGAUGA  
 :|||  
 UUACUACUACUACUACUACUACU 5'  
 AT5G03545.1 296 318  
 unknown protein

SRNA\_AG01\_SoLexa\_Mi2008\_1\_56092\_hit3

5' UUUG-UGAUGAUGAUGAUGAUGA  
 |||||  
 AAACUACUACUACUACUACUACU 5'  
 AT5G03545.1 297 319  
 unknown protein

SRNA\_AG01\_SoLexa\_Mi2008\_6\_14255\_hit369

5' GAUGAUGAUGAUGAUGAUGAUGA  
 |||:|||||  
 CUAUUACUACUACUACUACUACUA 5'  
 AT5G03545.1 298 321  
 unknown protein

SRNA\_AG01\_SoLexa\_Mi2008\_1\_14256\_hit8

5' GAUGAUGAUGAUGAUGAUGAUGUU  
 |||:|||||  
 CUAUUACUACUACUACUACUACUA 5'  
 AT5G03545.1 298 321  
 unknown protein

SRNA\_AG01\_SoLexa\_Mi2008\_7\_3078\_hit1

5' AUGAUGAUGA-GAAUGAUGAU  
 |||||  
 UACUACUACUACU-ACUACUA 5'  
 AT5G03545.1 299 318  
 unknown protein

SRNA\_AG01\_SoLexa\_Mi2008\_1\_3079\_hit472

5' AUGAUGAUGAUGAUGAUGAUGA  
 |||:|||||  
 ACCUAUUACUACUACUACUACU 5'  
 AT5G03545.1 302 323  
 unknown protein

stems\_1sup\_AG01\_SoLexa\_Mi\_Cell\_2008\_hit\_target\_site.txt

SRNA\_AG01\_SoLexa\_Mi2008\_4\_14169\_hit1

5' GAUAAUGAUGAUGAAAGAUGA  
 |||  
 CUAUUACUACUACUA-CUACU 5'  
 AT5G03545.1 303 322  
 unknown protein

SRNA\_AG01\_SoLexa\_Mi2008\_1\_39699\_hit1

5' UGGA-ACUGAUGAUGAUGAUGA  
 |||||  
 ACCUAUUACUACUACUACUACU 5'  
 AT5G03545.1 303 324  
 unknown protein

SRNA\_AG01\_SoLexa\_Mi2008\_1\_45039\_hit3

5' UGUGAUGAUGAUGAUGAUGAUGA  
 || |||:|||||  
 AC-CUAUUACUACUACUACUACU 5'  
 AT5G03545.1 303 324  
 unknown protein

SRNA\_AG01\_SoLexa\_Mi2008\_1\_52789\_hit1

5' UUGGGUGAUGAUGAUGAUUGAU  
 ||||:|:|||||  
 AACCUAUUACUACUACUA-CUA 5'  
 AT5G03545.1 305 325  
 unknown protein

SRNA\_AG01\_SoLexa\_Mi2008\_1\_2280\_hit1

5' AGUGGAUGAUGAUGAUGAUGAUG  
 | ||||:|||||  
 UAACCUAUUACUACUACUAC 5'  
 AT5G03545.1 306 325  
 unknown protein

SRNA\_AG01\_SoLexa\_Mi2008\_1\_56092\_hit3

5' UUUGUGAUGAUGAUGAUGAUGAUGA  
 |||| |||:|||||  
 AAAC-CUAUUACUACUACUACU 5'  
 AT5G03545.1 306 326  
 unknown protein

SRNA\_AG01\_SoLexa\_Mi2008\_1\_7082\_hit4

5' CAUCUCCAGGA-ACCUCUUGAU  
 | ||||| || |||||  
 GGAGAGGUCCUAUG-AGAACUA 5'  
 AT5G05320.1 800 820  
 monooxygenase

SRNA\_AG01\_SoLexa\_Mi2008\_1\_646\_hit1

5' AACAGAAAAAAAAACA-UGAU  
 ||||:|||||  
 UUGUUUUUUUUUUGUAACUU 5'  
 AT5G05340.1 1138 1157  
 peroxidase

SRNA\_AG01\_SoLexa\_Mi2008\_1\_21951\_hit1

5' UAGAUUUACAGUUGAUUGUUU  
 ||||:||| |||||  
 AUCUGAAUCUCAACUAACAAC 5'  
 AT5G05340.1 5 25  
 peroxidase

stems\_1sup\_AG01\_SoLexa\_Mi\_Cell\_2008\_hit\_target\_site.txt

SRNA\_AG01\_SoLexa\_Mi2008\_13\_14779\_hit6

```
5' GCUGAGAAUCGAAAU-AGUU
   || |||||
   AGA-UCUUAGCUUUUAUCAA 5'
AT5G05340.1    70    88
peroxidase
```

SRNA\_AG01\_SoLexa\_Mi2008\_6\_11866\_hit1

```
5' CUGGAACAG-AUUCUCGAAGGUC
   ||||| || |||||
   GACCUUGUCGUAU-AGCUUCCAG 5'
AT5G05520.1    1061   1082
Unknown protein (MOP10.6)
```

SRNA\_AG01\_SoLexa\_Mi2008\_7\_6238\_hit2

```
5' CAGCAACAGGUGGAAAGUCA
   || ||| |||||
   AUC-UUGGCCACCUUUCAGUU 5'
AT5G06600.2    1253   1272
ubiquitin carboxyl-terminal hydrolase
```

SRNA\_AG01\_SoLexa\_Mi2008\_7\_6238\_hit2

```
5' CAGCAACAGGUGGAAAGUCA
   || ||| |||||
   AUC-UUGGCCACCUUUCAGUU 5'
AT5G06600.3    1254   1273
ubiquitin carboxyl-terminal hydrolase
```

SRNA\_AG01\_SoLexa\_Mi2008\_3\_7100\_hit6

```
5' CAU-GAAAUUGAUGUUGCGC
   ||| ||| |||||
   GUAACUU-AACUACAACGCA 5'
AT5G06600.2    520    538
ubiquitin carboxyl-terminal hydrolase
```

SRNA\_AG01\_SoLexa\_Mi2008\_3\_7100\_hit6

```
5' CAU-GAAAUUGAUGUUGCGC
   ||| ||| |||||
   GUAACUU-AACUACAACGCA 5'
AT5G06600.3    521    539
ubiquitin carboxyl-terminal hydrolase
```

SRNA\_AG01\_SoLexa\_Mi2008\_1\_11845\_hit13

```
5' CUG-CUUCUUGGCCUCUGUGAU
   ||| ||||| ||||| |||
   GACCGAAGAACAGGAGAC-CUA 5'
AT5G07340.1    767    787
calnexin homolog
```

SRNA\_AG01\_SoLexa\_Mi2008\_1\_44503\_hit1

```
5' UGUCACUGUU-GAUGAUGAGAC
   ||| | |||| |||||
   ACA-UAACAAACUACUACUCUG 5'
AT5G07460.1    101    121
peptide methionine sulfoxide reductase-like protein
```

SRNA\_AG01\_SoLexa\_Mi2008\_5\_50473\_hit1

```
5' UUGAGAAGGAGAAGUUUCA
   : |||||
   GCCUCUCCUCUCAAAGG 5'
AT5G07460.1    166    184
peptide methionine sulfoxide reductase-like protein
```

stems\_1sup\_AG01\_SoLexa\_Mi\_Cell\_2008\_hit\_target\_site.txt

SRNA\_AG01\_SoLexa\_Mi2008\_1\_28303\_hit1

5' UCA-GCCAAGGAUUCUCUGAGAA  
||| |||| |  
AGUGCUGUCCUAAGAGAC-CUU 5'

AT5G07460.1 330 351  
peptide methionine sulfoxide reductase-like protein

SRNA\_AG01\_SoLexa\_Mi2008\_2\_3654\_hit1

5' AUUGAAGGUGGUAGGUACUUA  
||| |  
UAAGUUCACCAUCC-U-AAU 5'

AT5G07460.1 509 527  
peptide methionine sulfoxide reductase-like protein

SRNA\_AG01\_SoLexa\_Mi2008\_339\_11394\_hit3

5' CUGAAGUGUUUGGGGAACUC  
|:|  
AACUUCACAAACCCUCUUGAA 5'

AT5G10180.1 124 144  
sulfate transporter

SRNA\_AG01\_SoLexa\_Mi2008\_1\_22796\_hit1

5' UAGGAUUAUUGAUUAGUGU  
|:|  
AUCCUAUAACUA-AUCAUA 5'

AT5G10180.1 1712 1729  
sulfate transporter

SRNA\_AG01\_SoLexa\_Mi2008\_1\_4581\_hit2

5' CAAGA-AUACUACAGCCAU-GGUC  
|:|  
GUUCUCUAUGAUGUCGGUGGCCAG 5'

AT5G10180.1 590 613  
sulfate transporter

SRNA\_AG01\_SoLexa\_Mi2008\_15\_14657\_hit1

5' GCGAAGAAGGAUCUGGUUA  
|:|  
CGCUUCUCCAACACCAAU 5'

AT5G10180.1 682 700  
sulfate transporter

SRNA\_AG01\_SoLexa\_Mi2008\_6\_50680\_hit1

5' UUGAGGCAAAGAACAUCCGAA  
|:|  
CACUCC-UUUCUUGUAGGCUC 5'

AT5G10180.1 931 950  
sulfate transporter

SRNA\_AG01\_SoLexa\_Mi2008\_1\_20849\_hit1

5' UAGAACCU-CGGUCGAGAAUG-GU  
|:|  
AUCGUGGAAGCCAGCUCUACUCA 5'

AT5G10760.1 1046 1069  
nucleoid DNA-binding protein cnd41 - like protein

SRNA\_AG01\_SoLexa\_Mi2008\_1\_4400\_hit1

5' CAACAUUUAGCGUCGUCUGC  
|:|  
GUUGUAGAUCGCAGCAGACG 5'

AT5G10760.1 1367 1386  
nucleoid DNA-binding protein cnd41 - like protein

stems\_1sup\_AG01\_SoLexa\_Mi\_Cell\_2008\_hit\_target\_site.txt

SRNA\_AG01\_SoLexa\_Mi2008\_1\_3917\_hit1

5' CAAAAGAAGCAA-AAGUUUGUU  
 ||||| || || |||||  
 GUUUUCUUC-UUCUUAAAACAA 5'  
 AT5G13080.1 50 70  
 WRKY-like protein

SRNA\_AG01\_SoLexa\_Mi2008\_1\_17162\_hit1

5' UAACA-AGAGGAAGAAGAACGAU  
 ||||| ||||| ||||| |||||  
 AUUGUCUCUCCUUCUUCUU-CUU 5'  
 AT5G13180.1 24 45  
 NAM-like protein

SRNA\_AG01\_SoLexa\_Mi2008\_1\_14\_hit1

5' AAAAAACAGAGAACAAGAAGA  
 ||||| ||||| |||||  
 CUUUUUUGUCUCUCCUUCUUCU 5'  
 AT5G13180.1 27 48  
 NAM-like protein

SRNA\_AG01\_SoLexa\_Mi2008\_1\_341\_hit1

5' AAAGAAACAGAGAGGAAGAU  
 ||| ||||| ||||| |||||  
 UUU-UUUGUCUCUCCUUCUU 5'  
 AT5G13180.1 30 48  
 NAM-like protein

SRNA\_AG01\_SoLexa\_Mi2008\_3\_10681\_hit1

5' CUCACGAUUUGAUUCCUCU  
 |: ||||| ||||| |||||  
 GGUUGCUAACUAAGGAGA 5'  
 AT5G13180.1 383 402  
 NAM-like protein

SRNA\_AG01\_SoLexa\_Mi2008\_21\_23402\_hit1

5' UAGGUCGAGCUUCAUUGGA  
 ||| ||||| ||||| |||||  
 CUCCUGCUCGAAGUAACCU 5'  
 AT5G13550.1 197 215  
 sulfate transporter

SRNA\_AG01\_SoLexa\_Mi2008\_1\_21106\_hit1

5' UAGAC-GUAAAUUGGUGGCAU  
 ||||| ||||| ||||| |||||  
 AUCUGGCAUUUAACCACCUUC 5'  
 AT5G13550.1 426 446  
 sulfate transporter

SRNA\_AG01\_SoLexa\_Mi2008\_1\_40339\_hit1

5' UGGAGAUGGAAGAUGAG-CC  
 ||||| ||||| ||||| |||||  
 ACCUCUACCUCCACUCUGG 5'  
 AT5G13930.1 876 895  
 chalcone synthase (naringenin-chalcone synthase) (testa 4 protein) (sp|P13114)

SRNA\_AG01\_SoLexa\_Mi2008\_1\_45665\_hit1

5' UGUGUGAAGAGAGAAUGAUGG  
 ||||| ||||| ||||| |||||  
 ACACACUUCUCUCUACUACC 5'  
 AT5G14930.2 422 442  
 SAG101

stems\_1sup\_AG01\_SoIexa\_Mi\_Cell\_2008\_hit\_target\_site.txt

SRNA\_AG01\_SoIexa\_Mi2008\_1\_45665\_hit1

5' UGUGUGAAGAGAGAAUGAUGG  
 |||  
 ACACACUUCUCUCUUACUACC 5'  
 AT5G14930.3 423 443  
 SAG101

SRNA\_AG01\_SoIexa\_Mi2008\_4\_12767\_hit1

5' CUUGAGCGUUUGG-GUCAACUA  
 |||  
 GAACUCGCAAACCUC-GUUGAG 5'  
 AT5G14930.2 498 518  
 SAG101

SRNA\_AG01\_SoIexa\_Mi2008\_4\_12767\_hit1

5' CUUGAGCGUUUGG-GUCAACUA  
 |||  
 GAACUCGCAAACCUC-GUUGAG 5'  
 AT5G14930.3 499 519  
 SAG101

SRNA\_AG01\_SoIexa\_Mi2008\_5\_29024\_hit1

5' UC-AUGGUUUCAAGAAUGCU  
 || |||  
 AGCUACCAAAGUUCUU-CGG 5'  
 AT5G14930.2 586 604  
 SAG101

SRNA\_AG01\_SoIexa\_Mi2008\_5\_29024\_hit1

5' UC-AUGGUUUCAAGAAUGCU  
 || |||  
 AGCUACCAAAGUUCUU-CGG 5'  
 AT5G14930.3 587 605  
 SAG101

SRNA\_AG01\_SoIexa\_Mi2008\_1\_34515\_hit1

5' UGAAG-AAGCAAUGGGGUA  
 ||| |||  
 UCUUCCUUCGUUUA-CCCAU 5'  
 AT5G17860.1 12 30  
 potassium-dependent sodium-calcium exchanger - like protein

SRNA\_AG01\_SoIexa\_Mi2008\_7\_30129\_hit1

5' UCCUA-CACAGAUGGGCUUAUC  
 ||| ||| |||  
 AGGAUCGUGCCUACCCGAAUUAU 5'  
 AT5G17860.1 1338 1359  
 potassium-dependent sodium-calcium exchanger - like protein

SRNA\_AG01\_SoIexa\_Mi2008\_1\_1962\_hit2

5' AGAGUGCUCAAAGCAAGCCU  
 :|||: |||  
 GUUCACGGGUUCGUUCGGA 5'  
 AT5G17860.1 1598 1617  
 potassium-dependent sodium-calcium exchanger - like protein

SRNA\_AG01\_SoIexa\_Mi2008\_1\_27200\_hit1

5' UCAAGG-CAAGGAAACAGAGGUC  
 ||| ||| |||  
 AGUUCUGUUC-UUUGUCUCAU 5'  
 AT5G17860.1 1681 1702  
 potassium-dependent sodium-calcium exchanger - like protein

stems\_1sup\_AG01\_SoIexa\_Mi\_Cell\_2008\_hit\_target\_site.txt

SRNA\_AG01\_SoIexa\_Mi2008\_3\_13421\_hit1

5' GAAGAAGAAGAUGAUGUUGAU  
:||||| ||||| |||||  
UUUCUACUUCUUCUACAACUA 5'

AT5G17860.1 81 101

potassium-dependent sodium-calcium exchanger - like protein

SRNA\_AG01\_SoIexa\_Mi2008\_1\_22493\_hit1

5' UAGCUCCUGAU-GGUCGAGUA  
||||| ||||| |||||  
AUCGAGGACUACCCAGAUCAG 5'

AT5G18470.1 778 798

unknown protein

SRNA\_AG01\_SoIexa\_Mi2008\_2\_2731\_hit1

5' AUAUGUUCUCUGUCUGCUUCU  
||||| ||||| |||||  
UAUACAAGA--CAGACGAAGA 5'

AT5G19440.1 40 58

cinnamyl-alcohol dehydrogenase - like protein

SRNA\_AG01\_SoIexa\_Mi2008\_3\_17070\_hit1

5' UAA-AUGGCCAAGUUG-AUGUU  
||| ||||| ||||| |||||  
AUUCUACCGGUUCAACCUCCAA 5'

AT5G19690.1 1215 1236

oligosaccharyl transferase STT3-like protein

SRNA\_AG01\_SoIexa\_Mi2008\_4\_46322\_hit1

5' UUAA-AUGGCCAAGUUG-AUGUU  
||| ||||| ||||| |||||  
AAUUCUACCGGUUCAACCUCCAA 5'

AT5G19690.1 1215 1237

oligosaccharyl transferase STT3-like protein

SRNA\_AG01\_SoIexa\_Mi2008\_1\_40533\_hit1

5' UGGAGGAUGAGAUUGCAGUGCA  
||||| ||||| ||||| |||||  
ACCUC-UACUGUAACGUCACGG 5'

AT5G19690.1 1979 1999

oligosaccharyl transferase STT3-like protein

SRNA\_AG01\_SoIexa\_Mi2008\_3\_22541\_hit1

5' UAGCUUCAGGACAGAAAGUA  
||||| ||||| ||||| |||||  
AUCGAAGUCUUGUCUUUCCU 5'

AT5G20280.1 1748 1767

sucrose-phosphate synthase-like protein

SRNA\_AG01\_SoIexa\_Mi2008\_2\_49282\_hit2

5' UUCGAUGUCGGCUCUCCUAUC  
||||| ||||| ||||| |||||  
AAGCUAAAAC-GAGAAGGAUAG 5'

AT5G20280.1 2327 2347

sucrose-phosphate synthase-like protein

SRNA\_AG01\_SoIexa\_Mi2008\_1\_54615\_hit4

5' UUUUUUG-GGUACACAAUUA  
||||:|| ||||| |||||  
AAAUGACACCAUGUGUUUUA 5'

AT5G23010.1 1621 1641

2-isopropylmalate synthase-like; homocitrate synthase-like

stems\_1sup\_AG01\_SoLexa\_Mi\_Cell\_2008\_hit\_target\_site.txt

SRNA\_AG01\_SoLexa\_Mi2008\_2\_255\_hit1

5' AAA-AUAGUGUGGGAA-UGUUA  
||| |||||  
UUUCUAUCACACCCUUAACAAA 5'

AT5G23010.1 5 26  
2-isopropylmalate synthase-like; homocitrate synthase-like

SRNA\_AG01\_SoLexa\_Mi2008\_9\_13465\_hit1

5' GAAGAUUGG-GUGGGAAUUGUUU  
|||:| |||||  
AUUCUAUCACACCCUUAACAAA 5'

AT5G23010.1 5 26  
2-isopropylmalate synthase-like; homocitrate synthase-like

SRNA\_AG01\_SoLexa\_Mi2008\_2\_13247\_hit1

5' CUUUGUGGUGAUGUUUUUGUUA  
||| ||| |||||  
GAAACACCAAUACACAAACAAA 5'

AT5G24090.1 51 72  
acidic endochitinase (dbj|BAA21861.1)

SRNA\_AG01\_SoLexa\_Mi2008\_2\_13246\_hit1

5' CUUUGUGGUGAUGUUUUUGUUA  
||| ||| |||||  
GAAACACCAAUACACAAACAAA 5'

AT5G24090.1 52 72  
acidic endochitinase (dbj|BAA21861.1)

SRNA\_AG01\_SoLexa\_Mi2008\_41\_6691\_hit3

5' CAGUCAUAGAUAGUCUCUGCAA  
||| ||||| |||  
CUCAGAAUCUAUCAGAGAGGUU 5'

AT5G24530.1 496 517  
flavanone 3-hydroxylase-like protein

SRNA\_AG01\_SoLexa\_Mi2008\_1\_2\_hit38

5' AAAA-AAAAAAAAAACCAU  
||| ||||| |||  
UUUUUUUUUUUUUUU-GUA 5'

AT5G25610.1 1436 1454  
dehydration-induced protein RD22

SRNA\_AG01\_SoLexa\_Mi2008\_4\_43921\_hit1

5' UGUAAA-GGGUGUUAGUAGAAAG  
||| ||| |||||  
ACAUUUUCCCAAAUUAUCUUUC 5'

AT5G25610.1 22 44  
dehydration-induced protein RD22

SRNA\_AG01\_SoLexa\_Mi2008\_1\_50782\_hit1

5' UUGAGG-GUUGGAAUAGACAUGG  
||| || ||||| |||  
AAC-CCUCAACCUUAUCUUUACC 5'

AT5G25610.1 93 114  
dehydration-induced protein RD22

SRNA\_AG01\_SoLexa\_Mi2008\_8\_50781\_hit1

5' UUGAGG-GUUGGAAUAGACAUG  
||| || ||||| |||  
AAC-CCUCAACCUUAUCUUUAC 5'

AT5G25610.1 94 114  
dehydration-induced protein RD22

stems\_1sup\_AG01\_SoLexa\_Mi\_Cell\_2008\_hit\_target\_site.txt

SRNA\_AG01\_SoLexa\_Mi2008\_1\_1627\_hit6

5' ACGGAAUAGCGAGUUGGUC  
 |||  
 UGCCUUAUCGCUCA-C-AG 5'  
 AT5G25770.2 1034 1050  
 unknown protein

SRNA\_AG01\_SoLexa\_Mi2008\_1\_1627\_hit6

5' ACGGAAUAGCGAGUUGGUC  
 |||  
 UGCCUUAUCGCUC-A-CAG 5'  
 AT5G25770.3 1043 1059  
 unknown protein

SRNA\_AG01\_SoLexa\_Mi2008\_1\_1627\_hit6

5' ACGGAAUAGCGAGUUGGUC  
 |||  
 UGCCUUAUCGCUCA-C-AG 5'  
 AT5G25770.1 1277 1293  
 unknown protein

SRNA\_AG01\_SoLexa\_Mi2008\_1\_33976\_hit1

5' UCUUGGUGGACAUG-AGUGGAC  
 |||: |||  
 AGAACACCUGUAUAUACCUA 5'  
 AT5G26000.2 1672 1693  
 myrosinase precursor

SRNA\_AG01\_SoLexa\_Mi2008\_1\_16880\_hit3

5' UAAAGGUC-U-AUCUAUGGAGCA  
 ||| || |||  
 AUUUCGAGGAAUAGAUACCUCGU 5'  
 AT5G26000.2 1720 1742  
 myrosinase precursor

SRNA\_AG01\_SoLexa\_Mi2008\_1\_45612\_hit67

5' UGUGUAUAGCUCGUAGAUGGG  
 ||| || |||  
 ACACAUUUCGACCAACUACCA 5'  
 AT5G26000.2 640 660  
 myrosinase precursor

SRNA\_AG01\_SoLexa\_Mi2008\_8\_53727\_hit2

5' UUGUAAAAGAAGAUUGGAG-AAA  
 ||| ||| ||| |||  
 AACAAUCUUCUA-CUCGUUU 5'  
 AT5G27760.1 34 54  
 unknown protein

SRNA\_AG01\_SoLexa\_Mi2008\_1\_56174\_hit2

5' UUUGUAAAAGAAGAUUGGAG-AA  
 ||| ||| ||| |||  
 AACAAUCUUCUA-CUCGUU 5'  
 AT5G27760.1 35 55  
 unknown protein

SRNA\_AG01\_SoLexa\_Mi2008\_3\_13907\_hit1

5' GAGAAGAGAUAGA-AUAGAAU  
 ||| ||| |||  
 CUCUUCUCUAUCUCUACCUUU 5'  
 AT5G33290.1 326 346  
 unknown protein

stems\_1sup\_AG01\_SoLexa\_Mi\_Cell\_2008\_hit\_target\_site.txt

SRNA\_AG01\_SoLexa\_Mi2008\_13\_13906\_hit2

5' GAGAAGAGAUAGA-AUAGAA  
 |||  
 CUCUUCUCUAUCUCUACCUU 5'  
 AT5G33290.1 327 346  
 unknown protein

SRNA\_AG01\_SoLexa\_Mi2008\_4\_35785\_hit2

5' UGAGAAGAGAUAGA-AUAGAA  
 :|||  
 GCUCUUCUCUAUCUCUACCUU 5'  
 AT5G33290.1 327 347  
 unknown protein

SRNA\_AG01\_SoLexa\_Mi2008\_40\_50469\_hit1

5' UUGAGAAGAGAUAGA-AUAGAA  
 |:|||  
 AGCUCUUCUCUAUCUCUACCUU 5'  
 AT5G33290.1 327 348  
 unknown protein

SRNA\_AG01\_SoLexa\_Mi2008\_1\_2422\_hit4

5' AUAUAUUCAGAUAAACUCGGU  
 |||  
 UAUUAUAAGUCU-UUGA-CCU 5'  
 AT5G33370.2 459 477  
 unknown protein

SRNA\_AG01\_SoLexa\_Mi2008\_2\_40489\_hit1

5' UGGAGGACAAGCUAGUGAUCGU  
 |||:|  
 ACCUCCUGUUCGUUACUAGCU 5'  
 AT5G36220.1 847 868  
 cytochrome P450 monooxygenase (CYP81D1 )

SRNA\_AG01\_SoLexa\_Mi2008\_2\_35253\_hit1

5' UGACAGACUGAUGUGUUAGA  
 ||| | |||  
 ACUGAC-GACUACACAAUCA 5'  
 AT5G36220.1 940 958  
 cytochrome P450 monooxygenase (CYP81D1 )

SRNA\_AG01\_SoLexa\_Mi2008\_2\_11884\_hit1

5' CUG-GAAUGUUCGAGGUUUC  
 || ||| |||  
 AACUCUAAAAGCUCCAAAG 5'  
 AT5G36930.1 332 351  
 disease resistance like protein

SRNA\_AG01\_SoLexa\_Mi2008\_2\_11884\_hit1

5' CUG-GAAUGUUCGAGGUUUC  
 || ||| |||  
 AACUCUAAAAGCUCCAAAG 5'  
 AT5G36930.2 356 375  
 disease resistance like protein

SRNA\_AG01\_SoLexa\_Mi2008\_1\_21284\_hit1

5' UAGAGAUUGGUGGUGA-GCAUC  
 ||| |||  
 AUCUAUAACCACCACUCCG-AG 5'  
 AT5G37020.2 1513 1533  
 auxin response factor 8 (ARF8)

stems\_1sup\_AG01\_SoLexa\_Mi\_Cell\_2008\_hit\_target\_site.txt

sRNA\_AG01\_SoLexa\_Mi2008\_1\_11678\_hit1

5' CUGCAACUGUUGAAGAU--CCA  
 ||||| ||||| ||||| ||||| |||||  
 GACGGUGACAACUUCUACCGGU 5'  
 AT5G37020.2 1749 1770  
 auxin response factor 8 (ARF8)

sRNA\_AG01\_SoLexa\_Mi2008\_1\_38941\_hit1

5' UGCGGAUUUCCGGGUUCUAGAG  
 ||||| ||||| ||||| ||||| |||||  
 ACGCCUAAAGGCCCAAGAUCUC 5'  
 AT5G37020.2 2005 2026  
 auxin response factor 8 (ARF8)

sRNA\_AG01\_SoLexa\_Mi2008\_1\_34515\_hit1

5' UGAAGAAGCAAUG-GGGUA  
 ||||| ||||| ||||| ||||| |||||  
 ACUUCUUCGUUU-CGCCCU 5'  
 AT5G37020.2 2085 2103  
 auxin response factor 8 (ARF8)

sRNA\_AG01\_SoLexa\_Mi2008\_4\_2102\_hit1

5' AGCUGCCAGCAUGAUCUAU  
 ||||| ||||| ||||| ||||| |||||  
 UCGACGGUCGGACUAGAUU 5'  
 AT5G37020.2 2368 2386  
 auxin response factor 8 (ARF8)

sRNA\_AG01\_SoLexa\_Mi2008\_4\_13484\_hit1

5' GAAGCUGCCAGCAUGAUCUAU  
 ||||| ||||| ||||| ||||| |||||  
 GUUCGACGGUCGGACUAGAUU 5'  
 AT5G37020.2 2368 2388  
 auxin response factor 8 (ARF8)

sRNA\_AG01\_SoLexa\_Mi2008\_61\_34692\_hit1

5' UGAAGCUGCCAGCAUGAUCUAA  
 ||||| ||||| ||||| ||||| |||||  
 UGUUCGACGGUCGGACUAGAUU 5'  
 AT5G37020.2 2368 2389  
 auxin response factor 8 (ARF8)

sRNA\_AG01\_SoLexa\_Mi2008\_13\_873\_hit2

5' AAGCUGCCAGCAUGAUCUA  
 ||||| ||||| ||||| ||||| |||||  
 UUCGACGGUCGGACUAGAU 5'  
 AT5G37020.2 2369 2387  
 auxin response factor 8 (ARF8)

sRNA\_AG01\_SoLexa\_Mi2008\_1\_874\_hit1

5' AAGCUGCCAGCAUGAUCUG  
 ||||| ||||| ||||| ||||| |||||  
 UUCGACGGUCGGACUAGAU 5'  
 AT5G37020.2 2369 2387  
 auxin response factor 8 (ARF8)

sRNA\_AG01\_SoLexa\_Mi2008\_1\_4776\_hit1

5' CAAGCUGCCAGCCUGAUCUA  
 ||||| ||||| ||||| ||||| |||||  
 GUUCGACGGUCGGACUAGAU 5'  
 AT5G37020.2 2369 2388  
 auxin response factor 8 (ARF8)

stems\_1sup\_AG01\_SoLexa\_Mi\_Cell\_2008\_hit\_target\_site.txt

SRNA\_AG01\_SoLexa\_Mi2008\_1519\_13483\_hit2

5' GAAGCUGCCAGCAUGAUCUA  
 |||  
 GUUCGACGGUCGGACUAGAU 5'  
 AT5G37020.2 2369 2388  
 auxin response factor 8 (ARF8)

SRNA\_AG01\_SoLexa\_Mi2008\_3\_13485\_hit1

5' GAAGCUGCCAGCAUGAUCUG  
 |||  
 GUUCGACGGUCGGACUAGAU 5'  
 AT5G37020.2 2369 2388  
 auxin response factor 8 (ARF8)

SRNA\_AG01\_SoLexa\_Mi2008\_344873\_34691\_hit2

5' UGAAGCUGCCAGCAUGAUCUA  
 |||  
 UGUUCGACGGUCGGACUAGAU 5'  
 AT5G37020.2 2369 2389  
 auxin response factor 8 (ARF8)

SRNA\_AG01\_SoLexa\_Mi2008\_54\_13482\_hit3

5' GAAGCUGCCAGCAUGAUCU  
 |||  
 GUUCGACGGUCGGACUAGA 5'  
 AT5G37020.2 2370 2388  
 auxin response factor 8 (ARF8)

SRNA\_AG01\_SoLexa\_Mi2008\_7845\_34690\_hit3

5' UGAAGCUGCCAGCAUGAUCU  
 |||  
 UGUUCGACGGUCGGACUAGA 5'  
 AT5G37020.2 2370 2389  
 auxin response factor 8 (ARF8)

SRNA\_AG01\_SoLexa\_Mi2008\_17\_46569\_hit1

5' UUAAGCUGCCAGCAUGAUCU  
 :|||  
 UGUUCGACGGUCGGACUAGA 5'  
 AT5G37020.2 2370 2389  
 auxin response factor 8 (ARF8)

SRNA\_AG01\_SoLexa\_Mi2008\_6340\_34689\_hit3

5' UGAAGCUGCCAGCAUGAUC  
 |||  
 UGUUCGACGGUCGGACUAG 5'  
 AT5G37020.2 2371 2389  
 auxin response factor 8 (ARF8)

SRNA\_AG01\_SoLexa\_Mi2008\_8\_46568\_hit1

5' UUAAGCUGCCAGCAUGAUC  
 :|||  
 UGUUCGACGGUCGGACUAG 5'  
 AT5G37020.2 2371 2389  
 auxin response factor 8 (ARF8)

SRNA\_AG01\_SoLexa\_Mi2008\_1\_38269\_hit1

5' UGCAUGUGCAGUAGCAUCAAG  
 |||:|||  
 UCGUACACGUCGUCGUUC 5'  
 AT5G37020.2 867 887  
 auxin response factor 8 (ARF8)

stems\_1sup\_AG01\_SoLexa\_Mi\_Cell\_2008\_hit\_target\_site.txt

SRNA\_AG01\_SoLexa\_Mi2008\_1\_47627\_hit1

```
5' UUAGCUAGCAGAAGCAUGUGCA
   |||| | |||||
   AAUCAA-CGUCUUCGUACACGU 5'
AT5G37020.2      879      899
auxin response factor 8 (ARF8)
```

SRNA\_AG01\_SoLexa\_Mi2008\_1\_51898\_hit5

```
5' UUGCUIUUCUUGAUGGAUACUCA
   ||||| ||||| || |||
   AACGAAAGAACUAC-UA-GAGC 5'
AT5G37600.1      974      993
glutamate--ammonia ligase
```

SRNA\_AG01\_SoLexa\_Mi2008\_13\_4545\_hit1

```
5' CAAGAAAGAUGGUUGUCGUU
   ||||| |||||
   ACUCUUUCAACCAACAGCAA 5'
AT5G39050.1      534      553
Anthocyanin acyltransferase - like protein
```

SRNA\_AG01\_SoLexa\_Mi2008\_1\_13420\_hit2

```
5' GAAGAAGAAGAAGACUCUU
   || |||||
   CUCCUUCUUCUUCUGAGAA 5'
AT5G39050.1      830      848
Anthocyanin acyltransferase - like protein
```

SRNA\_AG01\_SoLexa\_Mi2008\_1\_4090\_hit1

```
5' CA-AAGAGUAGACAAUCAUCA
   || |||||:||||| |||
   GUAUUCUCAUUUGUUAGU-GUU 5'
AT5G39050.1      888      908
Anthocyanin acyltransferase - like protein
```

SRNA\_AG01\_SoLexa\_Mi2008\_1\_10\_hit1

```
5' AAAAAAAGUAGAUGUUGGU
   ||||| ||||| |
   UUUUUUUUCAUCUACAAAGA 5'
AT5G39220.1      1254     1273
unknown protein
```

SRNA\_AG01\_SoLexa\_Mi2008\_1\_1790\_hit2

```
5' AGAACAAGUGGUAGAUACAC
   ||||| |||||
   ACUUGUUCACCAAACUAUGUC 5'
AT5G39220.1      306      326
unknown protein
```

SRNA\_AG01\_SoLexa\_Mi2008\_1\_41315\_hit1

```
5' UGGCCGCAACAGAGGUG-AUGAG
   ||||| ||||| | |||
   ACCGGCGUUAUCUCCACGUUCUC 5'
AT5G39680.1      2193     2215
unknown protein
```

SRNA\_AG01\_SoLexa\_Mi2008\_2\_19236\_hit1

```
5' UACACAACAUCUGAUGGACUA
   ||||| |||||
   UUGUGUUCUAGACUACCUGAA 5'
AT5G40450.2      1334     1354
unknown protein
```

stems\_1sup\_AG01\_SoLexa\_Mi\_Cell\_2008\_hit\_target\_site.txt

SRNA\_AG01\_SoLexa\_Mi2008\_6\_10413\_hit1

5' CUAGUUCGUCGAUAUGUU  
 || |||||  
 GA-CAAGCAGCUAUA-AAG 5'  
 AT5G40450.2 2425 2441  
 unknown protein

SRNA\_AG01\_SoLexa\_Mi2008\_1\_32975\_hit1

5' UCUAGUUCGUCGAUAUGUU  
 ||| |||||  
 AGA-CAAGCAGCUAUA-AA 5'  
 AT5G40450.2 2426 2442  
 unknown protein

SRNA\_AG01\_SoLexa\_Mi2008\_1\_39819\_hit1

5' UGGAUUAUUUCAGGAUAGGU  
 ||||| || ||||  
 ACCUUAUUAAAG-CC-AUCCC 5'  
 AT5G40450.2 4704 4722  
 unknown protein

SRNA\_AG01\_SoLexa\_Mi2008\_2\_38233\_hit2

5' UGCAUCUACCACAUUCAUCUA  
 |||| ||||| |||||  
 ACGUUGAUGGAGUAAGUAGAG 5'  
 AT5G40450.2 6330 6350  
 unknown protein

SRNA\_AG01\_SoLexa\_Mi2008\_3\_13459\_hit1

5' GAAGAUGAUUGUACAAUG-UA  
 |||| ||||| || ||  
 CUUCCACUAUACAUGUU-CUAU 5'  
 AT5G40480.1 1134 1154  
 nuclear pore protein -like

SRNA\_AG01\_SoLexa\_Mi2008\_1\_27991\_hit1

5' UCAGAAACCCUAAUUUCGUGGG  
 ||| ||||| |||:  
 AGUUUUUGGGAUUAAGAACCU 5'  
 AT5G40480.1 1489 1510  
 nuclear pore protein -like

SRNA\_AG01\_SoLexa\_Mi2008\_1\_36711\_hit4

5' UGAGUAGCAAGAGAUGGAGAAA  
 |||| ||||| |||||  
 ACUC-UCGUUCUCUCCUCUUU 5'  
 AT5G40480.1 154 174  
 nuclear pore protein -like

SRNA\_AG01\_SoLexa\_Mi2008\_1\_53211\_hit1

5' UUGGUUGGUUC-UUGACAGUCA  
 ||||| || |||||  
 AACCAACCA-GUAACUGUCAGA 5'  
 AT5G40480.1 4607 4627  
 nuclear pore protein -like

SRNA\_AG01\_SoLexa\_Mi2008\_1\_37419\_hit1

5' UGAUGGUGUUCGUGGUAGGUUC  
 ||||| ||| ||:|  
 ACUACCACAAGAACC-UCUAAG 5'  
 AT5G40480.1 5773 5793  
 nuclear pore protein -like



stems\_1sup\_AG01\_SoLexa\_Mi\_Cell\_2008\_hit\_target\_site.txt

SRNA\_AG01\_SoLexa\_Mi2008\_1\_8040\_hit1

5' CCGGAGAAGCAGCUGA-UUGGU  
||| ||||| ||||| ||||| |||||  
GGC-UCUUCGUCGACUCAACUA 5'  
AT5G45060.1 2954 2974  
disease resistance protein-like

SRNA\_AG01\_SoLexa\_Mi2008\_1\_6472\_hit1

5' CAGGAGG-AGAAAGAGUAGGUU  
||||||| ||||| ||||| |||||  
GUCCUCCUCUUUCUCAUCCUC 5'  
AT5G49280.1 30 51  
predicted GPI-anchored protein

SRNA\_AG01\_SoLexa\_Mi2008\_1\_27863\_hit1

5' UCACUAAU-GACAAUGAGUGUC  
||| ||||| ||||| ||||| |||||  
AGU-AUUAUCUGUUACUCACAA 5'  
AT5G50160.1 1170 1190  
FRO1 and FRO2-like protein

SRNA\_AG01\_SoLexa\_Mi2008\_1\_53198\_hit1

5' UUGGUUGCGAUGAUGAUGUUG  
||| ||| ||||| ||||| |||||  
AAC-AAC-CUACUACUACAAC 5'  
AT5G50160.1 296 314  
FRO1 and FRO2-like protein

SRNA\_AG01\_SoLexa\_Mi2008\_1\_21052\_hit1

5' UAGACCAAACCUUGAUAGU  
||||||| ||||| ||||| |||||  
AUCUGUUUGGA-AC-AUCG 5'  
AT5G50160.1 527 544  
FRO1 and FRO2-like protein

SRNA\_AG01\_SoLexa\_Mi2008\_1\_13614\_hit8

5' GACAGAAGAGAGAGAGCAC  
|| ||||| ||||| ||||| |||||  
CU-UCUUCUCUCUCU-GUA 5'  
AT5G50160.1 556 572  
FRO1 and FRO2-like protein

SRNA\_AG01\_SoLexa\_Mi2008\_2\_8245\_hit1

5' CGAAAAGAAGAAGAUGAUGAG  
||||||| ||||| ||||| |||||  
GCUUUUCUUCUUCU-CU-CUC 5'  
AT5G50160.1 560 578  
FRO1 and FRO2-like protein

SRNA\_AG01\_SoLexa\_Mi2008\_24\_11800\_hit1

5' CUGCUAGAGGUAACCAUUUGCU  
|||| ||| ||||| ||||| |||||  
GACGCUCUACAUUGGUAACGC 5'  
AT5G50400.1 1248 1269  
putative protein

SRNA\_AG01\_SoLexa\_Mi2008\_2\_5417\_hit28

5' CACCAAGAAGAUGAGUCUC  
||| ||||| ||||| ||||| |||||  
GUG-UUCUUCUACUCAGCU 5'  
AT5G50400.1 498 515  
putative protein

stems\_1sup\_AG01\_SoLexa\_Mi\_Cell\_2008\_hit\_target\_site.txt

SRNA\_AG01\_SoLexa\_Mi2008\_6\_3355\_hit1

5' AUGGUAGUUCAAGUAUUC  
:|||||  
CGCCAUCAAGUUCA-AAGG 5'  
AT5G51750.1 2082 2099  
serine protease-like protein

SRNA\_AG01\_SoLexa\_Mi2008\_2\_4398\_hit4

5' CAACAUUGGUGCUAGA-GAUGC  
|||||  
GUUGUAACCACGAU-UACAACG 5'  
AT5G51950.2 142 162  
unknown protein

SRNA\_AG01\_SoLexa\_Mi2008\_2\_4398\_hit4

5' CAACAUUGGUGCUAGA-GAUGC  
|||||  
GUUGUAACCACGAU-UACAACG 5'  
AT5G51950.1 155 175  
unknown protein

SRNA\_AG01\_SoLexa\_Mi2008\_1\_45652\_hit1

5' UGUGUCUAUGAGCAGCAUGGU  
|||||:|||  
ACACAGAUACUGGUCGUGCCA 5'  
AT5G51950.2 646 666  
unknown protein

SRNA\_AG01\_SoLexa\_Mi2008\_1\_45652\_hit1

5' UGUGUCUAUGAGCAGCAUGGU  
|||||:|||  
ACACAGAUACUGGUCGUGCCA 5'  
AT5G51950.1 659 679  
unknown protein

SRNA\_AG01\_SoLexa\_Mi2008\_1\_42409\_hit1

5' UGGGGGACAGUUUUGCAUGUA  
|||||  
ACCCCUUGUCAAAACGUACAU 5'  
AT5G53420.3 188 208  
unknown protein

SRNA\_AG01\_SoLexa\_Mi2008\_1\_31134\_hit1

5' UCGAUCAACGGUUGAGA-UGGU  
|||||:|||  
UGCAGUUGCCAAUUCUAACCA 5'  
AT5G53420.2 194 215  
unknown protein

SRNA\_AG01\_SoLexa\_Mi2008\_1\_36778\_hit1

5' UGAG-UCUUCGAAUUG-UGAACA  
|||||  
ACUCCAGAAGCUUACAACUUUAU 5'  
AT5G53420.3 212 234  
unknown protein

SRNA\_AG01\_SoLexa\_Mi2008\_1\_31134\_hit1

5' UCGAUCAACGGUUGAGA-UGGU  
|||||:|||  
UGCAGUUGCCAAUUCUAACCA 5'  
AT5G53420.3 356 377  
unknown protein

stems\_1sup\_AG01\_SoLexa\_Mi\_Cell\_2008\_hit\_target\_site.txt

SRNA\_AG01\_SoLexa\_Mi2008\_6\_14059\_hit1

5' GAG-GA-GAAUGUUGAGAAUG  
 ||| || ||| |||||  
 CUCUCUUCUUUCAACUCUUAC 5'  
 AT5G53730.1 186 206  
 putative protein

SRNA\_AG01\_SoLexa\_Mi2008\_1\_3901\_hit3

5' CAAAACGAAGAAGAUGAUGAG  
 | ||||| |||||  
 GGUUUGCUCUUCUACUACUC 5'  
 AT5G53730.1 214 234  
 putative protein

SRNA\_AG01\_SoLexa\_Mi2008\_1\_37225\_hit4

5' UGAUGAUGAUGAUGAUGAAGAAG  
 ||| |||||  
 ACU-CUACUACUACUUCUUC 5'  
 AT5G53730.1 68 89  
 putative protein

SRNA\_AG01\_SoLexa\_Mi2008\_1\_13759\_hit1

5' GACGAUGAUGAUGAUGACA  
 || |||||  
 CU-CUACUACUACUUC 5'  
 AT5G53730.1 71 88  
 putative protein

SRNA\_AG01\_SoLexa\_Mi2008\_5\_13760\_hit2

5' GACGAUGAUGAUGAUGAGC  
 || |||||:  
 CU-CUACUACUACUUC 5'  
 AT5G53730.1 71 88  
 putative protein

SRNA\_AG01\_SoLexa\_Mi2008\_1\_36323\_hit13

5' UGAG-GAUGAUGAUGAUGAUGA  
 |||| || |||||  
 ACUCUCU-CUACUACUACUACU 5'  
 AT5G53730.1 73 93  
 putative protein

SRNA\_AG01\_SoLexa\_Mi2008\_1\_41417\_hit1

5' UGGCGAGAGUGAUGAUGAUGU  
 ||| ||||| |||||  
 ACCUCUCUCUCUACUACUACU 5'  
 AT5G53730.1 75 95  
 putative protein

SRNA\_AG01\_SoLexa\_Mi2008\_4\_15683\_hit7

5' GUCGAAAUCAGGAAAUCUCC  
 || ||||| |||||  
 CA-CUUUAGUCAUUUAGAGC 5'  
 AT5G57340.1 1197 1215  
 unknown protein

SRNA\_AG01\_SoLexa\_Mi2008\_1\_26111\_hit1

5' UAUGUUCUCUAAAUCGAUUGGA  
 ||||| ||||| | ||||  
 AUACAAGUGAUUUAG-UUACCU 5'  
 AT5G57340.2 455 475  
 unknown protein

stems\_1sup\_AG01\_SoLexa\_Mi\_Cell\_2008\_hit\_target\_site.txt

SRNA\_AG01\_SoLexa\_Mi2008\_2\_4149\_hit1

5' CAAAGGCAGAAGAUGAUGACAG  
| | | | | | | | | | | | | | | | | | :  
GUUUCGGUAUUCUACUACUGAU 5'  
AT5G59780.1 1022 1043  
MYB27 protein - like

SRNA\_AG01\_SoLexa\_Mi2008\_1\_29192\_hit1

5' UCCAAAGGCAGAAGAUGAUGA  
| | | | | | | | | | | | | | | | | | :  
UUGUUUCGGUAUUCUACUACU 5'  
AT5G59780.1 1025 1045  
MYB27 protein - like

SRNA\_AG01\_SoLexa\_Mi2008\_1\_42751\_hit2

5' UGGGUGGUGA-UUGUGAGUGUAA  
| | | | | | | | | | | | | | | | | | :  
ACCCACCACUAAAAACU-ACAUU 5'  
AT5G59780.3 865 886  
MYB27 protein - like

SRNA\_AG01\_SoLexa\_Mi2008\_1\_42751\_hit2

5' UGGGUGGUGA-UUGUGAGUGUAA  
| | | | | | | | | | | | | | | | | | :  
ACCCACCACUAAAAACU-ACAUU 5'  
AT5G59780.2 890 911  
MYB27 protein - like

SRNA\_AG01\_SoLexa\_Mi2008\_2\_4149\_hit1

5' CAAAGGCAGAAGAUGAUGACAG  
| | | | | | | | | | | | | | | | | | :  
GUUUCGGUAUUCUACUACUGAU 5'  
AT5G59780.3 904 925  
MYB27 protein - like

SRNA\_AG01\_SoLexa\_Mi2008\_1\_29192\_hit1

5' UCCAAAGGCAGAAGAUGAUGA  
| | | | | | | | | | | | | | | | | | :  
UUGUUUCGGUAUUCUACUACU 5'  
AT5G59780.3 907 927  
MYB27 protein - like

SRNA\_AG01\_SoLexa\_Mi2008\_2\_4149\_hit1

5' CAAAGGCAGAAGAUGAUGACAG  
| | | | | | | | | | | | | | | | | | :  
GUUUCGGUAUUCUACUACUGAU 5'  
AT5G59780.2 929 950  
MYB27 protein - like

SRNA\_AG01\_SoLexa\_Mi2008\_1\_29192\_hit1

5' UCCAAAGGCAGAAGAUGAUGA  
| | | | | | | | | | | | | | | | | | :  
UUGUUUCGGUAUUCUACUACU 5'  
AT5G59780.2 932 952  
MYB27 protein - like

SRNA\_AG01\_SoLexa\_Mi2008\_1\_42751\_hit2

5' UGGGUGGUGA-UUGUGAGUGUAA  
| | | | | | | | | | | | | | | | | | :  
ACCCACCACUAAAAACU-ACAUU 5'  
AT5G59780.1 983 1004  
MYB27 protein - like

stems\_1sup\_AG01\_SoLexa\_Mi\_Cell\_2008\_hit\_target\_site.txt

SRNA\_AG01\_SoLexa\_Mi2008\_1\_27291\_hit3

5' UCAAGGUUGGUGGACCUCUCA  
 |||  
 AGUCCAACCAACUGGAGAGU 5'

AT5G60390.3 664 684  
 translation elongation factor eEF-1 alpha chain (gene A4)

SRNA\_AG01\_SoLexa\_Mi2008\_1\_27291\_hit3

5' UCAAGGUUGGUGGACCUCUCA  
 |||  
 AGUCCAACCAACUGGAGAGU 5'

AT5G60390.2 674 694  
 translation elongation factor eEF-1 alpha chain (gene A4)

SRNA\_AG01\_SoLexa\_Mi2008\_7\_12746\_hit1

5' CUUGACCUUGUAAGACCCC  
 |||:|  
 GAACUGGAACGUUCUGGAA 5'

AT5G60450.1 1873 1891  
 auxin response factor 4

SRNA\_AG01\_SoLexa\_Mi2008\_7\_49852\_hit1

5' UUCUUGACCUUGUAAGACCCC  
 |||:|  
 AAGAACUGGAACGUUCUGGAA 5'

AT5G60450.1 1873 1893  
 auxin response factor 4

SRNA\_AG01\_SoLexa\_Mi2008\_4\_55012\_hit1

5' UUUCUUGACCUUGUAAGACCCC  
 |||:|  
 AAAGAACUGGAACGUUCUGGAA 5'

AT5G60450.1 1873 1894  
 auxin response factor 4

SRNA\_AG01\_SoLexa\_Mi2008\_1\_55011\_hit1

5' UUUCUUGACCUUGUAAGACCCC  
 |||:|  
 AAAGAACUGGAACGUUCUGGA 5'

AT5G60450.1 1874 1894  
 auxin response factor 4

SRNA\_AG01\_SoLexa\_Mi2008\_19\_29991\_hit1

5' UCCGGCGGUUCAUAACAUC  
 |||  
 AGGCCGCAAGUAUUGUAGUU 5'

AT5G60450.1 1925 1945  
 auxin response factor 4

SRNA\_AG01\_SoLexa\_Mi2008\_2\_24987\_hit1

5' UAUCGGCGGUUCAUAACAUC  
 |||  
 AUAGGCCGCAAGUAUUGUAG 5'

AT5G60450.1 1927 1947  
 auxin response factor 4

SRNA\_AG01\_SoLexa\_Mi2008\_8\_4564\_hit1

5' CAAGAACUGGAUUUGCAUGAGA  
 |||  
 GUUCUUGACCUAAACGUACUCU 5'

AT5G60450.1 1966 1987  
 auxin response factor 4

stems\_1sup\_AG01\_SoLexa\_Mi\_Cell\_2008\_hit\_target\_site.txt

SRNA\_AG01\_SoLexa\_Mi2008\_7\_4563\_hit1

5' CAAGAACUGGAUUUGCAUGAG  
|||||  
GUUCUUGACCUAAACGUACUC 5'  
AT5G60450.1 1967 1987  
auxin response factor 4

SRNA\_AG01\_SoLexa\_Mi2008\_1\_34330\_hit1

5' UGAACAAGCUGGGUUCACGCC  
|||||  
ACUUGUUCGACCCAAGUGCGG 5'  
AT5G60450.1 2035 2055  
auxin response factor 4

SRNA\_AG01\_SoLexa\_Mi2008\_7\_33918\_hit1

5' UCUUGACCUUGUAAGACCCCA  
|||||:|||||  
AGAACUGGAACGUUCUGGGAA 5'  
AT5G60450.1 2082 2102  
auxin response factor 4

SRNA\_AG01\_SoLexa\_Mi2008\_7\_49853\_hit1

5' UUCUUGACCUUGUAAGACCCCA  
|||||:|||||  
AAGAACUGGAACGUUCUGGGAA 5'  
AT5G60450.1 2082 2103  
auxin response factor 4

SRNA\_AG01\_SoLexa\_Mi2008\_7\_12746\_hit1

5' CUUGACCUUGUAAGACCCC  
|||||:|||||  
GAACUGGAACGUUCUGGGA 5'  
AT5G60450.1 2083 2101  
auxin response factor 4

SRNA\_AG01\_SoLexa\_Mi2008\_7\_49852\_hit1

5' UUCUUGACCUUGUAAGACCCC  
|||||:|||||  
AAGAACUGGAACGUUCUGGGA 5'  
AT5G60450.1 2083 2103  
auxin response factor 4

SRNA\_AG01\_SoLexa\_Mi2008\_4\_55012\_hit1

5' UUUCUUGACCUUGUAAGACCCC  
|||||:|||||  
AAAGAACUGGAACGUUCUGGGA 5'  
AT5G60450.1 2083 2104  
auxin response factor 4

SRNA\_AG01\_SoLexa\_Mi2008\_1\_55011\_hit1

5' UUUCUUGACCUUGUAAGACCC  
|||||:|||||  
AAAGAACUGGAACGUUCUGGG 5'  
AT5G60450.1 2084 2104  
auxin response factor 4

SRNA\_AG01\_SoLexa\_Mi2008\_2\_34797\_hit1

5' UGAAGGGGGACCCGAGGAUUG  
|||||  
ACUUCUUUUUGGGCUCCUAAC 5'  
AT5G60450.1 2266 2286  
auxin response factor 4

stems\_1sup\_AG01\_SoLexa\_Mi\_Cell\_2008\_hit\_target\_site.txt

SRNA\_AG01\_SoLexa\_Mi2008\_3\_13421\_hit1

5' GAAGAAGAAGAUGAUGUUGAU  
 |||||  
 CUUCUUCUUCUUCUACCACUU 5'  
 AT5G60450.1 621 641  
 auxin response factor 4

SRNA\_AG01\_SoLexa\_Mi2008\_1\_7242\_hit1

5' CAUGGAGAAGAAGAAUGA-GGU  
 ||||:|||||  
 GUACUUCUUCUUCU-CUACCA 5'  
 AT5G60450.1 625 645  
 auxin response factor 4

SRNA\_AG01\_SoLexa\_Mi2008\_1\_25289\_hit1

5' UAUGACGAUGAUGAUGACGGA  
 :|||||  
 GUACUGCUACUACUA-GGCCU 5'  
 AT5G60450.1 650 669  
 auxin response factor 4

SRNA\_AG01\_SoLexa\_Mi2008\_9\_14254\_hit8

5' GAUGAUGAUGAUGAUGAUCUU  
 |||||:|||||  
 CUACUACUGCUACUACUAGGC 5'  
 AT5G60450.1 651 671  
 auxin response factor 4

SRNA\_AG01\_SoLexa\_Mi2008\_7\_3078\_hit1

5' AUGAUGAUGA-GAAUGAUGAU  
 |||||  
 AACUACUACUGCU-ACUACUA 5'  
 AT5G60450.1 655 674  
 auxin response factor 4

SRNA\_AG01\_SoLexa\_Mi2008\_1\_45039\_hit3

5' UGU-GAUGAUGAUGAUGAUGAUGA  
 ||| || |||||:|||||  
 ACAUCUUCUACUACUGCUACUACU 5'  
 AT5G60450.1 656 679  
 auxin response factor 4

SRNA\_AG01\_SoLexa\_Mi2008\_1\_10092\_hit1

5' CUAGAAGAUGAUGACGAUUGA  
 |||||  
 GAUCUUCUACUACUGCUA-CU 5'  
 AT5G60450.1 659 678  
 auxin response factor 4

SRNA\_AG01\_SoLexa\_Mi2008\_3\_35894\_hit1

5' UGAGAGCAGAGAAAGAGAGU  
 |||||  
 ACUCUC-UCUCUUUCUCUCC 5'  
 AT5G60450.1 67 85  
 auxin response factor 4

SRNA\_AG01\_SoLexa\_Mi2008\_2\_16\_hit1

5' AAAAAAA-GAGAGGGACGAA  
 |||||  
 UUUUUUUACUCUCCU-CUC 5'  
 AT5G61960.1 101 119  
 Mei2-like protein

stems\_1sup\_AG01\_SoIexa\_Mi\_Cell\_2008\_hit\_target\_site.txt

sRNA\_AG01\_SoIexa\_Mi2008\_5\_39770\_hit1

```
5' UGGAAGGCAGAUUAUCUACA
   ||||| ||||| ||||| ||||| |||||
   ACCUUCGGUCUACUAAGAUCU 5'
```

AT5G61960.2 2070 2090  
Mei2-like protein

sRNA\_AG01\_SoIexa\_Mi2008\_5\_39770\_hit1

```
5' UGGAAGGCAGAUUAUCUACA
   ||||| ||||| ||||| ||||| |||||
   ACCUUCGGUCUACUAAGAUCU 5'
```

AT5G61960.1 2547 2567  
Mei2-like protein



roots\_1sup\_AG01\_SoLexa\_Mi\_Cell\_2008\_hit\_target\_site.txt

SRNA\_AG01\_SoLexa\_Mi2008\_67\_56166\_hit1

5' UUUGUGUUCUCAGGUCACCCC  
||||| ||||||| |||||  
AAACACUAGAGUCCUUUGGGG 5'  
AT1G08830.1 118 138  
superoxidase dismutase

SRNA\_AG01\_SoLexa\_Mi2008\_2\_20015\_hit3

5' UACGAAAGGAGAAGCGGUUGA  
|||:||||:||||:|||||||  
AUGUUUUCUUCUUUGCCAACU 5'  
AT1G12110.1 676 696  
nitrate/chlorate transporter CHL1

SRNA\_AG01\_SoLexa\_Mi2008\_1\_1909\_hit1

5' AGAGCA-AUCGUGAAGAUGGAU  
|||| | ||| |||||||||  
UCUC-UGUAGAACUUCUACCUA 5'  
AT1G12110.1 96 116  
nitrate/chlorate transporter CHL1

SRNA\_AG01\_SoLexa\_Mi2008\_1\_1059\_hit1

5' AAU-GAAAGUAGAGAGAGCU  
||| ||||||| ||||||| |  
UUAACUUUCAUGUCUCUCA 5'  
AT1G12520.1 1109 1128  
Cu/Zn superoxide dismutase copper chaperone like protein

SRNA\_AG01\_SoLexa\_Mi2008\_1\_1059\_hit1

5' AAU-GAAAGUAGAGAGAGCU  
||| ||||||| ||||||| |  
UUAACUUUCAUGUCUCUCA 5'  
AT1G12520.2 1178 1197  
Cu/Zn superoxide dismutase copper chaperone like protein

SRNA\_AG01\_SoLexa\_Mi2008\_1\_1059\_hit1

5' AAU-GAAAGUAGAGAGAGCU  
||| ||||||| ||||||| |  
UUAACUUUCAUGUCUCUCA 5'  
AT1G12520.3 1194 1213  
Cu/Zn superoxide dismutase copper chaperone like protein

SRNA\_AG01\_SoLexa\_Mi2008\_2\_36207\_hit1

5' UGAGCUUGAUGGUUUAUGAA  
||||||||| |:|||||||  
ACUCGAACUACGGUUAUCUU 5'  
AT1G30700.1 92 112  
putative reticuline oxidase-like protein

SRNA\_AG01\_SoLexa\_Mi2008\_13\_50200\_hit2

5' UUGAAUUGAAGUCUUGAA  
||||||| ||||||||| |  
AACUUAAGUUCACGAACGU 5'  
AT1G52060.1 355 373  
null

SRNA\_AG01\_SoLexa\_Mi2008\_2\_13262\_hit1

5' CUUUUAGUAGUCGAUGUU-AUA  
|||| ||||||||| |||||  
UAAAAGCAUCAGCUACAACU 5'  
AT1G52060.1 639 660  
null

roots\_1sup\_AG01\_SoLexa\_Mi\_Cell\_2008\_hit\_target\_site.txt

SRNA\_AG01\_SoLexa\_Mi2008\_1\_34289\_hit2

5' UGAAAUCGAUGUUGU-AAGUCC  
 :||||||| || |||||  
 GCUUUAGCUACAUAUUUCAGG 5'  
 AT1G52400.2 1567 1588  
 beta-glucosidase, putative

SRNA\_AG01\_SoLexa\_Mi2008\_4\_11921\_hit1

5' CUGGAUCGAAGCAUUUCUC  
 ||||| || |||||  
 UACCUAGCAUCAUAAAGAG 5'  
 AT1G52790.1 447 465  
 putative oxidoreductase

SRNA\_AG01\_SoLexa\_Mi2008\_1\_20703\_hit1

5' UACUUGAUGAGUUGCAUGGUU  
 ||||| ||||| ||| |||  
 AUGAACUUCUCAAGGUAACAA 5'  
 AT1G52790.1 780 800  
 putative oxidoreductase

SRNA\_AG01\_SoLexa\_Mi2008\_7\_7022\_hit1

5' CAUCCAUCUAAUUCAGUGCU  
 ||||| | |||||  
 GUAGGUUAAGAAGUUCACGA 5'  
 AT1G52790.1 92 112  
 putative oxidoreductase

SRNA\_AG01\_SoLexa\_Mi2008\_1\_49761\_hit2

5' UUCUGAAAUUAAUGUGAAUUU  
 || ||||| || |||||  
 AA-ACUUUAAUAACUCUAAAA 5'  
 AT1G52820.1 1015 1034  
 oxidoreductase-like protein

SRNA\_AG01\_SoLexa\_Mi2008\_1\_46059\_hit1

5' UGUUGUGCUGAAAUGAUGUU  
 ||||| |||||  
 ACAACACGACUUUGACUACAA 5'  
 AT1G52820.1 402 422  
 oxidoreductase-like protein

SRNA\_AG01\_SoLexa\_Mi2008\_1\_699\_hit1

5' AACGCCGUGAUUGUU-UGGU  
 |||| ||||| ||:|  
 UUGCUGCACUAACAACACUA 5'  
 AT1G55020.1 340 359  
 unknown protein

SRNA\_AG01\_SoLexa\_Mi2008\_12\_46414\_hit1

5' UUAACGCCGUGAUUGUU-UGGU  
 ||||| ||||| ||:|  
 AAUUGCUGCACUAACAACACUA 5'  
 AT1G55020.1 340 361  
 unknown protein

SRNA\_AG01\_SoLexa\_Mi2008\_1\_28726\_hit1

5' UCAGUGUGGAAGCUAAGUCUC  
 ||| ||||| |||||  
 AGU-ACACCUUCUAUUCAGAA 5'  
 AT1G55020.1 577 596  
 unknown protein



roots\_1sup\_AG01\_SoLexa\_Mi\_Cell\_2008\_hit\_target\_site.txt

SRNA\_AG01\_SoLexa\_Mi2008\_1\_39739\_hit2

5' UGGAAGAU-GGAGUGAUGCCUC  
||| ||||| |||||||||||||  
ACCAUCUAUCCUCACUACGGAC 5'  
AT1G77760.1 2465 2486  
nitrate reductase 1 (NR1)

SRNA\_AG01\_SoLexa\_Mi2008\_93\_9914\_hit1

5' CUACCAGCCGUUGA-UCAUGCU  
||| ||||||||||| |||| ||  
GAUAGUCGGCAACUAAGUA-GA 5'  
AT1G77760.1 384 404  
nitrate reductase 1 (NR1)

SRNA\_AG01\_SoLexa\_Mi2008\_3\_40895\_hit1

5' UGGAUGAUGAGAGAGAGAU  
|| |||||:|||||||||||  
CCC-ACUAAUUCUCUCUCUA 5'  
AT1G77760.1 45 62  
nitrate reductase 1 (NR1)

SRNA\_AG01\_SoLexa\_Mi2008\_5\_10942\_hit1

5' CUCCUUUGUAAAAAG-UGUC  
||||||||||||| || |||  
GAGGAAACAUUU-UCAACAC 5'  
AT2G19500.1 774 792  
cytokinin oxidase (CKX2)

SRNA\_AG01\_SoLexa\_Mi2008\_9\_724\_hit1

5' AACUCGUGUUGCUUGACUU  
||| |||||||||||||||  
UUG-GCACAACGAACUGAU 5'  
AT2G19500.1 920 937  
cytokinin oxidase (CKX2)

SRNA\_AG01\_SoLexa\_Mi2008\_6\_14198\_hit2

5' GAUCAUUGCAAUUGUUGGU  
||| ||||| |||||||||  
GUAGAAACGUAAACAACCA 5'  
AT2G19970.1 399 417  
putative pathogenesis-related protein

SRNA\_AG01\_SoLexa\_Mi2008\_2\_3828\_hit2

5' AUUUGUCUGGUAAUUCGGUU  
||||| ||||||||| |||  
UAAACACACCAAUUAA--CAA 5'  
AT2G19990.1 70 88  
pathogenesis-related protein (PR-1)

SRNA\_AG01\_SoLexa\_Mi2008\_1\_52127\_hit1

5' UUGGAGGACCAGGUGGAA-AUU  
|||| ||||| ||||||| |||  
AACCACCUGGACCACCUUCUAA 5'  
AT2G24180.1 146 167  
cytochrome P450 like protein

SRNA\_AG01\_SoLexa\_Mi2008\_1\_14490\_hit1

5' GCAUCAAUAGAUAGUGUUGUAG  
||||||||||||| | |||||  
CGUAGUUACUAUC-C-ACAUC 5'  
AT2G26560.1 961 979  
similar to latex allergen from Hevea brasiliensis

roots\_1sup\_AG01\_SoLexa\_Mi\_Cell\_2008\_hit\_target\_site.txt

SRNA\_AG01\_SoLexa\_Mi2008\_1\_806\_hit1

5' AAGAGCAUCAUAGAUAG-UGUU  
|| |||||  
UU-UCGUAGUUACUAUCCACAU 5'

AT2G26560.1 962 982  
similar to latex allergen from Hevea brasiliensis

SRNA\_AG01\_SoLexa\_Mi2008\_3\_52435\_hit2

5' UUGGCUGCCGUUAUAG-ACUG  
||| ||||| ||||  
AACCGACGGCUUAUACGUGAC 5'

AT2G26820.1 343 363  
similar to avrRpt2-induced protein 1

SRNA\_AG01\_SoLexa\_Mi2008\_2\_15799\_hit1

5' GUCUGAAGGAUUAGAGGAAC  
|| ||||| |||||  
CA-ACUCCUAACCUCCUUC 5'

AT2G28190.1 109 127  
putative copper/zinc superoxide dismutase

SRNA\_AG01\_SoLexa\_Mi2008\_1\_18078\_hit67

5' UAAGCUCAUGGUCACGCACU  
||| |||||: ||| | ||  
AUUCGAGUACCGGUG-G-GA 5'

AT2G28190.1 619 636  
putative copper/zinc superoxide dismutase

SRNA\_AG01\_SoLexa\_Mi2008\_11\_14876\_hit4

5' GGAGGUGGUGG-UGG-UGGUGGU  
||| ||||| ||| ||||| |  
CCUCCACCACCAACCUACCACAA 5'

AT2G33770.1 108 130  
ubiquitin-conjugating enzyme E2 -like protein

SRNA\_AG01\_SoLexa\_Mi2008\_24\_502\_hit1

5' AAAGGAGGUGGUGGUUG-AU  
| ||||| ||||| ||  
UCUCCUCCACCACCAACCUA 5'

AT2G33770.1 114 133  
ubiquitin-conjugating enzyme E2 -like protein

SRNA\_AG01\_SoLexa\_Mi2008\_1\_28360\_hit2

5' UCAGCGGCGGAUCC-CACAAUGU  
||| ||||| || |||||  
AGUCACCGCCU-GGCGUGUUACA 5'

AT2G33770.1 1331 1352  
ubiquitin-conjugating enzyme E2 -like protein

SRNA\_AG01\_SoLexa\_Mi2008\_2\_10859\_hit1

5' CUCCAUCUCUCUCUGCUU  
||| ||||| ||||| ||  
GAGGAAGAGAGAGAGAC-AA 5'

AT2G33770.1 175 193  
ubiquitin-conjugating enzyme E2 -like protein

SRNA\_AG01\_SoLexa\_Mi2008\_4\_38337\_hit1

5' UGCCAAAGGAGAUUUGCCUGU  
||| |||||: ||||| |||||:  
ACGGUUUCUUAACGGGAUU 5'

AT2G33770.1 605 626  
ubiquitin-conjugating enzyme E2 -like protein

roots\_1sup\_AG01\_SoLexa\_Mi\_Cell\_2008\_hit\_target\_site.txt

SRNA\_AG01\_SoLexa\_Mi2008\_2\_7575\_hit2

5' CCAAAGGAGAGUUGCCUG  
|||||||:|||| |||||||:  
GGUUUCUUCUAAACGGGAU 5'

AT2G33770.1 606 624  
ubiquitin-conjugating enzyme E2 -like protein

SRNA\_AG01\_SoLexa\_Mi2008\_26\_14499\_hit2

5' GCCAAAGGAGAGUUGCCUG  
|||||||:|||| |||||||:  
CGGUUUCUUCUAAACGGGAU 5'

AT2G33770.1 606 625  
ubiquitin-conjugating enzyme E2 -like protein

SRNA\_AG01\_SoLexa\_Mi2008\_1041\_38329\_hit2

5' UGCCAAAGGAGAGUUGCCUG  
|||||||:|||| |||||||:  
ACGGUUUCUUCUAAACGGGAU 5'

AT2G33770.1 606 626  
ubiquitin-conjugating enzyme E2 -like protein

SRNA\_AG01\_SoLexa\_Mi2008\_2\_38332\_hit1

5' UGCCAAAGGAGAUUUGCCCG  
|||||||:||||||| :  
ACGGUUUCUUCUAAACGGGAU 5'

AT2G33770.1 606 626  
ubiquitin-conjugating enzyme E2 -like protein

SRNA\_AG01\_SoLexa\_Mi2008\_92\_38333\_hit1

5' UGCCAAAGGAGAUUUGCCCG  
|||||||:||||||| :  
ACGGUUUCUUCUAAACGGGAU 5'

AT2G33770.1 606 626  
ubiquitin-conjugating enzyme E2 -like protein

SRNA\_AG01\_SoLexa\_Mi2008\_101\_38336\_hit1

5' UGCCAAAGGAGAUUUGCCUG  
|||||||:||||||| :  
ACGGUUUCUUCUAAACGGGAU 5'

AT2G33770.1 606 626  
ubiquitin-conjugating enzyme E2 -like protein

SRNA\_AG01\_SoLexa\_Mi2008\_74\_51466\_hit1

5' UGCCAAAGGAGAGUUGCCUG  
|||||||:|||| |||||||:  
AACGGUUUCUUCUAAACGGGAU 5'

AT2G33770.1 606 627  
ubiquitin-conjugating enzyme E2 -like protein

SRNA\_AG01\_SoLexa\_Mi2008\_7\_38328\_hit2

5' UGCCAAAGGAGAGUUGCCU  
|||||||:|||| |||||||  
ACGGUUUCUUCUAAACGGGA 5'

AT2G33770.1 607 626  
ubiquitin-conjugating enzyme E2 -like protein

SRNA\_AG01\_SoLexa\_Mi2008\_2\_38335\_hit1

5' UGCCAAAGGAGAUUUGCCU  
|||||||:||||||| :  
ACGGUUUCUUCUAAACGGGA 5'

AT2G33770.1 607 626  
ubiquitin-conjugating enzyme E2 -like protein

roots\_1sup\_AG01\_SoLexa\_Mi\_Cell\_2008\_hit\_target\_site.txt

SRNA\_AG01\_SoLexa\_Mi2008\_1\_51465\_hit1

5' UGCCAAAGGAGAGUUGCCU  
|||||||:||||  
AACGGUUUCUUCUAAACGGGA 5'

AT2G33770.1 607 627  
ubiquitin-conjugating enzyme E2 -like protein

SRNA\_AG01\_SoLexa\_Mi2008\_3\_38327\_hit2

5' UGCCAAAGGAGAGUUGCC  
|||||||:||||  
ACGGUUUCUUCUAAACGGG 5'

AT2G33770.1 608 626  
ubiquitin-conjugating enzyme E2 -like protein

SRNA\_AG01\_SoLexa\_Mi2008\_1\_38331\_hit4

5' UGCCAAAGGAGAUUUGCC  
|||||||:|||||||  
ACGGUUUCUUCUAAACGGG 5'

AT2G33770.1 608 626  
ubiquitin-conjugating enzyme E2 -like protein

SRNA\_AG01\_SoLexa\_Mi2008\_4\_38337\_hit1

5' UGCCAAAGGAGAUUUGCCUGU  
|||||||:|||||||  
ACGGUUUCCUCUAUACGGGAUC 5'

AT2G33770.1 738 759  
ubiquitin-conjugating enzyme E2 -like protein

SRNA\_AG01\_SoLexa\_Mi2008\_2\_38332\_hit1

5' UGCCAAAGGAGAUUUGCCCG  
|||||||:|||||||  
ACGGUUUCCUCUAUACGGGAU 5'

AT2G33770.1 739 759  
ubiquitin-conjugating enzyme E2 -like protein

SRNA\_AG01\_SoLexa\_Mi2008\_92\_38333\_hit1

5' UGCCAAAGGAGAUUUGCCCG  
|||||||:|||||||  
ACGGUUUCCUCUAUACGGGAU 5'

AT2G33770.1 739 759  
ubiquitin-conjugating enzyme E2 -like protein

SRNA\_AG01\_SoLexa\_Mi2008\_101\_38336\_hit1

5' UGCCAAAGGAGAUUUGCCUG  
|||||||:|||||||  
ACGGUUUCCUCUAUACGGGAU 5'

AT2G33770.1 739 759  
ubiquitin-conjugating enzyme E2 -like protein

SRNA\_AG01\_SoLexa\_Mi2008\_22\_15117\_hit2

5' GGCUACCACAUCCAAGGAAGG  
|| || ||||| |||||  
CC-AUAGUGUAGCUUCCUCC 5'

AT2G33770.1 73 92  
ubiquitin-conjugating enzyme E2 -like protein

SRNA\_AG01\_SoLexa\_Mi2008\_2\_7575\_hit2

5' CCAAAGGAGAGU-UGCCUG  
|||||||:|||||||  
GGUUUCCUCU-AUACGGGAU 5'

AT2G33770.1 740 758  
ubiquitin-conjugating enzyme E2 -like protein



roots\_1sup\_AG01\_SoIexa\_Mi\_Cell\_2008\_hit\_target\_site.txt

SRNA\_AG01\_SoIexa\_Mi2008\_6\_14501\_hit1  
5' GCCAAAGGAGAUUUGCCCGG  
|||||||:|  
CGGUUCCUCUAAACGGGUUG 5'  
AT2G33770.1 827 847  
ubiquitin-conjugating enzyme E2 -like protein

SRNA\_AG01\_SoIexa\_Mi2008\_4\_38334\_hit1  
5' UGCCAAAGGAGAUUUGCCCGG  
|||||||:|  
ACGGUUCCUCUAAACGGGUUG 5'  
AT2G33770.1 827 848  
ubiquitin-conjugating enzyme E2 -like protein

SRNA\_AG01\_SoIexa\_Mi2008\_4\_38337\_hit1  
5' UGCCAAAGGAGAUUUGCCCGU  
|||||||:|  
ACGGUUCCUCUAAACGGGUUG 5'  
AT2G33770.1 827 848  
ubiquitin-conjugating enzyme E2 -like protein

SRNA\_AG01\_SoIexa\_Mi2008\_2\_7575\_hit2  
5' CCAAAGGAGAGUUGCCUG  
|||||||:|  
GGUUCCUCUAAACGGGUUG 5'  
AT2G33770.1 828 846  
ubiquitin-conjugating enzyme E2 -like protein

SRNA\_AG01\_SoIexa\_Mi2008\_26\_14499\_hit2  
5' GCCAAAGGAGAGUUGCCUG  
|||||||:|  
CGGUUCCUCUAAACGGGUUG 5'  
AT2G33770.1 828 847  
ubiquitin-conjugating enzyme E2 -like protein

SRNA\_AG01\_SoIexa\_Mi2008\_1041\_38329\_hit2  
5' UGCCAAAGGAGAGUUGCCUG  
|||||||:|  
ACGGUUCCUCUAAACGGGUUG 5'  
AT2G33770.1 828 848  
ubiquitin-conjugating enzyme E2 -like protein

SRNA\_AG01\_SoIexa\_Mi2008\_2\_38332\_hit1  
5' UGCCAAAGGAGAUUUGCCCG  
|||||||:|  
ACGGUUCCUCUAAACGGGUUG 5'  
AT2G33770.1 828 848  
ubiquitin-conjugating enzyme E2 -like protein

SRNA\_AG01\_SoIexa\_Mi2008\_92\_38333\_hit1  
5' UGCCAAAGGAGAUUUGCCCG  
|||||||:|  
ACGGUUCCUCUAAACGGGUUG 5'  
AT2G33770.1 828 848  
ubiquitin-conjugating enzyme E2 -like protein

SRNA\_AG01\_SoIexa\_Mi2008\_101\_38336\_hit1  
5' UGCCAAAGGAGAUUUGCCUG  
|||||||:|  
ACGGUUCCUCUAAACGGGUUG 5'  
AT2G33770.1 828 848  
ubiquitin-conjugating enzyme E2 -like protein

SRNA\_AG01\_SoLexa\_Mi2008\_7\_38328\_hit2

5' UGCCAAAGGAGAGUUUGCCCU

|||||

ACGGUUUCCUCUAAACGGGU 5'

AT2G33770.1 829 848

ubiquitin-conjugating enzyme E2 -like protein

SRNA\_AG01\_SoLexa\_Mi2008\_2\_38335\_hit1

5' UGCCAAAGGAGAUUUGCCCU

|||||

ACGGUUUCCUCUAAACGGGU 5'

AT2G33770.1 829 848

ubiquitin-conjugating enzyme E2 -like protein

SRNA\_AG01\_SoLexa\_Mi2008\_1\_51465\_hit1

5' UUGCCAAAGGAGAGUUUGCCCU

|||||

UACGGUUUCCUCUAAACGGGU 5'

AT2G33770.1 829 849

ubiquitin-conjugating enzyme E2 -like protein

SRNA\_AG01\_SoLexa\_Mi2008\_3\_38327\_hit2

5' UGCCAAAGGAGAGUUUGCCC

|||||

ACGGUUUCCUCUAAACGGG 5'

AT2G33770.1 830 848

ubiquitin-conjugating enzyme E2 -like protein

SRNA\_AG01\_SoLexa\_Mi2008\_1\_38331\_hit4

5' UGCCAAAGGAGAUUUGCCC

|||||

ACGGUUUCCUCUAAACGGG 5'

AT2G33770.1 830 848

ubiquitin-conjugating enzyme E2 -like protein

SRNA\_AG01\_SoLexa\_Mi2008\_2\_38335\_hit1

5' UGCCAAAGGAGAUUUGCCCU

|||||

ACGGUUUCCUCUAAACGAGC 5'

AT2G33770.1 886 905

ubiquitin-conjugating enzyme E2 -like protein

SRNA\_AG01\_SoLexa\_Mi2008\_3\_38327\_hit2

5' UGCCAAAGGAGAGUUUGCCC

|||||

ACGGUUUCCUCUAAACGAG 5'

AT2G33770.1 887 905

ubiquitin-conjugating enzyme E2 -like protein

SRNA\_AG01\_SoLexa\_Mi2008\_1\_38331\_hit4

5' UGCCAAAGGAGAUUUGCCC

|||||

ACGGUUUCCUCUAAACGAG 5'

AT2G33770.1 887 905

ubiquitin-conjugating enzyme E2 -like protein

SRNA\_AG01\_SoLexa\_Mi2008\_2\_38335\_hit1

5' UGCCAAAGGAGAUUUGCCCU

|||||

ACGGUUUCCUCUAAACGAGA 5'

AT2G33770.1 943 962

ubiquitin-conjugating enzyme E2 -like protein

roots\_1sup\_AG01\_SoIexa\_Mi\_Cell\_2008\_hit\_target\_site.txt

SRNA\_AG01\_SoIexa\_Mi2008\_3\_38327\_hit2

5' UGCCAAAGGAGAGUUGCCC  
 ||| |  
 ACGGUUCCUCUAAACGAG 5'  
 AT2G33770.1 944 962  
 ubiquitin-conjugating enzyme E2 -like protein

SRNA\_AG01\_SoIexa\_Mi2008\_1\_38331\_hit4

5' UGCCAAAGGAGAUUUGCCC  
 ||| |  
 ACGGUUCCUCUAAACGAG 5'  
 AT2G33770.1 944 962  
 ubiquitin-conjugating enzyme E2 -like protein

SRNA\_AG01\_SoIexa\_Mi2008\_14\_21346\_hit1

5' UAGA-GCU-UUGAAGAACGUUGGU  
 ||| | ||| |  
 AUCUACGACAACUUCUUGCGACCA 5'  
 AT2G43610.1 319 342  
 endochitinase like protein

SRNA\_AG01\_SoIexa\_Mi2008\_1\_56576\_hit1

5' UUUUG-GUCGCCAUGUUUUU-CUU  
 ||| | ||| | ||| | ||| |  
 AAAACACAGCGGUAAAAAAGGAA 5'  
 AT2G43610.1 31 54  
 endochitinase like protein

SRNA\_AG01\_SoIexa\_Mi2008\_3\_12867\_hit1

5' CUUGCCUCUUGCUAUUUCUCU  
 ||| | ||| | ||| | ||| |  
 GAA-GGAGACCGAUAAAGAAGA 5'  
 AT2G43610.1 505 525  
 endochitinase like protein

SRNA\_AG01\_SoIexa\_Mi2008\_1\_3384\_hit1

5' AUGGUGAAGAUGU-UUC-UAGU  
 ||| | ||| | ||| | ||| |  
 UACCACUUCUACAGAAGCAUGA 5'  
 AT3G01420.1 291 312  
 feebly like protein

SRNA\_AG01\_SoIexa\_Mi2008\_3\_13839\_hit1

5' GACUCAGAGAUUCAGGAAAA  
 ||| | ||| | ||| | ||| |  
 CUGUGUCUCUUGUCCUUUG 5'  
 AT3G13620.1 439 457  
 unknown protein

SRNA\_AG01\_SoIexa\_Mi2008\_1\_741\_hit2

5' AAGAAA-AAAAAAGUAUUGAC  
 || ||| | ||| | ||| | ||| |  
 UU-UUUGUUUUUUCAUAACUU 5'  
 AT3G24503.1 1651 1670  
 aldehyde dehydrogenase

SRNA\_AG01\_SoIexa\_Mi2008\_1\_336\_hit2

5' AAAGAAA-AAAAAAGUAUUGA  
 || ||| | ||| | ||| | ||| |  
 CUU-UUUGUUUUUUCAUAACU 5'  
 AT3G24503.1 1652 1671  
 aldehyde dehydrogenase

roots\_1sup\_AG01\_SoLexa\_Mi\_Cell\_2008\_hit\_target\_site.txt

SRNA\_AG01\_SoLexa\_Mi2008\_2\_49752\_hit2

5' UUCUCUACAAACUUUCCACA  
 ||||| |||||:| |||||  
 AAGAGAUGAUUGAAGA-GGUGU 5'  
 AT3G24503.1 998 1018  
 aldehyde dehydrogenase

SRNA\_AG01\_SoLexa\_Mi2008\_1\_15541\_hit2

5' GUAGUUGUGAUACAUGGAA-GAC  
 ||||| ||||| ||  
 CAUCAACACUACGUACCUUUCUU 5'  
 AT3G25190.1 728 750  
 unknown protein

SRNA\_AG01\_SoLexa\_Mi2008\_3\_23318\_hit2

5' UAG-GUAAAAACAUCUGGUCUA  
 ||| ||||| ||||| |||||  
 AUCACAUUUU-GUAGACCAGAG 5'  
 AT3G44300.1 961 981  
 nitrilase 2

SRNA\_AG01\_SoLexa\_Mi2008\_18\_30815\_hit1

5' UCGAGGGUGUUGAAUAUGUUUU  
 ||| ||||| ||||| |||||  
 AGCGCCACAACUUAGA-AAAA 5'  
 AT3G47540.1 171 191  
 endochitinase-like protein

SRNA\_AG01\_SoLexa\_Mi2008\_3\_18344\_hit1

5' UAAG-GUCGAGGGUGUUGAAU  
 |||| |||| ||||| |||||  
 AUUCUCAGCGCCACAACUUA 5'  
 AT3G47540.1 177 197  
 endochitinase-like protein

SRNA\_AG01\_SoLexa\_Mi2008\_6\_14033\_hit2

5' GAGGAAACUCUGGUGGAAGC  
 :||| ||||| ||||| |||||  
 UUCUUUAAAACCAACCUUCG 5'  
 AT3G47540.1 18 37  
 endochitinase-like protein

SRNA\_AG01\_SoLexa\_Mi2008\_5\_427\_hit1

5' AAAGAUGUUGUC-GCUA-UGU  
 ||||| ||||| ||| |||  
 UUUCUACAACAGACGUUUA 5'  
 AT3G54640.1 1167 1187  
 tryptophan synthase alpha chain

SRNA\_AG01\_SoLexa\_Mi2008\_1\_53131\_hit2

5' UUGGUGUUGGU-GGUGUAAUGA  
 ||||| ||| ||||| |||  
 AACCACA-CCAACCACAUCACU 5'  
 AT3G54640.1 816 836  
 tryptophan synthase alpha chain

SRNA\_AG01\_SoLexa\_Mi2008\_1\_2108\_hit2

5' AGGAAACGUGGUGGUGGUCGGAA  
 ||||| ||||| |||||  
 UCCUUUGCACCACCA--AGCCUC 5'  
 AT4G02850.1 232 252  
 unknown protein

roots\_1sup\_AG01\_SoLexa\_Mi\_Cell\_2008\_hit\_target\_site.txt

SRNA\_AG01\_SoLexa\_Mi2008\_2\_6203\_hit1

5' CAGAUUCUCAGGAUGACAGCAC  
|||||||:|:||||| |||||  
GUCUAAGGGUUCUACUUUCGUG 5'  
AT4G02850.1 613 634  
unknown protein

SRNA\_AG01\_SoLexa\_Mi2008\_1\_14022\_hit2

5' GAGCUCUUUCUUGA--UUCUA  
||||||| |||||  
CUCGAGAAAGAACUGAAAGAG 5'  
AT4G12400.2 1176 1196  
stress-induced protein sti1 -like protein

SRNA\_AG01\_SoLexa\_Mi2008\_1\_14022\_hit2

5' GAGCUCUUUCUUGA-UU-CUA  
||||||| |||||  
CUCGAGAAAGAACUGAAAGAG 5'  
AT4G12400.1 1178 1198  
stress-induced protein sti1 -like protein

SRNA\_AG01\_SoLexa\_Mi2008\_1\_53208\_hit1

5' UUGGUUGGUGAUAGGCUGAUAGCU  
||||||| ||| ||||| |||  
AACCAACCACUUCCAACUAACGA 5'  
AT4G12400.2 202 225  
stress-induced protein sti1 -like protein

SRNA\_AG01\_SoLexa\_Mi2008\_1\_53208\_hit1

5' UUGGUUGGUGAUAGGCUGAUAGCU  
||||||| ||| ||||| |||  
AACCAACCACUUCCAACUAACGA 5'  
AT4G12400.1 204 227  
stress-induced protein sti1 -like protein

SRNA\_AG01\_SoLexa\_Mi2008\_19\_53207\_hit1

5' UUGGUUGGUGAUAGGCUGAUA  
||||||| ||| |||||  
AACCAACCACUUCCAACUAA 5'  
AT4G12400.2 205 225  
stress-induced protein sti1 -like protein

SRNA\_AG01\_SoLexa\_Mi2008\_1\_53206\_hit1

5' UUGGUUGGUGAUAGGCUGAU  
||||||| ||| |||||  
AACCAACCACUUCCAACUA 5'  
AT4G12400.2 206 225  
stress-induced protein sti1 -like protein

SRNA\_AG01\_SoLexa\_Mi2008\_19\_53207\_hit1

5' UUGGUUGGUGAUAGGCUGAUA  
||||||| ||| |||||  
AACCAACCACUUCCAACUAA 5'  
AT4G12400.1 207 227  
stress-induced protein sti1 -like protein

SRNA\_AG01\_SoLexa\_Mi2008\_1\_53206\_hit1

5' UUGGUUGGUGAUAGGCUGAU  
||||||| ||| |||||  
AACCAACCACUUCCAACUA 5'  
AT4G12400.1 208 227  
stress-induced protein sti1 -like protein

roots\_1sup\_AG01\_SoLexa\_Mi\_Cell\_2008\_hit\_target\_site.txt

SRNA\_AG01\_SoLexa\_Mi2008\_1\_173\_hit2

5' AAAAGAAGAAGAUAAAGCAU  
|||||  
UUUUCUUCUUCU-GUU-GUA 5'

AT4G13180.1 853 870  
short-chain alcohol dehydrogenase like protein

SRNA\_AG01\_SoLexa\_Mi2008\_1\_29609\_hit1

5' UCCCAAACAUAUUGU-AGUA  
| |||||  
AUGGUUUUGUUUAAA-AUUCAU 5'

AT4G13510.1 1604 1624  
ammonium transport protein (AMT1)

SRNA\_AG01\_SoLexa\_Mi2008\_1\_40276\_hit1

5' UGGAGAGGAAUCACUCGAUUC  
|||||  
ACCUCUCCUUAGUGA-CCAAG 5'

AT4G13770.1 1119 1138  
cytochrome P450 monooxygenase (CYP83A1)

SRNA\_AG01\_SoLexa\_Mi2008\_5\_4586\_hit1

5' CAAGAAUGAGGGUAAGG-GA  
|||| |:|||||  
GUUCGUGCUCUUAUCCUCU 5'

AT4G13770.1 1133 1153  
cytochrome P450 monooxygenase (CYP83A1)

SRNA\_AG01\_SoLexa\_Mi2008\_6\_19507\_hit1

5' UACAGUAAACUCAGAAGCGAA  
|||||  
AUGUCAUUUGAGUCUUCGCUU 5'

AT4G13770.1 869 889  
cytochrome P450 monooxygenase (CYP83A1)

SRNA\_AG01\_SoLexa\_Mi2008\_2\_50423\_hit1

5' UUGACUACAAAAGAUGGAGCA  
||||| ||| |||||  
CACUGAGGUUGUCUACCUCGU 5'

AT4G34110.1 2112 2132  
poly(A)-binding protein

SRNA\_AG01\_SoLexa\_Mi2008\_6\_33555\_hit1

5' UCUGCUCGGUGCUUUAGGGUC  
|||||  
AGACGAGCCACGAAAUCCAG 5'

AT4G34710.2 2279 2299  
arginine decarboxylase (spe2)

SRNA\_AG01\_SoLexa\_Mi2008\_6\_33555\_hit1

5' UCUGCUCGGUGCUUUAGGGUC  
|||||  
AGACGAGCCACGAAAUCCAG 5'

AT4G34710.1 2414 2434  
arginine decarboxylase (spe2)

SRNA\_AG01\_SoLexa\_Mi2008\_1\_2984\_hit1

5' AUGACAACAACCAACCACACGU  
||| ||||| |||||  
UAC-GUUGUUGUUUGGUGUCU 5'

AT4G34710.2 2534 2554  
arginine decarboxylase (spe2)

roots\_1sup\_AG01\_SoLexa\_Mi\_Cell\_2008\_hit\_target\_site.txt

SRNA\_AG01\_SoLexa\_Mi2008\_1\_2984\_hit1

5' AUGACAACAACCAACCACACGU  
||| ||||| |||||  
UAC-GUUGUUGUUUGGUGUGCU 5'  
AT4G34710.1 2669 2689  
arginine decarboxylase (spe2)

SRNA\_AG01\_SoLexa\_Mi2008\_1\_35545\_hit1

5' UGACGGCAAACCUAGGUCC  
|||||  
ACUGCCGUUUGGACAUCAGG 5'  
AT4G34980.1 1667 1687  
subtilisin proteinase - like

SRNA\_AG01\_SoLexa\_Mi2008\_6\_13612\_hit1

5' GACAGAAGAAAGAGAGCAC  
|| |||||  
CU-UCUUCUUUCUCUCGCU 5'  
AT4G35000.1 136 153  
L-ascorbate peroxidase

SRNA\_AG01\_SoLexa\_Mi2008\_6\_35236\_hit1

5' UGACAGAAGAAAGAGAGCAC  
||| |||||  
ACU-UCUUCUUUCUCUCGCU 5'  
AT4G35000.1 136 154  
L-ascorbate peroxidase

SRNA\_AG01\_SoLexa\_Mi2008\_22\_5333\_hit1

5' CACAGAGAUUGAGAACGAA  
|||||:||||  
GUGUCUCUAGCUCUCGCUA 5'  
AT4G35000.1 396 414  
L-ascorbate peroxidase

SRNA\_AG01\_SoLexa\_Mi2008\_6\_4720\_hit1

5' CAAGCAUCACAGGAGUAAUA  
|||||  
GUUCGUAGUGUCCUUAUUAU 5'  
AT4G35630.1 1006 1025  
phosphoserine aminotransferase

SRNA\_AG01\_SoLexa\_Mi2008\_5\_15466\_hit1

5' GUAGCCACCCUGAUUGUUGUU  
||||| || |||||  
CAUCGGCGGUACUAACAACAC 5'  
AT4G35630.1 136 156  
phosphoserine aminotransferase

SRNA\_AG01\_SoLexa\_Mi2008\_23\_6630\_hit1

5' CAGGUG-GAAGACAAGAU CGA  
| |||| |||||  
GGCCACUCUUCUGUUCUAGCC 5'  
AT4G37390.1 348 368  
auxin-responsive GH3 homolog (CF4)

SRNA\_AG01\_SoLexa\_Mi2008\_2\_35755\_hit1

5' UGAGAAACACGGUCAUGGU  
||||| ||||  
ACUCUUUGAGCCACUACCC 5'  
AT4G37390.1 365 383  
auxin-responsive GH3 homolog (CF4)

roots\_1sup\_AG01\_SoLexa\_Mi\_Cell\_2008\_hit\_target\_site.txt

SRNA\_AG01\_SoLexa\_Mi2008\_1\_55562\_hit1

5' UUUGGAGCAAAAACGU-UUUA  
|||||  
AAACCUCGUUUUUG-AGAAAU 5'

AT4G39940.1 1154 1173  
adenosine-5'-phosphosulfate-kinase

SRNA\_AG01\_SoLexa\_Mi2008\_10\_5525\_hit1

5' CACCGGACGAUCUUCU-CGA  
||| |||||  
AUGGACUGCUAGAAGAUGCU 5'

AT5G02780.2 107 126  
putative protein

SRNA\_AG01\_SoLexa\_Mi2008\_1\_28867\_hit2

5' UCAUCAUCUAGCACACCCUUG  
|| ||||| ||| |||||  
AG-AGUAGAACGUCUGGGAAC 5'

AT5G02780.2 234 253  
putative protein

SRNA\_AG01\_SoLexa\_Mi2008\_1\_13977\_hit25

5' GAGAUA-AGCCAUGGAAAGGAU  
||||| ||||| |||||  
CUCUAUCUCGGUACCUCUCCUA 5'

AT5G02780.2 73 94  
putative protein

SRNA\_AG01\_SoLexa\_Mi2008\_1\_37628\_hit1

5' UGCAAAAACGGAUAAU-CU-AGC  
||||| ||||| ||| |||  
ACGUUUUUGCCUUAACGAUUCG 5'

AT5G13750.2 534 556  
transporter-like protein

SRNA\_AG01\_SoLexa\_Mi2008\_1\_52493\_hit1

5' UUGGGAGAGAUUAUGAUGUC  
||||| | |||||  
AACCCCCGCUAUACUACAC 5'

AT5G13750.3 67 85  
transporter-like protein

SRNA\_AG01\_SoLexa\_Mi2008\_1\_37628\_hit1

5' UGCAAAAACGGAUAAU-CUA-GC  
||||| ||||| ||| |||  
ACGUUUUUGCCUUAACGAUUCG 5'

AT5G13750.3 759 781  
transporter-like protein

SRNA\_AG01\_SoLexa\_Mi2008\_1\_40339\_hit1

5' UGGAGAUGGAAGAUGAG-CC  
||||| ||||| ||| |||  
ACCUCUACCUCCACUCUGG 5'

AT5G13930.1 876 895  
chalcone synthase (naringenin-chalcone synthase) (testa 4 protein) (sp|P13114)

SRNA\_AG01\_SoLexa\_Mi2008\_1\_146\_hit4

5' AAAACAAAAGAGGAAGAAGCU  
||||| |||||: |||||  
UUUUGGUUUUCUUAUUCUUCGA 5'

AT5G14120.1 2132 2152  
nodulin-like protein

roots\_1sup\_AG01\_SoLexa\_Mi\_Cell\_2008\_hit\_target\_site.txt

SRNA\_AG01\_SoLexa\_Mi2008\_9\_40544\_hit1

5' UGGAGGCAGCUUGUGUGAUGG  
||||| ||||||||| |||||  
ACCUC-GUCGAACACAAUACCU 5'  
AT5G19110.1 1178 1198  
dermal glycoprotein - like

SRNA\_AG01\_SoLexa\_Mi2008\_4\_40543\_hit1

5' UGGAGGCAGCUUGUGUGAUGG  
||||| ||||||||| |||||  
ACCUC-GUCGAACACAAUACC 5'  
AT5G19110.1 1179 1198  
dermal glycoprotein - like

SRNA\_AG01\_SoLexa\_Mi2008\_7\_15186\_hit1

5' GGGCGUUUGGUUUCUUGUAA  
:|| ||||||||| |||||||||  
UCC-CAAACCAACGAACAUU 5'  
AT5G19110.1 303 321  
dermal glycoprotein - like

SRNA\_AG01\_SoLexa\_Mi2008\_17\_45019\_hit1

5' UGU-GAUCACCGUUUGAAGUA  
||| ||| | |||||||||  
ACAUCUA-UAGCCAAACUUCAU 5'  
AT5G19110.1 800 820  
dermal glycoprotein - like

SRNA\_AG01\_SoLexa\_Mi2008\_1\_54615\_hit4

5' UUUUUG-GGUACACAAUUA  
||||:| |||||||||  
AAAUGACACCAUGUGUUUA 5'  
AT5G23010.1 1621 1641  
2-isopropylmalate synthase-like; homocitrate synthase-like

SRNA\_AG01\_SoLexa\_Mi2008\_2\_255\_hit1

5' AAA-AUAGUGUGGAA-UGUUA  
||| ||||||||| |||||  
UUUCUAUCACACCCUUAACAAA 5'  
AT5G23010.1 5 26  
2-isopropylmalate synthase-like; homocitrate synthase-like

SRNA\_AG01\_SoLexa\_Mi2008\_9\_13465\_hit1

5' GAAGAUGG-GUGGAAUUGUUU  
|||||:| |||||||||  
AUUCUAUCACACCCUUAACAAA 5'  
AT5G23010.1 5 26  
2-isopropylmalate synthase-like; homocitrate synthase-like

SRNA\_AG01\_SoLexa\_Mi2008\_13\_4545\_hit1

5' CAAGAAAGAUUGUUGCGUU  
||||| |||||||||  
ACUCUUUCAACCAACAGCAA 5'  
AT5G39050.1 534 553  
Anthocyanin acyltransferase - like protein

SRNA\_AG01\_SoLexa\_Mi2008\_1\_13420\_hit2

5' GAAGAAGAAGAAGACUCUU  
|| |||||||||  
CUCCUUCUUCUUCUGAGAA 5'  
AT5G39050.1 830 848  
Anthocyanin acyltransferase - like protein

roots\_1sup\_AG01\_SoLexa\_Mi\_Cell\_2008\_hit\_target\_site.txt

SRNA\_AG01\_SoLexa\_Mi2008\_1\_4090\_hit1  
5' CA-AAGAGUAGACAAUCAUCA  
|| |||||:||||| |||  
GUAUUCUCAUUUGUUAGU-GUU 5'  
AT5G39050.1 888 908  
Anthocyanin acyltransferase - like protein

SRNA\_AG01\_SoLexa\_Mi2008\_6\_13767\_hit2  
5' GA-CGCAGAUUUAGGGAUUCU  
|| |||||:||||| |  
CUAGCGUCUAAGUCCUAAAA 5'  
AT5G44380.1 1338 1358  
berberine bridge enzyme-like protein

SRNA\_AG01\_SoLexa\_Mi2008\_13\_6614\_hit40  
5' CAGGUCGAGUAACAGUAAA  
||||||| | ||||  
GUCCAGCUCAUUAU-AUUU 5'  
AT5G44380.1 474 491  
berberine bridge enzyme-like protein

SRNA\_AG01\_SoLexa\_Mi2008\_1\_8282\_hit1  
5' CGAAAUCAGAUCCAAUA-GCUU  
||||| ||||| ||||  
ACUUUAAUCUAGGUUAUACGAA 5'  
AT5G45070.1 1147 1168  
unknown protein

SRNA\_AG01\_SoLexa\_Mi2008\_34\_10628\_hit1  
5' CUCAAGAAAGCUGUGGGAAA  
||||||| |:|||  
GAGUUCUUUCGA-AUCCUUC 5'  
AT5G45070.1 153 171  
unknown protein

SRNA\_AG01\_SoLexa\_Mi2008\_4\_14764\_hit1  
5' GCUCAAGAAAGCUGUGGGAAA  
||||||| |:|||  
CGAGUUCUUUCGA-AUCCUUC 5'  
AT5G45070.1 153 172  
unknown protein

SRNA\_AG01\_SoLexa\_Mi2008\_1\_14763\_hit1  
5' GCUCAAGAAAGCUGUGGGAA  
||||||| |:|||  
CGAGUUCUUUCGA-AUCCUU 5'  
AT5G45070.1 154 172  
unknown protein

SRNA\_AG01\_SoLexa\_Mi2008\_25\_30803\_hit10  
5' UCGAGGGGCGUAUUAGGGA  
|||||||  
AGCUCCCCGCAUAAUCCC\_ 5'  
AT5G48000.1 -1 18  
cytochrome P450-like protein

SRNA\_AG01\_SoLexa\_Mi2008\_25\_29907\_hit10  
5' UCCGCACAUACUCAACCCGA  
|||||||  
AGGCGUGUAUGAGUUGGGCU 5'  
AT5G48000.1 100 119  
cytochrome P450-like protein





roots\_1sup\_AG01\_SoLexa\_Mi\_Cell\_2008\_hit\_target\_site.txt

SRNA\_AG01\_SoLexa\_Mi2008\_7\_12746\_hit1

5' CUUGACCUUGUAAGACCCC  
|||||||:|||||||  
GAACUGGAACGUUCUGGGA 5'  
AT5G60450.1 2083 2101  
auxin response factor 4

SRNA\_AG01\_SoLexa\_Mi2008\_7\_49852\_hit1

5' UUCUUGACCUUGUAAGACCCC  
|||||||:|||||||  
AAGAACUGGAACGUUCUGGGA 5'  
AT5G60450.1 2083 2103  
auxin response factor 4

SRNA\_AG01\_SoLexa\_Mi2008\_4\_55012\_hit1

5' UUUCUUGACCUUGUAAGACCCC  
|||||||:|||||||  
AAAGAACUGGAACGUUCUGGGA 5'  
AT5G60450.1 2083 2104  
auxin response factor 4

SRNA\_AG01\_SoLexa\_Mi2008\_1\_55011\_hit1

5' UUUCUUGACCUUGUAAGACCCC  
|||||||:|||||||  
AAAGAACUGGAACGUUCUGGG 5'  
AT5G60450.1 2084 2104  
auxin response factor 4

SRNA\_AG01\_SoLexa\_Mi2008\_2\_34797\_hit1

5' UGAAGGGGGACCCGAGGAUUG  
|||||||:|||||||  
ACUUCUUUUUGGGCUCCUAC 5'  
AT5G60450.1 2266 2286  
auxin response factor 4

SRNA\_AG01\_SoLexa\_Mi2008\_3\_13421\_hit1

5' GAAGAAGAAGAUGAUGUUGAU  
||||||| |||| |||  
CUUCUUCUUCUUCUACCACUU 5'  
AT5G60450.1 621 641  
auxin response factor 4

SRNA\_AG01\_SoLexa\_Mi2008\_1\_7242\_hit1

5' CAUGGAGAAGAAGAAUGA-GGU  
||||:||||||| || |||  
GUACUUCUUCUUCU-CUACCA 5'  
AT5G60450.1 625 645  
auxin response factor 4

SRNA\_AG01\_SoLexa\_Mi2008\_1\_25289\_hit1

5' UAUGACGAUGAUGAUGACGGA  
:||||||| ||||  
GUACUGCUACUACUA-GGCCU 5'  
AT5G60450.1 650 669  
auxin response factor 4

SRNA\_AG01\_SoLexa\_Mi2008\_9\_14254\_hit8

5' GAUGAUGAUGAUGAUGAUCUU  
|||||||:|||||||:  
CUACUACUGCUACUACUAGGC 5'  
AT5G60450.1 651 671  
auxin response factor 4
